# Supplementary material for: Structural Magnetic Resonance Imaging and Genome-Wide Transcriptional Profiling Reveal Intergenerational Vulnerability in a Mouse Model of Preconceptional Stress
Source: Research Square preprint supplement (doi:10.21203/rs.3.rs-7535749/v1), 2025-10-01
Supplement: Supplementary file 1 [file 1ef1f0332629711b727278b2.docx]

**Structural Magnetic Resonance Imaging and Genome-Wide Transcriptional Profiling Reveal Intergenerational Vulnerability in a Mouse Model of Preconceptional Stress**

Monica Iachizzi1§, Amalie Couch2§, Eugene Kim3, Felisa Herrero1, Ron Schär1, Robert Leonardo Schweri1, Dauda Abdullahi3, Lennart Opitz6, Annamaria Cattaneo7,8, Marco Andrea Riva7,8, Urs Meyer1,5, Anthony C. Vernon2,4#, Juliet Richetto#1,5*

1Institute of Pharmacology and Toxicology, University of Zurich-Vetsuisse, Zurich, Switzerland.

2Department of Basic and Clinical Neuroscience, Institute of Psychiatry, Psychology and Neuroscience, King’s College London, London, United Kingdom

3Department of Neuroimaging, Institute of Psychiatry, Psychology and Neuroscience King's College, London, United Kingdom

4MRC Centre for Neurodevelopmental Disorders, King’s College London, London, United Kingdom

5Neuroscience Center Zurich, University of Zurich and ETH Zurich, Zurich, Switzerland.

6Functional Genomics Center Zurich, University of Zurich and ETH Zurich, Zurich, Switzerland.

6Department of Pharmacological and Biomolecular Sciences, University of Milan, Milan, Italy

7Biological Psychiatry Laboratory, IRCCS Istituto Centro San Giovanni di Dio Fatebenefratelli, Brescia, Italy

***Correspondence:**

Dr. Juliet Richetto, Ph.D., Institute of Pharmacology and Toxicology, University of Zurich-Vetsuisse, Winterthurerstrasse 260, 8057 Zurich, Switzerland.

E-mail: [juliet.richetto@uzh.ch](mailto:juliet.richetto@uzh.ch); Tel.: +41 44 635 87 77; Fax.: +41 44 635 89 10.

§These authors corresponded equally to the present study.

#Shared seniority.

1. **Supplementary methods**
   1. **Animal husbandry and group allocation**

C57BL6/N mice were housed in individually ventilated cages (IVCs) in a specific-pathogen-free (SPF) holding room, which was temperature- and humidity-controlled (21 ± 3 °C, 50 ± 10%) and kept under a reversed light–dark cycle (lights off: 09:00 AM–09.00 PM). All animals had *ad libitum* access to the same food (Kliba 3436, Kaiseraugst, Switzerland) and water throughout the entire study. An overview of the animals included in each experiment can be found in the following Table.

| **Maternal Housing** | **Animals** | **Litters** | **Offspring included in Behavioral and ex-vivo MRI Testing** | **Offspring included in NGS sequencing** |
| --- | --- | --- | --- | --- |
| GRP | 14F | 7 | 8M, 8F | 8M, 8F |
| SIR | 14F | 7 | 16M, 16F | 7M, 8F |

**Supplementary Table S1.** Number andallocation of socially isolated (SIR) and group-housed (GRP) female animals. The table also specifies the final number of litters in each group, and the final number of offspring exposed to behavioral and ex-vivo MRI testing. The number of dams and litters included in each group was based on previous studies conducted in our laboratory based on other prenatal manipulation models.

**1.2 Timed mating**

Timed-pregnant animals were generated via on-site breeding, which began after the 10 weeks of social isolation. To this end, 14 SIR and 14 GRP female animals were subjected to a timed-mating procedure as described previously1,2. Successful mating was verified by the presence of a vaginal plug, upon which dams that had previously been socially isolated were housed individually throughout gestation, while dams that had previously been group housed were housed in groups of two up until 2 days prior to delivery of the pups, to keep each litter as a single statistical unit.

**1.3 Offspring behavioral testing**

The same testing order was always applied to each animal, with 3 to 4 testing-free resting days being imposed between each test. The behavioral testing was conducted as follows:

*Light Dark box test*

The light dark box test is analysed using 4 identical Multi Conditioning boxes (Multi Conditioning System, Germany) each with a dark (1 Lux) and a bright (100 Lux) chamber, separated from each other by a dark plexiglass wall, within which there is an electrically controlled door. Each mouse is placed in the dark compartment. After 5 seconds the door automatically opens, allowing access to both the dark and bright compartment for 5 minutes. The measurements collected from this test include the latency to move into the bright compartment from the dark compartment and the total time spent in each compartment.

*Open-field test*

The open-field test was conducted in 4 identical open-field arenas (40 × 40 × 35-cm high) made of white plastic as similarly described in3,4. They were located in a testing room under dim diffused lighting (approximately 35 lux as measured in the center of the arenas). A digital camera was mounted directly above the 4 arenas. Images were captured at a rate of 5 Hz and transmitted to a PC running the Ethovision (Noldus, Wageningen, The Netherlands) tracking system to record locomotor activity indexed by the distance moved in the entire open field arena. The animals were placed into the center of the open field arena and allowed to explore freely for 30 min. At the end of this time period, the animals were removed from the apparatus and returned to their home cage.

*Y-maze-Novel arm recognition*

Y-maze-novel arm recognition was assessed by analysing the relative exploration time between a novel arm and a familiar arms of the y-maze. The test apparatus was made of Plexiglas and consisted of three identical arms (50 cm × 9 cm; length × width) surrounded by 10-cm high Plexiglas walls. The three arms radiated from a central triangle (8 cm on each side) and spaced 120° from each other.

During the first phase the mice are placed in the start arm, with one of the other arms blocked entrance using opaque plexiglass divider. The mice are allowed to freely explore two arms of the y-maze for 5 minutes before being removed. After the mice are removed, they are placed back into the transport box for 1 minute, while the plexiglass divider is removed. To start the test trial the mice are gently placed again into the start arm and are left to freely explore the entire y-maze for 5 minutes. The relative time spent in the novel arm was calculated by the formula ([time spent in the novel arm]/[time spent in familiar arm 1 + time spent in familiar arm 2+ time spent in unfamiliar arm]) × 100 and used to compare the relative time spent exploring the novel arm and the familiar arms. The total distance moved during the test was also measured to analyse general exploratory activity. This was achieved by a digital camera mounted above the apparatus, which provided images at a rate of 5 Hz that were transmitted to a PC running the EthoVision tracking system (Noldus, Wageningen, The Netherlands).

*Novelty suppressed feeding test*

The novelty-suppressed feeding (NSF) test was performed after 24 h food deprivation. Each mouse was placed in the centre of a brightly lit (≈ 35 lx) opaque acrylic arena (40 × 40 × 35 cm) that contained a single food pellet on a white-paper-covered Petri dish positioned centrally. Behaviour was video-tracked at 5 Hz with EthoVision. Latency to feed—defined as the time taken to approach the pellet, grasp it with both forepaws while seated on the haunches, and bite—was recorded for up to 600 s; animals that failed to eat within 10 min were assigned the maximum score. After testing, mice were returned to their home cages with ad libitum access to food and water.

**1.4 Perfusion and brain extraction for ex-vivo structural MRI imaging**

Each animal was perfused with 30 ml RT 1X PBS + 1μl/ml heparin at a flow rate of 1.0 ml/min, followed by 30 ml 4% PFA RT at a flow rate of 1.0 ml/min. After fixation, the head was removed from the body and the skin was removed from the head, with the brain remaining in the skull. The skull structure was then placed in 4% PFA overnight at 4°C. The next day, each specimen was transferred into 1X PBS + 0.02% sodium azide at 4°C. The skulls were then stripped of soft tissue and the lower jaws removed before being stored in a 2 mM solution of Gadovist (Bayer AG), a gadolinium-based MRI contrast agent, in PBS + 0.05% sodium azide for 16-21 days before MRI scanning. The samples were scanned four at a time, securely positioned by a custom 3D printed holder inside a 50-ml Falcon tube filled with perfluoropolyether (Galden® SV80, Apollo Scientific).

**1.5 MRI acquisition and statistical analysis**

 A T2w anatomical image was acquired using a 3D rapid acquisition with relaxation enhancement (RARE) sequence with the following parameters: effective echo time (TE) = 28 ms, repetition time (TR) = 300 ms, RARE factor = 4, readout bandwidth (BW) = 50 kHz, matrix size = 320×320×240, field-of-view (FOV) = 25.6×25.6×19.2 mm, 80-μm isotropic resolution, 4 averages, scan time = 7 h 40 m 48 s.

**MRI processing:**

Study-specific templates were generated from the T2w images of 31 study subjects using the *antsMultivariateTemplateConstruction2.sh* script in Advanced Normalization Tools (ANTs version 2.4.0)5​. The template and individual subject images were skull-stripped using an atlas-based brain extraction approach ​(MacNicol et al., 2021)​ with the Dorr atlas template as the target image6​. Then, each subject was normalized to the study-specific template, and the study-specific template to the Allen Mouse Brain Common Coordinate Framework (CCFv3)7, via sequential rigid-body, affine, and SyN diffeomorphic registrations using the *antsRegistration* command.

**Volumetric analysis: tensor-based morphometry**

After image registration and careful checking of each individual subject’s alignment to the study-specific template (none were excluded), the *CreateJacobianDeterminantImage* command was used to compute log-transformed Jacobian determinant maps from these transformations to assess voxel-wise local differences in brain volume. FSL randomise was used to perform individual permutation tests to compare local volume changes in a voxelwise manner, between the CSIR and control groups8. Ten-thousand permutations were performed with threshold-free cluster enhancement (TFCE), and the family-wise error rate (FWER) was controlled to correct for multiple comparisons.

**Volumetric Analysis: atlas-based segmentation**

Seventy-two regions of interest (ROIs) derived from the Allen Mouse Brain Atlas (Bogado-Lopes et al. eLife 2025 PMID 36645260) were transformed from CCFv3 space to the study-specific template. For each subject, regional volumes were computed by summing the Jacobian determinant values within each ROI. Total brain volume (mm3) was calculated from the summation of each individual atlas ROI volume, and relative volume for each region calculated as a percentage of total brain volume9,10. Group and sex level differences in total brain volume (mm3) and the relative volume (%) of each individual ROI were assessed using parametric two-way analysis of variance (ANOVA). The resulting p(ANOVA) values were then corrected for multiple comparisons to account for Type I errors across the 72 individual ROIs using the false-discovery rate (FDR) correction. A threshold of 5% FDR (q < 0.05) was considered statistically significant, and post hoc comparison tests were carried out using the Benjamini-Hochberg method. Effect sizes for each test were also calculated using partial eta squared (η2). Correlations of selected relative regional volumes with behavior at the group and sex level were assessed by Pearson’s correlation. All these analyses were performed using R (version 4.3.2) and RStudio (version 2023.09.1+494).

**Sparse Partial Least Squares Analysis:**

To explicitly examine brain-behaviour relationships between offspring neuroanatomy and behavioral metrics, a sparse partial least squares (sPLS) analysis was applied, following previous studies11,12. As a multivariate approach, sPLS identifies the optimal weighted linear combinations of variables from two datasets that exhibit maximal covariance. In this study, the datasets comprised the N=72 relative regional brain volumes from offspring structural MRI (the "brain matrix") and N=10 behavioral metrics from light/dark and open field tests, along with sex and cluster group (the "behavior matrix"). The behavior matrix was z-scored and correlated with the brain matrix to create a brain-behavior covariance matrix. Singular value decomposition (SVD) was then applied to identify orthogonal latent variables (LVs) describing covariation patterns between the brain and behavior matrices. To assess the significance and stability of LVs, permutation testing and bootstrap resampling were performed, considering an LV significant if p < 0.05. Finally, each individual offspring’s brain and behavior scores were evaluated by two-way ANOVA for group and sex effects, followed by linear regression analysis to examine the relationship between these scores.

**1.6 RNA extraction and mRNA sequencing**

The brains were rapidly extracted from the skull (within < 20 s) and placed on an ice-chilled plate. Coronal sections were prepared using razorblade cuts along the following coordinates with respect to bregma: anterior–posterior +2.0 to +1.0, +1.0 to 0.0, 0.0 to −1.0, −1.0 to −2.0, and −2.0 to −3.0 mm. Discrete brain regions were then collected using a micropunch needle (1 mm in diameter) generating micropunches of distinct brain areas as described previously13. The Thal was chosen based on relative volumentric differences between SIR and GRP offspring uncovered by the ex-vivo MRI imaging. Total DNA and RNA were isolated using the Qiagen AllPrep DNA and RNA Mini kit (Qiagen, Switzerland). RNA integrity and amount were determined using a Bioanalyzer (Agilent). Only samples with an RNA integrity number > 8 were further processed and included in the analysis. The Illumina stranded mRNA (Illumina) library preparation kit was used to produce library constructs. In brief, 500ng of total RNA per sample was polyA enriched, fragmented and reverse transcribed into double-stranded cDNA and ligated with adapters. PCR was performed to selectively enrich for fragments containing adapters on both ends. Quality and quantity of enriched libraries were analyzed using Bioanalyzer 2100 (Agilent Technologies) with DNA-specific chip. The DNA library contained fragments in the size range of 100-400 base pairs (bp) with a mean fragment size of approximately 260 bp. Diluted libraries (10 nm) were pooled and sequenced on an Illumina Novaseq X Plus to an average depth of ~20 million 150 bp paired end reads per sample.

**2.10 Statistical and Bioinformatic Analyses**

Group and sex level differences in behavior outcomes were assessed using parametric two-way analysis of variance (ANOVA). The resulting p(ANOVA) values were then corrected for multiple comparisons to account for Type I errors across the 72 individual ROIs using the false-discovery rate (FDR) correction. A threshold of 5% FDR (q < 0.05) was considered statistically significant.

2.10.1 Bioinformatic analyses

Reads were quality-checked using FastQC. Low-quality ends were clipped (5’: 4 bases; 3’: 4 bases) and sequencing adaptors removed using Fastp. Trimmed reads were mapped to the mouse genome (GRCm39 release M31-2023-01-30) and gene-level quantifications were calculated with Kallisto using the SUSHI data analysis framework. Quality control metrics were calculated on BAM files with SUSHI. Differential expression was computed for pairwise comparisons using the Bioconductor package DESeq2 with false discovery rate (FDR)-corrected p-values (p < 0.05) set to a 5% threshold (q < 0.05). Functional network prediction was generated through the use of QIAGEN’s Ingenuity Pathway Analysis (IPA, QIAGEN Redwood City). IPA uses the curated Ingenuity Knowledge Base to identify the involvement of differentially expressed genes in specific diseases and cellular pathways, and to establish functional networks of direct and indirect interactions between differentially expressed genes based on a functional analysis algorithm. For IPA, we used the differentially expressed genes identified by the Bioconductor package DESeq2 with q-values (q < 0.05) as describe above. When considering networks and pathways, entities not associated with the central nervous system were excluded.

**2 Supplementary Results**

**2.1 Additional comparison analyses**

We performed a comparison analysis in the ‘Disease and Functions’ module of IPA, to understand how the observed transcriptomic changes could associate with the behavioral differences occurring in offspring born to GRP or SIR mothers. We focused on three main entities in the module, namely ‘behavior’, ‘nervous system development and function’ and ‘molecular and cellular functions’. When considering the entities relating to ‘molecular and cellular functions’, males displayed, among others, activation of pathways relating to mRNA and protein expression and translation, while formation and assembly of cellular and intercellular junctions was inhibited in both sexes, among others.

**Supplementary Figure S1. Transcriptomic signatures of altered molecular and cellular functions in offspring of socially isolated (SIR) versus group-reared (GRP) dams - part 1.**

The figure displays differential enrichment scores from the Ingenuity Pathway Analysis (IPA) “Diseases and Functions” module, specifically within the “Molecular and Cellular Functions” category. Analyses were performed separately for male and female offspring (SIR-M vs GRP-M; SIR-F vs GRP-F) and then compared to identify cellular processes influenced by maternal preconceptional stress. The heatmap includes functional annotations with significant activation or inhibition z-scores, encompassing processes such as cytoskeletal organization, vesicle transport, RNA expression, apoptosis, and cell viability. These molecular function alterations provide mechanistic insight into the potential biological basis for the behavioral phenotypes observed in the progeny.

**Supplementary Figure S2. Transcriptomic signatures of altered molecular and cellular functions in offspring of socially isolated (SIR) versus group-reared (GRP) dams - part 2.**

The figure displays differential enrichment scores from the Ingenuity Pathway Analysis (IPA) “Diseases and Functions” module, specifically within the “Molecular and Cellular Functions” category. Analyses were performed separately for male and female offspring (SIR-M vs GRP-M; SIR-F vs GRP-F) and then compared to identify cellular processes influenced by maternal preconceptional stress. The heatmap includes functional annotations with significant activation or inhibition z-scores, encompassing processes such as cytoskeletal organization, vesicle transport, RNA expression, apoptosis, and cell viability. These molecular function alterations provide mechanistic insight into the potential biological basis for the behavioral phenotypes observed in the progeny.

**Bibliography**

1 Meyer, U., Feldon, J., Schedlowski, M. & Yee, B. K. Towards an immuno-precipitated neurodevelopmental animal model of schizophrenia. *Neurosci Biobehav Rev* **29**, 913-947, doi:10.1016/j.neubiorev.2004.10.012 (2005).

2 Mueller, F. S., Polesel, M., Richetto, J., Meyer, U. & Weber-Stadlbauer, U. Mouse models of maternal immune activation: Mind your caging system! *Brain Behav Immun* **73**, 643-660, doi:10.1016/j.bbi.2018.07.014 (2018).

3 Meyer, U., Nyffeler, M., Schwendener, S., Knuesel, I., Yee, B. K. & Feldon, J. Relative prenatal and postnatal maternal contributions to schizophrenia-related neurochemical dysfunction after in utero immune challenge. *Neuropsychopharmacology* **33**, 441-456, doi:10.1038/sj.npp.1301413 (2008).

4 Meyer, U., Nyffeler, M., Yee, B. K., Knuesel, I. & Feldon, J. Adult brain and behavioral pathological markers of prenatal immune challenge during early/middle and late fetal development in mice. *Brain Behav Immun* **22**, 469-486, doi:10.1016/j.bbi.2007.09.012 (2008).

5 Avants, B. B., Tustison, N. J., Song, G., Cook, P. A., Klein, A. & Gee, J. C. A reproducible evaluation of ANTs similarity metric performance in brain image registration. *Neuroimage* **54**, 2033-2044, doi:10.1016/j.neuroimage.2010.09.025 (2011).

6 Dorr, A. E., Lerch, J. P., Spring, S., Kabani, N. & Henkelman, R. M. High resolution three-dimensional brain atlas using an average magnetic resonance image of 40 adult C57Bl/6J mice. *Neuroimage* **42**, 60-69, doi:10.1016/j.neuroimage.2008.03.037 (2008).

7 Wang, Q., Ding, S. L., Li, Y., Royall, J., Feng, D., Lesnar, P., Graddis, N., Naeemi, M., Facer, B., Ho, A., Dolbeare, T., Blanchard, B., Dee, N., Wakeman, W., Hirokawa, K. E., Szafer, A., Sunkin, S. M., Oh, S. W., Bernard, A., Phillips, J. W., Hawrylycz, M., Koch, C., Zeng, H., Harris, J. A. & Ng, L. The Allen Mouse Brain Common Coordinate Framework: A 3D Reference Atlas. *Cell* **181**, 936-953 e920, doi:10.1016/j.cell.2020.04.007 (2020).

8 Winkler, A. M., Ridgway, G. R., Webster, M. A., Smith, S. M. & Nichols, T. E. Permutation inference for the general linear model. *Neuroimage* **92**, 381-397, doi:10.1016/j.neuroimage.2014.01.060 (2014).

9 Doostdar, N., Kim, E., Grayson, B., Harte, M. K., Neill, J. C. & Vernon, A. C. Global brain volume reductions in a sub-chronic phencyclidine animal model for schizophrenia and their relationship to recognition memory. *J Psychopharmacol* **33**, 1274-1287, doi:10.1177/0269881119844196 (2019).

10 Mueller, F. S., Scarborough, J., Schalbetter, S. M., Richetto, J., Kim, E., Couch, A., Yee, Y., Lerch, J. P., Vernon, A. C., Weber-Stadlbauer, U. & Meyer, U. Behavioral, neuroanatomical, and molecular correlates of resilience and susceptibility to maternal immune activation. *Mol Psychiatry*, doi:10.1038/s41380-020-00952-8 (2020).

11 Guma, E., Bordignon, P. D. C., Devenyi, G. A., Gallino, D., Anastassiadis, C., Cvetkovska, V., Barry, A. D., Snook, E., Germann, J., Greenwood, C. M. T., Misic, B., Bagot, R. C. & Chakravarty, M. M. Early or Late Gestational Exposure to Maternal Immune Activation Alters Neurodevelopmental Trajectories in Mice: An Integrated Neuroimaging, Behavioral, and Transcriptional Study. *Biol Psychiatry* **90**, 328-341, doi:10.1016/j.biopsych.2021.03.017 (2021).

12 Guma, E., Snook, E., Spring, S., Lerch, J. P., Nieman, B. J., Devenyi, G. A. & Chakravarty, M. M. Subtle alterations in neonatal neurodevelopment following early or late exposure to prenatal maternal immune activation in mice. *Neuroimage Clin* **32**, 102868, doi:10.1016/j.nicl.2021.102868 (2021).

13 Weber-Stadlbauer, U., Richetto, J., Labouesse, M. A., Bohacek, J., Mansuy, I. M. & Meyer, U. Transgenerational transmission and modification of pathological traits induced by prenatal immune activation. *Mol Psychiatry* **22**, 102-112, doi:10.1038/mp.2016.41 (2017).
