# Supplementary material for: Structural Magnetic Resonance Imaging and Genome-Wide Transcriptional Profiling Reveal Intergenerational Vulnerability in a Mouse Model of Preconceptional Stress
Source: Research Square preprint supplement (doi:10.21203/rs.3.rs-7535749/v1), 2025-10-01
Supplement: Supplementary file 2 [file 587a281331750dc8d1e07c21.xlsx]

## Sheet: Sheet1
gene_id	transcript_id	gene_name	type	biotypes	description	gc	featWidth	GO BP	GO MF	GO CC	hgnc_symbol	entrez_id	isPresent	log2 Ratio	pValue	fdr	seqnames
ENSMUSG00000050558	ENSMUST00000110157; ENSMUST00000049997; ENSMUST00000142766; ENSMUST00000110156; ENSMUST00000145995	Prokr2	protein_coding	protein_coding	prokineticin receptor 2 [Source:MGI Symbol;Acc:MGI:2181363]	0.4784	3319	GO:0007186; GO:0007165; GO:0007218; GO:0007623	GO:0004930; GO:0004983	GO:0016021; GO:0016020; GO:0005886; GO:0005887	PROKR2	246313	TRUE	1.62935	1.92322e-15	2.81309e-11	chr2
ENSMUSG00000041703	ENSMUST00000039118; ENSMUST00000143084	Zic5	protein_coding	protein_coding	zinc finger protein of the cerebellum 5 [Source:MGI Symbol;Acc:MGI:1929518]	0.498	2736		GO:0003677; GO:0046872; GO:0000977; GO:1990837	GO:0005634	ZIC5	65100	TRUE	1.47941	2.02987e-14	1.06557e-10	chr14
ENSMUSG00000068696	ENSMUST00000090473; ENSMUST00000197759; ENSMUST00000199128	Gpr88	protein_coding	protein_coding	G-protein coupled receptor 88 [Source:MGI Symbol;Acc:MGI:1927653]	0.5736	1359	GO:0007186; GO:0007626; GO:0007165; GO:0050885; GO:0019228; GO:0007602; GO:0009584; GO:0071482; GO:0061743	GO:0004930; GO:0003774; GO:0004888; GO:0008020	GO:0016021; GO:0005634; GO:0005737; GO:0016020; GO:0005886; GO:0005887; GO:0005929	GPR88	64378	TRUE	-1.08404	2.59629e-14	1.06557e-10	chr3
ENSMUSG00000028023	ENSMUST00000174661; ENSMUST00000029657; ENSMUST00000106382; ENSMUST00000173645; ENSMUST00000172645; ENSMUST00000187145; ENSMUST00000042587; ENSMUST00000174623	Pitx2	protein_coding	protein_coding	paired-like homeodomain transcription factor 2 [Source:MGI Symbol;Acc:MGI:109340]	0.5529	1679	GO:0006355; GO:0001701; GO:0030324; GO:0016055; GO:0045944; GO:0060412; GO:0000122; GO:0006357; GO:0042476; GO:0007507; GO:0007519; GO:0042127; GO:0043010; GO:0045893; GO:0001570; GO:0001764; GO:0048738; GO:0009653; GO:0007368; GO:0035116; GO:0055007; GO:0009887; GO:0043388; GO:0031076; GO:0030334; GO:0021983; GO:0048557; GO:0070986; GO:0048536; GO:0060971; GO:0002074; GO:0001569; GO:0035886; GO:…	GO:0003677; GO:0000981; GO:0043565; GO:0005515; GO:0000978; GO:0003682; GO:0000976; GO:0003700; GO:0001228; GO:0042802; GO:0042803; GO:1990837; GO:0001227; GO:0061629; GO:0140297; GO:0031490; GO:0051219	GO:0005634; GO:0005737; GO:0005654; GO:0005667	PITX2	18741	TRUE	-5.75487	2.91397e-14	1.06557e-10	chr3
ENSMUSG00000026883	ENSMUST00000112986; ENSMUST00000112987; ENSMUST00000135741; ENSMUST00000145698; ENSMUST00000091010; ENSMUST00000112992; ENSMUST00000156465; ENSMUST00000112981; ENSMUST00000138957; ENSMUST00000065001; ENSMUST00000124098; ENSMUST00000112983; ENSMUST00000156669	Dab2ip	protein_coding	protein_coding	disabled 2 interacting protein [Source:MGI Symbol;Acc:MGI:1916851]	0.5941	4851	GO:0043087; GO:0071222; GO:0045944; GO:0071356; GO:0000122; GO:0051726; GO:0016525; GO:0008285; GO:0035148; GO:0001933; GO:0050680; GO:0007165; GO:0002376; GO:0006986; GO:0007049; GO:0006954; GO:0045087; GO:0043410; GO:0006915; GO:0045892; GO:0070373; GO:0045732; GO:0001525; GO:0030163; GO:0031334; GO:0042177; GO:0043254; GO:0071902; GO:0043065; GO:0048812; GO:0043124; GO:0071364; GO:0032088; GO:…	GO:0005515; GO:0044877; GO:0005096; GO:0017124; GO:0042802; GO:0042803; GO:0019900; GO:0032266; GO:0070273; GO:0019901; GO:0043539; GO:0071889; GO:0047485; GO:0051721; GO:0035591; GO:0005123; GO:0031435; GO:0043548; GO:0043184; GO:0031434; GO:0036312	GO:0005737; GO:0016020; GO:0005886; GO:0042995; GO:0030425; GO:0030424; GO:0043025; GO:0030139; GO:0032809; GO:0044300; GO:0044301; GO:1990032; GO:1990597	DAB2IP	69601	TRUE	0.253935	3.88301e-14	1.13594e-10	chr2
ENSMUSG00000023192	ENSMUST00000200826; ENSMUST00000023959; ENSMUST00000201681; ENSMUST00000201955	Grm2	protein_coding	protein_coding	glutamate receptor, metabotropic 2 [Source:MGI Symbol;Acc:MGI:1351339]	0.5781	2363	GO:0007186; GO:0007165; GO:0007154; GO:0023052; GO:0010467; GO:0042220; GO:0007196; GO:0014047; GO:0051966; GO:0090461; GO:0060292; GO:0014048; GO:0014059; GO:0035095; GO:0051896; GO:0007216; GO:2001023	GO:0004930; GO:0097110; GO:0005246; GO:0001640; GO:0001641	GO:0016021; GO:0016020; GO:0005886; GO:0030424; GO:0005887; GO:0045202; GO:0042995; GO:0030425; GO:0043005; GO:0099055; GO:0042734; GO:0097449	GRM2	108068	TRUE	0.778395	1.67101e-13	4.07364e-10	chr9
ENSMUSG00000006369	ENSMUST00000057410; ENSMUST00000109432; ENSMUST00000160798	Fbln1	protein_coding	protein_coding	fibulin 1 [Source:MGI Symbol;Acc:MGI:95487]	0.557	2111	GO:0010628; GO:0048146; GO:0001933; GO:0010952; GO:1900025; GO:2000146; GO:0070373; GO:0030198; GO:0007162; GO:2000647; GO:0007566; GO:0072378; GO:0071635; GO:1904237; GO:1904188	GO:0005509; GO:0005515; GO:0044877; GO:0042802; GO:0016504; GO:0005178; GO:0008022; GO:0005201; GO:0001968; GO:0070051	GO:0005576; GO:0005615; GO:0031012; GO:0005604; GO:0062023; GO:0071953	FBLN1	14114	TRUE	0.979923	3.23467e-13	6.75907e-10	chr15
ENSMUSG00000026686	ENSMUST00000111377; ENSMUST00000028003	Lmx1a	protein_coding	protein_coding	LIM homeobox transcription factor 1 alpha [Source:MGI Symbol;Acc:MGI:1888519]	0.4944	3274	GO:0006355; GO:0010468; GO:0007417; GO:0030182; GO:0006357; GO:0048731; GO:0007420; GO:0001558; GO:0071542; GO:0045665; GO:0021549; GO:0021766; GO:0030901; GO:0007411; GO:0021953; GO:0045944; GO:1904948; GO:0021542; GO:0007613; GO:0090263; GO:1905426; GO:0007626; GO:0042048; GO:0050808	GO:0003677; GO:0000981; GO:0046872; GO:0000977; GO:1990837; GO:0001228	GO:0005634	LMX1A	110648	TRUE	-4.21522	9.80354e-13	1.79246e-09	chr1
ENSMUSG00000020723	ENSMUST00000021066; ENSMUST00000134076	Cacng4	protein_coding	protein_coding	calcium channel, voltage-dependent, gamma subunit 4 [Source:MGI Symbol;Acc:MGI:1859167]	0.536	1961	GO:0006811; GO:0034765; GO:0006816; GO:0070588; GO:0042220; GO:2000311; GO:2000969; GO:0019226; GO:0098943; GO:0051968; GO:0098962; GO:0098970; GO:0099590	GO:0005244; GO:0005245; GO:0005262; GO:0005246; GO:0035255; GO:0016247	GO:0016021; GO:0014069; GO:0016020; GO:0005886; GO:0009986; GO:0005891; GO:0098978; GO:0099061; GO:0044297; GO:0032281; GO:0098839; GO:1990454; GO:0036477	CACNG4	54377	TRUE	0.279498	1.6533e-12	2.68698e-09	chr11
ENSMUSG00000032224	ENSMUST00000034749; ENSMUST00000145427; ENSMUST00000123206; ENSMUST00000141775	Fam81a	protein_coding	protein_coding	family with sequence similarity 81, member A [Source:MGI Symbol;Acc:MGI:1924136]	0.4978	1289	GO:0008150	GO:0003674	GO:0005575	FAM81A	76886	TRUE	0.777282	6.35536e-12	9.29598e-09	chr9
ENSMUSG00000028736	ENSMUST00000030508; ENSMUST00000174681	Pax7	protein_coding	protein_coding	paired box 7 [Source:MGI Symbol;Acc:MGI:97491]	0.582	3790	GO:0006355; GO:0045944; GO:0010468; GO:0051216; GO:0006366; GO:0007519; GO:0006357; GO:0048513; GO:0006338; GO:0048663; GO:0007517; GO:0048706; GO:0009887; GO:0010453; GO:0043403; GO:0048856; GO:0031062; GO:0021904; GO:2000288; GO:0051101; GO:0021527; GO:0060415; GO:0014813	GO:0003677; GO:0000981; GO:0043565; GO:0005515; GO:0000978; GO:0003700; GO:1990837	GO:0005634; GO:0005667	PAX7	18509	TRUE	-5.56219	1.47947e-11	1.96729e-08	chr4
ENSMUSG00000043857	ENSMUST00000103027; ENSMUST00000139905; ENSMUST00000136584; ENSMUST00000126757	Mgat5b	protein_coding	protein_coding	mannoside acetylglucosaminyltransferase 5, isoenzyme B [Source:MGI Symbol;Acc:MGI:3606200]	0.5898	2048	GO:0006487; GO:0006486; GO:0018242	GO:0030144; GO:0016740; GO:0016757; GO:0046872; GO:0030145	GO:0016020; GO:0016021; GO:0000139; GO:0005794	MGAT5B	268510	TRUE	0.465989	6.44511e-11	7.85606e-08	chr11
ENSMUSG00000041986	ENSMUST00000215313; ENSMUST00000166580; ENSMUST00000048409; ENSMUST00000216880; ENSMUST00000213111	Elmod1	protein_coding	protein_coding	ELMO/CED-12 domain containing 1 [Source:MGI Symbol;Acc:MGI:3583900]	0.4295	1833	GO:0043547	GO:0005096		ELMOD1	270162	TRUE	-0.364252	7.31946e-11	8.23552e-08	chr9
ENSMUSG00000019230	ENSMUST00000019374; ENSMUST00000093486; ENSMUST00000112030; ENSMUST00000046870; ENSMUST00000112026; ENSMUST00000192425; ENSMUST00000194557	Lhx9	protein_coding	protein_coding	LIM homeobox protein 9 [Source:MGI Symbol;Acc:MGI:1316721]	0.4468	3262	GO:0008283; GO:0006355; GO:0006357; GO:0048731; GO:0045892; GO:0030182; GO:0008584; GO:0008585; GO:0035262; GO:0097380	GO:0003677; GO:0005515; GO:0046872; GO:0000981; GO:0000977; GO:1990837	GO:0005634	LHX9	16876	TRUE	0.717544	1.03683e-10	1.08326e-07	chr1
ENSMUSG00000041272	ENSMUST00000039987; ENSMUST00000125974; ENSMUST00000147657; ENSMUST00000150082	Tox	protein_coding	protein_coding	thymocyte selection-associated high mobility group box [Source:MGI Symbol;Acc:MGI:2181659]	0.452	2327	GO:0006357; GO:0007399; GO:0006325; GO:0021895; GO:0010976; GO:1901537; GO:0001779; GO:0048535; GO:0048541; GO:0002362; GO:0043373; GO:2000179; GO:0030098; GO:0032825; GO:1902232; GO:0002364; GO:0002521; GO:0043375	GO:0003677; GO:0031490	GO:0005634	TOX	252838	TRUE	0.593772	1.54737e-10	1.50719e-07	chr4
ENSMUSG00000040147	ENSMUST00000040820; ENSMUST00000168613; ENSMUST00000163344; ENSMUST00000173143	Maob	protein_coding	protein_coding	monoamine oxidase B [Source:MGI Symbol;Acc:MGI:96916]	0.4573	1389	GO:1901564; GO:0045964; GO:0014063; GO:0009410; GO:0009636; GO:0010044; GO:0010269; GO:0032496; GO:0042135; GO:0045471; GO:0048545; GO:0051412	GO:0016491; GO:0042802; GO:0050660; GO:0008131; GO:0052595; GO:0052596; GO:0097621	GO:0005739; GO:0016020; GO:0016021; GO:0005743; GO:0005741	MAOB	109731	TRUE	0.533025	1.70903e-10	1.50719e-07	chrX
ENSMUSG00000029093	ENSMUST00000037370; ENSMUST00000137040; ENSMUST00000135324; ENSMUST00000070720; ENSMUST00000141508	Sorcs2	protein_coding	protein_coding	sortilin-related VPS10 domain containing receptor 2 [Source:MGI Symbol;Acc:MGI:1932289]	0.5497	2358	GO:0006886; GO:0060292	GO:0005515	GO:0005829; GO:0016020; GO:0016021; GO:0005886; GO:0031410; GO:0043231; GO:0045202; GO:0045211; GO:0030659; GO:0042995; GO:0030425; GO:0043204; GO:0098839; GO:0043005; GO:0005768; GO:0014069; GO:0005887; GO:0031901; GO:0043197; GO:0055038	SORCS2	81840	TRUE	0.342352	1.75171e-10	1.50719e-07	chr5
ENSMUSG00000061524	ENSMUST00000075888; ENSMUST00000137059	Zic2	protein_coding	protein_coding	zinc finger protein of the cerebellum 2 [Source:MGI Symbol;Acc:MGI:106679]	0.5689	1602		GO:0003677; GO:0046872; GO:0000977	GO:0005634; GO:0005654; GO:0016604	ZIC2	22772	TRUE	0.649473	1.88054e-10	1.52814e-07	chr14
ENSMUSG00000026156	ENSMUST00000144602; ENSMUST00000063663; ENSMUST00000140583	B3gat2	protein_coding	protein_coding	beta-1,3-glucuronyltransferase 2 (glucuronosyltransferase S) [Source:MGI Symbol;Acc:MGI:2389490]	0.5499	2960	GO:0006486; GO:0005975; GO:0050650; GO:0016051	GO:0015018; GO:0016740; GO:0046872	GO:0016020; GO:0000139; GO:0005794; GO:0016021	B3GAT2	280645	TRUE	0.318483	2.53657e-10	1.95276e-07	chr1
ENSMUSG00000071234	ENSMUST00000095550; ENSMUST00000222422; ENSMUST00000221905; ENSMUST00000221793	Syndig1l	protein_coding	protein_coding	synapse differentiation inducing 1 like [Source:MGI Symbol;Acc:MGI:2685107]	0.6143	1300	GO:0008150	GO:0003674	GO:0016021; GO:0016020; GO:0005794; GO:0043231	SYNDIG1L	627191	TRUE	0.592221	2.71788e-10	1.98772e-07	chr12
ENSMUSG00000054008	ENSMUST00000235795; ENSMUST00000237783; ENSMUST00000169273; ENSMUST00000237572; ENSMUST00000237885; ENSMUST00000237070	Ndst1	protein_coding	protein_coding	N-deacetylase/N-sulfotransferase (heparan glucosaminyl) 1 [Source:MGI Symbol;Acc:MGI:104719]	0.5621	3273	GO:0007507; GO:0008283; GO:0008152; GO:0006954; GO:0043410; GO:0003279; GO:0035904; GO:0060976; GO:0048702; GO:0008543; GO:0030900; GO:0045880; GO:0009887; GO:0015012; GO:0030210; GO:0030203; GO:0030901; GO:0006476; GO:0007585; GO:0048703; GO:0015014; GO:0000271; GO:0006477	GO:0016787; GO:0015016; GO:0008146; GO:0016740; GO:0003824; GO:0005515; GO:0019213; GO:0050119; GO:0102140	GO:0016020; GO:0016021; GO:0000139; GO:0005794; GO:0032588	NDST1	15531	TRUE	0.221774	3.1885e-10	2.22086e-07	chr18
ENSMUSG00000026167	ENSMUST00000006718; ENSMUST00000187238	Wnt10a	protein_coding	protein_coding	wingless-type MMTV integration site family, member 10A [Source:MGI Symbol;Acc:MGI:108071]	0.6498	1552	GO:0007275; GO:0016055; GO:0010628; GO:0060070; GO:0042476; GO:0043588; GO:0001942; GO:0009887; GO:0030182; GO:0007165; GO:0043586; GO:0045165; GO:0007267; GO:0031069; GO:0048730; GO:0042487; GO:0014033; GO:0048733; GO:0071560	GO:0005102; GO:0005125; GO:0048018; GO:0005109	GO:0005576; GO:0005615	WNT10A	22409	TRUE	1.33258	3.64261e-10	2.42184e-07	chr1
ENSMUSG00000025790	ENSMUST00000098371; ENSMUST00000026897; ENSMUST00000107453; ENSMUST00000142175; ENSMUST00000134539; ENSMUST00000136389; ENSMUST00000138099; ENSMUST00000129292	Slco3a1	protein_coding	protein_coding	solute carrier organic anion transporter family, member 3a1 [Source:MGI Symbol;Acc:MGI:1351867]	0.5426	1766	GO:0055085; GO:0006811; GO:0043252; GO:0051092; GO:0001934; GO:0015732	GO:0005515; GO:0015347; GO:0008514; GO:0015132; GO:0022857	GO:0016020; GO:0016021; GO:0005886; GO:0005887	SLCO3A1	108116	TRUE	-0.37541	4.50822e-10	2.86703e-07	chr7
ENSMUSG00000032232	ENSMUST00000121322; ENSMUST00000072899; ENSMUST00000152224; ENSMUST00000122065; ENSMUST00000136044; ENSMUST00000146567	Cgnl1	protein_coding	protein_coding	cingulin-like 1 [Source:MGI Symbol;Acc:MGI:1915428]	0.5403	3319	GO:0007015; GO:0051058; GO:0051497; GO:0150105		GO:0016459; GO:0032991	CGNL1	68178	TRUE	-0.390115	5.07506e-10	3.09304e-07	chr9
ENSMUSG00000021186	ENSMUST00000021603; ENSMUST00000222587; ENSMUST00000221373	Fbln5	protein_coding	protein_coding	fibulin 5 [Source:MGI Symbol;Acc:MGI:1346091]	0.4782	3331	GO:0007155; GO:0048251; GO:0030198; GO:2000121; GO:0046903; GO:0016525; GO:0045944; GO:0034394; GO:0000122; GO:0033690; GO:0098867; GO:0001558	GO:0005509; GO:0005515; GO:0042803; GO:0008022; GO:0005178; GO:0030023	GO:0005615; GO:0005576; GO:0062023; GO:0071953	FBLN5	23876	TRUE	0.431638	5.48767e-10	3.21073e-07	chr12
ENSMUSG00000021379	ENSMUST00000021810	Id4	protein_coding	protein_coding	inhibitor of DNA binding 4 [Source:MGI Symbol;Acc:MGI:99414]	0.4258	3849	GO:0010628; GO:0045944; GO:0045599; GO:2000648; GO:0000122; GO:0072089; GO:0001649; GO:0008283; GO:0048709; GO:0030182; GO:0045892; GO:0000082; GO:0030154; GO:0008104; GO:0007420; GO:0007623; GO:0048708; GO:0021895; GO:0002052; GO:0007405; GO:0045665; GO:0045444; GO:0021766; GO:0022010; GO:0048715; GO:0060740; GO:0032922; GO:0048712; GO:0060741; GO:0060512; GO:0061682	GO:0046983; GO:0005515; GO:0061629; GO:0140416	GO:0005634; GO:0005737; GO:0005654	ID4	15904	TRUE	0.594413	6.34447e-10	3.45033e-07	chr13
ENSMUSG00000003657	ENSMUST00000212297; ENSMUST00000003754	Calb2	protein_coding	protein_coding	calbindin 2 [Source:MGI Symbol;Acc:MGI:101914]	0.5214	1256	GO:0051480; GO:0099509; GO:1900271	GO:0005509; GO:0046872; GO:0099534	GO:0005634; GO:0005829; GO:0005737; GO:0043005; GO:0045202; GO:0030425; GO:0098688; GO:0097060; GO:0032437; GO:0032420; GO:0043195; GO:0005921	CALB2	12308	TRUE	0.710539	6.36896e-10	3.45033e-07	chr8
ENSMUSG00000018166	ENSMUST00000082059	Erbb3	protein_coding	protein_coding	erb-b2 receptor tyrosine kinase 3 [Source:MGI Symbol;Acc:MGI:95411]	0.512	6016	GO:0006468; GO:0010628; GO:0043524; GO:0051402; GO:0042127; GO:0016310; GO:0007399; GO:0050896; GO:0007169; GO:0097192; GO:0008284; GO:0048513; GO:0007422; GO:0014037; GO:0038133; GO:0051048; GO:0070886; GO:0007165; GO:0007162; GO:0046326; GO:0021545; GO:0097049; GO:0014065; GO:0007173; GO:0061098; GO:0009968; GO:0033674; GO:0003197; GO:2000672; GO:0055025	GO:0005524; GO:0004672; GO:0016740; GO:0038023; GO:0000166; GO:0016301; GO:0005515; GO:0042802; GO:0030296; GO:0043125; GO:0046982; GO:0038132; GO:0031625; GO:0004888; GO:0019838; GO:0038131	GO:0005634; GO:0016020; GO:0016021; GO:0005615; GO:0005887; GO:0016324; GO:0016328; GO:0098590; GO:0016323; GO:0043235; GO:0045211; GO:0044214; GO:0009925; GO:0038143	ERBB3	13867	TRUE	-0.346286	6.97243e-10	3.64235e-07	chr10
ENSMUSG00000030089	ENSMUST00000044019; ENSMUST00000032177	Slc41a3	protein_coding	protein_coding	solute carrier family 41, member 3 [Source:MGI Symbol;Acc:MGI:1918949]	0.5558	2368	GO:0006812; GO:0006811; GO:0035725; GO:0030001; GO:0045016	GO:0008324; GO:0015095; GO:0022890; GO:0061768	GO:0016020; GO:0016021; GO:0005886; GO:0005743; GO:0005739	SLC41A3	71699	TRUE	0.700357	9.56724e-10	4.82552e-07	chr6
ENSMUSG00000051354	ENSMUST00000218301; ENSMUST00000164660; ENSMUST00000060716; ENSMUST00000220219; ENSMUST00000219318; ENSMUST00000219738	Samd3	protein_coding	protein_coding	sterile alpha motif domain containing 3 [Source:MGI Symbol;Acc:MGI:2685469]	0.4318	1870	GO:0008150	GO:0005515; GO:0003674	GO:0005575	SAMD3	268288	TRUE	2.55186	1.23407e-09	6.01691e-07	chr10
ENSMUSG00000045515	ENSMUST00000239323; ENSMUST00000054883	Pou3f3	protein_coding	protein_coding	POU domain, class 3, transcription factor 3 [Source:MGI Symbol;Acc:MGI:102564]	0.513	7370	GO:0006355; GO:0010628; GO:0045944; GO:0000122; GO:0006357; GO:0007399; GO:0045893; GO:0045892; GO:0007420; GO:0008284; GO:0001822; GO:0021799; GO:0043066; GO:0021869; GO:0048878; GO:0071918; GO:0072218; GO:0072227; GO:0072233; GO:0072236; GO:0072240	GO:0003677; GO:0003700; GO:0000981; GO:0043565; GO:0000978; GO:0005515; GO:0042803; GO:0071837	GO:0005634; GO:0005654	POU3F3	18993	TRUE	-0.375556	1.33743e-09	6.3105e-07	chr1
ENSMUSG00000066189	ENSMUST00000084615; ENSMUST00000182563; ENSMUST00000182095	Cacng3	protein_coding	protein_coding	calcium channel, voltage-dependent, gamma subunit 3 [Source:MGI Symbol;Acc:MGI:1859165]	0.5346	1485	GO:0006811; GO:0034765; GO:0006816; GO:0070588; GO:0008104; GO:2000311; GO:0098943; GO:0006605; GO:0019226; GO:0051968; GO:0098970; GO:0099590; GO:0099645; GO:2000969	GO:0005244; GO:0005262; GO:0005515; GO:0030165; GO:0035255; GO:0005245; GO:0016247	GO:0016021; GO:0016020; GO:0030425; GO:0098978; GO:0099061; GO:0060076; GO:0098839; GO:0098685; GO:0032281; GO:0036477	CACNG3	54376	TRUE	0.764568	1.57544e-09	7.20125e-07	chr7
ENSMUSG00000020846	ENSMUST00000021207	Rflnb	protein_coding	protein_coding	refilin B [Source:MGI Symbol;Acc:MGI:1923816]	0.5017	3512	GO:0061181; GO:0061572; GO:0001837; GO:0048705; GO:0030036; GO:1900158; GO:0061182	GO:0031005	GO:0005737; GO:0005856; GO:0015629; GO:0032432	RFLNB	76566	TRUE	0.593494	1.67505e-09	7.42452e-07	chr11
ENSMUSG00000002771	ENSMUST00000002848; ENSMUST00000211713; ENSMUST00000211250	Grin2d	protein_coding	protein_coding	glutamate receptor, ionotropic, NMDA2D (epsilon 4) [Source:MGI Symbol;Acc:MGI:95823]	0.6545	3895	GO:0008344; GO:0035249; GO:0006811; GO:0060078; GO:0051930; GO:0019722; GO:0035235; GO:0098655; GO:2000463; GO:0097553; GO:0051968; GO:0001964; GO:0048168; GO:0060291; GO:1904062	GO:0015276; GO:0004970; GO:0038023; GO:0005216; GO:1904315; GO:0005261; GO:0004972; GO:0042165; GO:0022843; GO:0016595; GO:0022849	GO:0016020; GO:0045202; GO:0016021; GO:0005886; GO:0045211; GO:0005887; GO:0098978; GO:0099061; GO:0017146; GO:0098839; GO:0098686	GRIN2D	14814	TRUE	0.418989	2.00436e-09	8.62285e-07	chr7
ENSMUSG00000018012	ENSMUST00000018156; ENSMUST00000142229; ENSMUST00000134322	Rac3	protein_coding	protein_coding	Rac family small GTPase 3 [Source:MGI Symbol;Acc:MGI:2180784]	0.5958	794	GO:0016055; GO:0014041; GO:0048873; GO:0007163; GO:0007264; GO:0030036; GO:0032956; GO:0007015; GO:0031175; GO:0022604; GO:0050885; GO:0008360; GO:1900026; GO:0050905; GO:0033630; GO:0051932; GO:0021894; GO:0030031; GO:0030865	GO:0005525; GO:0003924; GO:0005515; GO:0016787; GO:0000166; GO:0019901; GO:0003925; GO:0048306	GO:0005829; GO:0045202; GO:0005737; GO:0016020; GO:0005886; GO:0071944; GO:0048471; GO:0005938; GO:0005856; GO:0042995; GO:0030027; GO:0043005; GO:0012505; GO:0030426; GO:0043025; GO:0031410; GO:0031941	RAC3	170758	TRUE	0.40364	2.12293e-09	8.87204e-07	chr11
ENSMUSG00000019890	ENSMUST00000020040	Nts	protein_coding	protein_coding	neurotensin [Source:MGI Symbol;Acc:MGI:1328351]	0.3942	1248	GO:0010629; GO:0010628; GO:0051897; GO:0051092; GO:0097746; GO:0008542; GO:0031640; GO:0061844; GO:0007218	GO:0005184; GO:0048018; GO:0071855	GO:0005576; GO:0031410; GO:0043231; GO:0043025; GO:0043679; GO:0030133	NTS	67405	TRUE	-1.65374	2.44648e-09	9.9402e-07	chr10
ENSMUSG00000036306	ENSMUST00000185176; ENSMUST00000037049; ENSMUST00000181890; ENSMUST00000209353; ENSMUST00000184961	Lzts1	protein_coding	protein_coding	leucine zipper, putative tumor suppressor 1 [Source:MGI Symbol;Acc:MGI:2684762]	0.4956	1819	GO:0007049; GO:0048814; GO:0016242; GO:0048167; GO:0044772	GO:0008017	GO:0045202; GO:0014069; GO:0005737; GO:0016020; GO:0005886; GO:0016324; GO:0042995; GO:0043005; GO:0043198; GO:0044297; GO:0043197; GO:0045211	LZTS1	211134	TRUE	-0.360346	3.02414e-09	1.19552e-06	chr8
ENSMUSG00000061436	ENSMUST00000161779; ENSMUST00000160962; ENSMUST00000162359; ENSMUST00000160360; ENSMUST00000159307; ENSMUST00000159894; ENSMUST00000114855	Hipk2	protein_coding	protein_coding	homeodomain interacting protein kinase 2 [Source:MGI Symbol;Acc:MGI:1314872]	0.5149	3209	GO:0006468; GO:0060395; GO:0045944; GO:0008284; GO:0045766; GO:0043524; GO:0030514; GO:0008344; GO:0051402; GO:0007179; GO:0008283; GO:0016310; GO:0006974; GO:0045893; GO:0018108; GO:0001934; GO:0018105; GO:0006915; GO:0000122; GO:0009952; GO:0006978; GO:0007224; GO:0046330; GO:0007628; GO:0030511; GO:0042771; GO:0032092; GO:0051091; GO:0018107; GO:2000059; GO:0010842; GO:0030182; GO:0043388; GO:…	GO:0005524; GO:0004672; GO:0005515; GO:0016740; GO:0000166; GO:0016301; GO:0004674; GO:0106310; GO:0003714; GO:0046332; GO:0003713; GO:0061629; GO:0004713; GO:0046790	GO:0005634; GO:0005737; GO:0016604; GO:0005654; GO:0016605; GO:0010494; GO:0090575	HIPK2	15258	TRUE	-0.273814	5.7809e-09	2.22519e-06	chr6
ENSMUSG00000029154	ENSMUST00000031040; ENSMUST00000065543; ENSMUST00000135820	Cwh43	protein_coding	protein_coding	cell wall biogenesis 43 C-terminal homolog [Source:MGI Symbol;Acc:MGI:2444131]	0.4764	1884	GO:0006506	GO:0003674	GO:0016020; GO:0016021; GO:0005783	CWH43	231293	TRUE	0.997615	6.46399e-09	2.42433e-06	chr5
ENSMUSG00000050963	ENSMUST00000072868; ENSMUST00000228725	Kcns2	protein_coding	protein_coding	K+ voltage-gated channel, subfamily S, 2 [Source:MGI Symbol;Acc:MGI:1197011]	0.473	5181	GO:0055085; GO:0006811; GO:0051260; GO:0006813; GO:0034765; GO:0071805; GO:1902259	GO:0005216; GO:0005244; GO:0005249; GO:0005267	GO:0016020; GO:0016021; GO:0005886; GO:0008076; GO:0048471	KCNS2	16539	TRUE	0.665753	1.28817e-08	4.71052e-06	chr15
ENSMUSG00000036580	ENSMUST00000044116; ENSMUST00000199416; ENSMUST00000107971; ENSMUST00000200658; ENSMUST00000118118; ENSMUST00000117341; ENSMUST00000149767; ENSMUST00000146109	Spg20	protein_coding	protein_coding	spastic paraplegia 20, spartin (Troyer syndrome) homolog (human) [Source:MGI Symbol;Acc:MGI:2139806]	0.4964	2559	GO:0051881; GO:0030509; GO:0030514; GO:0060612; GO:0051301; GO:0050905; GO:0048669; GO:0034389; GO:0009838; GO:0048698	GO:0005515; GO:0031625	GO:0045202; GO:0005829; GO:0005737; GO:0005886; GO:0030496; GO:0005811; GO:0005741		229285	TRUE	-0.251859	1.7665e-08	6.30209e-06	chr3
ENSMUSG00000046447	ENSMUST00000050918	Camk2n1	protein_coding	protein_coding	calcium/calmodulin-dependent protein kinase II inhibitor 1 [Source:MGI Symbol;Acc:MGI:1913509]	0.5371	4444	GO:0055074; GO:0003084; GO:0050729; GO:0035774; GO:0006469; GO:0007616	GO:0004860; GO:0019901; GO:0008427	GO:0045202; GO:0014069; GO:0042995; GO:0030425; GO:0043025	CAMK2N1	66259	TRUE	0.325484	1.84022e-08	6.40878e-06	chr4
ENSMUSG00000058420	ENSMUST00000081574; ENSMUST00000203465; ENSMUST00000203796; ENSMUST00000203485; ENSMUST00000207034; ENSMUST00000207650	Syt17	protein_coding	protein_coding	synaptotagmin XVII [Source:MGI Symbol;Acc:MGI:104966]	0.5428	2060	GO:0030154; GO:0006887; GO:0016192; GO:0014059; GO:0017156; GO:0017158; GO:0071277; GO:1903861	GO:0005509; GO:0001786; GO:0000149; GO:0005544; GO:0030276; GO:0019905	GO:0016020; GO:0005886; GO:0005802; GO:0070382	SYT17	110058	TRUE	0.6792	2.01707e-08	6.86134e-06	chr7
ENSMUSG00000033063	ENSMUST00000091554; ENSMUST00000222618	Cntnap3	protein_coding	protein_coding	contactin associated protein-like 3 [Source:MGI Symbol;Acc:MGI:3588199]	0.4562	3522	GO:0008150; GO:0007155	GO:0003674	GO:0030424; GO:0016020; GO:0016021; GO:0005886; GO:0043005; GO:0043204	CNTNAP3,CNTNAP3B,CNTNAP3C	238680	TRUE	1.03924	2.26112e-08	7.51668e-06	chr13
ENSMUSG00000020841	ENSMUST00000021201; ENSMUST00000151584; ENSMUST00000132796	Cpd	protein_coding	protein_coding	carboxypeptidase D [Source:MGI Symbol;Acc:MGI:107265]	0.4567	2928	GO:0006508; GO:0006518; GO:0016485	GO:0008270; GO:0004181; GO:0044877; GO:0046872; GO:0016787; GO:0008233; GO:0008237; GO:0004180; GO:0051721	GO:0005634; GO:0016020; GO:0016021; GO:0005615; GO:0005886; GO:0048471; GO:0043231; GO:0005802	CPD	12874	TRUE	-0.250167	2.87291e-08	9.33822e-06	chr11
ENSMUSG00000040536	ENSMUST00000041606; ENSMUST00000108273; ENSMUST00000141105	Necab1	protein_coding	protein_coding	N-terminal EF-hand calcium binding protein 1 [Source:MGI Symbol;Acc:MGI:1916602]	0.4096	2522	GO:0001835; GO:0042984	GO:0005509; GO:0046872; GO:0042802	GO:0005829; GO:0005737; GO:0005654	NECAB1	69352	TRUE	0.835054	4.85881e-08	1.545e-05	chr4
ENSMUSG00000035105	ENSMUST00000039516	Egln3	protein_coding	protein_coding	egl-9 family hypoxia-inducible factor 3 [Source:MGI Symbol;Acc:MGI:1932288]	0.5135	2662	GO:0001666; GO:0006915; GO:0006919; GO:0018126; GO:0018401; GO:0042127	GO:0046872; GO:0016491; GO:0051213; GO:0005506; GO:0016705; GO:0016706; GO:0031418; GO:0031545	GO:0005634; GO:0005737; GO:0005829	EGLN3	112407	TRUE	-0.617383	6.07623e-08	1.891e-05	chr12
ENSMUSG00000040964	ENSMUST00000138493; ENSMUST00000105797; ENSMUST00000105798; ENSMUST00000105799; ENSMUST00000039204; ENSMUST00000097820; ENSMUST00000069623; ENSMUST00000140403; ENSMUST00000147426; ENSMUST00000125045; ENSMUST00000143614; ENSMUST00000154979	Arhgef10l	protein_coding	protein_coding	Rho guanine nucleotide exchange factor (GEF) 10-like [Source:MGI Symbol;Acc:MGI:1920004]	0.5972	2639	GO:0050790; GO:0030036; GO:0032933; GO:0051496	GO:0005085; GO:0005096	GO:0005829; GO:0005737	ARHGEF10L	72754	TRUE	0.299485	7.22792e-08	2.20256e-05	chr4
ENSMUSG00000067028	ENSMUST00000086738; ENSMUST00000188735; ENSMUST00000185484	Cntnap5b	protein_coding	protein_coding	contactin associated protein-like 5B [Source:MGI Symbol;Acc:MGI:3664583]	0.4599	2879	GO:0007155		GO:0016020; GO:0016021; GO:0005886; GO:0043005	CNTNAP5	241175	TRUE	-0.729861	7.45699e-08	2.22599e-05	chr1
ENSMUSG00000022180	ENSMUST00000022787; ENSMUST00000226646	Slc7a8	protein_coding	protein_coding	solute carrier family 7 (cationic amino acid transporter, y+ system), member 8 [Source:MGI Symbol;Acc:MGI:1355323]	0.5182	3120	GO:0055085; GO:0006865; GO:1901998; GO:0015695; GO:0089718; GO:1904273; GO:0070327; GO:0098713; GO:1903801; GO:0015807; GO:0015816; GO:0015804; GO:0015837; GO:0015820; GO:0015827; GO:0015829; GO:0035524	GO:0022857; GO:0015171; GO:0015179; GO:0019534; GO:0015101; GO:0015175; GO:0015180; GO:0015349; GO:0005275; GO:0015190; GO:0015187	GO:0016020; GO:0005737; GO:0016021; GO:0005886; GO:0016323; GO:0009925; GO:0031528; GO:0016324	SLC7A8	50934	TRUE	0.43455	8.92909e-08	2.61211e-05	chr14
ENSMUSG00000030878	ENSMUST00000033169; ENSMUST00000140247; ENSMUST00000207722	Cdr2	protein_coding	protein_coding	cerebellar degeneration-related 2 [Source:MGI Symbol;Acc:MGI:1100885]	0.5139	2271	GO:0008150	GO:0003674	GO:0005737	CDR2	12585	TRUE	-0.369992	1.08967e-07	3.06959e-05	chr7
ENSMUSG00000059895	ENSMUST00000230864; ENSMUST00000165541; ENSMUST00000167582; ENSMUST00000230044; ENSMUST00000230177; ENSMUST00000163582; ENSMUST00000230307; ENSMUST00000231209; ENSMUST00000229339; ENSMUST00000053232	Ptp4a3	protein_coding	protein_coding	protein tyrosine phosphatase 4a3 [Source:MGI Symbol;Acc:MGI:1277098]	0.5704	2387	GO:0006470; GO:0016311; GO:1990830; GO:0006355; GO:1901224; GO:0007219; GO:0043542; GO:0043117; GO:1900746; GO:1904951	GO:0016791; GO:0004725; GO:0008138; GO:0016787; GO:0004721	GO:0005634; GO:0005737; GO:0016020; GO:0005886; GO:0005768; GO:0005769	PTP4A3	19245	TRUE	0.282262	1.09126e-07	3.06959e-05	chr15
ENSMUSG00000032118	ENSMUST00000162633; ENSMUST00000034630; ENSMUST00000214772; ENSMUST00000216539; ENSMUST00000161500; ENSMUST00000163816; ENSMUST00000160041; ENSMUST00000162235; ENSMUST00000159137; ENSMUST00000161978	Fez1	protein_coding	protein_coding	fasciculation and elongation protein zeta 1 (zygin I) [Source:MGI Symbol;Acc:MGI:2670976]	0.4984	872	GO:0010976; GO:0045666; GO:0030010; GO:1902902; GO:0051654; GO:0070584; GO:0021766; GO:0061881; GO:0071363	GO:0005515; GO:0047485; GO:0043015; GO:0005080	GO:0005739; GO:0005737; GO:0030424; GO:0016020; GO:0005886; GO:0005794; GO:0005815; GO:0005856; GO:0005874; GO:0030426; GO:0043025; GO:0030425; GO:0005813; GO:0042995	FEZ1	235180	TRUE	-0.175937	1.13687e-07	3.13756e-05	chr9
ENSMUSG00000024268	ENSMUST00000115816; ENSMUST00000025117; ENSMUST00000223704; ENSMUST00000225477; ENSMUST00000224553; ENSMUST00000225528; ENSMUST00000224028; ENSMUST00000226091; ENSMUST00000225927; ENSMUST00000224143	Celf4	protein_coding	protein_coding	CUGBP, Elav-like family member 4 [Source:MGI Symbol;Acc:MGI:1932407]	0.5445	1993	GO:0001701; GO:0008380; GO:0006397; GO:0000381; GO:0090394; GO:0006376; GO:0060079; GO:0048025; GO:0048026; GO:0000380; GO:1902866	GO:0003723; GO:0003729; GO:0003676; GO:0036002; GO:0042835	GO:0005634; GO:0005737; GO:0005654; GO:1990904; GO:0098794	CELF4	108013	TRUE	0.239301	1.21709e-07	3.29674e-05	chr18
ENSMUSG00000076441	ENSMUST00000102840; ENSMUST00000126474; ENSMUST00000192802; ENSMUST00000130195	Ass1	protein_coding	protein_coding	argininosuccinate synthetase 1 [Source:MGI Symbol;Acc:MGI:88090]	0.5463	826	GO:0006526; GO:0051384; GO:0008652; GO:0007623; GO:0010043; GO:0045429; GO:0000050; GO:0010046; GO:0071499; GO:0006531; GO:0000052; GO:0000053; GO:0001822; GO:0001889; GO:0006953; GO:0007494; GO:0007568; GO:0007584; GO:0009410; GO:0009636; GO:0014075; GO:0032355; GO:0032496; GO:0043200; GO:0043434; GO:0048545; GO:0060416; GO:0060539; GO:0070542; GO:0071222; GO:0071230; GO:0071242; GO:0071320; GO:…	GO:0005524; GO:0004055; GO:0000166; GO:0016874; GO:0005515; GO:0042802; GO:0015643; GO:0016597	GO:0005739; GO:0005634; GO:0005829; GO:0005737; GO:0005654; GO:0005783; GO:0043005; GO:0043025; GO:0043204; GO:0005764; GO:0043209; GO:0070852; GO:0005741	ASS1	11898	TRUE	0.45144	1.35152e-07	3.59431e-05	chr2
ENSMUSG00000028832	ENSMUST00000030636; ENSMUST00000130253; ENSMUST00000127279; ENSMUST00000105867; ENSMUST00000105868	Stmn1	protein_coding	protein_coding	stathmin 1 [Source:MGI Symbol;Acc:MGI:96739]	0.4702	783	GO:0031110; GO:0007399; GO:0030154; GO:0031175; GO:0051497; GO:0007409; GO:0035024; GO:0031115; GO:0007019; GO:0000281; GO:0061436; GO:0007052; GO:0070495; GO:0009615; GO:0048012; GO:1905098	GO:0005515; GO:0015631	GO:0005829; GO:0005737; GO:0005856; GO:0016020; GO:0005874; GO:0043005	STMN1	16765	TRUE	0.267005	1.45e-07	3.78735e-05	chr4
ENSMUSG00000030747	ENSMUST00000033001; ENSMUST00000207491; ENSMUST00000207894; ENSMUST00000208591; ENSMUST00000207611; ENSMUST00000207893	Dgat2	protein_coding	protein_coding	diacylglycerol O-acyltransferase 2 [Source:MGI Symbol;Acc:MGI:1915050]	0.5732	906	GO:0046322; GO:0006629; GO:0044255; GO:0019915; GO:0042572; GO:0006640; GO:0006071; GO:0046339; GO:0045722; GO:0042632; GO:0090181; GO:0097006; GO:0019432; GO:0006651; GO:0034383; GO:0035356; GO:0010867; GO:0035336; GO:0050746; GO:0038183; GO:0055089; GO:0060613; GO:0071400	GO:0008374; GO:0016740; GO:0016746; GO:0004144; GO:0042803; GO:0050252; GO:0003846	GO:0005829; GO:0005737; GO:0016020; GO:0016021; GO:0005783; GO:0005789; GO:0043231; GO:0048471; GO:0005811; GO:0005739; GO:1990578; GO:0030176	DGAT2	67800	TRUE	0.542127	1.49701e-07	3.84153e-05	chr7
ENSMUSG00000036972	ENSMUST00000173342; ENSMUST00000172978; ENSMUST00000173054; ENSMUST00000174611; ENSMUST00000172646; ENSMUST00000170572; ENSMUST00000174212; ENSMUST00000173933; ENSMUST00000174802; ENSMUST00000172858; ENSMUST00000066384; ENSMUST00000085242	Zic4	protein_coding	protein_coding	zinc finger protein of the cerebellum 4 [Source:MGI Symbol;Acc:MGI:107201]	0.5111	1704	GO:0006357; GO:0007417	GO:0003677; GO:0046872; GO:0003676; GO:0000977; GO:0000978; GO:0000981; GO:1990837	GO:0005634	ZIC4	22774	TRUE	0.771348	1.59204e-07	3.97452e-05	chr9
ENSMUSG00000031661	ENSMUST00000034086; ENSMUST00000169179; ENSMUST00000211113	Nkd1	protein_coding	protein_coding	naked cuticle 1 [Source:MGI Symbol;Acc:MGI:2135954]	0.5519	2863	GO:0016055; GO:0007283; GO:0030154; GO:0030178; GO:0090090; GO:0045732; GO:1901231; GO:1901233; GO:2000096	GO:0005509; GO:0046872; GO:0005515; GO:0030165	GO:0005737; GO:0016020; GO:0005886; GO:0000159	NKD1	93960	TRUE	0.422666	1.60318e-07	3.97452e-05	chr8
ENSMUSG00000007021	ENSMUST00000130936; ENSMUST00000007236	Syngr3	protein_coding	protein_coding	synaptogyrin 3 [Source:MGI Symbol;Acc:MGI:1341881]	0.5587	1900	GO:0045055; GO:0001504; GO:0032411	GO:0005515; GO:0042169; GO:0047485	GO:0016020; GO:0045202; GO:0016021; GO:0031410; GO:0008021; GO:0030672; GO:0031594	SYNGR3	20974	TRUE	0.228159	1.64362e-07	4.00687e-05	chr17
ENSMUSG00000040543	ENSMUST00000108508; ENSMUST00000075258; ENSMUST00000134210; ENSMUST00000132781; ENSMUST00000142471	Pitpnm3	protein_coding	protein_coding	PITPNM family member 3 [Source:MGI Symbol;Acc:MGI:2685726]	0.5594	3668		GO:0046872; GO:0008289; GO:0005509; GO:0030971; GO:0004620	GO:0016020; GO:0110165; GO:0005737; GO:0012505; GO:0044297; GO:0042995; GO:0030134	PITPNM3	327958	TRUE	0.308481	1.82639e-07	4.37944e-05	chr11
ENSMUSG00000040875	ENSMUST00000183104; ENSMUST00000182384; ENSMUST00000183141; ENSMUST00000182199; ENSMUST00000182920; ENSMUST00000046627; ENSMUST00000182363; ENSMUST00000182413	Osbpl10	protein_coding	protein_coding	oxysterol binding protein-like 10 [Source:MGI Symbol;Acc:MGI:1921736]	0.5625	1730	GO:0006869; GO:0006629; GO:0015918	GO:0008289; GO:0015485; GO:0015248; GO:0032934; GO:0001786	GO:0005737; GO:0005829; GO:0043231; GO:0005856; GO:0016020	OSBPL10	74486	TRUE	0.413748	1.90955e-07	4.505e-05	chr9
ENSMUSG00000038765	ENSMUST00000041730; ENSMUST00000176067; ENSMUST00000239476; ENSMUST00000137559	Lmx1b	protein_coding	protein_coding	LIM homeobox transcription factor 1 beta [Source:MGI Symbol;Acc:MGI:1100513]	0.607	2000	GO:0006355; GO:0006357; GO:0048731	GO:0003677; GO:0000981; GO:0046872; GO:0003700; GO:1990837	GO:0005634	LMX1B	16917	TRUE	-3.72699	2.02256e-07	4.69587e-05	chr2
ENSMUSG00000006218	ENSMUST00000006380	Fam131c	protein_coding	protein_coding	family with sequence similarity 131, member C [Source:MGI Symbol;Acc:MGI:2685539]	0.6232	1433	GO:0008150	GO:0003674	GO:0005575	FAM131C	277743	TRUE	0.543912	2.20727e-07	5.03567e-05	chr4
ENSMUSG00000039037	ENSMUST00000044278; ENSMUST00000161757	St6galnac5	protein_coding	protein_coding	ST6 (alpha-N-acetyl-neuraminyl-2,3-beta-galactosyl-1,3)-N-acetylgalactosaminide alpha-2,6-sialyltransferase 5 [Source:MGI Symbol;Acc:MGI:1349471]	0.487	3148	GO:0006486; GO:0097503	GO:0008373; GO:0016740; GO:0016757	GO:0016020; GO:0016021; GO:0005794	ST6GALNAC5	26938	TRUE	0.603493	2.23777e-07	5.03567e-05	chr3
ENSMUSG00000058400	ENSMUST00000197447; ENSMUST00000091227; ENSMUST00000197275	Qrfpr	protein_coding	protein_coding	pyroglutamylated RFamide peptide receptor [Source:MGI Symbol;Acc:MGI:2677633]	0.4536	1461	GO:0007186; GO:0007165; GO:0007218	GO:0004930; GO:0004983	GO:0016021; GO:0016020; GO:0005886; GO:0005887; GO:0097730	QRFPR	229214	TRUE	-1.14851	2.40635e-07	5.33298e-05	chr3
ENSMUSG00000002957	ENSMUST00000003038; ENSMUST00000201320; ENSMUST00000201261	Ap2a2	protein_coding	protein_coding	adaptor-related protein complex 2, alpha 2 subunit [Source:MGI Symbol;Acc:MGI:101920]	0.5204	2262	GO:0006886; GO:0016192; GO:0015031; GO:0006898; GO:0072583; GO:0006897; GO:0098884; GO:1902036	GO:0005515; GO:0044877; GO:0008289; GO:0035615; GO:0035091; GO:0019901; GO:0019900; GO:0140312; GO:0019904; GO:0097718	GO:0030117; GO:0030131; GO:0016020; GO:0005886; GO:0030141; GO:0030122; GO:0005905; GO:0098794; GO:0008021; GO:0009898; GO:0031410; GO:0005737; GO:0012505	AP2A2	11772	TRUE	0.237397	2.65287e-07	5.79157e-05	chr7
ENSMUSG00000066197	ENSMUST00000084650	Gpr139	protein_coding	protein_coding	G protein-coupled receptor 139 [Source:MGI Symbol;Acc:MGI:2685341]	0.4394	4843	GO:0007186; GO:0007165; GO:0007218; GO:0007200	GO:0004930; GO:0042802; GO:0008188	GO:0016021; GO:0016020; GO:0005886; GO:0005887	GPR139	209776	TRUE	-1.16068	3.13386e-07	6.74103e-05	chr7
ENSMUSG00000049670	ENSMUST00000237567; ENSMUST00000051772	Morn4	protein_coding	protein_coding	MORN repeat containing 4 [Source:MGI Symbol;Acc:MGI:2449568]	0.5324	1996	GO:0048678	GO:0005515	GO:0005737; GO:0042995; GO:0032420; GO:0032433; GO:0032426	MORN4	226123	TRUE	0.204846	3.49759e-07	7.41438e-05	chr19
ENSMUSG00000024736	ENSMUST00000025645; ENSMUST00000120524; ENSMUST00000235186; ENSMUST00000238070	Tmem132a	protein_coding	protein_coding	transmembrane protein 132A [Source:MGI Symbol;Acc:MGI:2147810]	0.6158	2327	GO:0043069	GO:0003674	GO:0016020; GO:0016021; GO:0000139; GO:0005794; GO:0005783; GO:0005789	TMEM132A	98170	TRUE	0.520614	3.63087e-07	7.52226e-05	chr19
ENSMUSG00000012819	ENSMUST00000073242; ENSMUST00000105462; ENSMUST00000105464; ENSMUST00000105463; ENSMUST00000105461; ENSMUST00000153525; ENSMUST00000151194; ENSMUST00000135638; ENSMUST00000128249; ENSMUST00000156501; ENSMUST00000127312; ENSMUST00000144462; ENSMUST00000124712; ENSMUST00000153149; ENSMUST00000153677; ENSMUST00000123309	Cdh23	protein_coding	protein_coding	cadherin 23 (otocadherin) [Source:MGI Symbol;Acc:MGI:1890219]	0.5699	5812	GO:0007156; GO:0007155; GO:0007605; GO:0007626; GO:0060122; GO:0016339; GO:0042472; GO:0098742; GO:0050957; GO:0051480; GO:0045494; GO:0048839; GO:0006816; GO:0060088; GO:0042491; GO:0048563; GO:0050953	GO:0005509; GO:0005515; GO:0046872; GO:0045296; GO:0047485	GO:0016020; GO:0005886; GO:0016021; GO:0032420; GO:0045202; GO:0045177; GO:0005813; GO:0016342; GO:0001917; GO:0032426; GO:0098684; GO:0060091; GO:0098683	CDH23	22295	TRUE	-1.25611	3.65133e-07	7.52226e-05	chr10
ENSMUSG00000036098	ENSMUST00000088013; ENSMUST00000190922; ENSMUST00000186056; ENSMUST00000186854; ENSMUST00000189897; ENSMUST00000189439	Myrf	protein_coding	protein_coding	myelin regulatory factor [Source:MGI Symbol;Acc:MGI:2684944]	0.574	3693	GO:0016540; GO:0006355; GO:0006357; GO:0006508; GO:0045893; GO:0030154; GO:0048709; GO:0022010; GO:0031643; GO:0014003; GO:0032286	GO:0003677; GO:0003700; GO:0016787; GO:0043565; GO:0000981; GO:0008233; GO:0005515; GO:0042802	GO:0005829; GO:0005654; GO:0005634; GO:0005737; GO:0016020; GO:0016021; GO:0005783; GO:0005789; GO:0005794	MYRF	225908	TRUE	-0.303474	3.89404e-07	7.87025e-05	chr19
ENSMUSG00000089715	ENSMUST00000109627; ENSMUST00000230681; ENSMUST00000109625; ENSMUST00000109623; ENSMUST00000141345; ENSMUST00000148358; ENSMUST00000127721; ENSMUST00000129614	Cbx6	protein_coding	protein_coding	chromobox 6 [Source:MGI Symbol;Acc:MGI:3512628]	0.6022	2458	GO:0000122; GO:0006325	GO:0003727	GO:0005634; GO:0005694; GO:0031519; GO:0000792	CBX6	494448	TRUE	0.162868	3.92786e-07	7.87025e-05	chr15
ENSMUSG00000028661	ENSMUST00000030420	Epha8	protein_coding	protein_coding	Eph receptor A8 [Source:MGI Symbol;Acc:MGI:109378]	0.6128	4713	GO:0006468; GO:0007169; GO:0016310; GO:0007399; GO:0050896; GO:0007155; GO:0018108; GO:0048013; GO:0046777; GO:0007411; GO:0031175; GO:0030155; GO:0071372; GO:0033674; GO:0006929; GO:0016322; GO:0033628; GO:0043410; GO:0043552	GO:0005515; GO:0005524; GO:0004672; GO:0005003; GO:0016740; GO:0000166; GO:0016301; GO:0004713; GO:0004714; GO:0005005; GO:0005004; GO:0019838	GO:0016021; GO:0016020; GO:0005886; GO:0005887; GO:0042995; GO:0043005; GO:0005768; GO:0031901; GO:0043235	EPHA8	13842	TRUE	0.47002	4.03977e-07	7.9851e-05	chr4
ENSMUSG00000019082	ENSMUST00000019226; ENSMUST00000106007; ENSMUST00000106006; ENSMUST00000201710; ENSMUST00000140602; ENSMUST00000201558; ENSMUST00000124266; ENSMUST00000153190; ENSMUST00000156002; ENSMUST00000148100; ENSMUST00000174095; ENSMUST00000144174; ENSMUST00000138865; ENSMUST00000136354; ENSMUST00000184518; ENSMUST00000201127; ENSMUST00000201708; ENSMUST00000201822; ENSMUST00000201072; ENSMUST00000172654;…	Slc25a22	protein_coding	protein_coding	solute carrier family 25 (mitochondrial carrier, glutamate), member 22 [Source:MGI Symbol;Acc:MGI:1915517]	0.5812	1267	GO:0055085; GO:1902600; GO:0050796; GO:0015813; GO:0015810; GO:0043490; GO:0070778	GO:0015293; GO:0022857; GO:0005313; GO:0015183; GO:0005280	GO:0005739; GO:0005737; GO:0016020; GO:0016021; GO:0005743; GO:0043231	SLC25A22	68267	TRUE	0.257285	4.43612e-07	8.65162e-05	chr7
ENSMUSG00000053963	ENSMUST00000136521; ENSMUST00000211561; ENSMUST00000210737; ENSMUST00000210107; ENSMUST00000179826; ENSMUST00000211782	Stum	protein_coding	protein_coding	mechanosensory transduction mediator [Source:MGI Symbol;Acc:MGI:2138735]	0.5747	1818	GO:0008150	GO:0003674	GO:0005575; GO:0016020; GO:0016021	STUM	381310	TRUE	0.523527	4.58295e-07	8.71559e-05	chr1
ENSMUSG00000000247	ENSMUST00000143783; ENSMUST00000149664; ENSMUST00000133661; ENSMUST00000000253; ENSMUST00000176229; ENSMUST00000155964; ENSMUST00000175896	Lhx2	protein_coding	protein_coding	LIM homeobox protein 2 [Source:MGI Symbol;Acc:MGI:96785]	0.6015	1157	GO:0006355; GO:0048731; GO:0045944; GO:0022008; GO:0060041; GO:0048675; GO:0030182; GO:0001942; GO:0006357; GO:0045893; GO:0007420; GO:0007399; GO:0001843; GO:0021772; GO:0021987; GO:0007411; GO:0009953; GO:0045199; GO:0045814; GO:0048646; GO:2000179; GO:2000678; GO:0007498; GO:0021537; GO:0021978; GO:0050768	GO:0003677; GO:0000981; GO:0046872; GO:0000978; GO:0001228; GO:0043565; GO:0005515; GO:0003682; GO:0000977	GO:0005634; GO:0005654	LHX2	16870	TRUE	0.673225	4.59204e-07	8.71559e-05	chr2
ENSMUSG00000032936	ENSMUST00000035700; ENSMUST00000192318; ENSMUST00000193533; ENSMUST00000195219; ENSMUST00000194206	Camkv	protein_coding	protein_coding	CaM kinase-like vesicle-associated [Source:MGI Symbol;Acc:MGI:2384296]	0.5702	2059	GO:0006468; GO:0018105; GO:0099159	GO:0005524; GO:0004672; GO:0005516; GO:0004683	GO:0016020; GO:0005886; GO:0031410; GO:0030659; GO:0098978; GO:0098794	CAMKV	235604	TRUE	0.509623	4.64768e-07	8.71559e-05	chr9
ENSMUSG00000075270	ENSMUST00000124825; ENSMUST00000099992; ENSMUST00000144892	Pde11a	protein_coding	protein_coding	phosphodiesterase 11A [Source:MGI Symbol;Acc:MGI:3036251]	0.4745	2631	GO:0007165; GO:0008152; GO:0043951; GO:0010754	GO:0005515; GO:0004114; GO:0008081; GO:0046872; GO:0016787; GO:0003824; GO:0047555; GO:0004115; GO:0030553; GO:0004118; GO:0004112	GO:0005737; GO:0005829; GO:0043204	PDE11A	241489	TRUE	-1.40588	5.16671e-07	9.47341e-05	chr2
ENSMUSG00000074785	ENSMUST00000099337; ENSMUST00000218839; ENSMUST00000180514; ENSMUST00000181244; ENSMUST00000180573	Plxnc1	protein_coding	protein_coding	plexin C1 [Source:MGI Symbol;Acc:MGI:1890127]	0.487	1945	GO:0007165; GO:0071526; GO:0043087; GO:0030334; GO:0008360; GO:0007162; GO:0050772; GO:1902287	GO:0005515; GO:0017154	GO:0016020; GO:0016021; GO:0005887; GO:0002116	PLXNC1	54712	TRUE	0.323898	5.18133e-07	9.47341e-05	chr10
ENSMUSG00000038648	ENSMUST00000041093; ENSMUST00000128534	Creb3l2	protein_coding	protein_coding	cAMP responsive element binding protein 3-like 2 [Source:MGI Symbol;Acc:MGI:2442695]	0.5349	3865	GO:0006355; GO:0010628; GO:0010976; GO:0006357; GO:0045893; GO:0006986; GO:0045944; GO:0030968; GO:0051216; GO:0006888; GO:0034976; GO:0002062; GO:0009611	GO:0003700; GO:0000976; GO:0003677; GO:0000981; GO:0035497; GO:0001228; GO:0000978	GO:0005634; GO:0000785; GO:0005654; GO:0016020; GO:0016021; GO:0005783; GO:0005789; GO:0005829; GO:0097038; GO:0000139	CREB3L2	208647	TRUE	-0.287105	5.609e-07	0.000101287	chr6
ENSMUSG00000042816	ENSMUST00000054738	Gpr151	protein_coding	protein_coding	G protein-coupled receptor 151 [Source:MGI Symbol;Acc:MGI:2441887]	0.4881	1772	GO:0007186; GO:0007165; GO:0010447	GO:0004930; GO:0042802	GO:0016021; GO:0016020; GO:0005886; GO:0005887	GPR151	240239	TRUE	1.88416	6.65826e-07	0.000118769	chr18
ENSMUSG00000032064	ENSMUST00000034566; ENSMUST00000141919; ENSMUST00000117646; ENSMUST00000119449; ENSMUST00000121634; ENSMUST00000124424; ENSMUST00000120622; ENSMUST00000151109; ENSMUST00000149717; ENSMUST00000154315; ENSMUST00000117093; ENSMUST00000118707	Dixdc1	protein_coding	protein_coding	DIX domain containing 1 [Source:MGI Symbol;Acc:MGI:2679721]	0.5026	2328	GO:0060070; GO:0016055; GO:0046330; GO:0050772; GO:0021695; GO:0021799; GO:0032956; GO:0070507; GO:0021795; GO:0021846; GO:0021869; GO:0030177; GO:0045665	GO:0005515; GO:0003779; GO:0019904; GO:0043015; GO:0031435	GO:0005829; GO:0005737; GO:0032991; GO:0070161; GO:0005856; GO:0005925; GO:0043025; GO:0043679	DIXDC1	330938	TRUE	-0.20462	6.87861e-07	0.000121221	chr9
ENSMUSG00000029161	ENSMUST00000031051; ENSMUST00000202627	Cgref1	protein_coding	protein_coding	cell growth regulator with EF hand domain 1 [Source:MGI Symbol;Acc:MGI:1915817]	0.5349	1117		GO:0005509; GO:0046872		CGREF1	68567	TRUE	0.280559	7.01476e-07	0.000122149	chr5
ENSMUSG00000037679	ENSMUST00000101029; ENSMUST00000220786; ENSMUST00000222275	Inf2	protein_coding	protein_coding	inverted formin, FH2 and WH2 domain containing [Source:MGI Symbol;Acc:MGI:1917685]	0.589	2383	GO:0016043; GO:0030036; GO:0090140	GO:0031267; GO:0003779	GO:0048471	INF2	70435	TRUE	-0.264951	7.3262e-07	0.000126071	chr12
ENSMUSG00000021609	ENSMUST00000022100	Slc6a3	protein_coding	protein_coding	solute carrier family 6 (neurotransmitter transporter, dopamine), member 3 [Source:MGI Symbol;Acc:MGI:94862]	0.5156	3456	GO:0007626; GO:0007608; GO:0006836; GO:0035725; GO:0045471; GO:0042416; GO:0051591; GO:0060134; GO:0040018; GO:0042220; GO:0007595; GO:0015844; GO:0015872; GO:0051620; GO:0090494; GO:0015874; GO:0051583; GO:0042420; GO:0021984; GO:1990384; GO:0001504; GO:0042053; GO:0007568; GO:0009410; GO:0010039; GO:0014070; GO:0035094	GO:0044877; GO:0046872; GO:0015293; GO:0005515; GO:0005102; GO:0002020; GO:0051721; GO:1901363; GO:0005330; GO:0008504; GO:0005326; GO:0005334; GO:0043176; GO:0035240; GO:0047485	GO:0016021; GO:0030424; GO:0016020; GO:0005886; GO:0005887; GO:0009986; GO:0042995; GO:0043005; GO:0043025; GO:0045121; GO:0099056; GO:0099055; GO:0042734; GO:0043679; GO:0016600; GO:0098691; GO:0032809	SLC6A3	13162	TRUE	-4.5405	7.48649e-07	0.000127331	chr13
ENSMUSG00000034295	ENSMUST00000234462; ENSMUST00000037097; ENSMUST00000234526; ENSMUST00000234834; ENSMUST00000234199	Fhod3	protein_coding	protein_coding	formin homology 2 domain containing 3 [Source:MGI Symbol;Acc:MGI:1925847]	0.5474	3672	GO:0045214; GO:0030837; GO:0055003; GO:0030866; GO:0051639	GO:0003779; GO:0051015	GO:0005737; GO:0005856; GO:0005865; GO:0030018	FHOD3	225288	TRUE	0.262713	8.07724e-07	0.0001358	chr18
ENSMUSG00000025511	ENSMUST00000026585; ENSMUST00000138092; ENSMUST00000146305; ENSMUST00000140858; ENSMUST00000117634; ENSMUST00000239217; ENSMUST00000130402	Tspan4	protein_coding	protein_coding	tetraspanin 4 [Source:MGI Symbol;Acc:MGI:1928097]	0.5806	873	GO:0065003	GO:0005515; GO:0003823; GO:0005178	GO:0016021; GO:0016020; GO:0005886; GO:0005887; GO:0031982	TSPAN4	64540	TRUE	0.438672	8.32852e-07	0.000138433	chr7
ENSMUSG00000027221	ENSMUST00000065797	Chst1	protein_coding	protein_coding	carbohydrate sulfotransferase 1 [Source:MGI Symbol;Acc:MGI:1924219]	0.5728	2680	GO:0005975; GO:0006954; GO:0006044; GO:0006790; GO:0006012; GO:0018146; GO:0042339	GO:0008146; GO:0016740; GO:0001517; GO:0045130	GO:0016020; GO:0016021; GO:0000139; GO:0005794; GO:0005802	CHST1	76969	TRUE	0.320469	8.53722e-07	0.000140308	chr2
ENSMUSG00000042750	ENSMUST00000049130	Bex2	protein_coding	protein_coding	brain expressed X-linked 2 [Source:MGI Symbol;Acc:MGI:1338017]	0.5449	903	GO:0045944; GO:0007049; GO:0006915; GO:0007165; GO:0051091	GO:0005102; GO:0061629; GO:0005515	GO:0005634; GO:0005737; GO:0005667	BEX1,BEX2	12069	TRUE	0.264184	9.13797e-07	0.000148512	chrX
ENSMUSG00000036617	ENSMUST00000114610; ENSMUST00000146881; ENSMUST00000114627; ENSMUST00000131714; ENSMUST00000238889; ENSMUST00000045555; ENSMUST00000114614; ENSMUST00000114604; ENSMUST00000146613; ENSMUST00000066509; ENSMUST00000129278; ENSMUST00000123383; ENSMUST00000136870; ENSMUST00000125556; ENSMUST00000146488; ENSMUST00000125772; ENSMUST00000114607; ENSMUST00000114606; ENSMUST00000114608; ENSMUST00000139531;…	Etl4	protein_coding	protein_coding	enhancer trap locus 4 [Source:MGI Symbol;Acc:MGI:95454]	0.5011	3201	GO:0048706	GO:0005515; GO:0003674	GO:0110165; GO:0005737	KIAA1217	208618	TRUE	-0.356015	9.46568e-07	0.000152148	chr2
ENSMUSG00000019876	ENSMUST00000095668; ENSMUST00000075992; ENSMUST00000177299; ENSMUST00000176225; ENSMUST00000177438; ENSMUST00000176741; ENSMUST00000177325; ENSMUST00000177473; ENSMUST00000066028; ENSMUST00000175852; ENSMUST00000176354	Pkib	protein_coding	protein_coding	protein kinase inhibitor beta, cAMP dependent, testis specific [Source:MGI Symbol;Acc:MGI:101937]	0.4378	1875	GO:0006469; GO:0051338; GO:2000480; GO:0032212; GO:0051973; GO:1904355	GO:0004862; GO:0004860		PKIB	18768	TRUE	0.548077	9.8174e-07	0.000156086	chr10
ENSMUSG00000020044	ENSMUST00000020234; ENSMUST00000151134; ENSMUST00000136045; ENSMUST00000132307	Timp3	protein_coding	protein_coding	tissue inhibitor of metalloproteinase 3 [Source:MGI Symbol;Acc:MGI:98754]	0.5131	2279	GO:0010951; GO:0071310; GO:0070373; GO:0010466; GO:0009725; GO:0045861; GO:0051045; GO:1903984; GO:1904706; GO:0010033; GO:0034097; GO:1901706; GO:1904684	GO:0005515; GO:0008191; GO:0046872; GO:0008270; GO:0004857; GO:0030414; GO:0002020	GO:0005737; GO:0005615; GO:0005576; GO:0031012; GO:0005604	TIMP3	21859	TRUE	0.173188	1.05835e-06	0.000166456	chr10
ENSMUSG00000038319	ENSMUST00000115098; ENSMUST00000036092; ENSMUST00000129246; ENSMUST00000126791; ENSMUST00000142197	Kcnh2	protein_coding	protein_coding	potassium voltage-gated channel, subfamily H (eag-related), member 2 [Source:MGI Symbol;Acc:MGI:1341722]	0.6084	1894	GO:0055085; GO:0006811; GO:0071805; GO:0006813; GO:0034220; GO:0034765; GO:0042391; GO:0045893; GO:0055075; GO:0060048; GO:0060306; GO:0060307; GO:0071466; GO:0086005; GO:0086009; GO:0086010; GO:0086011; GO:0086013; GO:0086091; GO:0097623; GO:0098915; GO:1901379; GO:1901380; GO:1901381; GO:1903765; GO:1990573	GO:0005216; GO:0005249; GO:0005244; GO:0005267; GO:0000976; GO:0005242; GO:0005251; GO:0031625; GO:0042802; GO:0042803; GO:0055131; GO:0097110; GO:1902282	GO:0016020; GO:0016021; GO:0005886; GO:0008076; GO:0009986; GO:0048471; GO:1902937	KCNH2	16511	TRUE	0.353094	1.11662e-06	0.000173754	chr5
ENSMUSG00000022548	ENSMUST00000130560; ENSMUST00000115230; ENSMUST00000023207; ENSMUST00000156456; ENSMUST00000155682; ENSMUST00000145837	Apod	protein_coding	protein_coding	apolipoprotein D [Source:MGI Symbol;Acc:MGI:88056]	0.5038	879	GO:0006006; GO:0006629; GO:0006869; GO:0042308; GO:0007420; GO:0071638; GO:0048662; GO:0051895; GO:0007568; GO:0000302; GO:0010642; GO:0042246; GO:1900016; GO:0014012; GO:0048678; GO:0060588; GO:2000098; GO:2000405	GO:0008289; GO:0015485	GO:0005737; GO:0005615; GO:0005783; GO:0048471; GO:0005576; GO:0030425; GO:0043025; GO:0022626	APOD	11815	TRUE	-0.426407	1.14866e-06	0.000176857	chr16
ENSMUSG00000033740	ENSMUST00000140079; ENSMUST00000131494; ENSMUST00000043578; ENSMUST00000139756; ENSMUST00000131467; ENSMUST00000150761; ENSMUST00000151281; ENSMUST00000139838; ENSMUST00000163727; ENSMUST00000132207; ENSMUST00000142304; ENSMUST00000151015; ENSMUST00000130338	St18	protein_coding	protein_coding	suppression of tumorigenicity 18 [Source:MGI Symbol;Acc:MGI:2446700]	0.4464	2719	GO:0006355; GO:0045944; GO:0000122; GO:0008285; GO:0006357; GO:2001269; GO:0033209; GO:0070102; GO:0070498	GO:0008270; GO:0000978; GO:0003677; GO:0046872; GO:0000981; GO:0000977	GO:0005634; GO:0032993	ST18	240690	TRUE	-0.318264	1.19035e-06	0.000181068	chr1
ENSMUSG00000020098	ENSMUST00000218005; ENSMUST00000020298	Pcbd1	protein_coding	protein_coding	pterin 4 alpha carbinolamine dehydratase/dimerization cofactor of hepatocyte nuclear factor 1 alpha (TCF1) 1 [Source:MGI Symbol;Acc:MGI:94873]	0.5356	575	GO:0006729; GO:0043393; GO:0045893; GO:0006558; GO:0019293	GO:0008124; GO:0016829; GO:0005515; GO:0042802; GO:0003713; GO:0004505	GO:0005634; GO:0005829; GO:0005654; GO:0005737	PCBD1	13180	TRUE	0.355853	1.20076e-06	0.000181068	chr10
ENSMUSG00000017493	ENSMUST00000017637; ENSMUST00000177092; ENSMUST00000177105; ENSMUST00000130530; ENSMUST00000123946; ENSMUST00000140772	Igfbp4	protein_coding	protein_coding	insulin-like growth factor binding protein 4 [Source:MGI Symbol;Acc:MGI:96439]	0.5634	1183	GO:0010906; GO:0043410; GO:0000165; GO:0001558; GO:0040008; GO:0044342; GO:0043568; GO:0043567; GO:0006954; GO:0014070	GO:0005515; GO:0019838; GO:0005520; GO:0031994; GO:0031995	GO:0005576; GO:0005615	IGFBP4	16010	TRUE	-0.593958	1.24074e-06	0.000185186	chr11
ENSMUSG00000032060	ENSMUST00000217475; ENSMUST00000214609; ENSMUST00000034562; ENSMUST00000214962; ENSMUST00000216755; ENSMUST00000216393	Cryab	protein_coding	protein_coding	crystallin, alpha B [Source:MGI Symbol;Acc:MGI:88516]	0.5316	831	GO:0043066; GO:0010629; GO:0043154; GO:0002088; GO:0043010; GO:0045892; GO:0031333; GO:0007517; GO:0050821; GO:0001666; GO:0030308; GO:0051403; GO:0006457; GO:1905907; GO:2000378; GO:0042542; GO:0071480; GO:0010941; GO:0032387; GO:0060561; GO:0009408; GO:0042026; GO:0007021; GO:0007568; GO:0010259; GO:0031109; GO:0032355	GO:0005212; GO:0005515; GO:0044877; GO:0046872; GO:0042802; GO:0042803; GO:0008092; GO:0008017; GO:0001540; GO:0005198; GO:0051082	GO:0005739; GO:0005634; GO:0045202; GO:0014069; GO:0005829; GO:0005737; GO:0030424; GO:0005886; GO:0005794; GO:0032991; GO:0009986; GO:0015630; GO:0005576; GO:0005764; GO:0030018; GO:0043204; GO:0043292; GO:0043197; GO:0043209; GO:0031430; GO:0097512; GO:0031674; GO:0097060; GO:0032432	CRYAB	12955	TRUE	-0.407978	1.39505e-06	0.000206116	chr9
ENSMUSG00000038526	ENSMUST00000036181; ENSMUST00000147962; ENSMUST00000149202; ENSMUST00000126722	Car14	protein_coding	protein_coding	carbonic anhydrase 14 [Source:MGI Symbol;Acc:MGI:1344341]	0.5016	1010	GO:0006885; GO:0006730; GO:0015670	GO:0008270; GO:0046872; GO:0016829; GO:0004089; GO:0016836	GO:0016020; GO:0016021; GO:0005886	CA14	23831	TRUE	-0.396988	1.41992e-06	0.000207691	chr3
ENSMUSG00000065954	ENSMUST00000084512; ENSMUST00000084030; ENSMUST00000209441; ENSMUST00000210645; ENSMUST00000210016; ENSMUST00000211622; ENSMUST00000210933; ENSMUST00000210767; ENSMUST00000210488; ENSMUST00000209827; ENSMUST00000211584; ENSMUST00000209633; ENSMUST00000211218	Tacc1	protein_coding	protein_coding	transforming, acidic coiled-coil containing protein 1 [Source:MGI Symbol;Acc:MGI:2443510]	0.5315	1939	GO:0022008; GO:0072089; GO:0007049; GO:0000226; GO:0051301; GO:0045893; GO:0007052; GO:0021987; GO:0032886; GO:0008283; GO:0022027	GO:0019904; GO:0030374; GO:0046966; GO:0016922; GO:0042974; GO:0035259; GO:0042975; GO:0030331; GO:0046965	GO:0005829; GO:0005634; GO:0005737; GO:0005815; GO:0005856; GO:0030496	TACC1	320165	TRUE	-0.15207	1.52431e-06	0.000218595	chr8
ENSMUSG00000070509	ENSMUST00000119206; ENSMUST00000094312; ENSMUST00000128471; ENSMUST00000139780; ENSMUST00000206253	Rgma	protein_coding	protein_coding	repulsive guidance molecule family member A [Source:MGI Symbol;Acc:MGI:2679262]	0.5967	2558	GO:0030509; GO:0010975; GO:0048681; GO:0045944; GO:0010976; GO:0010977; GO:0001934; GO:0043547; GO:0031175; GO:1900121; GO:0001843; GO:0030510; GO:0006509; GO:0051044; GO:0048671	GO:0015026; GO:0005515; GO:0005102; GO:1990459	GO:0016020; GO:0005886; GO:0031225; GO:0110165; GO:0009986; GO:0005783; GO:0043005	RGMA	244058	TRUE	0.277661	1.52435e-06	0.000218595	chr7
ENSMUSG00000005580	ENSMUST00000117801; ENSMUST00000120080; ENSMUST00000005719	Adcy9	protein_coding	protein_coding	adenylate cyclase 9 [Source:MGI Symbol;Acc:MGI:108450]	0.5514	4646	GO:0035556; GO:0009190; GO:0001701; GO:0007189; GO:0006171; GO:0071880	GO:0016849; GO:0046872; GO:0000166; GO:0005524; GO:0016829; GO:0004016	GO:0030424; GO:0016020; GO:0016021; GO:0005886; GO:0005887; GO:0030425	ADCY9	11515	TRUE	-0.202208	1.55495e-06	0.000220818	chr16
ENSMUSG00000057788	ENSMUST00000008004; ENSMUST00000144890; ENSMUST00000127094; ENSMUST00000138688; ENSMUST00000127076	Ddx49	protein_coding	protein_coding	DEAD box helicase 49 [Source:MGI Symbol;Acc:MGI:2136689]	0.5629	1329	GO:0030307; GO:0006364; GO:0044357	GO:0005524; GO:0003676; GO:0003724; GO:0016787; GO:0000166; GO:0003723; GO:0004386; GO:0016887	GO:0005634	DDX49	234374	TRUE	0.28139	1.58249e-06	0.000222568	chr8
ENSMUSG00000024553	ENSMUST00000065224	Galr1	protein_coding	protein_coding	galanin receptor 1 [Source:MGI Symbol;Acc:MGI:1096364]	0.5005	2987	GO:0007186; GO:0045944; GO:0007165; GO:0007194; GO:0007218; GO:0007189; GO:0007204; GO:0051464	GO:0004930; GO:0017046; GO:0008528; GO:0042923; GO:0004966	GO:0016021; GO:0016020; GO:0005886; GO:0005887	GALR1	14427	TRUE	1.16889	1.86284e-06	0.000259502	chr18
ENSMUSG00000078695	ENSMUST00000107584; ENSMUST00000107585; ENSMUST00000107583; ENSMUST00000145623	Cisd3	protein_coding	protein_coding	CDGSH iron sulfur domain 3 [Source:MGI Symbol;Acc:MGI:101788]	0.5157	497	GO:0106034	GO:0051537; GO:0046872; GO:0051536	GO:0043231; GO:0005737; GO:0005739	CISD3	217149	TRUE	0.289405	1.99379e-06	0.000275124	chr11
ENSMUSG00000022514	ENSMUST00000096129; ENSMUST00000166294; ENSMUST00000174202; ENSMUST00000023156; ENSMUST00000174171; ENSMUST00000173136; ENSMUST00000174644	Il1rap	protein_coding	protein_coding	interleukin 1 receptor accessory protein [Source:MGI Symbol;Acc:MGI:104975]	0.4288	2828	GO:0007165; GO:0002376; GO:0006954; GO:0045087; GO:0051092; GO:0019221; GO:0032755; GO:0051965; GO:0099151; GO:0099560; GO:1905606; GO:0032753; GO:0032754; GO:0032736; GO:0038172; GO:0099545	GO:0016787; GO:0005515; GO:0004908; GO:0050135; GO:0061809; GO:0003953; GO:0005149; GO:0002114	GO:0005737; GO:0016020; GO:0016021; GO:0005886; GO:0032991; GO:0005576; GO:0098978	IL1RAP	16180	TRUE	-0.316017	2.04603e-06	0.000279695	chr16
ENSMUSG00000029772	ENSMUST00000136031; ENSMUST00000143707; ENSMUST00000102995; ENSMUST00000115242; ENSMUST00000201282; ENSMUST00000150365; ENSMUST00000143091; ENSMUST00000125911; ENSMUST00000064872; ENSMUST00000152581; ENSMUST00000176265; ENSMUST00000154079; ENSMUST00000135396; ENSMUST00000115238; ENSMUST00000128927; ENSMUST00000134438; ENSMUST00000138205; ENSMUST00000149816; ENSMUST00000202115; ENSMUST00000201020;…	Ahcyl2	protein_coding	protein_coding	S-adenosylhomocysteine hydrolase-like 2 [Source:MGI Symbol;Acc:MGI:1921590]	0.4801	2032	GO:0006730; GO:0033353	GO:0016787	GO:0005737; GO:0005783; GO:0005829; GO:0043005; GO:0043231	AHCYL2	74340	TRUE	-0.21939	2.24355e-06	0.000299838	chr6
ENSMUSG00000038048	ENSMUST00000076038	Cntnap5c	protein_coding	protein_coding	contactin associated protein-like 5C [Source:MGI Symbol;Acc:MGI:3646013]	0.4711	3931	GO:0007155		GO:0016020; GO:0016021; GO:0005886; GO:0043005	CNTNAP5	620292	TRUE	-0.685985	2.24723e-06	0.000299838	chr17
ENSMUSG00000029608	ENSMUST00000079204; ENSMUST00000202406; ENSMUST00000202326; ENSMUST00000200792	Rph3a	protein_coding	protein_coding	rabphilin 3A [Source:MGI Symbol;Acc:MGI:102788]	0.5552	2904	GO:0006886; GO:0015031; GO:0006887; GO:0032940; GO:0097061; GO:2000310; GO:0017158; GO:0061669	GO:0031267; GO:0005515; GO:0044877; GO:0046872; GO:0008289; GO:0005509; GO:0005544; GO:0008270; GO:0042301; GO:0005546; GO:0008430; GO:0070679	GO:0045202; GO:0005829; GO:0016020; GO:0005886; GO:0005794; GO:0032991; GO:0031410; GO:0045211; GO:0042995; GO:0043005; GO:0098981; GO:0030672; GO:0030141; GO:0031594; GO:0019898; GO:0043197; GO:0008021; GO:0098850	RPH3A	19894	TRUE	0.319666	2.25488e-06	0.000299838	chr5
ENSMUSG00000021943	ENSMUST00000168727	Gdf10	protein_coding	protein_coding	growth differentiation factor 10 [Source:MGI Symbol;Acc:MGI:95684]	0.5179	5210	GO:0045669; GO:0001503; GO:0045444; GO:0045668; GO:0010862; GO:0060395; GO:0001649; GO:0021549; GO:0030278; GO:0042698; GO:0071559	GO:0008083; GO:0005125	GO:0005615; GO:0005576	GDF10	14560	TRUE	0.728722	2.28964e-06	0.000301716	chr14
ENSMUSG00000023972	ENSMUST00000232855; ENSMUST00000044442	Ptk7	protein_coding	protein_coding	PTK7 protein tyrosine kinase 7 [Source:MGI Symbol;Acc:MGI:1918711]	0.5631	3527	GO:0006468; GO:0010976; GO:0071300; GO:0016477; GO:0007507; GO:0016055; GO:0060828; GO:0007155; GO:0001822; GO:0042060; GO:0060976; GO:0001843; GO:0003281; GO:0090263; GO:0001736; GO:0031532; GO:0090179; GO:0060484; GO:0045198; GO:0003401; GO:0060026; GO:0090103	GO:0005524; GO:0004672; GO:0050839	GO:0016020; GO:0016021; GO:0005886; GO:0070161; GO:0005911	PTK7	71461	TRUE	0.365164	2.36172e-06	0.000308437	chr17
ENSMUSG00000049336	ENSMUST00000102801; ENSMUST00000163524; ENSMUST00000057207; ENSMUST00000146113; ENSMUST00000149787; ENSMUST00000155147; ENSMUST00000128501; ENSMUST00000157030	Tenm2	protein_coding	protein_coding	teneurin transmembrane protein 2 [Source:MGI Symbol;Acc:MGI:1345184]	0.5321	4233	GO:0007165		GO:0016021; GO:0016020; GO:0005886; GO:0005887; GO:0042995	TENM2	23964	TRUE	0.470148	2.44611e-06	0.00031663	chr11
ENSMUSG00000023031	ENSMUST00000230572; ENSMUST00000023775; ENSMUST00000230740; ENSMUST00000229869; ENSMUST00000230744; ENSMUST00000229235; ENSMUST00000230312; ENSMUST00000229888; ENSMUST00000230642	Cela1	protein_coding	protein_coding	chymotrypsin-like elastase family, member 1 [Source:MGI Symbol;Acc:MGI:95314]	0.5406	639	GO:0006508; GO:0048771; GO:0016055; GO:0045944; GO:0045766; GO:0009791; GO:0035264; GO:0006954; GO:0000122; GO:0006366; GO:0042127; GO:0045595; GO:0031017; GO:0060309; GO:0055123; GO:0061113	GO:0004252; GO:0046872; GO:0016787; GO:0008233; GO:0008236	GO:0005615; GO:0005576; GO:0062023	CELA1	109901	TRUE	0.734725	2.60221e-06	0.000333882	chr15
ENSMUSG00000009394	ENSMUST00000203768; ENSMUST00000169345; ENSMUST00000009538; ENSMUST00000203450; ENSMUST00000203707; ENSMUST00000204617; ENSMUST00000204726	Syn2	protein_coding	protein_coding	synapsin II [Source:MGI Symbol;Acc:MGI:103020]	0.5152	2724	GO:0007269; GO:0097091; GO:0099504; GO:0017156	GO:0005515; GO:0005524; GO:0042802; GO:0048306	GO:0045202; GO:0014069; GO:0005886; GO:0098978; GO:0008021; GO:0030672; GO:0043209; GO:0098685; GO:0098850; GO:0031201	SYN2	20965	TRUE	0.355542	2.70579e-06	0.000343834	chr6
ENSMUSG00000001988	ENSMUST00000210748; ENSMUST00000002053; ENSMUST00000211103; ENSMUST00000211695	Npas1	protein_coding	protein_coding	neuronal PAS domain protein 1 [Source:MGI Symbol;Acc:MGI:109205]	0.6291	1864	GO:0006355; GO:0000122; GO:0006357; GO:0045892; GO:0042711; GO:0001964	GO:0005515; GO:0046983; GO:0003677; GO:0000977; GO:0000981; GO:0046982	GO:0005634	NPAS1	18142	TRUE	-1.33398	2.74846e-06	0.000343834	chr7
ENSMUSG00000034488	ENSMUST00000118731; ENSMUST00000153974; ENSMUST00000081769; ENSMUST00000134241; ENSMUST00000133761; ENSMUST00000137921; ENSMUST00000140625; ENSMUST00000043111	Edil3	protein_coding	protein_coding	EGF-like repeats and discoidin I-like domains 3 [Source:MGI Symbol;Acc:MGI:1329025]	0.4219	3032	GO:0007155; GO:0010811	GO:0005509; GO:0046872	GO:0005576	EDIL3	13612	TRUE	-0.260588	2.76365e-06	0.000343834	chr13
ENSMUSG00000035413	ENSMUST00000040865	Tmem98	protein_coding	protein_coding	transmembrane protein 98 [Source:MGI Symbol;Acc:MGI:1923457]	0.5701	1633	GO:0010955; GO:1900181; GO:0045063; GO:0048715; GO:0031642	GO:0005515	GO:0070062; GO:0016020; GO:0016021; GO:0005886; GO:0005615; GO:0005783; GO:0005789; GO:0005576	TMEM98	103743	TRUE	-0.352555	2.7738e-06	0.000343834	chr11
ENSMUSG00000060371	ENSMUST00000086029; ENSMUST00000202728; ENSMUST00000141131; ENSMUST00000111287; ENSMUST00000111288	Caln1	protein_coding	protein_coding	calneuron 1 [Source:MGI Symbol;Acc:MGI:2155987]	0.5211	2865	GO:0008150	GO:0005509; GO:0046872	GO:0005737; GO:0016020; GO:0016021; GO:0005794; GO:0005886; GO:0048471; GO:0032588	CALN1	140904	TRUE	-1.35353	2.95909e-06	0.000362566	chr5
ENSMUSG00000074766	ENSMUST00000184404; ENSMUST00000099307	Ism1	protein_coding	protein_coding	isthmin 1, angiogenesis inhibitor [Source:MGI Symbol;Acc:MGI:2442963]	0.5301	2954	GO:0016525		GO:0005576	ISM1	319909	TRUE	0.530093	2.97449e-06	0.000362566	chr2
ENSMUSG00000023828	ENSMUST00000233535; ENSMUST00000024595	Slc22a3	protein_coding	protein_coding	solute carrier family 22 (organic cation transporter), member 3 [Source:MGI Symbol;Acc:MGI:1333817]	0.5108	3816	GO:0055085; GO:0006811; GO:0051649; GO:0071705; GO:0006836; GO:1901998; GO:0042908; GO:0015711; GO:0015695; GO:0015697; GO:0015844; GO:0015872; GO:0051610; GO:0090494; GO:0051608; GO:0051615; GO:0051620; GO:0032098; GO:0051625; GO:0015718; GO:0015850; GO:0006837	GO:0022857; GO:0015101; GO:0005326; GO:0008514; GO:0019534; GO:0005330; GO:0008504; GO:0015651	GO:0016020; GO:0016021; GO:0005886; GO:0005887; GO:0098793; GO:0043025	SLC22A3	20519	TRUE	0.741226	3.24001e-06	0.000389673	chr17
ENSMUSG00000028677	ENSMUST00000030439; ENSMUST00000102690; ENSMUST00000221654; ENSMUST00000094853; ENSMUST00000128122; ENSMUST00000223371; ENSMUST00000221157; ENSMUST00000151829; ENSMUST00000223182; ENSMUST00000154974; ENSMUST00000133971; ENSMUST00000150148; ENSMUST00000138435; ENSMUST00000123222	Rnf220	protein_coding	protein_coding	ring finger protein 220 [Source:MGI Symbol;Acc:MGI:1913993]	0.5679	1300	GO:0016567; GO:0051865; GO:0051091; GO:0006513; GO:0090263; GO:2000677; GO:0021904; GO:0003358	GO:0005515; GO:0016740; GO:0046872; GO:0004842; GO:0061630; GO:0008013	GO:0005634; GO:0005737; GO:0032991; GO:0005652	RNF220	66743	TRUE	0.187057	3.25016e-06	0.000389673	chr4
ENSMUSG00000038650	ENSMUST00000210314; ENSMUST00000106033; ENSMUST00000167493; ENSMUST00000209378; ENSMUST00000210979	Rnh1	protein_coding	protein_coding	ribonuclease/angiogenin inhibitor 1 [Source:MGI Symbol;Acc:MGI:1195456]	0.5529	1338	GO:0043086; GO:0045765	GO:0005515; GO:0008428	GO:0005737; GO:0005654; GO:0005829; GO:0032311	RNH1	107702	TRUE	0.288921	3.32864e-06	0.000394646	chr7
ENSMUSG00000029406	ENSMUST00000086123; ENSMUST00000162812; ENSMUST00000161273; ENSMUST00000161938; ENSMUST00000159628; ENSMUST00000161479; ENSMUST00000159010; ENSMUST00000159677; ENSMUST00000161530; ENSMUST00000161644	Pitpnm2	protein_coding	protein_coding	phosphatidylinositol transfer protein, membrane-associated 2 [Source:MGI Symbol;Acc:MGI:1336192]	0.5849	3710	GO:0015914; GO:0120009; GO:0048015	GO:0046872; GO:0005548; GO:0008289; GO:0005515; GO:0005509; GO:0030971; GO:0005543; GO:0035091; GO:0008525; GO:0008526; GO:0031210	GO:0005737; GO:0016020; GO:0110165; GO:0005856; GO:0012505; GO:0044297	PITPNM2	19679	TRUE	0.220296	3.3456e-06	0.000394646	chr5
ENSMUSG00000021696	ENSMUST00000022207; ENSMUST00000225550	Elovl7	protein_coding	protein_coding	ELOVL family member 7, elongation of long chain fatty acids (yeast) [Source:MGI Symbol;Acc:MGI:1921809]	0.4296	3182	GO:0019367; GO:0042761; GO:0006629; GO:0006631; GO:0006633; GO:0008610; GO:0044249; GO:0044255; GO:0006636; GO:0034626; GO:0030148; GO:0034625; GO:0035338; GO:0006556	GO:0009922; GO:0016740; GO:0102756; GO:0102336	GO:0016021; GO:0005783; GO:0016020; GO:0005789; GO:0030176	ELOVL7	74559	TRUE	-0.389094	3.37426e-06	0.000394842	chr13
ENSMUSG00000015766	ENSMUST00000058210; ENSMUST00000100841; ENSMUST00000111878; ENSMUST00000147526; ENSMUST00000127179; ENSMUST00000132920; ENSMUST00000152046; ENSMUST00000146442; ENSMUST00000153933; ENSMUST00000203515; ENSMUST00000139753; ENSMUST00000134630; ENSMUST00000205037	Eps8	protein_coding	protein_coding	epidermal growth factor receptor pathway substrate 8 [Source:MGI Symbol;Acc:MGI:104684]	0.4849	1930	GO:1990830; GO:0008344; GO:0008360; GO:0051016; GO:0051017; GO:0035023; GO:0031532; GO:0016601; GO:0007266; GO:0099072; GO:0048149; GO:0036336; GO:0070358; GO:0010458; GO:0030832; GO:0051764; GO:1900029	GO:0005515; GO:0003779; GO:0035591; GO:0031267	GO:0045202; GO:0014069; GO:0005737; GO:0016020; GO:0005886; GO:0110165; GO:0030426; GO:0042995; GO:0043005; GO:0005938; GO:0098978; GO:0032587; GO:0005829; GO:0032420; GO:0017146; GO:0005903; GO:0032421; GO:0032426	EPS8	13860	TRUE	0.260704	3.4624e-06	0.000401941	chr6
ENSMUSG00000026805	ENSMUST00000050776; ENSMUST00000124059; ENSMUST00000113849; ENSMUST00000113847; ENSMUST00000174027	Barhl1	protein_coding	protein_coding	BarH like homeobox 1 [Source:MGI Symbol;Acc:MGI:1859288]	0.6187	2249	GO:0006355; GO:0007605; GO:0045944; GO:0043524; GO:0051402; GO:0006357; GO:0001764; GO:0030901; GO:1905584; GO:1905586	GO:0003677; GO:0000981; GO:0000977; GO:0001228; GO:1990837	GO:0005634	BARHL1	54422	TRUE	-3.23065	3.57758e-06	0.000412041	chr2
ENSMUSG00000071540	ENSMUST00000096038; ENSMUST00000226958	3425401B19Rik	protein_coding	protein_coding	RIKEN cDNA 3425401B19 gene [Source:MGI Symbol;Acc:MGI:3588196]	0.5414	2968	GO:0070886	GO:0003674	GO:0005737; GO:0030018	C10orf71	100504518	TRUE	1.59705	3.69865e-06	0.000422657	chr14
ENSMUSG00000049577	ENSMUST00000054052; ENSMUST00000176883; ENSMUST00000177356; ENSMUST00000176690; ENSMUST00000212315	Zfpm1	protein_coding	protein_coding	zinc finger protein, multitype 1 [Source:MGI Symbol;Acc:MGI:1095400]	0.6221	1166	GO:0045944; GO:0030218; GO:0030851; GO:0032729; GO:0000122; GO:0048872; GO:0007507; GO:0032713; GO:0006357; GO:0048731; GO:0030154; GO:0048513; GO:0010604; GO:0009653; GO:0045595; GO:0030220; GO:0035855; GO:0030219; GO:0035162; GO:0060412; GO:0060413; GO:0003151; GO:0003181; GO:0003192; GO:0003195; GO:0010724; GO:0032091; GO:0032642; GO:0045599; GO:0055008; GO:0060318; GO:0060319; GO:0060377	GO:0005515; GO:0003677; GO:0046872; GO:0061629; GO:0003714	GO:0005634; GO:0005667; GO:0017053	ZFPM1	22761	TRUE	0.267831	3.85583e-06	0.000434883	chr8
ENSMUSG00000058672	ENSMUST00000056427	Tubb2a	protein_coding	protein_coding	tubulin, beta 2A class IIA [Source:MGI Symbol;Acc:MGI:107861]	0.5522	1610	GO:0007017; GO:0000226; GO:0000278; GO:0001764	GO:0005525; GO:0000166; GO:0005200; GO:0003924	GO:0005874; GO:0005737; GO:0015630; GO:0045171; GO:0005856; GO:0072686	TUBB2A	22151	TRUE	0.237418	3.8651e-06	0.000434883	chr13
ENSMUSG00000021732	ENSMUST00000128103; ENSMUST00000146674; ENSMUST00000022246	Fgf10	protein_coding	protein_coding	fibroblast growth factor 10 [Source:MGI Symbol;Acc:MGI:1099809]	0.4169	1730	GO:0030324; GO:0016055; GO:0045944; GO:0048146; GO:0010468; GO:2000648; GO:0060173; GO:0070371; GO:0050679; GO:0072089; GO:0008283; GO:0060541; GO:0030857; GO:0035019; GO:0060430; GO:0050673; GO:0048538; GO:0010838; GO:0043410; GO:0030154; GO:0097192; GO:0042472; GO:0008284; GO:0046579; GO:0008543; GO:0042060; GO:0050731; GO:0070374; GO:2001240; GO:0000278; GO:0048514; GO:0008544; GO:0030878; GO:…	GO:0008083; GO:0005515; GO:0008201; GO:0005104; GO:0042056; GO:0005111	GO:0005634; GO:0005576; GO:0005886; GO:0005615; GO:0009986; GO:0005737; GO:0062023	FGF10	14165	TRUE	0.926324	3.93582e-06	0.00043946	chr13
ENSMUSG00000020411	ENSMUST00000020679	Nipal4	protein_coding	protein_coding	NIPA-like domain containing 4 [Source:MGI Symbol;Acc:MGI:2444671]	0.5099	3444	GO:0015693; GO:0006811; GO:1903830	GO:0015095; GO:0003674	GO:0016021; GO:0016020	NIPAL4	214112	TRUE	-0.418157	4.01544e-06	0.000443113	chr11
ENSMUSG00000033022	ENSMUST00000035804; ENSMUST00000234819; ENSMUST00000234064; ENSMUST00000234179; ENSMUST00000234222	Cdo1	protein_coding	protein_coding	cysteine dioxygenase 1, cytosolic [Source:MGI Symbol;Acc:MGI:105925]	0.5081	991	GO:0051384; GO:0045471; GO:0042412; GO:0051591; GO:0007595; GO:0019448; GO:0033762; GO:0043200; GO:0010243; GO:0019452; GO:0019530	GO:0005506; GO:0016702; GO:0046872; GO:0016491; GO:0051213; GO:0008270; GO:0017172; GO:0008198; GO:0016151	GO:0005829; GO:0005886	CDO1	12583	TRUE	0.292299	4.02912e-06	0.000443113	chr18
ENSMUSG00000028541	ENSMUST00000084325; ENSMUST00000167443; ENSMUST00000030266; ENSMUST00000106421; ENSMUST00000153358; ENSMUST00000137016; ENSMUST00000171548	B4galt2	protein_coding	protein_coding	UDP-Gal:betaGlcNAc beta 1,4- galactosyltransferase, polypeptide 2 [Source:MGI Symbol;Acc:MGI:1858493]	0.6091	1794	GO:0007626; GO:0006486; GO:0005975; GO:0007420; GO:0007613; GO:0008542; GO:0021680; GO:0070085	GO:0016740; GO:0016757; GO:0046872; GO:0003831; GO:0003945; GO:0004461; GO:0008378	GO:0005654; GO:0016020; GO:0016021; GO:0000139; GO:0005794; GO:0043231; GO:0032580	B4GALT2	53418	TRUE	0.247798	4.09594e-06	0.000447099	chr4
ENSMUSG00000031453	ENSMUST00000117551; ENSMUST00000137822; ENSMUST00000127418; ENSMUST00000132637; ENSMUST00000154454; ENSMUST00000132439	Rasa3	protein_coding	protein_coding	RAS p21 protein activator 3 [Source:MGI Symbol;Acc:MGI:1197013]	0.5488	1565	GO:0035556; GO:0043087; GO:0007165; GO:0034605; GO:0046580; GO:0051209	GO:0046872; GO:0005096; GO:0015278	GO:0031235	RASA3	19414	TRUE	-0.191291	4.1648e-06	0.000451248	chr8
ENSMUSG00000024713	ENSMUST00000025618; ENSMUST00000050715; ENSMUST00000235828; ENSMUST00000237115; ENSMUST00000235505	Pcsk5	protein_coding	protein_coding	proprotein convertase subtilisin/kexin type 5 [Source:MGI Symbol;Acc:MGI:97515]	0.499	4662	GO:0006508; GO:0001822; GO:0016485; GO:0009952; GO:0003279; GO:0060976; GO:0007368; GO:0048706; GO:0007507; GO:0016486; GO:1904754; GO:0007565; GO:0048566; GO:2001046; GO:0043043; GO:0006465; GO:0033625; GO:0007566; GO:0019058; GO:0030323; GO:0035108; GO:0140447; GO:1905609	GO:0008236; GO:0004252; GO:0016787; GO:0008233; GO:0004175; GO:0042277	GO:0016020; GO:0016021; GO:0005886; GO:0005794; GO:0005576; GO:0012505; GO:0005788; GO:0043204; GO:0005802; GO:0005615; GO:0030173; GO:0005797; GO:1990635	PCSK5	18552	TRUE	0.708482	4.26539e-06	0.000458749	chr19
ENSMUSG00000003271	ENSMUST00000075571; ENSMUST00000209739; ENSMUST00000210754; ENSMUST00000210147; ENSMUST00000209435; ENSMUST00000209464; ENSMUST00000210021; ENSMUST00000211779	Sult2b1	protein_coding	protein_coding	sulfotransferase family, cytosolic, 2B, member 1 [Source:MGI Symbol;Acc:MGI:1926342]	0.5438	1097	GO:0008285; GO:0006629; GO:0008202; GO:0008203; GO:0050427; GO:0051923; GO:0000103; GO:0045606	GO:0008146; GO:0016740; GO:0036094; GO:0050294; GO:0015485; GO:0003676; GO:1990239; GO:0004027; GO:0051922	GO:0005829; GO:0005634; GO:0005737; GO:0005783; GO:0043231	SULT2B1	54200	TRUE	0.724435	4.32278e-06	0.000461528	chr7
ENSMUSG00000028785	ENSMUST00000095807; ENSMUST00000116444; ENSMUST00000030572; ENSMUST00000164649; ENSMUST00000116442; ENSMUST00000139450; ENSMUST00000125931; ENSMUST00000149763; ENSMUST00000135763	Hpca	protein_coding	protein_coding	hippocalcin [Source:MGI Symbol;Acc:MGI:1336200]	0.5753	1203	GO:0099149; GO:0071277; GO:1901385; GO:0048839; GO:0045762; GO:0090314; GO:0010518; GO:0031584; GO:0031283; GO:1904009; GO:0007420; GO:0014070; GO:0019722; GO:0060041; GO:0071257; GO:1901986; GO:1902065; GO:1904010	GO:0005509; GO:0005515; GO:0046872; GO:0003779; GO:0042802; GO:0019900	GO:0005829; GO:0005737; GO:0030424; GO:0016020; GO:0098978; GO:0019898; GO:0043204; GO:0098794; GO:0032809; GO:0032839; GO:0032590; GO:0044327	HPCA	15444	TRUE	-1.05513	4.5025e-06	0.000477233	chr4
ENSMUSG00000027419	ENSMUST00000028905; ENSMUST00000124751	Pcsk2	protein_coding	protein_coding	proprotein convertase subtilisin/kexin type 2 [Source:MGI Symbol;Acc:MGI:97512]	0.4418	4204	GO:0006508; GO:0016485; GO:0016486; GO:0007399; GO:0016540; GO:0030070; GO:0034230; GO:0034231	GO:0008236; GO:0004252; GO:0016787; GO:0008233; GO:0004175	GO:0005654; GO:0005615; GO:0031410; GO:0043231; GO:0005576; GO:0016020; GO:0043025; GO:0005788; GO:0043005; GO:0030425; GO:0030141; GO:0043204; GO:0030133; GO:0034774	PCSK2	18549	TRUE	0.345676	4.67328e-06	0.000490484	chr2
ENSMUSG00000045193	ENSMUST00000154726; ENSMUST00000105365; ENSMUST00000054666; ENSMUST00000139935; ENSMUST00000140774; ENSMUST00000151321; ENSMUST00000147190	Cirbp	protein_coding	protein_coding	cold inducible RNA binding protein [Source:MGI Symbol;Acc:MGI:893588]	0.5781	764	GO:0070417; GO:0045727; GO:0048026; GO:0030308; GO:0048255; GO:0009411; GO:1902806; GO:0017148; GO:0034063	GO:0003723; GO:0003676; GO:0003730; GO:0008266; GO:0030371; GO:0070181	GO:0005634; GO:0005737; GO:0005654; GO:0005681; GO:0010494	CIRBP	12696	TRUE	0.464697	4.69459e-06	0.000490484	chr10
ENSMUSG00000060206	ENSMUST00000133895; ENSMUST00000098070; ENSMUST00000030131; ENSMUST00000079605	Zfp462	protein_coding	protein_coding	zinc finger protein 462 [Source:MGI Symbol;Acc:MGI:107690]	0.5148	5084	GO:0045944; GO:0006325; GO:0010468; GO:0043392	GO:0003677; GO:0046872	GO:0005634	ZNF462	242466	TRUE	-0.21537	4.85445e-06	0.000503589	chr4
ENSMUSG00000004085	ENSMUST00000090824; ENSMUST00000135469; ENSMUST00000112073; ENSMUST00000150126; ENSMUST00000135204; ENSMUST00000144111	Map3k20	protein_coding	protein_coding	mitogen-activated protein kinase kinase kinase 20 [Source:MGI Symbol;Acc:MGI:2443258]	0.4853	2351	GO:0006468; GO:0060173; GO:0016310; GO:0007049; GO:0043065; GO:0035556; GO:0007010; GO:0007254; GO:0051403; GO:0042733; GO:0000077; GO:0071480; GO:0038066; GO:1904291	GO:0005515; GO:0005524; GO:0004672; GO:0016740; GO:0046872; GO:0000166; GO:0016301; GO:0004674; GO:0004709; GO:0000287; GO:0106310; GO:0004706	GO:0005634; GO:0005829; GO:0005737	MAP3K20	65964	TRUE	-0.389888	5.1144e-06	0.000524532	chr2
ENSMUSG00000056492	ENSMUST00000226087; ENSMUST00000113599; ENSMUST00000224278; ENSMUST00000225466; ENSMUST00000225962; ENSMUST00000225004	Adgrf5	protein_coding	protein_coding	adhesion G protein-coupled receptor F5 [Source:MGI Symbol;Acc:MGI:2182928]	0.4925	3396	GO:0007186; GO:0007166; GO:0042116; GO:0007189; GO:0042593; GO:0043129; GO:0045444; GO:0003094; GO:0048821; GO:0006112; GO:0008654; GO:0019216; GO:0043031; GO:0061626; GO:0071073	GO:0004930; GO:0004888; GO:0003674	GO:0016021; GO:0016020; GO:0005886; GO:0009986; GO:0045177; GO:0031410	ADGRF5	224792	TRUE	-0.433512	5.14141e-06	0.000524532	chr17
ENSMUSG00000026407	ENSMUST00000160641; ENSMUST00000112068; ENSMUST00000112064; ENSMUST00000161865; ENSMUST00000161700; ENSMUST00000159106	Cacna1s	protein_coding	protein_coding	calcium channel, voltage-dependent, L type, alpha 1S subunit [Source:MGI Symbol;Acc:MGI:88294]	0.5536	4182	GO:0055085; GO:0006811; GO:0055001; GO:0001501; GO:0007519; GO:0048741; GO:0034765; GO:0003008; GO:0006816; GO:0070588; GO:0006936; GO:0006941; GO:0071313; GO:0007528; GO:0098703; GO:0007029; GO:0007520; GO:0045933; GO:0002074; GO:0043501	GO:0005216; GO:0046872; GO:0036094; GO:0005244; GO:0005245; GO:0005262; GO:0005516; GO:0140677; GO:0008331	GO:0016020; GO:0005737; GO:0016021; GO:0005886; GO:0005891; GO:0030315; GO:0042383; GO:0016529; GO:0031674; GO:1990454; GO:0044327	CACNA1S	12292	TRUE	0.677029	5.16392e-06	0.000524532	chr1
ENSMUSG00000070803	ENSMUST00000094814	Cited4	protein_coding	protein_coding	Cbp/p300-interacting transactivator, with Glu/Asp-rich carboxy-terminal domain, 4 [Source:MGI Symbol;Acc:MGI:1861694]	0.6637	1249	GO:0006355; GO:0045893; GO:0043627	GO:0003713	GO:0005634; GO:0005737	CITED4	56222	TRUE	0.728797	5.30444e-06	0.00053509	chr4
ENSMUSG00000030083	ENSMUST00000032169; ENSMUST00000203137; ENSMUST00000203272; ENSMUST00000204560; ENSMUST00000203120; ENSMUST00000204327; ENSMUST00000205082; ENSMUST00000204458; ENSMUST00000203514; ENSMUST00000203864; ENSMUST00000203460; ENSMUST00000204932	Abtb1	protein_coding	protein_coding	ankyrin repeat and BTB (POZ) domain containing 1 [Source:MGI Symbol;Acc:MGI:1933148]	0.585	1143		GO:0005515	GO:0005730; GO:0005829; GO:0005886	ABTB1	80283	TRUE	0.332137	5.61783e-06	0.000562822	chr6
ENSMUSG00000030930	ENSMUST00000077472; ENSMUST00000080215; ENSMUST00000132508; ENSMUST00000207068	Chst15	protein_coding	protein_coding	carbohydrate sulfotransferase 15 [Source:MGI Symbol;Acc:MGI:1924840]	0.5227	2892	GO:0019319	GO:0016740; GO:0050656; GO:0050659	GO:0016020; GO:0016021; GO:0000139; GO:0005794	CHST15	77590	TRUE	-0.523985	5.72283e-06	0.000569441	chr7
ENSMUSG00000072235	ENSMUST00000097014	Tuba1a	protein_coding	protein_coding	tubulin, alpha 1A [Source:MGI Symbol;Acc:MGI:98869]	0.5324	1803	GO:0007017; GO:0000226; GO:0000278; GO:0050807	GO:0005525; GO:0000166; GO:0005515; GO:0005200; GO:0042802; GO:0019904	GO:0005874; GO:0005737; GO:0015630; GO:0005856; GO:0055037; GO:0005881; GO:0045121; GO:0043209; GO:0036464; GO:0031594	TUBA1A	22142	TRUE	0.179388	6.13279e-06	0.000606111	chr15
ENSMUSG00000026830	ENSMUST00000090940	Ermn	protein_coding	protein_coding	ermin, ERM-like protein [Source:MGI Symbol;Acc:MGI:1925017]	0.3802	3635	GO:0007015; GO:0008360; GO:0001763; GO:0031344	GO:0003779; GO:0051015	GO:0005737; GO:0043025; GO:0005938; GO:0005856; GO:0030175; GO:0033270; GO:0098858; GO:0097386; GO:0043209; GO:0033269	ERMN	77767	TRUE	-0.402664	6.20072e-06	0.000608711	chr2
ENSMUSG00000062252	ENSMUST00000232862; ENSMUST00000080780; ENSMUST00000232974	Lhfpl5	protein_coding	protein_coding	lipoma HMGIC fusion partner-like 5 [Source:MGI Symbol;Acc:MGI:1915382]	0.5511	1449	GO:0007605; GO:0006811; GO:0050910; GO:0060088; GO:0050974	GO:0005515	GO:0016020; GO:0016021; GO:0005886; GO:0016324; GO:0032421; GO:0032426	LHFPL5	328789	TRUE	0.479603	6.2671e-06	0.000611126	chr17
ENSMUSG00000051359	ENSMUST00000168992; ENSMUST00000090150; ENSMUST00000120746; ENSMUST00000119730; ENSMUST00000116445; ENSMUST00000153775; ENSMUST00000148652; ENSMUST00000132423; ENSMUST00000150453; ENSMUST00000226924; ENSMUST00000137944; ENSMUST00000123317	Ncald	protein_coding	protein_coding	neurocalcin delta [Source:MGI Symbol;Acc:MGI:1196326]	0.4854	1898	GO:0019722; GO:0003073	GO:0005509; GO:0046872; GO:0003779; GO:0015631; GO:0043014; GO:0030276	GO:0005829	NCALD	52589	TRUE	0.286971	6.34228e-06	0.000611331	chr15
ENSMUSG00000022490	ENSMUST00000023133; ENSMUST00000228813	Ppp1r1a	protein_coding	protein_coding	protein phosphatase 1, regulatory inhibitor subunit 1A [Source:MGI Symbol;Acc:MGI:1889595]	0.562	1064	GO:0007165; GO:0043086; GO:0035556; GO:0005975; GO:0005977	GO:0004864; GO:0005515	GO:0005737; GO:0005615	PPP1R1A	58200	TRUE	0.342483	6.35279e-06	0.000611331	chr15
ENSMUSG00000043531	ENSMUST00000209413; ENSMUST00000072685; ENSMUST00000211687; ENSMUST00000164039; ENSMUST00000168357; ENSMUST00000211008; ENSMUST00000111756; ENSMUST00000209783	Sorcs1	protein_coding	protein_coding	sortilin-related VPS10 domain containing receptor 1 [Source:MGI Symbol;Acc:MGI:1929666]	0.4925	4560			GO:0016020; GO:0016021	SORCS1	58178	TRUE	-0.250572	6.4554e-06	0.00061591	chr19
ENSMUSG00000050288	ENSMUST00000057893	Fzd2	protein_coding	protein_coding	frizzled class receptor 2 [Source:MGI Symbol;Acc:MGI:1888513]	0.5662	3663	GO:0007166; GO:0016055; GO:0060070; GO:0060412; GO:0007165; GO:0007186; GO:0007608; GO:0045893; GO:0007204; GO:0051091; GO:0003151; GO:0090179; GO:0007267; GO:0003149; GO:0003150; GO:0045446; GO:0060022; GO:0060119; GO:0007199; GO:0007223; GO:0090103	GO:0005515; GO:0004888; GO:0004930; GO:0042802; GO:0042813; GO:0030165; GO:0046982; GO:0017147	GO:0016020; GO:0016021; GO:0005737; GO:0005886	FZD2	57265	TRUE	-0.704181	6.48459e-06	0.00061591	chr11
ENSMUSG00000041607	ENSMUST00000091789; ENSMUST00000114676; ENSMUST00000047865; ENSMUST00000143506; ENSMUST00000152071; ENSMUST00000142850; ENSMUST00000080658; ENSMUST00000133193; ENSMUST00000123251; ENSMUST00000153478; ENSMUST00000075372; ENSMUST00000102812; ENSMUST00000062446; ENSMUST00000114674; ENSMUST00000132369; ENSMUST00000150952	Mbp	protein_coding	protein_coding	myelin basic protein [Source:MGI Symbol;Acc:MGI:96925]	0.5566	1540	GO:0007605; GO:0042552; GO:0032755; GO:0000165; GO:0050771; GO:0009636; GO:0032570; GO:0034115; GO:0035633; GO:0061024; GO:1904685; GO:2000343	GO:0019911; GO:0005516; GO:0008289; GO:0002020	GO:0005634; GO:0005737; GO:0016020; GO:0071944; GO:0005886; GO:0043025; GO:0032991; GO:0009986; GO:0043209; GO:0042995; GO:0043218; GO:0033269	MBP	17196	TRUE	-0.284195	6.56863e-06	0.000619866	chr18
ENSMUSG00000055945	ENSMUST00000232566; ENSMUST00000069742; ENSMUST00000163887	Prr18	protein_coding	protein_coding	proline rich 18 [Source:MGI Symbol;Acc:MGI:2443403]	0.6134	2373	GO:0008150	GO:0003674	GO:0005575	PRR18	320111	TRUE	-0.27095	6.88066e-06	0.00064515	chr17
ENSMUSG00000071984	ENSMUST00000097425; ENSMUST00000240702; ENSMUST00000239425; ENSMUST00000097424; ENSMUST00000114579; ENSMUST00000167580	Fndc1	protein_coding	protein_coding	fibronectin type III domain containing 1 [Source:MGI Symbol;Acc:MGI:1915905]	0.5401	3941	GO:0071456; GO:0051223; GO:0001934; GO:0010666	GO:0005515; GO:0003674	GO:0016607; GO:0005737; GO:0005886; GO:0005911; GO:0031966	FNDC1	68655	TRUE	-0.899775	7.04375e-06	0.000656235	chr17
ENSMUSG00000047281	ENSMUST00000057311	Sfn	protein_coding	protein_coding	stratifin [Source:MGI Symbol;Acc:MGI:1891831]	0.597	1613	GO:0051726; GO:0043154; GO:0072089; GO:0043588; GO:0007165; GO:0008104; GO:0003334; GO:0010482; GO:0010839; GO:0043616; GO:0045606; GO:0061436; GO:2000647; GO:0030216; GO:0031424; GO:0046827; GO:0008630; GO:0001836; GO:0030307; GO:0000079	GO:0005515; GO:0042802; GO:0019901; GO:0051219	GO:0005829; GO:0005634; GO:0005737; GO:0005576	SFN	55948	TRUE	-0.69063	7.24805e-06	0.000670995	chr4
ENSMUSG00000032517	ENSMUST00000068698; ENSMUST00000215512; ENSMUST00000111627; ENSMUST00000093773; ENSMUST00000174193; ENSMUST00000214943; ENSMUST00000214008	Mobp	protein_coding	protein_coding	myelin-associated oligodendrocytic basic protein [Source:MGI Symbol;Acc:MGI:108511]	0.525	1345	GO:0007399; GO:0032289	GO:0003779; GO:0017022; GO:0019911	GO:0005739; GO:0005737; GO:0048471; GO:0030864; GO:0043209; GO:0005829	MOBP	17433	TRUE	-0.357076	7.44567e-06	0.000684955	chr9
ENSMUSG00000025422	ENSMUST00000239120; ENSMUST00000039259; ENSMUST00000217941	Agap2	protein_coding	protein_coding	ArfGAP with GTPase domain, ankyrin repeat and PH domain 2 [Source:MGI Symbol;Acc:MGI:3580016]	0.6194	5094	GO:0050790; GO:0043066; GO:0045944; GO:0006915; GO:0043524; GO:0007259; GO:0033598; GO:0033601; GO:0042177; GO:0045860; GO:2001240; GO:0090630; GO:0032147; GO:0016197; GO:0043552; GO:0014068; GO:1904019; GO:1904036; GO:0030036; GO:2000010; GO:0060749; GO:0046427; GO:1905430	GO:0005515; GO:0005525; GO:0005096; GO:0003924; GO:0046872; GO:0044877; GO:0000166; GO:0005524; GO:0019901; GO:0035014; GO:0030295	GO:0005634; GO:0005829; GO:0005737; GO:0005654; GO:0009897; GO:0005768; GO:0030425; GO:0090543	AGAP2	216439	TRUE	0.237446	7.91983e-06	0.000724021	chr10
ENSMUSG00000045005	ENSMUST00000063982; ENSMUST00000116133	Fzd5	protein_coding	protein_coding	frizzled class receptor 5 [Source:MGI Symbol;Acc:MGI:108571]	0.5746	4905	GO:0007166; GO:0016055; GO:0045944; GO:0060070; GO:0032729; GO:0008285; GO:0001525; GO:0007165; GO:0007186; GO:0030154; GO:0060716; GO:0031076; GO:0043507; GO:0001944; GO:0060718; GO:0099054; GO:0002071; GO:1901382; GO:0060670; GO:0032731; GO:0032760; GO:0060715; GO:2000810; GO:0002726; GO:0033077; GO:0060574; GO:0071219; GO:0060561; GO:0000578; GO:1905114; GO:0008595; GO:0031077; GO:0048596; GO:…	GO:0005515; GO:0004888; GO:0044877; GO:0004930; GO:0008289; GO:0017147; GO:0042813; GO:0019901; GO:0031625; GO:0001540	GO:0016020; GO:0016021; GO:0045202; GO:0000139; GO:0005794; GO:0005886; GO:0009986; GO:0042995; GO:0030425; GO:0043204; GO:0030424; GO:0005887; GO:0098978; GO:0005923; GO:0048471; GO:0005769	FZD5	14367	TRUE	-1.67883	8.25682e-06	0.000747988	chr1
ENSMUSG00000062825	ENSMUST00000071555; ENSMUST00000106215; ENSMUST00000062147; ENSMUST00000089616; ENSMUST00000131103; ENSMUST00000128055; ENSMUST00000141406; ENSMUST00000156343; ENSMUST00000144868	Actg1	protein_coding	protein_coding	actin, gamma, cytoplasmic 1 [Source:MGI Symbol;Acc:MGI:87906]	0.5596	1035	GO:0010628; GO:0071346; GO:0001525; GO:0045214; GO:0090303; GO:0030335; GO:0051893; GO:0051492; GO:0048488; GO:1902396; GO:0001738; GO:0098974; GO:0120192; GO:0150111; GO:0009612; GO:0051592	GO:0000166; GO:0005524; GO:0005515; GO:0042802; GO:0005200; GO:0031625; GO:0005522; GO:0098973	GO:0070062; GO:0005737; GO:0005856; GO:0005911; GO:0045177; GO:0030016; GO:0015629; GO:0045335; GO:0043209; GO:0005829; GO:0043296; GO:0031941; GO:0098685; GO:0005886; GO:0005925; GO:0097433; GO:0005884; GO:0098871; GO:0043034; GO:0044305; GO:0099143; GO:0120220	ACTG1	11465	TRUE	0.208844	8.28427e-06	0.000747988	chr11
ENSMUSG00000027188	ENSMUST00000028612; ENSMUST00000139090; ENSMUST00000144333; ENSMUST00000143071	Pamr1	protein_coding	protein_coding	peptidase domain containing associated with muscle regeneration 1 [Source:MGI Symbol;Acc:MGI:2445082]	0.4971	1934	GO:0006508	GO:0004252; GO:0005509	GO:0005576	PAMR1	210622	TRUE	0.60343	8.40477e-06	0.000754212	chr2
ENSMUSG00000048355	ENSMUST00000057625	Arxes1	protein_coding	protein_coding	adipocyte-related X-chromosome expressed sequence 1 [Source:MGI Symbol;Acc:MGI:1923469]	0.4538	1580	GO:0006465; GO:0045444; GO:0045047		GO:0016021; GO:0005787; GO:0016020; GO:0005783; GO:0005789		76219	TRUE	0.255781	9.20418e-06	0.000820912	chrX
ENSMUSG00000033542	ENSMUST00000031750; ENSMUST00000182924; ENSMUST00000183227; ENSMUST00000183094; ENSMUST00000182190; ENSMUST00000182752; ENSMUST00000183313; ENSMUST00000182647	Arhgef5	protein_coding	protein_coding	Rho guanine nucleotide exchange factor (GEF) 5 [Source:MGI Symbol;Acc:MGI:1858952]	0.482	2286	GO:0035556; GO:0043547; GO:0051091; GO:0043087; GO:0051493; GO:0090630; GO:0061484; GO:0032956; GO:0051496; GO:0030036; GO:0002408; GO:0043507; GO:0071803; GO:1904591; GO:0050790	GO:0005515; GO:0005085; GO:0008289	GO:0005634; GO:0005829; GO:0005737; GO:0005654; GO:0005886; GO:0071944; GO:0070161; GO:0042995; GO:0002102	ARHGEF5	54324	TRUE	0.724006	9.31604e-06	0.000825853	chr6
ENSMUSG00000058192	ENSMUST00000214194; ENSMUST00000115557; ENSMUST00000140668; ENSMUST00000217655; ENSMUST00000060063	Zfp846	protein_coding	protein_coding	zinc finger protein 846 [Source:MGI Symbol;Acc:MGI:1924012]	0.4645	3736	GO:0006355; GO:0006357	GO:0046872; GO:0000978; GO:0000981	GO:0005634	ZNF846	244721	TRUE	-0.270052	1.00019e-05	0.000876359	chr9
ENSMUSG00000035033	ENSMUST00000136867; ENSMUST00000048934; ENSMUST00000102737; ENSMUST00000131538	Tbr1	protein_coding	protein_coding	T-box brain transcription factor 1 [Source:MGI Symbol;Acc:MGI:107404]	0.5479	1887	GO:0006355; GO:0045893; GO:0045944; GO:0010467; GO:0010468; GO:0030182; GO:0006357; GO:0006338; GO:0045892; GO:0016575; GO:0010975; GO:1902667; GO:0001708; GO:0021987; GO:0021902; GO:0030902; GO:0001661; GO:0021764; GO:0010092	GO:0003700; GO:0000978; GO:0003677; GO:0000981; GO:0019901; GO:0001228; GO:0031490	GO:0005634	TBR1	21375	TRUE	1.05262	1.00077e-05	0.000876359	chr2
ENSMUSG00000069729	ENSMUST00000124362; ENSMUST00000092723; ENSMUST00000232180; ENSMUST00000115797; ENSMUST00000115799; ENSMUST00000156775; ENSMUST00000146703	Arid1b	protein_coding	protein_coding	AT rich interactive domain 1B (SWI-like) [Source:MGI Symbol;Acc:MGI:1926129]	0.5666	5435	GO:0006338; GO:0006357; GO:0030071; GO:0045582; GO:0045597; GO:0045663; GO:0070316; GO:2000045; GO:2000781; GO:2000819; GO:0002931; GO:1904385; GO:0007399; GO:0045893; GO:0006325; GO:0060996; GO:0007270; GO:0097026	GO:0003677; GO:0005515; GO:0031491	GO:0005634; GO:0016514; GO:0071565; GO:0044815; GO:0070603; GO:0035060; GO:0000785; GO:0071564; GO:0140092; GO:0005737; GO:0005829; GO:0005654; GO:0045202; GO:0005886	ARID1B	239985	TRUE	-0.169844	1.00655e-05	0.000876359	chr17
ENSMUSG00000024187	ENSMUST00000114988; ENSMUST00000234262; ENSMUST00000234554; ENSMUST00000234687; ENSMUST00000141240; ENSMUST00000234175; ENSMUST00000118487; ENSMUST00000153582; ENSMUST00000151293	Fam234a	protein_coding	protein_coding	family with sequence similarity 234, member A [Source:MGI Symbol;Acc:MGI:2146854]	0.5488	2357	GO:0008150	GO:0003674	GO:0016020; GO:0016021; GO:0009986	FAM234A	106581	TRUE	-0.234099	1.02198e-05	0.000884524	chr17
ENSMUSG00000053465	ENSMUST00000065904	Hs6st3	protein_coding	protein_coding	heparan sulfate 6-O-sulfotransferase 3 [Source:MGI Symbol;Acc:MGI:1354960]	0.5849	1708	GO:0015012; GO:0015015	GO:0008146; GO:0016740; GO:0017095	GO:0016021; GO:0016020; GO:0005794	HS6ST3	50787	TRUE	-0.408793	1.04496e-05	0.000894877	chr14
ENSMUSG00000029108	ENSMUST00000191837; ENSMUST00000068110; ENSMUST00000094783; ENSMUST00000192287; ENSMUST00000195156; ENSMUST00000199310; ENSMUST00000192048	Pcdh7	protein_coding	protein_coding	protocadherin 7 [Source:MGI Symbol;Acc:MGI:1860487]	0.4887	3496	GO:0007156; GO:0007155	GO:0005509; GO:0005515	GO:0016020; GO:0005886; GO:0016021; GO:0005887	PCDH7	54216	TRUE	-0.298842	1.0507e-05	0.000894877	chr5
ENSMUSG00000026043	ENSMUST00000129611; ENSMUST00000087883; ENSMUST00000189818; ENSMUST00000123204; ENSMUST00000190943; ENSMUST00000185687; ENSMUST00000186021	Col3a1	protein_coding	protein_coding	collagen, type III, alpha 1 [Source:MGI Symbol;Acc:MGI:88453]	0.4838	1808	GO:0001701; GO:0030324; GO:0071230; GO:0010467; GO:0035264; GO:0007179; GO:0007507; GO:0001894; GO:0051216; GO:0043588; GO:0048856; GO:0001764; GO:0042060; GO:0030198; GO:0035904; GO:0007160; GO:0030199; GO:0048144; GO:0048251; GO:0001568; GO:0002062; GO:0048565; GO:0021987; GO:0018149; GO:0034097; GO:0007229; GO:0035025; GO:0009314; GO:1990776; GO:0021819; GO:0097435; GO:0071711; GO:0050777; GO:…	GO:0005515; GO:0005201; GO:0046872; GO:0002020; GO:0005178; GO:0046332; GO:0030020; GO:0048407	GO:0005615; GO:0110165; GO:0005576; GO:0005581; GO:0031012; GO:0062023; GO:0005586	COL3A1	12825	TRUE	-0.58152	1.05229e-05	0.000894877	chr1
ENSMUSG00000025329	ENSMUST00000026378	Padi1	protein_coding	protein_coding	peptidyl arginine deiminase, type I [Source:MGI Symbol;Acc:MGI:1338893]	0.582	3754		GO:0005509; GO:0004668; GO:0046872; GO:0016787	GO:0005737; GO:0005829; GO:0005654; GO:0005634	PADI1	18599	TRUE	3.33178	1.07303e-05	0.000907236	chr4
ENSMUSG00000049001	ENSMUST00000054351; ENSMUST00000169795	Ndnf	protein_coding	protein_coding	neuron-derived neurotrophic factor [Source:MGI Symbol;Acc:MGI:1915419]	0.4398	5314	GO:0071456; GO:0043524; GO:0010976; GO:0001525; GO:0007399; GO:0001764; GO:0030198; GO:0010811; GO:0044344; GO:2000352; GO:0007263; GO:0002931; GO:0019800; GO:0061042; GO:0021828	GO:0008201; GO:0005539	GO:0005615; GO:0005576; GO:0031012	NDNF	68169	TRUE	-0.906165	1.08414e-05	0.000911365	chr6
ENSMUSG00000039994	ENSMUST00000055539; ENSMUST00000145710; ENSMUST00000105244; ENSMUST00000105243; ENSMUST00000125289; ENSMUST00000105242; ENSMUST00000105245; ENSMUST00000135538; ENSMUST00000135376; ENSMUST00000146945; ENSMUST00000142149; ENSMUST00000142484; ENSMUST00000105240; ENSMUST00000136854; ENSMUST00000129147	Timeless	protein_coding	protein_coding	timeless circadian clock 1 [Source:MGI Symbol;Acc:MGI:1321393]	0.544	2038	GO:0030324; GO:0000122; GO:0006281; GO:0006974; GO:0007049; GO:0051301; GO:0048511; GO:2000781; GO:0045892; GO:0007623; GO:0001822; GO:0072711; GO:0001658; GO:1905168; GO:0042752; GO:0042753; GO:0048754; GO:0044770; GO:0072719; GO:0002009; GO:1904976; GO:0048478; GO:0000076; GO:0043111	GO:0005515; GO:0003677; GO:0042802	GO:0005634; GO:0000785; GO:0005654; GO:0005694; GO:0035861; GO:0031298	TIMELESS	21853	TRUE	0.467331	1.09176e-05	0.000912522	chr10
ENSMUSG00000041920	ENSMUST00000070152; ENSMUST00000070872; ENSMUST00000032206; ENSMUST00000168740; ENSMUST00000129901	Slc16a6	protein_coding	protein_coding	solute carrier family 16 (monocarboxylic acid transporters), member 6 [Source:MGI Symbol;Acc:MGI:2144585]	0.5121	1584	GO:0055085; GO:0015718	GO:0022857; GO:0015293; GO:0008028	GO:0016020; GO:0016021; GO:0005886; GO:0005887	SLC16A6	104681	TRUE	-0.412357	1.15087e-05	0.000952459	chr11
ENSMUSG00000035469	ENSMUST00000173547; ENSMUST00000043227; ENSMUST00000174009; ENSMUST00000022551; ENSMUST00000140136; ENSMUST00000095778; ENSMUST00000142326; ENSMUST00000172810; ENSMUST00000153225; ENSMUST00000174830; ENSMUST00000147280	Rcbtb1	protein_coding	protein_coding	regulator of chromosome condensation (RCC1) and BTB (POZ) domain containing protein 1 [Source:MGI Symbol;Acc:MGI:1918580]	0.4864	1493		GO:0005515	GO:0005737	RCBTB1	71330	TRUE	-0.218594	1.15256e-05	0.000952459	chr14
ENSMUSG00000069372	ENSMUST00000091892; ENSMUST00000209782; ENSMUST00000209786	Ctxn3	protein_coding	protein_coding	cortexin 3 [Source:MGI Symbol;Acc:MGI:3642816]	0.4595	1106	GO:0008150	GO:0003674	GO:0005575; GO:0016020; GO:0016021	CTXN3	629147	TRUE	-2.12493	1.1763e-05	0.000966091	chr18
ENSMUSG00000034486	ENSMUST00000036954; ENSMUST00000187633	Gbx2	protein_coding	protein_coding	gastrulation brain homeobox 2 [Source:MGI Symbol;Acc:MGI:95668]	0.5436	1678	GO:0006355; GO:0045944; GO:0006357; GO:0042472; GO:0035239; GO:0021549; GO:0048483; GO:0007411; GO:0001755; GO:0021884; GO:0021930; GO:0001569; GO:0030917; GO:0030902; GO:0021568; GO:0021555; GO:0021794; GO:0051960	GO:0003677; GO:0000981; GO:0000977; GO:1990837; GO:0061629; GO:0001228; GO:0000979	GO:0005634	GBX2	14472	TRUE	0.535321	1.18294e-05	0.000966091	chr1
ENSMUSG00000026833	ENSMUST00000152415; ENSMUST00000113920; ENSMUST00000100244; ENSMUST00000102879; ENSMUST00000028177	Olfm1	protein_coding	protein_coding	olfactomedin 1 [Source:MGI Symbol;Acc:MGI:1860437]	0.5729	2026	GO:0007399; GO:0007165; GO:0043065; GO:0010628; GO:0060317; GO:0003190; GO:0010629; GO:0010718; GO:0023041; GO:0030516	GO:0005515	GO:0045202; GO:0070161; GO:0005576; GO:0005615; GO:0005783; GO:0042995; GO:0043204; GO:0030424; GO:0098978; GO:0043025; GO:0097060; GO:0032281; GO:0099243; GO:0044295	OLFM1	56177	TRUE	0.262848	1.18887e-05	0.000966091	chr2
ENSMUSG00000025371	ENSMUST00000132197; ENSMUST00000026434; ENSMUST00000124199; ENSMUST00000148232; ENSMUST00000139814; ENSMUST00000137055	Chmp6	protein_coding	protein_coding	charged multivesicular body protein 6 [Source:MGI Symbol;Acc:MGI:3583942]	0.5847	741	GO:0007034; GO:0036258; GO:0051469; GO:0061763; GO:0015031; GO:0060548; GO:0006914; GO:0090148; GO:0001778; GO:0006997; GO:0007080; GO:0007175; GO:0031468; GO:0039702; GO:0042176; GO:0043162; GO:0046761; GO:0061952; GO:0071985; GO:0097352; GO:1901673; GO:1902774; GO:0032511; GO:0006900	GO:0044877; GO:0047485	GO:0016020; GO:0005886; GO:0010008; GO:0012505; GO:0005768; GO:0031902; GO:0005643; GO:0030496; GO:0005765; GO:0000421; GO:0000776; GO:0000815; GO:0005828; GO:0032585; GO:1904930; GO:0005771	CHMP6	208092	TRUE	0.222563	1.2487e-05	0.0010091	chr11
ENSMUSG00000032554	ENSMUST00000112645; ENSMUST00000035158; ENSMUST00000190051; ENSMUST00000168142; ENSMUST00000170904; ENSMUST00000164377; ENSMUST00000112503; ENSMUST00000165296; ENSMUST00000126359	Trf	protein_coding	protein_coding	transferrin [Source:MGI Symbol;Acc:MGI:98821]	0.5225	1076	GO:0060395; GO:0009617; GO:0031643; GO:0006811; GO:0055072; GO:0006879; GO:0006826; GO:0019731; GO:0042327; GO:0070371; GO:0048260; GO:0034756; GO:0071281; GO:0045893; GO:0070447; GO:0030316; GO:0045780; GO:0007015; GO:2000147	GO:0005515; GO:0046872; GO:0008199; GO:0008198; GO:0034986; GO:1990459	GO:0005576; GO:0005886; GO:0005615; GO:0048471; GO:0009986; GO:0016324; GO:0005768; GO:0031410; GO:0055037; GO:0005769; GO:0005770; GO:0030139; GO:0031982; GO:0005604; GO:0009925; GO:0005905; GO:0051286; GO:0031232; GO:1990712; GO:0016020; GO:0045178; GO:0030120; GO:0097433	TF	22041	TRUE	-0.274766	1.35407e-05	0.00108824	chr9
ENSMUSG00000035208	ENSMUST00000215239; ENSMUST00000108152; ENSMUST00000038141; ENSMUST00000092838; ENSMUST00000130822; ENSMUST00000131883	Slfn8	protein_coding	protein_coding	schlafen 8 [Source:MGI Symbol;Acc:MGI:2672859]	0.4381	2822	GO:0090502; GO:0090305; GO:0002376; GO:0051607; GO:0016075; GO:0016078	GO:0046872; GO:0016787; GO:0000166; GO:0005524; GO:0004518; GO:0008270; GO:0004519; GO:0016887; GO:0000049; GO:0004521	GO:0005634; GO:0005829; GO:0005737; GO:0005654; GO:0090734	SLFN11,SLFN13	276950	TRUE	-1.02841	1.43203e-05	0.00114461	chr11
ENSMUSG00000041730	ENSMUST00000187377; ENSMUST00000189022; ENSMUST00000186452; ENSMUST00000068938; ENSMUST00000228878	Prrxl1	protein_coding	protein_coding	paired related homeobox protein-like 1 [Source:MGI Symbol;Acc:MGI:2148204]	0.5261	1864	GO:0006355; GO:0030182; GO:0006357; GO:0001764; GO:0007399; GO:0016048; GO:0007409; GO:0007411; GO:0021516; GO:0050954; GO:0021559; GO:0009593	GO:0003677; GO:0000981; GO:0000977; GO:0003700; GO:1990837	GO:0005634		107751	TRUE	1.3398	1.49548e-05	0.00118883	chr14
ENSMUSG00000050447	ENSMUST00000112712; ENSMUST00000128451; ENSMUST00000053208; ENSMUST00000169232; ENSMUST00000126337	Lypd6	protein_coding	protein_coding	LY6/PLAUR domain containing 6 [Source:MGI Symbol;Acc:MGI:2443848]	0.4846	2306	GO:2000272; GO:0090263	GO:0030550; GO:0030548	GO:0005575; GO:0005737; GO:0016020; GO:0005886; GO:0031225; GO:0045202; GO:0045121; GO:0005576; GO:0043005	LYPD6	320343	TRUE	-1.08579	1.54649e-05	0.00122273	chr2
ENSMUSG00000038534	ENSMUST00000090020; ENSMUST00000154084; ENSMUST00000168565; ENSMUST00000142399; ENSMUST00000142406; ENSMUST00000143360	Osbpl7	protein_coding	protein_coding	oxysterol binding protein-like 7 [Source:MGI Symbol;Acc:MGI:1918490]	0.5662	1970	GO:0006869; GO:0071397; GO:1901800	GO:0008289; GO:0015485	GO:0005829; GO:0005654; GO:0005886; GO:0005776; GO:0097038	OSBPL7	71240	TRUE	-0.267972	1.56551e-05	0.00123111	chr11
ENSMUSG00000062991	ENSMUST00000207470; ENSMUST00000207417; ENSMUST00000209107; ENSMUST00000238791; ENSMUST00000208617; ENSMUST00000208205; ENSMUST00000073884; ENSMUST00000208819; ENSMUST00000208488; ENSMUST00000238842; ENSMUST00000239067; ENSMUST00000238816; ENSMUST00000239151; ENSMUST00000208335; ENSMUST00000208598; ENSMUST00000208497; ENSMUST00000207678; ENSMUST00000238958; ENSMUST00000238909; ENSMUST00000208355;…	Nrg1	protein_coding	protein_coding	neuregulin 1 [Source:MGI Symbol;Acc:MGI:96083]	0.4966	1924	GO:0010628; GO:0008284; GO:0030307; GO:0010976; GO:0043491; GO:0000902; GO:0051897; GO:0007507; GO:0003161; GO:0008283; GO:0007626; GO:0048709; GO:0007399; GO:0006354; GO:0035556; GO:0030154; GO:0046579; GO:0045892; GO:0000165; GO:0001764; GO:0003222; GO:0007169; GO:0007171; GO:0007416; GO:0007422; GO:0007517; GO:0007613; GO:0010001; GO:0010625; GO:0010667; GO:0014037; GO:0021781; GO:0021842; GO:…	GO:0005102; GO:0005515; GO:0008083; GO:0048018; GO:0003712; GO:0005176; GO:0005178; GO:0030296; GO:0030971; GO:0043125; GO:0045499	GO:0045202; GO:0005737; GO:0030424; GO:0005654; GO:0016020; GO:0016021; GO:0005886; GO:0005615; GO:0110165; GO:0005576; GO:0016324; GO:0005887; GO:0098978; GO:0098982; GO:0031594; GO:0099059; GO:0099061	NRG1	211323	TRUE	-0.348874	1.61226e-05	0.0012611	chr8
ENSMUSG00000062380	ENSMUST00000071134; ENSMUST00000212743	Tubb3	protein_coding	protein_coding	tubulin, beta 3 class III [Source:MGI Symbol;Acc:MGI:107813]	0.5812	1322	GO:0007017; GO:0030182; GO:0000226; GO:0007411; GO:0000278; GO:0038007; GO:1990791	GO:0005525; GO:0005515; GO:0000166; GO:0005200; GO:0003924; GO:0042277; GO:1990890	GO:0005874; GO:0005737; GO:0030424; GO:0071944; GO:0015630; GO:0045171; GO:0005856; GO:0030426; GO:0042995; GO:0030027; GO:0030175; GO:0043025; GO:0072686; GO:0030425	TUBB3	22152	TRUE	0.245813	1.63275e-05	0.00127033	chr8
ENSMUSG00000044017	ENSMUST00000056617; ENSMUST00000155590; ENSMUST00000156437	Adgrd1	protein_coding	protein_coding	adhesion G protein-coupled receptor D1 [Source:MGI Symbol;Acc:MGI:3041203]	0.5322	4323	GO:0007186; GO:0007166; GO:0007189; GO:0022008	GO:0004930; GO:0004888	GO:0016021; GO:0005654; GO:0016020; GO:0005886; GO:0005887	ADGRD1	243277	TRUE	0.809417	1.64164e-05	0.00127049	chr5
ENSMUSG00000033769	ENSMUST00000160197; ENSMUST00000051531; ENSMUST00000046334; ENSMUST00000162821; ENSMUST00000204011; ENSMUST00000160783; ENSMUST00000161443; ENSMUST00000162786	Exoc6b	protein_coding	protein_coding	exocyst complex component 6B [Source:MGI Symbol;Acc:MGI:1923164]	0.4456	2928	GO:0006886; GO:0006887; GO:0090522; GO:0000281; GO:0006893; GO:0006904; GO:0090148	GO:0003674	GO:0000145	EXOC6B	75914	TRUE	-0.181619	1.72906e-05	0.00132486	chr6
ENSMUSG00000033174	ENSMUST00000113585; ENSMUST00000151699; ENSMUST00000113582; ENSMUST00000203608; ENSMUST00000113581; ENSMUST00000150180; ENSMUST00000163271; ENSMUST00000089449; ENSMUST00000203824; ENSMUST00000205045	Mgll	protein_coding	protein_coding	monoglyceride lipase [Source:MGI Symbol;Acc:MGI:1346042]	0.5638	1788	GO:0009966; GO:0006629; GO:0016042; GO:0006631; GO:0006633; GO:0019433; GO:0051930; GO:0045907; GO:0019369; GO:0060292; GO:0052651; GO:0030516; GO:0046464; GO:0050727; GO:2000124	GO:0016787; GO:0052689; GO:0042803; GO:0047372; GO:0016298	GO:0045202; GO:0030424; GO:0005654; GO:0005737; GO:0016020; GO:0005829; GO:0019898; GO:0043196	MGLL	23945	TRUE	0.321112	1.73001e-05	0.00132486	chr6
ENSMUSG00000018648	ENSMUST00000100705; ENSMUST00000018792; ENSMUST00000164891; ENSMUST00000108101; ENSMUST00000138208	Dusp14	protein_coding	protein_coding	dual specificity phosphatase 14 [Source:MGI Symbol;Acc:MGI:1927168]	0.5325	1253	GO:0006470; GO:0016311	GO:0016791; GO:0008138; GO:0016787; GO:0004721; GO:0004725; GO:0004722; GO:0017018; GO:0017017	GO:0005634; GO:0005737	DUSP14	56405	TRUE	0.407537	1.81334e-05	0.00138145	chr11
ENSMUSG00000041836	ENSMUST00000211140; ENSMUST00000209268; ENSMUST00000073961; ENSMUST00000209256; ENSMUST00000211788; ENSMUST00000210833; ENSMUST00000209979; ENSMUST00000211092	Ptpre	protein_coding	protein_coding	protein tyrosine phosphatase, receptor type, E [Source:MGI Symbol;Acc:MGI:97813]	0.5115	3621	GO:0006470; GO:0016311; GO:0046627; GO:0033003; GO:0007185	GO:0016791; GO:0004725; GO:0016787; GO:0004721; GO:0042802	GO:0005634; GO:0005737; GO:0016020; GO:0016021; GO:0005886	PTPRE	19267	TRUE	-0.542003	1.85926e-05	0.00140909	chr7
ENSMUSG00000027523	ENSMUST00000109095; ENSMUST00000180362; ENSMUST00000109096; ENSMUST00000130940; ENSMUST00000130761; ENSMUST00000087877; ENSMUST00000080493; ENSMUST00000154658; ENSMUST00000109088; ENSMUST00000185956; ENSMUST00000186907; ENSMUST00000087876; ENSMUST00000124935; ENSMUST00000156623; ENSMUST00000149016; ENSMUST00000238525; ENSMUST00000133356; ENSMUST00000087871; ENSMUST00000148640; ENSMUST00000109085;…	Gnas	protein_coding	protein_coding	GNAS (guanine nucleotide binding protein, alpha stimulating) complex locus [Source:MGI Symbol;Acc:MGI:95777]	0.5621	1950	GO:0071107; GO:0008284; GO:0009791; GO:0035264; GO:0006357; GO:0045669; GO:0060348; GO:0001501; GO:0001894; GO:0051216; GO:0048701; GO:0006306; GO:0043588; GO:0071514; GO:0007186; GO:0001934; GO:0009410; GO:0050890; GO:0055074; GO:0043547; GO:0120162; GO:0035116; GO:0010765; GO:0007188; GO:0035814; GO:0070527; GO:0006112; GO:0031279; GO:0045776; GO:0045672; GO:0007189; GO:0060789; GO:0043950; GO:…	GO:0005515; GO:0003924; GO:0005525; GO:0001664; GO:0019904; GO:0031683; GO:0031698; GO:0035255; GO:0043014; GO:0001965; GO:0005159; GO:0031681; GO:0010856; GO:0031852; GO:0051430; GO:0047391; GO:0031748; GO:0046872; GO:0000166; GO:0019001	GO:0005634; GO:0005829; GO:0005737; GO:0005886; GO:0005794; GO:0048471; GO:0031410; GO:0005576; GO:0016020; GO:0042383; GO:0043025; GO:0005768; GO:0030425; GO:0055037; GO:0001726; GO:0005834; GO:0045121; GO:0032588; GO:0031224; GO:0030133; GO:0030142; GO:0016324; GO:0042995; GO:0016021	GNAS	14683	TRUE	0.14105	1.90571e-05	0.00143098	chr2
ENSMUSG00000055717	ENSMUST00000069443; ENSMUST00000160805; ENSMUST00000162818; ENSMUST00000159456	Slain1	protein_coding	protein_coding	SLAIN motif family, member 1 [Source:MGI Symbol;Acc:MGI:2145578]	0.5159	1914	GO:0031122; GO:0007020; GO:0031116	GO:0003674	GO:0005737; GO:0005856; GO:0035371	SLAIN1	105439	TRUE	-0.234909	1.91375e-05	0.00143098	chr14
ENSMUSG00000031253	ENSMUST00000033606; ENSMUST00000113304	Srpx2	protein_coding	protein_coding	sushi-repeat-containing protein, X-linked 2 [Source:MGI Symbol;Acc:MGI:1916042]	0.5052	2569	GO:0098609; GO:0007155; GO:0001525; GO:0048870; GO:0051965; GO:0042325; GO:0090050; GO:0071625	GO:0005102; GO:0042802; GO:0005201; GO:0036458	GO:0005737; GO:0005615; GO:0009986; GO:0045202; GO:0005576; GO:0097060; GO:0060076; GO:0062023	SRPX2	68792	TRUE	0.638964	1.91749e-05	0.00143098	chrX
ENSMUSG00000059974	ENSMUST00000075069; ENSMUST00000115237; ENSMUST00000155308; ENSMUST00000140118; ENSMUST00000115236; ENSMUST00000126044; ENSMUST00000148606; ENSMUST00000124119; ENSMUST00000152513; ENSMUST00000146651; ENSMUST00000151977	Ntm	protein_coding	protein_coding	neurotrimin [Source:MGI Symbol;Acc:MGI:2446259]	0.4837	1386	GO:0010977; GO:0007155		GO:0030424; GO:0016020; GO:0005615; GO:0005886; GO:0031225; GO:0048471; GO:0009986; GO:0060076	NTM	235106	TRUE	0.217078	1.94679e-05	0.00144547	chr9
ENSMUSG00000022144	ENSMUST00000022744	Gdnf	protein_coding	protein_coding	glial cell line derived neurotrophic factor [Source:MGI Symbol;Acc:MGI:107430]	0.5079	3674	GO:0045944; GO:0009611; GO:0008284; GO:0010468; GO:0043524; GO:0071549; GO:0007179; GO:0008283; GO:0030182; GO:0001755; GO:0048484; GO:0048731; GO:0007169; GO:0007399; GO:0007422; GO:0050731; GO:2001240; GO:0031175; GO:0048255; GO:0001656; GO:0090190; GO:0001658; GO:0045597; GO:0001657; GO:0001759; GO:0003337; GO:0060676; GO:0001941; GO:1901166; GO:0060688; GO:0072107; GO:0030432; GO:0032770; GO:…	GO:0008083; GO:0042803; GO:0048018; GO:0030971; GO:0030116; GO:0005160	GO:0005615; GO:0005794; GO:0005576; GO:0043235	GDNF	14573	TRUE	1.33369	2.03606e-05	0.00149261	chr15
ENSMUSG00000042046	ENSMUST00000045110; ENSMUST00000188389; ENSMUST00000188973; ENSMUST00000187092; ENSMUST00000188006; ENSMUST00000191494	Dstyk	protein_coding	protein_coding	dual serine/threonine and tyrosine protein kinase [Source:MGI Symbol;Acc:MGI:1925064]	0.4718	2328	GO:0006468; GO:0043066; GO:0016310; GO:0018108; GO:0070374; GO:0044344; GO:0045743; GO:0033674	GO:0005524; GO:0004672; GO:0016740; GO:0000166; GO:0016301; GO:0004674; GO:0004713; GO:0106310; GO:0004712	GO:0005737; GO:0016020; GO:0005886; GO:0070161; GO:0016323; GO:0016324	DSTYK	213452	TRUE	-0.147903	2.03938e-05	0.00149261	chr1
ENSMUSG00000015090	ENSMUST00000114259; ENSMUST00000015234; ENSMUST00000114251; ENSMUST00000144016; ENSMUST00000137417	Ptgds	protein_coding	protein_coding	prostaglandin D2 synthase (brain) [Source:MGI Symbol;Acc:MGI:99261]	0.5629	895	GO:0010467; GO:0006629; GO:0043303; GO:0006631; GO:0006633; GO:0006693; GO:2000255; GO:0001516; GO:0045187; GO:0051384	GO:0016853; GO:0036094; GO:0005501; GO:0005504; GO:0004667	GO:0005634; GO:0005737; GO:0016020; GO:0005794; GO:0005615; GO:0110165; GO:0005783; GO:0005576; GO:0048471; GO:0031965; GO:0005791; GO:0005654	PTGDS	19215	TRUE	-0.399378	2.04089e-05	0.00149261	chr2
ENSMUSG00000039824	ENSMUST00000026428; ENSMUST00000218250	Myl6b	protein_coding	protein_coding	myosin, light polypeptide 6B [Source:MGI Symbol;Acc:MGI:1917789]	0.5671	1134	GO:0006936; GO:0007519; GO:0030049	GO:0005509; GO:0008307; GO:0003774	GO:0016459; GO:0016460; GO:0016461	MYL6B	216459	TRUE	0.234285	2.06567e-05	0.00149709	chr10
ENSMUSG00000030795	ENSMUST00000106251; ENSMUST00000077609; ENSMUST00000137464; ENSMUST00000174196; ENSMUST00000128851; ENSMUST00000121616; ENSMUST00000123151; ENSMUST00000154843; ENSMUST00000155941; ENSMUST00000205261; ENSMUST00000136289; ENSMUST00000174632; ENSMUST00000205351; ENSMUST00000141997; ENSMUST00000172755; ENSMUST00000079045	Fus	protein_coding	protein_coding	fused in sarcoma [Source:MGI Symbol;Acc:MGI:1353633]	0.4698	1771	GO:0010467; GO:0006357; GO:0006355; GO:0006354; GO:0045893; GO:0071277; GO:0008380; GO:0051260; GO:0048255; GO:1905168; GO:0043484; GO:1990000	GO:0003723; GO:0003730; GO:0003682; GO:0003677; GO:0046872; GO:0003676; GO:0005515; GO:0042802; GO:0003712; GO:0003713; GO:0046966; GO:0035255; GO:0030331; GO:0046965; GO:0140693; GO:0031489	GO:0005634; GO:0005737; GO:0005654; GO:0048471; GO:0005844; GO:0043025; GO:0030425; GO:0043204; GO:0043197; GO:0043232; GO:0044327; GO:0016020; GO:0016021	FUS	233908	TRUE	0.311671	2.06749e-05	0.00149709	chr7
ENSMUSG00000030374	ENSMUST00000019220; ENSMUST00000108495; ENSMUST00000184280; ENSMUST00000137885; ENSMUST00000184708; ENSMUST00000138070; ENSMUST00000123247; ENSMUST00000127835; ENSMUST00000185011; ENSMUST00000134350; ENSMUST00000123510; ENSMUST00000131721; ENSMUST00000184694; ENSMUST00000183680	Strn4	protein_coding	protein_coding	striatin, calmodulin binding protein 4 [Source:MGI Symbol;Acc:MGI:2142346]	0.5619	1332	GO:0008150	GO:0005515; GO:0003674; GO:0044877; GO:0005516; GO:0019904; GO:0051721; GO:0070016	GO:0005737; GO:0016020; GO:0032991; GO:0045202; GO:0042995; GO:0030425; GO:0043197; GO:0090443	STRN4	97387	TRUE	0.250449	2.12035e-05	0.0015278	chr7
ENSMUSG00000035451	ENSMUST00000044380; ENSMUST00000218398	Foxa1	protein_coding	protein_coding	forkhead box A1 [Source:MGI Symbol;Acc:MGI:1347472]	0.6056	1802	GO:0006355; GO:0030324; GO:0045944; GO:0010468; GO:0000122; GO:0051726; GO:0006357; GO:0030182; GO:0006325; GO:0030154; GO:0042593; GO:0006338; GO:0043065; GO:0051091; GO:0042445; GO:0032355; GO:0007224; GO:0048665; GO:0071542; GO:0035239; GO:0045880; GO:0010719; GO:0009653; GO:0007219; GO:0060441; GO:0060425; GO:0060740; GO:0060743; GO:1901300; GO:0021904; GO:0045931; GO:0060487; GO:0048646; GO:…	GO:0003700; GO:0043565; GO:0008134; GO:0019904; GO:0000978; GO:0003682; GO:0000976; GO:0003677; GO:0000981; GO:0001228; GO:1990837; GO:0003690; GO:0061629	GO:0005634; GO:0005654; GO:0001650; GO:0005902	FOXA1	15375	TRUE	-3.03957	2.18868e-05	0.00156325	chr12
ENSMUSG00000031230	ENSMUST00000033581	Fgf16	protein_coding	protein_coding	fibroblast growth factor 16 [Source:MGI Symbol;Acc:MGI:1931627]	0.5185	1645	GO:0030154; GO:0008284; GO:0008543; GO:2000546; GO:0030334; GO:0009887; GO:0010628; GO:0001934; GO:0070349	GO:0008083; GO:0005104	GO:0005576; GO:0005615; GO:0005737	FGF16	80903	TRUE	1.64534	2.19093e-05	0.00156325	chrX
ENSMUSG00000030598	ENSMUST00000032818; ENSMUST00000108278; ENSMUST00000139172; ENSMUST00000108279; ENSMUST00000167118	Fbxo17	protein_coding	protein_coding	F-box protein 17 [Source:MGI Symbol;Acc:MGI:1354707]	0.5598	1405	GO:0016567; GO:0031146; GO:0030433; GO:0006516	GO:0005515; GO:0061630	GO:0005737; GO:0019005	FBXO17	50760	TRUE	0.928016	2.28077e-05	0.00161946	chr7
ENSMUSG00000029168	ENSMUST00000114729; ENSMUST00000088081; ENSMUST00000101442; ENSMUST00000127365; ENSMUST00000198503; ENSMUST00000136657; ENSMUST00000138625	Dpysl5	protein_coding	protein_coding	dihydropyrimidinase-like 5 [Source:MGI Symbol;Acc:MGI:1929772]	0.55	2108	GO:0007399; GO:0007411; GO:0050774; GO:0030182	GO:0016787; GO:0005515; GO:0008017; GO:0016810	GO:0005737; GO:0032991; GO:0043025; GO:0030425	DPYSL5	65254	TRUE	0.302208	2.31503e-05	0.00162873	chr5
ENSMUSG00000028101	ENSMUST00000107076; ENSMUST00000162934; ENSMUST00000162778; ENSMUST00000064900; ENSMUST00000107077; ENSMUST00000176288; ENSMUST00000176302; ENSMUST00000162707; ENSMUST00000161296; ENSMUST00000162156	Pias3	protein_coding	protein_coding	protein inhibitor of activated STAT 3 [Source:MGI Symbol;Acc:MGI:1913126]	0.564	1495	GO:0010629; GO:0010628; GO:0000122; GO:0006357; GO:0006354; GO:0045671; GO:0045892; GO:0060255; GO:0016925; GO:0045838; GO:0071847; GO:0033234; GO:0033235; GO:0009725	GO:0008270; GO:0005515; GO:0016740; GO:0046872; GO:0019789; GO:0003712; GO:0008022; GO:0019899; GO:0047485; GO:0015459; GO:0061665	GO:0005634; GO:0045202; GO:0005737; GO:0016607; GO:0030425	PIAS3	229615	TRUE	0.213254	2.3161e-05	0.00162873	chr3
ENSMUSG00000000263	ENSMUST00000108853; ENSMUST00000075603; ENSMUST00000102716	Glra1	protein_coding	protein_coding	glycine receptor, alpha 1 subunit [Source:MGI Symbol;Acc:MGI:95747]	0.5217	2075	GO:0006811; GO:0034220; GO:1902476; GO:0006821; GO:0071230; GO:0071361; GO:0060079; GO:0060013; GO:0007165; GO:0007268; GO:0042391; GO:0050877; GO:0007218; GO:0006820; GO:0006936; GO:0007628; GO:0019228; GO:0050884; GO:0071294; GO:0007601; GO:0002087; GO:0050905; GO:0060080; GO:0051970; GO:0043576; GO:0007340; GO:2000344; GO:0001964; GO:0043200; GO:0060012; GO:0097305	GO:0005230; GO:0004888; GO:0005216; GO:0005254; GO:0016594; GO:0022824; GO:0044877; GO:0046872; GO:0008270; GO:0042802; GO:0005231; GO:0030594; GO:1904315; GO:0016934; GO:0030977; GO:0016933	GO:0016021; GO:0016020; GO:0005886; GO:0005887; GO:0045202; GO:0045211; GO:0070161; GO:0042995; GO:0034707; GO:0009897; GO:0043231; GO:0030425; GO:0043204; GO:0043005; GO:0099060; GO:0043025; GO:0099056; GO:0060077; GO:0044305; GO:0098690	GLRA1	14654	TRUE	-1.11441	2.33774e-05	0.00163044	chr11
ENSMUSG00000026458	ENSMUST00000168515; ENSMUST00000186730; ENSMUST00000186964; ENSMUST00000189862; ENSMUST00000189361; ENSMUST00000186553	Ppfia4	protein_coding	protein_coding	protein tyrosine phosphatase, receptor type, f polypeptide (PTPRF), interacting protein (liprin), alpha 4 [Source:MGI Symbol;Acc:MGI:1915757]	0.5689	3856	GO:0050808	GO:0005515	GO:0005737; GO:0045202; GO:0048786	PPFIA4	68507	TRUE	0.197263	2.34995e-05	0.00163044	chr1
ENSMUSG00000038668	ENSMUST00000107570; ENSMUST00000107571; ENSMUST00000055018; ENSMUST00000107575; ENSMUST00000107574; ENSMUST00000155170; ENSMUST00000147354; ENSMUST00000145361	Lpar1	protein_coding	protein_coding	lysophosphatidic acid receptor 1 [Source:MGI Symbol;Acc:MGI:108429]	0.4897	2308	GO:0007186; GO:0010977; GO:0043951; GO:0007165; GO:0008360; GO:0043410; GO:0007189; GO:0007193; GO:0010942; GO:0043065; GO:0060999; GO:0051496; GO:0022008; GO:0051482; GO:0035025; GO:0019222; GO:0007202; GO:0060326; GO:0032060; GO:0071673; GO:1904566; GO:0007420; GO:0014003; GO:0021549; GO:0021554; GO:0022038; GO:0042552; GO:0043123; GO:0071453	GO:0004930; GO:0005515; GO:0030165; GO:0070915; GO:0005543; GO:0035727; GO:0001965	GO:0016021; GO:0005737; GO:0016020; GO:0005886; GO:0009986; GO:0043005; GO:0043025; GO:0043198; GO:0005768; GO:0005887; GO:0030139; GO:0043197	LPAR1	14745	TRUE	-0.239824	2.35197e-05	0.00163044	chr4
ENSMUSG00000029860	ENSMUST00000203329; ENSMUST00000203846; ENSMUST00000203652; ENSMUST00000070635; ENSMUST00000203290; ENSMUST00000203401; ENSMUST00000203626; ENSMUST00000164375; ENSMUST00000203849; ENSMUST00000204270; ENSMUST00000204480	Zyx	protein_coding	protein_coding	zyxin [Source:MGI Symbol;Acc:MGI:103072]	0.615	1479	GO:0007179; GO:0071346; GO:0007155; GO:0007229; GO:0007165; GO:0043149; GO:0007160; GO:0050727	GO:0005515; GO:0046872	GO:0005634; GO:0005829; GO:0005737; GO:0005886; GO:0070161; GO:0005925; GO:0005856; GO:0015629; GO:0045335; GO:0005912; GO:0001725	ZYX	22793	TRUE	0.289504	2.39357e-05	0.00165145	chr6
ENSMUSG00000022469	ENSMUST00000126854; ENSMUST00000129223; ENSMUST00000128775; ENSMUST00000177352; ENSMUST00000134885; ENSMUST00000175894; ENSMUST00000125002; ENSMUST00000123397; ENSMUST00000155810; ENSMUST00000146214; ENSMUST00000134371; ENSMUST00000153241; ENSMUST00000149419; ENSMUST00000153464; ENSMUST00000146620; ENSMUST00000142196; ENSMUST00000135080	Rapgef3	protein_coding	protein_coding	Rap guanine nucleotide exchange factor (GEF) 3 [Source:MGI Symbol;Acc:MGI:2441741]	0.587	1699	GO:0035556; GO:0007264; GO:0045944; GO:0045766; GO:0071320; GO:0001934; GO:0007265; GO:0043547; GO:0001525; GO:0010667; GO:0033138; GO:2000249; GO:0032486; GO:0061028; GO:0051496; GO:0045793; GO:1901985; GO:0014911; GO:0046827; GO:2000251; GO:0008306; GO:0032966; GO:1904427; GO:0060143; GO:1904426; GO:0034242; GO:1904453; GO:0050790	GO:0005085; GO:0000166; GO:0005515; GO:0030552; GO:0044325; GO:0019904	GO:0005737; GO:0016020; GO:0005886; GO:0071944; GO:0048471; GO:0030027; GO:0030175; GO:0045177; GO:0030426; GO:0043025; GO:0043679; GO:0005902; GO:0009925; GO:0030864; GO:0031526; GO:0031090; GO:0097470; GO:1990794; GO:1990795; GO:1990796	RAPGEF3	223864	TRUE	0.201407	2.40708e-05	0.00165298	chr15
ENSMUSG00000026879	ENSMUST00000201185; ENSMUST00000202990; ENSMUST00000202899; ENSMUST00000142324; ENSMUST00000139867; ENSMUST00000028239; ENSMUST00000124323	Gsn	protein_coding	protein_coding	gelsolin [Source:MGI Symbol;Acc:MGI:95851]	0.5602	1457	GO:0010628; GO:0006915; GO:0071346; GO:0030030; GO:0051016; GO:0051693; GO:0051014; GO:0045010; GO:0031648; GO:0071276; GO:2001269; GO:0060271; GO:0016192; GO:0042989; GO:0007417; GO:0048015; GO:0030041; GO:0046597; GO:0090527; GO:0030155; GO:0097284; GO:0055119; GO:1990000; GO:0006911; GO:0008154; GO:0071801; GO:0014891; GO:0030031; GO:0030036; GO:0030042; GO:0035994; GO:0051127; GO:0086003; GO:…	GO:0005515; GO:0046872; GO:0005509; GO:0003779; GO:0051015; GO:0005546; GO:0036313; GO:0045159	GO:0005634; GO:0005829; GO:0005737; GO:0005886; GO:0005615; GO:0032991; GO:0048471; GO:0005576; GO:0005856; GO:0030027; GO:0005925; GO:0015629; GO:0001726; GO:0045335; GO:0030864; GO:0016528; GO:0030478; GO:0043209; GO:0002102; GO:0042995; GO:0042470	GSN	227753	TRUE	-0.256236	2.47322e-05	0.00169046	chr2
ENSMUSG00000022766	ENSMUST00000023450; ENSMUST00000231884	Serpind1	protein_coding	protein_coding	serine (or cysteine) peptidase inhibitor, clade D, member 1 [Source:MGI Symbol;Acc:MGI:96051]	0.4719	2121	GO:0007596; GO:0010466; GO:0007599; GO:0010951	GO:0004867; GO:0008201; GO:0030414	GO:0005615	SERPIND1	15160	TRUE	-0.620519	2.50193e-05	0.00170213	chr16
ENSMUSG00000070366	ENSMUST00000094018; ENSMUST00000206551; ENSMUST00000206918; ENSMUST00000205630; ENSMUST00000205896	Plpp4	protein_coding	protein_coding	phospholipid phosphatase 4 [Source:MGI Symbol;Acc:MGI:2685936]	0.531	787	GO:0006644; GO:0006629; GO:0046839; GO:0001835; GO:0090279	GO:0016787; GO:0042802; GO:0008195; GO:0000810	GO:0016020; GO:0016021	PLPP4	381925	TRUE	0.55732	2.51638e-05	0.00170403	chr7
ENSMUSG00000039904	ENSMUST00000200812; ENSMUST00000054867	Gpr37	protein_coding	protein_coding	G protein-coupled receptor 37 [Source:MGI Symbol;Acc:MGI:1313297]	0.4873	4004	GO:0007186; GO:0007165; GO:0043410; GO:0042416; GO:0016358; GO:0007193; GO:0031987; GO:0007218; GO:0045964; GO:1903206	GO:0004930; GO:0030165; GO:0042277; GO:0031072; GO:0031625; GO:0030544; GO:0008528; GO:0008188; GO:0042923; GO:0036505	GO:0016021; GO:0045202; GO:0005737; GO:0016020; GO:0005886; GO:0005783; GO:0005789; GO:0009986; GO:0000151; GO:0043235	GPR37	14763	TRUE	-0.229643	2.55731e-05	0.00172377	chr6
ENSMUSG00000035547	ENSMUST00000040971; ENSMUST00000107112; ENSMUST00000134638; ENSMUST00000155056; ENSMUST00000129430	Capn5	protein_coding	protein_coding	calpain 5 [Source:MGI Symbol;Acc:MGI:1100859]	0.5832	1644	GO:0006508	GO:0004198; GO:0016787; GO:0008233; GO:0008234	GO:0045202; GO:0009986; GO:0005737	CAPN5	12337	TRUE	0.244691	2.58833e-05	0.00173668	chr7
ENSMUSG00000039313	ENSMUST00000044491; ENSMUST00000191465	Minar1	protein_coding	protein_coding	membrane integral NOTCH2 associated receptor 1 [Source:MGI Symbol;Acc:MGI:2667167]	0.4792	5036	GO:0016525; GO:0008285; GO:0010977; GO:0031397; GO:0032007; GO:0001525; GO:0030308	GO:0003674	GO:0016020; GO:0016021; GO:0005886	MINAR1	209743	TRUE	-0.682494	2.62788e-05	0.00175516	chr9
ENSMUSG00000091712	ENSMUST00000165810; ENSMUST00000230616	Sec14l5	protein_coding	protein_coding	SEC14-like lipid binding 5 [Source:MGI Symbol;Acc:MGI:3616084]	0.5584	4038	GO:0008150	GO:0003674	GO:0005737	SEC14L5	665119	TRUE	-0.44521	2.66738e-05	0.00176392	chr16
ENSMUSG00000036737	ENSMUST00000040853; ENSMUST00000128880; ENSMUST00000136902; ENSMUST00000143728	Oxsr1	protein_coding	protein_coding	oxidative-stress responsive 1 [Source:MGI Symbol;Acc:MGI:1917378]	0.4768	2092	GO:0006468; GO:0016310; GO:0035556; GO:0009410; GO:0046777; GO:0007165; GO:0006979; GO:0018107; GO:0010820; GO:1990869; GO:0038146; GO:0038116; GO:0007231; GO:0071476; GO:1901017; GO:1901380	GO:0005524; GO:0004672; GO:0004674; GO:0005515; GO:0016740; GO:0046872; GO:0000166; GO:0016301; GO:0042802; GO:0000287; GO:0106310; GO:0019901	GO:0005829; GO:0005737	OXSR1	108737	TRUE	-0.251006	2.66775e-05	0.00176392	chr9
ENSMUSG00000021830	ENSMUST00000139526; ENSMUST00000022377; ENSMUST00000123879; ENSMUST00000156600; ENSMUST00000147853; ENSMUST00000128484; ENSMUST00000227333; ENSMUST00000143609; ENSMUST00000153383; ENSMUST00000226879; ENSMUST00000150648; ENSMUST00000123118	Txndc16	protein_coding	protein_coding	thioredoxin domain containing 16 [Source:MGI Symbol;Acc:MGI:1917811]	0.4526	2286	GO:0008150	GO:0003674	GO:0005783; GO:0005576; GO:0005788	TXNDC16	70561	TRUE	-0.180674	2.67717e-05	0.00176392	chr14
ENSMUSG00000040351	ENSMUST00000043551; ENSMUST00000199043; ENSMUST00000200335; ENSMUST00000198344; ENSMUST00000200052; ENSMUST00000199763	Ankib1	protein_coding	protein_coding	ankyrin repeat and IBR domain containing 1 [Source:MGI Symbol;Acc:MGI:1918047]	0.4381	2159	GO:0000209; GO:0006511; GO:0016567; GO:0032436	GO:0005515; GO:0016740; GO:0046872; GO:0004842; GO:0061630; GO:0031624	GO:0005737; GO:0000151	ANKIB1	70797	TRUE	-0.159355	2.69714e-05	0.0017691	chr5
ENSMUSG00000028717	ENSMUST00000030489; ENSMUST00000136946; ENSMUST00000161601; ENSMUST00000162489	Tal1	protein_coding	protein_coding	T cell acute lymphocytic leukemia 1 [Source:MGI Symbol;Acc:MGI:98480]	0.5828	2873	GO:0045944; GO:0030218; GO:0060218; GO:0000122; GO:0001525; GO:0006366; GO:0007626; GO:0042127; GO:0006357; GO:0045893; GO:0030154; GO:0007171; GO:0030097; GO:0031334; GO:0030099; GO:0048699; GO:0030220; GO:0035855; GO:0051781; GO:0045165; GO:0030219; GO:0043249; GO:0035162; GO:0045648; GO:0060216; GO:0045931; GO:0021953; GO:0021527; GO:0045637; GO:0060018; GO:0060217; GO:0060375; GO:1904672; GO:…	GO:0046983; GO:0005515; GO:0000978; GO:0003682; GO:0000976; GO:0003677; GO:0000981; GO:0003700; GO:0061629; GO:0042826; GO:0070888; GO:0019899; GO:0030297	GO:0005634; GO:0000785; GO:0005654; GO:0032991; GO:0005667	TAL1	21349	TRUE	-1.27355	2.93373e-05	0.00189861	chr4
ENSMUSG00000054134	ENSMUST00000114555; ENSMUST00000066554; ENSMUST00000066981; ENSMUST00000237889; ENSMUST00000235156; ENSMUST00000235827	Umodl1	protein_coding	protein_coding	uromodulin-like 1 [Source:MGI Symbol;Acc:MGI:1929785]	0.5395	4213	GO:0010468; GO:0042981; GO:0060612; GO:0007338; GO:0043086; GO:0052547; GO:1904708; GO:0048609; GO:2000354; GO:2000241; GO:0097211; GO:1990266; GO:0050793	GO:0005515; GO:0005509; GO:0030414; GO:0005201	GO:0005576; GO:0016020; GO:0016021; GO:0005615; GO:0009897; GO:0005886; GO:0009986; GO:0016324; GO:0071944	UMODL1	52020	TRUE	1.53014	2.93948e-05	0.00189861	chr17
ENSMUSG00000052534	ENSMUST00000188912; ENSMUST00000176540; ENSMUST00000176790; ENSMUST00000097471; ENSMUST00000064438; ENSMUST00000072863; ENSMUST00000176482; ENSMUST00000176791	Pbx1	protein_coding	protein_coding	pre B cell leukemia homeobox 1 [Source:MGI Symbol;Acc:MGI:97495]	0.498	2742	GO:0006355; GO:0045944; GO:2000648; GO:0072089; GO:0008283; GO:0048568; GO:0048538; GO:0042127; GO:0006357; GO:0030154; GO:0006694; GO:0007548; GO:0009952; GO:0043433; GO:0007420; GO:0048706; GO:0045665; GO:0009887; GO:0010971; GO:0048536; GO:0048666; GO:0001658; GO:0030278; GO:0001779; GO:0035162; GO:0001655; GO:0000086; GO:0001654; GO:0030326; GO:0030325; GO:0009954	GO:0003677; GO:0003700; GO:0000981; GO:0043565; GO:0005515; GO:0000978; GO:0000976; GO:0000977; GO:0001228; GO:0140297; GO:1990837; GO:0001221; GO:0001222	GO:0005634; GO:0005737; GO:0005654; GO:0090575; GO:0005667	PBX1	18514	TRUE	0.126822	2.94203e-05	0.00189861	chr1
ENSMUSG00000013523	ENSMUST00000154650; ENSMUST00000109152; ENSMUST00000068137; ENSMUST00000013667; ENSMUST00000156657; ENSMUST00000133673; ENSMUST00000152461; ENSMUST00000147577; ENSMUST00000145920	Bcas1	protein_coding	protein_coding	brain enriched myelin associated protein 1 [Source:MGI Symbol;Acc:MGI:1924210]	0.5245	1552	GO:0042552	GO:0042803	GO:0014069; GO:0005829; GO:0005737	BCAS1	76960	TRUE	-0.325868	2.9465e-05	0.00189861	chr2
ENSMUSG00000073680	ENSMUST00000097742	Tmem88b	protein_coding	protein_coding	transmembrane protein 88B [Source:MGI Symbol;Acc:MGI:2444329]	0.4808	3471	GO:0008150	GO:0003674; GO:0030165	GO:0016020; GO:0016021; GO:0005886	TMEM88B	320587	TRUE	-0.269441	2.98284e-05	0.0019136	chr4
ENSMUSG00000044674	ENSMUST00000054294	Fzd1	protein_coding	protein_coding	frizzled class receptor 1 [Source:MGI Symbol;Acc:MGI:1196625]	0.5566	4197	GO:0007166; GO:0016055; GO:0060070; GO:0060412; GO:0030514; GO:0010976; GO:0007165; GO:0007186; GO:0045893; GO:0001934; GO:0009410; GO:0045892; GO:0051091; GO:0090090; GO:0003151; GO:0090179; GO:0035425; GO:0007267; GO:0003149; GO:0003150; GO:0036520; GO:0044338; GO:0044339; GO:0045446; GO:0060022; GO:1903204; GO:1905606	GO:0005515; GO:0004888; GO:0004930; GO:0005102; GO:0042802; GO:0042803; GO:0042813; GO:0030165; GO:0046982; GO:0017147; GO:0005109	GO:0016020; GO:0016021; GO:0005886; GO:0009986; GO:0043005	FZD1	14362	TRUE	0.288036	3.02737e-05	0.00193369	chr5
ENSMUSG00000024121	ENSMUST00000151061; ENSMUST00000024932; ENSMUST00000098862; ENSMUST00000148541; ENSMUST00000156061; ENSMUST00000150647	Atp6v0c	protein_coding	protein_coding	ATPase, H+ transporting, lysosomal V0 subunit C [Source:MGI Symbol;Acc:MGI:88116]	0.5808	1019	GO:1902600; GO:0006811; GO:0070374; GO:0030177; GO:0007042; GO:0007035; GO:1904093	GO:0015078; GO:0005515; GO:0046961; GO:0031625; GO:0008553	GO:0033177; GO:0016020; GO:0016021; GO:0005794; GO:0031410; GO:0045202; GO:0030665; GO:0033179; GO:0030672; GO:0005764; GO:0005773; GO:0005774; GO:0008021; GO:0000220; GO:0016471	ATP6V0C	11984	TRUE	0.138875	3.04975e-05	0.00193951	chr17
ENSMUSG00000041298	ENSMUST00000047257; ENSMUST00000139269; ENSMUST00000110508; ENSMUST00000110509; ENSMUST00000149169; ENSMUST00000152360	Katnal1	protein_coding	protein_coding	katanin p60 subunit A-like 1 [Source:MGI Symbol;Acc:MGI:2387638]	0.5232	2382	GO:0051013; GO:0007283; GO:0000226	GO:0005524; GO:0016887; GO:0008017; GO:0008568; GO:0000166; GO:0016853; GO:0042802	GO:0005874; GO:0005737; GO:0015630; GO:0005856; GO:0005819; GO:0005813; GO:0000922; GO:0008352	KATNAL1	231912	TRUE	-0.162692	3.08328e-05	0.00195235	chr5
ENSMUSG00000044748	ENSMUST00000051017	Defb1	protein_coding	protein_coding	defensin beta 1 [Source:MGI Symbol;Acc:MGI:1096878]	0.3968	872	GO:0006952; GO:0009617; GO:0042742; GO:0045087; GO:0019731; GO:0050830; GO:0050829; GO:0061844; GO:0002227; GO:0035584; GO:0019933; GO:0060474; GO:0002526; GO:0033574	GO:0042802; GO:0031731	GO:0005576; GO:0016020; GO:0005615; GO:0097225; GO:0019898; GO:1990742	DEFB1	13214	TRUE	0.729149	3.18466e-05	0.00200784	chr8
ENSMUSG00000027994	ENSMUST00000029624; ENSMUST00000153506; ENSMUST00000146340; ENSMUST00000122961	Mcub	protein_coding	protein_coding	mitochondrial calcium uniporter dominant negative beta subunit [Source:MGI Symbol;Acc:MGI:1914065]	0.5242	783	GO:0006811; GO:0006816; GO:0051560; GO:0006851; GO:0036444	GO:0005515; GO:0019855	GO:0005739; GO:0005654; GO:0016020; GO:0016021; GO:0043231; GO:0005743; GO:0031224; GO:0034704; GO:0031305; GO:1990246	MCUB	66815	TRUE	0.730808	3.23125e-05	0.00202848	chr3
ENSMUSG00000037370	ENSMUST00000105520; ENSMUST00000039882; ENSMUST00000135846; ENSMUST00000150570; ENSMUST00000142974	Enpp1	protein_coding	protein_coding	ectonucleotide pyrophosphatase/phosphodiesterase 1 [Source:MGI Symbol;Acc:MGI:97370]	0.453	3774	GO:0044238; GO:0006955; GO:0071704; GO:0006807; GO:0006897; GO:0006091; GO:0006796; GO:0009143; GO:0010035; GO:0010467; GO:0030282; GO:0030308; GO:0030318; GO:0030505; GO:0030643; GO:0030730; GO:0031953; GO:0032869; GO:0033198; GO:0045599; GO:0045719; GO:0046034; GO:0046325; GO:0046627; GO:0050427; GO:0055062; GO:0090305; GO:0110148	GO:0016787; GO:0046872; GO:0003676; GO:0005044; GO:0016788; GO:0030247; GO:0004527; GO:0004528; GO:0004551; GO:0005158; GO:0005524; GO:0016791; GO:0042803; GO:0047429; GO:0106177	GO:0016020; GO:0016021; GO:0110165; GO:0005576; GO:0005615; GO:0005886; GO:0009986	ENPP1	18605	TRUE	-0.302763	3.27809e-05	0.00204222	chr10
ENSMUSG00000018599	ENSMUST00000018743; ENSMUST00000154890; ENSMUST00000146159	Mief2	protein_coding	protein_coding	mitochondrial elongation factor 2 [Source:MGI Symbol;Acc:MGI:2144199]	0.6049	1198	GO:0007005; GO:0010821; GO:0090141; GO:0090314; GO:0003374	GO:0005515	GO:0005739; GO:0016020; GO:0016021; GO:0005741	MIEF2	237781	TRUE	0.255344	3.28106e-05	0.00204222	chr11
ENSMUSG00000026393	ENSMUST00000186017; ENSMUST00000187407; ENSMUST00000027642; ENSMUST00000191549	Nek7	protein_coding	protein_coding	NIMA (never in mitosis gene a)-related expressed kinase 7 [Source:MGI Symbol;Acc:MGI:1890645]	0.3989	3995	GO:0006468; GO:0032212; GO:0016310; GO:0018105; GO:0051973; GO:1904355; GO:1900227; GO:0035865	GO:0005524; GO:0004672; GO:0016740; GO:0046872; GO:0000166; GO:0016301; GO:0005515; GO:0004674; GO:0106310	GO:0005654; GO:0005634; GO:0005737; GO:0005815; GO:0005856; GO:0000922	NEK7	59125	TRUE	0.29865	3.31521e-05	0.00205473	chr1
ENSMUSG00000050627	ENSMUST00000146623; ENSMUST00000129305; ENSMUST00000084853; ENSMUST00000146266	Gpd1l	protein_coding	protein_coding	glycerol-3-phosphate dehydrogenase 1-like [Source:MGI Symbol;Acc:MGI:1289257]	0.5316	2223	GO:0005975; GO:0046168; GO:0002027; GO:0006734; GO:2000649; GO:0006072; GO:0010765; GO:0019674; GO:0033137; GO:0060373; GO:0086005; GO:0090038; GO:2000010	GO:0051287; GO:0016616; GO:0004367; GO:0016491; GO:0044325; GO:0042803; GO:0017080	GO:0005737; GO:0005886; GO:0005829; GO:0009331; GO:0016020	GPD1L	333433	TRUE	0.11989	3.44505e-05	0.00212619	chr9
ENSMUSG00000017466	ENSMUST00000017610; ENSMUST00000155707	Timp2	protein_coding	protein_coding	tissue inhibitor of metalloproteinase 2 [Source:MGI Symbol;Acc:MGI:98753]	0.5471	2214	GO:0010466; GO:0010951; GO:1905049	GO:0005515; GO:0008191; GO:0046872; GO:0004857; GO:0030414; GO:0002020; GO:0008270; GO:0140678	GO:0005576	TIMP2	21858	TRUE	0.316842	3.50227e-05	0.00215242	chr11
ENSMUSG00000025743	ENSMUST00000070478; ENSMUST00000146093; ENSMUST00000152591; ENSMUST00000141297; ENSMUST00000140623	Sdc3	protein_coding	protein_coding	syndecan 3 [Source:MGI Symbol;Acc:MGI:1349163]	0.6045	1686	GO:0016477; GO:0007155; GO:0030334	GO:0005515; GO:0042802	GO:0030424; GO:0016020; GO:0016021; GO:0005886; GO:0009986; GO:0032991; GO:0043005; GO:0005796; GO:0044393	SDC3	20970	TRUE	0.177633	3.62523e-05	0.00221867	chr4
ENSMUSG00000039145	ENSMUST00000044009; ENSMUST00000114987; ENSMUST00000130470; ENSMUST00000155927	Camk1d	protein_coding	protein_coding	calcium/calmodulin-dependent protein kinase ID [Source:MGI Symbol;Acc:MGI:2442190]	0.5165	2322	GO:0006468; GO:0043066; GO:0050773; GO:0008152; GO:0016310; GO:0007399; GO:0006954; GO:0050766; GO:0018105; GO:0043065; GO:0010976; GO:0032793; GO:0060267; GO:0071622; GO:0090023	GO:0005524; GO:0004672; GO:0016740; GO:0003824; GO:0000166; GO:0016301; GO:0005516; GO:0004674; GO:0004683; GO:0106310	GO:0005634; GO:0005737	CAMK1D	227541	TRUE	-0.304952	3.69374e-05	0.00225118	chr2
ENSMUSG00000034472	ENSMUST00000139848; ENSMUST00000132133	Rasd2	protein_coding	protein_coding	RASD family, member 2 [Source:MGI Symbol;Acc:MGI:1922391]	0.5583	2054	GO:0051897; GO:0007626; GO:0007610; GO:0031397; GO:0007165; GO:0043949; GO:0033235; GO:0001963	GO:0005525; GO:0003924; GO:0000166; GO:0031681; GO:0043548; GO:0031624	GO:0045202; GO:0016020; GO:0005886	RASD2	75141	TRUE	0.362384	3.72819e-05	0.00226275	chr8
ENSMUSG00000049420	ENSMUST00000217910; ENSMUST00000218232; ENSMUST00000066049; ENSMUST00000219651; ENSMUST00000219338; ENSMUST00000219872	Tmem200a	protein_coding	protein_coding	transmembrane protein 200A [Source:MGI Symbol;Acc:MGI:1924470]	0.5072	2028	GO:0008150	GO:0003674	GO:0005575; GO:0016020; GO:0016021	TMEM200A	77220	TRUE	-1.0248	3.78975e-05	0.00229061	chr10
ENSMUSG00000036427	ENSMUST00000038027; ENSMUST00000135243; ENSMUST00000205870; ENSMUST00000205865; ENSMUST00000205800; ENSMUST00000205983; ENSMUST00000206232; ENSMUST00000206415; ENSMUST00000206603; ENSMUST00000126901; ENSMUST00000138773	Gpi1	protein_coding	protein_coding	glucose-6-phosphate isomerase 1 [Source:MGI Symbol;Acc:MGI:95797]	0.5517	1175	GO:0006096; GO:0006094; GO:0001701; GO:0043524; GO:0043154; GO:0007165; GO:1901135; GO:0042593; GO:0051156; GO:0010595; GO:0002639; GO:0001707; GO:0061621; GO:0043278; GO:0005975; GO:0007611; GO:0032355; GO:0032570; GO:0033574; GO:0034101; GO:0035902; GO:0035994; GO:0046686; GO:0061620	GO:0004347; GO:0016853; GO:0005515; GO:0005125; GO:0008083; GO:0097367; GO:0031625; GO:0048029	GO:0005829; GO:0005737; GO:0005654; GO:0005886; GO:0005576; GO:0005615; GO:0043005; GO:0043209; GO:0060170	GPI	14751	TRUE	0.1649	3.80666e-05	0.00229136	chr7
ENSMUSG00000020811	ENSMUST00000150531; ENSMUST00000021168; ENSMUST00000108511; ENSMUST00000138339; ENSMUST00000108510; ENSMUST00000132095	Wscd1	protein_coding	protein_coding	WSC domain containing 1 [Source:MGI Symbol;Acc:MGI:2448493]	0.5797	1945	GO:0008150	GO:0008146; GO:0003674	GO:0005575; GO:0016020; GO:0016021	WSCD1	216881	TRUE	-0.20716	4.00261e-05	0.00239569	chr11
ENSMUSG00000028161	ENSMUST00000124206; ENSMUST00000070198; ENSMUST00000056758; ENSMUST00000124777; ENSMUST00000196170; ENSMUST00000196603; ENSMUST00000130768; ENSMUST00000130114	Ppp3ca	protein_coding	protein_coding	protein phosphatase 3, catalytic subunit, alpha isoform [Source:MGI Symbol;Acc:MGI:107164]	0.4674	1774	GO:0045944; GO:0071333; GO:0010629; GO:0014898; GO:0048741; GO:0000082; GO:0006470; GO:0016311; GO:0045785; GO:0046676; GO:0048813; GO:0051049; GO:0097720; GO:0051091; GO:0006816; GO:0051592; GO:0019722; GO:0006606; GO:0045669; GO:0030335; GO:0070886; GO:1901387; GO:1905665; GO:0060079; GO:0033555; GO:0035562; GO:0010628; GO:0045672; GO:0050804; GO:0014883; GO:0008544; GO:0030216; GO:0050774; GO:…	GO:0016787; GO:0005515; GO:0044877; GO:0046872; GO:0004721; GO:0005516; GO:0004722; GO:0017018; GO:0051117; GO:0004723; GO:0033192; GO:0019899; GO:0046983; GO:0016018; GO:0140677	GO:0005739; GO:0005634; GO:0045202; GO:0005829; GO:0005737; GO:0005654; GO:0016020; GO:0005886; GO:0042995; GO:0032991; GO:0042383; GO:0098978; GO:0030018; GO:0043197; GO:0009898; GO:0098685; GO:0008287; GO:0036057; GO:0005955	PPP3CA	19055	TRUE	-0.214697	4.01274e-05	0.00239569	chr3
ENSMUSG00000028607	ENSMUST00000030345; ENSMUST00000106720; ENSMUST00000106719; ENSMUST00000175651; ENSMUST00000141738; ENSMUST00000131644	Cpt2	protein_coding	protein_coding	carnitine palmitoyltransferase 2 [Source:MGI Symbol;Acc:MGI:109176]	0.5342	976	GO:0001701; GO:0001676; GO:0006629; GO:0006635; GO:0006631; GO:0120162; GO:0009437	GO:0016746; GO:0016740; GO:0004095; GO:0008458	GO:0005739; GO:0005730; GO:0005654; GO:0016020; GO:0005743	CPT2	12896	TRUE	0.327042	4.07958e-05	0.00242569	chr4
ENSMUSG00000037172	ENSMUST00000101492; ENSMUST00000039008; ENSMUST00000201712; ENSMUST00000200994	Dennd11	protein_coding	protein_coding	DENN domain containing 11 [Source:MGI Symbol;Acc:MGI:2444256]	0.5272	2427	GO:0050790	GO:0003674; GO:0005085	GO:0005737	DENND11	243780	TRUE	-0.200532	4.15923e-05	0.00246304	chr6
ENSMUSG00000079037	ENSMUST00000091288; ENSMUST00000142070	Prnp	protein_coding	protein_coding	prion protein [Source:MGI Symbol;Acc:MGI:97769]	0.501	1252	GO:0051260; GO:0043066; GO:0071466; GO:0043525; GO:0010951; GO:0050731; GO:0031648; GO:0043086; GO:0032880; GO:1904646; GO:0007611; GO:1903078; GO:0061098; GO:0035584; GO:0071280; GO:0006979; GO:1900272; GO:1902430; GO:0001933; GO:0006878; GO:0046688; GO:0046686; GO:0043433; GO:1901216; GO:0032700; GO:0006139; GO:0010942; GO:0032147; GO:0032689; GO:0032703; GO:0046007; GO:0050730; GO:0050860; GO:…	GO:0005515; GO:0044877; GO:0046872; GO:0005507; GO:0005509; GO:0042802; GO:0044325; GO:0005521; GO:0008017; GO:0015631; GO:0060090; GO:0001540; GO:0051087; GO:0019828; GO:1903136; GO:0043008; GO:0140693; GO:0002020; GO:0005539; GO:0031802; GO:0038023; GO:0140311; GO:0140677; GO:1903135	GO:0016020; GO:0014069; GO:0005829; GO:0005737; GO:0016021; GO:0005794; GO:0005886; GO:0031225; GO:0009986; GO:0005634; GO:0043231; GO:0005783; GO:0031965; GO:0016234; GO:0030425; GO:0045121; GO:0005741; GO:0043195	PRNP	19122	TRUE	0.175281	4.23818e-05	0.00249967	chr2
ENSMUSG00000019848	ENSMUST00000175658; ENSMUST00000019994; ENSMUST00000161803	Popdc3	protein_coding	protein_coding	popeye domain containing 3 [Source:MGI Symbol;Acc:MGI:1930153]	0.5066	1335	GO:0042391; GO:0007507; GO:0007519; GO:0051146	GO:0000166; GO:0030552	GO:0016020; GO:0016021; GO:0042383	POPDC3	78977	TRUE	-1.62198	4.4898e-05	0.00263214	chr10
ENSMUSG00000033579	ENSMUST00000159336; ENSMUST00000038475; ENSMUST00000162216; ENSMUST00000162463	Fa2h	protein_coding	protein_coding	fatty acid 2-hydroxylase [Source:MGI Symbol;Acc:MGI:2443327]	0.5487	1740	GO:0008610; GO:0006629; GO:0006665; GO:0006631; GO:0006633; GO:0046513; GO:0061436; GO:0042634; GO:0006682; GO:0006679; GO:0032287; GO:0032286; GO:0001949; GO:0030258; GO:0044857; GO:1904002; GO:1904697	GO:0016491; GO:0020037; GO:0005506; GO:0046872; GO:0080132	GO:0016020; GO:0016021; GO:0005783; GO:0005789; GO:0043231	FA2H	338521	TRUE	-0.258194	4.49877e-05	0.00263214	chr8
ENSMUSG00000003746	ENSMUST00000003843; ENSMUST00000105470; ENSMUST00000218317; ENSMUST00000220088; ENSMUST00000219234; ENSMUST00000146483; ENSMUST00000105469; ENSMUST00000133330	Man1a	protein_coding	protein_coding	mannosidase 1, alpha [Source:MGI Symbol;Acc:MGI:104677]	0.5114	2799	GO:0006486; GO:0008152; GO:0005975; GO:0045047; GO:0006491; GO:0030433; GO:1904382	GO:0005509; GO:0004571; GO:0046872; GO:0016787; GO:0016798	GO:0016020; GO:0005829; GO:0016021; GO:0000139; GO:0005794; GO:0031410; GO:0005793; GO:0005783	MAN1A1	17155	TRUE	-0.402434	4.60235e-05	0.00268201	chr10
ENSMUSG00000067578	ENSMUST00000087950	Cbln4	protein_coding	protein_coding	cerebellin 4 precursor protein [Source:MGI Symbol;Acc:MGI:2154433]	0.49	2902	GO:0009306; GO:1904862; GO:0099558	GO:0005515	GO:0005615; GO:0045202; GO:0005576; GO:0098982	CBLN4	228942	TRUE	-1.22006	4.75026e-05	0.00275722	chr2
ENSMUSG00000028273	ENSMUST00000029941; ENSMUST00000195975; ENSMUST00000200043; ENSMUST00000196220; ENSMUST00000198381; ENSMUST00000196050; ENSMUST00000200650; ENSMUST00000197808; ENSMUST00000170361; ENSMUST00000090134; ENSMUST00000168967; ENSMUST00000196908; ENSMUST00000058626	Pdlim5	protein_coding	protein_coding	PDZ and LIM domain 5 [Source:MGI Symbol;Acc:MGI:1927489]	0.4861	1753	GO:0030036; GO:0061001; GO:0007507; GO:0061061; GO:0061049; GO:0051963	GO:0005515; GO:0046872; GO:0003779; GO:0042805; GO:0051371; GO:0047485; GO:0005080	GO:0014069; GO:0005829; GO:0005737; GO:0045202; GO:0042995; GO:0016020; GO:0098793; GO:0030018; GO:0005912; GO:0098794; GO:0015629; GO:0001725; GO:0031941	PDLIM5	56376	TRUE	-0.201108	4.95577e-05	0.00286514	chr3
ENSMUSG00000042331	ENSMUST00000201866; ENSMUST00000201671; ENSMUST00000202178; ENSMUST00000136971; ENSMUST00000202389; ENSMUST00000202869; ENSMUST00000201624; ENSMUST00000049836; ENSMUST00000202905; ENSMUST00000201364; ENSMUST00000108709; ENSMUST00000092415; ENSMUST00000201015; ENSMUST00000200742; ENSMUST00000202744; ENSMUST00000201723; ENSMUST00000202179	Specc1	protein_coding	protein_coding	sperm antigen with calponin homology and coiled-coil domains 1 [Source:MGI Symbol;Acc:MGI:2442356]	0.5187	3432	GO:0030036; GO:0001824; GO:0008306	GO:0003674; GO:0005515	GO:0005634; GO:0005829; GO:0005737; GO:0005654; GO:0016020; GO:0043231; GO:0045177; GO:0001650; GO:0005815; GO:0031941	SPECC1	432572	TRUE	-0.184407	5.14563e-05	0.00296319	chr11
ENSMUSG00000000861	ENSMUST00000000881; ENSMUST00000109516; ENSMUST00000124148; ENSMUST00000109514; ENSMUST00000118955; ENSMUST00000127494	Bcl11a	protein_coding	protein_coding	B cell CLL/lymphoma 11A (zinc finger protein) [Source:MGI Symbol;Acc:MGI:106190]	0.48	3222	GO:0010629; GO:0010628; GO:0010467; GO:0000122; GO:0010976; GO:0050773; GO:0010977; GO:0006357; GO:0006354; GO:0030183; GO:0016925; GO:0030217; GO:2000171; GO:1903860; GO:0048672; GO:2000173; GO:0048671; GO:1904800; GO:1905232	GO:0000978; GO:0046872; GO:0003700; GO:0005515; GO:0042803; GO:0003712; GO:0019901; GO:0046982; GO:0001227; GO:0003714; GO:0140297; GO:0001067	GO:0005634; GO:0014069; GO:0005737; GO:0005654; GO:0042382; GO:0016514; GO:0016604	BCL11A	14025	TRUE	-0.629825	5.39675e-05	0.00309562	chr11
ENSMUSG00000053965	ENSMUST00000066728; ENSMUST00000200389; ENSMUST00000198314; ENSMUST00000199253	Pde5a	protein_coding	protein_coding	phosphodiesterase 5A, cGMP-specific [Source:MGI Symbol;Acc:MGI:2651499]	0.4635	4487	GO:0007165; GO:0008152; GO:0043065; GO:0048599; GO:0045907; GO:0042098; GO:0042130; GO:0055119; GO:0002026; GO:0046068; GO:0046069; GO:0007614; GO:0002678; GO:0043406; GO:0010613; GO:0010749; GO:0055118; GO:0045745; GO:0060282	GO:0005515; GO:0004114; GO:0008081; GO:0046872; GO:0016787; GO:0003824; GO:0000166; GO:0047555; GO:0030553; GO:0004112	GO:0005829	PDE5A	242202	TRUE	-0.539004	5.71152e-05	0.00326338	chr3
ENSMUSG00000031995	ENSMUST00000034478; ENSMUST00000148789; ENSMUST00000217404; ENSMUST00000133904; ENSMUST00000214418; ENSMUST00000123557	St14	protein_coding	protein_coding	suppression of tumorigenicity 14 (colon carcinoma) [Source:MGI Symbol;Acc:MGI:1338881]	0.5612	1944	GO:0006508; GO:0016477; GO:0030163; GO:0001843; GO:0030216; GO:0060672	GO:0005515; GO:0004252; GO:0016787; GO:0008233; GO:0008236	GO:0016020; GO:0016021; GO:0005615; GO:0005576; GO:0005887; GO:0016323; GO:0005886; GO:0019897	ST14	19143	TRUE	0.653547	5.81554e-05	0.00330326	chr9
ENSMUSG00000004032	ENSMUST00000004134; ENSMUST00000167523; ENSMUST00000170058; ENSMUST00000172247; ENSMUST00000167387; ENSMUST00000169365	Gstm5	protein_coding	protein_coding	glutathione S-transferase, mu 5 [Source:MGI Symbol;Acc:MGI:1309466]	0.4923	827	GO:0006749; GO:0042178; GO:0018916; GO:0070458; GO:0043627	GO:0005515; GO:0016740; GO:0004364; GO:0042802; GO:0042803; GO:0019899; GO:0043295	GO:0005829; GO:0005737; GO:0045171; GO:0035686	GSTM3	14866	TRUE	0.1789	5.8312e-05	0.00330326	chr3
ENSMUSG00000000085	ENSMUST00000134375; ENSMUST00000000087; ENSMUST00000151345; ENSMUST00000153099; ENSMUST00000132116; ENSMUST00000106301; ENSMUST00000064991; ENSMUST00000106298; ENSMUST00000144555; ENSMUST00000122860; ENSMUST00000136801; ENSMUST00000144862; ENSMUST00000133290; ENSMUST00000133169	Scmh1	protein_coding	protein_coding	sex comb on midleg homolog 1 [Source:MGI Symbol;Acc:MGI:1352762]	0.5071	1541	GO:0006355; GO:0007283; GO:0045892; GO:0006338; GO:0009952; GO:0031507	GO:0005515; GO:0042393; GO:0003682	GO:0005634; GO:0001673; GO:0010369	SCMH1	29871	TRUE	0.209366	5.84908e-05	0.00330326	chr4
ENSMUSG00000028108	ENSMUST00000117507; ENSMUST00000029753; ENSMUST00000144958; ENSMUST00000123143; ENSMUST00000131376; ENSMUST00000128885; ENSMUST00000153026; ENSMUST00000137912; ENSMUST00000155815; ENSMUST00000147217	Ecm1	protein_coding	protein_coding	extracellular matrix protein 1 [Source:MGI Symbol;Acc:MGI:103060]	0.5746	958	GO:0007165; GO:0045766; GO:0006954; GO:0006357; GO:2000404; GO:0001503; GO:0010466; GO:0001525; GO:0031214; GO:0001960; GO:0001938; GO:0030500; GO:0002063; GO:0030502; GO:0003416; GO:0002828	GO:0005515; GO:0002020; GO:0008022; GO:0019899; GO:0005201; GO:0043236; GO:0005134	GO:0005576; GO:0005615; GO:0062023	ECM1	13601	TRUE	-0.534789	6.48475e-05	0.00364817	chr3
ENSMUSG00000028412	ENSMUST00000107646; ENSMUST00000102911; ENSMUST00000136607; ENSMUST00000107651; ENSMUST00000107647; ENSMUST00000107645; ENSMUST00000133582	Slc44a1	protein_coding	protein_coding	solute carrier family 44, member 1 [Source:MGI Symbol;Acc:MGI:2140592]	0.4793	2141	GO:0055085; GO:0015695; GO:0071705; GO:0015871	GO:0022857; GO:0015101; GO:0015220	GO:0016020; GO:0016021; GO:0005886; GO:0005739; GO:0005829; GO:0005654; GO:0005741	SLC44A1	100434	TRUE	-0.244626	6.89036e-05	0.0038615	chr4
ENSMUSG00000005251	ENSMUST00000019386	Ripk4	protein_coding	protein_coding	receptor-interacting serine-threonine kinase 4 [Source:MGI Symbol;Acc:MGI:1919638]	0.5375	3591	GO:0006468; GO:0016310; GO:0051092; GO:0002009	GO:0005515; GO:0005524; GO:0004672; GO:0016740; GO:0000166; GO:0016301; GO:0004674; GO:0106310	GO:0005737; GO:0016020	RIPK4	72388	TRUE	0.826829	7.04512e-05	0.00393317	chr16
ENSMUSG00000035783	ENSMUST00000039631; ENSMUST00000238147	Acta2	protein_coding	protein_coding	actin alpha 2, smooth muscle, aorta [Source:MGI Symbol;Acc:MGI:87909]	0.5015	1430	GO:0008217; GO:0070374; GO:0006936; GO:0010628; GO:0014829; GO:2000491; GO:0009615; GO:0061041; GO:0061870; GO:0061874; GO:0072144; GO:0090131	GO:0005515; GO:0000166; GO:0005524; GO:0019901	GO:0005737; GO:0005856; GO:0031514; GO:0005869; GO:0015629; GO:0005604; GO:0001725; GO:0030485; GO:0030027; GO:0030175; GO:0032991; GO:0044297	ACTA2	11475	TRUE	-0.473985	7.15605e-05	0.00396714	chr19
ENSMUSG00000045636	ENSMUST00000059115; ENSMUST00000093534; ENSMUST00000118835; ENSMUST00000051379; ENSMUST00000135194; ENSMUST00000155626; ENSMUST00000117735; ENSMUST00000131965; ENSMUST00000155174; ENSMUST00000142936; ENSMUST00000127665; ENSMUST00000143853; ENSMUST00000145860; ENSMUST00000155055	Mtus1	protein_coding	protein_coding	mitochondrial tumor suppressor 1 [Source:MGI Symbol;Acc:MGI:2142572]	0.4782	2119			GO:0005634	MTUS1	102103	TRUE	-0.174439	7.20854e-05	0.00396714	chr8
ENSMUSG00000045087	ENSMUST00000122088	S1pr5	protein_coding	protein_coding	sphingosine-1-phosphate receptor 5 [Source:MGI Symbol;Acc:MGI:2150641]	0.5712	2500	GO:0007186; GO:0007165; GO:0007189; GO:0019222; GO:0003376; GO:0045664	GO:0004930; GO:0038036	GO:0016021; GO:0016020; GO:0005886; GO:0005737	S1PR5	94226	TRUE	-0.345878	7.22249e-05	0.00396714	chr9
ENSMUSG00000022136	ENSMUST00000022734	Dnajc3	protein_coding	protein_coding	DnaJ heat shock protein family (Hsp40) member C3 [Source:MGI Symbol;Acc:MGI:107373]	0.432	5141	GO:0043066; GO:0006986; GO:0006417; GO:0034976; GO:0006469; GO:1903912; GO:0051603; GO:0070417; GO:0030968; GO:0034975; GO:0036494	GO:0005515; GO:0019901; GO:0004860; GO:0051087; GO:0051787	GO:0005737; GO:0005783; GO:0005829; GO:0005790; GO:0005788	DNAJC3	100037258	TRUE	-0.217919	7.23333e-05	0.00396714	chr14
ENSMUSG00000031608	ENSMUST00000034021; ENSMUST00000110316; ENSMUST00000139417; ENSMUST00000156907	Galnt7	protein_coding	protein_coding	polypeptide N-acetylgalactosaminyltransferase 7 [Source:MGI Symbol;Acc:MGI:1349449]	0.4563	2666	GO:0006486; GO:0006493	GO:0016740; GO:0016757; GO:0046872; GO:0004653; GO:0030246	GO:0016020; GO:0016021; GO:0000139; GO:0005794	GALNT7	108150	TRUE	-0.395319	7.24159e-05	0.00396714	chr8
ENSMUSG00000041598	ENSMUST00000106616; ENSMUST00000053536; ENSMUST00000131488; ENSMUST00000153453	Cdc42ep4	protein_coding	protein_coding	CDC42 effector protein (Rho GTPase binding) 4 [Source:MGI Symbol;Acc:MGI:1929760]	0.6046	1926	GO:0071346; GO:0008360; GO:0007266; GO:0031274; GO:0030838	GO:0005515	GO:0005737; GO:0016020; GO:0005886; GO:0015630; GO:0005856; GO:0012505; GO:0015629; GO:0045335; GO:0005912	CDC42EP4	56699	TRUE	0.267963	7.41893e-05	0.00404155	chr11
ENSMUSG00000034891	ENSMUST00000036825; ENSMUST00000134110; ENSMUST00000153829; ENSMUST00000138067	Sncb	protein_coding	protein_coding	synuclein, beta [Source:MGI Symbol;Acc:MGI:1889011]	0.5899	841	GO:0043524; GO:0051402; GO:0050808; GO:0007268; GO:0042417; GO:0048488; GO:1901214	GO:0005509; GO:0043014; GO:0048487; GO:1903136; GO:0046914	GO:0005739; GO:0045202; GO:0005737; GO:0043025; GO:0030426; GO:0016234; GO:0043679; GO:0043195; GO:0099523	SNCB	104069	TRUE	0.183488	7.43297e-05	0.00404155	chr13
ENSMUSG00000027963	ENSMUST00000029575; ENSMUST00000106501; ENSMUST00000128228; ENSMUST00000145945; ENSMUST00000149920; ENSMUST00000106502	Extl2	protein_coding	protein_coding	exostosin-like glycosyltransferase 2 [Source:MGI Symbol;Acc:MGI:1889574]	0.4848	1677	GO:0006486; GO:0006044; GO:0019276	GO:0016757; GO:0016740; GO:0046872; GO:0030145; GO:0001888; GO:0005539; GO:0035248; GO:0047237	GO:0016021; GO:0005829; GO:0005654; GO:0016020; GO:0005783; GO:0005789	EXTL2	58193	TRUE	-0.21566	7.46031e-05	0.00404155	chr3
ENSMUSG00000068373	ENSMUST00000136156; ENSMUST00000141159; ENSMUST00000089726; ENSMUST00000230671; ENSMUST00000155458; ENSMUST00000156278; ENSMUST00000149165	D430041D05Rik	protein_coding	protein_coding	RIKEN cDNA D430041D05 gene [Source:MGI Symbol;Acc:MGI:2181743]	0.5118	7492		GO:0003674	GO:0005575; GO:0016020; GO:0016021	KIAA1549L	241589	TRUE	0.290589	7.56705e-05	0.00407645	chr2
ENSMUSG00000021838	ENSMUST00000022386; ENSMUST00000228404; ENSMUST00000100672; ENSMUST00000141767; ENSMUST00000137543; ENSMUST00000125113; ENSMUST00000140571; ENSMUST00000226684; ENSMUST00000125688; ENSMUST00000227848; ENSMUST00000130046	Samd4	protein_coding	protein_coding	sterile alpha motif domain containing 4 [Source:MGI Symbol;Acc:MGI:1921730]	0.534	2292	GO:0045727; GO:0006417; GO:0017148; GO:0043488; GO:0000289	GO:0005515; GO:0003723; GO:0003729; GO:0030371	GO:0045202; GO:0005829; GO:0005737; GO:0042995; GO:0030425; GO:0030054; GO:0043005; GO:0001650; GO:0000932	SAMD4A	74480	TRUE	-0.390395	7.59702e-05	0.00407645	chr14
ENSMUSG00000003352	ENSMUST00000229223; ENSMUST00000230769; ENSMUST00000109150; ENSMUST00000229282; ENSMUST00000003442; ENSMUST00000230490; ENSMUST00000230064	Cacnb3	protein_coding	protein_coding	calcium channel, voltage-dependent, beta 3 subunit [Source:MGI Symbol;Acc:MGI:103307]	0.5959	1644	GO:0070588; GO:0006811; GO:0034765; GO:0006816; GO:0007268; GO:0072659; GO:0050852; GO:0007528; GO:2000463; GO:0060402; GO:0090314; GO:0061577; GO:0098903; GO:1901387; GO:1901843; GO:1902630; GO:0050966; GO:1901386; GO:1901385; GO:1905788	GO:0005515; GO:0005245; GO:0005244; GO:0005262; GO:0019901; GO:0005246; GO:0008331	GO:0005891; GO:0005737; GO:0110165; GO:0045202; GO:0016324; GO:0016020; GO:0005886; GO:1990454	CACNB3	12297	TRUE	0.248329	7.60833e-05	0.00407645	chr15
ENSMUSG00000026519	ENSMUST00000161847; ENSMUST00000162283; ENSMUST00000027800; ENSMUST00000159436; ENSMUST00000161523; ENSMUST00000160508; ENSMUST00000160536; ENSMUST00000161942	Tmem63a	protein_coding	protein_coding	transmembrane protein 63a [Source:MGI Symbol;Acc:MGI:2384789]	0.5494	1208	GO:0034220; GO:0098655; GO:0006811	GO:0005227; GO:0003676; GO:0008381; GO:1990760	GO:0016020; GO:0016021; GO:0005886; GO:0043231; GO:0034451; GO:0005764; GO:0005765	TMEM63A	208795	TRUE	-0.264725	7.79121e-05	0.0041465	chr1
ENSMUSG00000029314	ENSMUST00000144623; ENSMUST00000112887; ENSMUST00000031255; ENSMUST00000092990; ENSMUST00000145612	Gpat3	protein_coding	protein_coding	glycerol-3-phosphate acyltransferase 3 [Source:MGI Symbol;Acc:MGI:3603816]	0.5268	1941	GO:0006629; GO:0008654; GO:0016024; GO:0006072; GO:0032006; GO:0019432	GO:0016746; GO:0005515; GO:0016740; GO:0008374; GO:0003841; GO:0004366; GO:0102420	GO:0016020; GO:0016021; GO:0005783; GO:0005789	GPAT3	231510	TRUE	-0.356121	7.79578e-05	0.0041465	chr5
ENSMUSG00000031485	ENSMUST00000033875; ENSMUST00000209525; ENSMUST00000209856; ENSMUST00000098851; ENSMUST00000211393; ENSMUST00000211518; ENSMUST00000211490; ENSMUST00000209555; ENSMUST00000211281; ENSMUST00000210141; ENSMUST00000210765; ENSMUST00000210225; ENSMUST00000211012; ENSMUST00000211756	Plpbp	protein_coding	protein_coding	pyridoxal phosphate binding protein [Source:MGI Symbol;Acc:MGI:1891207]	0.5023	1614		GO:0030170	GO:0005739; GO:0005829	PLPBP	114863	TRUE	-0.21102	8.32093e-05	0.00440979	chr8
ENSMUSG00000026675	ENSMUST00000027989; ENSMUST00000133563; ENSMUST00000111353; ENSMUST00000123230	Hsd17b7	protein_coding	protein_coding	hydroxysteroid (17-beta) dehydrogenase 7 [Source:MGI Symbol;Acc:MGI:1330808]	0.4826	1865	GO:0006694; GO:0006629; GO:0007399; GO:0007420; GO:0048706; GO:0030154; GO:0016125; GO:0006695; GO:0006703; GO:0008209; GO:0048568	GO:0016491; GO:0005148; GO:0004303; GO:0000253; GO:0047024; GO:0102176	GO:0016020; GO:0016021; GO:0005783; GO:0005789	HSD17B7	15490	TRUE	0.359292	8.35483e-05	0.00441177	chr1
ENSMUSG00000051726	ENSMUST00000170580	Kcnf1	protein_coding	protein_coding	potassium voltage-gated channel, subfamily F, member 1 [Source:MGI Symbol;Acc:MGI:2687399]	0.5417	4789	GO:0055085; GO:0006811; GO:0051260; GO:0006813; GO:0034765; GO:0071805; GO:1905515	GO:0005216; GO:0005244; GO:0005249; GO:0005267	GO:0016020; GO:0016021; GO:0008076; GO:0097546	KCNF1	382571	TRUE	0.45995	8.43006e-05	0.0044154	chr12
ENSMUSG00000040339	ENSMUST00000046924; ENSMUST00000171143	Fam102b	protein_coding	protein_coding	family with sequence similarity 102, member B [Source:MGI Symbol;Acc:MGI:3036259]	0.4386	5535	GO:0008150	GO:0003674	GO:0005575		329739	TRUE	0.274037	8.45653e-05	0.0044154	chr3
ENSMUSG00000035666	ENSMUST00000171404; ENSMUST00000037117; ENSMUST00000156468; ENSMUST00000124390	Gtf3c4	protein_coding	protein_coding	general transcription factor IIIC, polypeptide 4 [Source:MGI Symbol;Acc:MGI:2138937]	0.5502	3848	GO:0006384; GO:0016573; GO:0008150	GO:0004402; GO:0003674; GO:0003677; GO:0016740; GO:0016746; GO:0000995	GO:0000127; GO:0005739; GO:0005654; GO:0005634	GTF3C4	269252	TRUE	-0.168763	8.46358e-05	0.0044154	chr2
ENSMUSG00000030201	ENSMUST00000032322; ENSMUST00000111950; ENSMUST00000203016; ENSMUST00000203773; ENSMUST00000126836; ENSMUST00000203235	Lrp6	protein_coding	protein_coding	low density lipoprotein receptor-related protein 6 [Source:MGI Symbol;Acc:MGI:1298218]	0.4556	2960	GO:0016055; GO:0006897; GO:0001933; GO:0006355; GO:0006469; GO:0007204; GO:0007268; GO:0014029; GO:0014033; GO:0034392; GO:0043434; GO:0045787; GO:0045893; GO:0045944; GO:0051091; GO:0060070; GO:0071397; GO:0071901; GO:0072659; GO:0098609; GO:1901998	GO:0005515; GO:0005041; GO:0005102; GO:0005109; GO:0017147; GO:0019210; GO:0019534; GO:0042802; GO:0042803; GO:0042813; GO:0071936	GO:0016020; GO:0016021; GO:0005886; GO:0005769; GO:0005794; GO:0005901; GO:0009986; GO:0031410; GO:0043025; GO:0045202; GO:1990851; GO:1990909	LRP6	16974	TRUE	-0.219368	8.48245e-05	0.0044154	chr6
ENSMUSG00000026737	ENSMUST00000006912; ENSMUST00000148583; ENSMUST00000152981	Pip4k2a	protein_coding	protein_coding	phosphatidylinositol-5-phosphate 4-kinase, type II, alpha [Source:MGI Symbol;Acc:MGI:1298206]	0.4487	1478	GO:0046488; GO:0046627; GO:0016310; GO:0006629; GO:0046854; GO:0010506; GO:2000786; GO:0035855; GO:0061909; GO:0090119; GO:0090217; GO:1902635	GO:0016307; GO:0016740; GO:0000166; GO:0005524; GO:0016301; GO:0005515; GO:0042803; GO:0016308; GO:0016309	GO:0005829; GO:0005634; GO:0005737; GO:0016020; GO:0005886; GO:0042995; GO:0005764; GO:0005776; GO:0001917; GO:0001750	PIP4K2A	18718	TRUE	-0.247263	8.53274e-05	0.00442583	chr2
ENSMUSG00000063600	ENSMUST00000124809; ENSMUST00000146943; ENSMUST00000126420; ENSMUST00000119598; ENSMUST00000118531; ENSMUST00000143483; ENSMUST00000140288	Egfem1	protein_coding	protein_coding	EGF-like and EMI domain containing 1 [Source:MGI Symbol;Acc:MGI:1922990]	0.4962	1336	GO:0008150	GO:0005515; GO:0005509; GO:0003674	GO:0005575	EGFEM1P	75740	TRUE	0.412619	8.58141e-05	0.00443534	chr3
ENSMUSG00000045259	ENSMUST00000061878	Klhdc9	protein_coding	protein_coding	kelch domain containing 9 [Source:MGI Symbol;Acc:MGI:1916124]	0.5488	1558	GO:0008150	GO:0003674; GO:0030332	GO:0005575	KLHDC9	68874	TRUE	0.595065	8.68189e-05	0.00447148	chr1
ENSMUSG00000017897	ENSMUST00000088132; ENSMUST00000063433; ENSMUST00000150669; ENSMUST00000150638; ENSMUST00000128696; ENSMUST00000128280	Eya2	protein_coding	protein_coding	EYA transcriptional coactivator and phosphatase 2 [Source:MGI Symbol;Acc:MGI:109341]	0.5583	1237	GO:0006281; GO:0006974; GO:0006325; GO:0030154; GO:0097192; GO:0006470; GO:0014706; GO:0045739; GO:0048856; GO:0097345; GO:2001240	GO:0046872; GO:0016787; GO:0004721; GO:0004725; GO:0005515; GO:0000287	GO:0005634; GO:0005739; GO:0005829; GO:0005737	EYA2	14049	TRUE	-1.13121	8.78589e-05	0.00450334	chr2
ENSMUSG00000020640	ENSMUST00000218402; ENSMUST00000217981; ENSMUST00000062580; ENSMUST00000220311; ENSMUST00000218072; ENSMUST00000217942; ENSMUST00000219007; ENSMUST00000219832; ENSMUST00000217672; ENSMUST00000218985; ENSMUST00000219182; ENSMUST00000218923; ENSMUST00000219308; ENSMUST00000218084; ENSMUST00000218211	Itsn2	protein_coding	protein_coding	intersectin 2 [Source:MGI Symbol;Acc:MGI:1338049]	0.4785	2805	GO:0006897; GO:0050790; GO:1903861	GO:0005515; GO:0005509; GO:0046872; GO:0005085	GO:0005813	ITSN2	20403	TRUE	-0.257083	8.80534e-05	0.00450334	chr12
ENSMUSG00000075284	ENSMUST00000094681; ENSMUST00000102680; ENSMUST00000102679; ENSMUST00000141264; ENSMUST00000151939; ENSMUST00000143061; ENSMUST00000129594	Wipf1	protein_coding	protein_coding	WAS/WASL interacting protein family, member 1 [Source:MGI Symbol;Acc:MGI:2178801]	0.5367	1825	GO:0008154; GO:0030036; GO:0046827; GO:0051707; GO:0030048	GO:0003779; GO:0005515; GO:0017124; GO:0044183	GO:0005737; GO:0031410; GO:0005856; GO:0042995; GO:0015629; GO:0001726; GO:0005884	WIPF1	215280	TRUE	-0.249348	8.90827e-05	0.00454011	chr2
ENSMUSG00000042834	ENSMUST00000168890; ENSMUST00000171533; ENSMUST00000237066; ENSMUST00000051087	Nrep	protein_coding	protein_coding	neuronal regeneration related protein [Source:MGI Symbol;Acc:MGI:99444]	0.4768	1750	GO:0045664; GO:0017015; GO:0031103	GO:0005515	GO:0005634; GO:0005737	NREP	27528	TRUE	0.275241	8.96684e-05	0.00455409	chr18
ENSMUSG00000016559	ENSMUST00000106454; ENSMUST00000016703; ENSMUST00000139623; ENSMUST00000139378	H3f3b	protein_coding	protein_coding	H3.3 histone B [Source:MGI Symbol;Acc:MGI:1101768]	0.5118	1538	GO:0007283; GO:0035264; GO:0007566; GO:0001649; GO:0008283; GO:0007338; GO:0001556; GO:0007286; GO:0008584; GO:0048477; GO:0006997; GO:0042692; GO:0031508; GO:0031509; GO:0007420; GO:0009725; GO:0090230; GO:1902340	GO:0003677; GO:0030527; GO:0000978; GO:0046982; GO:0000979; GO:0031492	GO:0000786; GO:0005634; GO:0000785; GO:0032991; GO:0000781; GO:0005694; GO:0005654; GO:0000228; GO:0000775; GO:0000939; GO:0001740	H3-3A,H3-3B	15081	TRUE	0.166819	9.00394e-05	0.00455711	chr11
ENSMUSG00000017692	ENSMUST00000017836; ENSMUST00000138846; ENSMUST00000157016	Rhbdl3	protein_coding	protein_coding	rhomboid like 3 [Source:MGI Symbol;Acc:MGI:2179276]	0.5348	1772	GO:0006508	GO:0005509; GO:0004252; GO:0016787; GO:0008233; GO:0008236	GO:0016021; GO:0016020	RHBDL3	246104	TRUE	-0.585959	9.41247e-05	0.00474745	chr11
ENSMUSG00000040998	ENSMUST00000042744; ENSMUST00000117811; ENSMUST00000042729; ENSMUST00000117456; ENSMUST00000117164; ENSMUST00000093971; ENSMUST00000132732	Npnt	protein_coding	protein_coding	nephronectin [Source:MGI Symbol;Acc:MGI:2148811]	0.5069	2924	GO:0007179; GO:0030154; GO:0007155; GO:0010811; GO:0030198; GO:0007160; GO:0030511; GO:0045184; GO:0045944; GO:0051145; GO:0001658; GO:0001657; GO:0045669; GO:0070374; GO:0071356; GO:0045987; GO:0097195; GO:0010694; GO:0033631	GO:0005509; GO:0005178; GO:0005201	GO:0016020; GO:0110165; GO:0005576; GO:0031012; GO:0005604; GO:0062023; GO:0030485	NPNT	114249	TRUE	-0.725507	9.48777e-05	0.00476899	chr3
ENSMUSG00000001089	ENSMUST00000170102; ENSMUST00000105849; ENSMUST00000142248; ENSMUST00000129230; ENSMUST00000063021; ENSMUST00000001116; ENSMUST00000168936	Luzp1	protein_coding	protein_coding	leucine zipper protein 1 [Source:MGI Symbol;Acc:MGI:107629]	0.4864	3881	GO:0060840; GO:0003281; GO:0021503	GO:0003674	GO:0005634	LUZP1	269593	TRUE	-0.271659	9.57734e-05	0.00477707	chr4
ENSMUSG00000031109	ENSMUST00000167659; ENSMUST00000114914; ENSMUST00000114918; ENSMUST00000033437; ENSMUST00000114912; ENSMUST00000114911; ENSMUST00000155770; ENSMUST00000137518; ENSMUST00000141393	Enox2	protein_coding	protein_coding	ecto-NOX disulfide-thiol exchanger 2 [Source:MGI Symbol;Acc:MGI:2384799]	0.4693	2424	GO:0048511; GO:0007624; GO:0022900	GO:0003723; GO:0003676; GO:0016491; GO:0015035	GO:0016020; GO:0005886; GO:0009897; GO:0005576; GO:0005615	ENOX2	209224	TRUE	-0.318616	9.58472e-05	0.00477707	chrX
ENSMUSG00000027978	ENSMUST00000029603	Prss12	protein_coding	protein_coding	protease, serine 12 neurotrypsin (motopsin) [Source:MGI Symbol;Acc:MGI:1100881]	0.5657	2602	GO:0006508; GO:0006887; GO:0006897; GO:0031638	GO:0005044; GO:0004252; GO:0016787; GO:0008233; GO:0008236	GO:0016020; GO:0045202; GO:0005886; GO:0005576; GO:0030424; GO:0031410; GO:0030425; GO:0043195; GO:0043083	PRSS12	19142	TRUE	-1.21528	9.60182e-05	0.00477707	chr3
ENSMUSG00000001227	ENSMUST00000001256; ENSMUST00000167545	Sema6b	protein_coding	protein_coding	sema domain, transmembrane domain (TM), and cytoplasmic domain, (semaphorin) 6B [Source:MGI Symbol;Acc:MGI:1202889]	0.6313	3446	GO:0007417; GO:0007399; GO:0030154; GO:0007411; GO:0050919; GO:0021766; GO:0001755; GO:0030335; GO:0048843; GO:0071526	GO:0005515; GO:0030215; GO:0045499	GO:0016020; GO:0016021; GO:0005615; GO:0005886; GO:0005887	SEMA6B	20359	TRUE	0.209448	9.86348e-05	0.00487666	chr17
ENSMUSG00000022540	ENSMUST00000202281; ENSMUST00000023191; ENSMUST00000090453; ENSMUST00000201726; ENSMUST00000202640; ENSMUST00000201118; ENSMUST00000202720; ENSMUST00000201077; ENSMUST00000201651; ENSMUST00000202998	Rogdi	protein_coding	protein_coding	rogdi homolog [Source:MGI Symbol;Acc:MGI:1913299]	0.5924	726	GO:0008284; GO:0022008; GO:0007420; GO:0030097; GO:0042475	GO:0003674	GO:0005634; GO:0031410; GO:0045202; GO:0042995; GO:0030425; GO:0043204; GO:0008021; GO:0030424; GO:0005635; GO:0098793; GO:0043291	ROGDI	66049	TRUE	0.238111	9.89449e-05	0.00487666	chr16
ENSMUSG00000030259	ENSMUST00000111704; ENSMUST00000140966; ENSMUST00000032388; ENSMUST00000058538	Rassf8	protein_coding	protein_coding	Ras association (RalGDS/AF-6) domain family (N-terminal) member 8 [Source:MGI Symbol;Acc:MGI:1918573]	0.4984	2184	GO:0007165			RASSF8	71323	TRUE	-0.276672	9.90202e-05	0.00487666	chr6
ENSMUSG00000034327	ENSMUST00000152243; ENSMUST00000078053; ENSMUST00000145542; ENSMUST00000125212; ENSMUST00000150768; ENSMUST00000156700	Kctd9	protein_coding	protein_coding	potassium channel tetramerisation domain containing 9 [Source:MGI Symbol;Acc:MGI:2145579]	0.4606	1818	GO:0051260; GO:0008150; GO:0016567; GO:0035556	GO:0005515; GO:0003674; GO:0042802; GO:0097602; GO:0043621		KCTD9	105440	TRUE	-0.375314	0.00010025	0.00492065	chr14
ENSMUSG00000112358	ENSMUST00000219501	Gm33869	protein_coding	TEC	predicted gene, 33869 [Source:MGI Symbol;Acc:MGI:5593028]	0.3577	3142					102636931	TRUE	-1.54075	0.000101245	0.00495287	chr12
ENSMUSG00000000982	ENSMUST00000001008	Ccl3	protein_coding	protein_coding	chemokine (C-C motif) ligand 3 [Source:MGI Symbol;Acc:MGI:98260]	0.4621	766	GO:0006955; GO:0045944; GO:0007165; GO:0006816; GO:0007186; GO:0008360; GO:0006954; GO:0007010; GO:0023052; GO:0006935; GO:0048247; GO:0071346; GO:0007204; GO:0006887; GO:0043547; GO:0050918; GO:0000165; GO:0006468; GO:0032731; GO:0030593; GO:0007267; GO:0032760; GO:0010628; GO:0070374; GO:0043491; GO:0001649; GO:0002548; GO:0051930; GO:0009636; GO:0014808; GO:0006874; GO:0019722; GO:0010629; GO:…	GO:0008009; GO:0005515; GO:0016301; GO:0005125; GO:0042802; GO:0004672; GO:0004698; GO:0048020; GO:0042056; GO:0016004; GO:0031726; GO:0031730	GO:0005576; GO:0005829; GO:0005737; GO:0005615	CCL18,CCL3,CCL3L1,CCL3L3	20302	TRUE	-1.71277	0.000101703	0.00495868	chr11
ENSMUSG00000004035	ENSMUST00000004137; ENSMUST00000106687; ENSMUST00000106688; ENSMUST00000133947; ENSMUST00000124215	Gstm7	protein_coding	protein_coding	glutathione S-transferase, mu 7 [Source:MGI Symbol;Acc:MGI:1915562]	0.5301	784	GO:0098869; GO:0043651; GO:0010880; GO:0042178; GO:0071313; GO:0006749; GO:0060316; GO:0051122; GO:0060315; GO:0018916; GO:0070458	GO:0016740; GO:0004364; GO:0005102; GO:0042803; GO:0019899; GO:0004602; GO:0043295; GO:0005504; GO:0042802	GO:0005829; GO:0005737; GO:0045171; GO:0016529	GSTM2	68312	TRUE	0.345938	0.000102296	0.00497105	chr3
ENSMUSG00000022421	ENSMUST00000023057; ENSMUST00000175858; ENSMUST00000125283	Nptxr	protein_coding	protein_coding	neuronal pentraxin receptor [Source:MGI Symbol;Acc:MGI:1920590]	0.587	3651	GO:0098962		GO:0098978	NPTXR	73340	TRUE	0.58792	0.000103015	0.00498939	chr15
ENSMUSG00000029095	ENSMUST00000101280; ENSMUST00000054598; ENSMUST00000114205; ENSMUST00000114210; ENSMUST00000114206; ENSMUST00000114204; ENSMUST00000129347; ENSMUST00000130233; ENSMUST00000114203; ENSMUST00000150146; ENSMUST00000151636; ENSMUST00000135885; ENSMUST00000151322; ENSMUST00000125378; ENSMUST00000153025; ENSMUST00000130209; ENSMUST00000153529	Ablim2	protein_coding	protein_coding	actin-binding LIM protein 2 [Source:MGI Symbol;Acc:MGI:2385758]	0.5676	1742	GO:0007010; GO:0030036; GO:0006351; GO:0045944; GO:0006366; GO:0030032	GO:0003779; GO:0046872; GO:0051015	GO:0005737; GO:0110165; GO:0030016; GO:0015629	ABLIM2	231148	TRUE	-0.160687	0.00010423	0.00502365	chr5
ENSMUSG00000007207	ENSMUST00000005509; ENSMUST00000201008; ENSMUST00000150838; ENSMUST00000133812; ENSMUST00000156626; ENSMUST00000144198	Stx1a	protein_coding	protein_coding	syntaxin 1A (brain) [Source:MGI Symbol;Acc:MGI:109355]	0.5832	1374	GO:0006886; GO:0016192; GO:0061025; GO:0017157; GO:0006887; GO:0006836; GO:0006906; GO:0016079; GO:0098815; GO:0072657; GO:0045921; GO:0045956; GO:0032940; GO:0045055; GO:0048488; GO:0035493; GO:0031629; GO:0001956; GO:0009629; GO:0010701; GO:0010807; GO:0016925; GO:0017156; GO:0030073; GO:0033605; GO:0046879; GO:0048278; GO:2000463	GO:0005484; GO:0005515; GO:0044877; GO:0042802; GO:0030674; GO:0019900; GO:0000149; GO:0044325; GO:0019904; GO:0017022; GO:0047485; GO:0048306; GO:0019855; GO:0019869; GO:0032028; GO:0043008	GO:0016020; GO:0014069; GO:0016021; GO:0005886; GO:0032991; GO:0031410; GO:0045202; GO:0043005; GO:0008021; GO:0031965; GO:0008076; GO:0098793; GO:0098978; GO:0030672; GO:0030141; GO:0031201; GO:0099056; GO:0030285; GO:0012505; GO:0001669; GO:0042734; GO:0030424; GO:0048787; GO:0005887; GO:0042641; GO:0043229; GO:0070032; GO:0070033; GO:0070044	STX1A	20907	TRUE	0.410598	0.000104409	0.00502365	chr5
ENSMUSG00000033423	ENSMUST00000037127; ENSMUST00000144373; ENSMUST00000146384; ENSMUST00000125312; ENSMUST00000134453; ENSMUST00000134379	Eri3	protein_coding	protein_coding	exoribonuclease 3 [Source:MGI Symbol;Acc:MGI:2153887]	0.5259	956	GO:0000467	GO:0046872; GO:0016787; GO:0003676; GO:0004518; GO:0004527; GO:0000175	GO:0005886	ERI3	140546	TRUE	0.155723	0.000105147	0.0050312	chr4
ENSMUSG00000055027	ENSMUST00000074301; ENSMUST00000114186; ENSMUST00000114188; ENSMUST00000173730; ENSMUST00000129630; ENSMUST00000173297	Smyd1	protein_coding	protein_coding	SET and MYND domain containing 1 [Source:MGI Symbol;Acc:MGI:104790]	0.5079	1745	GO:0007507; GO:0032259; GO:0035914; GO:0034968; GO:0006338; GO:0045892; GO:0010831; GO:0045663	GO:0005515; GO:0003677; GO:0016740; GO:0046872; GO:0008168; GO:0018024; GO:0003714	GO:0005634; GO:0005737	SMYD1	12180	TRUE	-0.503427	0.000105495	0.0050312	chr6
ENSMUSG00000073424	ENSMUST00000168171; ENSMUST00000167789; ENSMUST00000163907; ENSMUST00000008801	Cyp4f15	protein_coding	protein_coding	cytochrome P450, family 4, subfamily f, polypeptide 15 [Source:MGI Symbol;Acc:MGI:2146921]	0.5104	1312	GO:0019369; GO:0006631; GO:0036101; GO:0042361; GO:0042376; GO:0042377; GO:0097267; GO:1905344	GO:0004497; GO:0020037; GO:0005506; GO:0016705; GO:0046872; GO:0016491; GO:0008391; GO:0008392; GO:0018685; GO:0050051; GO:0102033; GO:0005504; GO:0016709; GO:0052869; GO:0052871; GO:0052872	GO:0005737; GO:0043231; GO:0016324	CYP4F11,CYP4F12,CYP4F2,CYP4F3,CYP4F8	106648	TRUE	0.49343	0.000105598	0.0050312	chr17
ENSMUSG00000066392	ENSMUST00000167734; ENSMUST00000110138; ENSMUST00000190626; ENSMUST00000167103; ENSMUST00000163944; ENSMUST00000190030; ENSMUST00000163134; ENSMUST00000164072; ENSMUST00000170533; ENSMUST00000057634; ENSMUST00000167887; ENSMUST00000238943; ENSMUST00000110133; ENSMUST00000110130	Nrxn3	protein_coding	protein_coding	neurexin III [Source:MGI Symbol;Acc:MGI:1096389]	0.5075	3350	GO:0035176; GO:0007155; GO:0065008; GO:0007416; GO:0030534; GO:2000300; GO:0007268; GO:0007269; GO:0071625; GO:0007612; GO:0001525	GO:0046872; GO:0005515; GO:0005246	GO:0016020; GO:0016021; GO:0032991; GO:0098982; GO:0042734	NRXN3	18191	TRUE	-0.229635	0.000108755	0.00514964	chr12
ENSMUSG00000070695	ENSMUST00000043725	Cntnap5a	protein_coding	protein_coding	contactin associated protein-like 5A [Source:MGI Symbol;Acc:MGI:3643623]	0.4142	10940	GO:0006508; GO:0007155	GO:0004190	GO:0016020; GO:0016021; GO:0005886; GO:0043005	CNTNAP5	636808	TRUE	-0.772867	0.000108788	0.00514964	chr1
ENSMUSG00000026447	ENSMUST00000153707; ENSMUST00000145153; ENSMUST00000124934; ENSMUST00000077730; ENSMUST00000239467	Pik3c2b	protein_coding	protein_coding	phosphatidylinositol-4-phosphate 3-kinase catalytic subunit type 2 beta [Source:MGI Symbol;Acc:MGI:2685045]	0.5676	3011	GO:0043491; GO:0009267; GO:0046854; GO:0048015; GO:0016477; GO:0014065; GO:0016236; GO:0036092; GO:0046834; GO:1905037; GO:0016310; GO:0006629	GO:0005515; GO:0001727; GO:0016303; GO:0035005; GO:0052742; GO:0016301; GO:0035091; GO:0016740; GO:0000166; GO:0005524	GO:0005829; GO:0005654; GO:0005886; GO:0043231; GO:0005737; GO:0016020; GO:0005942; GO:0030139	PIK3C2B	240752	TRUE	-0.351243	0.000109593	0.005171	chr1
ENSMUSG00000037103	ENSMUST00000041367; ENSMUST00000210279; ENSMUST00000210625	Dcaf15	protein_coding	protein_coding	DDB1 and CUL4 associated factor 15 [Source:MGI Symbol;Acc:MGI:2684420]	0.5924	1648	GO:0016567; GO:0000209; GO:0002376; GO:0032814	GO:0046872; GO:0036094	GO:0080008	DCAF15	212123	TRUE	0.318658	0.000111496	0.00518369	chr8
ENSMUSG00000116165	ENSMUST00000089378	Pdxp	protein_coding	protein_coding	pyridoxal (pyridoxine, vitamin B6) phosphatase [Source:MGI Symbol;Acc:MGI:1919282]	0.6232	2001	GO:0006470; GO:0016311; GO:0007088; GO:0032465; GO:0071318; GO:0030836; GO:0031247; GO:0032361	GO:0046872; GO:0016787; GO:0016791; GO:0004721; GO:0005515; GO:0004722; GO:0017018; GO:0000287; GO:0042803; GO:0031072; GO:0019838; GO:0033883; GO:0043136	GO:0005829; GO:0005737; GO:0016020; GO:0005886; GO:0015629; GO:0005856; GO:0042995; GO:0030027; GO:0005911; GO:0030496; GO:0032154; GO:0032587; GO:0070938; GO:0031258	PDXP	57028	TRUE	0.183582	0.000111691	0.00518369	chr15
ENSMUSG00000044847	ENSMUST00000129820; ENSMUST00000062458	Lsm11	protein_coding	protein_coding	U7 snRNP-specific Sm-like protein LSM11 [Source:MGI Symbol;Acc:MGI:1919540]	0.5308	4290	GO:0006397; GO:1900087; GO:1902275; GO:0006398	GO:0003723; GO:0005515; GO:0071209	GO:0005634; GO:0016604; GO:0005654; GO:1990904; GO:0005697; GO:0005683; GO:0071204	LSM11	72290	TRUE	-0.272811	0.000111795	0.00518369	chr11
ENSMUSG00000022205	ENSMUST00000022816; ENSMUST00000110504; ENSMUST00000129533; ENSMUST00000134414	Sub1	protein_coding	protein_coding	SUB1 homolog, transcriptional regulator [Source:MGI Symbol;Acc:MGI:104811]	0.4307	1292	GO:0006355; GO:0060395; GO:0006357; GO:0001111; GO:0032092; GO:0032508; GO:0051053; GO:0051260; GO:0060261; GO:1905463	GO:0003677; GO:0000978; GO:0003697; GO:0042802; GO:0003713; GO:0003678; GO:0003690; GO:0140297	GO:0005634; GO:0005730; GO:0005654; GO:0005667	SUB1	20024	TRUE	0.204714	0.000111907	0.00518369	chr15
ENSMUSG00000056234	ENSMUST00000163336; ENSMUST00000228143; ENSMUST00000169722; ENSMUST00000168385; ENSMUST00000168334; ENSMUST00000111994; ENSMUST00000168114; ENSMUST00000168034; ENSMUST00000164341; ENSMUST00000226479; ENSMUST00000227498; ENSMUST00000227112; ENSMUST00000228779	Ncoa4	protein_coding	protein_coding	nuclear receptor coactivator 4 [Source:MGI Symbol;Acc:MGI:1350932]	0.4645	1617	GO:0045893; GO:0006879; GO:0006622; GO:0009725	GO:0003674; GO:0003713	GO:0005739; GO:0044754	NCOA4	27057	TRUE	-0.131074	0.00011209	0.00518369	chr14
ENSMUSG00000039385	ENSMUST00000036439; ENSMUST00000226917	Cdh6	protein_coding	protein_coding	cadherin 6 [Source:MGI Symbol;Acc:MGI:107435]	0.4443	4981	GO:0007156; GO:0007155; GO:0098609; GO:0000902; GO:0098742; GO:0007043; GO:0016339; GO:0034332; GO:0007219	GO:0005509; GO:0046872; GO:0045296	GO:0016020; GO:0005886; GO:0005654; GO:0016021; GO:0030054; GO:0005912; GO:0016342	CDH6	12563	TRUE	-0.380828	0.000112109	0.00518369	chr15
ENSMUSG00000029482	ENSMUST00000031445; ENSMUST00000144361; ENSMUST00000131355; ENSMUST00000199978; ENSMUST00000196556; ENSMUST00000200286	Aacs	protein_coding	protein_coding	acetoacetyl-CoA synthetase [Source:MGI Symbol;Acc:MGI:1926144]	0.5768	854	GO:0071333; GO:0006629; GO:0044238; GO:0071704; GO:0009410; GO:0006631; GO:0007584; GO:0044281; GO:0045471; GO:0014070; GO:0001889; GO:0032024; GO:0010243; GO:0034201	GO:0000166; GO:0005524; GO:0016874; GO:0047760; GO:0030729	GO:0005829; GO:0005737	AACS	78894	TRUE	0.292562	0.000112381	0.00518369	chr5
ENSMUSG00000061046	ENSMUST00000140738; ENSMUST00000133071; ENSMUST00000077938; ENSMUST00000129917; ENSMUST00000137587; ENSMUST00000138759; ENSMUST00000150324; ENSMUST00000148986; ENSMUST00000143248; ENSMUST00000138100; ENSMUST00000145053	Haghl	protein_coding	protein_coding	hydroxyacylglutathione hydrolase-like [Source:MGI Symbol;Acc:MGI:1919877]	0.5824	1138	GO:0019243; GO:0008150	GO:0004416; GO:0003674; GO:0046872; GO:0016787	GO:0005575	HAGHL	68977	TRUE	0.305131	0.000112767	0.00518369	chr17
ENSMUSG00000043668	ENSMUST00000109621; ENSMUST00000176616; ENSMUST00000176034	Tox3	protein_coding	protein_coding	TOX high mobility group box family member 3 [Source:MGI Symbol;Acc:MGI:3039593]	0.5714	1727	GO:0045944; GO:0043524; GO:0042981; GO:0006357; GO:0045893; GO:0006915; GO:0019722	GO:0003682; GO:0003677; GO:0005515; GO:0042803; GO:0003713; GO:0031490; GO:0051219	GO:0005829; GO:0005654; GO:0005634	TOX3	244579	TRUE	0.370356	0.000113051	0.00518369	chr8
ENSMUSG00000029917	ENSMUST00000133352; ENSMUST00000170608; ENSMUST00000136016	Qrfprl	protein_coding	protein_coding	pyroglutamylated RFamide peptide receptor like [Source:MGI Symbol;Acc:MGI:2441881]	0.504	1325	GO:0007186; GO:0007165; GO:0007218	GO:0004930; GO:0004983	GO:0016021; GO:0016020; GO:0005887	QRFPR	243407	TRUE	-1.20832	0.000114445	0.00521398	chr6
ENSMUSG00000006517	ENSMUST00000211883; ENSMUST00000006692	Mvd	protein_coding	protein_coding	mevalonate (diphospho) decarboxylase [Source:MGI Symbol;Acc:MGI:2179327]	0.5916	1794	GO:0008284; GO:0006629; GO:0008202; GO:0008203; GO:0006694; GO:0006695; GO:0016126; GO:0008299; GO:0019287	GO:0005524; GO:0000166; GO:0016829; GO:0042803; GO:0016831; GO:0030544; GO:0004163	GO:0005829; GO:0005737; GO:0005777; GO:0005782	MVD	192156	TRUE	0.298207	0.000114829	0.00521398	chr8
ENSMUSG00000027215	ENSMUST00000099696; ENSMUST00000028644; ENSMUST00000116457; ENSMUST00000126772; ENSMUST00000111257; ENSMUST00000123565; ENSMUST00000145553; ENSMUST00000150508; ENSMUST00000111256; ENSMUST00000144168; ENSMUST00000124804	Cd82	protein_coding	protein_coding	CD82 antigen [Source:MGI Symbol;Acc:MGI:104651]	0.5535	948			GO:0016021; GO:0016020; GO:0005886; GO:0005887	CD82	12521	TRUE	-0.297711	0.000115387	0.00521398	chr2
ENSMUSG00000025384	ENSMUST00000135635; ENSMUST00000026448; ENSMUST00000129203; ENSMUST00000134771; ENSMUST00000154826; ENSMUST00000148520; ENSMUST00000153015; ENSMUST00000152346	Faap100	protein_coding	protein_coding	Fanconi anemia core complex associated protein 100 [Source:MGI Symbol;Acc:MGI:1919135]	0.6115	1778	GO:0036297; GO:0006281; GO:0006974; GO:0006513	GO:0003674; GO:0003677	GO:0043240; GO:0005829; GO:0000785; GO:0005654; GO:0005634	FAAP100	71885	TRUE	0.263285	0.000115804	0.00521398	chr11
ENSMUSG00000043004	ENSMUST00000160013; ENSMUST00000055100; ENSMUST00000159073; ENSMUST00000159028; ENSMUST00000162425; ENSMUST00000161247	Gng2	protein_coding	protein_coding	guanine nucleotide binding protein (G protein), gamma 2 [Source:MGI Symbol;Acc:MGI:102705]	0.5289	1105	GO:0007186; GO:0007165; GO:0048144	GO:0031681; GO:0003924	GO:0016020; GO:0005886; GO:0005834	GNG2	14702	TRUE	0.153998	0.000116464	0.00521398	chr14
ENSMUSG00000013611	ENSMUST00000013755; ENSMUST00000161202; ENSMUST00000162888; ENSMUST00000160936	Snx31	protein_coding	protein_coding	sorting nexin 31 [Source:MGI Symbol;Acc:MGI:1913946]	0.4914	1452	GO:0015031; GO:0006886	GO:0035091	GO:0032991; GO:0005769	SNX31	66696	TRUE	0.827731	0.000116564	0.00521398	chr15
ENSMUSG00000043298	ENSMUST00000068293; ENSMUST00000203468; ENSMUST00000111894	Smco3	protein_coding	protein_coding	single-pass membrane protein with coiled-coil domains 3 [Source:MGI Symbol;Acc:MGI:2443451]	0.4514	1639	GO:0008150	GO:0003674	GO:0005575; GO:0016020; GO:0016021	SMCO3	654818	TRUE	-0.378607	0.00011658	0.00521398	chr6
ENSMUSG00000041734	ENSMUST00000159976; ENSMUST00000107618; ENSMUST00000041732	Kirrel	protein_coding	protein_coding	kirre like nephrin family adhesion molecule 1 [Source:MGI Symbol;Acc:MGI:1891396]	0.5386	5558	GO:0001933; GO:0098609; GO:0045217; GO:0003094; GO:0030838; GO:0097017	GO:0005515; GO:0050839; GO:0017022	GO:0016020; GO:0016021; GO:0005886; GO:0048471; GO:0005887; GO:0005911; GO:0043198; GO:0045121; GO:0031253	KIRREL1	170643	TRUE	-0.552279	0.000116803	0.00521398	chr3
ENSMUSG00000033088	ENSMUST00000140228; ENSMUST00000109689; ENSMUST00000109690; ENSMUST00000229943; ENSMUST00000137934; ENSMUST00000229270; ENSMUST00000109687; ENSMUST00000130663; ENSMUST00000109688; ENSMUST00000144151; ENSMUST00000229535; ENSMUST00000129922	Triobp	protein_coding	protein_coding	TRIO and F-actin binding protein [Source:MGI Symbol;Acc:MGI:1349410]	0.5793	2670	GO:0007605; GO:0007049; GO:0051301; GO:0007015; GO:0060088; GO:1900026	GO:0005515; GO:0003779; GO:0051015; GO:0031625	GO:0005634; GO:0005737; GO:0005815; GO:0005856; GO:0030496; GO:0015629; GO:0005829; GO:0120044	TRIOBP	110253	TRUE	0.324756	0.00011692	0.00521398	chr15
ENSMUSG00000032724	ENSMUST00000076212; ENSMUST00000138580; ENSMUST00000131122	Abtb2	protein_coding	protein_coding	ankyrin repeat and BTB (POZ) domain containing 2 [Source:MGI Symbol;Acc:MGI:2139365]	0.5434	2714	GO:0097237	GO:0005515; GO:0046982		ABTB2	99382	TRUE	-0.242158	0.000117719	0.00523365	chr2
ENSMUSG00000052684	ENSMUST00000107094	Jun	protein_coding	protein_coding	jun proto-oncogene [Source:MGI Symbol;Acc:MGI:96646]	0.5553	3189	GO:0006355; GO:0043066; GO:0060395; GO:0045944; GO:0048146; GO:0008284; GO:0006915; GO:0043524; GO:0000122; GO:0007179; GO:0051726; GO:0006357; GO:0008285; GO:0001525; GO:0008283; GO:0006366; GO:0001774; GO:0050790; GO:0043525; GO:0006351; GO:0045893; GO:0007265; GO:0009410; GO:0051899; GO:0043392; GO:0045892; GO:0070374; GO:0034614; GO:0071276; GO:0071277; GO:0043065; GO:0043922; GO:0043923; GO:…	GO:0003700; GO:0043565; GO:0005515; GO:0044877; GO:0000978; GO:0003682; GO:0000976; GO:0003677; GO:0000981; GO:0001228; GO:0042802; GO:1990837; GO:0003690; GO:0001227; GO:0005096; GO:0061629; GO:0019899; GO:0031625; GO:0070412; GO:0140296; GO:0071837; GO:0035497; GO:0044389	GO:0005634; GO:0005829; GO:0000785; GO:0005654; GO:0005886; GO:0032991; GO:0005667; GO:0000791; GO:0090575; GO:0017053; GO:0035976	JUN	16476	TRUE	0.28056	0.000118269	0.00524218	chr4
ENSMUSG00000039328	ENSMUST00000046941; ENSMUST00000162640; ENSMUST00000217278; ENSMUST00000216520; ENSMUST00000209547	Rnf122	protein_coding	protein_coding	ring finger protein 122 [Source:MGI Symbol;Acc:MGI:1916117]	0.5295	2397	GO:0043161; GO:0043065; GO:0051865; GO:0010917	GO:0046872; GO:0061630	GO:0016020; GO:0016021; GO:0005737; GO:0005794; GO:0005783; GO:0012505	RNF122	68867	TRUE	-0.355157	0.000121717	0.00537869	chr8
ENSMUSG00000026750	ENSMUST00000028083; ENSMUST00000151981	Psmb7	protein_coding	protein_coding	proteasome (prosome, macropain) subunit, beta type 7 [Source:MGI Symbol;Acc:MGI:107637]	0.4475	2004	GO:0051603; GO:0006508; GO:0010498	GO:0016787; GO:0008233; GO:0004298; GO:0004175	GO:0005839; GO:0005634; GO:0005829; GO:0005737; GO:0016604; GO:0005654; GO:0000502; GO:0019774	PSMB7	19177	TRUE	0.151412	0.000123262	0.00542265	chr2
ENSMUSG00000027562	ENSMUST00000192609; ENSMUST00000029078; ENSMUST00000195520	Car2	protein_coding	protein_coding	carbonic anhydrase 2 [Source:MGI Symbol;Acc:MGI:88269]	0.5149	1085	GO:0051453; GO:0070050; GO:0006885; GO:0045672; GO:0045780; GO:0002009; GO:0032230; GO:0044070; GO:0006730; GO:0015670; GO:0032849; GO:0038166; GO:0046903; GO:2001150; GO:2001225	GO:0008270; GO:0004089; GO:0046872; GO:0005515; GO:0016829; GO:0016836; GO:0004064	GO:0005829; GO:0005737; GO:0030424; GO:0016020; GO:0005886; GO:0005615; GO:0045177; GO:0016323; GO:0005902; GO:0043209	CA2	12349	TRUE	-0.217253	0.000123538	0.00542265	chr3
ENSMUSG00000037851	ENSMUST00000165316; ENSMUST00000047363; ENSMUST00000172254; ENSMUST00000164260; ENSMUST00000171510; ENSMUST00000165063; ENSMUST00000164275; ENSMUST00000165270; ENSMUST00000165656	Iars	protein_coding	protein_coding	isoleucine-tRNA synthetase [Source:MGI Symbol;Acc:MGI:2145219]	0.4989	1810	GO:0006418; GO:0006412; GO:0106074; GO:0006428	GO:0005524; GO:0000166; GO:0004812; GO:0004822; GO:0016874; GO:0002161; GO:0000049; GO:0051020	GO:0005829; GO:0005737; GO:0005654; GO:0017101	IARS1	105148	TRUE	-0.155314	0.000123823	0.00542265	chr13
ENSMUSG00000020363	ENSMUST00000130129; ENSMUST00000020629	Gfpt2	protein_coding	protein_coding	glutamine fructose-6-phosphate transaminase 2 [Source:MGI Symbol;Acc:MGI:1338883]	0.4583	2906	GO:1901135; GO:1990830; GO:0006048; GO:0006487; GO:0006541; GO:0006002; GO:0006047; GO:1901137	GO:0097367; GO:0016740; GO:0008483; GO:0004360		GFPT2	14584	TRUE	0.406209	0.000124318	0.00542805	chr11
ENSMUSG00000079215	ENSMUST00000111417; ENSMUST00000141533; ENSMUST00000130616; ENSMUST00000199154; ENSMUST00000134463; ENSMUST00000134473	Zfp664	protein_coding	protein_coding	zinc finger protein 664 [Source:MGI Symbol;Acc:MGI:2442505]	0.5038	2150			GO:0005634	ZNF664	269704	TRUE	-0.170819	0.00012471	0.00542897	chr5
ENSMUSG00000029560	ENSMUST00000197880; ENSMUST00000196130; ENSMUST00000031539; ENSMUST00000196566; ENSMUST00000195982; ENSMUST00000198945; ENSMUST00000196020	Snx8	protein_coding	protein_coding	sorting nexin 8 [Source:MGI Symbol;Acc:MGI:2443816]	0.5758	1626	GO:0042147; GO:0015031; GO:0006886; GO:0034498	GO:0035091; GO:0008289; GO:0042802	GO:0016020; GO:0005829; GO:0043231; GO:0031901; GO:0005768; GO:0030904	SNX8	231834	TRUE	0.224162	0.000125665	0.00545431	chr5
ENSMUSG00000036242	ENSMUST00000036972; ENSMUST00000118129; ENSMUST00000177321	Armh4	protein_coding	protein_coding	armadillo-like helical domain containing 4 [Source:MGI Symbol;Acc:MGI:1914669]	0.4269	4167	GO:0008150	GO:0003674	GO:0005575; GO:0016020; GO:0016021	ARMH4	67419	TRUE	-0.313118	0.000127481	0.00551674	chr14
ENSMUSG00000032846	ENSMUST00000225822; ENSMUST00000225197; ENSMUST00000224719	Zswim6	protein_coding	protein_coding	zinc finger SWIM-type containing 6 [Source:MGI Symbol;Acc:MGI:1914513]	0.4883	4238		GO:0008270		ZSWIM6	67263	TRUE	-0.216342	0.000128521	0.005537	chr13
ENSMUSG00000006403	ENSMUST00000111315; ENSMUST00000219033; ENSMUST00000111314	Adamts4	protein_coding	protein_coding	a disintegrin-like and metallopeptidase (reprolysin type) with thrombospondin type 1 motif, 4 [Source:MGI Symbol;Acc:MGI:1339949]	0.5494	4179	GO:0006508; GO:0042742; GO:0030198	GO:0004222; GO:0005515; GO:0046872; GO:0016787; GO:0008233; GO:0008237; GO:0002020	GO:0016607; GO:0005615; GO:0005576; GO:0031012; GO:0062023	ADAMTS4	240913	TRUE	-0.290668	0.000128706	0.005537	chr1
ENSMUSG00000074923	ENSMUST00000099557; ENSMUST00000152550; ENSMUST00000132843; ENSMUST00000110853; ENSMUST00000132577	Pak6	protein_coding	protein_coding	p21 (RAC1) activated kinase 6 [Source:MGI Symbol;Acc:MGI:2679420]	0.5875	2431	GO:0006468; GO:0007626; GO:0016310; GO:0035556; GO:0007613; GO:1990138; GO:0007612; GO:0043408; GO:0140058	GO:0005524; GO:0004672; GO:0016740; GO:0000166; GO:0016301; GO:0004674; GO:0106310	GO:0005654; GO:0005634; GO:0005737; GO:0030054; GO:0001650	BUB1B-PAK6,PAK6	214230	TRUE	0.445396	0.000137356	0.00587112	chr2
ENSMUSG00000020889	ENSMUST00000064941; ENSMUST00000139220	Nr1d1	protein_coding	protein_coding	nuclear receptor subfamily 1, group D, member 1 [Source:MGI Symbol;Acc:MGI:2444210]	0.5638	1751	GO:0006355; GO:0071222; GO:0000122; GO:0045893; GO:0030154; GO:0030522; GO:0045944; GO:0048511; GO:0005978; GO:0045892; GO:0007623; GO:0019216; GO:0001678; GO:0010498; GO:0120163; GO:0032922; GO:0043124; GO:0031648; GO:0061178; GO:0050728; GO:0042752; GO:0042753; GO:0071347; GO:0042632; GO:0060086; GO:0045598; GO:0009755; GO:0061469; GO:0071356; GO:1903979; GO:0044321; GO:0034144; GO:0042749; GO:…	GO:0008270; GO:0003700; GO:0043565; GO:0000978; GO:0000976; GO:0003677; GO:0046872; GO:0005515; GO:0000977; GO:0004879; GO:1990837; GO:0001227; GO:0020037; GO:0001222; GO:0070888	GO:0005634; GO:0005737; GO:0016604; GO:0000785; GO:0045202; GO:0042995; GO:0030425; GO:0043025; GO:0043197; GO:0005654	NR1D1	217166	TRUE	0.282172	0.000137659	0.00587112	chr11
ENSMUSG00000014198	ENSMUST00000103119; ENSMUST00000148560; ENSMUST00000151589; ENSMUST00000153494	Zfp385c	protein_coding	protein_coding	zinc finger protein 385C [Source:MGI Symbol;Acc:MGI:3608347]	0.6088	1204		GO:0008270; GO:0046872; GO:0003676	GO:0005634	ZNF385C	278304	TRUE	-0.643933	0.000137676	0.00587112	chr11
ENSMUSG00000034450	ENSMUST00000059970	Gulo	protein_coding	protein_coding	gulonolactone (L-) oxidase [Source:MGI Symbol;Acc:MGI:1353434]	0.5378	2263	GO:0019853	GO:0050660; GO:0016491; GO:0071949; GO:0003885; GO:0016899; GO:0050105	GO:0016020; GO:0016021; GO:0005783; GO:0005789; GO:0043231	GULOP	268756	TRUE	3.29534	0.000138691	0.00589721	chr14
ENSMUSG00000050556	ENSMUST00000207917; ENSMUST00000144351; ENSMUST00000148226; ENSMUST00000059826	Kcnb1	protein_coding	protein_coding	potassium voltage gated channel, Shab-related subfamily, member 1 [Source:MGI Symbol;Acc:MGI:96666]	0.5336	4545	GO:0055085; GO:0006811; GO:0006813; GO:0051260; GO:2000671; GO:0034765; GO:0071805; GO:0097623; GO:0006887; GO:0072659; GO:0071277; GO:0007215; GO:0071333; GO:0090314; GO:0001508; GO:0045956; GO:0006904; GO:0010701; GO:0033605; GO:0042593; GO:0031669; GO:1900454; GO:0046676; GO:0045163; GO:0048678; GO:0098900; GO:1902065	GO:0005249; GO:0005216; GO:0005515; GO:0005244; GO:0005267; GO:0000149; GO:0046982; GO:0044325; GO:0047485; GO:0005251; GO:0015271	GO:0016020; GO:0008076; GO:0030424; GO:0016021; GO:0005886; GO:0048471; GO:0009986; GO:0045202; GO:0045211; GO:0016328; GO:0016324; GO:0042995; GO:0030425; GO:0042383; GO:0043204; GO:0043005; GO:0005783; GO:0043025; GO:0032590; GO:0032809; GO:1990635	KCNB1	16500	TRUE	0.207862	0.000139302	0.005906	chr2
ENSMUSG00000037112	ENSMUST00000176824; ENSMUST00000176663; ENSMUST00000176491; ENSMUST00000041375; ENSMUST00000068484; ENSMUST00000177203; ENSMUST00000177346; ENSMUST00000176327	Sik2	protein_coding	protein_coding	salt inducible kinase 2 [Source:MGI Symbol;Acc:MGI:2445031]	0.5052	2864	GO:0006468; GO:0035556; GO:0046777	GO:0005524; GO:0004672; GO:0016740; GO:0000166; GO:0000287; GO:0004674		SIK2	235344	TRUE	-0.183777	0.000140784	0.00595158	chr9
ENSMUSG00000022217	ENSMUST00000174352; ENSMUST00000173169; ENSMUST00000022828; ENSMUST00000174618	Emc9	protein_coding	protein_coding	ER membrane protein complex subunit 9 [Source:MGI Symbol;Acc:MGI:1934682]	0.5317	891	GO:0071816; GO:0045050	GO:0032977	GO:0072546; GO:0005737; GO:0016020; GO:0005783; GO:0005789	EMC9	85308	TRUE	0.321909	0.000141193	0.00595165	chr14
ENSMUSG00000026620	ENSMUST00000027929; ENSMUST00000192657	Mark1	protein_coding	protein_coding	MAP/microtubule affinity regulating kinase 1 [Source:MGI Symbol;Acc:MGI:2664902]	0.4818	2574	GO:0006468; GO:0010629; GO:0010628; GO:0016310; GO:0016055; GO:0001764; GO:0000226; GO:0035556; GO:0007010; GO:0010719; GO:0010975; GO:0050773; GO:0051654	GO:0005524; GO:0004672; GO:0016740; GO:0046872; GO:0000166; GO:0016301; GO:0004674; GO:0008289; GO:0050321; GO:0000287; GO:0106310; GO:0070300; GO:0005546; GO:0001786	GO:0005737; GO:0016020; GO:0005886; GO:0005856; GO:0042995; GO:0030425	MARK1	226778	TRUE	-0.172021	0.00014226	0.00597942	chr1
ENSMUSG00000009075	ENSMUST00000009219	Cabp7	protein_coding	protein_coding	calcium binding protein 7 [Source:MGI Symbol;Acc:MGI:2183437]	0.5662	2628	GO:0008150	GO:0005509; GO:0003674; GO:0046872	GO:0005737; GO:0016020; GO:0016021; GO:0005794; GO:0005886; GO:0048471; GO:0032588	CABP7	192650	TRUE	-1.12934	0.000145923	0.00611008	chr11
ENSMUSG00000057637	ENSMUST00000105778; ENSMUST00000154280; ENSMUST00000134791; ENSMUST00000156909	Prdm2	protein_coding	protein_coding	PR domain containing 2, with ZNF domain [Source:MGI Symbol;Acc:MGI:107628]	0.5036	2210	GO:0045944; GO:0000122; GO:0006357; GO:0032259; GO:0010468; GO:0016571; GO:0008340; GO:0032355	GO:0005515; GO:0043565; GO:0016740; GO:0000977; GO:0000981; GO:0008168; GO:0001228; GO:0001227; GO:0042054	GO:0005634; GO:0005654; GO:0005794	PRDM2	110593	TRUE	-0.218645	0.000146204	0.00611008	chr4
ENSMUSG00000034009	ENSMUST00000078527; ENSMUST00000182491; ENSMUST00000183199; ENSMUST00000183040	Rxfp1	protein_coding	protein_coding	relaxin/insulin-like family peptide receptor 1 [Source:MGI Symbol;Acc:MGI:2682211]	0.4062	3409	GO:0007186; GO:0007165; GO:0007189; GO:0030198; GO:0007188; GO:0009755; GO:0007190; GO:0007567; GO:0036446; GO:0060427; GO:0060658	GO:0005515; GO:0004930; GO:0046872; GO:0042562; GO:0008528	GO:0016021; GO:0016020; GO:0005886; GO:0005887	RXFP1	381489	TRUE	0.75829	0.000147516	0.00614735	chr3
ENSMUSG00000032854	ENSMUST00000057944; ENSMUST00000198610; ENSMUST00000196481	Ugt8a	protein_coding	protein_coding	UDP galactosyltransferase 8A [Source:MGI Symbol;Acc:MGI:109522]	0.4086	2932	GO:0042552; GO:0006629; GO:0006665; GO:0006682; GO:0002175; GO:0007010; GO:0030913; GO:0048812; GO:0009247	GO:0008194; GO:0016740; GO:0016757; GO:0008120; GO:0003851; GO:0008489; GO:0047263	GO:0016020; GO:0016021; GO:0005783	UGT8	22239	TRUE	-0.305101	0.000149616	0.00621714	chr3
ENSMUSG00000047220	ENSMUST00000076592	Iho1	protein_coding	protein_coding	interactor of HORMAD1 1 [Source:MGI Symbol;Acc:MGI:3612242]	0.4709	2890	GO:0006310; GO:0042138; GO:0051321; GO:0007283; GO:0030154; GO:0048477; GO:0007129; GO:0060629	GO:0005515	GO:0005694; GO:0000794	IHO1	434438	TRUE	1.08774	0.00015027	0.00622662	chr9
ENSMUSG00000022893	ENSMUST00000023610; ENSMUST00000125897; ENSMUST00000138474	Adamts1	protein_coding	protein_coding	a disintegrin-like and metallopeptidase (reprolysin type) with thrombospondin type 1 motif, 1 [Source:MGI Symbol;Acc:MGI:109249]	0.506	2653	GO:0006508; GO:0010976; GO:0016525; GO:0001822; GO:0030198; GO:1900087; GO:1904754; GO:1904707; GO:0001542; GO:0060347	GO:0004222; GO:0005515; GO:0008270; GO:0046872; GO:0016787; GO:0008201; GO:0008233; GO:0008237	GO:0005576; GO:0031012; GO:0031410; GO:0005604; GO:0062023	ADAMTS1	11504	TRUE	-0.306487	0.000151851	0.00627435	chr16
ENSMUSG00000038248	ENSMUST00000040275; ENSMUST00000189987	Sobp	protein_coding	protein_coding	sine oculis binding protein [Source:MGI Symbol;Acc:MGI:1924427]	0.6033	3038	GO:0007605; GO:0007626; GO:0042472; GO:0048513; GO:0050890; GO:0090102	GO:0046872; GO:0032184	GO:0005634	SOBP	109205	TRUE	0.145241	0.000154178	0.00633651	chr10
ENSMUSG00000041324	ENSMUST00000042603; ENSMUST00000164993	Inhba	protein_coding	protein_coding	inhibin beta-A [Source:MGI Symbol;Acc:MGI:96570]	0.4702	3960	GO:0010628; GO:0045944; GO:0006357; GO:0042476; GO:0008285; GO:2000134; GO:0006366; GO:0001942; GO:0045893; GO:0001934; GO:0009410; GO:0060021; GO:0070374; GO:0001541; GO:0002244; GO:0071397; GO:0008584; GO:0030308; GO:0032967; GO:0045648; GO:0071372; GO:0010862; GO:0060395; GO:0097154; GO:0001707; GO:2001241; GO:0097191; GO:0048333; GO:0051247; GO:0042541; GO:0035987; GO:0032924; GO:0051799; GO:…	GO:0008083; GO:0044877; GO:0005125; GO:0005102; GO:0042802; GO:0005179; GO:0017046; GO:0070699	GO:0005576; GO:0005615; GO:0048471; GO:0043512; GO:0043509	INHBA	16323	TRUE	-1.52153	0.000154221	0.00633651	chr13
ENSMUSG00000054720	ENSMUST00000067924; ENSMUST00000150981; ENSMUST00000153955; ENSMUST00000153754	Lrrc8c	protein_coding	protein_coding	leucine rich repeat containing 8 family, member C [Source:MGI Symbol;Acc:MGI:2140839]	0.5027	2197	GO:0006811; GO:0015698; GO:0098656; GO:0071470; GO:0034214; GO:0045444; GO:0015734; GO:0015810; GO:0140361	GO:0005515; GO:0005225	GO:0005737; GO:0016020; GO:0016021; GO:0005886; GO:0005783; GO:0005789; GO:0005887; GO:0034702	LRRC8C	100604	TRUE	-0.331985	0.000156429	0.00640922	chr5
ENSMUSG00000037625	ENSMUST00000046174	Cldn11	protein_coding	protein_coding	claudin 11 [Source:MGI Symbol;Acc:MGI:106925]	0.5086	1870	GO:0007283; GO:0007155; GO:0070830; GO:0016338; GO:0008366; GO:0120192	GO:0005515; GO:0005198; GO:0042802	GO:0016021; GO:0030424; GO:0016020; GO:0005886; GO:0070161; GO:0030054; GO:0005887; GO:0005923; GO:0005811; GO:0043209; GO:0070160; GO:0005883; GO:0045178	CLDN11	18417	TRUE	-0.228179	0.000157049	0.00641663	chr3
ENSMUSG00000048578	ENSMUST00000112121; ENSMUST00000124678	Mlec	protein_coding	protein_coding	malectin [Source:MGI Symbol;Acc:MGI:1924015]	0.5211	3230	GO:0005975; GO:0006487	GO:0030246; GO:0019899	GO:0016020; GO:0016021; GO:0005783; GO:0005789; GO:0008250	MLEC	109154	TRUE	-0.194488	0.000158078	0.00644067	chr5
ENSMUSG00000071076	ENSMUST00000095267	Jund	protein_coding	protein_coding	jun D proto-oncogene [Source:MGI Symbol;Acc:MGI:96648]	0.6719	1667	GO:0006355; GO:0045944; GO:0000122; GO:0045669; GO:0006366; GO:0006357; GO:0043032; GO:0071277; GO:0042127; GO:0051726; GO:0002076; GO:0007568; GO:0007623; GO:0009416; GO:0009612; GO:0014070; GO:0032496; GO:0043434; GO:0071456	GO:0003700; GO:0043565; GO:0005515; GO:0000976; GO:0003677; GO:0000978; GO:0000981; GO:0001228; GO:1990837; GO:0003690; GO:0019899; GO:0016922; GO:0001221	GO:0005634; GO:0005654; GO:0032991; GO:0005667; GO:0032993; GO:0090575; GO:0017053; GO:0035976	JUND	16478	TRUE	0.267166	0.000159892	0.00649651	chr8
ENSMUSG00000047786	ENSMUST00000115576; ENSMUST00000140134	Lix1	protein_coding	protein_coding	limb and CNS expressed 1 [Source:MGI Symbol;Acc:MGI:1913893]	0.414	2897	GO:0097352	GO:0003674	GO:0005737	LIX1	66643	TRUE	-0.48693	0.00016324	0.00661414	chr17
ENSMUSG00000021474	ENSMUST00000021930; ENSMUST00000223504; ENSMUST00000222285	Sfxn1	protein_coding	protein_coding	sideroflexin 1 [Source:MGI Symbol;Acc:MGI:2137677]	0.455	3409	GO:0055085; GO:0006811; GO:0030218; GO:0006865; GO:0006730; GO:1990542; GO:0015808; GO:0015825; GO:0006826; GO:0140300	GO:0015075; GO:0022857; GO:0015180; GO:0015194; GO:0022889	GO:0016020; GO:0005739; GO:0016021; GO:0005743; GO:0031305	SFXN1	14057	TRUE	0.169285	0.000168213	0.00679682	chr13
ENSMUSG00000025142	ENSMUST00000169964; ENSMUST00000026135; ENSMUST00000171700; ENSMUST00000106158; ENSMUST00000168097; ENSMUST00000103016; ENSMUST00000168714; ENSMUST00000143844; ENSMUST00000135346; ENSMUST00000127269; ENSMUST00000131727; ENSMUST00000149389; ENSMUST00000153346; ENSMUST00000106160; ENSMUST00000106159; ENSMUST00000129644; ENSMUST00000151160; ENSMUST00000168510; ENSMUST00000166838; ENSMUST00000167678;…	Aspscr1	protein_coding	protein_coding	alveolar soft part sarcoma chromosome region, candidate 1 (human) [Source:MGI Symbol;Acc:MGI:1916188]	0.5866	878	GO:0042593; GO:0046324; GO:0006886; GO:0031401	GO:0005515	GO:0005829; GO:0005654; GO:0005634; GO:0005737; GO:0016020; GO:0005886; GO:0048471; GO:0043231; GO:0012505; GO:0033116; GO:0019898; GO:0012506; GO:0009898; GO:0030659	ASPSCR1	68938	TRUE	0.229723	0.000170324	0.00683532	chr11
ENSMUSG00000031343	ENSMUST00000055966; ENSMUST00000114554; ENSMUST00000137517	Gabra3	protein_coding	protein_coding	gamma-aminobutyric acid (GABA) A receptor, subunit alpha 3 [Source:MGI Symbol;Acc:MGI:95615]	0.4436	2014	GO:0006811; GO:0034220; GO:0060079; GO:0006821; GO:0007214; GO:0007165; GO:0007268; GO:0042391; GO:0050877; GO:1902476; GO:0051932; GO:0060078	GO:0005230; GO:0004888; GO:0005216; GO:0004890; GO:0005254; GO:0005231; GO:0030594; GO:1904315; GO:0008503; GO:0005237; GO:0022851	GO:0016021; GO:0045202; GO:0016020; GO:0005886; GO:0005887; GO:0045211; GO:0034707; GO:0043005; GO:0099060; GO:0098982; GO:0032590; GO:0098794; GO:1902711; GO:0070161	GABRA3	14396	TRUE	0.29864	0.000170758	0.00683532	chrX
ENSMUSG00000045962	ENSMUST00000159903; ENSMUST00000060043; ENSMUST00000177761; ENSMUST00000088644; ENSMUST00000088646; ENSMUST00000203030; ENSMUST00000160493; ENSMUST00000161243; ENSMUST00000162190; ENSMUST00000160872; ENSMUST00000203335; ENSMUST00000162541; ENSMUST00000161802; ENSMUST00000160820; ENSMUST00000204207; ENSMUST00000161185; ENSMUST00000162368; ENSMUST00000159785; ENSMUST00000161048; ENSMUST00000160769;…	Wnk1	protein_coding	protein_coding	WNK lysine deficient protein kinase 1 [Source:MGI Symbol;Acc:MGI:2442092]	0.4543	3186	GO:0006468; GO:0008217; GO:0006811; GO:0016310; GO:0035556; GO:0002028; GO:0007165; GO:0071277; GO:0050801; GO:0032147; GO:0035725; GO:0090263; GO:0018107; GO:0046777; GO:0003084; GO:0055075; GO:0034260; GO:0010820; GO:0034115; GO:0033673; GO:0030644; GO:1903038; GO:1990869; GO:1904062; GO:0010766; GO:0097022; GO:0018105; GO:1902305; GO:0033633; GO:0038116; GO:0050852; GO:0055080; GO:0090188; GO:…	GO:0005524; GO:0004672; GO:0004674; GO:0005515; GO:0016740; GO:0000166; GO:0016301; GO:0106310; GO:0019901; GO:0019902; GO:0000287; GO:0004860; GO:0019869; GO:0030291; GO:0030295; GO:0019870	GO:0005829; GO:0005737; GO:0032991; GO:0016020	WNK1	232341	TRUE	-0.175618	0.000170881	0.00683532	chr6
ENSMUSG00000005763	ENSMUST00000161971; ENSMUST00000187313; ENSMUST00000178336; ENSMUST00000005907; ENSMUST00000027849; ENSMUST00000086002; ENSMUST00000161559; ENSMUST00000159070; ENSMUST00000162411	Cd247	protein_coding	protein_coding	CD247 antigen [Source:MGI Symbol;Acc:MGI:88334]	0.4879	1754	GO:0007166; GO:0002376; GO:0002250; GO:0050852; GO:0065003; GO:2000010; GO:0038094	GO:0004888; GO:0005515; GO:0042802; GO:0042803; GO:0046982; GO:1990782	GO:0016020; GO:0016021; GO:0005886; GO:0098797; GO:0005737; GO:0042105; GO:0033001; GO:0005794; GO:0042101	CD247	12503	TRUE	1.43225	0.000171035	0.00683532	chr1
ENSMUSG00000025081	ENSMUST00000111606; ENSMUST00000078723; ENSMUST00000121249; ENSMUST00000111604	Tdrd1	protein_coding	protein_coding	tudor domain containing 1 [Source:MGI Symbol;Acc:MGI:1933218]	0.4829	5009	GO:0051321; GO:0007283; GO:0030154; GO:0031047; GO:0043046; GO:0007281; GO:0034587; GO:0030719	GO:0005515; GO:0046872	GO:1990904; GO:0005737; GO:0005829; GO:0033391; GO:0043186; GO:0071546	TDRD1	83561	TRUE	0.827456	0.00017293	0.00687436	chr19
ENSMUSG00000044864	ENSMUST00000120875; ENSMUST00000156038; ENSMUST00000094300; ENSMUST00000127837	Ankrd50	protein_coding	protein_coding	ankyrin repeat domain 50 [Source:MGI Symbol;Acc:MGI:2139777]	0.5112	3596	GO:0032456	GO:0003674; GO:0005515		ANKRD50	99696	TRUE	-0.185798	0.000172952	0.00687436	chr3
ENSMUSG00000000708	ENSMUST00000163648; ENSMUST00000000724; ENSMUST00000164390; ENSMUST00000166525; ENSMUST00000167092; ENSMUST00000172160; ENSMUST00000171072	Kat2b	protein_coding	protein_coding	K(lysine) acetyltransferase 2B [Source:MGI Symbol;Acc:MGI:1343094]	0.4459	1056	GO:0006355; GO:0045944; GO:0010976; GO:0008285; GO:0006354; GO:0016573; GO:0007049; GO:0045893; GO:0048511; GO:0006338; GO:0006282; GO:0006094; GO:0043966; GO:0007507; GO:0043484; GO:0006357; GO:0006473; GO:0010835; GO:0018076; GO:0018393; GO:0018394; GO:0032869; GO:0046600; GO:1902425; GO:2000233; GO:0042311; GO:0035563; GO:0045722; GO:0060173; GO:0071442; GO:2000617; GO:0043970; GO:0031063; GO:…	GO:0005515; GO:0016407; GO:0004402; GO:0003682; GO:0016740; GO:0016746; GO:0000977; GO:0003712; GO:0042826; GO:0140297; GO:0003713; GO:0019901; GO:0004145; GO:0004468; GO:0061733; GO:0035035; GO:0004861; GO:0010484	GO:0005634; GO:0005829; GO:0000785; GO:0005654; GO:0005737; GO:0032991; GO:0005815; GO:0005856; GO:0005813; GO:0031672; GO:0031674; GO:0000124; GO:0000123; GO:0140672; GO:0000776; GO:0042641; GO:0072686	KAT2B	18519	TRUE	-0.272505	0.000175367	0.00695148	chr17
ENSMUSG00000049630	ENSMUST00000061545	C1ql3	protein_coding	protein_coding	C1q-like 3 [Source:MGI Symbol;Acc:MGI:2387350]	0.531	2535	GO:0050807	GO:0005515; GO:0042802	GO:0005615; GO:0005576; GO:0005581	C1QL3	227580	TRUE	0.77227	0.000175906	0.00695399	chr2
ENSMUSG00000029178	ENSMUST00000165536; ENSMUST00000200587; ENSMUST00000200677; ENSMUST00000166409; ENSMUST00000197869; ENSMUST00000197879; ENSMUST00000196764; ENSMUST00000200384; ENSMUST00000198946	Klf3	protein_coding	protein_coding	Kruppel-like factor 3 (basic) [Source:MGI Symbol;Acc:MGI:1342773]	0.5161	1880	GO:0006357; GO:0000122; GO:1901653	GO:0003677; GO:0046872; GO:0000978; GO:0000981; GO:1990837; GO:0001227; GO:0000977	GO:0005654; GO:0005634	KLF3	16599	TRUE	-0.214322	0.000178683	0.00701687	chr5
ENSMUSG00000030314	ENSMUST00000032457; ENSMUST00000169310; ENSMUST00000183127; ENSMUST00000182169; ENSMUST00000183165; ENSMUST00000182098; ENSMUST00000182793; ENSMUST00000182902; ENSMUST00000182428; ENSMUST00000182035; ENSMUST00000182510; ENSMUST00000182034; ENSMUST00000182771; ENSMUST00000203130; ENSMUST00000204593; ENSMUST00000182860; ENSMUST00000182934	Atg7	protein_coding	protein_coding	autophagy related 7 [Source:MGI Symbol;Acc:MGI:1921494]	0.5328	1468	GO:0043066; GO:0007005; GO:0009791; GO:0006915; GO:0055013; GO:0009267; GO:0006914; GO:0015031; GO:0051649; GO:0048511; GO:0051607; GO:0060548; GO:0045732; GO:0010667; GO:0030163; GO:0000045; GO:0010508; GO:0000422; GO:0043065; GO:0034614; GO:0016236; GO:0031175; GO:1903204; GO:0007628; GO:0030148; GO:0001889; GO:0021987; GO:0042594; GO:0097050; GO:0050877; GO:0032446; GO:0050765; GO:0006497; GO:…	GO:0005515; GO:0008641; GO:0042803; GO:0019778; GO:0019779	GO:0005737; GO:0030424; GO:0048471; GO:0005930; GO:0000407; GO:0005829	ATG7	74244	TRUE	0.204457	0.000179421	0.00701687	chr6
ENSMUSG00000030337	ENSMUST00000032487; ENSMUST00000100942; ENSMUST00000063588; ENSMUST00000205223; ENSMUST00000160523; ENSMUST00000159547	Vamp1	protein_coding	protein_coding	vesicle-associated membrane protein 1 [Source:MGI Symbol;Acc:MGI:1313276]	0.5122	2443	GO:0016192; GO:0006906; GO:0016082; GO:0035493; GO:0031630	GO:0005484; GO:0019905	GO:0016021; GO:0005739; GO:0016020; GO:0005886; GO:0110165; GO:0031410; GO:0045202; GO:0030659; GO:0043005; GO:0098978; GO:0030672; GO:0031201; GO:0009986; GO:0098793; GO:0030285; GO:0031594; GO:0070821; GO:0035579	VAMP1	22317	TRUE	-0.35611	0.000179479	0.00701687	chr6
ENSMUSG00000023015	ENSMUST00000171702; ENSMUST00000023756; ENSMUST00000165745; ENSMUST00000169700; ENSMUST00000170369; ENSMUST00000168065; ENSMUST00000171017; ENSMUST00000169810; ENSMUST00000168976; ENSMUST00000165730; ENSMUST00000164983; ENSMUST00000168834; ENSMUST00000171908; ENSMUST00000109581	Racgap1	protein_coding	protein_coding	Rac GTPase-activating protein 1 [Source:MGI Symbol;Acc:MGI:1349423]	0.5142	1322	GO:0007165; GO:0006811; GO:0050790; GO:0007283; GO:0030154; GO:0007049; GO:0051301; GO:0032467; GO:0007405; GO:0000281; GO:0051256; GO:0045995; GO:0051988; GO:0007266; GO:0008272; GO:0000915	GO:0046872; GO:0008289; GO:0005096; GO:0019901; GO:0008017; GO:0005547; GO:0043015; GO:0043014; GO:0048487	GO:0005634; GO:0005654; GO:0005737; GO:0016020; GO:0005886; GO:0031410; GO:0005856; GO:0005819; GO:0030496; GO:0032154; GO:0072686; GO:0090543; GO:0001669; GO:0031234; GO:0097149; GO:0051233	RACGAP1	26934	TRUE	0.322776	0.000179836	0.00701687	chr15
ENSMUSG00000028670	ENSMUST00000105852; ENSMUST00000067567; ENSMUST00000156948; ENSMUST00000145350; ENSMUST00000150978	Lypla2	protein_coding	protein_coding	lysophospholipase 2 [Source:MGI Symbol;Acc:MGI:1347000]	0.6075	1133	GO:0006629; GO:0006631; GO:0046464; GO:0002084; GO:1905344	GO:0016787; GO:0004622; GO:0008474; GO:0052689	GO:0005737; GO:0005795	LYPLA2	26394	TRUE	0.177799	0.000180371	0.00701687	chr4
ENSMUSG00000025867	ENSMUST00000026985	Cplx2	protein_coding	protein_coding	complexin 2 [Source:MGI Symbol;Acc:MGI:104726]	0.5371	4928	GO:0006836; GO:0007399; GO:0030154; GO:0043303; GO:0006887; GO:0016079; GO:0046928; GO:0031630; GO:0031915	GO:0019905; GO:0000149; GO:0017075; GO:0048306	GO:0045202; GO:0005634; GO:0005737; GO:0030054; GO:0005829; GO:0042995; GO:0043204; GO:0043025; GO:0098793; GO:0030425; GO:0098978; GO:0031201; GO:0098794; GO:0043195; GO:0070033; GO:0044305	CPLX2	12890	TRUE	-0.829997	0.000180375	0.00701687	chr13
ENSMUSG00000083282	ENSMUST00000119694; ENSMUST00000237755; ENSMUST00000237504; ENSMUST00000237784; ENSMUST00000237011; ENSMUST00000236406; ENSMUST00000235464; ENSMUST00000237401; ENSMUST00000235931; ENSMUST00000235264; ENSMUST00000238118; ENSMUST00000235354	Ctsf	protein_coding	protein_coding	cathepsin F [Source:MGI Symbol;Acc:MGI:1861434]	0.5543	986	GO:0006508; GO:0051603	GO:0008234; GO:0016787; GO:0008233; GO:0004197	GO:0005886; GO:0005615; GO:0043231; GO:0005783; GO:0005764	CTSF	56464	TRUE	0.209485	0.00018155	0.00704387	chr19
ENSMUSG00000043673	ENSMUST00000055673; ENSMUST00000217974; ENSMUST00000164495	Kcns3	protein_coding	protein_coding	potassium voltage-gated channel, delayed-rectifier, subfamily S, member 3 [Source:MGI Symbol;Acc:MGI:1098804]	0.4738	2526	GO:0055085; GO:0006811; GO:0051260; GO:0006813; GO:0034765; GO:0071805	GO:0005216; GO:0005244; GO:0005249; GO:0005267	GO:0016020; GO:0005829; GO:0016021; GO:0005886; GO:0005794; GO:0008076	KCNS3	238076	TRUE	-0.511198	0.000182312	0.0070542	chr12
ENSMUSG00000035311	ENSMUST00000127615; ENSMUST00000130301; ENSMUST00000151273; ENSMUST00000020251; ENSMUST00000132738; ENSMUST00000141343; ENSMUST00000155306	Gnptab	protein_coding	protein_coding	N-acetylglucosamine-1-phosphate transferase, alpha and beta subunits [Source:MGI Symbol;Acc:MGI:3643902]	0.4985	2151	GO:0051649; GO:0046835; GO:0007040; GO:0009306; GO:0033299; GO:0016256	GO:0005509; GO:0016772; GO:0016740; GO:0046872; GO:0003976	GO:0016020; GO:0016021; GO:0000139; GO:0005794; GO:0070622	GNPTAB	432486	TRUE	-0.126131	0.000183137	0.0070542	chr10
ENSMUSG00000073910	ENSMUST00000102975; ENSMUST00000155725	Mob3b	protein_coding	protein_coding	MOB kinase activator 3B [Source:MGI Symbol;Acc:MGI:2664539]	0.487	3526	GO:0007165; GO:0032147; GO:0001934; GO:0035330	GO:0046872; GO:0030295	GO:0005634; GO:0005737	MOB3B	214944	TRUE	-0.327985	0.000183264	0.0070542	chr4
ENSMUSG00000027375	ENSMUST00000028854; ENSMUST00000028853	Mal	protein_coding	protein_coding	myelin and lymphocyte protein, T cell differentiation protein [Source:MGI Symbol;Acc:MGI:892970]	0.5193	1632	GO:0042552; GO:0022010; GO:0002175; GO:0098737; GO:1902043	GO:0019911	GO:0016020; GO:0016021; GO:0000139; GO:0005794; GO:0005886; GO:0110165; GO:0016324; GO:0005783; GO:0044853; GO:0019898; GO:0045121; GO:0120003	MAL	17153	TRUE	-0.295858	0.000184161	0.00705605	chr2
ENSMUSG00000026185	ENSMUST00000027377; ENSMUST00000137339	Igfbp5	protein_coding	protein_coding	insulin-like growth factor binding protein 5 [Source:MGI Symbol;Acc:MGI:96440]	0.5034	5144	GO:0045668; GO:0017148; GO:0051897; GO:0071320; GO:0051146; GO:0042593; GO:0001558; GO:0030336; GO:1904754; GO:0071407; GO:0040008; GO:0048662; GO:1904707; GO:0060056; GO:0031069; GO:0048286; GO:0044342; GO:0014912; GO:0001649; GO:0043568; GO:0048009; GO:0043569; GO:0060416; GO:0043567; GO:0007565; GO:0007568; GO:0014070; GO:0035556; GO:0045926; GO:1901862; GO:1904205	GO:0019838; GO:0031994; GO:0005520; GO:0001968; GO:0031995	GO:0005576; GO:0005615; GO:0042567; GO:0016942	IGFBP5	16011	TRUE	0.391421	0.000184276	0.00705605	chr1
ENSMUSG00000032322	ENSMUST00000059206; ENSMUST00000138646; ENSMUST00000147360; ENSMUST00000144638; ENSMUST00000135103; ENSMUST00000142894; ENSMUST00000132800	Pstpip1	protein_coding	protein_coding	proline-serine-threonine phosphatase-interacting protein 1 [Source:MGI Symbol;Acc:MGI:1321396]	0.5633	1429		GO:0005515; GO:0042802	GO:0005829; GO:0005886	PSTPIP1	19200	TRUE	-0.795608	0.000186936	0.00713919	chr9
ENSMUSG00000010095	ENSMUST00000170157; ENSMUST00000206598; ENSMUST00000010239; ENSMUST00000205377; ENSMUST00000205463; ENSMUST00000206797; ENSMUST00000206895; ENSMUST00000206560; ENSMUST00000205538	Slc3a2	protein_coding	protein_coding	solute carrier family 3 (activators of dibasic and neutral amino acid transport), member 2 [Source:MGI Symbol;Acc:MGI:96955]	0.5529	1017	GO:0005975; GO:0006865; GO:0043330; GO:0046718; GO:1904273; GO:0015804; GO:0015820; GO:0015823; GO:0015827; GO:0098713; GO:1903801	GO:0005515; GO:0003725; GO:0015175; GO:0015180; GO:0015173; GO:0015190	GO:0005737; GO:0005654; GO:0016020; GO:0016021; GO:0005886; GO:0009986; GO:0070161; GO:0016324; GO:0045202; GO:0005764; GO:0043025; GO:0005765; GO:0042470; GO:0016323; GO:0009925; GO:0044225; GO:1990184	SLC3A2	17254	TRUE	0.22126	0.000187997	0.00714721	chr19
ENSMUSG00000021313	ENSMUST00000021750; ENSMUST00000170156; ENSMUST00000222113; ENSMUST00000222788; ENSMUST00000221527; ENSMUST00000221916; ENSMUST00000220712; ENSMUST00000221941; ENSMUST00000221890; ENSMUST00000221609; ENSMUST00000222386; ENSMUST00000220597; ENSMUST00000221018; ENSMUST00000221341	Ryr2	protein_coding	protein_coding	ryanodine receptor 2, cardiac [Source:MGI Symbol;Acc:MGI:99685]	0.4407	4179	GO:0055085; GO:0006811; GO:0070588; GO:0006874; GO:0014850; GO:0006816; GO:0065008; GO:0051649; GO:0002027; GO:0010460; GO:0051480; GO:0051481; GO:0071313; GO:0003300; GO:0051592; GO:0060048; GO:0071872; GO:0060402; GO:0014808; GO:0031000; GO:0051209; GO:0070296; GO:0001666; GO:0003143; GO:0003220; GO:0005513; GO:0010881; GO:0010882; GO:0019722; GO:0032026; GO:0034220; GO:0035584; GO:0035994; GO:…	GO:0005515; GO:0005509; GO:0005262; GO:0005216; GO:0005219; GO:0005516; GO:0042802; GO:0019899; GO:0043621; GO:0034237; GO:0015278; GO:0048763; GO:0097159; GO:0097110; GO:0019901; GO:0034236; GO:0043924	GO:0016020; GO:0016021; GO:0005737; GO:0005886; GO:0032991; GO:0005783; GO:0043005; GO:0042383; GO:0016529; GO:0005635; GO:0033017; GO:0030018; GO:0034704; GO:0005790; GO:0030659; GO:0031672; GO:0031234; GO:0030017	RYR2	20191	TRUE	-0.825255	0.000188123	0.00714721	chr13
ENSMUSG00000025475	ENSMUST00000026548; ENSMUST00000137584; ENSMUST00000129454	Adgra1	protein_coding	protein_coding	adhesion G protein-coupled receptor A1 [Source:MGI Symbol;Acc:MGI:1277167]	0.532	2196	GO:0007186; GO:0007166	GO:0004930; GO:0004888; GO:0003674	GO:0016021; GO:0016020; GO:0005886; GO:0014069; GO:0098978	ADGRA1	52389	TRUE	0.318891	0.000189079	0.00716493	chr7
ENSMUSG00000060716	ENSMUST00000039928; ENSMUST00000217954; ENSMUST00000219956; ENSMUST00000219946	Plekhh1	protein_coding	protein_coding	pleckstrin homology domain containing, family H (with MyTH4 domain) member 1 [Source:MGI Symbol;Acc:MGI:2144989]	0.5225	4051	GO:0008150	GO:0003674	GO:0005856	PLEKHH1	211945	TRUE	-0.277409	0.000195202	0.00737781	chr12
ENSMUSG00000046561	ENSMUST00000093976	Arsj	protein_coding	protein_coding	arylsulfatase J [Source:MGI Symbol;Acc:MGI:2443513]	0.4765	3859		GO:0008484; GO:0046872; GO:0016787	GO:0005576; GO:0015629	ARSJ	271970	TRUE	0.546151	0.000195743	0.00737922	chr3
ENSMUSG00000047787	ENSMUST00000113383	Flrt1	protein_coding	protein_coding	fibronectin leucine rich transmembrane protein 1 [Source:MGI Symbol;Acc:MGI:3026647]	0.5387	5872		GO:0005515	GO:0016020; GO:0016021	FLRT1	396184	TRUE	0.176176	0.00019828	0.00745354	chr19
ENSMUSG00000028890	ENSMUST00000106193; ENSMUST00000138807; ENSMUST00000030723; ENSMUST00000147452; ENSMUST00000175875	Mtf1	protein_coding	protein_coding	metal response element binding transcription factor 1 [Source:MGI Symbol;Acc:MGI:101786]	0.5058	3470	GO:0045944; GO:0006357; GO:0045893; GO:0006351; GO:0007417; GO:0006979; GO:0046686; GO:0071294; GO:1990079	GO:0000978; GO:0003677; GO:0046872; GO:0000981; GO:0003700; GO:0001228; GO:1990837; GO:0000987; GO:0035035	GO:0005634; GO:0005654; GO:0005737	MTF1	17764	TRUE	-0.163733	0.000199814	0.00745354	chr4
ENSMUSG00000059602	ENSMUST00000120638; ENSMUST00000143319; ENSMUST00000145864; ENSMUST00000121789; ENSMUST00000123783; ENSMUST00000139197	Syn3	protein_coding	protein_coding	synapsin III [Source:MGI Symbol;Acc:MGI:1351334]	0.5106	2859	GO:0007269; GO:0097091; GO:0099504	GO:0005524; GO:0000166	GO:0045202; GO:0014069; GO:0016020; GO:0031410; GO:0098978; GO:0008021; GO:0030672; GO:0098850; GO:0012505	SYN3	27204	TRUE	-0.547049	0.000200194	0.00745354	chr10
ENSMUSG00000034037	ENSMUST00000089334; ENSMUST00000113466; ENSMUST00000146743; ENSMUST00000130369	Fgd5	protein_coding	protein_coding	FYVE, RhoGEF and PH domain containing 5 [Source:MGI Symbol;Acc:MGI:2443369]	0.5303	3595	GO:0050790	GO:0005085; GO:0046872	GO:0005737; GO:0005856; GO:0005886	FGD5	232237	TRUE	0.480204	0.000200435	0.00745354	chr6
ENSMUSG00000021108	ENSMUST00000221153; ENSMUST00000021527; ENSMUST00000119092; ENSMUST00000220898	Prkch	protein_coding	protein_coding	protein kinase C, eta [Source:MGI Symbol;Acc:MGI:97600]	0.4972	3303	GO:0006468; GO:0017148; GO:0016310; GO:0030154; GO:0035556; GO:0051092; GO:0018105; GO:0034198; GO:0045618; GO:0070528; GO:0060252; GO:0071901; GO:2000810; GO:0010744; GO:0032056; GO:0034351; GO:0050861	GO:0005524; GO:0004672; GO:0004674; GO:0045182; GO:0016740; GO:0046872; GO:0000166; GO:0016301; GO:0005515; GO:0106310; GO:0031267; GO:0019899; GO:0004697; GO:0004698; GO:0004699; GO:0030291; GO:0120283	GO:0005829; GO:0005737; GO:0016020; GO:0005886; GO:0005911	PRKCH	18755	TRUE	0.417199	0.000200729	0.00745354	chr12
ENSMUSG00000050505	ENSMUST00000061628; ENSMUST00000192557	Pcdh20	protein_coding	protein_coding	protocadherin 20 [Source:MGI Symbol;Acc:MGI:2443376]	0.4516	4302	GO:0007156; GO:0007155	GO:0005509	GO:0016020; GO:0005886; GO:0016021; GO:0005887	PCDH20	219257	TRUE	-0.605793	0.000200772	0.00745354	chr14
ENSMUSG00000032085	ENSMUST00000034590; ENSMUST00000216035; ENSMUST00000215509	Tagln	protein_coding	protein_coding	transgelin [Source:MGI Symbol;Acc:MGI:106012]	0.5147	965	GO:0030855	GO:0005515; GO:0051015	GO:0005737; GO:0005856	TAGLN	21345	TRUE	-0.52242	0.000202279	0.00749046	chr9
ENSMUSG00000118401	ENSMUST00000238289	Gpr52	protein_coding	protein_coding	G protein-coupled receptor 52 [Source:MGI Symbol;Acc:MGI:3643278]	0.4337	1637	GO:0007186; GO:0007626; GO:0007165; GO:0009410; GO:0007602; GO:0009584; GO:0071482	GO:0004930; GO:0008020	GO:0016021; GO:0016020; GO:0005886; GO:0005887	GPR52	620246	TRUE	0.635912	0.000203511	0.00749193	chr1
ENSMUSG00000004748	ENSMUST00000004868; ENSMUST00000123607	Mtfp1	protein_coding	protein_coding	mitochondrial fission process 1 [Source:MGI Symbol;Acc:MGI:1916686]	0.5589	910	GO:0007005; GO:0006915; GO:0000266; GO:0007006; GO:0014850	GO:0003674	GO:0005739; GO:0016020; GO:0016021; GO:0005743	MTFP1	67900	TRUE	0.183548	0.000204058	0.00749193	chr11
ENSMUSG00000020696	ENSMUST00000074515; ENSMUST00000093975; ENSMUST00000108173; ENSMUST00000071152; ENSMUST00000021036; ENSMUST00000103218; ENSMUST00000126660	Rffl	protein_coding	protein_coding	ring finger and FYVE like domain containing protein [Source:MGI Symbol;Acc:MGI:1914588]	0.5106	2761	GO:0006511; GO:0016567; GO:0043161; GO:0070936; GO:0006915; GO:0010762; GO:0010804; GO:0006886; GO:1902042; GO:1901797; GO:2001271	GO:0016740; GO:0046872; GO:0061630; GO:0002020; GO:0002039; GO:0019901; GO:0031625	GO:0005737; GO:0016020; GO:0005886; GO:0005829; GO:0010008; GO:0005768; GO:0031410; GO:0055038	RFFL	67338	TRUE	-0.256557	0.000204284	0.00749193	chr11
ENSMUSG00000031425	ENSMUST00000033800; ENSMUST00000113085; ENSMUST00000125644; ENSMUST00000144880	Plp1	protein_coding	protein_coding	proteolipid protein (myelin) 1 [Source:MGI Symbol;Acc:MGI:97623]	0.43	2173	GO:0010628; GO:0042552; GO:0006954; GO:0031175; GO:0010001; GO:0061564; GO:0030335; GO:0022010; GO:0014002; GO:0008366; GO:0042759; GO:0098990; GO:1904427	GO:0005515; GO:0044877; GO:0042802; GO:0019911	GO:0016021; GO:0016020; GO:0005886; GO:0043209; GO:0034683	PLP1	18823	TRUE	-0.280205	0.000204367	0.00749193	chrX
ENSMUSG00000033039	ENSMUST00000229113; ENSMUST00000040320; ENSMUST00000229031; ENSMUST00000229048; ENSMUST00000229004; ENSMUST00000229694; ENSMUST00000230779; ENSMUST00000230202	Micall1	protein_coding	protein_coding	microtubule associated monooxygenase, calponin and LIM domain containing -like 1 [Source:MGI Symbol;Acc:MGI:105870]	0.5855	2390	GO:0015031; GO:0006897; GO:1990090; GO:0032456; GO:0031175; GO:0006898; GO:0036010; GO:0006612; GO:0097320; GO:0032458	GO:0005515; GO:0046872; GO:0031267; GO:0042802; GO:0070300; GO:0051015	GO:0016020; GO:0010008; GO:0005768; GO:0005770; GO:0031902; GO:0019898; GO:0055038	MICALL1	27008	TRUE	-0.168603	0.000206446	0.00754921	chr15
ENSMUSG00000015714	ENSMUST00000129267; ENSMUST00000015858; ENSMUST00000133748; ENSMUST00000154055; ENSMUST00000156850; ENSMUST00000139498; ENSMUST00000139866; ENSMUST00000134702; ENSMUST00000142398	Cers2	protein_coding	protein_coding	ceramide synthase 2 [Source:MGI Symbol;Acc:MGI:1924143]	0.5251	975	GO:0006629; GO:0006665; GO:0044209; GO:0046513; GO:0019216; GO:0030148; GO:0010626; GO:1900148; GO:0048681; GO:1905045; GO:0006189	GO:0003677; GO:0016740; GO:0050291; GO:0005515; GO:0016410	GO:0016021; GO:0005634; GO:0016020; GO:0005783; GO:0005789	CERS2	76893	TRUE	-0.231814	0.000208057	0.00758914	chr3
ENSMUSG00000028222	ENSMUST00000029876; ENSMUST00000136266; ENSMUST00000141336	Calb1	protein_coding	protein_coding	calbindin 1 [Source:MGI Symbol;Acc:MGI:88248]	0.4127	1886	GO:0007626; GO:0071310; GO:0051480; GO:0048167; GO:0055074; GO:0099566; GO:0007616; GO:0007614; GO:0007611; GO:0010842; GO:0035502; GO:0060041; GO:0072205; GO:0072221; GO:0072286; GO:0090102; GO:0099509; GO:1900271	GO:0005509; GO:0046872; GO:0008270; GO:0005499; GO:0099534; GO:0099567	GO:0005634; GO:0045202; GO:0005829; GO:0005737; GO:0030424; GO:0043005; GO:0043025; GO:0030425; GO:0098978; GO:0099524; GO:0098982; GO:0043197; GO:0098794; GO:0032437; GO:0032420; GO:0043195; GO:0098686; GO:0099523; GO:0044305	CALB1	12307	TRUE	0.245088	0.000209274	0.00761455	chr4
ENSMUSG00000002017	ENSMUST00000112507; ENSMUST00000234785; ENSMUST00000140729; ENSMUST00000235026; ENSMUST00000141969	Fam98a	protein_coding	protein_coding	family with sequence similarity 98, member A [Source:MGI Symbol;Acc:MGI:1919972]	0.4796	1505	GO:0010628; GO:0008284; GO:0006479; GO:0032418; GO:1900029	GO:0005515; GO:0008276	GO:0072669	FAM98A	72722	TRUE	-0.196705	0.000210646	0.00764547	chr17
ENSMUSG00000031839	ENSMUST00000034300; ENSMUST00000213037; ENSMUST00000212468; ENSMUST00000212795	Hsbp1	protein_coding	protein_coding	heat shock factor binding protein 1 [Source:MGI Symbol;Acc:MGI:1915446]	0.502	925	GO:0045892; GO:0006936; GO:0070370; GO:0019896; GO:0035987	GO:0003714; GO:0042802	GO:0005634; GO:0005829; GO:0005856; GO:1904115	HSBP1	68196	TRUE	0.116941	0.000212219	0.00768349	chr8
ENSMUSG00000022494	ENSMUST00000182889; ENSMUST00000232469; ENSMUST00000170672; ENSMUST00000023138; ENSMUST00000182154; ENSMUST00000229804	Shisa9	protein_coding	protein_coding	shisa family member 9 [Source:MGI Symbol;Acc:MGI:1919805]	0.5745	1832	GO:2000311; GO:0048172; GO:0098962	GO:0030165	GO:0016020; GO:0016021; GO:0005886; GO:0045202; GO:0045211; GO:0042995; GO:0014069; GO:0098978; GO:0099061; GO:0032591; GO:0032281; GO:0098839; GO:0008328	SHISA9	72555	TRUE	0.225793	0.000213935	0.00772648	chr16
ENSMUSG00000040713	ENSMUST00000111432; ENSMUST00000140769; ENSMUST00000040298	Creg1	protein_coding	protein_coding	cellular repressor of E1A-stimulated genes 1 [Source:MGI Symbol;Acc:MGI:1344382]	0.4867	1635	GO:0006355		GO:0005615; GO:0005576; GO:0005667	CREG1	433375	TRUE	0.38407	0.000215158	0.00775154	chr1
ENSMUSG00000058886	ENSMUST00000080553; ENSMUST00000209600; ENSMUST00000210062; ENSMUST00000211146; ENSMUST00000211537; ENSMUST00000210830; ENSMUST00000210816; ENSMUST00000209397; ENSMUST00000209608	Deaf1	protein_coding	protein_coding	DEAF1, transcription factor [Source:MGI Symbol;Acc:MGI:1858496]	0.5629	1389	GO:0045944; GO:0000122; GO:0006357; GO:0007399; GO:0001843; GO:0045893; GO:0045892; GO:0048706; GO:0033599; GO:0001662; GO:0008542	GO:0003677; GO:0005515; GO:0046872; GO:0000981; GO:0000977; GO:0001227	GO:0005634; GO:0005737; GO:0005654; GO:0001650; GO:0090575	DEAF1	54006	TRUE	0.273145	0.000217414	0.00781354	chr7
ENSMUSG00000020658	ENSMUST00000111178; ENSMUST00000218166; ENSMUST00000219331; ENSMUST00000219797; ENSMUST00000217677; ENSMUST00000218545	Efr3b	protein_coding	protein_coding	EFR3 homolog B [Source:MGI Symbol;Acc:MGI:2444851]	0.5339	2998	GO:0072659; GO:0046854	GO:0003674	GO:0005829; GO:0005737; GO:0016020; GO:0005886; GO:0015629	EFR3B	668212	TRUE	-0.17186	0.000220969	0.00791645	chr12
ENSMUSG00000027227	ENSMUST00000110551	Sord	protein_coding	protein_coding	sorbitol dehydrogenase [Source:MGI Symbol;Acc:MGI:98266]	0.5038	2352	GO:0009725; GO:0030317; GO:0046688; GO:0046686; GO:0046370; GO:0019640; GO:0006060; GO:0006062; GO:0006970; GO:0009410; GO:0031667; GO:0051160; GO:0051164	GO:0008270; GO:0016491; GO:0046872; GO:0016616; GO:0042802; GO:0051287; GO:0003939; GO:0046526; GO:0047833	GO:0070062; GO:0005829; GO:0016020; GO:0005739; GO:0042995; GO:0005929; GO:0031514; GO:0031966	SORD	20322	TRUE	0.258725	0.00022136	0.00791645	chr2
ENSMUSG00000040010	ENSMUST00000045557; ENSMUST00000182165; ENSMUST00000183015	Slc7a5	protein_coding	protein_coding	solute carrier family 7 (cationic amino acid transporter, y+ system), member 5 [Source:MGI Symbol;Acc:MGI:1298205]	0.5674	1436	GO:0055085; GO:0010629; GO:0032729; GO:0006865; GO:0032740; GO:0042908; GO:0010507; GO:0032753; GO:0060252; GO:0089718; GO:0070327; GO:1905460; GO:0015804; GO:0015823; GO:0098713; GO:1903801; GO:0015807; GO:0014850; GO:0015818; GO:0015829; GO:0042149; GO:0042476; GO:0055093; GO:0071222; GO:0071230; GO:0097421; GO:1903577; GO:1904556; GO:1905534	GO:0022857; GO:0015171; GO:0015179; GO:0015175; GO:0015349; GO:0015173; GO:0015190; GO:0015297; GO:0015196	GO:0016020; GO:0005829; GO:0005737; GO:0016021; GO:0005886; GO:0043231; GO:0016324; GO:0005764; GO:0005765; GO:0016323; GO:0009925; GO:0031528; GO:0098591; GO:1990184	SLC7A5	20539	TRUE	0.252133	0.000225627	0.00804938	chr8
ENSMUSG00000044447	ENSMUST00000039135; ENSMUST00000226033; ENSMUST00000224823	Dock5	protein_coding	protein_coding	dedicator of cytokinesis 5 [Source:MGI Symbol;Acc:MGI:2652871]	0.5054	5263	GO:0050790; GO:0007264; GO:0016477; GO:1904694; GO:1900026; GO:0007520; GO:0010634; GO:1904754	GO:0005515; GO:0005096; GO:0005085; GO:0031267	GO:0005829; GO:0005737; GO:0016020; GO:0005886	DOCK5	68813	TRUE	-0.310739	0.000228521	0.00813278	chr14
ENSMUSG00000033006	ENSMUST00000230532; ENSMUST00000040019; ENSMUST00000230261; ENSMUST00000230891	Sox10	protein_coding	protein_coding	SRY (sex determining region Y)-box 10 [Source:MGI Symbol;Acc:MGI:98358]	0.6363	1834	GO:0001701; GO:0010628; GO:0045944; GO:0031643; GO:0006366; GO:0006368; GO:0048709; GO:0006357; GO:0000122; GO:0045893; GO:0030154; GO:0001755; GO:0048484; GO:0006355; GO:0045892; GO:0007422; GO:0090090; GO:0002052; GO:0007405; GO:0043066; GO:0048469; GO:0030318; GO:0032808; GO:0010626; GO:0022010; GO:0048589; GO:0048546; GO:0002009; GO:0014015; GO:0061138; GO:0014003; GO:0048863; GO:0071393; GO:…	GO:0005515; GO:0000978; GO:0003682; GO:0000976; GO:0003677; GO:0000981; GO:0003700; GO:0042802; GO:1990837; GO:0140297; GO:1990841; GO:0001216	GO:0005634; GO:0005737; GO:0000785; GO:0005654; GO:0016020; GO:0005739; GO:0005741; GO:0031315	SOX10	20665	TRUE	-0.21432	0.000230002	0.00816233	chr15
ENSMUSG00000068220	ENSMUST00000089377; ENSMUST00000229159	Lgals1	protein_coding	protein_coding	lectin, galactose binding, soluble 1 [Source:MGI Symbol;Acc:MGI:96777]	0.5514	714	GO:0045445; GO:0010977; GO:0098609; GO:0006915; GO:0043065; GO:0050729; GO:0010812; GO:0007157; GO:0031295; GO:0046598; GO:0002317; GO:0034120	GO:0030246; GO:0005515; GO:0042802; GO:0043236; GO:0005534; GO:0030395	GO:0005634; GO:0005829; GO:0005737; GO:0005615; GO:0009986; GO:0005576; GO:0062023; GO:1990724	LGALS1	16852	TRUE	0.386358	0.000230467	0.00816233	chr15
ENSMUSG00000037736	ENSMUST00000201852; ENSMUST00000101164; ENSMUST00000238785; ENSMUST00000202830; ENSMUST00000118242; ENSMUST00000130228; ENSMUST00000122812; ENSMUST00000117601; ENSMUST00000201322; ENSMUST00000238993; ENSMUST00000038188; ENSMUST00000140428; ENSMUST00000127184; ENSMUST00000202048; ENSMUST00000132991; ENSMUST00000119854; ENSMUST00000147050; ENSMUST00000137394; ENSMUST00000135334; ENSMUST00000153174	Limch1	protein_coding	protein_coding	LIM and calponin homology domains 1 [Source:MGI Symbol;Acc:MGI:1924819]	0.5168	2610	GO:0001934; GO:0031032; GO:0030336; GO:0051496; GO:0051893; GO:0060327	GO:0005515; GO:0046872; GO:0003779; GO:0032034	GO:0005737; GO:0005856; GO:0001725; GO:0016460	LIMCH1	77569	TRUE	-0.149404	0.000234484	0.00826419	chr5
ENSMUSG00000027376	ENSMUST00000028855; ENSMUST00000103214; ENSMUST00000140156; ENSMUST00000155581	Prom2	protein_coding	protein_coding	prominin 2 [Source:MGI Symbol;Acc:MGI:2138997]	0.5538	2486	GO:0001934; GO:0043087; GO:0031346; GO:0048550; GO:2001287	GO:0015485	GO:0016021; GO:0016020; GO:0005886; GO:0110165; GO:0009986; GO:0005887; GO:0016323; GO:0016324; GO:0042995; GO:0005929; GO:0031528; GO:0031410; GO:0060170; GO:0005902; GO:0045121; GO:0044393; GO:0071914	PROM2	192212	TRUE	0.904888	0.000235068	0.00826419	chr2
ENSMUSG00000056476	ENSMUST00000040846; ENSMUST00000199659; ENSMUST00000029393; ENSMUST00000040325; ENSMUST00000164225; ENSMUST00000197374	Med12l	protein_coding	protein_coding	mediator complex subunit 12-like [Source:MGI Symbol;Acc:MGI:2139916]	0.4723	6895	GO:0006357; GO:0006354; GO:0045944	GO:0003712; GO:0008013; GO:0003713	GO:0016592; GO:0005634	MED12L	329650	TRUE	-0.280594	0.000235227	0.00826419	chr3
ENSMUSG00000011171	ENSMUST00000176078; ENSMUST00000011315; ENSMUST00000100988; ENSMUST00000175785; ENSMUST00000177199; ENSMUST00000176433	Vipr2	protein_coding	protein_coding	vasoactive intestinal peptide receptor 2 [Source:MGI Symbol;Acc:MGI:107166]	0.5093	1232	GO:0007186; GO:0007166; GO:0007165; GO:0007188; GO:0048662; GO:0007190	GO:0004930; GO:0004888; GO:0004999; GO:0017046; GO:0008528	GO:0016020; GO:0016021; GO:0005886; GO:0005929	VIPR2	22355	TRUE	-0.447723	0.00023568	0.00826419	chr12
ENSMUSG00000026765	ENSMUST00000028103; ENSMUST00000153422; ENSMUST00000129867	Lypd6b	protein_coding	protein_coding	LY6/PLAUR domain containing 6B [Source:MGI Symbol;Acc:MGI:1919147]	0.5052	1065		GO:0030548	GO:0005575; GO:0016020; GO:0005886; GO:0031225	LYPD6B	71897	TRUE	-1.24347	0.000236586	0.00826419	chr2
ENSMUSG00000040557	ENSMUST00000047196; ENSMUST00000111221; ENSMUST00000111219; ENSMUST00000068617; ENSMUST00000111218; ENSMUST00000136246; ENSMUST00000201847; ENSMUST00000136815; ENSMUST00000148286	Mettl27	protein_coding	protein_coding	methyltransferase like 27 [Source:MGI Symbol;Acc:MGI:1933146]	0.5638	1357	GO:0071704	GO:0008757; GO:0008168		METTL27	79565	TRUE	0.466913	0.000236733	0.00826419	chr5
ENSMUSG00000022864	ENSMUST00000231973; ENSMUST00000232052; ENSMUST00000114220; ENSMUST00000114219; ENSMUST00000232528; ENSMUST00000114218; ENSMUST00000231272; ENSMUST00000232329	D16Ertd472e	protein_coding	protein_coding	DNA segment, Chr 16, ERATO Doi 472, expressed [Source:MGI Symbol;Acc:MGI:1196400]	0.4639	2452	GO:0007399; GO:0030154; GO:0021895; GO:0060999	GO:0005515	GO:0005575	C21orf91	67102	TRUE	-0.25917	0.000241439	0.00840841	chr16
ENSMUSG00000025407	ENSMUST00000026474; ENSMUST00000219808; ENSMUST00000218236; ENSMUST00000219671; ENSMUST00000218451	Gli1	protein_coding	protein_coding	GLI-Kruppel family member GLI1 [Source:MGI Symbol;Acc:MGI:95727]	0.5637	1505	GO:0030324; GO:0045944; GO:0009611; GO:0008284; GO:0007283; GO:0001649; GO:0006357; GO:0045893; GO:0030154; GO:0007224; GO:1902808; GO:0060045; GO:0007165; GO:0090090; GO:0045880; GO:0045740; GO:0030335; GO:0021983; GO:0009953; GO:0009954; GO:0009913; GO:2000345; GO:0097421; GO:0007286; GO:0007418; GO:0021696; GO:0021938; GO:0030850; GO:0045667; GO:0060032; GO:1990787; GO:0010604	GO:0043565; GO:0005515; GO:0000978; GO:0003682; GO:0000976; GO:0003677; GO:0046872; GO:0000981; GO:0000977; GO:0008017	GO:0005634; GO:0005829; GO:0005737; GO:0005654; GO:0005929; GO:0005930; GO:1990788	GLI1	14632	TRUE	0.410163	0.000242403	0.00841392	chr10
ENSMUSG00000036006	ENSMUST00000238974; ENSMUST00000110383; ENSMUST00000134370; ENSMUST00000091694; ENSMUST00000132689; ENSMUST00000110384; ENSMUST00000177298; ENSMUST00000058009; ENSMUST00000038477; ENSMUST00000138547; ENSMUST00000176303; ENSMUST00000177174; ENSMUST00000175986; ENSMUST00000177489	Ripor2	protein_coding	protein_coding	RHO family interacting cell polarization regulator 2 [Source:MGI Symbol;Acc:MGI:2444879]	0.5095	2435	GO:0009968; GO:0030154; GO:0007155; GO:0007605; GO:0006935; GO:0048741; GO:0007517; GO:0051726; GO:0045663; GO:0007162; GO:0051260; GO:0051491; GO:0035024; GO:0060088; GO:0042130; GO:1901673; GO:2000114; GO:1901741; GO:0045184; GO:0071260; GO:0090023; GO:2000391; GO:1990869; GO:2000405; GO:2001107; GO:1903904; GO:1905872	GO:0005515; GO:0042802; GO:0071889	GO:0005737; GO:0016020; GO:0005886; GO:0016324; GO:0005856; GO:0042995; GO:0030175; GO:0060171; GO:0005829; GO:0032420	RIPOR2	193385	TRUE	0.260771	0.000243054	0.00841392	chr13
ENSMUSG00000032548	ENSMUST00000185215; ENSMUST00000035148; ENSMUST00000190892; ENSMUST00000188664	Slco2a1	protein_coding	protein_coding	solute carrier organic anion transporter family, member 2a1 [Source:MGI Symbol;Acc:MGI:1346021]	0.5229	4190	GO:0055085; GO:0006811; GO:0043252; GO:0006869; GO:0015732	GO:0005515; GO:0022857; GO:0015347; GO:0015132	GO:0016020; GO:0016021; GO:0005886; GO:0005887	SLCO2A1	24059	TRUE	-0.513176	0.000243323	0.00841392	chr9
ENSMUSG00000036882	ENSMUST00000044338; ENSMUST00000207860; ENSMUST00000208538; ENSMUST00000207858; ENSMUST00000208522; ENSMUST00000207637; ENSMUST00000208491; ENSMUST00000208723	Arhgap33	protein_coding	protein_coding	Rho GTPase activating protein 33 [Source:MGI Symbol;Acc:MGI:2673998]	0.6102	2539	GO:0007165; GO:0050790; GO:0015031; GO:0061001; GO:0007264; GO:0009636	GO:0005515; GO:0005096; GO:0035091; GO:0019901	GO:0005737; GO:0016020; GO:0005886; GO:0032991; GO:0043197	ARHGAP33	233071	TRUE	0.214654	0.000245252	0.00846062	chr7
ENSMUSG00000015217	ENSMUST00000072699; ENSMUST00000114582; ENSMUST00000015361; ENSMUST00000088874; ENSMUST00000123100; ENSMUST00000132145	Hmgb3	protein_coding	protein_coding	high mobility group box 3 [Source:MGI Symbol;Acc:MGI:1098219]	0.4682	1344	GO:0006357; GO:0002376; GO:0045087; GO:0045638; GO:0032392; GO:0045578	GO:0003677; GO:0003723; GO:0000400; GO:0008301	GO:0005634; GO:0005737; GO:0005694	HMGB3	15354	TRUE	0.23797	0.000246916	0.00849796	chrX
ENSMUSG00000027569	ENSMUST00000169630; ENSMUST00000029085; ENSMUST00000150757; ENSMUST00000130277; ENSMUST00000123609; ENSMUST00000149969	Mrgbp	protein_coding	protein_coding	MRG/MORF4L binding protein [Source:MGI Symbol;Acc:MGI:1920497]	0.5314	1973	GO:0006355; GO:0051726; GO:0006357; GO:0006325; GO:0016573; GO:0045893; GO:0043967; GO:1905168; GO:0042981; GO:0043968; GO:2000779	GO:0003674	GO:0005634; GO:0043189; GO:0005654; GO:0035267; GO:0000786	MRGBP	73247	TRUE	0.392831	0.000248591	0.00853554	chr2
ENSMUSG00000031349	ENSMUST00000033715; ENSMUST00000155663	Nsdhl	protein_coding	protein_coding	NAD(P) dependent steroid dehydrogenase-like [Source:MGI Symbol;Acc:MGI:1099438]	0.4541	1580	GO:0006694; GO:0001942; GO:0006629; GO:0008202; GO:0008203; GO:0006695; GO:0016126; GO:0007224; GO:0060716	GO:0016616; GO:0003854; GO:0016491; GO:0000252; GO:0047012; GO:0102175; GO:0103066; GO:0103067	GO:0016020; GO:0016021; GO:0005783; GO:0005789; GO:0005811	NSDHL	18194	TRUE	0.221914	0.000250053	0.00856563	chrX
ENSMUSG00000040260	ENSMUST00000224954; ENSMUST00000057610; ENSMUST00000224595; ENSMUST00000226030	Daam2	protein_coding	protein_coding	dishevelled associated activator of morphogenesis 2 [Source:MGI Symbol;Acc:MGI:1923691]	0.5366	3892	GO:0016043; GO:0030036; GO:0016055; GO:0030833; GO:0007368; GO:0090263; GO:0090521; GO:0051489; GO:0060828; GO:0048715; GO:0021516; GO:2000050	GO:0031267; GO:0003779; GO:0005515		DAAM2	76441	TRUE	-0.254541	0.000250921	0.00857528	chr17
ENSMUSG00000026365	ENSMUST00000192880; ENSMUST00000111976; ENSMUST00000111977; ENSMUST00000066859; ENSMUST00000192919; ENSMUST00000123238; ENSMUST00000148225; ENSMUST00000194688	Cfh	protein_coding	protein_coding	complement component factor h [Source:MGI Symbol;Acc:MGI:88385]	0.3904	3487	GO:0007005; GO:0010467; GO:0006954; GO:0060041; GO:0001525; GO:0046548; GO:0002376; GO:0045087; GO:0006956; GO:0006957; GO:0001822; GO:0006508; GO:0008340; GO:0002021; GO:0046034; GO:0034097; GO:0007601; GO:0030449; GO:0030451; GO:0070527; GO:0032835; GO:0006955; GO:0050905; GO:0051640; GO:1903659; GO:0032042; GO:0001905; GO:0003406; GO:0035886; GO:0046530; GO:0070487; GO:0140053	GO:0005515; GO:0008201; GO:0001851; GO:0042802; GO:0043395	GO:0005634; GO:0005739; GO:0005737; GO:0030424; GO:0005886; GO:0005615; GO:0009897; GO:0005576; GO:0043025; GO:1905370	CFH	12628	TRUE	-0.263134	0.00025161	0.00857878	chr1
ENSMUSG00000017943	ENSMUST00000109420; ENSMUST00000109421; ENSMUST00000018087; ENSMUST00000137070	Gdap1l1	protein_coding	protein_coding	ganglioside-induced differentiation-associated protein 1-like 1 [Source:MGI Symbol;Acc:MGI:2385163]	0.5779	1678			GO:0016020; GO:0016021	GDAP1L1	228858	TRUE	0.188164	0.000255828	0.00870231	chr2
ENSMUSG00000079330	ENSMUST00000188169; ENSMUST00000112357; ENSMUST00000185436; ENSMUST00000187339; ENSMUST00000189086; ENSMUST00000191418	Lemd1	protein_coding	protein_coding	LEM domain containing 1 [Source:MGI Symbol;Acc:MGI:1922403]	0.4976	1169	GO:0008150	GO:0003674	GO:0005575; GO:0016020; GO:0016021	LEMD1	213409	TRUE	0.583089	0.000258189	0.00873624	chr1
ENSMUSG00000108601	ENSMUST00000205492	Gm44645	protein_coding	TEC	predicted gene 44645 [Source:MGI Symbol;Acc:MGI:5753221]	0.49	1653						TRUE	0.525265	0.00025819	0.00873624	chr7
ENSMUSG00000024887	ENSMUST00000237104; ENSMUST00000236504; ENSMUST00000096119; ENSMUST00000235213; ENSMUST00000236030; ENSMUST00000237697; ENSMUST00000235273; ENSMUST00000236208; ENSMUST00000236122; ENSMUST00000235395	Asah2	protein_coding	protein_coding	N-acylsphingosine amidohydrolase 2 [Source:MGI Symbol;Acc:MGI:1859310]	0.4571	3244	GO:0010033; GO:0006629; GO:0006665; GO:0006915; GO:0006672; GO:0046514; GO:0046513; GO:0007346; GO:0006670; GO:0046512; GO:0071345; GO:2001234; GO:0042759; GO:0044241	GO:0046872; GO:0016787; GO:0008270; GO:0005509; GO:0005515; GO:0017040; GO:0102121; GO:0070774; GO:0071633	GO:0005739; GO:0070062; GO:0016020; GO:0016021; GO:0000139; GO:0005794; GO:0005886; GO:0005615; GO:0045121; GO:0005576; GO:0005887; GO:0005901	ASAH2,ASAH2B	54447	TRUE	-0.365608	0.000258646	0.00873624	chr19
ENSMUSG00000026511	ENSMUST00000111018; ENSMUST00000027792; ENSMUST00000191799; ENSMUST00000193005	Srp9	protein_coding	protein_coding	signal recognition particle 9 [Source:MGI Symbol;Acc:MGI:1350930]	0.4534	1754	GO:0006614; GO:0045900	GO:0008312; GO:0003723	GO:0048500; GO:0005786; GO:0005737; GO:1990904	SRP9	27058	TRUE	0.134688	0.000259214	0.00873624	chr1
ENSMUSG00000027820	ENSMUST00000194324; ENSMUST00000194836; ENSMUST00000191633; ENSMUST00000194150; ENSMUST00000194134; ENSMUST00000029400; ENSMUST00000192002; ENSMUST00000193805	Mme	protein_coding	protein_coding	membrane metallo endopeptidase [Source:MGI Symbol;Acc:MGI:97004]	0.433	2680	GO:0006508; GO:0050769; GO:0043627; GO:0071345; GO:0030163; GO:0097242; GO:0016485; GO:0001822; GO:0050435; GO:0007611; GO:0071493; GO:0019233; GO:1900273; GO:0006518; GO:0010814; GO:0010815; GO:0042447; GO:0071492; GO:0090399; GO:0150094; GO:0046449; GO:0061837; GO:0001890; GO:0007568; GO:0030324	GO:0004222; GO:0008237; GO:0046872; GO:0016787; GO:0008233; GO:0008270; GO:0042803; GO:0004175; GO:0042277; GO:0001786; GO:0008238; GO:0070012; GO:1901612	GO:0016020; GO:0016021; GO:0045202; GO:0005737; GO:0030424; GO:0005886; GO:0043025; GO:0031410; GO:0030425; GO:0005769; GO:0005903; GO:0045121; GO:0008021; GO:0005802; GO:0098793; GO:0044306	MME	17380	TRUE	-0.588924	0.00026176	0.00879325	chr3
ENSMUSG00000029026	ENSMUST00000239448; ENSMUST00000133533; ENSMUST00000105644; ENSMUST00000097762; ENSMUST00000105643; ENSMUST00000097763; ENSMUST00000155642; ENSMUST00000139634	Trp73	protein_coding	protein_coding	transformation related protein 73 [Source:MGI Symbol;Acc:MGI:1336991]	0.5895	2774	GO:0006355; GO:0006915; GO:0051262; GO:0051726; GO:0007049; GO:0043065; GO:2001233; GO:0001822; GO:0006974; GO:0007346; GO:0009410; GO:0010243; GO:0010468; GO:0042771; GO:0043410; GO:0045665; GO:0045893; GO:0045944; GO:0048714; GO:0060044; GO:1901248; GO:0009791; GO:0006954; GO:0043524; GO:0008285; GO:0006357; GO:0030900; GO:0045793; GO:0021766; GO:0048666; GO:0033326; GO:0043523; GO:2001235; GO:…	GO:0005515; GO:0003677; GO:0003700; GO:0000976; GO:0046872; GO:0000978; GO:0000981; GO:0001228; GO:0002039; GO:0019901; GO:0042802; GO:0043565; GO:0061629; GO:0097371; GO:0140297; GO:0001222	GO:0005634; GO:0005737; GO:0000785; GO:0005654; GO:0005794; GO:0030054; GO:0043231	TP73	22062	TRUE	-0.738546	0.000262108	0.00879325	chr4
ENSMUSG00000105594	ENSMUST00000196584	Gm43398	protein_coding	TEC	predicted gene 43398 [Source:MGI Symbol;Acc:MGI:5663535]	0.4767	2742						TRUE	0.411136	0.000264111	0.00884016	chr5
ENSMUSG00000018286	ENSMUST00000145503; ENSMUST00000018430; ENSMUST00000148535; ENSMUST00000128870	Psmb6	protein_coding	protein_coding	proteasome (prosome, macropain) subunit, beta type 6 [Source:MGI Symbol;Acc:MGI:104880]	0.5264	776	GO:0051603; GO:0006508; GO:0010498	GO:0016787; GO:0008233; GO:0004298; GO:0004175	GO:0005839; GO:0005634; GO:0005829; GO:0005737; GO:0005654; GO:0000502; GO:0019774	PSMB6	19175	TRUE	0.173616	0.000265828	0.0088644	chr11
ENSMUSG00000028070	ENSMUST00000029708	Naxe	protein_coding	protein_coding	NAD(P)HX epimerase [Source:MGI Symbol;Acc:MGI:2180167]	0.5518	908	GO:0016525; GO:0006869; GO:0002040; GO:0010874; GO:0031580; GO:0046496	GO:0046872; GO:0000166; GO:0016853; GO:0042802; GO:0052856; GO:0052857	GO:0005739; GO:0005615; GO:0005576; GO:0044297; GO:0005929	NAXE	246703	TRUE	0.186581	0.000266047	0.0088644	chr3
ENSMUSG00000038095	ENSMUST00000065263; ENSMUST00000199808; ENSMUST00000168651; ENSMUST00000196842; ENSMUST00000199245; ENSMUST00000197228; ENSMUST00000197723; ENSMUST00000200474; ENSMUST00000198285; ENSMUST00000196644; ENSMUST00000196647; ENSMUST00000196329; ENSMUST00000199004; ENSMUST00000200674; ENSMUST00000196711; ENSMUST00000198420; ENSMUST00000197777; ENSMUST00000197974	Sbno1	protein_coding	protein_coding	strawberry notch 1 [Source:MGI Symbol;Acc:MGI:2384298]	0.4377	2650	GO:0006355; GO:0048583			SBNO1	243272	TRUE	-0.163886	0.000266768	0.0088682	chr5
ENSMUSG00000036295	ENSMUST00000043884	Lrrn3	protein_coding	protein_coding	leucine rich repeat protein 3, neuronal [Source:MGI Symbol;Acc:MGI:106036]	0.4323	3865	GO:0001934; GO:0051965	GO:0005515; GO:0044877	GO:0016020; GO:0016021; GO:0005886; GO:0005615; GO:0031012; GO:0030131	LRRN3	16981	TRUE	-0.24771	0.000269184	0.00889117	chr12
ENSMUSG00000030218	ENSMUST00000032342; ENSMUST00000203103	Mgp	protein_coding	protein_coding	matrix Gla protein [Source:MGI Symbol;Acc:MGI:96976]	0.503	666	GO:0030324; GO:0030154; GO:0001503; GO:0051216; GO:0065003; GO:0030500; GO:0048754	GO:0005509; GO:0048306	GO:0005576; GO:0005615; GO:0032991; GO:0005783; GO:0062023; GO:0031012	MGP	17313	TRUE	-0.523348	0.000269264	0.00889117	chr6
ENSMUSG00000047797	ENSMUST00000119080; ENSMUST00000052130; ENSMUST00000119190	Gjb1	protein_coding	protein_coding	gap junction protein, beta 1 [Source:MGI Symbol;Acc:MGI:95719]	0.5646	1554	GO:0007154; GO:0055085; GO:0007267; GO:0015868; GO:1905867	GO:0042802; GO:0005243	GO:0005922; GO:0005737; GO:0016020; GO:0016021; GO:0005886; GO:0032991; GO:0070161; GO:0016328; GO:0005921	GJB1	14618	TRUE	-0.254803	0.000269282	0.00889117	chrX
ENSMUSG00000060568	ENSMUST00000165874; ENSMUST00000190081; ENSMUST00000156025; ENSMUST00000126198; ENSMUST00000122929; ENSMUST00000128373	Fam78b	protein_coding	protein_coding	family with sequence similarity 78, member B [Source:MGI Symbol;Acc:MGI:2443050]	0.4994	3580	GO:0008150	GO:0003674	GO:0005575	FAM78B	226610	TRUE	-0.412036	0.00027296	0.00899231	chr1
ENSMUSG00000026600	ENSMUST00000189661; ENSMUST00000051396; ENSMUST00000186420; ENSMUST00000187987; ENSMUST00000191379; ENSMUST00000187507; ENSMUST00000187073; ENSMUST00000188027	Soat1	protein_coding	protein_coding	sterol O-acyltransferase 1 [Source:MGI Symbol;Acc:MGI:104665]	0.4748	2020	GO:0006629; GO:0008202; GO:0008203; GO:0042632; GO:0010742; GO:0033344; GO:0034379; GO:0034435; GO:0042986; GO:0010878	GO:0016740; GO:0008374; GO:0016746; GO:0042802; GO:0015485; GO:0000062; GO:0004772; GO:0034736	GO:0016020; GO:0016021; GO:0005783; GO:0005789	SOAT1	20652	TRUE	-0.160635	0.000274211	0.00901322	chr1
ENSMUSG00000023036	ENSMUST00000066140; ENSMUST00000195239; ENSMUST00000193222	Pcdhgc4	protein_coding	protein_coding	protocadherin gamma subfamily C, 4 [Source:MGI Symbol;Acc:MGI:1935203]	0.5406	3465	GO:0007156; GO:0007155; GO:0043524; GO:0050808	GO:0005509; GO:0003674	GO:0016020; GO:0005886; GO:0016021	PCDHGC4	93707	TRUE	0.434983	0.000275983	0.00905113	chr18
ENSMUSG00000020843	ENSMUST00000120699; ENSMUST00000021203; ENSMUST00000152183; ENSMUST00000164102	Timm22	protein_coding	protein_coding	translocase of inner mitochondrial membrane 22 [Source:MGI Symbol;Acc:MGI:1929742]	0.5553	1098	GO:0015031; GO:0045039; GO:0071806	GO:0008320; GO:0005515; GO:0140318; GO:0030943	GO:0016020; GO:0016021; GO:0005739; GO:0005743; GO:0042721	TIMM22	56322	TRUE	0.22983	0.000277449	0.00907886	chr11
ENSMUSG00000033278	ENSMUST00000037974; ENSMUST00000223982; ENSMUST00000225074; ENSMUST00000224091; ENSMUST00000225554; ENSMUST00000225688; ENSMUST00000224862	Ptprm	protein_coding	protein_coding	protein tyrosine phosphatase, receptor type, M [Source:MGI Symbol;Acc:MGI:102694]	0.517	2785	GO:0006470; GO:0016311; GO:0001937; GO:0007156; GO:0007165; GO:0009410; GO:0010596; GO:0010842; GO:0016525; GO:0031175; GO:0031290; GO:0007155; GO:0042311	GO:0005515; GO:0016791; GO:0004725; GO:0016787; GO:0004721; GO:0005001; GO:0042802; GO:0045296	GO:0016020; GO:0016021; GO:0005737; GO:0005886; GO:0005911; GO:0005912; GO:0030027; GO:0043232; GO:0048471	PTPRM	19274	TRUE	0.246573	0.000278071	0.00907889	chr17
ENSMUSG00000106870	ENSMUST00000201581	Gm43681	protein_coding	TEC	predicted gene 43681 [Source:MGI Symbol;Acc:MGI:5663818]	0.3889	1903						TRUE	0.957018	0.000279122	0.00909292	chr5
ENSMUSG00000048537	ENSMUST00000147495; ENSMUST00000144251; ENSMUST00000156918; ENSMUST00000128326; ENSMUST00000138356; ENSMUST00000034611; ENSMUST00000135436; ENSMUST00000148344; ENSMUST00000134465; ENSMUST00000129806; ENSMUST00000133312; ENSMUST00000123310; ENSMUST00000154723; ENSMUST00000123123; ENSMUST00000123406; ENSMUST00000148929; ENSMUST00000126818; ENSMUST00000123003	Phldb1	protein_coding	protein_coding	pleckstrin homology like domain, family B, member 1 [Source:MGI Symbol;Acc:MGI:2143230]	0.5955	2550	GO:0010470; GO:0010717; GO:0070507; GO:1904261	GO:0003674	GO:0005829; GO:0005886; GO:0043231; GO:0045171; GO:0045180	PHLDB1	102693	TRUE	-0.171527	0.000284812	0.00925767	chr9
ENSMUSG00000036764	ENSMUST00000129625; ENSMUST00000043317; ENSMUST00000136832	Dnajc12	protein_coding	protein_coding	DnaJ heat shock protein family (Hsp40) member C12 [Source:MGI Symbol;Acc:MGI:1353428]	0.4687	2087	GO:0008150	GO:0003674	GO:0005737	DNAJC12	30045	TRUE	0.238504	0.000285623	0.00926345	chr10
ENSMUSG00000039191	ENSMUST00000201991; ENSMUST00000201721; ENSMUST00000087360; ENSMUST00000037618; ENSMUST00000201912; ENSMUST00000113865; ENSMUST00000201883; ENSMUST00000201928; ENSMUST00000200856; ENSMUST00000201701; ENSMUST00000202476; ENSMUST00000202092	Rbpj	protein_coding	protein_coding	recombination signal binding protein for immunoglobulin kappa J region [Source:MGI Symbol;Acc:MGI:96522]	0.4316	2873	GO:0006355; GO:0045944; GO:0006357; GO:0010628; GO:0010468; GO:0045596; GO:0002437; GO:0000122; GO:0007507; GO:0050679; GO:0072089; GO:0009957; GO:0001525; GO:0008283; GO:0030182; GO:0035019; GO:0001837; GO:0050673; GO:0045893; GO:0042742; GO:0030183; GO:0007219; GO:0030097; GO:0045892; GO:0120163; GO:2000647; GO:0001756; GO:0048844; GO:0030154; GO:0030216; GO:0045165; GO:0048820; GO:0021983; GO:…	GO:0003677; GO:0003700; GO:0001228; GO:0000978; GO:0043565; GO:0005515; GO:0044877; GO:0003682; GO:0000981; GO:0061629; GO:0140297; GO:0047485	GO:0005634; GO:0005730; GO:0005737; GO:0005654; GO:0032991; GO:0032993; GO:0005667; GO:0017053; GO:0002193	RBPJ	19664	TRUE	-0.265254	0.000293935	0.00951192	chr5
ENSMUSG00000071866	ENSMUST00000132846; ENSMUST00000135789; ENSMUST00000090749; ENSMUST00000137829; ENSMUST00000155824; ENSMUST00000213200	Ppia	protein_coding	protein_coding	peptidylprolyl isomerase A [Source:MGI Symbol;Acc:MGI:97749]	0.4837	1208	GO:0006457; GO:0000413; GO:0045069; GO:0006915; GO:0001933; GO:0030182; GO:0051092; GO:0001934; GO:0043410; GO:0032148; GO:2001233; GO:0030593; GO:0035307; GO:0034599; GO:0050714; GO:0030168; GO:0006469; GO:0030595; GO:0045070; GO:0042118; GO:1902176; GO:0032873; GO:0034389; GO:0060352; GO:0061944; GO:0070527; GO:1903901	GO:0003755; GO:0005515; GO:0016853; GO:0016018; GO:0005178; GO:1904399	GO:0005634; GO:0005737; GO:0005615; GO:0032991; GO:0005829; GO:0005576; GO:0043231; GO:0043209	PPIA	268373	TRUE	0.142884	0.000296602	0.00957704	chr11
ENSMUSG00000027298	ENSMUST00000110783; ENSMUST00000147636; ENSMUST00000148343; ENSMUST00000028763; ENSMUST00000135726; ENSMUST00000130456; ENSMUST00000147761; ENSMUST00000137135	Tyro3	protein_coding	protein_coding	TYRO3 protein tyrosine kinase 3 [Source:MGI Symbol;Acc:MGI:104294]	0.5674	1847	GO:0006468; GO:0007283; GO:0043524; GO:0043491; GO:0051402; GO:0016310; GO:0050896; GO:0007155; GO:0018108; GO:0051649; GO:0046718; GO:0016477; GO:0034446; GO:0046777; GO:0001764; GO:0007399; GO:0034122; GO:0070527; GO:0032940; GO:0050728; GO:0001779; GO:0060068; GO:0007169; GO:0033674; GO:0030168; GO:1903902; GO:0007218; GO:0043277; GO:0070050; GO:0046649; GO:0045824; GO:0042698; GO:0006909; GO:…	GO:0005515; GO:0005524; GO:0004672; GO:0016740; GO:0000166; GO:0016301; GO:0004713; GO:0004714; GO:0001618; GO:0043548	GO:0005634; GO:0016020; GO:0016021; GO:0005886; GO:0005789; GO:0009986; GO:0005887; GO:0005635; GO:0043235	TYRO3	22174	TRUE	-0.174998	0.000300587	0.00968434	chr2
ENSMUSG00000038390	ENSMUST00000046893; ENSMUST00000204161; ENSMUST00000204667; ENSMUST00000204253	Gpr162	protein_coding	protein_coding	G protein-coupled receptor 162 [Source:MGI Symbol;Acc:MGI:1315214]	0.6017	2395	GO:0007186; GO:0008150; GO:0007165	GO:0004930; GO:0003674	GO:0016021; GO:0005575; GO:0016020; GO:0005886	GPR162	14788	TRUE	0.165291	0.000305609	0.00982448	chr6
ENSMUSG00000042129	ENSMUST00000035842; ENSMUST00000203029; ENSMUST00000203477; ENSMUST00000204313; ENSMUST00000203634; ENSMUST00000204203; ENSMUST00000204576	Rassf4	protein_coding	protein_coding	Ras association (RalGDS/AF-6) domain family member 4 [Source:MGI Symbol;Acc:MGI:2386853]	0.5211	1729	GO:0007165; GO:0007049	GO:0003674	GO:0005575	RASSF4	213391	TRUE	-0.526201	0.000306473	0.00983067	chr6
ENSMUSG00000026452	ENSMUST00000187725; ENSMUST00000188842; ENSMUST00000121990; ENSMUST00000187702	Syt2	protein_coding	protein_coding	synaptotagmin II [Source:MGI Symbol;Acc:MGI:99666]	0.5462	2783	GO:0007269; GO:1903861	GO:0046872; GO:0005509; GO:0005544	GO:0031410; GO:0045202; GO:0008021; GO:0030672; GO:0016020; GO:0016021; GO:0070161; GO:0042584	SYT2	20980	TRUE	-0.673456	0.000312789	0.0100113	chr1
ENSMUSG00000071711	ENSMUST00000229791; ENSMUST00000167140; ENSMUST00000043865; ENSMUST00000231159; ENSMUST00000169133; ENSMUST00000229739	Mpst	protein_coding	protein_coding	mercaptopyruvate sulfurtransferase [Source:MGI Symbol;Acc:MGI:2179733]	0.606	1128	GO:0001822; GO:0001889; GO:0019346; GO:0070814; GO:0021510	GO:0016783; GO:0004792; GO:0016740; GO:0042802; GO:0016784	GO:0005739; GO:0005829; GO:0005737; GO:0045202; GO:0043005; GO:0005743	MPST	246221	TRUE	0.289451	0.000316308	0.0101018	chr15
ENSMUSG00000052609	ENSMUST00000217730; ENSMUST00000075249; ENSMUST00000218461; ENSMUST00000219063; ENSMUST00000218380; ENSMUST00000219751; ENSMUST00000218357; ENSMUST00000219426; ENSMUST00000218427	Plekhg3	protein_coding	protein_coding	pleckstrin homology domain containing, family G (with RhoGef domain) member 3 [Source:MGI Symbol;Acc:MGI:2388284]	0.5564	3148	GO:0050790; GO:0030334; GO:2000114	GO:0005085; GO:0003779	GO:0005575; GO:0005737; GO:0005856	PLEKHG3	263406	TRUE	-0.204364	0.000320121	0.0102013	chr12
ENSMUSG00000041797	ENSMUST00000044850; ENSMUST00000126499	Abca9	protein_coding	protein_coding	ATP-binding cassette, sub-family A (ABC1), member 9 [Source:MGI Symbol;Acc:MGI:2386796]	0.4259	4419	GO:0055085; GO:0006869	GO:0005524; GO:0000166; GO:0140359; GO:0042626; GO:0005319	GO:0005739; GO:0016020; GO:0016021; GO:0110165; GO:0043231	ABCA9	217262	TRUE	-0.342069	0.000321734	0.0102215	chr11
ENSMUSG00000036040	ENSMUST00000091233; ENSMUST00000169787; ENSMUST00000143246; ENSMUST00000130600; ENSMUST00000139633	Adamtsl2	protein_coding	protein_coding	ADAMTS-like 2 [Source:MGI Symbol;Acc:MGI:1925044]	0.5635	2286	GO:0030198; GO:0030512; GO:0060481	GO:0005515; GO:0050436	GO:0005576; GO:0031012	ADAMTSL2	77794	TRUE	0.565195	0.000322153	0.0102215	chr2
ENSMUSG00000053930	ENSMUST00000123454; ENSMUST00000066679; ENSMUST00000134562	Shisa6	protein_coding	protein_coding	shisa family member 6 [Source:MGI Symbol;Acc:MGI:2685725]	0.5329	3038	GO:0016055; GO:0007283; GO:0090090; GO:2000311; GO:0048172; GO:0098962; GO:0098970; GO:0098976; GO:1904717	GO:0030165; GO:0035255	GO:0016020; GO:0016021; GO:0005886; GO:0045202; GO:0045211; GO:0098839; GO:0014069; GO:0098978; GO:0099061; GO:0032591; GO:0032281; GO:0098985	SHISA6	380702	TRUE	-0.381122	0.000323956	0.0102565	chr11
ENSMUSG00000021413	ENSMUST00000077853; ENSMUST00000221639; ENSMUST00000222509; ENSMUST00000220965; ENSMUST00000221077; ENSMUST00000223228; ENSMUST00000221784; ENSMUST00000221087; ENSMUST00000221156; ENSMUST00000222834	Prpf4b	protein_coding	protein_coding	pre-mRNA processing factor 4B [Source:MGI Symbol;Acc:MGI:109584]	0.4271	2009	GO:0006468; GO:0016310; GO:0008380; GO:0006397; GO:0045292	GO:0005524; GO:0004672; GO:0016740; GO:0000166; GO:0016301; GO:0004674; GO:0106310	GO:0016607; GO:0005634; GO:0005681; GO:0071013; GO:0005694	PRPF4B	19134	TRUE	-0.128498	0.000324989	0.010267	chr13
ENSMUSG00000031491	ENSMUST00000033882	Chrna6	protein_coding	protein_coding	cholinergic receptor, nicotinic, alpha polypeptide 6 [Source:MGI Symbol;Acc:MGI:106213]	0.4763	2906	GO:0006811; GO:0034220; GO:0060078; GO:0060079; GO:0007165; GO:0007268; GO:0042391; GO:0050877; GO:0051899; GO:2000300; GO:0014059	GO:0005230; GO:0005515; GO:0004888; GO:0005216; GO:0022848; GO:0005231; GO:0030594; GO:1904315; GO:1901363	GO:0016021; GO:0016020; GO:0005886; GO:0110165; GO:0032991; GO:0005887; GO:0045202; GO:0045211; GO:0043005; GO:0005892; GO:0099056; GO:0099055; GO:0098691	CHRNA6	11440	TRUE	-2.55764	0.000328626	0.0103595	chr8
ENSMUSG00000020053	ENSMUST00000122386; ENSMUST00000095360; ENSMUST00000105300; ENSMUST00000121952; ENSMUST00000126490; ENSMUST00000062862; ENSMUST00000121161; ENSMUST00000122100	Igf1	protein_coding	protein_coding	insulin-like growth factor 1 [Source:MGI Symbol;Acc:MGI:96432]	0.4768	1964	GO:0043066; GO:0030324; GO:0010629; GO:0010628; GO:0045944; GO:0048146; GO:0014904; GO:0045445; GO:0051450; GO:0008284; GO:0010468; GO:0035264; GO:0071333; GO:0030307; GO:0043491; GO:0043154; GO:0051897; GO:0045669; GO:0070371; GO:0008285; GO:0050679; GO:0006417; GO:0008283; GO:0030879; GO:0042127; GO:0007165; GO:0001932; GO:0007608; GO:0045893; GO:0009408; GO:0043410; GO:0097192; GO:0070373; GO:…	GO:0005179; GO:0005515; GO:0008083; GO:0005496; GO:0005178; GO:0043539; GO:0005158; GO:0005159	GO:0005576; GO:0005737; GO:0005886; GO:0005615; GO:0043025; GO:0005614; GO:0031091; GO:0035867; GO:0042567; GO:0070382	IGF1	16000	TRUE	-0.478645	0.000330126	0.0103844	chr10
ENSMUSG00000042961	ENSMUST00000058593; ENSMUST00000096494; ENSMUST00000160207; ENSMUST00000160314; ENSMUST00000160273; ENSMUST00000162105; ENSMUST00000159726	Egflam	protein_coding	protein_coding	EGF-like, fibronectin type III and laminin G domains [Source:MGI Symbol;Acc:MGI:2146149]	0.5308	2639	GO:0010811; GO:0030198; GO:0009887; GO:0009888; GO:0019800	GO:0005515; GO:0005509; GO:0005539	GO:0045202; GO:0005576; GO:0042995; GO:0031012; GO:0071944; GO:0005614; GO:0005604; GO:0048786; GO:0043083	EGFLAM	268780	TRUE	0.378862	0.000331885	0.0104174	chr15
ENSMUSG00000024350	ENSMUST00000025208; ENSMUST00000235930; ENSMUST00000237995; ENSMUST00000236738	Dnajc18	protein_coding	protein_coding	DnaJ heat shock protein family (Hsp40) member C18 [Source:MGI Symbol;Acc:MGI:1923844]	0.4766	1802	GO:0030433; GO:0051085; GO:0071218	GO:0030544	GO:0016020; GO:0016021; GO:0005789	DNAJC18	76594	TRUE	-0.116156	0.000337501	0.0105709	chr18
ENSMUSG00000068263	ENSMUST00000160743; ENSMUST00000159570; ENSMUST00000032132; ENSMUST00000159956; ENSMUST00000159681	Efcc1	protein_coding	protein_coding	EF hand and coiled-coil domain containing 1 [Source:MGI Symbol;Acc:MGI:3611451]	0.5999	1554	GO:0008150	GO:0005509; GO:0003674	GO:0005829	EFCC1	58229	TRUE	-0.538979	0.000341915	0.0106863	chr6
ENSMUSG00000027434	ENSMUST00000109970; ENSMUST00000067075; ENSMUST00000109969; ENSMUST00000172627	Nkx2-2	protein_coding	protein_coding	NK2 homeobox 2 [Source:MGI Symbol;Acc:MGI:97347]	0.6136	972	GO:0006355; GO:0006357; GO:0045944; GO:0003323; GO:0010628; GO:0021522; GO:0045666; GO:0048714; GO:0003309; GO:0048709; GO:0030182; GO:0030154; GO:0007399; GO:0048708; GO:0007224; GO:0048665; GO:0014003; GO:0045665; GO:0048565; GO:0048468; GO:0030858; GO:0031018; GO:0061101; GO:0003326; GO:0003327; GO:0003329; GO:0009749; GO:0014070; GO:0021529; GO:0021530; GO:0021554; GO:0032570; GO:0060580	GO:0003677; GO:0000981; GO:0000978; GO:0001228; GO:0043565; GO:0005515; GO:0003700; GO:0000987	GO:0005634	NKX2-2	18088	TRUE	-0.367212	0.000345081	0.0107623	chr2
ENSMUSG00000053626	ENSMUST00000066166; ENSMUST00000209451; ENSMUST00000211755; ENSMUST00000210256	Tll1	protein_coding	protein_coding	tolloid-like [Source:MGI Symbol;Acc:MGI:106923]	0.5231	2720	GO:0006508	GO:0005509; GO:0004222; GO:0008270; GO:0046872; GO:0016787; GO:0008233; GO:0008237		TLL1	21892	TRUE	0.780583	0.000348058	0.0108168	chr8
ENSMUSG00000034602	ENSMUST00000073792; ENSMUST00000222536; ENSMUST00000037557; ENSMUST00000219290; ENSMUST00000170935; ENSMUST00000218735; ENSMUST00000219241; ENSMUST00000219515; ENSMUST00000219001; ENSMUST00000220201; ENSMUST00000218253; ENSMUST00000219203	Mon2	protein_coding	protein_coding	MON2 homolog, regulator of endosome to Golgi trafficking [Source:MGI Symbol;Acc:MGI:1914324]	0.473	2807	GO:0015031; GO:0006895		GO:0016020; GO:0005829; GO:0031901; GO:0005768; GO:0016021	MON2	67074	TRUE	-0.109372	0.000348359	0.0108168	chr10
ENSMUSG00000038451	ENSMUST00000047760; ENSMUST00000143040; ENSMUST00000052727; ENSMUST00000130160; ENSMUST00000112473	Spsb2	protein_coding	protein_coding	splA/ryanodine receptor domain and SOCS box containing 2 [Source:MGI Symbol;Acc:MGI:1315199]	0.6039	1082	GO:0006511; GO:0016567; GO:0035556; GO:0043161	GO:0005515; GO:1990756	GO:0005829; GO:0005737; GO:0019005	SPSB2	14794	TRUE	0.438813	0.000349048	0.0108168	chr6
ENSMUSG00000075478	ENSMUST00000100322	Slitrk1	protein_coding	protein_coding	SLIT and NTRK-like family, member 1 [Source:MGI Symbol;Acc:MGI:2679446]	0.4712	5359	GO:0035264; GO:0007409; GO:0007399; GO:0007416; GO:0099560; GO:0030534; GO:0051965; GO:0050807; GO:1905606; GO:0050772; GO:0042592	GO:0005515; GO:0003674	GO:0016020; GO:0016021; GO:0045202; GO:0005576; GO:0098978; GO:0099061; GO:0098982	SLITRK1	76965	TRUE	-0.161758	0.000351841	0.0108803	chr14
ENSMUSG00000089774	ENSMUST00000113975; ENSMUST00000131098	Slc5a3	protein_coding	protein_coding	solute carrier family 5 (inositol transporters), member 3 [Source:MGI Symbol;Acc:MGI:1858226]	0.4536	5717	GO:0055085; GO:0006811; GO:0006814; GO:0007422; GO:0006020; GO:1904659; GO:1903428; GO:0043576; GO:0032409; GO:0015798; GO:0043085; GO:1905477	GO:0022857; GO:0005515; GO:0015293; GO:0044325; GO:0005412; GO:0015459	GO:0016020; GO:0016021; GO:0005886; GO:0048471; GO:0008076	SLC5A3	53881	TRUE	-0.377007	0.000354876	0.0109276	chr16
ENSMUSG00000015653	ENSMUST00000115426; ENSMUST00000164219; ENSMUST00000115427; ENSMUST00000115425; ENSMUST00000015797; ENSMUST00000149412; ENSMUST00000115424; ENSMUST00000148333; ENSMUST00000150238	Steap2	protein_coding	protein_coding	six transmembrane epithelial antigen of prostate 2 [Source:MGI Symbol;Acc:MGI:1921301]	0.4337	4673	GO:0006811; GO:0055072; GO:0009725; GO:0006897; GO:0006893; GO:0045055; GO:0098705; GO:0015677; GO:0098706; GO:0098711	GO:0046872; GO:0016491; GO:0008823; GO:0052851	GO:0005829; GO:0016020; GO:0016021; GO:0005886; GO:0005768; GO:0005769; GO:0010008; GO:0030173; GO:0030140	STEAP2	74051	TRUE	-0.312098	0.000355371	0.0109276	chr5
ENSMUSG00000021573	ENSMUST00000140217; ENSMUST00000022057	Tppp	protein_coding	protein_coding	tubulin polymerization promoting protein [Source:MGI Symbol;Acc:MGI:1920198]	0.5444	2749	GO:0031643; GO:0007049; GO:0051301; GO:0001578; GO:0046785; GO:0070507; GO:0048709; GO:0030953; GO:0032288; GO:0032273; GO:1904428; GO:0014003; GO:0051418; GO:0031334	GO:0046872; GO:0016787; GO:0015631; GO:0042803; GO:0000287; GO:0003924; GO:0008017	GO:0005739; GO:0005634; GO:0005829; GO:0005737; GO:0005794; GO:0048471; GO:0005856; GO:0005874; GO:0005819; GO:0043209; GO:0072686; GO:0097427; GO:0150051	TPPP	72948	TRUE	-0.108423	0.000355612	0.0109276	chr13
ENSMUSG00000037206	ENSMUST00000041477; ENSMUST00000168864; ENSMUST00000217578	Islr	protein_coding	protein_coding	immunoglobulin superfamily containing leucine-rich repeat [Source:MGI Symbol;Acc:MGI:1349645]	0.5669	1700		GO:0005515	GO:0005576; GO:0005615	ISLR	26968	TRUE	-0.828021	0.000356977	0.0109466	chr9
ENSMUSG00000024064	ENSMUST00000024858; ENSMUST00000232785; ENSMUST00000112591; ENSMUST00000233326; ENSMUST00000146565	Galnt14	protein_coding	protein_coding	polypeptide N-acetylgalactosaminyltransferase 14 [Source:MGI Symbol;Acc:MGI:1918935]	0.5361	2141	GO:0006486; GO:0008150; GO:0006493	GO:0016740; GO:0016757; GO:0030246; GO:0004653; GO:0003674; GO:0046872	GO:0016020; GO:0016021; GO:0000139; GO:0005794	GALNT14	71685	TRUE	-0.286836	0.000361366	0.0110525	chr17
ENSMUSG00000031605	ENSMUST00000034017; ENSMUST00000210166; ENSMUST00000209919; ENSMUST00000209458; ENSMUST00000209544	Klhl2	protein_coding	protein_coding	kelch-like 2, Mayven [Source:MGI Symbol;Acc:MGI:1924363]	0.4751	2688	GO:0016567	GO:0005515; GO:0003779; GO:0042802; GO:0042803	GO:0005737; GO:0005829; GO:0015629; GO:0005856; GO:0042995; GO:0030027; GO:0001726; GO:0031463; GO:0001725	KLHL2	77113	TRUE	-0.243648	0.000361945	0.0110525	chr8
ENSMUSG00000026179	ENSMUST00000113805; ENSMUST00000027370; ENSMUST00000129219; ENSMUST00000138620; ENSMUST00000087226; ENSMUST00000152492; ENSMUST00000087225; ENSMUST00000190398	Pnkd	protein_coding	protein_coding	paroxysmal nonkinesiogenic dyskinesia [Source:MGI Symbol;Acc:MGI:1930773]	0.5595	1865	GO:0019243; GO:0050884; GO:0046929; GO:0042053; GO:0032225	GO:0004416; GO:0005515; GO:0046872; GO:0016787	GO:0016020; GO:0016021; GO:0005739; GO:0005634; GO:0005737	PNKD	56695	TRUE	-0.28597	0.000363011	0.011062	chr1
ENSMUSG00000051007	ENSMUST00000106008; ENSMUST00000156353; ENSMUST00000140337; ENSMUST00000127556; ENSMUST00000209276; ENSMUST00000128006; ENSMUST00000142852	Gatd1	protein_coding	protein_coding	glutamine amidotransferase like class 1 domain containing 1 [Source:MGI Symbol;Acc:MGI:2387178]	0.5411	1384	GO:0019243; GO:0019249	GO:0019172	GO:0005576; GO:0005737	GATD1	213350	TRUE	0.197483	0.000364202	0.0110752	chr7
ENSMUSG00000003279	ENSMUST00000133983; ENSMUST00000060072; ENSMUST00000155823; ENSMUST00000125691; ENSMUST00000150798; ENSMUST00000146730; ENSMUST00000130971; ENSMUST00000155016; ENSMUST00000135938; ENSMUST00000233173; ENSMUST00000233283; ENSMUST00000133717; ENSMUST00000156946; ENSMUST00000232998; ENSMUST00000126801; ENSMUST00000148486; ENSMUST00000140728; ENSMUST00000150260; ENSMUST00000097288; ENSMUST00000233780	Dlgap1	protein_coding	protein_coding	DLG associated protein 1 [Source:MGI Symbol;Acc:MGI:1346065]	0.5216	3227	GO:0023052; GO:0007268; GO:0098962; GO:0099562; GO:0061136; GO:0035418; GO:0070842	GO:0044877; GO:0005515; GO:0019904; GO:0060090; GO:0098919	GO:0045202; GO:0014069; GO:0016020; GO:0005886; GO:0098978; GO:0099092; GO:0045211; GO:0099572	DLGAP1	224997	TRUE	0.237252	0.000371316	0.0112681	chr17
ENSMUSG00000008318	ENSMUST00000008462; ENSMUST00000155413; ENSMUST00000156855; ENSMUST00000139604; ENSMUST00000136231; ENSMUST00000142885	Relt	protein_coding	protein_coding	RELT tumor necrosis factor receptor [Source:MGI Symbol;Acc:MGI:2443373]	0.5983	1094	GO:0006915; GO:0097186; GO:0012501	GO:0005515	GO:0005654; GO:0005737; GO:0016020; GO:0016021; GO:0005886; GO:0048471	RELT	320100	TRUE	0.251906	0.000375473	0.0113707	chr7
ENSMUSG00000041235	ENSMUST00000170457; ENSMUST00000127476; ENSMUST00000039267; ENSMUST00000051558; ENSMUST00000129655; ENSMUST00000170391; ENSMUST00000130709; ENSMUST00000222546	Chd7	protein_coding	protein_coding	chromodomain helicase DNA binding protein 7 [Source:MGI Symbol;Acc:MGI:2444748]	0.5308	4030	GO:0007605; GO:0001701; GO:0048771; GO:0009617; GO:0045944; GO:0007417; GO:0060041; GO:0060173; GO:0003007; GO:0001501; GO:0006366; GO:0007626; GO:0043010; GO:0006325; GO:0006364; GO:0010468; GO:0042472; GO:0060021; GO:0006338; GO:0003222; GO:0050890; GO:0010880; GO:0035904; GO:0030217; GO:0001568; GO:0050767; GO:0001974; GO:0003226; GO:0007512; GO:0007628; GO:0008015; GO:0021545; GO:0021553; GO:…	GO:0005515; GO:0005524; GO:0140658; GO:0000978; GO:0003677; GO:0016787; GO:0000166; GO:0016887; GO:0042393; GO:0004386; GO:0003682; GO:1990841	GO:0005634; GO:0005730; GO:0005654; GO:0000785	CHD7	320790	TRUE	-0.230936	0.000378179	0.011429	chr4
ENSMUSG00000022026	ENSMUST00000226541; ENSMUST00000228749; ENSMUST00000088735	Olfm4	protein_coding	protein_coding	olfactomedin 4 [Source:MGI Symbol;Acc:MGI:2685142]	0.4592	1683	GO:0007155; GO:0007165; GO:0043124; GO:1900026; GO:0006955; GO:0050777	GO:0005515; GO:0045296; GO:0005198	GO:0005829; GO:0005654; GO:0005886; GO:0005615; GO:0032991; GO:0048471; GO:0045171; GO:0005739; GO:0005576; GO:0042581	OLFM4	380924	TRUE	-1.29547	0.000382062	0.0115196	chr14
ENSMUSG00000046668	ENSMUST00000235161; ENSMUST00000060722; ENSMUST00000237291; ENSMUST00000235169; ENSMUST00000235337; ENSMUST00000235404	Cxxc5	protein_coding	protein_coding	CXXC finger 5 [Source:MGI Symbol;Acc:MGI:1914643]	0.6114	1061	GO:0000122	GO:0008270; GO:0003677; GO:0043565; GO:0046872; GO:0140297; GO:0008327	GO:0005829; GO:0005654; GO:0005634; GO:0005737	CXXC5	67393	TRUE	0.168743	0.000382754	0.0115196	chr18
ENSMUSG00000022489	ENSMUST00000226468; ENSMUST00000023132; ENSMUST00000226493; ENSMUST00000227955; ENSMUST00000227925	Pde1b	protein_coding	protein_coding	phosphodiesterase 1B, Ca2+-calmodulin dependent [Source:MGI Symbol;Acc:MGI:97523]	0.5361	2478	GO:0007165; GO:0097011; GO:0007626; GO:0008542; GO:0001975; GO:0036006; GO:0001505; GO:0042428; GO:0042053; GO:0030224	GO:0046872; GO:0016787; GO:0005516; GO:0008081; GO:0004114; GO:0004115; GO:0047555; GO:0004112; GO:0004117; GO:0048101	GO:0005829; GO:0005737; GO:0043025	PDE1B	18574	TRUE	0.252229	0.000385517	0.011579	chr15
ENSMUSG00000047976	ENSMUST00000055168; ENSMUST00000203094; ENSMUST00000205171	Kcna1	protein_coding	protein_coding	potassium voltage-gated channel, shaker-related subfamily, member 1 [Source:MGI Symbol;Acc:MGI:96654]	0.561	2642	GO:0055085; GO:0006811; GO:0051260; GO:0006813; GO:0060078; GO:0034765; GO:0071805; GO:0008104; GO:1903818; GO:0007420; GO:0042391; GO:0071286; GO:0019228; GO:0050966; GO:0099505; GO:0007405; GO:0006937; GO:0010960; GO:0021766; GO:0050905; GO:0050976; GO:0023041; GO:0001964; GO:0010644; GO:0021554; GO:0021987; GO:0022038; GO:0061564	GO:0005216; GO:0005515; GO:0005244; GO:0005249; GO:0005267; GO:0005251; GO:0099508; GO:0097718; GO:1905030	GO:0016020; GO:0005829; GO:0016021; GO:0030054; GO:0005886; GO:0110165; GO:0005783; GO:0043025; GO:0009986; GO:0031410; GO:0045202; GO:0070161; GO:0008076; GO:0016324; GO:0042995; GO:0030425; GO:0043204; GO:0030424; GO:0005887; GO:0098793; GO:0098978; GO:0033270; GO:0099056; GO:0099055; GO:0043194; GO:0042734; GO:0043679; GO:0034705; GO:0044305; GO:0044224	KCNA1	16485	TRUE	-0.307359	0.000390611	0.0116978	chr6
ENSMUSG00000030522	ENSMUST00000206732; ENSMUST00000032736; ENSMUST00000206452; ENSMUST00000206680	Mtmr10	protein_coding	protein_coding	myotubularin related protein 10 [Source:MGI Symbol;Acc:MGI:2142292]	0.4628	2861	GO:0046856	GO:0004438	GO:0005737	MTMR10	233315	TRUE	-0.217272	0.000391073	0.0116978	chr7
ENSMUSG00000020265	ENSMUST00000020501; ENSMUST00000137841; ENSMUST00000129492; ENSMUST00000141228; ENSMUST00000099538; ENSMUST00000173691; ENSMUST00000124024; ENSMUST00000174295	Sumo3	protein_coding	protein_coding	small ubiquitin-like modifier 3 [Source:MGI Symbol;Acc:MGI:1336201]	0.5107	1053	GO:0043392; GO:0016925; GO:0034504; GO:2000060; GO:1900180	GO:0005515; GO:0031386; GO:0044389; GO:0019789	GO:0005634; GO:0016604; GO:0005737; GO:0016605; GO:0005654	SUMO3	20610	TRUE	0.169581	0.000395931	0.011819	chr10
ENSMUSG00000008167	ENSMUST00000095220; ENSMUST00000139721; ENSMUST00000145479; ENSMUST00000152884; ENSMUST00000142036; ENSMUST00000125109; ENSMUST00000143763; ENSMUST00000151962; ENSMUST00000141183	Fbxw9	protein_coding	protein_coding	F-box and WD-40 domain protein 9 [Source:MGI Symbol;Acc:MGI:1915878]	0.5651	1294		GO:0005515		FBXW9	68628	TRUE	0.353891	0.00039767	0.0118467	chr8
ENSMUSG00000019235	ENSMUST00000221972; ENSMUST00000222232; ENSMUST00000019379; ENSMUST00000223399	Rps6kl1	protein_coding	protein_coding	ribosomal protein S6 kinase-like 1 [Source:MGI Symbol;Acc:MGI:2443413]	0.5758	2084	GO:0006468; GO:0016310	GO:0005524; GO:0004672; GO:0016740; GO:0000166; GO:0016301; GO:0004674; GO:0106310	GO:0005840; GO:1990904	RPS6KL1	238323	TRUE	0.21802	0.000408764	0.0121524	chr12
ENSMUSG00000000753	ENSMUST00000000769; ENSMUST00000168902; ENSMUST00000167281; ENSMUST00000138661; ENSMUST00000139403; ENSMUST00000137103; ENSMUST00000125982; ENSMUST00000155009	Serpinf1	protein_coding	protein_coding	serine (or cysteine) peptidase inhibitor, clade F, member 1 [Source:MGI Symbol;Acc:MGI:108080]	0.5697	828	GO:0010629; GO:0010976; GO:0050769; GO:0016525; GO:0050728; GO:0014070; GO:0010951; GO:1901215; GO:0010596; GO:0007614; GO:0060767; GO:0060770; GO:0001822; GO:0007568; GO:0010447; GO:0042698; GO:0046685; GO:0060041; GO:0071279; GO:0071300; GO:0071333; GO:0071549; GO:1901652	GO:0004867	GO:0030424; GO:0005615; GO:0048471; GO:0005576; GO:0043025; GO:0042470; GO:0005604; GO:0043203	SERPINF1	20317	TRUE	0.482605	0.000409992	0.0121642	chr11
ENSMUSG00000036578	ENSMUST00000206341; ENSMUST00000073892	Fxyd7	protein_coding	protein_coding	FXYD domain-containing ion transport regulator 7 [Source:MGI Symbol;Acc:MGI:1889006]	0.5879	656	GO:0043269; GO:0006811	GO:0099106; GO:0051117	GO:0016020; GO:0016021	FXYD7	57780	TRUE	0.290516	0.000413706	0.0122475	chr7
ENSMUSG00000007122	ENSMUST00000003554; ENSMUST00000170638; ENSMUST00000170700	Casq1	protein_coding	protein_coding	calsequestrin 1 [Source:MGI Symbol;Acc:MGI:1309468]	0.5221	1110	GO:0009408; GO:0010880; GO:0051258; GO:0006937; GO:0051281; GO:0007029; GO:0045214; GO:0051279; GO:0007519; GO:0010033; GO:0014809; GO:0014870; GO:0014894; GO:0051282; GO:1901341; GO:2001256	GO:0005509; GO:0046872; GO:0042802	GO:0005739; GO:0005737; GO:0016020; GO:0005783; GO:0005794; GO:0043231; GO:0042383; GO:0016529; GO:0005759; GO:0033017; GO:0030018; GO:0030016; GO:0030315; GO:0031674; GO:0033018; GO:0014802; GO:0014804	CASQ1	12372	TRUE	-0.748989	0.000414474	0.0122475	chr1
ENSMUSG00000045409	ENSMUST00000173665; ENSMUST00000113706; ENSMUST00000042717; ENSMUST00000173369; ENSMUST00000174197; ENSMUST00000113704; ENSMUST00000172832	Trim39	protein_coding	protein_coding	tripartite motif-containing 39 [Source:MGI Symbol;Acc:MGI:1890659]	0.5077	2713	GO:0007095; GO:0032435; GO:0043124; GO:0050821; GO:1902806; GO:2000059; GO:2001235	GO:0008270; GO:0005515; GO:0046872; GO:0042802	GO:0005634; GO:0005739; GO:0005829	TRIM39	79263	TRUE	-0.230634	0.000415417	0.0122506	chr17
ENSMUSG00000044164	ENSMUST00000059986; ENSMUST00000161817	Rnf182	protein_coding	protein_coding	ring finger protein 182 [Source:MGI Symbol;Acc:MGI:3045355]	0.5022	2000	GO:0016567	GO:0016740; GO:0046872; GO:0004842	GO:0005737; GO:0016020; GO:0016021	RNF182	328234	TRUE	-0.239249	0.000417621	0.0122908	chr13
ENSMUSG00000075334	ENSMUST00000100089	Rprm	protein_coding	protein_coding	reprimo, TP53 dependent G2 arrest mediator candidate [Source:MGI Symbol;Acc:MGI:1915124]	0.5616	1460	GO:0051726; GO:0007346	GO:0003674	GO:0005737; GO:0016020; GO:0016021	RPRM	67874	TRUE	-0.710221	0.000418942	0.012305	chr2
ENSMUSG00000037104	ENSMUST00000041369; ENSMUST00000234803; ENSMUST00000234421	Socs5	protein_coding	protein_coding	suppressor of cytokine signaling 5 [Source:MGI Symbol;Acc:MGI:2385459]	0.5185	2548	GO:0016567; GO:0009968; GO:0035556; GO:0019221; GO:0046854; GO:0043551; GO:0007173; GO:0032436; GO:0007259; GO:0007175; GO:0032715; GO:0045627; GO:0045629; GO:0050728; GO:0071404; GO:0071638; GO:0097699; GO:1904988	GO:0005515; GO:0030971; GO:0046935; GO:0005154; GO:0019210	GO:0005737; GO:0005942	SOCS5	56468	TRUE	-0.113236	0.000422277	0.0123679	chr17
ENSMUSG00000024781	ENSMUST00000178114; ENSMUST00000049572; ENSMUST00000236641; ENSMUST00000237497; ENSMUST00000237617; ENSMUST00000237513	Lipa	protein_coding	protein_coding	lysosomal acid lipase A [Source:MGI Symbol;Acc:MGI:96789]	0.4355	2073	GO:0030324; GO:0048771; GO:0006954; GO:0000902; GO:0050673; GO:0048873; GO:0006629; GO:0016042; GO:0006631; GO:0016125; GO:0061519	GO:0016787; GO:0016788; GO:0004771; GO:0016298	GO:0005829; GO:0005654; GO:0043231; GO:0005764; GO:0001650	LIPA	16889	TRUE	-0.245388	0.000422778	0.0123679	chr19
ENSMUSG00000022715	ENSMUST00000023400	Tmem114	protein_coding	protein_coding	transmembrane protein 114 [Source:MGI Symbol;Acc:MGI:1921970]	0.6119	1407	GO:0008150	GO:0003674	GO:0016021; GO:0016020; GO:0005886; GO:0016324; GO:0016327	TMEM114	74720	TRUE	0.905784	0.000429949	0.0125526	chr16
ENSMUSG00000030525	ENSMUST00000032738; ENSMUST00000208304	Chrna7	protein_coding	protein_coding	cholinergic receptor, nicotinic, alpha polypeptide 7 [Source:MGI Symbol;Acc:MGI:99779]	0.4838	2446	GO:0006811; GO:0010628; GO:0050728; GO:0034220; GO:0060078; GO:0060079; GO:0030317; GO:0051649; GO:0007165; GO:0007268; GO:0042391; GO:0050877; GO:0051899; GO:0070373; GO:0007613; GO:0070374; GO:0032715; GO:0007271; GO:0045471; GO:0006816; GO:0019228; GO:0006897; GO:0032094; GO:0007611; GO:0032691; GO:0032720; GO:0008306; GO:0042113; GO:0042110; GO:0035094; GO:0035095; GO:0095500; GO:1905144; GO:…	GO:0005230; GO:0005515; GO:0004888; GO:0005216; GO:0022848; GO:0042803; GO:0005231; GO:0030594; GO:1904315; GO:0019901; GO:0051117; GO:0015643; GO:0001540; GO:0008179; GO:0097110; GO:0015464; GO:0042166; GO:0017081	GO:0016021; GO:0014069; GO:0005737; GO:0030424; GO:0016020; GO:0005886; GO:0009897; GO:0110165; GO:0005887; GO:0045202; GO:0045211; GO:0070161; GO:0016324; GO:0044853; GO:0030426; GO:0043025; GO:0043198; GO:0043005; GO:0005892; GO:0098981; GO:0099060; GO:0030425; GO:0043197; GO:0045121; GO:0032279; GO:0099056; GO:0099055; GO:0042734; GO:0030673; GO:0098690; GO:0098793; GO:0099065	CHRFAM7A,CHRNA7	11441	TRUE	-0.440687	0.000432106	0.0125905	chr7
ENSMUSG00000021983	ENSMUST00000080368; ENSMUST00000145071; ENSMUST00000131670; ENSMUST00000140924; ENSMUST00000149414; ENSMUST00000152688	Atp8a2	protein_coding	protein_coding	ATPase, aminophospholipid transporter-like, class I, type 8A, member 2 [Source:MGI Symbol;Acc:MGI:1354710]	0.5208	2874	GO:0043588; GO:0007568; GO:0006869; GO:0015914; GO:0031175; GO:0040018; GO:0010976; GO:0045332; GO:0050884; GO:0007409; GO:0048666; GO:0042755; GO:0010996; GO:0010842; GO:0061092; GO:0042472; GO:0140331; GO:0003011; GO:0050908; GO:0060052	GO:0005524; GO:0046872; GO:0000166; GO:0000287; GO:0016887; GO:0140326; GO:0090555; GO:0090556; GO:0140346; GO:0015247	GO:0005654; GO:0016020; GO:0016021; GO:0000139; GO:0005794; GO:0005886; GO:0042995; GO:0005768; GO:0010008; GO:1990531	ATP8A2	50769	TRUE	-0.261383	0.000435796	0.0126727	chr14
ENSMUSG00000006390	ENSMUST00000006557; ENSMUST00000167636; ENSMUST00000102673; ENSMUST00000135162; ENSMUST00000129419; ENSMUST00000143140; ENSMUST00000067896	Elovl1	protein_coding	protein_coding	elongation of very long chain fatty acids (FEN1/Elo2, SUR4/Elo3, yeast)-like 1 [Source:MGI Symbol;Acc:MGI:1858959]	0.5352	1030	GO:0019367; GO:0042761; GO:0006629; GO:0006631; GO:0006633; GO:0008610; GO:0044249; GO:0044255; GO:0006636; GO:0061436; GO:0030148; GO:0046513; GO:0034625; GO:0034626; GO:0035338; GO:0006094	GO:0009922; GO:0016740; GO:0102756; GO:0102338; GO:0102337	GO:0016021; GO:0005783; GO:0016020; GO:0005789; GO:0030176	ELOVL1	54325	TRUE	-0.270593	0.000437949	0.0127101	chr4
ENSMUSG00000087166	ENSMUST00000152889; ENSMUST00000154279; ENSMUST00000171708; ENSMUST00000173659	L1td1	protein_coding	protein_coding	LINE-1 type transposase domain containing 1 [Source:MGI Symbol;Acc:MGI:3578435]	0.4859	1665	GO:0032197	GO:0003727	GO:0043231; GO:1990904	L1TD1	381591	TRUE	0.710381	0.000443226	0.0128262	chr4
ENSMUSG00000035189	ENSMUST00000182462; ENSMUST00000182341; ENSMUST00000182613; ENSMUST00000182790; ENSMUST00000182598; ENSMUST00000182888; ENSMUST00000182041; ENSMUST00000182419; ENSMUST00000183268; ENSMUST00000181976; ENSMUST00000182624; ENSMUST00000180843	Ano4	protein_coding	protein_coding	anoctamin 4 [Source:MGI Symbol;Acc:MGI:2443344]	0.4673	2126	GO:0061588; GO:0006869; GO:0051649; GO:0055085; GO:0061590; GO:0061591; GO:1902476; GO:0006821; GO:0061589	GO:0046983; GO:0005254; GO:0017128	GO:0016020; GO:0016021; GO:0005886	ANO4	320091	TRUE	-0.229959	0.000443706	0.0128262	chr10
ENSMUSG00000005360	ENSMUST00000005493; ENSMUST00000125997; ENSMUST00000128879; ENSMUST00000153455; ENSMUST00000157065; ENSMUST00000129325; ENSMUST00000133309; ENSMUST00000126747	Slc1a3	protein_coding	protein_coding	solute carrier family 1 (glial high affinity glutamate transporter), member 3 [Source:MGI Symbol;Acc:MGI:99917]	0.4603	1723	GO:0007605; GO:0009611; GO:0071805; GO:0006865; GO:0009410; GO:0006835; GO:0050885; GO:0021545; GO:0006883; GO:0046677; GO:0009416; GO:0015804; GO:0015813; GO:0098712; GO:0140009; GO:0050806; GO:0010035; GO:0070779; GO:1902476; GO:0043200; GO:0048667; GO:0071314; GO:0009449; GO:0051938; GO:0031223; GO:0043490; GO:0055085; GO:0015800; GO:0015807; GO:1902475	GO:0015293; GO:0005515; GO:0046872; GO:0008514; GO:0015172; GO:0015179; GO:0016597; GO:0005313; GO:0005314; GO:0015175; GO:0015501; GO:0016595	GO:0016021; GO:0045202; GO:0016020; GO:0005886; GO:0071944; GO:0009986; GO:0005743; GO:0043005; GO:0005887; GO:0043025; GO:0016323; GO:0043197; GO:0009925; GO:0042995; GO:0098796	SLC1A3	20512	TRUE	0.245702	0.000448272	0.0129327	chr15
ENSMUSG00000001467	ENSMUST00000001507; ENSMUST00000129448; ENSMUST00000151539; ENSMUST00000199909	Cyp51	protein_coding	protein_coding	cytochrome P450, family 51 [Source:MGI Symbol;Acc:MGI:106040]	0.4692	1483	GO:0006694; GO:0006629; GO:0008202; GO:0008203; GO:0006695; GO:0016126; GO:0016125; GO:1900222; GO:0042177; GO:0050709; GO:0060282; GO:0033488	GO:0004497; GO:0020037; GO:0005506; GO:0016705; GO:0046872; GO:0016491; GO:0008398	GO:0005737; GO:0016020; GO:0016021; GO:0005783; GO:0005789; GO:0043231; GO:0001669	CYP51A1	13121	TRUE	0.128035	0.000453065	0.013021	chr5
ENSMUSG00000019996	ENSMUST00000020173; ENSMUST00000116259; ENSMUST00000214231; ENSMUST00000214823; ENSMUST00000216909; ENSMUST00000217251; ENSMUST00000215924; ENSMUST00000216065; ENSMUST00000213386; ENSMUST00000213312; ENSMUST00000215812; ENSMUST00000216474; ENSMUST00000216308	Map7	protein_coding	protein_coding	microtubule-associated protein 7 [Source:MGI Symbol;Acc:MGI:1328328]	0.5307	1297	GO:0000226		GO:0015630; GO:0005829	MAP7	17761	TRUE	-0.247026	0.000453764	0.013021	chr10
ENSMUSG00000022894	ENSMUST00000023611	Adamts5	protein_coding	protein_coding	a disintegrin-like and metallopeptidase (reprolysin type) with thrombospondin type 1 motif, 5 (aggrecanase-2) [Source:MGI Symbol;Acc:MGI:1346321]	0.4374	10790	GO:0006508; GO:0042742; GO:0030198; GO:0120163; GO:0007520; GO:0022617; GO:0044691	GO:0004222; GO:0008270; GO:0046872; GO:0016787; GO:0008201; GO:0008233; GO:0008237; GO:0004175; GO:0050840	GO:0005615; GO:0005576; GO:0062023; GO:0031012	ADAMTS5	23794	TRUE	-0.604827	0.000454002	0.013021	chr16
ENSMUSG00000034755	ENSMUST00000113364; ENSMUST00000050239; ENSMUST00000192977; ENSMUST00000113358; ENSMUST00000195088; ENSMUST00000192677; ENSMUST00000193899; ENSMUST00000155223; ENSMUST00000191653	Pcdh11x	protein_coding	protein_coding	protocadherin 11 X-linked [Source:MGI Symbol;Acc:MGI:2442849]	0.4386	4630	GO:0007156; GO:0007155	GO:0005509; GO:0005515	GO:0016020; GO:0005886; GO:0016021; GO:0005887; GO:0061827; GO:0097225	PCDH11X,PCDH11Y	245578	TRUE	-0.390915	0.000456375	0.0130622	chrX
ENSMUSG00000026489	ENSMUST00000170472; ENSMUST00000027766; ENSMUST00000160879; ENSMUST00000161300; ENSMUST00000160169; ENSMUST00000162769; ENSMUST00000161632; ENSMUST00000159591; ENSMUST00000161379; ENSMUST00000160482; ENSMUST00000161814; ENSMUST00000162725; ENSMUST00000160121; ENSMUST00000159914; ENSMUST00000160102; ENSMUST00000161743; ENSMUST00000161746	Coq8a	protein_coding	protein_coding	coenzyme Q8A [Source:MGI Symbol;Acc:MGI:1914676]	0.5701	952	GO:0016310; GO:0006744	GO:0016740; GO:0000166; GO:0005524; GO:0016301; GO:0043531	GO:0005739; GO:0016020; GO:0016021; GO:0031314	COQ8A	67426	TRUE	0.197282	0.000457302	0.0130622	chr1
ENSMUSG00000025157	ENSMUST00000224258; ENSMUST00000026154; ENSMUST00000224896; ENSMUST00000224562; ENSMUST00000225968; ENSMUST00000224537; ENSMUST00000223785; ENSMUST00000225433; ENSMUST00000223768; ENSMUST00000223624; ENSMUST00000223802	Zdhhc16	protein_coding	protein_coding	zinc finger, DHHC domain containing 16 [Source:MGI Symbol;Acc:MGI:1921418]	0.5346	771	GO:0006974; GO:0001654; GO:0006915; GO:0018345; GO:0007507; GO:0021537	GO:0016409; GO:0019706; GO:0016740; GO:0016746; GO:0005515	GO:0016020; GO:0016021; GO:0005783; GO:0005789; GO:0005794	ZDHHC16	74168	TRUE	0.246089	0.000458182	0.0130622	chr19
ENSMUSG00000027495	ENSMUST00000028995	Fam210b	protein_coding	protein_coding	family with sequence similarity 210, member B [Source:MGI Symbol;Acc:MGI:1914267]	0.5018	3617	GO:0030154; GO:0043249; GO:0071392; GO:0045648	GO:0003674	GO:0016020; GO:0016021; GO:0005739; GO:0031224; GO:0005741	FAM210B	67017	TRUE	0.233993	0.000459014	0.0130622	chr2
ENSMUSG00000031492	ENSMUST00000060943; ENSMUST00000211104; ENSMUST00000079463	Chrnb3	protein_coding	protein_coding	cholinergic receptor, nicotinic, beta polypeptide 3 [Source:MGI Symbol;Acc:MGI:106212]	0.4546	3362	GO:0006811; GO:0034220; GO:0060078; GO:0060079; GO:0007165; GO:0007268; GO:0042391; GO:0050877; GO:2000300; GO:0007271; GO:0035094	GO:0005230; GO:0004888; GO:0005216; GO:0022848; GO:0005231; GO:0030594; GO:1904315; GO:1901363; GO:0015464; GO:0042166	GO:0016021; GO:0016020; GO:0005886; GO:0110165; GO:0032991; GO:0005887; GO:0045202; GO:0045211; GO:0043005; GO:0005892; GO:0098691; GO:0070161	CHRNB3	108043	TRUE	-1.40565	0.000461304	0.0130868	chr8
ENSMUSG00000038354	ENSMUST00000048427; ENSMUST00000122960; ENSMUST00000130429	Ankrd35	protein_coding	protein_coding	ankyrin repeat domain 35 [Source:MGI Symbol;Acc:MGI:2442590]	0.5709	2617	GO:0008150	GO:0005515; GO:0003674	GO:0005575	ANKRD35	213121	TRUE	0.295914	0.000461667	0.0130868	chr3
ENSMUSG00000038587	ENSMUST00000045730; ENSMUST00000239373; ENSMUST00000239220; ENSMUST00000216139; ENSMUST00000215696	Akap12	protein_coding	protein_coding	A kinase (PRKA) anchor protein (gravin) 12 [Source:MGI Symbol;Acc:MGI:1932576]	0.5123	4922	GO:0016310; GO:0007165; GO:0032760; GO:0070374; GO:0010739; GO:0090036; GO:0050804; GO:0007193; GO:0010738; GO:0032496; GO:0035733; GO:0043116; GO:0051602; GO:0051770; GO:0061870; GO:0071347; GO:0071356; GO:1900143	GO:0005516; GO:0016301; GO:0051018; GO:0008179; GO:0030159	GO:0005829; GO:0005737; GO:0016020; GO:0005886; GO:0110165; GO:0005856; GO:0043025; GO:0098685	AKAP12	83397	TRUE	0.162957	0.000470732	0.013318	chr10
ENSMUSG00000069808	ENSMUST00000129853; ENSMUST00000127340; ENSMUST00000094014; ENSMUST00000130527; ENSMUST00000169560	Tlcd3a	protein_coding	protein_coding	TLC domain containing 3A [Source:MGI Symbol;Acc:MGI:2151840]	0.5203	1949	GO:0055088	GO:0003674	GO:0016021; GO:0016020; GO:0005886; GO:0005783	TLCD3A	116972	TRUE	-0.279034	0.000474498	0.0133986	chr11
ENSMUSG00000030669	ENSMUST00000032906; ENSMUST00000205560; ENSMUST00000206156; ENSMUST00000032907; ENSMUST00000206853; ENSMUST00000205933; ENSMUST00000205714	Calca	protein_coding	protein_coding	calcitonin/calcitonin-related polypeptide, alpha [Source:MGI Symbol;Acc:MGI:2151253]	0.5336	627	GO:0006954; GO:0001503; GO:0007165; GO:0009408; GO:0007189; GO:0008016; GO:0006874; GO:1990090; GO:0050965; GO:0051480; GO:0048240; GO:0007631; GO:0042311; GO:0045776; GO:0030279; GO:0007218; GO:0048265; GO:0007190; GO:0006939; GO:0045986; GO:0001976; GO:0001984; GO:0002548; GO:0007204; GO:0007566; GO:0007568; GO:0032147; GO:0045779; GO:0045892; GO:0051482; GO:0071356	GO:0005179; GO:0044877; GO:0005102; GO:0042802; GO:0031716	GO:0005576; GO:0005634; GO:0005737; GO:0030424; GO:0005615; GO:0043005; GO:0043025; GO:0043195	CALCA,CALCB	12310	TRUE	0.825126	0.000476626	0.0134328	chr7
ENSMUSG00000093930	ENSMUST00000225543; ENSMUST00000179869; ENSMUST00000226092; ENSMUST00000224188	Hmgcs1	protein_coding	protein_coding	3-hydroxy-3-methylglutaryl-Coenzyme A synthase 1 [Source:MGI Symbol;Acc:MGI:107592]	0.456	2203	GO:0008299; GO:0006084; GO:0010142; GO:0006629; GO:0008202; GO:0008203; GO:0006694; GO:0006695; GO:0016126; GO:0071404; GO:0014074	GO:0004421; GO:0016740; GO:0036094; GO:0042803; GO:0016746; GO:0016853; GO:0043177	GO:0005829; GO:0005737	HMGCS1	208715	TRUE	0.201464	0.000485826	0.0136459	chr13
ENSMUSG00000004894	ENSMUST00000160737; ENSMUST00000005014; ENSMUST00000162352; ENSMUST00000160150	Hapln2	protein_coding	protein_coding	hyaluronan and proteoglycan link protein 2 [Source:MGI Symbol;Acc:MGI:2137300]	0.6132	1307	GO:0007155; GO:0007417; GO:0001501; GO:0008065; GO:0085029	GO:0005540	GO:0005576; GO:0031012; GO:0033268	HAPLN2	73940	TRUE	-0.313373	0.000486054	0.0136459	chr3
ENSMUSG00000024645	ENSMUST00000025547; ENSMUST00000235548; ENSMUST00000235640; ENSMUST00000236812; ENSMUST00000235629; ENSMUST00000237949; ENSMUST00000235745; ENSMUST00000235591	Timm21	protein_coding	protein_coding	translocase of inner mitochondrial membrane 21 [Source:MGI Symbol;Acc:MGI:1920595]	0.4223	1426	GO:0030150; GO:0015031; GO:0032981; GO:0033617	GO:0003674	GO:0005744; GO:0005739; GO:0016020; GO:0016021; GO:0031966	TIMM21	67105	TRUE	-0.353354	0.000493526	0.0138291	chr18
ENSMUSG00000022206	ENSMUST00000066529; ENSMUST00000226139; ENSMUST00000228603; ENSMUST00000228489; ENSMUST00000226878	Npr3	protein_coding	protein_coding	natriuretic peptide receptor 3 [Source:MGI Symbol;Acc:MGI:97373]	0.4783	3524	GO:0008217; GO:0007165; GO:0001501; GO:0120163; GO:0048015; GO:0007200; GO:0007193; GO:0007194; GO:0042311; GO:0048662; GO:0030157; GO:0051000; GO:0035810; GO:0002158; GO:0033688	GO:0042802; GO:0042803; GO:0038023; GO:0016941; GO:0042277; GO:0042562; GO:0031404; GO:0017046; GO:0008528	GO:0016021; GO:0016020; GO:0005886; GO:0032991	NPR3	18162	TRUE	-0.926409	0.00049484	0.0138394	chr15
ENSMUSG00000047617	ENSMUST00000132596; ENSMUST00000133919; ENSMUST00000132561; ENSMUST00000114261; ENSMUST00000135915; ENSMUST00000141613; ENSMUST00000130130; ENSMUST00000125710; ENSMUST00000124172; ENSMUST00000151239; ENSMUST00000138079; ENSMUST00000128560; ENSMUST00000123986	Paxx	protein_coding	protein_coding	non-homologous end joining factor [Source:MGI Symbol;Acc:MGI:2442831]	0.5757	786	GO:0006303; GO:0006281; GO:0006974	GO:0042802; GO:0042803; GO:0060090; GO:0070182	GO:0005634; GO:0005654; GO:0005694; GO:0035861; GO:0043564; GO:0070419	PAXX	227622	TRUE	0.298314	0.000496079	0.0138476	chr2
ENSMUSG00000037470	ENSMUST00000046875; ENSMUST00000173999; ENSMUST00000174266; ENSMUST00000173250; ENSMUST00000174224; ENSMUST00000173166; ENSMUST00000173082; ENSMUST00000174716; ENSMUST00000174142; ENSMUST00000172592; ENSMUST00000192159	Uggt1	protein_coding	protein_coding	UDP-glucose glycoprotein glucosyltransferase 1 [Source:MGI Symbol;Acc:MGI:2443162]	0.4762	2417	GO:0006486; GO:0071704; GO:0018279; GO:0071712; GO:0097359	GO:0003980; GO:0016740; GO:0016757; GO:0005515; GO:0051082	GO:0005783; GO:0032991; GO:0005788; GO:0005793	UGGT1	320011	TRUE	-0.138923	0.000498263	0.0138713	chr1
ENSMUSG00000053565	ENSMUST00000066070; ENSMUST00000207683; ENSMUST00000208616; ENSMUST00000208810; ENSMUST00000207762; ENSMUST00000208707	Eif3k	protein_coding	protein_coding	eukaryotic translation initiation factor 3, subunit K [Source:MGI Symbol;Acc:MGI:1921080]	0.5423	871	GO:0006412; GO:0006413; GO:0006446; GO:0001732; GO:0002183	GO:0003743; GO:0003723; GO:0043022	GO:0005737; GO:0005852; GO:0005829; GO:0005634; GO:0016282; GO:0033290	EIF3K	73830	TRUE	0.181773	0.000498823	0.0138713	chr7
ENSMUSG00000033943	ENSMUST00000046717; ENSMUST00000079934; ENSMUST00000110774; ENSMUST00000110773; ENSMUST00000141776; ENSMUST00000129405; ENSMUST00000156510; ENSMUST00000150742; ENSMUST00000132054; ENSMUST00000156074; ENSMUST00000152148; ENSMUST00000138851; ENSMUST00000151074; ENSMUST00000122889; ENSMUST00000131396	Mga	protein_coding	protein_coding	MAX gene associated [Source:MGI Symbol;Acc:MGI:1352483]	0.4449	4936	GO:0006355; GO:0045893; GO:1990830; GO:0006357; GO:0045944; GO:0001708	GO:0003700; GO:0046983; GO:0003677; GO:0000978; GO:0000981; GO:0001228; GO:0000977	GO:0005634; GO:0071339; GO:0005667	MGA	29808	TRUE	-0.222497	0.00050005	0.0138769	chr2
ENSMUSG00000028833	ENSMUST00000030637; ENSMUST00000106116; ENSMUST00000127079	Ncdn	protein_coding	protein_coding	neurochondrin [Source:MGI Symbol;Acc:MGI:1347351]	0.6072	2830	GO:0031175; GO:0045453; GO:0048168	GO:0005515	GO:0005829; GO:0005737; GO:0016020; GO:0045202; GO:0042995; GO:0030425; GO:0043005; GO:0010008; GO:0043025; GO:0005768; GO:0043204; GO:0098794	NCDN	26562	TRUE	0.196703	0.000500923	0.0138769	chr4
ENSMUSG00000024998	ENSMUST00000181994; ENSMUST00000182481; ENSMUST00000169713; ENSMUST00000182267; ENSMUST00000182999; ENSMUST00000182589; ENSMUST00000183131	Plce1	protein_coding	protein_coding	phospholipase C, epsilon 1 [Source:MGI Symbol;Acc:MGI:1921305]	0.4853	5302	GO:0007165; GO:0035556; GO:0006629; GO:0007264; GO:0010592; GO:0045859; GO:0007186; GO:0016042; GO:0007265; GO:0043410; GO:0048015; GO:0008277; GO:0007200; GO:0007173; GO:0032835; GO:0006651; GO:0046578	GO:0005085; GO:0004435; GO:0046872; GO:0016787; GO:0005515; GO:0008081; GO:0031267; GO:0019899; GO:0004629	GO:0005829; GO:0005737; GO:0016020; GO:0000139; GO:0005794; GO:0005886; GO:0042995; GO:0030027	PLCE1	74055	TRUE	-0.293964	0.00050815	0.0140505	chr19
ENSMUSG00000009894	ENSMUST00000010038; ENSMUST00000120940; ENSMUST00000156146; ENSMUST00000136436; ENSMUST00000132969; ENSMUST00000145550; ENSMUST00000150297; ENSMUST00000125846	Snap47	protein_coding	protein_coding	synaptosomal-associated protein, 47 [Source:MGI Symbol;Acc:MGI:1915076]	0.5234	804	GO:0060291; GO:0006887; GO:0006906; GO:0099003; GO:0016082; GO:0031629; GO:0098967	GO:0005484; GO:0019905	GO:0014069; GO:0005737; GO:0016020; GO:0005886; GO:0012505; GO:0043025; GO:0048471; GO:0030425; GO:0098978; GO:0031201; GO:0032279; GO:0030672; GO:0031083; GO:0098686	SNAP47	67826	TRUE	0.10068	0.000511017	0.0141031	chr11
ENSMUSG00000051136	ENSMUST00000057186	Ghsr	protein_coding	protein_coding	growth hormone secretagogue receptor [Source:MGI Symbol;Acc:MGI:2441906]	0.4575	4433	GO:0007186; GO:0050728; GO:0007165; GO:0050896; GO:0007154; GO:0023052; GO:0009725; GO:0008154; GO:0032715; GO:0046676; GO:0099175; GO:0040018; GO:0060123; GO:0032094; GO:0098696; GO:0032099; GO:0007611; GO:0032691; GO:0032720; GO:0051963; GO:0032869; GO:1903672; GO:0046697; GO:1905564; GO:0043568; GO:0048009; GO:1904349; GO:0009755; GO:0045927; GO:0030252; GO:0010700; GO:1904000; GO:0008343; GO:…	GO:0004930; GO:0042802; GO:0042562; GO:0017046; GO:0016520; GO:0001616	GO:0016021; GO:0016020; GO:0005886; GO:0009986; GO:0045121; GO:0043005; GO:0098978; GO:0098794; GO:0098685; GO:0099699	GHSR	208188	TRUE	-1.43886	0.000521503	0.0143654	chr3
ENSMUSG00000027833	ENSMUST00000162098; ENSMUST00000029422; ENSMUST00000162060; ENSMUST00000162439; ENSMUST00000195261	Shox2	protein_coding	protein_coding	short stature homeobox 2 [Source:MGI Symbol;Acc:MGI:1201673]	0.5238	1751	GO:0006355; GO:0006357; GO:2000648; GO:0072089; GO:0001649; GO:0000122; GO:0002062; GO:0007224; GO:0045880; GO:0002027; GO:0003209; GO:0035115; GO:0003170; GO:0048557; GO:0030326; GO:0002063; GO:0002053; GO:0060351; GO:0010463; GO:0048598; GO:0060272; GO:0032330; GO:0060931; GO:0003163; GO:0003172; GO:0003213; GO:0048743; GO:0050772; GO:0060415; GO:0060920; GO:2000172	GO:0003677; GO:0000981; GO:0001227; GO:1990837; GO:0043565	GO:0005634	SHOX2	20429	TRUE	0.36436	0.000524815	0.0144294	chr3
ENSMUSG00000028309	ENSMUST00000140341; ENSMUST00000156314; ENSMUST00000167496; ENSMUST00000029989; ENSMUST00000146547; ENSMUST00000132782; ENSMUST00000126675; ENSMUST00000149862; ENSMUST00000131962; ENSMUST00000138490	Rnf20	protein_coding	protein_coding	ring finger protein 20 [Source:MGI Symbol;Acc:MGI:1925927]	0.4725	1835	GO:0016567; GO:0006325; GO:0010390; GO:0000209; GO:0045893; GO:0006355; GO:0031401; GO:0030336; GO:0006511; GO:0031062; GO:0016574; GO:0033523; GO:0071894	GO:0016740; GO:0046872; GO:0004842; GO:0003730; GO:0005515; GO:0003682; GO:0042393; GO:0042802; GO:0061630; GO:0002039; GO:0003713; GO:0031625	GO:0005634; GO:0005730; GO:0005654; GO:0000151; GO:0033503	RNF20	109331	TRUE	-0.142948	0.000526073	0.0144369	chr4
ENSMUSG00000006782	ENSMUST00000103120; ENSMUST00000148034; ENSMUST00000150414; ENSMUST00000147403	Cnp	protein_coding	protein_coding	2',3'-cyclic nucleotide 3' phosphodiesterase [Source:MGI Symbol;Acc:MGI:88437]	0.5456	1800	GO:0009214; GO:0008344; GO:0048709; GO:0000226; GO:0007409; GO:0009636; GO:0046902; GO:0007568; GO:0030900; GO:0032496	GO:0004113; GO:0016787; GO:0003723; GO:0030551	GO:0016020; GO:0005737; GO:0005886; GO:0005615; GO:0048471; GO:0005743; GO:0042470; GO:0005902; GO:0043209; GO:0005874; GO:0031143; GO:0042995; GO:0005741; GO:0035748; GO:0035749	CNP	12799	TRUE	-0.177881	0.000529954	0.0145162	chr11
ENSMUSG00000041642	ENSMUST00000075164; ENSMUST00000130864; ENSMUST00000122892; ENSMUST00000171381; ENSMUST00000127624; ENSMUST00000165333	Kif21b	protein_coding	protein_coding	kinesin family member 21B [Source:MGI Symbol;Acc:MGI:109234]	0.5562	4010	GO:0007018	GO:0005515; GO:0005524; GO:0003777; GO:0008017; GO:0000166; GO:0003774	GO:0005856	KIF21B	16565	TRUE	-0.153084	0.000537344	0.0146911	chr1
ENSMUSG00000027577	ENSMUST00000108851; ENSMUST00000198922; ENSMUST00000067120; ENSMUST00000135766; ENSMUST00000124400	Chrna4	protein_coding	protein_coding	cholinergic receptor, nicotinic, alpha polypeptide 4 [Source:MGI Symbol;Acc:MGI:87888]	0.561	1646	GO:0006811; GO:0034220; GO:0060078; GO:0060079; GO:0007271; GO:0001666; GO:0006281; GO:0006979; GO:0007165; GO:0035094; GO:0035095; GO:0050877; GO:0050890; GO:0007626; GO:0007268; GO:0042391; GO:0051899; GO:0006816; GO:2000300; GO:0019233; GO:0019228; GO:0060080; GO:0007585; GO:0042113; GO:0014059; GO:0035640; GO:0095500; GO:1903048; GO:1905144	GO:0005230; GO:0004888; GO:0005216; GO:0022848; GO:0015464; GO:0005515; GO:0044877; GO:0005231; GO:0030594; GO:1904315; GO:1901363; GO:0042166; GO:0050997	GO:0016021; GO:0016020; GO:0005886; GO:0110165; GO:0045202; GO:0045211; GO:0070161; GO:0005892; GO:0009897; GO:0032991; GO:0005887; GO:0043025; GO:0043005; GO:0098981; GO:0099060; GO:0030425; GO:0099056; GO:0098691	CHRNA4	11438	TRUE	0.253979	0.000544795	0.0148529	chr2
ENSMUSG00000032360	ENSMUST00000063140; ENSMUST00000184757; ENSMUST00000184200	Hcrtr2	protein_coding	protein_coding	hypocretin (orexin) receptor 2 [Source:MGI Symbol;Acc:MGI:2680765]	0.435	2546	GO:0007186; GO:0007631; GO:0022410; GO:0007165; GO:0051480; GO:0007218; GO:0007200; GO:0010840; GO:0040011	GO:0004930; GO:0016499; GO:0005515; GO:0017046	GO:0016021; GO:0016020; GO:0005886; GO:0005887	HCRTR2	387285	TRUE	-0.958084	0.000545295	0.0148529	chr9
ENSMUSG00000029683	ENSMUST00000031694	Lmod2	protein_coding	protein_coding	leiomodin 2 (cardiac) [Source:MGI Symbol;Acc:MGI:2135672]	0.4863	1976	GO:0051694; GO:0045214; GO:0007015; GO:0006936; GO:0030041; GO:0030239; GO:0045010; GO:0030838	GO:0005523; GO:0003779; GO:0003785	GO:0005737; GO:0005856; GO:0030017; GO:0030016; GO:0031430; GO:0097512; GO:0005884; GO:0005865	LMOD2	93677	TRUE	0.916448	0.000547078	0.0148738	chr6
ENSMUSG00000060012	ENSMUST00000224126; ENSMUST00000100473; ENSMUST00000224507; ENSMUST00000231130; ENSMUST00000224503; ENSMUST00000224677	Kif13b	protein_coding	protein_coding	kinesin family member 13B [Source:MGI Symbol;Acc:MGI:1098265]	0.4854	3420	GO:0007018; GO:0050770	GO:0005524; GO:0003777; GO:0008017; GO:0000166; GO:0016887; GO:0003774; GO:0019901; GO:0071889; GO:0005515	GO:0005829; GO:0005737; GO:0030424; GO:0005874; GO:0005871; GO:0005902; GO:0033270	KIF13B	16554	TRUE	-0.203679	0.000550845	0.014899	chr14
ENSMUSG00000030556	ENSMUST00000053950; ENSMUST00000187953; ENSMUST00000190115; ENSMUST00000191035; ENSMUST00000185818; ENSMUST00000190770; ENSMUST00000191062; ENSMUST00000188971; ENSMUST00000190276; ENSMUST00000032775; ENSMUST00000191386; ENSMUST00000189836	Lrrc28	protein_coding	protein_coding	leucine rich repeat containing 28 [Source:MGI Symbol;Acc:MGI:1915689]	0.4851	1431		GO:0005515; GO:0003674	GO:0005575	LRRC28	67867	TRUE	-0.217394	0.000550998	0.014899	chr7
ENSMUSG00000030064	ENSMUST00000113355; ENSMUST00000203486; ENSMUST00000143698; ENSMUST00000113359; ENSMUST00000032146; ENSMUST00000146191; ENSMUST00000155326; ENSMUST00000138301; ENSMUST00000152385; ENSMUST00000113353; ENSMUST00000142589; ENSMUST00000126899; ENSMUST00000124050	Frmd4b	protein_coding	protein_coding	FERM domain containing 4B [Source:MGI Symbol;Acc:MGI:2141794]	0.4854	2378	GO:0090162	GO:0005515	GO:0005856; GO:0005737; GO:0070161; GO:0005923; GO:0005912; GO:0001726	FRMD4B	232288	TRUE	-0.223227	0.000551059	0.014899	chr6
ENSMUSG00000034761	ENSMUST00000110567; ENSMUST00000153712; ENSMUST00000110570; ENSMUST00000171211; ENSMUST00000049239; ENSMUST00000126584; ENSMUST00000153550; ENSMUST00000124715; ENSMUST00000133688; ENSMUST00000147451	Map4k5	protein_coding	protein_coding	mitogen-activated protein kinase kinase kinase kinase 5 [Source:MGI Symbol;Acc:MGI:1925503]	0.447	3072	GO:0006468; GO:0016310; GO:0035556; GO:0000165	GO:0005524; GO:0004672; GO:0016740; GO:0000166; GO:0016301; GO:0004674; GO:0106310; GO:0008349	GO:0005737	MAP4K5	399510	TRUE	-0.256233	0.00056489	0.0152447	chr12
ENSMUSG00000022762	ENSMUST00000037785; ENSMUST00000067602; ENSMUST00000231687; ENSMUST00000232550	Ncam2	protein_coding	protein_coding	neural cell adhesion molecule 2 [Source:MGI Symbol;Acc:MGI:97282]	0.377	3836	GO:0007155; GO:0007413; GO:0007608	GO:0005515; GO:0042802	GO:0030424; GO:0016604; GO:0016020; GO:0016021; GO:0005886; GO:0031225; GO:0043005	NCAM2	17968	TRUE	-0.401502	0.000566002	0.0152466	chr16
ENSMUSG00000038807	ENSMUST00000102521; ENSMUST00000123440; ENSMUST00000238457; ENSMUST00000047488; ENSMUST00000208896; ENSMUST00000145524	Rap1gap2	protein_coding	protein_coding	RAP1 GTPase activating protein 2 [Source:MGI Symbol;Acc:MGI:3028623]	0.5642	4278	GO:0051056; GO:0008361; GO:0010977; GO:0090630; GO:0050790	GO:0005096	GO:0005829; GO:0005737; GO:0005886; GO:0043005; GO:0031965; GO:0005813	RAP1GAP2	380711	TRUE	0.174608	0.000576267	0.0154946	chr11
ENSMUSG00000027423	ENSMUST00000028909; ENSMUST00000110030; ENSMUST00000138745; ENSMUST00000125285; ENSMUST00000156936; ENSMUST00000124389; ENSMUST00000153033; ENSMUST00000155509	Snx5	protein_coding	protein_coding	sorting nexin 5 [Source:MGI Symbol;Acc:MGI:1916428]	0.4491	1029	GO:0015031; GO:0006886; GO:0045893; GO:0006897; GO:0042147; GO:0046628; GO:0045776; GO:0006907; GO:0035815; GO:0007174	GO:0035091; GO:0005515; GO:0008289; GO:0010314; GO:0070273; GO:0080025; GO:0034452; GO:0031748	GO:0005829; GO:0005737; GO:0016020; GO:0005886; GO:0048471; GO:0031410; GO:0043231; GO:0030659; GO:0042995; GO:0031901; GO:0005768; GO:0005769; GO:0001726; GO:0005903; GO:0001891; GO:0030904; GO:0031234; GO:0031313; GO:0097422; GO:0070685	SNX5	69178	TRUE	-0.179484	0.000579112	0.0155425	chr2
ENSMUSG00000013089	ENSMUST00000079601; ENSMUST00000168774; ENSMUST00000170803; ENSMUST00000165506; ENSMUST00000170393	Etv5	protein_coding	protein_coding	ets variant 5 [Source:MGI Symbol;Acc:MGI:1096867]	0.5326	1802	GO:0006355; GO:0045944; GO:0000122; GO:0045666; GO:0007626; GO:0006357; GO:0045893; GO:0030154; GO:0034599; GO:0050807; GO:0071340; GO:0007274; GO:0060252; GO:0060762; GO:0048133	GO:0003700; GO:0043565; GO:0000976; GO:0003677; GO:0000981; GO:0000977; GO:0001228; GO:1990837	GO:0005634; GO:0005654; GO:0045202; GO:0005886	ETV5	104156	TRUE	-0.231887	0.000582678	0.0156096	chr16
ENSMUSG00000068037	ENSMUST00000089015; ENSMUST00000165020; ENSMUST00000167152; ENSMUST00000162333; ENSMUST00000161747; ENSMUST00000233607; ENSMUST00000162119; ENSMUST00000162389; ENSMUST00000159223; ENSMUST00000159865	Mas1	protein_coding	protein_coding	MAS1 oncogene [Source:MGI Symbol;Acc:MGI:96918]	0.5125	1320	GO:0007186; GO:0008284; GO:0007283; GO:0001933; GO:0007165; GO:0038166; GO:0045740; GO:0070528; GO:0060732; GO:0050727; GO:0007250; GO:0008584; GO:0009410; GO:0014823; GO:0021766; GO:0034698; GO:0043434; GO:0071375	GO:0004930; GO:0042277; GO:0001595	GO:0016021; GO:0016020; GO:0005886; GO:0009986	MAS1	17171	TRUE	-3.04848	0.000584592	0.0156322	chr17
ENSMUSG00000047423	ENSMUST00000159759; ENSMUST00000054477	AI837181	protein_coding	protein_coding	expressed sequence AI837181 [Source:MGI Symbol;Acc:MGI:2147598]	0.6052	1528	GO:0008150	GO:0003674	GO:0005575	C11orf68	107242	TRUE	0.147968	0.000588359	0.0157043	chr19
ENSMUSG00000028626	ENSMUST00000030372; ENSMUST00000151987; ENSMUST00000140119	Col9a2	protein_coding	protein_coding	collagen, type IX, alpha 2 [Source:MGI Symbol;Acc:MGI:88466]	0.6345	1389			GO:0005594	COL9A2	12840	TRUE	0.386152	0.000591601	0.015762	chr4
ENSMUSG00000002997	ENSMUST00000003079; ENSMUST00000036497; ENSMUST00000146865	Prkar2b	protein_coding	protein_coding	protein kinase, cAMP dependent regulatory, type II beta [Source:MGI Symbol;Acc:MGI:97760]	0.4558	2723	GO:0045859; GO:0001932; GO:0006631; GO:0050804; GO:2000480; GO:0007612; GO:0097332; GO:0097338; GO:0050790	GO:0000166; GO:0005515; GO:0008603; GO:0030552; GO:0019904; GO:0031625; GO:0034236; GO:0019901; GO:0004862	GO:0005737; GO:0016020; GO:0005886; GO:0048471; GO:0043025; GO:0005952; GO:0030425; GO:0098978; GO:0005813; GO:0045121; GO:0097546; GO:0098794; GO:0043197; GO:0043198	PRKAR2B	19088	TRUE	0.210593	0.000599679	0.0159482	chr12
ENSMUSG00000030123	ENSMUST00000015511; ENSMUST00000205003; ENSMUST00000123165; ENSMUST00000203628; ENSMUST00000131590	Plxnd1	protein_coding	protein_coding	plexin D1 [Source:MGI Symbol;Acc:MGI:2154244]	0.5633	1802	GO:0007165; GO:0071526; GO:0007416; GO:0001525; GO:0001822; GO:0003279; GO:0035904; GO:0060976; GO:0043087; GO:0030334; GO:0008360; GO:0032092; GO:0007162; GO:0050772; GO:1902287; GO:0003151; GO:0043542; GO:0045765; GO:0001569; GO:0043524; GO:0060666	GO:0005515; GO:0017154; GO:0019904	GO:0016020; GO:0016021; GO:0005886; GO:0005887; GO:0042995; GO:0030027; GO:0031258; GO:0002116; GO:0030424; GO:0044297	PLXND1	67784	TRUE	0.286089	0.000602183	0.015982	chr6
ENSMUSG00000107881	ENSMUST00000203092	Gm44250	protein_coding	TEC	predicted gene, 44250 [Source:MGI Symbol;Acc:MGI:5690642]	0.4008	4229						TRUE	-0.72999	0.000603136	0.015982	chr6
ENSMUSG00000031628	ENSMUST00000211115; ENSMUST00000093517; ENSMUST00000209668; ENSMUST00000210534	Casp3	protein_coding	protein_coding	caspase 3 [Source:MGI Symbol;Acc:MGI:107739]	0.4454	1469	GO:0006508; GO:0007605; GO:0043066; GO:0045786; GO:0009611; GO:0030218; GO:0006915; GO:0051402; GO:0007507; GO:0010033; GO:0043525; GO:0035556; GO:0071310; GO:0030182; GO:0016485; GO:0030163; GO:0006974; GO:0043065; GO:0045736; GO:0043029; GO:0031647; GO:0046007; GO:0009749; GO:0030216; GO:1904019; GO:0007413; GO:0045165; GO:0097194; GO:0007611; GO:0009411; GO:0030889; GO:1902512; GO:0001782; GO:…	GO:0004197; GO:0044877; GO:0016787; GO:0008233; GO:0008234; GO:0005515; GO:0002020; GO:0004175; GO:0004190; GO:0097153; GO:0097200; GO:0005123; GO:0097199; GO:0016005; GO:0004861	GO:0005634; GO:0005829; GO:0005737; GO:0043025; GO:0045121; GO:0008303; GO:0031264	CASP3	12367	TRUE	0.287209	0.00060658	0.0160442	chr8
ENSMUSG00000040972	ENSMUST00000039331	Igsf21	protein_coding	protein_coding	immunoglobulin superfamily, member 21 [Source:MGI Symbol;Acc:MGI:2681842]	0.6225	1979	GO:0007157; GO:0007156; GO:0060074	GO:0005515	GO:0016020; GO:0005886; GO:0031225; GO:0045202; GO:0045211; GO:0005912; GO:0042734; GO:0031362; GO:0060077	IGSF21	230868	TRUE	0.347462	0.000613722	0.0162038	chr4
ENSMUSG00000057615	ENSMUST00000075983	Ldoc1	protein_coding	protein_coding	regulator of NFKB signaling [Source:MGI Symbol;Acc:MGI:2685212]	0.5257	1459	GO:0071222; GO:0060137; GO:1903547; GO:0001893; GO:0071225	GO:0003674	GO:0005730; GO:0005654; GO:0005634	LDOC1	434784	TRUE	-1.27452	0.000615938	0.016233	chrX
ENSMUSG00000090258	ENSMUST00000041262; ENSMUST00000126408; ENSMUST00000110399; ENSMUST00000152917	Churc1	protein_coding	protein_coding	churchill domain containing 1 [Source:MGI Symbol;Acc:MGI:1923684]	0.4602	1724	GO:0007275; GO:0045893; GO:0045944; GO:0008543; GO:0007498	GO:0008270; GO:0046872; GO:0003677	GO:0005634	CHURC1	211151	TRUE	0.283917	0.000619352	0.0162681	chr12
ENSMUSG00000045871	ENSMUST00000078386	Slitrk6	protein_coding	protein_coding	SLIT and NTRK-like family, member 6 [Source:MGI Symbol;Acc:MGI:2443198]	0.3955	4240	GO:0035264; GO:0002093; GO:0008344; GO:0050896; GO:0002088; GO:0043010; GO:0007601; GO:0007409; GO:0042472; GO:0007416; GO:0048812; GO:0007605; GO:0060384; GO:0051965; GO:1905606; GO:0090102; GO:0001964; GO:0031223; GO:0021562; GO:0060005; GO:0060007	GO:0005515; GO:0003674	GO:0016020; GO:0016021; GO:0005886; GO:0071944; GO:0009986; GO:0005887	SLITRK6	239250	TRUE	0.403701	0.000619493	0.0162681	chr14
ENSMUSG00000034701	ENSMUST00000041099	Neurod1	protein_coding	protein_coding	neurogenic differentiation 1 [Source:MGI Symbol;Acc:MGI:1339708]	0.4357	2729	GO:0045944; GO:0030073; GO:0071333; GO:0045666; GO:0045664; GO:0006366; GO:0007259; GO:0006355; GO:0006357; GO:0007399; GO:0043010; GO:0045893; GO:0030154; GO:0030182; GO:0009952; GO:0043065; GO:0048666; GO:0035883; GO:0051091; GO:0009749; GO:0048839; GO:0006913; GO:0045165; GO:0007263; GO:0046426; GO:0035881; GO:0045597; GO:0021549; GO:0023019; GO:2000679; GO:0031018; GO:0030902; GO:0021542; GO:…	GO:0046983; GO:0043565; GO:0005515; GO:0003677; GO:0000978; GO:0000981; GO:0003700; GO:0001228; GO:0003682; GO:1990837; GO:0046982; GO:0003690; GO:0061629; GO:0070888	GO:0005634; GO:0005737; GO:0090575	NEUROD1	18012	TRUE	0.481544	0.000622263	0.0163089	chr2
ENSMUSG00000026972	ENSMUST00000102935; ENSMUST00000028349; ENSMUST00000155953; ENSMUST00000144963; ENSMUST00000129784; ENSMUST00000142887; ENSMUST00000152240; ENSMUST00000133934; ENSMUST00000155525; ENSMUST00000132074; ENSMUST00000156706; ENSMUST00000133396	Arrdc1	protein_coding	protein_coding	arrestin domain containing 1 [Source:MGI Symbol;Acc:MGI:2446136]	0.5685	899	GO:0045746; GO:0015031; GO:0006511; GO:0016567; GO:0140112; GO:0006858	GO:1990756; GO:0031625; GO:0042802; GO:1990763	GO:0016020; GO:0005886; GO:0005737; GO:1903561; GO:0031410	ARRDC1	215705	TRUE	0.384156	0.000623277	0.0163089	chr2
ENSMUSG00000089762	ENSMUST00000065134	Ier5l	protein_coding	protein_coding	immediate early response 5-like [Source:MGI Symbol;Acc:MGI:1919750]	0.6385	2683	GO:0008150	GO:0003674	GO:0005575	IER5L	72500	TRUE	0.293217	0.000629046	0.0164305	chr2
ENSMUSG00000063239	ENSMUST00000118489; ENSMUST00000118161; ENSMUST00000231416; ENSMUST00000231809; ENSMUST00000231290; ENSMUST00000232243; ENSMUST00000146277; ENSMUST00000147865	Grm4	protein_coding	protein_coding	glutamate receptor, metabotropic 4 [Source:MGI Symbol;Acc:MGI:1351341]	0.5953	2774	GO:0007186; GO:0007165; GO:0007154; GO:0023052; GO:0007196; GO:0043410	GO:0004930; GO:0008066	GO:0016021; GO:0016020; GO:0005886; GO:0005887; GO:0031410	GRM4	268934	TRUE	0.274075	0.000653617	0.0170418	chr17
ENSMUSG00000021224	ENSMUST00000117217; ENSMUST00000110298; ENSMUST00000085215; ENSMUST00000129335; ENSMUST00000154043; ENSMUST00000021647; ENSMUST00000155112; ENSMUST00000135962; ENSMUST00000136848; ENSMUST00000126943; ENSMUST00000125089; ENSMUST00000222439	Numb	protein_coding	protein_coding	NUMB endocytic adaptor protein [Source:MGI Symbol;Acc:MGI:107423]	0.5105	1616	GO:0045664; GO:0007399; GO:0050775; GO:0007405; GO:0030900; GO:0050769; GO:0007409; GO:1903077; GO:0030335; GO:0099149; GO:0034332; GO:0021670; GO:0021849; GO:0099150	GO:0005515; GO:0045296; GO:0008013; GO:0045294	GO:0005634; GO:0014069; GO:0005737; GO:0016020; GO:0005886; GO:0045177; GO:0005768; GO:0010008; GO:0098978; GO:0016323; GO:0005769; GO:0043197; GO:0005905; GO:0019897; GO:0030136; GO:0031410	NUMB	18222	TRUE	-0.164588	0.000658786	0.017146	chr12
ENSMUSG00000020235	ENSMUST00000140901; ENSMUST00000020457; ENSMUST00000138343; ENSMUST00000118812; ENSMUST00000150824; ENSMUST00000127203	Fzr1	protein_coding	protein_coding	fizzy and cell division cycle 20 related 1 [Source:MGI Symbol;Acc:MGI:1926790]	0.6046	1708	GO:0006281; GO:0006974; GO:0016567; GO:0007049; GO:0051301; GO:0007095; GO:0031145; GO:1904668; GO:1905786; GO:0051603; GO:0008284; GO:2000773; GO:0040020; GO:0070306	GO:0005515; GO:0010997; GO:0097027; GO:1990757	GO:0005654; GO:0031965; GO:0005680	FZR1	56371	TRUE	0.172578	0.00066554	0.017291	chr10
ENSMUSG00000024982	ENSMUST00000225963; ENSMUST00000226103; ENSMUST00000225495; ENSMUST00000224897; ENSMUST00000076891; ENSMUST00000225032; ENSMUST00000224291; ENSMUST00000223807; ENSMUST00000223743; ENSMUST00000223625; ENSMUST00000224474	Zdhhc6	protein_coding	protein_coding	zinc finger, DHHC domain containing 6 [Source:MGI Symbol;Acc:MGI:1914230]	0.4556	1930	GO:0006612; GO:0018230; GO:0018345; GO:0010636; GO:0140438	GO:0016740; GO:0016746; GO:0005515; GO:0016409; GO:0019706; GO:0140439	GO:0016020; GO:0016021; GO:0005783; GO:0005789; GO:0005794	ZDHHC6	66980	TRUE	-0.189834	0.000680106	0.0176313	chr19
ENSMUSG00000047330	ENSMUST00000057262; ENSMUST00000187432	Kcne4	protein_coding	protein_coding	potassium voltage-gated channel, Isk-related subfamily, gene 4 [Source:MGI Symbol;Acc:MGI:1891125]	0.477	2235	GO:0006811; GO:0006813; GO:0034765; GO:0071805; GO:0060307; GO:0086011; GO:0086091; GO:0098915; GO:1902260; GO:0086005; GO:0097623	GO:0005249; GO:0005244; GO:0005267; GO:0044325; GO:0005251; GO:0015459; GO:1902282	GO:0016020; GO:0016021; GO:0016324; GO:0008076	KCNE4	57814	TRUE	-0.537962	0.000682088	0.0176313	chr1
ENSMUSG00000028927	ENSMUST00000030765; ENSMUST00000148160; ENSMUST00000130958	Padi2	protein_coding	protein_coding	peptidyl arginine deiminase, type II [Source:MGI Symbol;Acc:MGI:1338892]	0.5543	1933	GO:1990830; GO:0045815; GO:0030520; GO:0070100; GO:1901624	GO:0005509; GO:0004668; GO:0046872; GO:0016787; GO:0042803; GO:0030331	GO:0005737; GO:0005634; GO:0000791	PADI2	18600	TRUE	-0.320706	0.000682252	0.0176313	chr4
ENSMUSG00000042105	ENSMUST00000098007; ENSMUST00000043138; ENSMUST00000129085; ENSMUST00000148815; ENSMUST00000130789; ENSMUST00000142075; ENSMUST00000151237; ENSMUST00000202419; ENSMUST00000118605	Inpp5f	protein_coding	protein_coding	inositol polyphosphate-5-phosphatase F [Source:MGI Symbol;Acc:MGI:2141867]	0.458	2249	GO:0014898; GO:0046856; GO:0048015; GO:0001921; GO:0033137; GO:0042532; GO:0051896; GO:2000145; GO:2001135; GO:0048681; GO:0008344; GO:0072583; GO:0031161; GO:0070072	GO:0016791; GO:0016787; GO:0005515; GO:0008934; GO:0052832; GO:0052833; GO:0052834; GO:0042803; GO:0034595; GO:0034596; GO:0043812	GO:0016020; GO:0043231; GO:0005768; GO:0005769; GO:0055037; GO:0005905; GO:0045334; GO:0043025; GO:0005737; GO:0030425; GO:0030424; GO:0016021; GO:0031410	INPP5F	101490	TRUE	-0.1805	0.00068699	0.0177224	chr7
ENSMUSG00000069892	ENSMUST00000101295; ENSMUST00000093152; ENSMUST00000132768	9930111J21Rik2	protein_coding	protein_coding	RIKEN cDNA 9930111J21 gene 2 [Source:MGI Symbol;Acc:MGI:3711310]	0.4532	3009	GO:0008150; GO:0006952; GO:0035458	GO:0005525; GO:0003674; GO:0003924	GO:0016020; GO:0005575; GO:0005789		245240	TRUE	-0.394288	0.000688399	0.0177275	chr11
ENSMUSG00000026426	ENSMUST00000027684; ENSMUST00000125774; ENSMUST00000123344; ENSMUST00000141177	Arl8a	protein_coding	protein_coding	ADP-ribosylation factor-like 8A [Source:MGI Symbol;Acc:MGI:1915974]	0.5243	1086	GO:0015031; GO:0007049; GO:0051301; GO:0007059; GO:0008089	GO:0005525; GO:0003924; GO:0000166	GO:0005737; GO:0016020; GO:0045202; GO:0005856; GO:0042995; GO:0030424; GO:0005764; GO:0005768; GO:0005765; GO:0031902; GO:0005819; GO:0030496; GO:1904115; GO:0051233; GO:0010008	ARL8A	68724	TRUE	0.122789	0.000691677	0.0177806	chr1
ENSMUSG00000010505	ENSMUST00000081125; ENSMUST00000156190; ENSMUST00000108756; ENSMUST00000183403; ENSMUST00000108757; ENSMUST00000223883; ENSMUST00000129856; ENSMUST00000130079; ENSMUST00000129843; ENSMUST00000142245; ENSMUST00000135744; ENSMUST00000148766	Myt1	protein_coding	protein_coding	myelin transcription factor 1 [Source:MGI Symbol;Acc:MGI:1100535]	0.5099	2565	GO:0006355; GO:0010629; GO:0010628; GO:0009791; GO:0061178; GO:0006357; GO:0007399; GO:0030154; GO:0001678; GO:0045944; GO:0031018; GO:0032350; GO:0060539	GO:0008270; GO:0003677; GO:0046872; GO:0005515; GO:0000978; GO:0000981; GO:0000987; GO:0001228; GO:0000977	GO:0005634; GO:0005654; GO:0005829	MYT1	17932	TRUE	0.286439	0.000695142	0.0178093	chr2
ENSMUSG00000055866	ENSMUST00000069620; ENSMUST00000185298	Per2	protein_coding	protein_coding	period circadian clock 2 [Source:MGI Symbol;Acc:MGI:1195265]	0.5596	3032	GO:0048511; GO:0000122; GO:0007623; GO:0045892	GO:0005515	GO:0005634; GO:0005737; GO:0005654; GO:0005829	PER2	18627	TRUE	-0.318092	0.000695874	0.0178093	chr1
ENSMUSG00000108591	ENSMUST00000205370	Particl	protein_coding	TEC	promoter of Mat2a antisense radiation induced circulating long non-coding RNA [Source:MGI Symbol;Acc:MGI:1925358]	0.6058	1560					78108	TRUE	0.242611	0.000696446	0.0178093	chr6
ENSMUSG00000039154	ENSMUST00000044216; ENSMUST00000225145; ENSMUST00000224021; ENSMUST00000223629; ENSMUST00000233858; ENSMUST00000223687; ENSMUST00000223841	Shd	protein_coding	protein_coding	src homology 2 domain-containing transforming protein D [Source:MGI Symbol;Acc:MGI:1099461]	0.5989	910		GO:0001784	GO:0005575	SHD	20420	TRUE	0.242927	0.000705424	0.0180074	chr17
ENSMUSG00000045180	ENSMUST00000101141; ENSMUST00000137217; ENSMUST00000062317; ENSMUST00000152746; ENSMUST00000124141; ENSMUST00000141677	Shroom2	protein_coding	protein_coding	shroom family member 2 [Source:MGI Symbol;Acc:MGI:107194]	0.499	4125	GO:0032401; GO:0045176; GO:0016477; GO:0007015; GO:0007420; GO:0002089; GO:0008057; GO:0030835; GO:0032438; GO:0043010; GO:0043482; GO:0043583; GO:0045217; GO:0048593	GO:0005515; GO:0051015; GO:0003779; GO:0019904; GO:0008013	GO:0005737; GO:0005856; GO:0005874; GO:0030864; GO:0016020; GO:0005886; GO:0070161; GO:0016324; GO:0005911; GO:0043025; GO:0005923; GO:0005912; GO:0005938; GO:0043296	SHROOM2	110380	TRUE	-0.307577	0.000707934	0.01804	chrX
ENSMUSG00000027971	ENSMUST00000173932; ENSMUST00000147016; ENSMUST00000144344; ENSMUST00000174648; ENSMUST00000172632; ENSMUST00000198101	Ndst4	protein_coding	protein_coding	N-deacetylase/N-sulfotransferase (heparin glucosaminyl) 4 [Source:MGI Symbol;Acc:MGI:1932545]	0.4221	3390	GO:0008152; GO:0015012; GO:0030210; GO:0015014	GO:0016787; GO:0008146; GO:0015016; GO:0016740; GO:0003824; GO:0019213; GO:0050119	GO:0016020; GO:0016021; GO:0000139; GO:0005794	NDST4	64580	TRUE	-0.644589	0.000722447	0.0183778	chr3
ENSMUSG00000048349	ENSMUST00000053016; ENSMUST00000139505	Pou4f1	protein_coding	protein_coding	POU domain, class 4, transcription factor 1 [Source:MGI Symbol;Acc:MGI:102525]	0.4538	2622	GO:0006355; GO:0045944; GO:0043524; GO:0000122; GO:0051402; GO:0030182; GO:0006357; GO:0043525; GO:0051726; GO:0001764; GO:0007399; GO:0031175; GO:0050767; GO:0010628; GO:0060384; GO:0003223; GO:0001967; GO:2000679; GO:0072332; GO:0043066; GO:0045672; GO:0010629; GO:0021953; GO:0071345; GO:0051090; GO:0071392; GO:0007507; GO:0043069; GO:0007498; GO:0021535; GO:0021559; GO:0021986; GO:0048665; GO:…	GO:0003677; GO:0003700; GO:0000981; GO:0005515; GO:0043565; GO:0000978; GO:0001228; GO:1990837; GO:0061629; GO:0003697; GO:0001227; GO:0003682; GO:0051020	GO:0005634; GO:0005737; GO:0043005; GO:0000785; GO:0090575	POU4F1	18996	TRUE	1.45135	0.000723932	0.0183836	chr14
ENSMUSG00000026525	ENSMUST00000027809	Opn3	protein_coding	protein_coding	opsin 3 [Source:MGI Symbol;Acc:MGI:1338022]	0.541	1913	GO:0007186; GO:0043066; GO:0007165; GO:0050896; GO:0007602; GO:0030216; GO:0009584; GO:0071482; GO:1901857; GO:0046326; GO:0048023; GO:0009637; GO:0071492; GO:0048022	GO:0004930; GO:0009881; GO:0005503; GO:0008020; GO:0005502	GO:0016021; GO:0005737; GO:0016020; GO:0005886; GO:0005887; GO:0001750	OPN3	13603	TRUE	-0.494028	0.000727422	0.0184102	chr1
ENSMUSG00000020614	ENSMUST00000155559; ENSMUST00000020938; ENSMUST00000146408; ENSMUST00000144972	Fam20a	protein_coding	protein_coding	FAM20A, golgi associated secretory pathway pseudokinase [Source:MGI Symbol;Acc:MGI:2388266]	0.5507	1812	GO:0009617; GO:0001934; GO:0055074; GO:0071902; GO:0044691; GO:0070166; GO:0031214	GO:0043539	GO:0005737; GO:0005794; GO:0005615; GO:0005783; GO:0005576	FAM20A	208659	TRUE	0.37494	0.000728471	0.0184102	chr11
ENSMUSG00000039637	ENSMUST00000038552; ENSMUST00000150028; ENSMUST00000150724; ENSMUST00000135823; ENSMUST00000151156; ENSMUST00000139072; ENSMUST00000143723; ENSMUST00000127125; ENSMUST00000130125; ENSMUST00000090480; ENSMUST00000123031; ENSMUST00000127850	Coro7	protein_coding	protein_coding	coronin 7 [Source:MGI Symbol;Acc:MGI:1926135]	0.5651	1342	GO:0016477; GO:0015031; GO:0007015; GO:0007030; GO:0030010; GO:0006895; GO:0030041; GO:0035332	GO:0005515; GO:0003779; GO:0051015	GO:0005737; GO:0016020; GO:0000139; GO:0005794; GO:0005829; GO:0031410; GO:0016021; GO:0005802	CORO7,CORO7-PAM16	78885	TRUE	0.158436	0.000728754	0.0184102	chr16
ENSMUSG00000027175	ENSMUST00000129571; ENSMUST00000111118; ENSMUST00000028597; ENSMUST00000129792; ENSMUST00000137428; ENSMUST00000126310; ENSMUST00000132600	Tcp11l1	protein_coding	protein_coding	t-complex 11 like 1 [Source:MGI Symbol;Acc:MGI:2444263]	0.5104	1877	GO:0007165	GO:0003674	GO:0005874	TCP11L1	320554	TRUE	-0.2121	0.000731539	0.0184487	chr2
ENSMUSG00000021703	ENSMUST00000049488; ENSMUST00000224250; ENSMUST00000224458	Serinc5	protein_coding	protein_coding	serine incorporator 5 [Source:MGI Symbol;Acc:MGI:2444223]	0.4882	2589	GO:0042552; GO:0051607; GO:0002376; GO:0006629; GO:0045087; GO:0008654; GO:0006665; GO:0006658; GO:0009597; GO:1904219; GO:1904222		GO:0016020; GO:0005829; GO:0016021; GO:0005886; GO:0005794; GO:0043231; GO:0005813; GO:0043209	SERINC5	218442	TRUE	-0.212528	0.000733248	0.0184599	chr13
ENSMUSG00000050321	ENSMUST00000058829; ENSMUST00000236600; ENSMUST00000235167	Neto1	protein_coding	protein_coding	neuropilin (NRP) and tolloid (TLL)-like 1 [Source:MGI Symbol;Acc:MGI:2180216]	0.4235	3088	GO:0048168; GO:0007613; GO:2000463; GO:0048169; GO:0008542; GO:0097120; GO:2000312	GO:0005515; GO:0035255	GO:0045202; GO:0014069; GO:0016020; GO:0016021; GO:0005886; GO:0045211; GO:0098839; GO:0098978; GO:0060076; GO:0099061	NETO1	246317	TRUE	-0.675416	0.00073533	0.0184805	chr18
ENSMUSG00000026864	ENSMUST00000028222; ENSMUST00000100171; ENSMUST00000137145; ENSMUST00000145466; ENSMUST00000155595; ENSMUST00000129333	Hspa5	protein_coding	protein_coding	heat shock protein 5 [Source:MGI Symbol;Acc:MGI:95835]	0.4773	1418	GO:0043066; GO:0010976; GO:0071353; GO:0006983; GO:0034976; GO:0030512; GO:0030433; GO:0042149; GO:1901998; GO:0030335; GO:0030968; GO:0031204; GO:0031333; GO:0051603; GO:0051085; GO:0042026; GO:0034620; GO:0001554; GO:0009314; GO:0021589; GO:0021680; GO:0030182; GO:0031398; GO:0035437; GO:0040019; GO:0042220; GO:0051402; GO:0071236; GO:0071277; GO:0071287; GO:0071320; GO:0071466; GO:0071480; GO:…	GO:0005524; GO:0140662; GO:0005515; GO:0016787; GO:0000166; GO:0016887; GO:0043022; GO:0019904; GO:0019899; GO:0031625; GO:0051082; GO:0044183; GO:0031072; GO:0051787	GO:0005739; GO:0005634; GO:0005829; GO:0005737; GO:0005886; GO:0005783; GO:0032991; GO:0009986; GO:0043231; GO:0016020; GO:0042470; GO:0005788; GO:0005789; GO:0030176; GO:0030496; GO:0043209; GO:0005793; GO:0005576; GO:0005790; GO:0008180; GO:0034663	HSPA5	14828	TRUE	-0.245294	0.000737068	0.0184924	chr2
ENSMUSG00000024873	ENSMUST00000025805; ENSMUST00000235638	Cnih2	protein_coding	protein_coding	cornichon family AMPA receptor auxiliary protein 2 [Source:MGI Symbol;Acc:MGI:1277225]	0.617	1157	GO:0016192; GO:0035249; GO:0042391; GO:2000311; GO:0051668; GO:0098962; GO:1902684; GO:1903743; GO:2000310	GO:0016247	GO:0016020; GO:0016021; GO:0005886; GO:0005783; GO:0005789; GO:0045202; GO:0045211; GO:0042995; GO:0030425; GO:0043198; GO:0014069; GO:0098978; GO:0099061; GO:0043197; GO:0032281	CNIH2	12794	TRUE	0.18195	0.000743915	0.0186071	chr19
ENSMUSG00000032036	ENSMUST00000184203; ENSMUST00000183580; ENSMUST00000115148; ENSMUST00000187625; ENSMUST00000190549; ENSMUST00000045091; ENSMUST00000188933; ENSMUST00000187182; ENSMUST00000188658	Kirrel3	protein_coding	protein_coding	kirre like nephrin family adhesion molecule 3 [Source:MGI Symbol;Acc:MGI:1914953]	0.5487	2787	GO:0098609; GO:0007155; GO:0007416; GO:0001764; GO:0048812; GO:0030097; GO:0002121; GO:0021766; GO:0007156; GO:0072102; GO:0021740	GO:0005515; GO:0050839; GO:0030165	GO:0030424; GO:0016020; GO:0016021; GO:0005886; GO:0005887; GO:0005576; GO:0042995; GO:0030425; GO:0043198; GO:0005911; GO:0008021	KIRREL3	67703	TRUE	0.230659	0.000744486	0.0186071	chr9
ENSMUSG00000022723	ENSMUST00000129762; ENSMUST00000044604; ENSMUST00000172910; ENSMUST00000232544; ENSMUST00000129350; ENSMUST00000139989	Crybg3	protein_coding	protein_coding	beta-gamma crystallin domain containing 3 [Source:MGI Symbol;Acc:MGI:2676311]	0.4445	3892	GO:0001654	GO:0030246; GO:0051018	GO:0032991	CRYBG3	224273	TRUE	-0.284619	0.000745453	0.0186071	chr16
ENSMUSG00000038128	ENSMUST00000234205; ENSMUST00000234654; ENSMUST00000234001; ENSMUST00000042868	Camk4	protein_coding	protein_coding	calcium/calmodulin-dependent protein kinase IV [Source:MGI Symbol;Acc:MGI:88258]	0.5176	1735	GO:0006468; GO:0016310; GO:0007616; GO:0043011; GO:0045893	GO:0004672; GO:0005524; GO:0000166; GO:0016301; GO:0004674; GO:0004683	GO:0001650; GO:0005654; GO:0098794; GO:0098978	CAMK4	12326	TRUE	-0.272284	0.000747162	0.018618	chr18
ENSMUSG00000041801	ENSMUST00000038945; ENSMUST00000136445	Phlda3	protein_coding	protein_coding	pleckstrin homology like domain, family A, member 3 [Source:MGI Symbol;Acc:MGI:1351485]	0.5836	1002	GO:0051898; GO:0006915; GO:0043065; GO:0042771	GO:0010314; GO:0032266; GO:0080025; GO:1901981; GO:0005547; GO:0005546; GO:0043325	GO:0005737; GO:0016020; GO:0005886	PHLDA3	27280	TRUE	-0.285968	0.00075189	0.0187039	chr1
ENSMUSG00000060044	ENSMUST00000219392; ENSMUST00000080995; ENSMUST00000218918	Tmem26	protein_coding	protein_coding	transmembrane protein 26 [Source:MGI Symbol;Acc:MGI:2143537]	0.5146	2440	GO:0008150	GO:0003674	GO:0016020; GO:0016021; GO:0005575	TMEM26	327766	TRUE	0.821503	0.000764057	0.0189743	chr10
ENSMUSG00000041205	ENSMUST00000040880	Map6d1	protein_coding	protein_coding	MAP6 domain containing 1 [Source:MGI Symbol;Acc:MGI:3607784]	0.5137	3280	GO:0000226; GO:0007026; GO:0030705; GO:0070507; GO:0018009	GO:0005516; GO:0008017	GO:0005737; GO:0005794; GO:0005856; GO:0005874; GO:0005801; GO:0005798	MAP6D1	208158	TRUE	-0.270051	0.000766456	0.0190016	chr16
ENSMUSG00000051344	ENSMUST00000139649; ENSMUST00000097713; ENSMUST00000187188; ENSMUST00000140857; ENSMUST00000123225; ENSMUST00000134097	Plekhm3	protein_coding	protein_coding	pleckstrin homology domain containing, family M, member 3 [Source:MGI Symbol;Acc:MGI:2443627]	0.4846	3014	GO:0045445	GO:0046872; GO:0005515	GO:0005737; GO:0016020; GO:0005794; GO:0005886	PLEKHM3	241075	TRUE	-0.152611	0.000767758	0.0190017	chr1
ENSMUSG00000019891	ENSMUST00000069004; ENSMUST00000218278; ENSMUST00000218582	Dcbld1	protein_coding	protein_coding	discoidin, CUB and LCCL domain containing 1 [Source:MGI Symbol;Acc:MGI:1913936]	0.475	3559	GO:0031638	GO:0004252	GO:0016020; GO:0016021; GO:0005615; GO:0072562	DCBLD1	66686	TRUE	-0.288285	0.000774769	0.0191428	chr10
ENSMUSG00000062785	ENSMUST00000209177; ENSMUST00000207493; ENSMUST00000208651; ENSMUST00000107907; ENSMUST00000107906; ENSMUST00000208412; ENSMUST00000207497	Kcnc3	protein_coding	protein_coding	potassium voltage gated channel, Shaw-related subfamily, member 3 [Source:MGI Symbol;Acc:MGI:96669]	0.6272	2902	GO:0055085; GO:0006811; GO:0051260; GO:0006813; GO:0034765; GO:0071805; GO:0051262; GO:0046928; GO:0034220	GO:0005216; GO:0005244; GO:0005249; GO:0005267; GO:0005251	GO:0016020; GO:0016021; GO:0008076; GO:0005737; GO:0005886; GO:0030424; GO:0045202; GO:0045211; GO:0005856; GO:0042995; GO:0030425; GO:0043204; GO:0005938; GO:0098978; GO:0031594; GO:0043679; GO:0099056; GO:0032590; GO:0099055; GO:0032809; GO:0042734; GO:0030673; GO:0032591	KCNC3	16504	TRUE	-0.31796	0.00077612	0.0191438	chr7
ENSMUSG00000020964	ENSMUST00000021347; ENSMUST00000178462; ENSMUST00000165282; ENSMUST00000167466; ENSMUST00000166691; ENSMUST00000171465; ENSMUST00000167594; ENSMUST00000171959; ENSMUST00000172246; ENSMUST00000169843	Sel1l	protein_coding	protein_coding	sel-1 suppressor of lin-12-like (C. elegans) [Source:MGI Symbol;Acc:MGI:1329016]	0.4819	2770	GO:0007219; GO:0009306; GO:0034976; GO:0036503; GO:0006641; GO:0030970	GO:0005515	GO:0016020; GO:0016021; GO:0005783; GO:0005789; GO:0036513; GO:0000839	SEL1L	20338	TRUE	-0.119034	0.000785525	0.0193432	chr12
ENSMUSG00000038633	ENSMUST00000035295; ENSMUST00000132551; ENSMUST00000133052	Degs1	protein_coding	protein_coding	delta(4)-desaturase, sphingolipid 1 [Source:MGI Symbol;Acc:MGI:1097711]	0.4758	1411	GO:0006629; GO:0006631; GO:0006633; GO:0046513; GO:0043065; GO:0030148; GO:0043217	GO:0016853; GO:0016491; GO:0016717; GO:0042284; GO:0050251	GO:0005739; GO:0016020; GO:0016021; GO:0005783; GO:0005789; GO:0031966	DEGS1	13244	TRUE	-0.141133	0.000789938	0.0194192	chr1
ENSMUSG00000068747	ENSMUST00000135636; ENSMUST00000102632; ENSMUST00000129755	Sort1	protein_coding	protein_coding	sortilin 1 [Source:MGI Symbol;Acc:MGI:1338015]	0.5027	6275	GO:0010468; GO:0045599; GO:0032868; GO:0030154; GO:0007186; GO:0001503; GO:0006897; GO:0006622; GO:0006895; GO:0008333; GO:0014902; GO:0007218; GO:0006892; GO:0008625; GO:0048011; GO:0090160; GO:0046323; GO:1904037; GO:0051005; GO:0048227; GO:0016050; GO:0032509; GO:0038180	GO:0005515; GO:0019899; GO:0048406; GO:1905394; GO:0010465; GO:0030379	GO:0005829; GO:0005634; GO:0016020; GO:0016021; GO:0005794; GO:0005886; GO:0005783; GO:0005789; GO:0048471; GO:0009986; GO:0043231; GO:0005764; GO:0010008; GO:0043025; GO:0005768; GO:0005765; GO:0031965; GO:0031410; GO:0032580; GO:0030425; GO:0005769; GO:0005905; GO:0030659; GO:0030136; GO:0030140	SORT1	20661	TRUE	-0.187257	0.000791654	0.0194287	chr3
ENSMUSG00000004383	ENSMUST00000004497; ENSMUST00000119826; ENSMUST00000212459; ENSMUST00000146249	Large1	protein_coding	protein_coding	LARGE xylosyl- and glucuronyltransferase 1 [Source:MGI Symbol;Acc:MGI:1342270]	0.4872	4137	GO:0006486; GO:0008152; GO:0035269; GO:0009101; GO:0043403; GO:0060538; GO:0046716	GO:0016757; GO:0016740; GO:0046872; GO:0003824; GO:0005515; GO:0015020; GO:0030145; GO:0016758; GO:0042285	GO:0016020; GO:0016021; GO:0000139; GO:0005794; GO:0043231	LARGE1	16795	TRUE	-0.152384	0.000793103	0.0194317	chr8
ENSMUSG00000039629	ENSMUST00000151738; ENSMUST00000137068; ENSMUST00000115224; ENSMUST00000130969; ENSMUST00000046028	Strip2	protein_coding	protein_coding	striatin interacting protein 2 [Source:MGI Symbol;Acc:MGI:2444363]	0.4727	4211	GO:0016477; GO:0008360; GO:0007010	GO:0003674	GO:0005829; GO:0005737	STRIP2	320609	TRUE	-0.294898	0.000802984	0.0196409	chr6
ENSMUSG00000036097	ENSMUST00000096053; ENSMUST00000236895; ENSMUST00000236356; ENSMUST00000236057; ENSMUST00000237505	Slf2	protein_coding	protein_coding	SMC5-SMC6 complex localization factor 2 [Source:MGI Symbol;Acc:MGI:1924968]	0.4418	4300	GO:0006974; GO:0031334; GO:0034184; GO:1990166; GO:2000781	GO:0031625; GO:0044877	GO:0000785; GO:0005634; GO:0005654; GO:0035861; GO:0043231	SLF2	226151	TRUE	-0.250463	0.000805512	0.0196567	chr19
ENSMUSG00000037428	ENSMUST00000190827; ENSMUST00000041543; ENSMUST00000186451; ENSMUST00000187382	Vgf	protein_coding	protein_coding	VGF nerve growth factor inducible [Source:MGI Symbol;Acc:MGI:1343180]	0.6442	2061	GO:0030073; GO:0032868; GO:0007165; GO:0042742; GO:0042593; GO:0001541; GO:0002021; GO:0006091; GO:0048168; GO:0009409; GO:0019953; GO:0043084; GO:0048167; GO:0033500; GO:0051591	GO:0005184; GO:0008083; GO:0005179	GO:0045202; GO:0005615; GO:0005794; GO:0031410; GO:0043231; GO:0005576; GO:0043005; GO:0043025; GO:0030667; GO:0030133	VGF	381677	TRUE	-0.396191	0.000806318	0.0196567	chr5
ENSMUSG00000021680	ENSMUST00000221025; ENSMUST00000045583	Crhbp	protein_coding	protein_coding	corticotropin releasing hormone binding protein [Source:MGI Symbol;Acc:MGI:88497]	0.49	1740	GO:0071391; GO:0006954; GO:0071356; GO:0007565; GO:0042445; GO:0071277; GO:0071392; GO:0045055; GO:0071320; GO:0048149; GO:0071466; GO:0009755; GO:0071314; GO:0080135; GO:2000310; GO:0035865; GO:0001963; GO:0002125; GO:0035903; GO:0051459; GO:0051460; GO:0097211; GO:1900011	GO:0051424; GO:0042277	GO:0005634; GO:0005615; GO:0005576; GO:0030425; GO:0043204; GO:0005874; GO:0030141; GO:0043679; GO:0031045; GO:0005771; GO:0043196; GO:0005767	CRHBP	12919	TRUE	-0.866813	0.000808054	0.0196662	chr13
ENSMUSG00000005615	ENSMUST00000115137; ENSMUST00000079791; ENSMUST00000141421; ENSMUST00000141772; ENSMUST00000123199; ENSMUST00000115140; ENSMUST00000104893; ENSMUST00000231920	Pcyt1a	protein_coding	protein_coding	phosphate cytidylyltransferase 1, choline, alpha isoform [Source:MGI Symbol;Acc:MGI:88557]	0.4949	1997	GO:0009058; GO:0006629; GO:0008654; GO:0006656; GO:0006545; GO:0006657	GO:0003824; GO:0004105; GO:0005515; GO:0016740; GO:0005516; GO:0042802; GO:0042803; GO:0016779; GO:0008289; GO:0031210; GO:0140678	GO:0005783; GO:0005634; GO:0005737; GO:0016020; GO:0005886; GO:0005829; GO:0005635; GO:0005789; GO:0042587	PCYT1A	13026	TRUE	-0.141738	0.000811741	0.0197231	chr16
ENSMUSG00000040723	ENSMUST00000097474; ENSMUST00000040357; ENSMUST00000193714; ENSMUST00000192566; ENSMUST00000195045	Rcsd1	protein_coding	protein_coding	RCSD domain containing 1 [Source:MGI Symbol;Acc:MGI:2676394]	0.5199	2907	GO:0003009; GO:0071474	GO:0051015	GO:0005575	RCSD1	226594	TRUE	0.383244	0.000820439	0.0199014	chr1
ENSMUSG00000027363	ENSMUST00000138859; ENSMUST00000028841; ENSMUST00000110416	Usp8	protein_coding	protein_coding	ubiquitin specific peptidase 8 [Source:MGI Symbol;Acc:MGI:1934029]	0.462	3921	GO:0006511; GO:0016579; GO:0006508; GO:0007049; GO:0007032; GO:0007265; GO:0032880; GO:1990090; GO:0031647; GO:0090263; GO:0071108; GO:0070536; GO:0000281; GO:0099576; GO:0071549	GO:0004843; GO:0005515; GO:0016787; GO:0008233; GO:0008234; GO:0017124; GO:0101005	GO:0014069; GO:0005829; GO:0005737; GO:0005634; GO:0016020; GO:0005886; GO:0110165; GO:0005768; GO:0010008; GO:0098978; GO:0005769; GO:0030496; GO:0043197; GO:0002080; GO:0019897; GO:0031313	USP8	84092	TRUE	-0.136407	0.000823003	0.0199182	chr2
ENSMUSG00000055745	ENSMUST00000069476	Rtl6	protein_coding	protein_coding	retrotransposon Gag like 6 [Source:MGI Symbol;Acc:MGI:2675858]	0.573	4426	GO:0008150	GO:0003674	GO:0005575	RTL6	223732	TRUE	0.169875	0.000823856	0.0199182	chr15
ENSMUSG00000022865	ENSMUST00000232148; ENSMUST00000023572; ENSMUST00000114229; ENSMUST00000231356; ENSMUST00000232189; ENSMUST00000231251	Cxadr	protein_coding	protein_coding	coxsackie virus and adenovirus receptor [Source:MGI Symbol;Acc:MGI:1201679]	0.4762	1786	GO:0007005; GO:0055013; GO:0007507; GO:0060044; GO:0060038; GO:0031532; GO:0007155; GO:0051607; GO:0030593; GO:0034109; GO:0098609; GO:0007157; GO:0045216; GO:0070633; GO:0010669; GO:0008354; GO:0046629; GO:0060054; GO:0086067; GO:0086072; GO:0098904	GO:0005515; GO:0005102; GO:0042802; GO:0005178; GO:0050839; GO:0030165; GO:0008013; GO:0071253; GO:0086082	GO:0005737; GO:0005654; GO:0005634; GO:0016020; GO:0016021; GO:0005886; GO:0005615; GO:0032991; GO:0070161; GO:0016323; GO:0045121; GO:0005576; GO:0030426; GO:0030175; GO:0005911; GO:0030054; GO:0043005; GO:0005923; GO:0005912; GO:0031594; GO:0014704; GO:0044297; GO:0001669; GO:0016327	CXADR	13052	TRUE	0.369661	0.00082937	0.0200185	chr16
ENSMUSG00000026117	ENSMUST00000027291; ENSMUST00000185871; ENSMUST00000186624; ENSMUST00000190128	Zap70	protein_coding	protein_coding	zeta-chain (TCR) associated protein kinase [Source:MGI Symbol;Acc:MGI:99613]	0.5885	1211	GO:0006468; GO:0045087; GO:0016310; GO:0035556; GO:0002376; GO:0030154; GO:0002250; GO:0050778; GO:0030217; GO:0050852; GO:0019722; GO:0045059; GO:0045582; GO:0046777; GO:0045061; GO:0046638; GO:0002696; GO:0006955; GO:0007169; GO:0050850; GO:0018108; GO:0046632; GO:0046641; GO:0045060; GO:0043366	GO:0005524; GO:0004672; GO:0005515; GO:0016740; GO:0000166; GO:0016301; GO:0004713; GO:0004715; GO:0005102; GO:0001784	GO:0005829; GO:0005737; GO:0016020; GO:0005886; GO:0005911; GO:0045121; GO:0001772; GO:0042101; GO:0031234	ZAP70	22637	TRUE	0.390288	0.000831273	0.0200314	chr1
ENSMUSG00000027177	ENSMUST00000028600; ENSMUST00000111124; ENSMUST00000111125; ENSMUST00000132622	Hipk3	protein_coding	protein_coding	homeodomain interacting protein kinase 3 [Source:MGI Symbol;Acc:MGI:1314882]	0.4783	4020	GO:0006468; GO:0043066; GO:0016310; GO:0018108; GO:0018105; GO:0006915; GO:0000122; GO:0018107; GO:0043388; GO:0009299; GO:0043508	GO:0005524; GO:0004672; GO:0016740; GO:0000166; GO:0016301; GO:0005515; GO:0004674; GO:0106310; GO:0004713; GO:0003714	GO:0005829; GO:0016604; GO:0005634; GO:0005737; GO:0005886; GO:0016605	HIPK3	15259	TRUE	-0.161104	0.000842237	0.0202622	chr2
ENSMUSG00000073805	ENSMUST00000210055; ENSMUST00000171394; ENSMUST00000210826	Insyn2a	protein_coding	protein_coding	inhibitory synaptic factor 2A [Source:MGI Symbol;Acc:MGI:3605068]	0.553	2739				INSYN2A	627214	TRUE	-0.631647	0.000851416	0.0204494	chr7
ENSMUSG00000054079	ENSMUST00000066888; ENSMUST00000130797; ENSMUST00000134807	Utp18	protein_coding	protein_coding	UTP18 small subunit processome component [Source:MGI Symbol;Acc:MGI:1923402]	0.4226	2158	GO:0006364	GO:0005515	GO:0005634; GO:0005730; GO:0005654; GO:0031965; GO:0032040; GO:0034388	UTP18	217109	TRUE	-0.201409	0.000853631	0.0204689	chr11
ENSMUSG00000108325	ENSMUST00000205934	Gm44898	protein_coding	TEC	predicted gene 44898 [Source:MGI Symbol;Acc:MGI:5753474]	0.4166	2223						TRUE	0.485497	0.00085552	0.0204807	chr7
ENSMUSG00000012609	ENSMUST00000177188; ENSMUST00000095536; ENSMUST00000110220; ENSMUST00000040179; ENSMUST00000176695; ENSMUST00000040273; ENSMUST00000176008; ENSMUST00000110224; ENSMUST00000142411; ENSMUST00000124701; ENSMUST00000153570; ENSMUST00000155448; ENSMUST00000177114; ENSMUST00000175899; ENSMUST00000176460; ENSMUST00000177168; ENSMUST00000176937; ENSMUST00000177525; ENSMUST00000175844; ENSMUST00000220906	Ttll5	protein_coding	protein_coding	tubulin tyrosine ligase-like family, member 5 [Source:MGI Symbol;Acc:MGI:2443657]	0.5044	2646	GO:0036211; GO:0007283; GO:0060041; GO:0030317; GO:0000226; GO:0007288; GO:0009566; GO:0018095	GO:0016881; GO:0046872; GO:0000166; GO:0005524; GO:0016874; GO:0015631; GO:0070740	GO:0005829; GO:0005634; GO:0005737; GO:0005886; GO:0005856; GO:0042995; GO:0005929; GO:0005874; GO:0005813; GO:0036064; GO:0097731	TTLL5	320244	TRUE	-0.167654	0.000865016	0.0206742	chr12
ENSMUSG00000038034	ENSMUST00000155363; ENSMUST00000139528; ENSMUST00000085912; ENSMUST00000128508; ENSMUST00000039506; ENSMUST00000194505; ENSMUST00000195659; ENSMUST00000150598	Igsf8	protein_coding	protein_coding	immunoglobulin superfamily, member 8 [Source:MGI Symbol;Acc:MGI:2154090]	0.5867	1551			GO:0016020; GO:0016021; GO:0043231	IGSF8	140559	TRUE	0.226855	0.00086762	0.0207026	chr1
ENSMUSG00000042671	ENSMUST00000041776; ENSMUST00000124500; ENSMUST00000111815; ENSMUST00000152114; ENSMUST00000111812; ENSMUST00000147700; ENSMUST00000147482; ENSMUST00000111814; ENSMUST00000111810; ENSMUST00000147794	Rgs8	protein_coding	protein_coding	regulator of G-protein signaling 8 [Source:MGI Symbol;Acc:MGI:108408]	0.5302	2245	GO:0007186; GO:0009968; GO:0043547; GO:0007213; GO:0060159; GO:0050790	GO:0005096; GO:0001965	GO:0005634; GO:0045202; GO:0016020; GO:0005886; GO:0042995; GO:0030425; GO:0043204; GO:0032809; GO:0031234	RGS8	67792	TRUE	-0.33677	0.000884422	0.0210399	chr1
ENSMUSG00000075590	ENSMUST00000227605; ENSMUST00000228366; ENSMUST00000228022; ENSMUST00000019516; ENSMUST00000227183; ENSMUST00000227646; ENSMUST00000226444; ENSMUST00000226356; ENSMUST00000228431; ENSMUST00000228419	Nrbp2	protein_coding	protein_coding	nuclear receptor binding protein 2 [Source:MGI Symbol;Acc:MGI:2385017]	0.5803	1516	GO:0006468; GO:0007399; GO:0035556; GO:0030182; GO:0006888; GO:0016242; GO:0043524	GO:0005524; GO:0004672; GO:0004674; GO:0003674	GO:0005737; GO:0012505	NRBP2	223649	TRUE	0.249704	0.000889233	0.0210399	chr15
ENSMUSG00000004902	ENSMUST00000112682	Slc25a18	protein_coding	protein_coding	solute carrier family 25 (mitochondrial carrier), member 18 [Source:MGI Symbol;Acc:MGI:1919053]	0.5358	1911	GO:0055085; GO:1902600; GO:0015813; GO:0015810; GO:0043490; GO:0070778	GO:0015293; GO:0022857; GO:0005313; GO:0015183; GO:0005280	GO:0005737; GO:0016020; GO:0016021; GO:0005739; GO:0005743; GO:0043231	SLC25A18	71803	TRUE	0.224452	0.000891697	0.0210399	chr6
ENSMUSG00000043448	ENSMUST00000108793; ENSMUST00000108790	Gjc2	protein_coding	protein_coding	gap junction protein, gamma 2 [Source:MGI Symbol;Acc:MGI:2153060]	0.6216	2178	GO:0007154; GO:0010628; GO:2000134; GO:0001932; GO:0055085; GO:0009636; GO:0007267; GO:0010644; GO:0070447; GO:1904427; GO:0007420	GO:0005243; GO:1903763	GO:0005922; GO:0016020; GO:0016021; GO:0005886; GO:0070161; GO:0043025; GO:0005921; GO:0043204; GO:0033270; GO:0043209; GO:1990769	GJC2	118454	TRUE	-0.299488	0.000892165	0.0210399	chr11
ENSMUSG00000042514	ENSMUST00000049105; ENSMUST00000122333	Klhl14	protein_coding	protein_coding	kelch-like 14 [Source:MGI Symbol;Acc:MGI:1921249]	0.4734	4220		GO:0005515	GO:0005829; GO:0005737; GO:0016020; GO:0005783; GO:0005789; GO:0043025; GO:0043005; GO:0016235; GO:0015629	KLHL14	225266	TRUE	0.664994	0.000892589	0.0210399	chr18
ENSMUSG00000043969	ENSMUST00000062216; ENSMUST00000174353; ENSMUST00000174573	Emx2	protein_coding	protein_coding	empty spiracles homeobox 2 [Source:MGI Symbol;Acc:MGI:95388]	0.4799	1639	GO:0006355; GO:0010468; GO:0030182; GO:0006357; GO:0009410; GO:0007420; GO:0001764; GO:0009952; GO:0021796; GO:0007417; GO:0030900; GO:0021987; GO:0021846; GO:0021542; GO:0072197; GO:0021885	GO:0003677; GO:0000981; GO:0000978; GO:1990837	GO:0005634	EMX2	13797	TRUE	-1.09013	0.000893118	0.0210399	chr19
ENSMUSG00000019906	ENSMUST00000020057; ENSMUST00000105280; ENSMUST00000218031	Lin7a	protein_coding	protein_coding	lin-7 homolog A, crumbs cell polarity complex component [Source:MGI Symbol;Acc:MGI:2135609]	0.4816	1922	GO:0015031; GO:0006887; GO:0048839; GO:0007269; GO:0048489; GO:0045199; GO:1903361	GO:0005515; GO:0030165; GO:0097016	GO:0045202; GO:0016020; GO:0005886; GO:0045211; GO:0070161; GO:0016323; GO:0098839; GO:0005911; GO:0005923; GO:0098793; GO:0030658; GO:0097025	LIN7A	108030	TRUE	-0.26099	0.000893737	0.0210399	chr10
ENSMUSG00000047143	ENSMUST00000061187	Dmrta2	protein_coding	protein_coding	doublesex and mab-3 related transcription factor like family A2 [Source:MGI Symbol;Acc:MGI:2653629]	0.654	2922	GO:0006355; GO:0048863; GO:0006357; GO:0035914; GO:0002052; GO:0007405; GO:0007548; GO:0021796; GO:0048665; GO:0048866; GO:0071542	GO:0043565; GO:0005515; GO:0003677; GO:0046872; GO:0000978; GO:0000981; GO:0042802; GO:1990837	GO:0005634	DMRTA2	242620	TRUE	-1.70585	0.000894357	0.0210399	chr4
ENSMUSG00000020241	ENSMUST00000001181; ENSMUST00000105413; ENSMUST00000137365	Col6a2	protein_coding	protein_coding	collagen, type VI, alpha 2 [Source:MGI Symbol;Acc:MGI:88460]	0.5704	4505	GO:0007155; GO:0009749	GO:0005518; GO:0030020	GO:0016020; GO:0005615; GO:0110165; GO:0032991; GO:0005576; GO:0062023; GO:0031012; GO:0042383; GO:0005581	COL6A2	12834	TRUE	-0.505553	0.000894876	0.0210399	chr10
ENSMUSG00000025176	ENSMUST00000168414; ENSMUST00000172244; ENSMUST00000081714; ENSMUST00000167381	Hoga1	protein_coding	protein_coding	4-hydroxy-2-oxoglutarate aldolase 1 [Source:MGI Symbol;Acc:MGI:1914682]	0.5614	921	GO:0009436; GO:0042866; GO:0046487; GO:0019470; GO:0033609	GO:0016829; GO:0042803; GO:0008700; GO:0106009	GO:0005739	HOGA1	67432	TRUE	0.887561	0.000896403	0.0210399	chr19
ENSMUSG00000024241	ENSMUST00000068714; ENSMUST00000234841	Sos1	protein_coding	protein_coding	SOS Ras/Rac guanine nucleotide exchange factor 1 [Source:MGI Symbol;Acc:MGI:98354]	0.432	6994	GO:0007264; GO:0035264; GO:0006357; GO:0003007; GO:0042127; GO:0001942; GO:0065008; GO:0007265; GO:0043547; GO:0060021; GO:0048514; GO:0051057; GO:0008543; GO:0007173; GO:0003209; GO:0001782; GO:0002260; GO:0048011; GO:0061029; GO:0003344; GO:0042129; GO:0007296; GO:0033081; GO:2000973; GO:0043405; GO:0045742; GO:0046579; GO:0061384; GO:1904693	GO:0003677; GO:0005085; GO:0005515; GO:0046982; GO:0017124	GO:0014069; GO:0005737; GO:0005886; GO:0043025; GO:0005829; GO:1905360	SOS1	20662	TRUE	-0.28229	0.000898705	0.0210399	chr17
ENSMUSG00000049281	ENSMUST00000049941; ENSMUST00000176169; ENSMUST00000176185; ENSMUST00000175873; ENSMUST00000176634; ENSMUST00000171835; ENSMUST00000114956; ENSMUST00000176547; ENSMUST00000216398	Scn3b	protein_coding	protein_coding	sodium channel, voltage-gated, type III, beta [Source:MGI Symbol;Acc:MGI:1918882]	0.4984	2242	GO:0061337; GO:0006811; GO:0034765; GO:0006814; GO:0051899; GO:0072659; GO:0035725; GO:2000649; GO:0086002; GO:0060048; GO:0010765; GO:0086091; GO:0060371; GO:0060373; GO:0086005; GO:0086010; GO:0086014; GO:0086012; GO:0007399; GO:0019233; GO:0086015; GO:0010460; GO:0034220	GO:0005244; GO:0005272; GO:0044325; GO:0017080; GO:0019871; GO:0086006	GO:0016020; GO:0016021; GO:0005886; GO:0001518; GO:0030018	SCN3B	235281	TRUE	0.294767	0.000900284	0.0210399	chr9
ENSMUSG00000042688	ENSMUST00000173230; ENSMUST00000168937; ENSMUST00000049355; ENSMUST00000174034; ENSMUST00000172946; ENSMUST00000173460; ENSMUST00000172665	Mapk6	protein_coding	protein_coding	mitogen-activated protein kinase 6 [Source:MGI Symbol;Acc:MGI:1354946]	0.4893	1945	GO:0006468; GO:0016310; GO:0007049; GO:0035556; GO:0000165; GO:0060999	GO:0005524; GO:0004672; GO:0005515; GO:0016740; GO:0000166; GO:0016301; GO:0004674; GO:0004707; GO:0106310; GO:0046982; GO:0019901	GO:0005829; GO:0005737; GO:0005634; GO:0032991; GO:0032156	MAPK6	50772	TRUE	-0.224869	0.000900458	0.0210399	chr9
ENSMUSG00000053025	ENSMUST00000165175; ENSMUST00000085164; ENSMUST00000206344; ENSMUST00000207001; ENSMUST00000206845; ENSMUST00000206675; ENSMUST00000206236	Sv2b	protein_coding	protein_coding	synaptic vesicle glycoprotein 2 b [Source:MGI Symbol;Acc:MGI:1927338]	0.4713	2831	GO:0055085; GO:0007268; GO:0006836	GO:0022857	GO:0016021; GO:0016020; GO:0031410; GO:0045202; GO:0008021; GO:0043005; GO:0030672; GO:0001669; GO:0030285	SV2B	64176	TRUE	0.251533	0.000907516	0.021171	chr7
ENSMUSG00000066800	ENSMUST00000086209; ENSMUST00000182722; ENSMUST00000183241; ENSMUST00000182131; ENSMUST00000182538; ENSMUST00000182016	Rnasel	protein_coding	protein_coding	ribonuclease L (2', 5'-oligoisoadenylate synthetase-dependent) [Source:MGI Symbol;Acc:MGI:1098272]	0.4661	2480	GO:0006468; GO:0006397; GO:0045944; GO:0090501; GO:0090305; GO:0051607; GO:0045071; GO:0046326; GO:0045444; GO:0043488; GO:0006364; GO:0006396	GO:0005515; GO:0005524; GO:0004672; GO:0004540; GO:0003723; GO:0043021; GO:0046872; GO:0016787; GO:0000166; GO:0004518; GO:0042802; GO:0004519; GO:0019843	GO:0005737; GO:0005739; GO:0016363	RNASEL	24014	TRUE	-0.553116	0.000910551	0.0211849	chr1
ENSMUSG00000020607	ENSMUST00000020926; ENSMUST00000221405	Lratd1	protein_coding	protein_coding	LRAT domain containing 1 [Source:MGI Symbol;Acc:MGI:2145011]	0.5388	2268	GO:0000902; GO:0048870			LRATD1	105005	TRUE	-0.175237	0.000911006	0.0211849	chr12
ENSMUSG00000022150	ENSMUST00000159552; ENSMUST00000078019; ENSMUST00000159046; ENSMUST00000161040; ENSMUST00000162140; ENSMUST00000080880; ENSMUST00000110664; ENSMUST00000110663; ENSMUST00000161812; ENSMUST00000160134; ENSMUST00000159490; ENSMUST00000162094; ENSMUST00000163082; ENSMUST00000161558	Dab2	protein_coding	protein_coding	disabled 2, mitogen-responsive phosphoprotein [Source:MGI Symbol;Acc:MGI:109175]	0.4455	1921	GO:0000122; GO:0001934; GO:0006897; GO:0010718; GO:0010862; GO:0010977; GO:0016192; GO:0030308; GO:0030335; GO:0030511; GO:0032091; GO:0032349; GO:0032436; GO:0035026; GO:0043066; GO:0045807; GO:0045944; GO:0048268; GO:0048545; GO:0050680; GO:0060391; GO:0060766; GO:0070373; GO:0071364; GO:0071560; GO:0090090; GO:1900026; GO:1902074; GO:1903077; GO:2000096; GO:2000298; GO:2000370; GO:2000643; GO:…	GO:0008022; GO:0035615; GO:0038024; GO:0046332; GO:0050750	GO:0001650; GO:0005886; GO:0005905; GO:0030136; GO:0030665; GO:0043231; GO:0048471	DAB2	13132	TRUE	-0.271116	0.000912516	0.0211863	chr15
ENSMUSG00000037833	ENSMUST00000070328; ENSMUST00000096000; ENSMUST00000225854	Sh2d4b	protein_coding	protein_coding	SH2 domain containing 4B [Source:MGI Symbol;Acc:MGI:1925182]	0.5098	1944			GO:0005737	SH2D4B	328381	TRUE	0.656584	0.000915964	0.0212327	chr14
ENSMUSG00000033671	ENSMUST00000138762; ENSMUST00000132189; ENSMUST00000129865; ENSMUST00000146987; ENSMUST00000124495; ENSMUST00000192899	Cep350	protein_coding	protein_coding	centrosomal protein 350 [Source:MGI Symbol;Acc:MGI:1921331]	0.4487	3470	GO:0034453; GO:0071539; GO:1905515	GO:0008017; GO:0005515	GO:0005634; GO:0005737; GO:0005815; GO:0005856; GO:0042995; GO:0005813; GO:0005819; GO:0005814	CEP350	74081	TRUE	-0.161896	0.000918828	0.0212476	chr1
ENSMUSG00000031954	ENSMUST00000034432	Cfdp1	protein_coding	protein_coding	craniofacial development protein 1 [Source:MGI Symbol;Acc:MGI:1344403]	0.466	1178	GO:0042127; GO:0006338; GO:0007155; GO:0008360; GO:0044346; GO:2000270		GO:0000812; GO:0005634; GO:0000775; GO:0000776; GO:0005694; GO:0005604	CFDP1	23837	TRUE	0.151808	0.000919513	0.0212476	chr8
ENSMUSG00000022403	ENSMUST00000172107; ENSMUST00000023039; ENSMUST00000165582; ENSMUST00000229847; ENSMUST00000163382; ENSMUST00000230906; ENSMUST00000169204	St13	protein_coding	protein_coding	suppression of tumorigenicity 13 [Source:MGI Symbol;Acc:MGI:1917606]	0.4707	1827	GO:0009617; GO:0051085; GO:0061084	GO:0005515; GO:0046983; GO:0044877; GO:0042802; GO:0019904; GO:0051087; GO:0051082; GO:0030544; GO:0032564	GO:0005829; GO:0005737; GO:0032991	ST13,ST13P4,ST13P5	70356	TRUE	-0.133199	0.000930348	0.0214388	chr15
ENSMUSG00000022961	ENSMUST00000117633; ENSMUST00000119368; ENSMUST00000140312; ENSMUST00000114037; ENSMUST00000114036; ENSMUST00000122302; ENSMUST00000147891; ENSMUST00000133589; ENSMUST00000129167; ENSMUST00000232108; ENSMUST00000147461; ENSMUST00000145235; ENSMUST00000146079; ENSMUST00000151503	Son	protein_coding	protein_coding	Son DNA binding protein [Source:MGI Symbol;Acc:MGI:98353]	0.4506	4069	GO:0051726; GO:0043484; GO:0000226; GO:0000281; GO:0006397; GO:0043066; GO:0048024; GO:0008380; GO:0007049	GO:0003676; GO:0003723; GO:0005515; GO:0003677; GO:0050733	GO:0016607; GO:0005634	SON	20658	TRUE	-0.101812	0.000930718	0.0214388	chr16
ENSMUSG00000052504	ENSMUST00000064405; ENSMUST00000232049; ENSMUST00000232654; ENSMUST00000232461; ENSMUST00000231270; ENSMUST00000232370	Epha3	protein_coding	protein_coding	Eph receptor A3 [Source:MGI Symbol;Acc:MGI:99612]	0.4438	2508	GO:0006468; GO:0007169; GO:0048013; GO:0010976; GO:0018108; GO:0032956; GO:0043087; GO:0045806; GO:0051893; GO:0070507; GO:0071300; GO:1903078	GO:0005515; GO:0005524; GO:0004672; GO:0005003; GO:0000166; GO:0004713; GO:0004714; GO:0005004	GO:0016021; GO:0016020; GO:0005887; GO:0005654; GO:0005769; GO:0005829; GO:0005886; GO:0015629; GO:0031965	EPHA3	13837	TRUE	0.404379	0.000940764	0.0216361	chr16
ENSMUSG00000110067	ENSMUST00000211105; ENSMUST00000238915	6330411D24Rik	protein_coding	protein_coding	RIKEN cDNA 6330411D24 gene [Source:MGI Symbol;Acc:MGI:1917975]	0.5288	908	GO:0008150	GO:0003674	GO:0005575		70725	TRUE	-1.38071	0.000946468	0.0217331	chr4
ENSMUSG00000028051	ENSMUST00000029686; ENSMUST00000132156; ENSMUST00000127654; ENSMUST00000133368	Hcn3	protein_coding	protein_coding	hyperpolarization-activated, cyclic nucleotide-gated K+ 3 [Source:MGI Symbol;Acc:MGI:1298211]	0.5858	1518	GO:0055085; GO:0006811; GO:0006813; GO:0034765; GO:0071805; GO:0006814; GO:0035725; GO:0042391; GO:0003254; GO:0071320; GO:0072718; GO:1903351; GO:0086091; GO:0098907; GO:2001257	GO:0005216; GO:0005515; GO:0000166; GO:0005244; GO:0005249; GO:0005267; GO:0030552; GO:0005272; GO:0005248	GO:0016020; GO:0045202; GO:0030424; GO:0016021; GO:0005886; GO:0110165; GO:0043025; GO:0005887; GO:0030425; GO:0044316; GO:0098855	HCN3	15168	TRUE	0.290013	0.000953639	0.0218635	chr3
ENSMUSG00000023904	ENSMUST00000180140; ENSMUST00000024697; ENSMUST00000179928	Hcfc1r1	protein_coding	protein_coding	host cell factor C1 regulator 1 (XPO1-dependent) [Source:MGI Symbol;Acc:MGI:2663619]	0.5889	745	GO:0008150	GO:0003674	GO:0005654; GO:0005634; GO:0005737	HCFC1R1	353502	TRUE	0.174195	0.000957137	0.0219093	chr17
ENSMUSG00000032452	ENSMUST00000035027; ENSMUST00000162295	Clstn2	protein_coding	protein_coding	calsyntenin 2 [Source:MGI Symbol;Acc:MGI:1929897]	0.5214	4270	GO:0007156; GO:0007155; GO:0051965; GO:0050806	GO:0005509; GO:0001540; GO:0019894; GO:0042988	GO:0016020; GO:0014069; GO:0016021; GO:0000139; GO:0005794; GO:0005886; GO:0005783; GO:0005789; GO:0009986; GO:0045202; GO:0045211; GO:0042995; GO:0030425; GO:0098978; GO:0098794; GO:0099061	CLSTN2	64085	TRUE	-0.188632	0.000963469	0.0220198	chr9
ENSMUSG00000028692	ENSMUST00000030455; ENSMUST00000126146; ENSMUST00000128010; ENSMUST00000128059	Akr1a1	protein_coding	protein_coding	aldo-keto reductase family 1, member A1 (aldehyde reductase) [Source:MGI Symbol;Acc:MGI:1929955]	0.4941	1197	GO:0006629; GO:0044597; GO:0044598; GO:0019853; GO:0110095; GO:0046185; GO:0019640; GO:0042840	GO:0016491; GO:0004032; GO:0047655; GO:0047956; GO:0008106; GO:0047939; GO:0047941; GO:0016657; GO:0019726; GO:1990002	GO:0005829; GO:0005737; GO:0016020; GO:0005886; GO:0016324; GO:0045202	AKR1A1	58810	TRUE	0.106597	0.000978686	0.0223327	chr4
ENSMUSG00000029416	ENSMUST00000031367; ENSMUST00000124569; ENSMUST00000153832; ENSMUST00000198486; ENSMUST00000144603; ENSMUST00000200212; ENSMUST00000199810; ENSMUST00000152727; ENSMUST00000198727; ENSMUST00000155321; ENSMUST00000182841	Slc15a4	protein_coding	protein_coding	solute carrier family 15, member 4 [Source:MGI Symbol;Acc:MGI:2140796]	0.5252	1236	GO:0055085; GO:0006857; GO:0015031; GO:0002376; GO:0045087; GO:1902600; GO:0045089; GO:0034157; GO:0034161; GO:0015833; GO:0034165; GO:0015835; GO:0070434; GO:0140206; GO:0015817; GO:0033023; GO:0048302; GO:0070424; GO:0070430; GO:0089708	GO:0022857; GO:0015293; GO:0005290; GO:0015647; GO:0071916; GO:0015333	GO:0016020; GO:0016021; GO:0005764; GO:0005768; GO:0005765; GO:0010008; GO:0031901; GO:1905103; GO:0036020; GO:0031303	SLC15A4	100561	TRUE	-0.264371	0.000983689	0.0224119	chr5
ENSMUSG00000039682	ENSMUST00000046122; ENSMUST00000137699; ENSMUST00000198534; ENSMUST00000135413; ENSMUST00000131289; ENSMUST00000146811	Lap3	protein_coding	protein_coding	leucine aminopeptidase 3 [Source:MGI Symbol;Acc:MGI:1914238]	0.4812	877	GO:0006508; GO:0019538	GO:0070006; GO:0046872; GO:0016787; GO:0008233; GO:0004177; GO:0030145; GO:0004180	GO:0005739; GO:0005829; GO:0005654; GO:0005737; GO:0030496; GO:0005802	LAP3	66988	TRUE	-0.171716	0.000987106	0.0224479	chr5
ENSMUSG00000030519	ENSMUST00000032732; ENSMUST00000205613; ENSMUST00000205604; ENSMUST00000206246; ENSMUST00000205551; ENSMUST00000206061; ENSMUST00000206630	Apba2	protein_coding	protein_coding	amyloid beta (A4) precursor protein-binding, family A, member 2 [Source:MGI Symbol;Acc:MGI:1261791]	0.575	1411	GO:0001701; GO:0010468; GO:0035264; GO:0007626; GO:0007268; GO:0015031; GO:2000300	GO:0005515; GO:0001540; GO:0042802	GO:0005886; GO:0005737; GO:0008021; GO:0043197; GO:0098685	APBA2	11784	TRUE	0.205513	0.000988339	0.0224479	chr7
ENSMUSG00000047759	ENSMUST00000058652	Hs3st3a1	protein_coding	protein_coding	heparan sulfate (glucosamine) 3-O-sulfotransferase 3A1 [Source:MGI Symbol;Acc:MGI:1333861]	0.544	3939	GO:0001658; GO:0015012; GO:0006024	GO:0008146; GO:0016740; GO:0008467	GO:0005575; GO:0016020; GO:0016021; GO:0000139; GO:0005794	HS3ST3A1	15478	TRUE	0.571475	0.000993993	0.0225413	chr11
ENSMUSG00000036790	ENSMUST00000166241; ENSMUST00000036043	Slitrk2	protein_coding	protein_coding	SLIT and NTRK-like family, member 2 [Source:MGI Symbol;Acc:MGI:2679449]	0.425	5380	GO:0007409; GO:0099560; GO:0051965; GO:0050807; GO:1905606	GO:0005515	GO:0016020; GO:0016021; GO:0005886; GO:0098978; GO:0098982; GO:0099055	SLITRK2	245450	TRUE	-0.288939	0.00100651	0.0227899	chrX
ENSMUSG00000079523	ENSMUST00000114050; ENSMUST00000114049; ENSMUST00000114048; ENSMUST00000144337	Tmsb10	protein_coding	protein_coding	thymosin, beta 10 [Source:MGI Symbol;Acc:MGI:109146]	0.5788	579	GO:0007015; GO:0030334; GO:0042989; GO:0030036	GO:0003785; GO:0003779	GO:0005737; GO:0005856	TMSB10	19240	TRUE	0.184012	0.00102099	0.0230679	chr6
ENSMUSG00000031376	ENSMUST00000033744; ENSMUST00000088429; ENSMUST00000114479	Atp2b3	protein_coding	protein_coding	ATPase, Ca++ transporting, plasma membrane 3 [Source:MGI Symbol;Acc:MGI:1347353]	0.5385	4338	GO:0006811; GO:0006816; GO:0070588; GO:0051480; GO:0006874; GO:0099509; GO:1990034	GO:0005388; GO:0005524; GO:0000166; GO:0016887; GO:0030165; GO:0015085; GO:0019829; GO:1905056	GO:0016020; GO:0016021; GO:0005886; GO:0005887; GO:0043231; GO:0098978; GO:0045121; GO:0098688; GO:0098982; GO:0099056; GO:1990032	ATP2B3	320707	TRUE	-0.186346	0.00102195	0.0230679	chrX
ENSMUSG00000074238	ENSMUST00000200409; ENSMUST00000051737; ENSMUST00000198626; ENSMUST00000197450; ENSMUST00000199901; ENSMUST00000197744; ENSMUST00000196687; ENSMUST00000200238; ENSMUST00000197471; ENSMUST00000196392	Ap1ar	protein_coding	protein_coding	adaptor-related protein complex 1 associated regulatory protein [Source:MGI Symbol;Acc:MGI:2384822]	0.4833	1596	GO:0034315; GO:0048203; GO:1900025; GO:2000146; GO:0001920; GO:0008104; GO:0034446	GO:0035650; GO:0019894; GO:0071933	GO:0005794; GO:0005829; GO:0005768; GO:0030133	AP1AR	211556	TRUE	-0.159859	0.00102475	0.0230955	chr3
ENSMUSG00000029725	ENSMUST00000126126; ENSMUST00000031739; ENSMUST00000198929; ENSMUST00000152298	Ppp1r35	protein_coding	protein_coding	protein phosphatase 1, regulatory subunit 35 [Source:MGI Symbol;Acc:MGI:1922853]	0.6206	556	GO:0010923; GO:0045724; GO:1903724; GO:0048570	GO:0019902; GO:0004864	GO:0005737; GO:0005856; GO:0005814; GO:0005815; GO:0005813	PPP1R35	69871	TRUE	0.255885	0.00102677	0.0231054	chr5
ENSMUSG00000055214	ENSMUST00000065967; ENSMUST00000125404; ENSMUST00000111167; ENSMUST00000144340; ENSMUST00000156184; ENSMUST00000111166	Pld5	protein_coding	protein_coding	phospholipase D family, member 5 [Source:MGI Symbol;Acc:MGI:2442056]	0.4673	2927	GO:0008150	GO:0003824; GO:0003674	GO:0005575; GO:0005737; GO:0016020; GO:0016021; GO:0043229; GO:0031090	PLD5	319455	TRUE	-0.621629	0.00102912	0.0231227	chr1
ENSMUSG00000052921	ENSMUST00000065040; ENSMUST00000108671; ENSMUST00000131686; ENSMUST00000151520; ENSMUST00000141747; ENSMUST00000108670	Arhgef15	protein_coding	protein_coding	Rho guanine nucleotide exchange factor (GEF) 15 [Source:MGI Symbol;Acc:MGI:3045246]	0.5728	2186	GO:0050790; GO:0090630; GO:0051496; GO:0061299; GO:2000297	GO:0005085; GO:0005096	GO:0005737; GO:0042995; GO:0030425	ARHGEF15	442801	TRUE	0.164528	0.0010332	0.023168	chr11
ENSMUSG00000048482	ENSMUST00000053317; ENSMUST00000111051; ENSMUST00000111047; ENSMUST00000111049; ENSMUST00000111046; ENSMUST00000111050; ENSMUST00000176893; ENSMUST00000111045; ENSMUST00000111043; ENSMUST00000111044; ENSMUST00000111042	Bdnf	protein_coding	protein_coding	brain derived neurotrophic factor [Source:MGI Symbol;Acc:MGI:88145]	0.405	3939	GO:0043066; GO:0043524; GO:0045666; GO:0048675; GO:0051402; GO:0009410; GO:0060548; GO:0007623; GO:0007399; GO:0007416; GO:0001662; GO:0033138; GO:0097484; GO:0038180; GO:0051091; GO:0016358; GO:0048839; GO:0007214; GO:0051965; GO:0050804; GO:0014047; GO:0060079; GO:0007611; GO:0048167; GO:0048169; GO:0007631; GO:0018105; GO:0007411; GO:0043523; GO:1901215; GO:0007412; GO:0032229; GO:0007169; GO:…	GO:0005102; GO:0005515; GO:0008083; GO:0005163; GO:0005169	GO:0005739; GO:0016607; GO:0030424; GO:0005737; GO:0005615; GO:0005576; GO:0043025; GO:0048471; GO:0031410; GO:0030425; GO:0030141; GO:0043204; GO:0043195; GO:0008021; GO:0098794; GO:0030061; GO:0005788	BDNF	12064	TRUE	-0.571716	0.0010343	0.023168	chr2
ENSMUSG00000064225	ENSMUST00000079597	Paqr9	protein_coding	protein_coding	progestin and adipoQ receptor family member IX [Source:MGI Symbol;Acc:MGI:1922802]	0.4689	8367		GO:0008289; GO:0038023; GO:0005496	GO:0016021; GO:0016020; GO:0005886	PAQR9	75552	TRUE	-0.158573	0.0010477	0.0234323	chr9
ENSMUSG00000037493	ENSMUST00000041901	Cib2	protein_coding	protein_coding	calcium and integrin binding family member 2 [Source:MGI Symbol;Acc:MGI:1929293]	0.5394	1433	GO:0007204; GO:0055074; GO:0071318; GO:0045494	GO:0005509; GO:0044877; GO:0046872; GO:0042803; GO:0000287; GO:0005178	GO:0005737; GO:0016020; GO:0005886; GO:0042995; GO:0042383; GO:0031594; GO:0005829; GO:0032420; GO:0001917; GO:0032437; GO:0001750; GO:0071944; GO:0005927	CIB2	56506	TRUE	0.161567	0.00105177	0.0234875	chr9
ENSMUSG00000029771	ENSMUST00000004392; ENSMUST00000167252; ENSMUST00000164626; ENSMUST00000163511; ENSMUST00000164922; ENSMUST00000171527	Irf5	protein_coding	protein_coding	interferon regulatory factor 5 [Source:MGI Symbol;Acc:MGI:1350924]	0.5622	1213	GO:0006355; GO:0045944; GO:0006357; GO:0051607; GO:0002376; GO:0045893; GO:0019221; GO:0006954; GO:0045087; GO:0043065; GO:0032481; GO:0032494; GO:0032495	GO:0003700; GO:0000976; GO:0043565; GO:0005515; GO:0003677; GO:0000978; GO:0000981; GO:0001228; GO:0042802; GO:1990837; GO:0019901	GO:0005634; GO:0005737	IRF5	27056	TRUE	0.453549	0.00105924	0.0236182	chr6
ENSMUSG00000050473	ENSMUST00000059805	Slc35d3	protein_coding	protein_coding	solute carrier family 35, member D3 [Source:MGI Symbol;Acc:MGI:1923407]	0.5399	2630	GO:0097009; GO:0055085; GO:0008643; GO:0032527; GO:0015787; GO:0015789; GO:1990569; GO:0070863	GO:0005515; GO:0005461; GO:0005462; GO:0005463; GO:0015297	GO:0016020; GO:0016021; GO:0005794; GO:0005783; GO:0005769	SLC35D3	76157	TRUE	-0.507921	0.00107181	0.0238621	chr10
ENSMUSG00000040867	ENSMUST00000209829; ENSMUST00000190647; ENSMUST00000239108; ENSMUST00000238841; ENSMUST00000187230; ENSMUST00000185745	Begain	protein_coding	protein_coding	brain-enriched guanylate kinase-associated [Source:MGI Symbol;Acc:MGI:3044626]	0.6416	1920	GO:0098962; GO:0098817	GO:0003674	GO:0016020; GO:0005634; GO:0045202; GO:0005737; GO:0043025; GO:0030425; GO:0098978; GO:0098793; GO:0098794	BEGAIN	380785	TRUE	0.160389	0.00107644	0.0239286	chr12
ENSMUSG00000018858	ENSMUST00000153983; ENSMUST00000106539; ENSMUST00000103036; ENSMUST00000128632; ENSMUST00000122946; ENSMUST00000133192; ENSMUST00000135619; ENSMUST00000021079; ENSMUST00000155134; ENSMUST00000134386	Mrpl58	protein_coding	protein_coding	mitochondrial ribosomal protein L58 [Source:MGI Symbol;Acc:MGI:1915822]	0.5448	952	GO:0006415; GO:0006412; GO:0032543; GO:0070126	GO:0003747; GO:0016787; GO:0004045; GO:0016150	GO:0005739; GO:0005762; GO:0005654; GO:0005886; GO:0005840; GO:1990904; GO:0005743	MRPL58	68572	TRUE	0.149651	0.0010803	0.0239781	chr11
ENSMUSG00000071176	ENSMUST00000084207; ENSMUST00000160619; ENSMUST00000161162; ENSMUST00000110800; ENSMUST00000163062; ENSMUST00000162444; ENSMUST00000162636	Arhgef10	protein_coding	protein_coding	Rho guanine nucleotide exchange factor (GEF) 10 [Source:MGI Symbol;Acc:MGI:2444453]	0.5388	3263	GO:0030036; GO:0035023; GO:0022011; GO:0090307; GO:0090630; GO:0051298; GO:0051496; GO:0050790	GO:0005085; GO:0019894	GO:0005813; GO:0005829	ARHGEF10	234094	TRUE	-0.227994	0.00108528	0.024052	chr8
ENSMUSG00000021047	ENSMUST00000021438; ENSMUST00000219886; ENSMUST00000219330; ENSMUST00000218829; ENSMUST00000220258	Nova1	protein_coding	protein_coding	NOVA alternative splicing regulator 1 [Source:MGI Symbol;Acc:MGI:104297]	0.39	2024	GO:0007399; GO:0008380; GO:0006397; GO:0010468; GO:0000398; GO:0050684; GO:0000381; GO:0051252; GO:0120163	GO:0003723; GO:0003730; GO:0005515; GO:0003729; GO:0003676; GO:1990825	GO:0005634; GO:0005730; GO:0005654; GO:0043231; GO:0005737	NOVA1	664883	TRUE	-0.438383	0.00108967	0.0241128	chr12
ENSMUSG00000046167	ENSMUST00000056740	Gldn	protein_coding	protein_coding	gliomedin [Source:MGI Symbol;Acc:MGI:2388361]	0.4618	4658	GO:0007399; GO:0030154; GO:0007165; GO:0045162; GO:0032528; GO:0034113	GO:0005515; GO:0086080	GO:0016020; GO:0016021; GO:0005886; GO:0005615; GO:0009986; GO:0005576; GO:0042995; GO:0030424; GO:0005581	GLDN	235379	TRUE	0.679972	0.0010964	0.0241888	chr9
ENSMUSG00000029223	ENSMUST00000031131; ENSMUST00000177194; ENSMUST00000176015; ENSMUST00000202339	Uchl1	protein_coding	protein_coding	ubiquitin carboxy-terminal hydrolase L1 [Source:MGI Symbol;Acc:MGI:103149]	0.5808	719	GO:0006511; GO:0055001; GO:0071466; GO:0006508; GO:0016579; GO:0019233; GO:0007628; GO:0007409; GO:0043407; GO:0042755; GO:0002931; GO:0007412; GO:0050905; GO:0019896; GO:0002176	GO:0004843; GO:0016787; GO:0008233; GO:0008234; GO:0004197; GO:0043130; GO:0031625; GO:0016874; GO:0031694; GO:0008242	GO:0005829; GO:0005737; GO:0030424; GO:0005654; GO:0016020; GO:0005886; GO:0005783; GO:0005789; GO:0043025; GO:0043209; GO:1904115; GO:0044306	UCHL1	22223	TRUE	0.177183	0.00109727	0.0241888	chr5
ENSMUSG00000026749	ENSMUST00000054234; ENSMUST00000112902; ENSMUST00000112895; ENSMUST00000151683; ENSMUST00000156726	Nek6	protein_coding	protein_coding	NIMA (never in mitosis gene a)-related expressed kinase 6 [Source:MGI Symbol;Acc:MGI:1891638]	0.5271	3149	GO:0006468; GO:0016310; GO:0007049; GO:0051301; GO:0006915; GO:0030071; GO:0046777; GO:0007059; GO:0018105	GO:0005524; GO:0004672; GO:0016740; GO:0046872; GO:0000166; GO:0016301; GO:0004674; GO:0000287; GO:0019894; GO:0106310; GO:0019901; GO:0140297; GO:0031625; GO:0001222	GO:0005634; GO:0005829; GO:0005737; GO:0005654; GO:0032991; GO:0005815; GO:0005856; GO:0034451; GO:0016607; GO:0005813; GO:0000922	NEK6	59126	TRUE	0.186356	0.00109933	0.0241888	chr2
ENSMUSG00000031391	ENSMUST00000114430; ENSMUST00000102871; ENSMUST00000066576; ENSMUST00000144478; ENSMUST00000124560; ENSMUST00000145805; ENSMUST00000135104; ENSMUST00000130110; ENSMUST00000155246; ENSMUST00000148250; ENSMUST00000129612; ENSMUST00000141221; ENSMUST00000146790	L1cam	protein_coding	protein_coding	L1 cell adhesion molecule [Source:MGI Symbol;Acc:MGI:96721]	0.5279	1659	GO:0007160; GO:0007411; GO:0016477; GO:0031175; GO:0050808; GO:0061564	GO:0005515; GO:0019904	GO:0016020; GO:0016021; GO:0043005; GO:0005886; GO:0009986; GO:0030424; GO:0043025	L1CAM	16728	TRUE	0.19789	0.00109972	0.0241888	chrX
ENSMUSG00000030103	ENSMUST00000032194; ENSMUST00000166346; ENSMUST00000163617; ENSMUST00000204550	Bhlhe40	protein_coding	protein_coding	basic helix-loop-helix family, member e40 [Source:MGI Symbol;Acc:MGI:1097714]	0.5138	1644	GO:0006355; GO:0000122; GO:0006357; GO:0009952; GO:0048511; GO:0045892; GO:0007623; GO:0043433; GO:0032922; GO:0042752; GO:0009416; GO:0043153; GO:0050767	GO:0003677; GO:0046983; GO:0005515; GO:0000978; GO:0001227; GO:0000981; GO:0042803; GO:1990837; GO:0019904; GO:0046982; GO:0070888; GO:0043425; GO:0043426; GO:0061629	GO:0005634; GO:0016604; GO:0005737; GO:0005654	BHLHE40	20893	TRUE	0.280812	0.00110297	0.024223	chr6
ENSMUSG00000038167	ENSMUST00000042647	Plekhg6	protein_coding	protein_coding	pleckstrin homology domain containing, family G (with RhoGef domain) member 6 [Source:MGI Symbol;Acc:MGI:2682298]	0.5929	3299	GO:0008150; GO:0050790	GO:0005085; GO:0003674; GO:0005096	GO:0005737; GO:0005856; GO:0042995; GO:0030054; GO:0005819; GO:0032154; GO:0005813; GO:0005902	PLEKHG6	213522	TRUE	1.98588	0.00110458	0.024223	chr6
ENSMUSG00000025885	ENSMUST00000125882; ENSMUST00000135878; ENSMUST00000074157; ENSMUST00000120161; ENSMUST00000121875; ENSMUST00000125751; ENSMUST00000140904; ENSMUST00000177366; ENSMUST00000122914; ENSMUST00000146253; ENSMUST00000154986	Myo5b	protein_coding	protein_coding	myosin VB [Source:MGI Symbol;Acc:MGI:106598]	0.5148	2055	GO:0016192; GO:0016197	GO:0005524; GO:0003774; GO:0000166; GO:0003779; GO:0005515; GO:0031267	GO:0016459; GO:0110165; GO:0032991; GO:0045179	MYO5B	17919	TRUE	-1.29302	0.0011152	0.0244191	chr18
ENSMUSG00000053460	ENSMUST00000065906; ENSMUST00000205738; ENSMUST00000207012; ENSMUST00000132995; ENSMUST00000207000	Ggcx	protein_coding	protein_coding	gamma-glutamyl carboxylase [Source:MGI Symbol;Acc:MGI:1927655]	0.5153	1477	GO:0017187	GO:0008488; GO:0016829; GO:0019842	GO:0016020; GO:0016021; GO:0005783; GO:0005789; GO:0043231	GGCX	56316	TRUE	-0.216846	0.00111822	0.0244487	chr6
ENSMUSG00000030138	ENSMUST00000032237; ENSMUST00000205207; ENSMUST00000203444	Bms1	protein_coding	protein_coding	BMS1, ribosome biogenesis factor [Source:MGI Symbol;Acc:MGI:2446132]	0.5089	2612	GO:0042254; GO:0000462; GO:0000479	GO:0005525; GO:0003924; GO:0034511	GO:0005634; GO:0005730; GO:0005654; GO:0030686; GO:0005694	BMS1	213895	TRUE	-0.176241	0.0011229	0.0245144	chr6
ENSMUSG00000033282	ENSMUST00000047783; ENSMUST00000139113; ENSMUST00000210538; ENSMUST00000209616; ENSMUST00000136198; ENSMUST00000211185; ENSMUST00000209564; ENSMUST00000132757	Rpgrip1l	protein_coding	protein_coding	Rpgrip1-like [Source:MGI Symbol;Acc:MGI:1920563]	0.4262	2768	GO:0001701; GO:0007163; GO:0043010; GO:0007420; GO:0001736; GO:0032502; GO:0001822; GO:1905515; GO:0060271; GO:0007368; GO:0021772; GO:0035116; GO:0043584; GO:0001889; GO:0021549; GO:0022038; GO:0035108; GO:0090102; GO:0008589; GO:0021532; GO:0060039; GO:0045744; GO:0035115; GO:0060322; GO:0021537; GO:0021670; GO:0046548	GO:0005515; GO:0031870	GO:0005829; GO:0005737; GO:0005654; GO:0005886; GO:0005815; GO:0070161; GO:0005856; GO:0042995; GO:0005911; GO:0005929; GO:0005923; GO:0035869; GO:0005813; GO:0032391; GO:0005930; GO:0005879; GO:0036064; GO:0035253	RPGRIP1L	244585	TRUE	-0.205173	0.00112958	0.0246235	chr8
ENSMUSG00000049686	ENSMUST00000051016; ENSMUST00000121652; ENSMUST00000152213	Orai1	protein_coding	protein_coding	ORAI calcium release-activated calcium modulator 1 [Source:MGI Symbol;Acc:MGI:1925542]	0.6118	1474	GO:0006811; GO:0006816; GO:0070588; GO:0002376; GO:0002250; GO:0061180; GO:0045762; GO:0051928; GO:0070509; GO:0051924; GO:0002115	GO:0005515; GO:0005262; GO:0005516; GO:0042802; GO:0015279	GO:0016020; GO:0016021; GO:0005886; GO:0032991; GO:0016323; GO:0045121; GO:0044853; GO:0005887; GO:0030426	ORAI1	109305	TRUE	-0.297268	0.00113778	0.0247653	chr5
ENSMUSG00000033214	ENSMUST00000042767; ENSMUST00000227891	Slitrk5	protein_coding	protein_coding	SLIT and NTRK-like family, member 5 [Source:MGI Symbol;Acc:MGI:2679448]	0.5485	2834	GO:0043588; GO:0009410; GO:0007409; GO:0048813; GO:0030534; GO:0051965; GO:0007268; GO:1905606; GO:0072359; GO:0007625; GO:0021756	GO:0005515; GO:0003674	GO:0045202; GO:0016020; GO:0016021; GO:0043235	SLITRK5	75409	TRUE	-0.249075	0.0011424	0.024829	chr14
ENSMUSG00000037972	ENSMUST00000228962; ENSMUST00000089011	Snn	protein_coding	protein_coding	stannin [Source:MGI Symbol;Acc:MGI:1276549]	0.5363	1860	GO:0008150	GO:0003674; GO:0046872	GO:0005737; GO:0016020; GO:0016021; GO:0005739; GO:0005741	SNN	20621	TRUE	-0.121589	0.00115129	0.024985	chr16
ENSMUSG00000029430	ENSMUST00000031383; ENSMUST00000134632; ENSMUST00000111343	Ran	protein_coding	protein_coding	RAN, member RAS oncogene family [Source:MGI Symbol;Acc:MGI:1333112]	0.5292	1676	GO:0006913; GO:0043393; GO:0015031; GO:0007049; GO:0051301; GO:0006606; GO:0008104; GO:0046039; GO:0006611; GO:0032092; GO:0042307; GO:0030036; GO:0031503; GO:1902570; GO:0000070; GO:0000054; GO:0000055; GO:0000056; GO:0061015	GO:0005525; GO:0003924; GO:0005515; GO:0044877; GO:0046872; GO:0016787; GO:0000166; GO:0000287; GO:0019904; GO:0019003; GO:0046982; GO:0045505; GO:0061676; GO:0070883	GO:0005634; GO:0005730; GO:0005737; GO:0000785; GO:0005654; GO:0032991; GO:0005829; GO:0042470; GO:0005635; GO:0005643; GO:0055037; GO:0001673; GO:0005814; GO:0030496; GO:0036126; GO:0002177; GO:0042565	RAN	19384	TRUE	0.118644	0.00115486	0.0250253	chr5
ENSMUSG00000032355	ENSMUST00000183636; ENSMUST00000185144; ENSMUST00000034910; ENSMUST00000184848; ENSMUST00000184415; ENSMUST00000184322; ENSMUST00000185039; ENSMUST00000183686; ENSMUST00000183955; ENSMUST00000184006; ENSMUST00000184138; ENSMUST00000184316; ENSMUST00000184106; ENSMUST00000184944; ENSMUST00000183350	Mlip	protein_coding	protein_coding	muscular LMNA-interacting protein [Source:MGI Symbol;Acc:MGI:1916892]	0.4598	1561	GO:0000122; GO:0006366; GO:0010614; GO:1903243	GO:0003714; GO:0005521	GO:0005634; GO:0016020; GO:0005886; GO:0042383; GO:0031981; GO:0005635; GO:0016605	MLIP	69642	TRUE	0.443405	0.00116688	0.0252074	chr9
ENSMUSG00000020023	ENSMUST00000147869; ENSMUST00000132743; ENSMUST00000139230; ENSMUST00000065060; ENSMUST00000148823; ENSMUST00000148910; ENSMUST00000117460; ENSMUST00000121471; ENSMUST00000117929	Tmcc3	protein_coding	protein_coding	transmembrane and coiled coil domains 3 [Source:MGI Symbol;Acc:MGI:2442900]	0.5219	1936	GO:0008150	GO:0042802; GO:0071889	GO:0016020; GO:0016021; GO:0005783; GO:0005789; GO:0012505	TMCC3	319880	TRUE	-0.145798	0.00116799	0.0252074	chr10
ENSMUSG00000040548	ENSMUST00000042780; ENSMUST00000207249; ENSMUST00000103070; ENSMUST00000128933; ENSMUST00000153870	Tex2	protein_coding	protein_coding	testis expressed gene 2 [Source:MGI Symbol;Acc:MGI:102465]	0.5144	2375	GO:0008150; GO:0006869	GO:0008289; GO:0003674	GO:0005634; GO:0016020; GO:0016021; GO:0005783; GO:0005789; GO:0031965	TEX2	21763	TRUE	-0.165252	0.00116843	0.0252074	chr11
ENSMUSG00000031910	ENSMUST00000034385; ENSMUST00000176144; ENSMUST00000175987	Has3	protein_coding	protein_coding	hyaluronan synthase 3 [Source:MGI Symbol;Acc:MGI:109599]	0.5194	3739	GO:0045893; GO:0030213; GO:0045226; GO:0085029; GO:1900106	GO:0016740; GO:0016757; GO:0042802; GO:0050501	GO:0016020; GO:0016021; GO:0000139; GO:0005794; GO:0005886; GO:0031410; GO:0005887; GO:0005634; GO:0005737; GO:0036117	HAS3	15118	TRUE	-0.546486	0.00117326	0.0252743	chr8
ENSMUSG00000039985	ENSMUST00000054080; ENSMUST00000203164; ENSMUST00000204435; ENSMUST00000081956; ENSMUST00000111562; ENSMUST00000204119; ENSMUST00000204590; ENSMUST00000132696; ENSMUST00000139355; ENSMUST00000146457; ENSMUST00000143963; ENSMUST00000127063	Sinhcaf	protein_coding	protein_coding	SIN3-HDAC complex associated factor [Source:MGI Symbol;Acc:MGI:1929091]	0.4754	1269	GO:0008284; GO:0045596; GO:0030336; GO:1902459; GO:0000122; GO:0030512; GO:1902455	GO:0005515	GO:0005634; GO:0016580	SINHCAF	56306	TRUE	-0.38491	0.00119227	0.025646	chr6
ENSMUSG00000028455	ENSMUST00000030169; ENSMUST00000125180; ENSMUST00000153203; ENSMUST00000136326; ENSMUST00000135660; ENSMUST00000123465; ENSMUST00000138030; ENSMUST00000142781; ENSMUST00000143371; ENSMUST00000127645; ENSMUST00000126026	Stoml2	protein_coding	protein_coding	stomatin (Epb7.2)-like 2 [Source:MGI Symbol;Acc:MGI:1913842]	0.5397	819	GO:0007005; GO:0051259; GO:0006874; GO:0050852; GO:0042776; GO:0090297; GO:0034982; GO:0010918; GO:0032743; GO:0035710; GO:0006851; GO:0010876; GO:1900210; GO:1990046	GO:0008289; GO:0051020; GO:1901612	GO:0005739; GO:0005737; GO:0016020; GO:0005886; GO:0001772; GO:0045121; GO:0015629; GO:0005856; GO:0005743; GO:0005758; GO:0019897; GO:0008180; GO:0042101	STOML2	66592	TRUE	0.16785	0.00120136	0.0258036	chr4
ENSMUSG00000032024	ENSMUST00000139577; ENSMUST00000034522; ENSMUST00000141759; ENSMUST00000134153	Clmp	protein_coding	protein_coding	CXADR-like membrane protein [Source:MGI Symbol;Acc:MGI:1918816]	0.5631	1503	GO:0048565	GO:0003674	GO:0016020; GO:0016021; GO:0005886; GO:0005881; GO:0070161; GO:0005923	CLMP	71566	TRUE	-0.266762	0.00121078	0.0259679	chr9
ENSMUSG00000020171	ENSMUST00000218887; ENSMUST00000020382; ENSMUST00000219609	Yeats4	protein_coding	protein_coding	YEATS domain containing 4 [Source:MGI Symbol;Acc:MGI:1927224]	0.5008	1074	GO:0006355; GO:0051726; GO:0006357; GO:0006325; GO:0006338; GO:0043967; GO:0016573; GO:0045893; GO:0043968; GO:1905168; GO:0042981; GO:2000779	GO:0005515; GO:0042393; GO:0070577; GO:0008022; GO:0140030	GO:0005634; GO:0005654; GO:0000786; GO:0031965; GO:0035267	YEATS4	64050	TRUE	0.198731	0.00121884	0.0260767	chr10
ENSMUSG00000057469	ENSMUST00000220794; ENSMUST00000220707; ENSMUST00000020908; ENSMUST00000221541; ENSMUST00000221934; ENSMUST00000222582; ENSMUST00000221600	E2f6	protein_coding	protein_coding	E2F transcription factor 6 [Source:MGI Symbol;Acc:MGI:1354159]	0.4937	1822	GO:0006355; GO:0000122; GO:0006357; GO:0007049; GO:0000083	GO:0046983; GO:0003677; GO:0043565; GO:0000978; GO:0000981; GO:0003700; GO:0000977; GO:0001227	GO:0005667; GO:0005634; GO:0005654; GO:0071339; GO:0090575; GO:0005662	E2F6	50496	TRUE	-0.173637	0.00121942	0.0260767	chr12
ENSMUSG00000027674	ENSMUST00000108225; ENSMUST00000194016; ENSMUST00000193681; ENSMUST00000192093; ENSMUST00000193289; ENSMUST00000078226; ENSMUST00000108224; ENSMUST00000108226; ENSMUST00000108221; ENSMUST00000108219; ENSMUST00000155264; ENSMUST00000194627	Pex5l	protein_coding	protein_coding	peroxisomal biogenesis factor 5-like [Source:MGI Symbol;Acc:MGI:1916672]	0.4957	2835	GO:0034220; GO:0098655; GO:0042391; GO:0043949; GO:0045055; GO:0016560; GO:0045185; GO:0051461	GO:0005515; GO:0005221; GO:0000268; GO:0031267; GO:0005052	GO:0005737; GO:0016020; GO:0043235; GO:0005829; GO:0048471; GO:0030425; GO:0017071; GO:0005778; GO:0051286	PEX5L	58869	TRUE	-0.26707	0.00123101	0.026286	chr3
ENSMUSG00000047466	ENSMUST00000074653; ENSMUST00000237203; ENSMUST00000235641	8030462N17Rik	protein_coding	protein_coding	RIKEN cDNA 8030462N17 gene [Source:MGI Symbol;Acc:MGI:2444951]	0.4542	3101				C18orf25	212163	TRUE	-0.142083	0.00123479	0.0263283	chr18
ENSMUSG00000070576	ENSMUST00000138784; ENSMUST00000094463	Mn1	protein_coding	protein_coding	meningioma 1 [Source:MGI Symbol;Acc:MGI:1261813]	0.6793	3708	GO:0006355; GO:0001957; GO:0033689; GO:0070564; GO:1902806		GO:0005634	MN1	433938	TRUE	-0.610099	0.00124394	0.0264769	chr5
ENSMUSG00000036907	ENSMUST00000037286	C1ql2	protein_coding	protein_coding	complement component 1, q subcomponent-like 2 [Source:MGI Symbol;Acc:MGI:3032521]	0.6333	1999		GO:0005515; GO:0042802	GO:0005615; GO:0032991; GO:0005576; GO:0005581	C1QL2	226359	TRUE	1.08039	0.00124537	0.0264769	chr1
ENSMUSG00000018659	ENSMUST00000153896; ENSMUST00000018803; ENSMUST00000107629	Pnpo	protein_coding	protein_coding	pyridoxine 5'-phosphate oxidase [Source:MGI Symbol;Acc:MGI:2144151]	0.5381	1749	GO:0008615; GO:0006725; GO:0042816; GO:0042823; GO:1901615	GO:0004733; GO:0010181; GO:0016638; GO:0016491; GO:0042803; GO:0030170		PNPO	103711	TRUE	0.170006	0.00125849	0.0267019	chr11
ENSMUSG00000029552	ENSMUST00000115467; ENSMUST00000200690; ENSMUST00000154266; ENSMUST00000121170; ENSMUST00000076654	Tes	protein_coding	protein_coding	testin LIM domain protein [Source:MGI Symbol;Acc:MGI:105081]	0.4892	2018	GO:0042127	GO:0008270; GO:0046872	GO:0005737; GO:0070161; GO:0005925	TES	21753	TRUE	-0.654472	0.00126122	0.0267019	chr6
ENSMUSG00000057666	ENSMUST00000192506; ENSMUST00000147954; ENSMUST00000117757; ENSMUST00000118875; ENSMUST00000073605; ENSMUST00000183272; ENSMUST00000182464; ENSMUST00000144205; ENSMUST00000182115; ENSMUST00000182052; ENSMUST00000182277; ENSMUST00000182670; ENSMUST00000144588	Gapdh	protein_coding	protein_coding	glyceraldehyde-3-phosphate dehydrogenase [Source:MGI Symbol;Acc:MGI:95640]	0.5595	945	GO:0006006; GO:0006096; GO:0017148; GO:0006915; GO:0051402; GO:0071346; GO:0002376; GO:0006417; GO:0045087; GO:0050832; GO:0050821; GO:0006094; GO:0010951; GO:0031640; GO:0061844; GO:0032481; GO:0000226; GO:0001819; GO:0043123; GO:0019933; GO:0061621; GO:1905460; GO:0005975; GO:0035606; GO:0051873; GO:0060359	GO:0051287; GO:0016620; GO:0000166; GO:0016491; GO:0004365; GO:0050661; GO:0016740; GO:0005515; GO:0042802; GO:0019828; GO:0008017; GO:0019899; GO:0097718; GO:0035605	GO:0005739; GO:0005634; GO:1990904; GO:0005829; GO:0005737; GO:0005886; GO:0015630; GO:0043231; GO:0005856; GO:0031965; GO:0098978; GO:0005811; GO:0043209; GO:0099092; GO:0031906; GO:0097452	GAPDH	14433	TRUE	0.13455	0.00126144	0.0267019	chr6
ENSMUSG00000032599	ENSMUST00000192307; ENSMUST00000193560; ENSMUST00000193634; ENSMUST00000195580; ENSMUST00000192226; ENSMUST00000194875; ENSMUST00000195514; ENSMUST00000085018; ENSMUST00000194782; ENSMUST00000192028; ENSMUST00000193055; ENSMUST00000193970	Ip6k2	protein_coding	protein_coding	inositol hexaphosphate kinase 2 [Source:MGI Symbol;Acc:MGI:1923750]	0.5321	1100	GO:0016310; GO:0032958; GO:0006629; GO:0046854; GO:0043065; GO:0030308; GO:0046488; GO:0043647; GO:0006817; GO:1905396	GO:0016740; GO:0016301; GO:0000166; GO:0005524; GO:0000828; GO:0000832; GO:0097243	GO:0005634; GO:0005654; GO:0030054; GO:0005737; GO:0001650	IP6K2	76500	TRUE	0.160185	0.00128004	0.0270566	chr9
ENSMUSG00000023915	ENSMUST00000024708; ENSMUST00000233482	Tnfrsf21	protein_coding	protein_coding	tumor necrosis factor receptor superfamily, member 21 [Source:MGI Symbol;Acc:MGI:2151075]	0.5413	2643	GO:0007165; GO:0006915; GO:0071356; GO:0002250; GO:0006959; GO:0002376; GO:0050852; GO:0007413; GO:0042130; GO:0031642; GO:0032696; GO:0030889; GO:0051402; GO:0097252; GO:0048713; GO:0042552; GO:0032693; GO:0001783; GO:0032714	GO:0005515	GO:0005737; GO:0016020; GO:0016021; GO:0005886; GO:0110165; GO:0005887; GO:0030424; GO:0031226	TNFRSF21	94185	TRUE	-0.181447	0.0012834	0.0270884	chr17
ENSMUSG00000031465	ENSMUST00000033846; ENSMUST00000170200	Angpt2	protein_coding	protein_coding	angiopoietin 2 [Source:MGI Symbol;Acc:MGI:1202890]	0.4913	2106	GO:0010467; GO:0045766; GO:0016525; GO:0001525; GO:0030154; GO:2000272; GO:0007169; GO:0007492; GO:0048514; GO:0048014; GO:0001666; GO:0007281; GO:0009314; GO:0009612; GO:0009749; GO:0014070; GO:0014823; GO:0031100; GO:0043537; GO:0050928; GO:0060135; GO:0071363; GO:0072012; GO:0010812; GO:0001974; GO:0030097; GO:0045765	GO:0005515; GO:0046872; GO:0005102; GO:0030971; GO:0005172; GO:0048019	GO:0005634; GO:0005886; GO:0005615; GO:0005576; GO:0062023; GO:0042995	ANGPT2	11601	TRUE	0.590659	0.0012912	0.0272138	chr8
ENSMUSG00000005575	ENSMUST00000165394; ENSMUST00000138357; ENSMUST00000005714; ENSMUST00000131837; ENSMUST00000125964; ENSMUST00000123541; ENSMUST00000156389; ENSMUST00000126827	Ube2m	protein_coding	protein_coding	ubiquitin-conjugating enzyme E2M [Source:MGI Symbol;Acc:MGI:108278]	0.5661	881	GO:0016567; GO:0043525; GO:0045116; GO:0036211	GO:0016740; GO:0000166; GO:0005524; GO:0004842; GO:0019788; GO:0061654	GO:0005634	UBE2M	22192	TRUE	0.130048	0.00130193	0.0274006	chr7
ENSMUSG00000004633	ENSMUST00000138930; ENSMUST00000046856; ENSMUST00000133315; ENSMUST00000114403; ENSMUST00000127323; ENSMUST00000204410; ENSMUST00000146114; ENSMUST00000114402; ENSMUST00000114401; ENSMUST00000067741; ENSMUST00000204921; ENSMUST00000203091; ENSMUST00000204115; ENSMUST00000203941; ENSMUST00000204746	Chn2	protein_coding	protein_coding	chimerin 2 [Source:MGI Symbol;Acc:MGI:1917243]	0.5178	1081	GO:0007165; GO:0043547; GO:0051056; GO:0043087	GO:0046872; GO:0005096	GO:0045202; GO:0016020	CHN2	69993	TRUE	0.187095	0.00130521	0.02743	chr6
ENSMUSG00000059852	ENSMUST00000077962; ENSMUST00000184574; ENSMUST00000184366	Kcng2	protein_coding	protein_coding	potassium voltage-gated channel, subfamily G, member 2 [Source:MGI Symbol;Acc:MGI:3694646]	0.7163	1236	GO:0055085; GO:0006811; GO:0051260; GO:0006813; GO:0034765; GO:0071805	GO:0005216; GO:0005244; GO:0005249; GO:0005267	GO:0016020; GO:0016021; GO:0008076	KCNG2	240444	TRUE	-0.908945	0.00131193	0.0275316	chr18
ENSMUSG00000069089	ENSMUST00000091299; ENSMUST00000225990; ENSMUST00000225946; ENSMUST00000225056; ENSMUST00000225578	Cdk7	protein_coding	protein_coding	cyclin-dependent kinase 7 [Source:MGI Symbol;Acc:MGI:102956]	0.4427	1237	GO:0006468; GO:0006366; GO:0016310; GO:0006281; GO:0006974; GO:0007049; GO:0051301; GO:0045944; GO:0050821; GO:0006367; GO:2000045; GO:0070816; GO:0000079; GO:0051726	GO:0005524; GO:0004672; GO:0005515; GO:0044877; GO:0016740; GO:0000166; GO:0016301; GO:0004674; GO:0106310; GO:0008094; GO:0004693; GO:0008353; GO:0008022	GO:0005634; GO:0005829; GO:0005654; GO:0005737; GO:0005886; GO:0016020; GO:0005675; GO:0048471; GO:0001673; GO:0001650; GO:0070985; GO:0005856; GO:0000439; GO:0070516; GO:0019907	CDK7	12572	TRUE	-0.211983	0.00131485	0.0275534	chr13
ENSMUSG00000052033	ENSMUST00000075087; ENSMUST00000063682; ENSMUST00000136839; ENSMUST00000109148; ENSMUST00000170167; ENSMUST00000109147; ENSMUST00000139328	Pfdn4	protein_coding	protein_coding	prefoldin 4 [Source:MGI Symbol;Acc:MGI:1923512]	0.4262	727	GO:0006457; GO:1905907	GO:0051082; GO:0001540	GO:0016272; GO:0005739; GO:0005634; GO:0005737	PFDN4	109054	TRUE	0.260081	0.00131981	0.0276178	chr2
ENSMUSG00000038267	ENSMUST00000148390; ENSMUST00000040336; ENSMUST00000128392; ENSMUST00000145038; ENSMUST00000143353	Slc22a23	protein_coding	protein_coding	solute carrier family 22, member 23 [Source:MGI Symbol;Acc:MGI:1920352]	0.5496	2749	GO:0055085; GO:0006811	GO:0022857	GO:0016021; GO:0016020	SLC22A23	73102	TRUE	-0.183352	0.00132814	0.0277524	chr13
ENSMUSG00000029192	ENSMUST00000146430; ENSMUST00000136189; ENSMUST00000031094; ENSMUST00000171385; ENSMUST00000126077; ENSMUST00000140607; ENSMUST00000173757; ENSMUST00000124036; ENSMUST00000130417; ENSMUST00000139117; ENSMUST00000173532; ENSMUST00000150813; ENSMUST00000149157; ENSMUST00000141017; ENSMUST00000141626; ENSMUST00000156658; ENSMUST00000146252; ENSMUST00000140179; ENSMUST00000150733; ENSMUST00000139182;…	Tbc1d14	protein_coding	protein_coding	TBC1 domain family, member 14 [Source:MGI Symbol;Acc:MGI:1098708]	0.5112	1972	GO:0010507; GO:0071955; GO:2000785	GO:0019901	GO:0005829; GO:0005654; GO:0005776; GO:0005794; GO:0043231; GO:0055037	TBC1D14	100855	TRUE	-0.120506	0.0013361	0.0278179	chr5
ENSMUSG00000020048	ENSMUST00000129178; ENSMUST00000020238; ENSMUST00000129413; ENSMUST00000134515; ENSMUST00000146897	Hsp90b1	protein_coding	protein_coding	heat shock protein 90, beta (Grp94), member 1 [Source:MGI Symbol;Acc:MGI:98817]	0.4275	1618	GO:0006457; GO:0030433; GO:0071318; GO:0001666; GO:0030970; GO:0031247; GO:0043066; GO:0043666	GO:0005524; GO:0051082; GO:0016887; GO:0140662; GO:0005515; GO:0003723; GO:0000166; GO:0019903; GO:0050750	GO:0005829; GO:0005783; GO:0032991; GO:0048471; GO:0016529; GO:0042470; GO:0005788; GO:0005789; GO:0030496; GO:0005576; GO:0005790; GO:0033018; GO:0097524; GO:0034663	HSP90B1,HSP90B2P	22027	TRUE	-0.141194	0.0013369	0.0278179	chr10
ENSMUSG00000045045	ENSMUST00000113822; ENSMUST00000053597	Lrfn4	protein_coding	protein_coding	leucine rich repeat and fibronectin type III domain containing 4 [Source:MGI Symbol;Acc:MGI:2385612]	0.6554	3056	GO:0099151; GO:0099560; GO:1905606	GO:0005515	GO:0016020; GO:0016021; GO:0009986; GO:0098978; GO:0098982; GO:0099061	LRFN4	225875	TRUE	0.193961	0.00133778	0.0278179	chr19
ENSMUSG00000073514	ENSMUST00000097495; ENSMUST00000160328	Dok6	protein_coding	protein_coding	docking protein 6 [Source:MGI Symbol;Acc:MGI:3639495]	0.3795	7090	GO:0007169; GO:0043410	GO:0005515	GO:0005737	DOK6	623279	TRUE	-0.254232	0.00134042	0.0278179	chr18
ENSMUSG00000051065	ENSMUST00000100023; ENSMUST00000232571	Mb21d2	protein_coding	protein_coding	Mab-21 domain containing 2 [Source:MGI Symbol;Acc:MGI:1917028]	0.517	2266		GO:0044877		MB21D2	239796	TRUE	-0.285626	0.00134237	0.0278179	chr16
ENSMUSG00000038375	ENSMUST00000151466; ENSMUST00000043237; ENSMUST00000174685; ENSMUST00000173406; ENSMUST00000134218	Trp53inp2	protein_coding	protein_coding	transformation related protein 53 inducible nuclear protein 2 [Source:MGI Symbol;Acc:MGI:1915978]	0.5808	1404	GO:0045893; GO:0010508; GO:0001649; GO:0001894; GO:0006914; GO:0008104; GO:0000045; GO:0016236; GO:0006511; GO:1903828	GO:0043130	GO:0005634; GO:0005737; GO:0005776; GO:0005829; GO:0016605; GO:0031410	TP53INP2	68728	TRUE	-0.195299	0.00134269	0.0278179	chr2
ENSMUSG00000015002	ENSMUST00000174135; ENSMUST00000015146; ENSMUST00000096411; ENSMUST00000173858; ENSMUST00000174601; ENSMUST00000172756; ENSMUST00000174856; ENSMUST00000174591; ENSMUST00000173008; ENSMUST00000211878; ENSMUST00000227340; ENSMUST00000174615; ENSMUST00000173936; ENSMUST00000174749	Efr3a	protein_coding	protein_coding	EFR3 homolog A [Source:MGI Symbol;Acc:MGI:1923990]	0.4638	1580	GO:0098609; GO:0072659	GO:0042803	GO:0005829; GO:0005737; GO:0016020; GO:0005886; GO:0001533	EFR3A	76740	TRUE	-0.238335	0.00134609	0.0278179	chr15
ENSMUSG00000062526	ENSMUST00000073054; ENSMUST00000236244; ENSMUST00000237279; ENSMUST00000237631	Mppe1	protein_coding	protein_coding	metallophosphoesterase 1 [Source:MGI Symbol;Acc:MGI:2661311]	0.5344	1848	GO:0006506; GO:0006888; GO:0016192	GO:0016787; GO:0003674; GO:0046872; GO:0008081; GO:0030145; GO:0034235; GO:0062050	GO:0005654; GO:0016020; GO:0016021; GO:0005794; GO:0033116; GO:0005793; GO:0070971; GO:0005801	MPPE1	225651	TRUE	-0.22845	0.00134649	0.0278179	chr18
ENSMUSG00000041530	ENSMUST00000239428; ENSMUST00000097888; ENSMUST00000239399; ENSMUST00000127800; ENSMUST00000176315; ENSMUST00000156533; ENSMUST00000149425	Ago1	protein_coding	protein_coding	argonaute RISC catalytic subunit 1 [Source:MGI Symbol;Acc:MGI:2446630]	0.4983	4008	GO:0035278; GO:0010628; GO:0045944; GO:0016525; GO:0031047; GO:0006417; GO:0000956; GO:0035196; GO:0010586; GO:0031054; GO:1901224; GO:0010501; GO:0070922	GO:0005515; GO:0003676; GO:0003723; GO:0000978; GO:0001046; GO:0035198; GO:0003725; GO:0003727; GO:0000976; GO:0000993	GO:0016442; GO:0005634; GO:1990904; GO:0070578; GO:0005829; GO:0005737; GO:0000932; GO:0043232; GO:0005844; GO:0036464	AGO1	236511	TRUE	-0.2021	0.00135173	0.0278798	chr4
ENSMUSG00000043144	ENSMUST00000230075; ENSMUST00000023754	Aqp6	protein_coding	protein_coding	aquaporin 6 [Source:MGI Symbol;Acc:MGI:1341204]	0.5623	1744	GO:0055085; GO:0006833; GO:0015670; GO:0003097; GO:0015706; GO:0042476	GO:0015267; GO:0015250; GO:0015112	GO:0016020; GO:0016021; GO:0005886; GO:0031410; GO:0030659; GO:0016324; GO:0005887	AQP6	11831	TRUE	1.08085	0.00135503	0.0278798	chr15
ENSMUSG00000026812	ENSMUST00000156857; ENSMUST00000028155; ENSMUST00000133565; ENSMUST00000113869; ENSMUST00000113867; ENSMUST00000153625; ENSMUST00000124507; ENSMUST00000113870; ENSMUST00000150274; ENSMUST00000125715; ENSMUST00000139642	Tsc1	protein_coding	protein_coding	TSC complex subunit 1 [Source:MGI Symbol;Acc:MGI:1929183]	0.5027	4163	GO:0042552; GO:0017148; GO:0090650; GO:0032868; GO:0008344; GO:0008285; GO:0006417; GO:0008283; GO:0010977; GO:0045859; GO:0050808; GO:0006813; GO:0032007; GO:0001822; GO:0007399; GO:0050821; GO:0032780; GO:0090630; GO:0007160; GO:1903204; GO:0001843; GO:0030030; GO:0051726; GO:0051496; GO:0055007; GO:0021766; GO:0021987; GO:0016242; GO:0034260; GO:0051893; GO:0001952; GO:0051492; GO:0002250; GO:…	GO:0044877; GO:0005515; GO:0047485; GO:0051087; GO:0032794; GO:0042030; GO:0030544; GO:0051879	GO:0005634; GO:0005829; GO:0005737; GO:0016020; GO:0032991; GO:0048471; GO:0043231; GO:0030027; GO:0030426; GO:0014069; GO:0005811; GO:0005856; GO:0005938; GO:0042995; GO:0005884; GO:0101031; GO:0033596	TSC1	64930	TRUE	-0.140422	0.0013552	0.0278798	chr2
ENSMUSG00000061603	ENSMUST00000095737; ENSMUST00000219786	Akap6	protein_coding	protein_coding	A kinase (PRKA) anchor protein 6 [Source:MGI Symbol;Acc:MGI:3050566]	0.4636	9706	GO:0030307; GO:0071320; GO:0045727; GO:0071345; GO:0001934; GO:0070886; GO:0061051; GO:0007194; GO:0010738; GO:0051281; GO:0031503; GO:0060306; GO:0060316; GO:0071872; GO:0086004; GO:1901381; GO:1901897; GO:1902261; GO:2000481	GO:0005515; GO:0044325; GO:0043495; GO:0051018; GO:0019899; GO:0034237; GO:0051721; GO:0060090; GO:0008179	GO:0005634; GO:0005737; GO:0032991; GO:0048471; GO:0042383; GO:0031965; GO:0016529; GO:0005635; GO:0034704; GO:0005901; GO:0014704; GO:0030315; GO:0014701	AKAP6	238161	TRUE	-0.174126	0.00136165	0.0279732	chr12
ENSMUSG00000049538	ENSMUST00000080145; ENSMUST00000123552; ENSMUST00000109694; ENSMUST00000130726	Adamts16	protein_coding	protein_coding	a disintegrin-like and metallopeptidase (reprolysin type) with thrombospondin type 1 motif, 16 [Source:MGI Symbol;Acc:MGI:2429637]	0.5091	3856	GO:0006508; GO:0030198; GO:1902017; GO:0001658; GO:0003073; GO:0048232	GO:0004222; GO:0046872; GO:0016787; GO:0008233; GO:0008237	GO:0005576; GO:0031012	ADAMTS16	271127	TRUE	0.577954	0.00136509	0.0280045	chr13
ENSMUSG00000035498	ENSMUST00000148158; ENSMUST00000039229; ENSMUST00000140915	Cdcp1	protein_coding	protein_coding	CUB domain containing protein 1 [Source:MGI Symbol;Acc:MGI:2442010]	0.4991	3885	GO:0008150	GO:0003674	GO:0005575; GO:0016020; GO:0016021; GO:0005886	CDCP1	109332	TRUE	1.05176	0.00138211	0.0282914	chr9
ENSMUSG00000048142	ENSMUST00000056355; ENSMUST00000201041	Nat8l	protein_coding	protein_coding	N-acetyltransferase 8-like [Source:MGI Symbol;Acc:MGI:2447776]	0.6102	3367		GO:0016407; GO:0017188	GO:0016020; GO:0016021; GO:0005737; GO:0005739; GO:0031966; GO:0043231	NAT8L	269642	TRUE	-0.176817	0.00138295	0.0282914	chr5
ENSMUSG00000030663	ENSMUST00000205427; ENSMUST00000205450; ENSMUST00000032899; ENSMUST00000106608; ENSMUST00000106607; ENSMUST00000151254	1110004F10Rik	protein_coding	protein_coding	RIKEN cDNA 1110004F10 gene [Source:MGI Symbol;Acc:MGI:1929274]	0.4604	1104	GO:0008150	GO:0003674	GO:0005575	C11orf58	56372	TRUE	0.14094	0.00140655	0.028734	chr7
ENSMUSG00000022995	ENSMUST00000193703; ENSMUST00000111024; ENSMUST00000177811; ENSMUST00000111025; ENSMUST00000195703; ENSMUST00000191649; ENSMUST00000193074; ENSMUST00000078719; ENSMUST00000195059; ENSMUST00000111030; ENSMUST00000195788; ENSMUST00000192768; ENSMUST00000192967; ENSMUST00000195840; ENSMUST00000195461; ENSMUST00000192497	Enah	protein_coding	protein_coding	ENAH actin regulator [Source:MGI Symbol;Acc:MGI:108360]	0.4981	2830	GO:1990830; GO:0007399; GO:0030154; GO:0007015; GO:0001843; GO:0007411; GO:0030036; GO:0008154; GO:0070358	GO:0005515; GO:0003779; GO:0017124; GO:0050699; GO:0005522	GO:0005829; GO:0005737; GO:0005886; GO:0045202; GO:0070161; GO:0005925; GO:0005856; GO:0042995; GO:0030027; GO:0030175; GO:0030054; GO:0043005; GO:0015629; GO:0001725	ENAH	13800	TRUE	-0.177363	0.00141031	0.0287467	chr1
ENSMUSG00000050272	ENSMUST00000056102; ENSMUST00000232829	Dscam	protein_coding	protein_coding	DS cell adhesion molecule [Source:MGI Symbol;Acc:MGI:1196281]	0.5177	5238	GO:0007626; GO:0007399; GO:0007155; GO:0007411; GO:0007416; GO:0048813; GO:0007156; GO:0070593; GO:0038007; GO:0042327; GO:0007162; GO:0048842; GO:0010842; GO:0060219; GO:0060060	GO:0005515; GO:0098632; GO:1990782; GO:1990890	GO:0016020; GO:0016021; GO:0005886; GO:0005887; GO:0030424; GO:0045202; GO:0030426; GO:0042995; GO:0030425; GO:0043025	DSCAM	13508	TRUE	-0.225497	0.00141154	0.0287467	chr16
ENSMUSG00000029716	ENSMUST00000198866; ENSMUST00000031729; ENSMUST00000200190; ENSMUST00000199054; ENSMUST00000196471; ENSMUST00000198783; ENSMUST00000199957; ENSMUST00000197705; ENSMUST00000196375; ENSMUST00000196450; ENSMUST00000199069	Tfr2	protein_coding	protein_coding	transferrin receptor 2 [Source:MGI Symbol;Acc:MGI:1354956]	0.5819	1669	GO:0045944; GO:0006879; GO:0006898; GO:0045807; GO:0090277; GO:0010039; GO:0055072; GO:0071281; GO:0033572; GO:0006953; GO:0140298; GO:1903319	GO:0005515; GO:0039706; GO:0004998	GO:0005737; GO:0016020; GO:0016021; GO:0009897; GO:0005886; GO:0005887; GO:0031410; GO:1990712	TFR2	50765	TRUE	0.536483	0.00141306	0.0287467	chr5
ENSMUSG00000063873	ENSMUST00000110007; ENSMUST00000153249; ENSMUST00000137908; ENSMUST00000081121; ENSMUST00000131123	Slc24a3	protein_coding	protein_coding	solute carrier family 24 (sodium/potassium/calcium exchanger), member 3 [Source:MGI Symbol;Acc:MGI:2137513]	0.5544	2159	GO:0055085; GO:0006811; GO:0006813; GO:0006816; GO:0006814; GO:0006812; GO:0006874; GO:0035725; GO:0071805; GO:0070588; GO:0010628; GO:0010629; GO:0030282	GO:0015293; GO:0008273; GO:0015085; GO:0015297; GO:0005262	GO:0016021; GO:0016020; GO:0005886; GO:0071944; GO:0005887	SLC24A3	94249	TRUE	0.187229	0.00141745	0.028796	chr2
ENSMUSG00000021670	ENSMUST00000022176; ENSMUST00000168855; ENSMUST00000169945; ENSMUST00000170287; ENSMUST00000169202; ENSMUST00000163201; ENSMUST00000169196; ENSMUST00000172440; ENSMUST00000169966; ENSMUST00000171537; ENSMUST00000168374	Hmgcr	protein_coding	protein_coding	3-hydroxy-3-methylglutaryl-Coenzyme A reductase [Source:MGI Symbol;Acc:MGI:96159]	0.4797	1393	GO:0015936; GO:0043066; GO:0048643; GO:0008284; GO:0006629; GO:0008202; GO:0008203; GO:0006694; GO:0006695; GO:0016126; GO:0008299; GO:0070374; GO:0061045; GO:0008542; GO:0010666; GO:0032874; GO:0045907; GO:0048661; GO:0061179; GO:0043407; GO:1900222; GO:0006743; GO:0010664; GO:0042177; GO:0050709; GO:0032933	GO:0004420; GO:0016491; GO:0016616; GO:0050661; GO:0042802; GO:0070402; GO:0051721; GO:0120225; GO:0032934	GO:0016020; GO:0016021; GO:0005783; GO:0005789; GO:0043231; GO:0005777; GO:0005778; GO:0000139	HMGCR	15357	TRUE	0.172715	0.00141993	0.0288063	chr13
ENSMUSG00000046152	ENSMUST00000066173; ENSMUST00000161788; ENSMUST00000110527; ENSMUST00000161502; ENSMUST00000162162	Fut10	protein_coding	protein_coding	fucosyltransferase 10 [Source:MGI Symbol;Acc:MGI:2384748]	0.4953	2554	GO:0006486; GO:0021799; GO:0036065; GO:0097150; GO:0036071; GO:0036445	GO:0008417; GO:0016740; GO:0016757; GO:0046920	GO:0016020; GO:0005654; GO:0016021; GO:0000139; GO:0005794; GO:0005783; GO:0005789	FUT10	171167	TRUE	-0.294413	0.00143391	0.0289757	chr8
ENSMUSG00000015337	ENSMUST00000015481	Endog	protein_coding	protein_coding	endonuclease G [Source:MGI Symbol;Acc:MGI:1261433]	0.6435	1063	GO:0001701; GO:0090502; GO:0090305; GO:0010508; GO:0043065; GO:2001022; GO:0034612; GO:0046677; GO:0006308; GO:0006309; GO:0007568; GO:0009612; GO:0032007; GO:0032043; GO:0032355; GO:0034599; GO:0036475; GO:0071277; GO:0071333; GO:0071456; GO:0090297; GO:1901300; GO:1902512	GO:0016787; GO:0046872; GO:0003676; GO:0004518; GO:0005515; GO:0000287; GO:0004519; GO:0004520; GO:0042803; GO:0004521; GO:0000014; GO:0004536	GO:0005739; GO:0005634; GO:0005829; GO:0043204; GO:0005743	ENDOG	13804	TRUE	0.283554	0.00143593	0.0289757	chr2
ENSMUSG00000052026	ENSMUST00000025520; ENSMUST00000236893	Slc6a7	protein_coding	protein_coding	solute carrier family 6 (neurotransmitter transporter, L-proline), member 7 [Source:MGI Symbol;Acc:MGI:2147363]	0.6138	1919	GO:0006865; GO:0006836; GO:0035725; GO:0015824; GO:0035524	GO:0015293; GO:0015193; GO:0005298	GO:0016021; GO:0016020; GO:0005886; GO:0005887; GO:0045202; GO:0098978; GO:0097060; GO:0099056; GO:0030285; GO:0098685	SLC6A7	240332	TRUE	0.153375	0.00143709	0.0289757	chr18
ENSMUSG00000030652	ENSMUST00000098090; ENSMUST00000207046; ENSMUST00000032887; ENSMUST00000209146; ENSMUST00000127700	Coq7	protein_coding	protein_coding	demethyl-Q 7 [Source:MGI Symbol;Acc:MGI:107207]	0.5126	1746	GO:0006744; GO:0001701; GO:0045944; GO:0042775; GO:0000122; GO:0022008; GO:0022904; GO:0010468; GO:0008340; GO:0034599; GO:0001841; GO:0006979; GO:2000377; GO:0070584	GO:0004497; GO:0046872; GO:0016491; GO:0008682; GO:0016709; GO:0003682	GO:0016020; GO:0005739; GO:0005743; GO:0031314; GO:0005634; GO:0110142	COQ7	12850	TRUE	0.228942	0.00143735	0.0289757	chr7
ENSMUSG00000041939	ENSMUST00000137167; ENSMUST00000112239; ENSMUST00000125120; ENSMUST00000124260; ENSMUST00000125650; ENSMUST00000043760; ENSMUST00000139420	Mvk	protein_coding	protein_coding	mevalonate kinase [Source:MGI Symbol;Acc:MGI:107624]	0.5882	1295	GO:0016310; GO:0006629; GO:0008299; GO:0019287; GO:0008202; GO:0008203; GO:0006694; GO:0006695; GO:0016126; GO:0050728; GO:0017148	GO:0005524; GO:0016740; GO:0000166; GO:0016301; GO:0004496; GO:0016773; GO:0042802; GO:0003729; GO:0046872; GO:0000287; GO:1990825	GO:0005737; GO:0005829; GO:0043231; GO:0005777	MVK	17855	TRUE	0.258265	0.00143819	0.0289757	chr5
ENSMUSG00000005225	ENSMUST00000119706; ENSMUST00000101385	Plekha8	protein_coding	protein_coding	pleckstrin homology domain containing, family A (phosphoinositide binding specific) member 8 [Source:MGI Symbol;Acc:MGI:2681164]	0.4666	4288	GO:0120009; GO:0006869; GO:1902389; GO:0035627; GO:0035621; GO:0046836	GO:0120013; GO:0008289; GO:0070273; GO:0051861; GO:0097001; GO:0017089; GO:1902387; GO:1902388	GO:0005737; GO:0005654; GO:0016020; GO:0005794; GO:0005829; GO:0005802	PLEKHA8,PLEKHA8P1	231999	TRUE	-0.261994	0.00144196	0.0290118	chr6
ENSMUSG00000005687	ENSMUST00000005830; ENSMUST00000136937; ENSMUST00000139489; ENSMUST00000155520; ENSMUST00000135017; ENSMUST00000147042	Bcas2	protein_coding	protein_coding	BCAS2 pre-mRNA processing factor [Source:MGI Symbol;Acc:MGI:1915433]	0.4658	1790	GO:0006397; GO:0008380; GO:0000398	GO:0003674	GO:0005634; GO:0016607; GO:0005681; GO:0005730; GO:0000974; GO:0071013; GO:0005813; GO:0071007; GO:0005662	BCAS2	68183	TRUE	0.140066	0.00145191	0.0291717	chr3
ENSMUSG00000056043	ENSMUST00000069912	Rgs9bp	protein_coding	protein_coding	regulator of G-protein signalling 9 binding protein [Source:MGI Symbol;Acc:MGI:2384418]	0.4866	6590	GO:0009968; GO:0007186; GO:0050896; GO:0007601; GO:0050908		GO:0016020; GO:0016021; GO:0043005; GO:0001750	RGS9BP	243923	TRUE	0.556729	0.00145774	0.0292489	chr7
ENSMUSG00000022228	ENSMUST00000032820; ENSMUST00000110485	Zscan26	protein_coding	protein_coding	zinc finger and SCAN domain containing 26 [Source:MGI Symbol;Acc:MGI:3531417]	0.4339	4142	GO:0006357	GO:0046872; GO:0000978; GO:0000981	GO:0005829; GO:0005654; GO:0005634	ZSCAN26	432731	TRUE	-0.197153	0.00146268	0.0293077	chr13
[truncated: 13,897 more rows]
