# Supplementary material for: Structural Magnetic Resonance Imaging and Genome-Wide Transcriptional Profiling Reveal Intergenerational Vulnerability in a Mouse Model of Preconceptional Stress
Source: Research Square preprint supplement (doi:10.21203/rs.3.rs-7535749/v1), 2025-10-01
Supplement: Supplementary file 3 [file 682e9a0d06b09e7e7e24f2af.xlsx]

## Sheet: Sheet1
gene_id	transcript_id	gene_name	type	biotypes	description	gc	featWidth	GO BP	GO MF	GO CC	hgnc_symbol	entrez_id	isPresent	log2 Ratio	pValue	fdr	seqnames
ENSMUSG00000030035	ENSMUST00000032111; ENSMUST00000113936; ENSMUST00000131939; ENSMUST00000146328; ENSMUST00000151393; ENSMUST00000131936; ENSMUST00000142493; ENSMUST00000123394; ENSMUST00000205023	Wbp1	protein_coding	protein_coding	WW domain binding protein 1 [Source:MGI Symbol;Acc:MGI:104710]	0.5747	961	GO:0008150	GO:0005515; GO:0050699	GO:0005575; GO:0016020; GO:0016021	WBP1	22377	TRUE	0.340074	1.29371e-08	0.000159331	chr6
ENSMUSG00000061601	ENSMUST00000182407; ENSMUST00000030691; ENSMUST00000182426; ENSMUST00000182915	Pclo	protein_coding	protein_coding	piccolo (presynaptic cytomatrix protein) [Source:MGI Symbol;Acc:MGI:1349390]	0.4642	15180	GO:0030073; GO:0050808; GO:0098815; GO:0007010; GO:1904071; GO:0017157; GO:0007416; GO:0035418; GO:0099526; GO:1904666; GO:0097091; GO:1903423; GO:0016080; GO:0051036; GO:0048790	GO:0005515; GO:0046872; GO:0005509; GO:0005544; GO:0001222; GO:0005522; GO:0098882	GO:0045202; GO:0014069; GO:0030424; GO:0048471; GO:0042995; GO:0048786; GO:0043005; GO:0030426; GO:0043025; GO:0030133; GO:0043226; GO:0030425; GO:0098978; GO:0031594; GO:0043195; GO:0005802; GO:0098688; GO:0098982; GO:0005798; GO:0044316; GO:0060077; GO:0098831; GO:0097470; GO:0048788; GO:0044317; GO:0110165	PCLO	26875	TRUE	-0.353151	2.18831e-08	0.000159331	chr5
ENSMUSG00000038143	ENSMUST00000079195; ENSMUST00000211882; ENSMUST00000110367; ENSMUST00000211737; ENSMUST00000210030; ENSMUST00000209337; ENSMUST00000210153; ENSMUST00000209941; ENSMUST00000181417	Stox2	protein_coding	protein_coding	storkhead box 2 [Source:MGI Symbol;Acc:MGI:1918319]	0.494	4575	GO:0009617; GO:0006357; GO:0045944; GO:0009792; GO:0001893	GO:0000977; GO:0001228; GO:0003674	GO:0005634; GO:0005737; GO:0005575	STOX2	71069	TRUE	-0.195864	3.9178e-08	0.00018456	chr8
ENSMUSG00000015165	ENSMUST00000174548; ENSMUST00000173750; ENSMUST00000172529; ENSMUST00000172884; ENSMUST00000038572; ENSMUST00000174477; ENSMUST00000174755; ENSMUST00000174882; ENSMUST00000174396; ENSMUST00000173818; ENSMUST00000172841; ENSMUST00000173578; ENSMUST00000174526	Hnrnpl	protein_coding	protein_coding	heterogeneous nuclear ribonucleoprotein L [Source:MGI Symbol;Acc:MGI:104816]	0.5129	1510	GO:0006397; GO:0045892; GO:0000381; GO:0043484; GO:0007623; GO:0034198; GO:0045727; GO:0048025; GO:1901652; GO:1902416	GO:0003723; GO:0003730; GO:0005515; GO:0000976; GO:0003676; GO:0003729; GO:0097157; GO:1990715	GO:0005634; GO:1990904; GO:0005829; GO:0005737; GO:0000785; GO:0005654; GO:0048471; GO:0035770; GO:0045120	HNRNPL	15388	TRUE	0.152766	5.06964e-08	0.00018456	chr7
ENSMUSG00000059742	ENSMUST00000075052; ENSMUST00000112454; ENSMUST00000112452; ENSMUST00000131799	Kcnh7	protein_coding	protein_coding	potassium voltage-gated channel, subfamily H (eag-related), member 7 [Source:MGI Symbol;Acc:MGI:2159566]	0.4107	5080	GO:0055085; GO:0006811; GO:0006813; GO:0034765; GO:0071805; GO:0042391; GO:0086011; GO:0007623; GO:0034220	GO:0005216; GO:0044877; GO:0005244; GO:0005249; GO:0005267; GO:0005242	GO:0016020; GO:0016021; GO:0005887	KCNH7	170738	TRUE	-0.440795	1.19109e-07	0.000346893	chr2
ENSMUSG00000070565	ENSMUST00000078308; ENSMUST00000132699; ENSMUST00000129880; ENSMUST00000134543; ENSMUST00000128538; ENSMUST00000143358; ENSMUST00000143080	Rasal2	protein_coding	protein_coding	RAS protein activator like 2 [Source:MGI Symbol;Acc:MGI:2443881]	0.4829	2945	GO:0043087; GO:0010467; GO:0035264; GO:0060612; GO:0007165; GO:0002021; GO:0009749; GO:2000257	GO:0005096		RASAL2	226525	TRUE	-0.294735	3.06419e-07	0.000573594	chr1
ENSMUSG00000035236	ENSMUST00000038874; ENSMUST00000204404; ENSMUST00000204093; ENSMUST00000204500; ENSMUST00000147433; ENSMUST00000203872; ENSMUST00000157038; ENSMUST00000131225; ENSMUST00000203399; ENSMUST00000142872	Scai	protein_coding	protein_coding	suppressor of cancer cell invasion [Source:MGI Symbol;Acc:MGI:2443716]	0.4459	2196	GO:0006351; GO:0009968; GO:0045892; GO:0030336; GO:0035024	GO:0003714; GO:0005515	GO:0005654; GO:0005634; GO:0005737; GO:0016020; GO:0016021; GO:0031965	SCAI	320271	TRUE	-0.462136	3.13855e-07	0.000573594	chr2
ENSMUSG00000031229	ENSMUST00000113573; ENSMUST00000143361; ENSMUST00000138765; ENSMUST00000127221; ENSMUST00000141609; ENSMUST00000198567; ENSMUST00000155445; ENSMUST00000142235; ENSMUST00000196998; ENSMUST00000146193; ENSMUST00000123174; ENSMUST00000198209; ENSMUST00000197302; ENSMUST00000200471; ENSMUST00000128968; ENSMUST00000198448; ENSMUST00000134507; ENSMUST00000150914; ENSMUST00000134381; ENSMUST00000154866;…	Atrx	protein_coding	protein_coding	ATRX, chromatin remodeler [Source:MGI Symbol;Acc:MGI:103067]	0.4188	1700	GO:0045944; GO:0007283; GO:0035264; GO:0006366; GO:0006325; GO:0006281; GO:0006974; GO:0051276; GO:0006338; GO:0006334; GO:0072711; GO:0030900; GO:0072520; GO:0031297; GO:0030330; GO:0060009; GO:0000212; GO:0070192; GO:0010571; GO:0032206; GO:0035128; GO:0070198; GO:1900112; GO:1901581; GO:1901582; GO:1904908	GO:0005524; GO:0140658; GO:0005515; GO:0003682; GO:0042393; GO:0003677; GO:0046872; GO:0016787; GO:0000166; GO:0035064; GO:0004386; GO:0016887; GO:0031490; GO:0070087; GO:0015616	GO:0005634; GO:0005737; GO:0016604; GO:0005654; GO:0000781; GO:0005694; GO:0043231; GO:0000779; GO:0016605; GO:0000228; GO:0000792; GO:0005721; GO:0099115	ATRX	22589	TRUE	-0.391564	3.15119e-07	0.000573594	chrX
ENSMUSG00000067336	ENSMUST00000087435; ENSMUST00000190659; ENSMUST00000186246	Bmpr2	protein_coding	protein_coding	bone morphogenetic protein receptor, type II (serine/threonine kinase) [Source:MGI Symbol;Acc:MGI:1095407]	0.3959	6117	GO:0006468; GO:0045944; GO:0030509; GO:0060173; GO:0045669; GO:0001649; GO:0042127; GO:0050790; GO:0016310; GO:0010033; GO:0009952; GO:0071902; GO:0007178; GO:0030308; GO:0003085; GO:0030166; GO:0060350; GO:0061036; GO:0010634; GO:0030513; GO:0071773; GO:0001938; GO:0048662; GO:0010595; GO:0010862; GO:0030501; GO:0003148; GO:0003183; GO:0060412; GO:2000279; GO:0001935; GO:0060413; GO:0001568; GO:…	GO:0005524; GO:0004675; GO:0004672; GO:0005515; GO:0016740; GO:0046872; GO:0000166; GO:0016301; GO:0004674; GO:0043539; GO:1990782; GO:0036122; GO:0045296; GO:0005024; GO:0019838; GO:0019211; GO:0030546; GO:0098821	GO:0016020; GO:0014069; GO:0005737; GO:0030424; GO:0005654; GO:0016021; GO:0005886; GO:0009986; GO:0016324; GO:0005887; GO:0043025; GO:0030425; GO:0044297; GO:0005912; GO:0009925; GO:0043235; GO:0005901; GO:0005905	BMPR2	12168	TRUE	-0.249998	4.38438e-07	0.000709393	chr1
ENSMUSG00000037060	ENSMUST00000047040	Cavin3	protein_coding	protein_coding	caveolae associated 3 [Source:MGI Symbol;Acc:MGI:1923422]	0.5644	1662	GO:0051898; GO:0048511; GO:0070374; GO:0030866; GO:0032922; GO:1901003	GO:0005080; GO:0005515	GO:0005737; GO:0016020; GO:0032991; GO:0005829; GO:0005901	CAVIN3	109042	TRUE	0.293078	5.17038e-07	0.00075291	chr7
ENSMUSG00000022973	ENSMUST00000121759; ENSMUST00000170853; ENSMUST00000118390; ENSMUST00000154276; ENSMUST00000129041; ENSMUST00000129743; ENSMUST00000231524; ENSMUST00000125032; ENSMUST00000231472; ENSMUST00000118246; ENSMUST00000130813; ENSMUST00000156140	Synj1	protein_coding	protein_coding	synaptojanin 1 [Source:MGI Symbol;Acc:MGI:1354961]	0.4938	2818	GO:0046856; GO:0006629; GO:0048488; GO:0007420; GO:0007612; GO:0014015; GO:0032526; GO:0034097; GO:0048260; GO:1904980	GO:0003723; GO:0016791; GO:0003824; GO:0016787; GO:0003676; GO:0034595; GO:0052866; GO:0004439; GO:0004438; GO:0008022; GO:0017124; GO:0043812; GO:0044877; GO:0052658; GO:1990175	GO:0005737; GO:0005874; GO:0030132; GO:0032991; GO:0043005; GO:0097060; GO:0098688; GO:0098793	SYNJ1	104015	TRUE	-0.219647	6.11732e-07	0.000783069	chr16
ENSMUSG00000035027	ENSMUST00000143517; ENSMUST00000105331; ENSMUST00000048223; ENSMUST00000136743; ENSMUST00000123888; ENSMUST00000220329; ENSMUST00000128937; ENSMUST00000123241; ENSMUST00000218571	Map2k2	protein_coding	protein_coding	mitogen-activated protein kinase kinase 2 [Source:MGI Symbol;Acc:MGI:1346867]	0.5755	1203	GO:0006468; GO:0010629; GO:0070371; GO:0007507; GO:0048538; GO:0016310; GO:0045893; GO:0018108; GO:0043410; GO:0032872; GO:0090170; GO:2000641; GO:0071902; GO:0030878; GO:0048679; GO:0060324; GO:0050772; GO:0060425; GO:0000165; GO:2000147; GO:1903800; GO:0060440; GO:0060502; GO:0036289	GO:0005524; GO:0004672; GO:0016740; GO:0046872; GO:0000166; GO:0016301; GO:0005515; GO:0004674; GO:0004713; GO:0106310; GO:0043539; GO:0030165; GO:0004712; GO:0097110; GO:0005078; GO:0004708; GO:0060090	GO:0005829; GO:0005737; GO:0005634; GO:0016020; GO:0005794; GO:0048471; GO:0005739; GO:0005911; GO:0005783; GO:0005925; GO:0005770; GO:0005769; GO:0005938; GO:0005874; GO:0009898	MAP2K2	26396	TRUE	0.184885	6.45298e-07	0.000783069	chr10
ENSMUSG00000025658	ENSMUST00000026750; ENSMUST00000112513; ENSMUST00000139664	Cnksr2	protein_coding	protein_coding	connector enhancer of kinase suppressor of Ras 2 [Source:MGI Symbol;Acc:MGI:2661175]	0.4075	4207	GO:0009966; GO:0035556; GO:0099173	GO:0005515; GO:0042802; GO:0019901	GO:0016020; GO:0005737; GO:0014069; GO:0005886; GO:0043005; GO:0043025; GO:0098978; GO:0045211; GO:0099147	CNKSR2	245684	TRUE	-0.322605	8.30227e-07	0.000875449	chrX
ENSMUSG00000027215	ENSMUST00000099696; ENSMUST00000028644; ENSMUST00000116457; ENSMUST00000126772; ENSMUST00000111257; ENSMUST00000123565; ENSMUST00000145553; ENSMUST00000150508; ENSMUST00000111256; ENSMUST00000144168; ENSMUST00000124804	Cd82	protein_coding	protein_coding	CD82 antigen [Source:MGI Symbol;Acc:MGI:104651]	0.5535	948			GO:0016021; GO:0016020; GO:0005886; GO:0005887	CD82	12521	TRUE	0.36623	8.41662e-07	0.000875449	chr2
ENSMUSG00000021301	ENSMUST00000110516; ENSMUST00000220718; ENSMUST00000222241; ENSMUST00000221863; ENSMUST00000223317; ENSMUST00000222904; ENSMUST00000223189; ENSMUST00000221274; ENSMUST00000223550; ENSMUST00000223283	Hecw1	protein_coding	protein_coding	HECT, C2 and WW domain containing E3 ubiquitin protein ligase 1 [Source:MGI Symbol;Acc:MGI:2444115]	0.4789	3000	GO:0016567; GO:0000209; GO:0043161; GO:0048814; GO:2000650	GO:0005515; GO:0004842; GO:0016740; GO:0061630	GO:0005829; GO:0005737	HECW1	94253	TRUE	-0.382256	1.20955e-06	0.00103632	chr13
ENSMUSG00000047547	ENSMUST00000091609; ENSMUST00000140142; ENSMUST00000049575; ENSMUST00000146301	Cltb	protein_coding	protein_coding	clathrin, light polypeptide (Lcb) [Source:MGI Symbol;Acc:MGI:1921575]	0.5522	1737	GO:0006886; GO:0016192; GO:0072583	GO:0005198; GO:0042277; GO:0032050	GO:0030130; GO:0030132; GO:0005829; GO:0016020; GO:0005886; GO:0031410; GO:0043231; GO:0030659; GO:0030672; GO:0005905; GO:0005802; GO:0030125; GO:0030118; GO:0060170; GO:0098835; GO:0099631	CLTB	74325	TRUE	0.151603	1.23208e-06	0.00103632	chr13
ENSMUSG00000046138	ENSMUST00000175726; ENSMUST00000175764; ENSMUST00000177155; ENSMUST00000176773	9930021J03Rik	protein_coding	protein_coding	RIKEN cDNA 9930021J03 gene [Source:MGI Symbol;Acc:MGI:2444398]	0.4188	4841	GO:0008150	GO:0003674	GO:0005575	KIAA2026	240613	TRUE	-0.256098	1.26339e-06	0.00103632	chr19
ENSMUSG00000041268	ENSMUST00000118163; ENSMUST00000154092; ENSMUST00000123709; ENSMUST00000118600; ENSMUST00000127880; ENSMUST00000144736; ENSMUST00000128865; ENSMUST00000149709	Dmxl2	protein_coding	protein_coding	Dmx-like 2 [Source:MGI Symbol;Acc:MGI:2444630]	0.4327	5155	GO:0007283; GO:0007608; GO:0007420; GO:0042593; GO:0007035; GO:0007268; GO:0022038	GO:0005515; GO:0031267	GO:0008021; GO:0016020; GO:0031410; GO:0045202; GO:0030672; GO:0098992; GO:0043291	DMXL2	235380	TRUE	-0.29412	1.28099e-06	0.00103632	chr9
ENSMUSG00000023868	ENSMUST00000115715; ENSMUST00000115722; ENSMUST00000115724; ENSMUST00000233016; ENSMUST00000233652; ENSMUST00000141877; ENSMUST00000089085; ENSMUST00000115717; ENSMUST00000233052; ENSMUST00000115720; ENSMUST00000024647; ENSMUST00000136160; ENSMUST00000149440; ENSMUST00000115708	Pde10a	protein_coding	protein_coding	phosphodiesterase 10A [Source:MGI Symbol;Acc:MGI:1345143]	0.5153	3010	GO:0007165; GO:0008152; GO:0043951; GO:0006198; GO:0010738; GO:0010754; GO:0046069; GO:0106070	GO:0005515; GO:0004114; GO:0008081; GO:0046872; GO:0016787; GO:0003824; GO:0000166; GO:0030552; GO:0004115; GO:0047555; GO:0030553; GO:0004118; GO:0004112	GO:0005737; GO:0005829; GO:0016020; GO:0043025; GO:0043204	PDE10A	23984	TRUE	-0.272287	1.3907e-06	0.00103639	chr17
ENSMUSG00000020189	ENSMUST00000105275; ENSMUST00000220139; ENSMUST00000095310; ENSMUST00000217693; ENSMUST00000238838	Osbpl8	protein_coding	protein_coding	oxysterol binding protein-like 8 [Source:MGI Symbol;Acc:MGI:2443807]	0.4443	3287	GO:0051897; GO:0006869; GO:0120009; GO:0015918; GO:0030336; GO:0045444; GO:0015914; GO:0010891; GO:0032148; GO:0046326; GO:0046628; GO:0090204	GO:0008289; GO:0005515; GO:0070273; GO:0015485; GO:0015248; GO:0032934; GO:0001786; GO:0140343	GO:0005634; GO:0016020; GO:0016021; GO:0005783; GO:0005789; GO:0005829; GO:0043231; GO:0031965; GO:0032541	OSBPL8	237542	TRUE	-0.407441	1.42342e-06	0.00103639	chr10
ENSMUSG00000041341	ENSMUST00000221015; ENSMUST00000041055; ENSMUST00000220960; ENSMUST00000222395; ENSMUST00000221568	Atg2b	protein_coding	protein_coding	autophagy related 2B [Source:MGI Symbol;Acc:MGI:1923809]	0.4885	4601	GO:0006914; GO:0006869; GO:0120009; GO:0000422; GO:0000045; GO:0061709; GO:0044805; GO:0034727	GO:0005515; GO:0032266; GO:0120013	GO:0016020; GO:0005783; GO:0005789; GO:0034045; GO:0005811; GO:0019898; GO:0000407	ATG2B	76559	TRUE	-0.242958	1.50921e-06	0.00104653	chr12
ENSMUSG00000044308	ENSMUST00000055758; ENSMUST00000112251; ENSMUST00000131553; ENSMUST00000142563; ENSMUST00000152610; ENSMUST00000126165; ENSMUST00000125608; ENSMUST00000150301; ENSMUST00000136543; ENSMUST00000123890	Ubr3	protein_coding	protein_coding	ubiquitin protein ligase E3 component n-recognin 3 [Source:MGI Symbol;Acc:MGI:1861100]	0.4267	2481	GO:0001701; GO:0006511; GO:0016567; GO:0007608; GO:0071596; GO:0045732; GO:0042048; GO:0009792; GO:0001967; GO:1904878	GO:0008270; GO:0005515; GO:0016740; GO:0046872; GO:0061630; GO:0004842	GO:0016020; GO:0016021; GO:0005737; GO:0000151	UBR3	68795	TRUE	-0.251758	1.76625e-06	0.00110404	chr2
ENSMUSG00000000766	ENSMUST00000147171; ENSMUST00000105615; ENSMUST00000143875; ENSMUST00000105597; ENSMUST00000150374; ENSMUST00000056385; ENSMUST00000092734; ENSMUST00000105607; ENSMUST00000063036; ENSMUST00000152674; ENSMUST00000105601; ENSMUST00000105602; ENSMUST00000078634; ENSMUST00000000783; ENSMUST00000092731; ENSMUST00000092729; ENSMUST00000154906; ENSMUST00000105605; ENSMUST00000135502; ENSMUST00000123861;…	Oprm1	protein_coding	protein_coding	opioid receptor, mu 1 [Source:MGI Symbol;Acc:MGI:97441]	0.5021	1472	GO:0007626; GO:0007186; GO:0043951; GO:0007165; GO:0070588; GO:0051930; GO:0007204; GO:0071315; GO:0070374; GO:0051481; GO:0045471; GO:0045429; GO:0050769; GO:0007200; GO:0007193; GO:0060079; GO:0106072; GO:0042755; GO:0007218; GO:0045019; GO:2000310; GO:0019233; GO:0043950; GO:0048149; GO:0007191; GO:0007197; GO:0038003; GO:0031635; GO:0032100; GO:0061358; GO:0080135; GO:0002438; GO:0009314; GO:…	GO:0004930; GO:0005515; GO:0004979; GO:0004985; GO:0019904; GO:0008022; GO:0031681; GO:0005245; GO:0042277; GO:0001965; GO:0042923; GO:0031005; GO:0038047	GO:0005737; GO:0016020; GO:0016021; GO:0005886; GO:0005887; GO:0005925; GO:0042995; GO:0030425; GO:0043204; GO:0030424; GO:0042383; GO:0005768; GO:0043005; GO:0045121; GO:0099056; GO:0099055; GO:0032839; GO:0032590; GO:0097444	OPRM1	18390	TRUE	-0.846781	1.80804e-06	0.00110404	chr10
ENSMUSG00000033208	ENSMUST00000036387	S100b	protein_coding	protein_coding	S100 protein, beta polypeptide, neural [Source:MGI Symbol;Acc:MGI:98217]	0.4832	1484	GO:0008284; GO:2001015; GO:0031643; GO:0007613; GO:0043123; GO:0043065; GO:0001817; GO:0008360; GO:0007611; GO:0048168; GO:0006112; GO:0006874; GO:0050806; GO:0048169	GO:0005509; GO:0008270; GO:0046872; GO:0005102; GO:0048306; GO:0042802; GO:0042803; GO:0044548; GO:0043167; GO:0050786; GO:0048156	GO:0005634; GO:0005829; GO:0005737; GO:0005654; GO:0005615; GO:0048471; GO:0043231; GO:0005576; GO:0043025; GO:0001726	S100B	20203	TRUE	0.232335	1.82101e-06	0.00110404	chr10
ENSMUSG00000051951	ENSMUST00000162897; ENSMUST00000159265; ENSMUST00000070533	Xkr4	protein_coding	protein_coding	X-linked Kx blood group related 4 [Source:MGI Symbol;Acc:MGI:3528744]	0.4261	3592	GO:0006915; GO:0043652; GO:0070782; GO:1902742	GO:0017128	GO:0016021; GO:0016020; GO:0005886	XKR4	497097	TRUE	-0.536305	1.89541e-06	0.00110404	chr1
ENSMUSG00000046111	ENSMUST00000160946; ENSMUST00000058041; ENSMUST00000059410; ENSMUST00000161132; ENSMUST00000217140; ENSMUST00000098979; ENSMUST00000217407; ENSMUST00000160238; ENSMUST00000159156; ENSMUST00000162264; ENSMUST00000161533; ENSMUST00000163010; ENSMUST00000162689; ENSMUST00000160692	Cep295	protein_coding	protein_coding	centrosomal protein 295 [Source:MGI Symbol;Acc:MGI:2442521]	0.4177	2834	GO:0007099; GO:0010825; GO:1901985; GO:1903724; GO:1904951; GO:0046599	GO:0008017	GO:0005813; GO:0005829; GO:0005737; GO:0005886; GO:0005815; GO:0005856; GO:0005819; GO:0005814; GO:1990498	CEP295	319675	TRUE	-0.318132	2.10824e-06	0.00118078	chr9
ENSMUSG00000053580	ENSMUST00000168598; ENSMUST00000100330; ENSMUST00000124367; ENSMUST00000207807; ENSMUST00000167695; ENSMUST00000146162; ENSMUST00000089485; ENSMUST00000147975	Tanc2	protein_coding	protein_coding	tetratricopeptide repeat, ankyrin repeat and coiled-coil containing 2 [Source:MGI Symbol;Acc:MGI:2444121]	0.473	3385	GO:0001701; GO:0061001; GO:0060998; GO:0099519	GO:0005515; GO:0003674	GO:0045202; GO:0042995; GO:0098978; GO:0043197; GO:0030424; GO:0099092	TANC2	77097	TRUE	-0.209882	2.33208e-06	0.00125777	chr11
ENSMUSG00000030729	ENSMUST00000084935; ENSMUST00000208158; ENSMUST00000162108; ENSMUST00000054436	Pgm2l1	protein_coding	protein_coding	phosphoglucomutase 2-like 1 [Source:MGI Symbol;Acc:MGI:1918224]	0.4509	4220	GO:0005975; GO:0071704; GO:0006006	GO:0016868; GO:0016740; GO:0046872; GO:0003824; GO:0016853; GO:0047933	GO:0005737; GO:0005829	PGM2L1	70974	TRUE	-0.352316	2.56822e-06	0.00132054	chr7
ENSMUSG00000049658	ENSMUST00000038104; ENSMUST00000099262; ENSMUST00000109379; ENSMUST00000105697; ENSMUST00000167815; ENSMUST00000167203; ENSMUST00000163097	Bdp1	protein_coding	protein_coding	B double prime 1, subunit of RNA polymerase III transcription initiation factor IIIB [Source:MGI Symbol;Acc:MGI:1347077]	0.4414	3649	GO:0006355; GO:0070898	GO:0001156	GO:0005634; GO:0005654; GO:0000126	BDP1	544971	TRUE	-0.342222	2.62984e-06	0.00132054	chr13
ENSMUSG00000041624	ENSMUST00000115733; ENSMUST00000213060; ENSMUST00000212705	Gucy1a2	protein_coding	protein_coding	guanylate cyclase 1, soluble, alpha 2 [Source:MGI Symbol;Acc:MGI:2660877]	0.4123	2791	GO:0035556; GO:0009190; GO:0006182; GO:0019934; GO:0070482; GO:0007263; GO:0010750	GO:0020037; GO:0004383; GO:0016849; GO:0044877; GO:0005525; GO:0016829	GO:0005737; GO:0008074	GUCY1A2	234889	TRUE	-0.622113	3.08539e-06	0.00149765	chr9
ENSMUSG00000034647	ENSMUST00000038116; ENSMUST00000139901; ENSMUST00000233978; ENSMUST00000146090; ENSMUST00000233407; ENSMUST00000150766; ENSMUST00000143516; ENSMUST00000129756; ENSMUST00000135136; ENSMUST00000233045; ENSMUST00000124297	Ankrd12	protein_coding	protein_coding	ankyrin repeat domain 12 [Source:MGI Symbol;Acc:MGI:1914357]	0.4425	1980	GO:0008150	GO:0005515; GO:0003674	GO:0005829; GO:0005654	ANKRD12	106585	TRUE	-0.346341	3.22417e-06	0.0015135	chr17
ENSMUSG00000035614	ENSMUST00000066296; ENSMUST00000223166; ENSMUST00000221836; ENSMUST00000223311; ENSMUST00000221400; ENSMUST00000220487; ENSMUST00000222473; ENSMUST00000222425	Togaram1	protein_coding	protein_coding	TOG array regulator of axonemal microtubules 1 [Source:MGI Symbol;Acc:MGI:2684313]	0.3946	3027	GO:0030030; GO:0000226; GO:0090307; GO:0060271; GO:0035082; GO:0031116; GO:1905515	GO:0008017	GO:0005737; GO:0005856; GO:0042995; GO:0005929; GO:0005874; GO:0005930; GO:0036064; GO:0005815; GO:0072686; GO:0005876; GO:0005881	TOGARAM1	328108	TRUE	-0.243465	3.32592e-06	0.0015135	chr12
ENSMUSG00000009687	ENSMUST00000161805; ENSMUST00000161684; ENSMUST00000205301; ENSMUST00000162250; ENSMUST00000160006; ENSMUST00000162733; ENSMUST00000162116; ENSMUST00000159924; ENSMUST00000009831; ENSMUST00000162087; ENSMUST00000202395; ENSMUST00000160689; ENSMUST00000159753; ENSMUST00000161259	Fxyd5	protein_coding	protein_coding	FXYD domain-containing ion transport regulator 5 [Source:MGI Symbol;Acc:MGI:1201785]	0.545	853	GO:0043269; GO:0006811	GO:0099106; GO:0003779; GO:0045296	GO:0016020; GO:0016021	FXYD5	18301	TRUE	0.522302	4.29078e-06	0.0018599	chr7
ENSMUSG00000003299	ENSMUST00000003386; ENSMUST00000216824; ENSMUST00000216175; ENSMUST00000214124; ENSMUST00000216818; ENSMUST00000213977; ENSMUST00000216325; ENSMUST00000216466	Mrpl4	protein_coding	protein_coding	mitochondrial ribosomal protein L4 [Source:MGI Symbol;Acc:MGI:2137210]	0.5957	946	GO:0006412; GO:0032543	GO:0003735	GO:0005840; GO:0005739; GO:0005762; GO:0005737; GO:1990904; GO:0043229; GO:0005743	MRPL4	66163	TRUE	0.243819	4.40847e-06	0.0018599	chr9
ENSMUSG00000040297	ENSMUST00000048377; ENSMUST00000192422; ENSMUST00000191841; ENSMUST00000194388; ENSMUST00000194106; ENSMUST00000192570; ENSMUST00000191975	Suco	protein_coding	protein_coding	SUN domain containing ossification factor [Source:MGI Symbol;Acc:MGI:2138346]	0.3771	1489	GO:0001503; GO:0045669; GO:0046850; GO:0032967	GO:0003674	GO:0016020; GO:0016021; GO:0005783; GO:0005737; GO:0005791; GO:0030867	SUCO	226551	TRUE	-0.224915	4.47031e-06	0.0018599	chr1
ENSMUSG00000039652	ENSMUST00000079754; ENSMUST00000124158; ENSMUST00000154376; ENSMUST00000136286; ENSMUST00000126188; ENSMUST00000132580; ENSMUST00000123727; ENSMUST00000126781; ENSMUST00000133988; ENSMUST00000142973; ENSMUST00000131917; ENSMUST00000128642	Cpeb3	protein_coding	protein_coding	cytoplasmic polyadenylation element binding protein 3 [Source:MGI Symbol;Acc:MGI:2443075]	0.5492	2988	GO:0006412; GO:0006417; GO:0000122; GO:0017148; GO:0060213; GO:0061158; GO:0071230; GO:1900153; GO:0060998; GO:0045727; GO:0060999; GO:0048167; GO:1900273; GO:0007616; GO:1900365; GO:2000766; GO:0050955; GO:1900248	GO:0003723; GO:0003676; GO:0003730; GO:0045182; GO:0008135; GO:0005515; GO:0035925; GO:0043022; GO:0035613; GO:0000900	GO:0005634; GO:0005654; GO:0005737; GO:0005829; GO:0005886; GO:0030014; GO:0030425; GO:0030496; GO:0043005; GO:0098794; GO:0045202; GO:0042995; GO:0014069; GO:1990124; GO:0097440	CPEB3	208922	TRUE	-0.190002	4.72048e-06	0.00190943	chr19
ENSMUSG00000008489	ENSMUST00000107110; ENSMUST00000008633; ENSMUST00000107118; ENSMUST00000107120; ENSMUST00000102799; ENSMUST00000107124; ENSMUST00000128599; ENSMUST00000107116; ENSMUST00000107109; ENSMUST00000107111; ENSMUST00000176469; ENSMUST00000177109; ENSMUST00000147611; ENSMUST00000176362; ENSMUST00000144769; ENSMUST00000176151	Elavl2	protein_coding	protein_coding	ELAV like RNA binding protein 1 [Source:MGI Symbol;Acc:MGI:1100887]	0.4596	2132	GO:1990830	GO:0003723; GO:0003676	GO:1990904; GO:0045202	ELAVL2	15569	TRUE	-0.2954	4.92641e-06	0.00193888	chr4
ENSMUSG00000043991	ENSMUST00000051301	Pura	protein_coding	protein_coding	purine rich element binding protein A [Source:MGI Symbol;Acc:MGI:103079]	0.4331	5957	GO:0008284; GO:0000122; GO:0008283; GO:0050673; GO:0006357; GO:0030154; GO:0045892; GO:0042127; GO:0007399; GO:0043433; GO:0017148; GO:0046651; GO:0006268; GO:0098963	GO:0000977; GO:0032422; GO:0005515; GO:0003677; GO:0003723; GO:0000981; GO:0003700; GO:0140297; GO:0003690; GO:0046332; GO:0003697; GO:0003691; GO:0140416; GO:0000900	GO:0005634; GO:0014069; GO:0005737; GO:0043025; GO:0030425; GO:0098978; GO:0098794; GO:0032839	PURA	19290	TRUE	-0.297139	5.18224e-06	0.00198589	chr18
ENSMUSG00000032186	ENSMUST00000098552; ENSMUST00000064433; ENSMUST00000215614; ENSMUST00000164100; ENSMUST00000215036; ENSMUST00000215462; ENSMUST00000214581; ENSMUST00000213565; ENSMUST00000217233	Tmod2	protein_coding	protein_coding	tropomodulin 2 [Source:MGI Symbol;Acc:MGI:1355335]	0.4902	3214	GO:0051694; GO:0045745; GO:0007015; GO:0006936; GO:0007270; GO:0007611; GO:0030239	GO:0005523; GO:0003779	GO:0045202; GO:0005737; GO:0005856; GO:0043005; GO:0030426; GO:0005865; GO:0030016	TMOD2	50876	TRUE	-0.171276	5.68426e-06	0.00212241	chr9
ENSMUSG00000028053	ENSMUST00000186583; ENSMUST00000090933; ENSMUST00000198846; ENSMUST00000189824	Ash1l	protein_coding	protein_coding	ASH1 like histone lysine methyltransferase [Source:MGI Symbol;Acc:MGI:2183158]	0.4368	6646	GO:0045944; GO:0009791; GO:0010468; GO:0006954; GO:0050728; GO:0001501; GO:0006366; GO:0007338; GO:0006355; GO:0030317; GO:0032259; GO:0006325; GO:0043409; GO:0051568; GO:0000165; GO:0043124; GO:0007249; GO:0097676; GO:0046697; GO:0061038; GO:0002674; GO:0048733; GO:0034968; GO:1903699; GO:1903709	GO:0005515; GO:0003682; GO:0018024; GO:0016740; GO:0046872; GO:0003677; GO:0008168; GO:0042800; GO:0046974; GO:0046975	GO:0005634; GO:0005654; GO:0005794; GO:0005694; GO:0070161; GO:0005923	ASH1L	192195	TRUE	-0.191944	6.19231e-06	0.00225431	chr3
ENSMUSG00000025949	ENSMUST00000185317; ENSMUST00000190058; ENSMUST00000188799; ENSMUST00000187579; ENSMUST00000189925; ENSMUST00000081154; ENSMUST00000213081; ENSMUST00000186404; ENSMUST00000185263; ENSMUST00000097707; ENSMUST00000190847	Pikfyve	protein_coding	protein_coding	phosphoinositide kinase, FYVE type zinc finger containing [Source:MGI Symbol;Acc:MGI:1335106]	0.4585	3362	GO:0046854; GO:0035556; GO:0046488; GO:0016310; GO:0006629; GO:0030593; GO:0019886; GO:0042147; GO:0032438; GO:1903426; GO:0034504; GO:2000785; GO:0032288; GO:0006612; GO:0090385; GO:0019065; GO:0036289; GO:0090382; GO:1903100; GO:1904562	GO:0000285; GO:0005524; GO:0046872; GO:0016307; GO:0016740; GO:0000166; GO:0016301; GO:0005515; GO:0008270; GO:0004674; GO:0106310; GO:0016308; GO:0052810	GO:0005829; GO:0016020; GO:0048471; GO:0031410; GO:0005911; GO:0010008; GO:0031901; GO:0005768; GO:0031902; GO:0030670; GO:0045121; GO:0012506; GO:0000139	PIKFYVE	18711	TRUE	-0.279008	6.46591e-06	0.0022965	chr1
ENSMUSG00000055567	ENSMUST00000061620; ENSMUST00000114008; ENSMUST00000136727; ENSMUST00000212557; ENSMUST00000187179; ENSMUST00000152844	Unc80	protein_coding	protein_coding	unc-80, NALCN activator [Source:MGI Symbol;Acc:MGI:2652882]	0.4767	4696	GO:0034220; GO:0098655; GO:0055080	GO:0005515; GO:0005261	GO:0016020; GO:0016021; GO:0005886; GO:0030424; GO:0042995; GO:0030425; GO:0034703; GO:0034706	UNC80	329178	TRUE	-0.348024	6.78918e-06	0.0023539	chr1
ENSMUSG00000027799	ENSMUST00000029374; ENSMUST00000199803; ENSMUST00000199535; ENSMUST00000198259; ENSMUST00000199126; ENSMUST00000196612; ENSMUST00000196577; ENSMUST00000198315; ENSMUST00000197395; ENSMUST00000200526	Nbea	protein_coding	protein_coding	neurobeachin [Source:MGI Symbol;Acc:MGI:1347075]	0.4258	4180	GO:0008104; GO:0061484; GO:0006605; GO:0006892	GO:0019901; GO:0051018; GO:0005515	GO:0016020; GO:0005886; GO:0005829; GO:0045202; GO:0045211; GO:0012505; GO:0005802; GO:0005654; GO:0005634	NBEA	26422	TRUE	-0.232548	7.00104e-06	0.00237091	chr3
ENSMUSG00000028246	ENSMUST00000124440; ENSMUST00000029908; ENSMUST00000123319; ENSMUST00000123481; ENSMUST00000155220	Faxc	protein_coding	protein_coding	failed axon connections homolog [Source:MGI Symbol;Acc:MGI:1923382]	0.4965	2676	GO:0008150	GO:0003674	GO:0016020; GO:0016021; GO:0005737	FAXC	76132	TRUE	-0.302232	7.28772e-06	0.0024119	chr4
ENSMUSG00000016239	ENSMUST00000135758; ENSMUST00000016383; ENSMUST00000126147	Lonrf3	protein_coding	protein_coding	LON peptidase N-terminal domain and ring finger 3 [Source:MGI Symbol;Acc:MGI:1921615]	0.5316	1968	GO:0016567	GO:0005515; GO:0046872; GO:0061630	GO:0005737	LONRF3	74365	TRUE	-0.414514	7.46974e-06	0.00241721	chrX
ENSMUSG00000036819	ENSMUST00000108777; ENSMUST00000045279; ENSMUST00000147163; ENSMUST00000126158	Jmjd4	protein_coding	protein_coding	jumonji domain containing 4 [Source:MGI Symbol;Acc:MGI:2144404]	0.4977	4392	GO:0045905; GO:0018126; GO:0010629	GO:0046872; GO:0016491; GO:0051213; GO:0043565; GO:0016706; GO:0106156	GO:0005737; GO:0005634	JMJD4	194952	TRUE	-0.229487	7.88973e-06	0.0024884	chr11
ENSMUSG00000049100	ENSMUST00000193252; ENSMUST00000171554; ENSMUST00000166126; ENSMUST00000170695; ENSMUST00000195655	Pcdh10	protein_coding	protein_coding	protocadherin 10 [Source:MGI Symbol;Acc:MGI:1338042]	0.4752	5572	GO:0007156; GO:0007155	GO:0005509	GO:0016020; GO:0005886; GO:0016021; GO:0005887	PCDH10	18526	TRUE	-0.209344	8.0315e-06	0.0024884	chr3
ENSMUSG00000038910	ENSMUST00000043938; ENSMUST00000233823	Plcl2	protein_coding	protein_coding	phospholipase C-like 2 [Source:MGI Symbol;Acc:MGI:1352756]	0.4636	4309	GO:0007165; GO:0035556; GO:0006629; GO:0120163; GO:0048015; GO:0007214; GO:0032228; GO:0002322; GO:1900122; GO:0002337; GO:0050859	GO:0004435; GO:0008081; GO:0070679; GO:0050811	GO:0005737	PLCL2	224860	TRUE	-0.173716	8.30229e-06	0.00249154	chr17
ENSMUSG00000021466	ENSMUST00000021921; ENSMUST00000194663; ENSMUST00000195258; ENSMUST00000192155; ENSMUST00000222040; ENSMUST00000223515; ENSMUST00000195756; ENSMUST00000193953; ENSMUST00000195106; ENSMUST00000220588	Ptch1	protein_coding	protein_coding	patched 1 [Source:MGI Symbol;Acc:MGI:105373]	0.4973	3865	GO:0001701; GO:0045668; GO:0021522; GO:0000122; GO:0008285; GO:0072089; GO:0009957; GO:0003007; GO:0048568; GO:0030879; GO:0060644; GO:0050673; GO:0050680; GO:0042127; GO:0042593; GO:0016485; GO:0072659; GO:0043433; GO:0008544; GO:0007346; GO:0071397; GO:0010839; GO:0043616; GO:2000647; GO:0001843; GO:0032880; GO:0009887; GO:0035108; GO:0001658; GO:0040008; GO:0010875; GO:0007224; GO:0007389; GO:…	GO:0005515; GO:0030332; GO:0008158; GO:0015485; GO:0044877; GO:0005119; GO:0097108; GO:0005113; GO:0008201; GO:0008270	GO:0016021; GO:0005634; GO:0014069; GO:0016020; GO:0005886; GO:0005794; GO:0048471; GO:0043231; GO:0045177; GO:0005887; GO:0030496; GO:0044295; GO:0005929; GO:0005901; GO:0044294; GO:0005576	PTCH1	19206	TRUE	-0.23527	8.38383e-06	0.00249154	chr13
ENSMUSG00000024294	ENSMUST00000052838; ENSMUST00000165555; ENSMUST00000131073; ENSMUST00000234047; ENSMUST00000124288; ENSMUST00000150000	Mib1	protein_coding	protein_coding	MIB E3 ubiquitin protein ligase 1 [Source:MGI Symbol;Acc:MGI:2443157]	0.4642	3750	GO:0016567; GO:0001701; GO:0007507; GO:0030182; GO:0007219; GO:0001568; GO:0006511; GO:0001756; GO:0045665; GO:0045807; GO:0001841; GO:0006897; GO:0001947	GO:0005515; GO:0008270; GO:0046872; GO:0004842; GO:0016740	GO:0014069; GO:0005737; GO:0016020; GO:0005886; GO:0005815; GO:0005856; GO:0031410; GO:0005813	MIB1	225164	TRUE	-0.210455	8.81079e-06	0.00256605	chr18
ENSMUSG00000055540	ENSMUST00000068860; ENSMUST00000161358; ENSMUST00000159383; ENSMUST00000162129	Epha6	protein_coding	protein_coding	Eph receptor A6 [Source:MGI Symbol;Acc:MGI:108034]	0.4794	1969	GO:0006468; GO:0007169; GO:0018108; GO:0048013	GO:0005515; GO:0005524; GO:0004672; GO:0005003; GO:0000166; GO:0004713; GO:0004714	GO:0016021; GO:0016020; GO:0005654	EPHA6	13840	TRUE	-0.498376	9.23118e-06	0.00263577	chr16
ENSMUSG00000055204	ENSMUST00000014421; ENSMUST00000196919; ENSMUST00000168058; ENSMUST00000081914; ENSMUST00000197021; ENSMUST00000197327; ENSMUST00000200012; ENSMUST00000218526; ENSMUST00000199096; ENSMUST00000199424; ENSMUST00000197037; ENSMUST00000199965; ENSMUST00000199905; ENSMUST00000202226	Ankrd17	protein_coding	protein_coding	ankyrin repeat domain 17 [Source:MGI Symbol;Acc:MGI:1932101]	0.4363	5331	GO:0045787; GO:0045087; GO:0042742; GO:0002376; GO:0006275; GO:0007492; GO:1900087; GO:0043123; GO:1900245; GO:1900246; GO:0001955; GO:0051151	GO:0005515; GO:0003723; GO:0003682; GO:0003676	GO:0005634; GO:0005737; GO:0000785; GO:0005654; GO:0031965; GO:0001673	ANKRD17	81702	TRUE	-0.204193	1.00631e-05	0.00281805	chr5
ENSMUSG00000025860	ENSMUST00000141316; ENSMUST00000225851; ENSMUST00000224454; ENSMUST00000115094; ENSMUST00000126375; ENSMUST00000150635; ENSMUST00000115095; ENSMUST00000146874; ENSMUST00000145065; ENSMUST00000055483; ENSMUST00000026978	Xiap	protein_coding	protein_coding	X-linked inhibitor of apoptosis [Source:MGI Symbol;Acc:MGI:107572]	0.4364	3291	GO:0043066; GO:0043524; GO:0051402; GO:0043154; GO:0016567; GO:0016055; GO:0006915; GO:1990001; GO:0031398; GO:0051726; GO:0090263; GO:0060785; GO:0006974; GO:0010804; GO:0042981; GO:0046330; GO:0097340; GO:1902530	GO:0005515; GO:0016740; GO:0046872; GO:0004842; GO:0002020; GO:0042802; GO:0061630; GO:0043027; GO:0097110; GO:0120283	GO:0005634; GO:0005829; GO:0005737; GO:0032991; GO:0048471; GO:0005876	BIRC8,XIAP	11798	TRUE	-0.204484	1.08058e-05	0.00292254	chrX
ENSMUSG00000028572	ENSMUST00000030306; ENSMUST00000125627; ENSMUST00000107083; ENSMUST00000141448; ENSMUST00000146947; ENSMUST00000124202; ENSMUST00000148291; ENSMUST00000143326; ENSMUST00000125584; ENSMUST00000140128; ENSMUST00000156910	Hook1	protein_coding	protein_coding	hook microtubule tethering protein 1 [Source:MGI Symbol;Acc:MGI:1925213]	0.4067	1665	GO:0031122; GO:0030705; GO:0015031; GO:0007283; GO:0030154; GO:0007032; GO:0007030; GO:0008333; GO:0045022; GO:0007286; GO:0007040; GO:1905719; GO:1905198	GO:0005515; GO:0008017; GO:0003779; GO:0051959; GO:0042802; GO:0042803	GO:0005737; GO:0015630; GO:0005829; GO:0005856; GO:0005874; GO:0005813; GO:0070695; GO:0030897	HOOK1	77963	TRUE	-0.347897	1.08376e-05	0.00292254	chr4
ENSMUSG00000037833	ENSMUST00000070328; ENSMUST00000096000; ENSMUST00000225854	Sh2d4b	protein_coding	protein_coding	SH2 domain containing 4B [Source:MGI Symbol;Acc:MGI:1925182]	0.5098	1944			GO:0005737	SH2D4B	328381	TRUE	-0.982542	1.10541e-05	0.00292673	chr14
ENSMUSG00000046159	ENSMUST00000187510; ENSMUST00000063093; ENSMUST00000223242; ENSMUST00000190395	Chrm3	protein_coding	protein_coding	cholinergic receptor, muscarinic 3, cardiac [Source:MGI Symbol;Acc:MGI:88398]	0.5127	2298	GO:0007186; GO:0007165; GO:0007268; GO:0007187; GO:0098664; GO:0007271; GO:0019722; GO:0045907; GO:0046541; GO:0095500; GO:1905144; GO:0006939; GO:0045987; GO:0007213; GO:0007197; GO:0003063; GO:0032412; GO:1904695; GO:0003056	GO:0004930; GO:0005515; GO:0030594; GO:0004993; GO:0016907; GO:0042166; GO:0050997; GO:0031789	GO:0016021; GO:0016020; GO:0030054; GO:0005886; GO:0005887; GO:0005783; GO:0005789; GO:0045202; GO:0045211; GO:0070161; GO:0016323; GO:0030425; GO:0098978; GO:0099061; GO:0043679; GO:0032279; GO:0009925; GO:0099056	CHRM3	12671	TRUE	-0.382853	1.15059e-05	0.00299195	chr13
ENSMUSG00000026904	ENSMUST00000102735; ENSMUST00000155219; ENSMUST00000054484; ENSMUST00000112480; ENSMUST00000149527; ENSMUST00000147917; ENSMUST00000156534	Slc4a10	protein_coding	protein_coding	solute carrier family 4, sodium bicarbonate cotransporter-like, member 10 [Source:MGI Symbol;Acc:MGI:2150150]	0.4149	3099	GO:0006820; GO:0009791; GO:0035264; GO:0048854; GO:0006811; GO:0007601; GO:0098656; GO:0006814; GO:0035725; GO:0015698; GO:0051453; GO:1902600; GO:0055085; GO:0015701; GO:0050801; GO:0006486; GO:0006885; GO:0035641; GO:0009416; GO:0030641; GO:0048172; GO:0021860	GO:0008509; GO:0015293; GO:0015297; GO:0005452; GO:0022857; GO:0008510	GO:0016021; GO:0016020; GO:0005886; GO:0045202; GO:0016323; GO:0016324; GO:0042995; GO:0030425; GO:0043204; GO:0030424; GO:0005887; GO:0043025; GO:0098793; GO:0098794; GO:0097441; GO:0043679; GO:0097440; GO:0036477; GO:0097442	SLC4A10	94229	TRUE	-0.307897	1.22681e-05	0.00311176	chr2
ENSMUSG00000031302	ENSMUST00000118111; ENSMUST00000130555; ENSMUST00000151528; ENSMUST00000065858; ENSMUST00000147443; ENSMUST00000144860	Nlgn3	protein_coding	protein_coding	neuroligin 3 [Source:MGI Symbol;Acc:MGI:2444609]	0.517	4708	GO:0007155; GO:0050808; GO:0009966; GO:0007416; GO:0042391; GO:0050804; GO:0031644; GO:0032879; GO:0071709; GO:0007612; GO:0030534; GO:0035176; GO:0071625; GO:0048675; GO:0048709; GO:0007268; GO:0008542; GO:0060999; GO:0048488; GO:0006898; GO:0060134; GO:0051965; GO:2000311; GO:2000463; GO:0002087; GO:0097104; GO:0060024; GO:0060291; GO:0061002; GO:0090394; GO:0097105; GO:0060080; GO:0097151; GO:…	GO:0042043; GO:0060090; GO:0097110; GO:0038023; GO:0050839	GO:0016020; GO:0016021; GO:0005886; GO:0005887; GO:0045202; GO:0070161; GO:0009986; GO:0060076; GO:0043025; GO:0099060; GO:0098793; GO:0030425; GO:0098978; GO:0030139; GO:0098982; GO:0099055; GO:0060077	NLGN3	245537	TRUE	-0.14074	1.2394e-05	0.00311176	chrX
ENSMUSG00000024039	ENSMUST00000236853; ENSMUST00000067801; ENSMUST00000118504; ENSMUST00000078509; ENSMUST00000235180; ENSMUST00000151597; ENSMUST00000128351; ENSMUST00000143982; ENSMUST00000155814; ENSMUST00000151718; ENSMUST00000135425; ENSMUST00000236909	Cbs	protein_coding	protein_coding	cystathionine beta-synthase [Source:MGI Symbol;Acc:MGI:88285]	0.5538	1738	GO:0006535; GO:0043066; GO:0071456; GO:0008652; GO:0060135; GO:0043506; GO:0006801; GO:0001974; GO:0050667; GO:0021587; GO:0042262; GO:0097746; GO:0006563; GO:0019448; GO:0001958; GO:0060351; GO:0006565; GO:0010749; GO:0051593; GO:0019344; GO:0019346; GO:0070814; GO:0019343; GO:0031667; GO:0043418; GO:0044238; GO:0071704; GO:0006790	GO:0046872; GO:0016829; GO:0042802; GO:0042803; GO:0030170; GO:0020037; GO:0019899; GO:0031625; GO:0019825; GO:0043167; GO:0072341; GO:1904047; GO:0050421; GO:0070026; GO:0004122; GO:0070025	GO:0005634; GO:0005737	CBS	12411	TRUE	0.302032	1.2835e-05	0.00312082	chr17
ENSMUSG00000025132	ENSMUST00000106197; ENSMUST00000067936	Arhgdia	protein_coding	protein_coding	Rho GDP dissociation inhibitor (GDI) alpha [Source:MGI Symbol;Acc:MGI:2178103]	0.5989	2008	GO:0071260; GO:0050790; GO:0007266; GO:2000249; GO:0071526; GO:0030336; GO:0008360; GO:0032880; GO:0035023	GO:0005094; GO:0005515; GO:0005096; GO:0031267; GO:0019901; GO:0005504; GO:0051879	GO:0005737; GO:0045202; GO:0005829; GO:0005634; GO:0016020; GO:0001772; GO:0005615	ARHGDIA	192662	TRUE	0.161834	1.30533e-05	0.00312082	chr11
ENSMUSG00000037234	ENSMUST00000037182; ENSMUST00000211683; ENSMUST00000147613; ENSMUST00000211777; ENSMUST00000152144; ENSMUST00000210172; ENSMUST00000209996; ENSMUST00000210860; ENSMUST00000211292; ENSMUST00000209542	Hook3	protein_coding	protein_coding	hook microtubule tethering protein 3 [Source:MGI Symbol;Acc:MGI:2443554]	0.3907	3098	GO:0031122; GO:0030705; GO:0015031; GO:0007032; GO:0071539; GO:0034454; GO:0008333; GO:0045022; GO:0007040; GO:0097150; GO:0050768; GO:0022027; GO:0051645; GO:1905719	GO:0005515; GO:0008017; GO:0051959; GO:0042802; GO:0034452; GO:0045505; GO:0045503	GO:0005737; GO:0005794; GO:0005829; GO:0005856; GO:0034451; GO:0005874; GO:0005813; GO:0005801; GO:0070695; GO:0030897; GO:0000242	HOOK3	320191	TRUE	-0.23382	1.3211e-05	0.00312082	chr8
ENSMUSG00000045087	ENSMUST00000122088	S1pr5	protein_coding	protein_coding	sphingosine-1-phosphate receptor 5 [Source:MGI Symbol;Acc:MGI:2150641]	0.5712	2500	GO:0007186; GO:0007165; GO:0007189; GO:0019222; GO:0003376; GO:0045664	GO:0004930; GO:0038036	GO:0016021; GO:0016020; GO:0005886; GO:0005737	S1PR5	94226	TRUE	0.392385	1.32874e-05	0.00312082	chr9
ENSMUSG00000067242	ENSMUST00000198518; ENSMUST00000087252; ENSMUST00000199812; ENSMUST00000198045; ENSMUST00000197123; ENSMUST00000196090; ENSMUST00000199665; ENSMUST00000134832; ENSMUST00000130039	Lgi1	protein_coding	protein_coding	leucine-rich repeat LGI family, member 1 [Source:MGI Symbol;Acc:MGI:1861691]	0.4292	2615	GO:0030307; GO:0031175; GO:0007411; GO:0050806; GO:0099645	GO:0005515; GO:0005102	GO:0045202; GO:0005615; GO:0005576; GO:0098978; GO:0043083	LGI1	56839	TRUE	-0.150149	1.41749e-05	0.0032312	chr19
ENSMUSG00000044807	ENSMUST00000109135; ENSMUST00000000632; ENSMUST00000139465; ENSMUST00000136333	Zfp354c	protein_coding	protein_coding	zinc finger protein 354C [Source:MGI Symbol;Acc:MGI:1353621]	0.5061	1954	GO:0006355; GO:0006357	GO:0003677; GO:0046872; GO:0000978; GO:0000981	GO:0005634; GO:0005654	ZNF354C	30944	TRUE	-0.231913	1.44097e-05	0.0032312	chr11
ENSMUSG00000019756	ENSMUST00000006664; ENSMUST00000095926	Prl8a1	protein_coding	protein_coding	prolactin family 8, subfamily a, member 1 [Source:MGI Symbol;Acc:MGI:1920494]	0.4014	1273	GO:0007165; GO:0007565; GO:0008284; GO:0030879; GO:0031667; GO:0046427; GO:1903489	GO:0005179; GO:0005148	GO:0005576; GO:0016020; GO:0016021; GO:0005615		73244	TRUE	0.448653	1.4423e-05	0.0032312	chr13
ENSMUSG00000017291	ENSMUST00000017435; ENSMUST00000058496	Taok1	protein_coding	protein_coding	TAO kinase 1 [Source:MGI Symbol;Acc:MGI:1914490]	0.3965	12110	GO:0006468; GO:0016310; GO:0006281; GO:0006974; GO:0035556; GO:0006915; GO:0007095; GO:0051493; GO:0021954; GO:0071902; GO:0032147; GO:0032956; GO:0000226; GO:0032874; GO:0046330; GO:0070050; GO:0007026; GO:0070507; GO:0046777; GO:1901985; GO:0097194; GO:0000165; GO:0043408; GO:0048812	GO:0005524; GO:0004672; GO:0016740; GO:0000166; GO:0016301; GO:0004674; GO:0106310; GO:0019901; GO:0043539; GO:0008022; GO:0043014; GO:0048487; GO:0031489; GO:0030295	GO:0005737; GO:0048471; GO:0015630	TAOK1	216965	TRUE	-0.257991	1.50017e-05	0.00328597	chr11
ENSMUSG00000016150	ENSMUST00000115058; ENSMUST00000115059; ENSMUST00000016294; ENSMUST00000154433; ENSMUST00000126161; ENSMUST00000125231	Tenm1	protein_coding	protein_coding	teneurin transmembrane protein 1 [Source:MGI Symbol;Acc:MGI:1345185]	0.4356	7202	GO:0007165; GO:0007157; GO:0007218; GO:0090316; GO:0048666	GO:0005515; GO:0042802; GO:0046982; GO:0050839; GO:0042803	GO:0016021; GO:0016020; GO:0005886; GO:0005634; GO:0005737; GO:0005794; GO:0005783; GO:0005576; GO:0005856; GO:0005887; GO:0016607; GO:0016363; GO:0043005	TENM1	23963	TRUE	-0.477752	1.51191e-05	0.00328597	chrX
ENSMUSG00000052726	ENSMUST00000239229; ENSMUST00000120709; ENSMUST00000120796; ENSMUST00000119786; ENSMUST00000192840; ENSMUST00000145077; ENSMUST00000193606	Kcnt2	protein_coding	protein_coding	potassium channel, subfamily T, member 2 [Source:MGI Symbol;Acc:MGI:3036273]	0.4043	2293	GO:0006813; GO:0097623; GO:0006811; GO:0071805	GO:0005228; GO:0005267; GO:0015271; GO:0070089; GO:0022839	GO:0005886; GO:0016021; GO:0016020	KCNT2	240776	TRUE	-0.844494	1.53444e-05	0.00328597	chr1
ENSMUSG00000048000	ENSMUST00000174846; ENSMUST00000027475; ENSMUST00000172794; ENSMUST00000174583; ENSMUST00000164992; ENSMUST00000187038; ENSMUST00000173850; ENSMUST00000173173; ENSMUST00000172964; ENSMUST00000174501; ENSMUST00000174605; ENSMUST00000172976; ENSMUST00000174535; ENSMUST00000174334; ENSMUST00000173235; ENSMUST00000172736; ENSMUST00000173152; ENSMUST00000173148; ENSMUST00000173663; ENSMUST00000173636;…	Gigyf2	protein_coding	protein_coding	GRB10 interacting GYF protein 2 [Source:MGI Symbol;Acc:MGI:2138584]	0.4687	1892	GO:0061157; GO:0016441; GO:0009791; GO:0035264; GO:0017148; GO:0021522; GO:0008344; GO:0048873; GO:0050885; GO:0007631; GO:0019538; GO:0031571; GO:0050881; GO:0048009	GO:0005515; GO:0070064	GO:0005829; GO:0005794; GO:0032991; GO:0005783; GO:0005768; GO:0016020; GO:0043204; GO:0031982; GO:0010494; GO:0005737; GO:1990635; GO:0016021	GIGYF2	227331	TRUE	-0.202378	1.66789e-05	0.00351997	chr1
ENSMUSG00000061911	ENSMUST00000218583; ENSMUST00000049784; ENSMUST00000219060; ENSMUST00000219899; ENSMUST00000219231; ENSMUST00000021009; ENSMUST00000219463; ENSMUST00000217961; ENSMUST00000218198; ENSMUST00000220072; ENSMUST00000219744	Myt1l	protein_coding	protein_coding	myelin transcription factor 1-like [Source:MGI Symbol;Acc:MGI:1100511]	0.4876	2467	GO:0006355; GO:0045944; GO:0006357; GO:0007399; GO:0030154; GO:0048666; GO:0000122; GO:0030182; GO:0048663; GO:0048665	GO:0008270; GO:0005515; GO:0003677; GO:0046872; GO:0000978; GO:0000981; GO:0000977; GO:0001228; GO:0003700; GO:0001227; GO:0003713; GO:0044323; GO:0050897	GO:0005634; GO:0005694	MYT1L	17933	TRUE	-0.218707	1.78416e-05	0.00371156	chr12
ENSMUSG00000029629	ENSMUST00000155037; ENSMUST00000203459; ENSMUST00000115510; ENSMUST00000090632; ENSMUST00000115511; ENSMUST00000133776; ENSMUST00000203222; ENSMUST00000204565; ENSMUST00000203045; ENSMUST00000204150; ENSMUST00000214543	Phf14	protein_coding	protein_coding	PHD finger protein 14 [Source:MGI Symbol;Acc:MGI:1923539]	0.4196	2302	GO:0000122; GO:0008285; GO:0006357; GO:0048286; GO:0002314; GO:0010463; GO:0072201; GO:0060916; GO:2000584; GO:2000791	GO:0046872; GO:0042393; GO:0008270; GO:0140566	GO:0005634; GO:0005737; GO:0000785; GO:0070776	PHF14	75725	TRUE	-0.20718	1.82535e-05	0.00372445	chr6
ENSMUSG00000001794	ENSMUST00000207082; ENSMUST00000001845; ENSMUST00000126116; ENSMUST00000108196; ENSMUST00000148973; ENSMUST00000129761; ENSMUST00000141851; ENSMUST00000146852	Capns1	protein_coding	protein_coding	calpain, small subunit 1 [Source:MGI Symbol;Acc:MGI:88266]	0.5441	1039	GO:0030163; GO:0006508	GO:0005509; GO:0005515; GO:0044877; GO:0046872; GO:0004198	GO:0005829; GO:0005737; GO:0016020; GO:0005886; GO:0110158	CAPNS1	12336	TRUE	0.151194	1.84151e-05	0.00372445	chr7
ENSMUSG00000024298	ENSMUST00000159086; ENSMUST00000057501; ENSMUST00000168337	Zfp871	protein_coding	protein_coding	zinc finger protein 871 [Source:MGI Symbol;Acc:MGI:1921793]	0.421	5022	GO:0006355; GO:0006357	GO:0046872; GO:0000978; GO:0000981	GO:0005634		208292	TRUE	-0.243943	1.88995e-05	0.00375157	chr17
ENSMUSG00000058443	ENSMUST00000076364	Rpl10-ps3	protein_coding	protein_coding	ribosomal protein L10, pseudogene 3 [Source:MGI Symbol;Acc:MGI:3704336]	0.4818	768	GO:0006412; GO:0043066; GO:1990403; GO:0000122; GO:0006417; GO:0000027	GO:0003735; GO:0045182	GO:0005840; GO:0005634; GO:0005829; GO:0005737; GO:0032991; GO:1990904; GO:0045202; GO:0005783; GO:0022625; GO:0005790; GO:0022626	RPL10	100043346	TRUE	0.292803	1.90644e-05	0.00375157	chr9
ENSMUSG00000046160	ENSMUST00000056882	Olig1	protein_coding	protein_coding	oligodendrocyte transcription factor 1 [Source:MGI Symbol;Acc:MGI:1355334]	0.6105	2162	GO:0006355; GO:0006357; GO:0030182; GO:0048663; GO:0014003; GO:0048709	GO:0046983; GO:0003677; GO:0000978; GO:0000981; GO:0005515; GO:0003700	GO:0005634; GO:0005667	OLIG1	50914	TRUE	0.326579	1.95665e-05	0.00379903	chr16
ENSMUSG00000022419	ENSMUST00000096433; ENSMUST00000100660; ENSMUST00000023056; ENSMUST00000226687	Deptor	protein_coding	protein_coding	DEP domain containing MTOR-interacting protein [Source:MGI Symbol;Acc:MGI:2146322]	0.4899	3479	GO:0035556; GO:0007165; GO:0048731; GO:0006469; GO:0032007; GO:1904262; GO:0045792; GO:1903940; GO:2001236	GO:0005515		DEPTOR	97998	TRUE	-0.212498	2.11131e-05	0.00403607	chr15
ENSMUSG00000021244	ENSMUST00000168977; ENSMUST00000021670; ENSMUST00000101202; ENSMUST00000164558; ENSMUST00000169150; ENSMUST00000165803; ENSMUST00000167838; ENSMUST00000166605	Ylpm1	protein_coding	protein_coding	YLP motif containing 1 [Source:MGI Symbol;Acc:MGI:1926195]	0.4568	3405	GO:0000122; GO:0032204	GO:0001227	GO:0005634; GO:0005654; GO:0005829; GO:0016607	YLPM1	56531	TRUE	-0.196235	2.13417e-05	0.00403607	chr12
ENSMUSG00000020580	ENSMUST00000020904; ENSMUST00000220688; ENSMUST00000220542; ENSMUST00000221463	Rock2	protein_coding	protein_coding	Rho-associated coiled-coil containing protein kinase 2 [Source:MGI Symbol;Acc:MGI:107926]	0.3999	4846	GO:0007165; GO:0006468; GO:0016310; GO:0030036; GO:0007266; GO:0006939; GO:0006996; GO:0010825; GO:0032956; GO:0001934; GO:0007249; GO:0010595; GO:0010628; GO:0016525; GO:0018105; GO:0018107; GO:0030335; GO:0030866; GO:0035509; GO:0044788; GO:0045019; GO:0045616; GO:0051298; GO:0051496; GO:0071394; GO:0072659; GO:0150033; GO:1902004; GO:1902961; GO:1902966; GO:1902993; GO:1903140; GO:1903347	GO:0005524; GO:0004672; GO:0004674; GO:0031267; GO:0016740; GO:0046872; GO:0000166; GO:0016301; GO:0106310; GO:0072518	GO:0005737; GO:0016020; GO:0005886; GO:0005815; GO:0005856; GO:0005813; GO:0005829; GO:0036464	ROCK2	19878	TRUE	-0.214934	2.1885e-05	0.00404794	chr12
ENSMUSG00000020219	ENSMUST00000020440; ENSMUST00000219896; ENSMUST00000218481; ENSMUST00000218149	Timm13	protein_coding	protein_coding	translocase of inner mitochondrial membrane 13 [Source:MGI Symbol;Acc:MGI:1353432]	0.6152	668	GO:0015031; GO:0045039	GO:0046872	GO:0005739; GO:0016020; GO:0005743; GO:0005758; GO:0001650; GO:0042719	TIMM13	30055	TRUE	0.213379	2.19604e-05	0.00404794	chr10
ENSMUSG00000034912	ENSMUST00000037181; ENSMUST00000222987; ENSMUST00000113942; ENSMUST00000222623; ENSMUST00000178814; ENSMUST00000101379; ENSMUST00000223141; ENSMUST00000178724; ENSMUST00000223289; ENSMUST00000179729; ENSMUST00000177690; ENSMUST00000179577; ENSMUST00000179025	Mdga2	protein_coding	protein_coding	MAM domain containing glycosylphosphatidylinositol anchor 2 [Source:MGI Symbol;Acc:MGI:2444706]	0.4382	2764	GO:0001764; GO:0007399; GO:0007389; GO:1905606; GO:0099179	GO:0005515; GO:0003674	GO:0016020; GO:0016021; GO:0005886; GO:0031225; GO:0098978; GO:0098982	MDGA2	320772	TRUE	-0.240233	2.37538e-05	0.00432379	chr12
ENSMUSG00000011960	ENSMUST00000169707; ENSMUST00000163180; ENSMUST00000168928; ENSMUST00000012104; ENSMUST00000170452; ENSMUST00000169674; ENSMUST00000164294; ENSMUST00000164565; ENSMUST00000130921	Ccnt1	protein_coding	protein_coding	cyclin T1 [Source:MGI Symbol;Acc:MGI:1328363]	0.4566	1881	GO:0045944; GO:0006468; GO:0050790; GO:0006357; GO:0045737; GO:0007049; GO:0051301; GO:0006351; GO:0032968; GO:0043923; GO:0032786; GO:1903654; GO:1903655; GO:0009410	GO:0003682; GO:0005515; GO:0061575; GO:0003677; GO:0019901; GO:0140297; GO:0070063; GO:0016538; GO:0000976; GO:0140693; GO:0097322; GO:0017069	GO:0005634; GO:0005829; GO:0005654; GO:0008024; GO:0070691	CCNT1	12455	TRUE	-0.228389	2.48702e-05	0.00447111	chr15
ENSMUSG00000039841	ENSMUST00000115320; ENSMUST00000035930; ENSMUST00000115321; ENSMUST00000123098; ENSMUST00000155494	Zfp800	protein_coding	protein_coding	zinc finger protein 800 [Source:MGI Symbol;Acc:MGI:1889334]	0.437	2736	GO:0031018; GO:0090425	GO:0003674; GO:0003677; GO:0046872	GO:0005634	ZNF800	627049	TRUE	-0.387167	2.65835e-05	0.00472084	chr6
ENSMUSG00000037341	ENSMUST00000224372; ENSMUST00000072451; ENSMUST00000151845; ENSMUST00000115393; ENSMUST00000130938	Slc9a7	protein_coding	protein_coding	solute carrier family 9 (sodium/hydrogen exchanger), member 7 [Source:MGI Symbol;Acc:MGI:2444530]	0.4946	1738	GO:0055085; GO:0006812; GO:0006814; GO:1902600; GO:0006811; GO:0006813; GO:0051453; GO:0071805; GO:0098719; GO:0006885; GO:1905526	GO:0015299; GO:0015297; GO:0015385; GO:0015386	GO:0016021; GO:0016020; GO:0005794; GO:0005886; GO:0043231; GO:0005768; GO:0005802; GO:0055037; GO:0055038	SLC9A7	236727	TRUE	-0.331357	2.72299e-05	0.00477738	chrX
ENSMUSG00000044876	ENSMUST00000128495; ENSMUST00000108567; ENSMUST00000207176; ENSMUST00000054680; ENSMUST00000108566; ENSMUST00000149540; ENSMUST00000207329; ENSMUST00000137450; ENSMUST00000208192; ENSMUST00000108565; ENSMUST00000134933; ENSMUST00000136777	Zfp444	protein_coding	protein_coding	zinc finger protein 444 [Source:MGI Symbol;Acc:MGI:1923365]	0.598	1160	GO:0006357	GO:0000978; GO:0000981; GO:1990837	GO:0005634	ZNF444	72667	TRUE	0.187879	2.86328e-05	0.0049637	chr7
ENSMUSG00000050556	ENSMUST00000207917; ENSMUST00000144351; ENSMUST00000148226; ENSMUST00000059826	Kcnb1	protein_coding	protein_coding	potassium voltage gated channel, Shab-related subfamily, member 1 [Source:MGI Symbol;Acc:MGI:96666]	0.5336	4545	GO:0055085; GO:0006811; GO:0006813; GO:0051260; GO:2000671; GO:0034765; GO:0071805; GO:0097623; GO:0006887; GO:0072659; GO:0071277; GO:0007215; GO:0071333; GO:0090314; GO:0001508; GO:0045956; GO:0006904; GO:0010701; GO:0033605; GO:0042593; GO:0031669; GO:1900454; GO:0046676; GO:0045163; GO:0048678; GO:0098900; GO:1902065	GO:0005249; GO:0005216; GO:0005515; GO:0005244; GO:0005267; GO:0000149; GO:0046982; GO:0044325; GO:0047485; GO:0005251; GO:0015271	GO:0016020; GO:0008076; GO:0030424; GO:0016021; GO:0005886; GO:0048471; GO:0009986; GO:0045202; GO:0045211; GO:0016328; GO:0016324; GO:0042995; GO:0030425; GO:0042383; GO:0043204; GO:0043005; GO:0005783; GO:0043025; GO:0032590; GO:0032809; GO:1990635	KCNB1	16500	TRUE	-0.248024	3.06106e-05	0.00524414	chr2
ENSMUSG00000026219	ENSMUST00000027421; ENSMUST00000186465; ENSMUST00000189670; ENSMUST00000186648; ENSMUST00000187733; ENSMUST00000191187; ENSMUST00000185720; ENSMUST00000189841; ENSMUST00000190125; ENSMUST00000185909; ENSMUST00000186894; ENSMUST00000185567; ENSMUST00000185672; ENSMUST00000190464; ENSMUST00000190474; ENSMUST00000189496; ENSMUST00000190067; ENSMUST00000187818	Trip12	protein_coding	protein_coding	thyroid hormone receptor interactor 12 [Source:MGI Symbol;Acc:MGI:1309481]	0.4395	2564	GO:0006511; GO:0006281; GO:0006974; GO:0016567; GO:0000209; GO:0043161; GO:2000780; GO:0045995; GO:1901315; GO:2000779	GO:0004842; GO:0016740; GO:0008270; GO:0061630; GO:0046966	GO:0016607; GO:0005654; GO:0005634	TRIP12	14897	TRUE	-0.179935	3.1805e-05	0.00538541	chr1
ENSMUSG00000026596	ENSMUST00000173929; ENSMUST00000166172; ENSMUST00000027888; ENSMUST00000190749	Abl2	protein_coding	protein_coding	v-abl Abelson murine leukemia viral oncogene 2 (arg, Abelson-related gene) [Source:MGI Symbol;Acc:MGI:87860]	0.5553	3797	GO:0006468; GO:0016310; GO:0007154; GO:0018108; GO:0023052; GO:0007204; GO:0010863; GO:0010976; GO:0051353; GO:0071300	GO:0005515; GO:0005524; GO:0004672; GO:0004715; GO:0016740; GO:0000166; GO:0016301; GO:0004713; GO:0000287; GO:0001784; GO:0030145		ABL2	11352	TRUE	-0.17398	3.46706e-05	0.00569762	chr1
ENSMUSG00000058897	ENSMUST00000197950; ENSMUST00000143830; ENSMUST00000080335; ENSMUST00000183368; ENSMUST00000106353; ENSMUST00000238846; ENSMUST00000198205	Col25a1	protein_coding	protein_coding	collagen, type XXV, alpha 1 [Source:MGI Symbol;Acc:MGI:1924268]	0.5027	3216	GO:0030198; GO:0060385	GO:0008201; GO:0042802; GO:0005201; GO:0030020; GO:0001540	GO:0016020; GO:0016021; GO:0005615; GO:0005576; GO:0005887; GO:0005581; GO:0031012; GO:0062023	COL25A1	77018	TRUE	-0.47514	3.49881e-05	0.00569762	chr3
ENSMUSG00000025880	ENSMUST00000026999; ENSMUST00000168918; ENSMUST00000174843; ENSMUST00000174411; ENSMUST00000172718	Smad7	protein_coding	protein_coding	SMAD family member 7 [Source:MGI Symbol;Acc:MGI:1100518]	0.5896	1623	GO:0006355; GO:0007179; GO:1990830; GO:0071560; GO:0000122; GO:0030514; GO:0035556; GO:0030154; GO:0031397; GO:0050821; GO:0043433; GO:0017015; GO:0030512; GO:0022409; GO:0055117; GO:0001657; GO:0010717; GO:0010801; GO:0010944; GO:0031398; GO:0031503; GO:0032436; GO:0032925; GO:0033137; GO:0034333; GO:0034616; GO:0051444; GO:0060394; GO:0009653; GO:0060395; GO:0030509; GO:0002725; GO:0030279; GO:…	GO:0005515; GO:0003677; GO:0046872; GO:0005518; GO:0031625; GO:0008013; GO:0034713; GO:0048185; GO:0070411; GO:0140416	GO:0005667; GO:0005634; GO:0005829; GO:0005737; GO:0005654; GO:0005886; GO:0032991; GO:0005813; GO:0001650; GO:0005912; GO:0071144	SMAD7	17131	TRUE	0.195692	3.50699e-05	0.00569762	chr18
ENSMUSG00000036990	ENSMUST00000173078; ENSMUST00000173286; ENSMUST00000173300; ENSMUST00000173868; ENSMUST00000174485; ENSMUST00000172614	Otud4	protein_coding	protein_coding	OTU domain containing 4 [Source:MGI Symbol;Acc:MGI:1098801]	0.416	2906	GO:0034122; GO:0006508; GO:0002376; GO:0045087; GO:0071108; GO:0070536; GO:0016579; GO:1901537; GO:1903093; GO:2000660	GO:0016787; GO:0008233; GO:0008234; GO:0004843; GO:0060090; GO:0061578	GO:0005829; GO:0005634; GO:0005737	OTUD4	73945	TRUE	-0.26342	3.5214e-05	0.00569762	chr8
ENSMUSG00000044726	ENSMUST00000060894	Erich5	protein_coding	protein_coding	glutamate rich 5 [Source:MGI Symbol;Acc:MGI:2447772]	0.4742	2383	GO:0008150	GO:0003674	GO:0005575	ERICH5	239368	TRUE	-0.860412	3.62733e-05	0.0057817	chr15
ENSMUSG00000043668	ENSMUST00000109621; ENSMUST00000176616; ENSMUST00000176034	Tox3	protein_coding	protein_coding	TOX high mobility group box family member 3 [Source:MGI Symbol;Acc:MGI:3039593]	0.5714	1727	GO:0045944; GO:0043524; GO:0042981; GO:0006357; GO:0045893; GO:0006915; GO:0019722	GO:0003682; GO:0003677; GO:0005515; GO:0042803; GO:0003713; GO:0031490; GO:0051219	GO:0005829; GO:0005654; GO:0005634	TOX3	244579	TRUE	-0.385704	3.65277e-05	0.0057817	chr8
ENSMUSG00000033004	ENSMUST00000161008; ENSMUST00000160758; ENSMUST00000239305; ENSMUST00000159855; ENSMUST00000162852; ENSMUST00000162762; ENSMUST00000161278; ENSMUST00000226961; ENSMUST00000162537	Mycbp2	protein_coding	protein_coding	MYC binding protein 2, E3 ubiquitin protein ligase [Source:MGI Symbol;Acc:MGI:2179432]	0.4658	6596	GO:0016567; GO:0019222; GO:0050790; GO:0048511; GO:0042177; GO:1902667; GO:0051493; GO:0007411; GO:0032922; GO:0031398; GO:0032880; GO:0021952; GO:0008045; GO:0048667; GO:0050905; GO:0008582; GO:0021785	GO:0046872; GO:0005515; GO:0016740; GO:0061630; GO:0005085; GO:0031267; GO:0042802; GO:0008270	GO:0110165; GO:0042995; GO:0030424; GO:0005634; GO:0005829; GO:0005654; GO:0005737; GO:0005886; GO:0015630; GO:0043231; GO:0005856	MYCBP2	105689	TRUE	-0.281922	3.76746e-05	0.00589911	chr14
ENSMUSG00000040537	ENSMUST00000088761; ENSMUST00000115386; ENSMUST00000050166; ENSMUST00000115388; ENSMUST00000088744; ENSMUST00000124121; ENSMUST00000197700; ENSMUST00000144241; ENSMUST00000154935; ENSMUST00000139048; ENSMUST00000139841; ENSMUST00000153427; ENSMUST00000136524; ENSMUST00000153889; ENSMUST00000123168; ENSMUST00000130315; ENSMUST00000136808; ENSMUST00000126384; ENSMUST00000196356; ENSMUST00000046838;…	Adam22	protein_coding	protein_coding	a disintegrin and metallopeptidase domain 22 [Source:MGI Symbol;Acc:MGI:1340046]	0.4729	2701	GO:0006508; GO:0008344; GO:0007229; GO:0014037; GO:0022011; GO:0099645; GO:0042063	GO:0004222; GO:0005515; GO:0008237	GO:0016020; GO:0016021; GO:0005886; GO:0042995; GO:0030424; GO:0098978; GO:0099061	ADAM22	11496	TRUE	-0.192269	4.0722e-05	0.00630844	chr5
ENSMUSG00000040265	ENSMUST00000159763; ENSMUST00000195403; ENSMUST00000086074; ENSMUST00000070330; ENSMUST00000193110; ENSMUST00000160665; ENSMUST00000161539; ENSMUST00000162330; ENSMUST00000160173; ENSMUST00000161155; ENSMUST00000161894; ENSMUST00000195768	Dnm3	protein_coding	protein_coding	dynamin 3 [Source:MGI Symbol;Acc:MGI:1341299]	0.4475	2858	GO:0006897; GO:0051491; GO:0061001; GO:0061002; GO:0098884; GO:0099173; GO:1903423; GO:0007416; GO:0046847; GO:0048488; GO:0016185; GO:0031623	GO:0005525; GO:0003924; GO:0016787; GO:0000166; GO:0031798; GO:0031802; GO:0050998; GO:0099186; GO:0005515; GO:0042802; GO:0008017	GO:0005856; GO:0005874; GO:0005737; GO:0005794; GO:0014069; GO:0030424; GO:0043083; GO:0043197; GO:0044327; GO:0045202; GO:0048471; GO:0061828; GO:0061829; GO:0098844; GO:0098978; GO:0005739; GO:0005886; GO:0016020; GO:0098793; GO:0001917	DNM3	103967	TRUE	-0.210745	4.15212e-05	0.00636455	chr1
ENSMUSG00000045128	ENSMUST00000054220; ENSMUST00000212796; ENSMUST00000212019; ENSMUST00000212129; ENSMUST00000212709; ENSMUST00000212494; ENSMUST00000213053; ENSMUST00000212378	Rpl18a	protein_coding	protein_coding	ribosomal protein L18A [Source:MGI Symbol;Acc:MGI:1924058]	0.5697	681	GO:0006412; GO:0002181	GO:0003735	GO:0005840; GO:0045202; GO:0014069; GO:0005737; GO:1990904; GO:0022625; GO:0005829; GO:0022626; GO:0042788	RPL18A	76808	TRUE	0.174316	4.304e-05	0.00652864	chr8
ENSMUSG00000054823	ENSMUST00000155861; ENSMUST00000136107; ENSMUST00000146919; ENSMUST00000139966; ENSMUST00000142395; ENSMUST00000143445; ENSMUST00000141781; ENSMUST00000153597; ENSMUST00000129959; ENSMUST00000147935	Nsd3	protein_coding	protein_coding	nuclear receptor binding SET domain protein 3 [Source:MGI Symbol;Acc:MGI:2142581]	0.4776	3534	GO:0006355; GO:0032259; GO:0045893; GO:0006325; GO:0010468; GO:0045892; GO:0016571; GO:2001255	GO:0016740; GO:0046872; GO:0008168; GO:0018024; GO:0042800; GO:0046975; GO:0140537; GO:0046976; GO:0005515	GO:0005634; GO:0005694; GO:0000785	NSD3	234135	TRUE	-0.162218	4.48275e-05	0.00672967	chr8
ENSMUSG00000036510	ENSMUST00000155527; ENSMUST00000142129; ENSMUST00000093249; ENSMUST00000145601; ENSMUST00000128860; ENSMUST00000126895; ENSMUST00000142475	Cdh8	protein_coding	protein_coding	cadherin 8 [Source:MGI Symbol;Acc:MGI:107434]	0.428	3314	GO:0007156; GO:0007155; GO:0098609; GO:0035249; GO:0000902; GO:0098742; GO:0007043; GO:0016339; GO:0034332; GO:0007268; GO:0050807; GO:0009409	GO:0005509; GO:0046872; GO:0045296; GO:0042802	GO:0016020; GO:0005886; GO:0016021; GO:0098978; GO:0043679; GO:0005912; GO:0016342; GO:0043083; GO:0097060	CDH8	12564	TRUE	-0.264222	4.71028e-05	0.00695866	chr8
ENSMUSG00000021699	ENSMUST00000133929; ENSMUST00000151111; ENSMUST00000122041; ENSMUST00000177907; ENSMUST00000129374; ENSMUST00000138938; ENSMUST00000120671; ENSMUST00000153234; ENSMUST00000119507; ENSMUST00000079975; ENSMUST00000135275; ENSMUST00000074103; ENSMUST00000134973; ENSMUST00000152630; ENSMUST00000119672; ENSMUST00000120664; ENSMUST00000151429; ENSMUST00000117879; ENSMUST00000117420; ENSMUST00000155459	Pde4d	protein_coding	protein_coding	phosphodiesterase 4D, cAMP specific [Source:MGI Symbol;Acc:MGI:99555]	0.4987	1882	GO:0007165; GO:0071222; GO:0035264; GO:0086004; GO:0032729; GO:0071320; GO:0007568; GO:0043951; GO:0001934; GO:0007613; GO:0030593; GO:0006198; GO:0065003; GO:0061028; GO:0050852; GO:0008277; GO:0022409; GO:0032743; GO:0071872; GO:1901898; GO:0043949; GO:0014911; GO:0048661; GO:0071875; GO:0002027; GO:0033137; GO:0010469; GO:0006939; GO:0032754; GO:0010880; GO:0060314; GO:1901844; GO:0045822; GO:…	GO:0004114; GO:0008081; GO:0005515; GO:0046872; GO:0016787; GO:0004115; GO:0044325; GO:0051117; GO:0019899; GO:0030552; GO:0031698; GO:0097110; GO:1901363; GO:0004112	GO:0005829; GO:0005737; GO:0016020; GO:0005886; GO:0005794; GO:0032991; GO:0005634; GO:0005815; GO:0016324; GO:0005856; GO:0030016; GO:0005813; GO:0034704; GO:0048471; GO:0005891; GO:0034705	PDE4D	238871	TRUE	-0.24891	4.73319e-05	0.00695866	chr13
ENSMUSG00000023845	ENSMUST00000041047; ENSMUST00000231515; ENSMUST00000232462; ENSMUST00000232515; ENSMUST00000231291; ENSMUST00000231666	Lnpep	protein_coding	protein_coding	leucyl/cystinyl aminopeptidase [Source:MGI Symbol;Acc:MGI:2387123]	0.4225	3912	GO:0060395; GO:0006508; GO:0009725; GO:0007165; GO:0030163; GO:0120163; GO:0045777; GO:0048169; GO:0043171; GO:0008217; GO:0010813	GO:0008270; GO:0008237; GO:0005515; GO:0046872; GO:0016787; GO:0008233; GO:0004177; GO:0042277; GO:0070006	GO:0005737; GO:0016020; GO:0016021; GO:0005886; GO:0048471; GO:0009986; GO:0043231; GO:0005887; GO:0012505; GO:0043025; GO:0031982; GO:0030659; GO:0043229; GO:0032593	LNPEP	240028	TRUE	-0.289596	4.77864e-05	0.00695866	chr17
ENSMUSG00000027438	ENSMUST00000136513; ENSMUST00000028926; ENSMUST00000140647	Napb	protein_coding	protein_coding	N-ethylmaleimide sensitive fusion protein attachment protein beta [Source:MGI Symbol;Acc:MGI:104562]	0.4417	3937	GO:0015031; GO:0006886; GO:0035249; GO:0016192; GO:0032984; GO:0010807; GO:0002090; GO:0048488; GO:0035494; GO:0043462	GO:0005515; GO:0000149; GO:0019905; GO:0005483	GO:0016020; GO:0098978; GO:0031201; GO:0043209; GO:0098793; GO:0098794; GO:0070044	NAPB	17957	TRUE	-0.148204	4.83263e-05	0.0069676	chr2
ENSMUSG00000035045	ENSMUST00000150123; ENSMUST00000082183; ENSMUST00000145362; ENSMUST00000127461	Zc3h12b	protein_coding	protein_coding	zinc finger CCCH-type containing 12B [Source:MGI Symbol;Acc:MGI:2442133]	0.4731	3105	GO:0090502	GO:0046872; GO:0016787; GO:0003729; GO:0004518; GO:0004519; GO:0004521	GO:0005634; GO:0036464	ZC3H12B	547176	TRUE	-0.312322	4.89093e-05	0.00698252	chrX
ENSMUSG00000034584	ENSMUST00000051014; ENSMUST00000132410; ENSMUST00000139096	Exph5	protein_coding	protein_coding	exophilin 5 [Source:MGI Symbol;Acc:MGI:2443248]	0.4607	3678	GO:0006886; GO:0071985; GO:0003334; GO:0050714; GO:0045921	GO:0031267; GO:0005515	GO:0005768	EXPH5	320051	TRUE	-0.676961	5.04801e-05	0.00710176	chr9
ENSMUSG00000034160	ENSMUST00000119299; ENSMUST00000155713; ENSMUST00000044475; ENSMUST00000153979; ENSMUST00000150161; ENSMUST00000155792; ENSMUST00000147635	Ogt	protein_coding	protein_coding	O-linked N-acetylglucosamine (GlcNAc) transferase (UDP-N-acetylglucosamine:polypeptide-N-acetylglucosaminyl transferase) [Source:MGI Symbol;Acc:MGI:1339639]	0.4409	2793	GO:0071222; GO:0010628; GO:0045944; GO:0006915; GO:0071333; GO:0032868; GO:0006357; GO:0046626; GO:0001933; GO:0006486; GO:0006493; GO:0051571; GO:0006325; GO:0048015; GO:0001934; GO:0031397; GO:0048511; GO:0060548; GO:0016485; GO:0035020; GO:0080182; GO:0120162; GO:0032922; GO:0045893; GO:1902459; GO:0000122; GO:0030336; GO:0030512; GO:1902455; GO:0043981; GO:0043982; GO:0043984; GO:1900095; GO:…	GO:0005515; GO:0044877; GO:0016740; GO:0016757; GO:0008289; GO:0042802; GO:0019904; GO:0042277; GO:0005547; GO:0031490; GO:0003824; GO:0008080; GO:0097363; GO:0016262	GO:0005739; GO:0005634; GO:0005829; GO:0005737; GO:0005654; GO:0016020; GO:0005886; GO:0032991; GO:0042995; GO:0043005; GO:0043025; GO:0031966; GO:0000791; GO:0016580; GO:0000123; GO:0044545; GO:0042588; GO:0017122	OGT	108155	TRUE	-0.225462	5.08784e-05	0.00710176	chrX
ENSMUSG00000019738	ENSMUST00000019882; ENSMUST00000149654; ENSMUST00000108193; ENSMUST00000108192; ENSMUST00000145559; ENSMUST00000138118; ENSMUST00000150841; ENSMUST00000138886	Polr2i	protein_coding	protein_coding	polymerase (RNA) II (DNA directed) polypeptide I [Source:MGI Symbol;Acc:MGI:1917170]	0.5718	521	GO:0006351; GO:0006366; GO:0006367; GO:0006379; GO:0006283; GO:0001193	GO:0008270; GO:0003676; GO:0046872; GO:0003899	GO:0005634; GO:0005654; GO:0005730; GO:0000428; GO:0005665	POLR2I	69920	TRUE	0.316769	5.12076e-05	0.00710176	chr7
ENSMUSG00000061111	ENSMUST00000135515; ENSMUST00000034913	Mcrip1	protein_coding	protein_coding	MAPK regulated corepressor interacting protein 1 [Source:MGI Symbol;Acc:MGI:2384752]	0.5913	1230	GO:0010717	GO:0003674	GO:0005634; GO:0005737; GO:0010494	MCRIP1	192173	TRUE	0.224845	5.26088e-05	0.00722726	chr11
ENSMUSG00000034653	ENSMUST00000037763; ENSMUST00000201099; ENSMUST00000201507; ENSMUST00000202176	Ythdc2	protein_coding	protein_coding	YTH domain containing 2 [Source:MGI Symbol;Acc:MGI:2448561]	0.3948	3316	GO:0051321; GO:0007283; GO:0030154; GO:0048477; GO:0007286; GO:0048599; GO:0051729; GO:0034612; GO:0044829; GO:0070555	GO:0005515; GO:0003723; GO:0005524; GO:0003676; GO:0004386; GO:0016787; GO:0000166; GO:0003724; GO:0016887; GO:0070063; GO:0008186; GO:0034458; GO:1990247	GO:0005737; GO:0005634; GO:0005783; GO:0048471; GO:0035770	YTHDC2	240255	TRUE	-0.218116	5.43455e-05	0.00738935	chr18
ENSMUSG00000001173	ENSMUST00000001202; ENSMUST00000115020; ENSMUST00000142719; ENSMUST00000144664; ENSMUST00000146486; ENSMUST00000154732; ENSMUST00000115013	Ocrl	protein_coding	protein_coding	OCRL, inositol polyphosphate-5-phosphatase [Source:MGI Symbol;Acc:MGI:109589]	0.4504	2667	GO:0007165; GO:0001701; GO:0046856; GO:0030030; GO:0006629; GO:0043087; GO:0060271; GO:0046855	GO:0003824; GO:0004445; GO:0016787; GO:0016791; GO:0052658; GO:0052659; GO:0031267; GO:0005096; GO:0004439; GO:0034485; GO:0052745	GO:0005634; GO:0005737; GO:0016020; GO:0005794; GO:0005886; GO:0031410; GO:0042995; GO:0005929; GO:0005768; GO:0005769; GO:0030670; GO:0031901; GO:0030136; GO:0001750; GO:0005905; GO:0005802	OCRL	320634	TRUE	-0.217585	5.48036e-05	0.00738935	chrX
ENSMUSG00000036499	ENSMUST00000219207; ENSMUST00000218291; ENSMUST00000218088; ENSMUST00000053484; ENSMUST00000218517	Eea1	protein_coding	protein_coding	early endosome antigen 1 [Source:MGI Symbol;Acc:MGI:2442192]	0.4551	3231	GO:0006897; GO:0006906; GO:0044788	GO:0046872; GO:0005515; GO:0042803; GO:0005545; GO:0030742	GO:0005829; GO:0005737; GO:0016020; GO:0005768; GO:0005769; GO:0031410; GO:0031901; GO:0044308; GO:0055037; GO:0019897; GO:0005969	EEA1	216238	TRUE	-0.300557	5.91498e-05	0.00786901	chr10
ENSMUSG00000022141	ENSMUST00000052965	Nipbl	protein_coding	protein_coding	NIPBL cohesin loading factor [Source:MGI Symbol;Acc:MGI:1913976]	0.4242	9423	GO:0007605; GO:0045944; GO:0000122; GO:0007507; GO:0003007; GO:0048701; GO:0035019; GO:0007049; GO:0010468; GO:0006357; GO:0009790; GO:0008104; GO:0007420; GO:0060325; GO:0045892; GO:0050890; GO:0006974; GO:0040018; GO:0042471; GO:1990414; GO:0045444; GO:0045778; GO:0035136; GO:0003151; GO:0042634; GO:0045995; GO:0035115; GO:0048557; GO:2001224; GO:0061038; GO:0031065; GO:0048592; GO:0048589; GO:…	GO:0003682; GO:0005515; GO:0042826; GO:0008022; GO:0047485; GO:0070087; GO:0036033; GO:1990841	GO:0005634; GO:0005829; GO:0000785; GO:0005654; GO:0005694; GO:0043231; GO:0032039; GO:0032116; GO:0090694	NIPBL	71175	TRUE	-0.20931	5.94418e-05	0.00786901	chr15
ENSMUSG00000027239	ENSMUST00000111309; ENSMUST00000069423; ENSMUST00000028672; ENSMUST00000090602	Mdk	protein_coding	protein_coding	midkine [Source:MGI Symbol;Acc:MGI:96949]	0.5796	828	GO:0009611; GO:0043524; GO:0010976; GO:0016477; GO:0048714; GO:0007165; GO:0050896; GO:0030154; GO:0007010; GO:0010838; GO:0051781; GO:0045582; GO:0010667; GO:0045785; GO:0090090; GO:2000249; GO:0048477; GO:0050729; GO:1900026; GO:0030335; GO:2001224; GO:1904036; GO:0010759; GO:0010718; GO:0007162; GO:2000347; GO:0030325; GO:0032735; GO:0030279; GO:0002232; GO:0071673; GO:1903039; GO:0044849; GO:…	GO:0008083; GO:0008201; GO:0005515; GO:0035374; GO:1904399	GO:0005737; GO:0005576; GO:0042995	MDK	17242	TRUE	0.374481	6.14976e-05	0.00806783	chr2
ENSMUSG00000029819	ENSMUST00000031843	Npy	protein_coding	protein_coding	neuropeptide Y [Source:MGI Symbol;Acc:MGI:97374]	0.5371	566	GO:0008284; GO:0008217; GO:0019731; GO:0050830; GO:0070374; GO:0045087; GO:0050829; GO:0007218; GO:0061844; GO:0010811; GO:0007268; GO:0007631; GO:1901215; GO:0045776; GO:0042117; GO:0002865; GO:0045964; GO:0019732; GO:0001878; GO:1904000; GO:0008343; GO:0032100; GO:0007568; GO:0021954; GO:0021987; GO:0031175; GO:0032903; GO:0048572; GO:0050909; GO:1904407	GO:0005179; GO:0001664; GO:0005184; GO:0031841	GO:0005576; GO:0005737; GO:0005615; GO:0005794; GO:0048471; GO:0031410; GO:0043005; GO:0043204; GO:0043195; GO:0098992	NPY	109648	TRUE	0.474286	6.2322e-05	0.00810298	chr6
ENSMUSG00000031010	ENSMUST00000169594; ENSMUST00000139764; ENSMUST00000089302; ENSMUST00000149021; ENSMUST00000174762; ENSMUST00000124097; ENSMUST00000133997	Usp9x	protein_coding	protein_coding	ubiquitin specific peptidase 9, X chromosome [Source:MGI Symbol;Acc:MGI:894681]	0.4061	3334	GO:0006511; GO:0016579; GO:0006508; GO:0071108; GO:0001764; GO:0007179; GO:0030509; GO:0032092; GO:0032435; GO:0042752; GO:0048675; GO:0050821; GO:0070536; GO:0071947; GO:1901537; GO:1904515	GO:0004843; GO:0016787; GO:0008233; GO:0008234; GO:0061578; GO:0070410; GO:1990380	GO:0005737; GO:0005829; GO:0005929; GO:0030426	USP9X	22284	TRUE	-0.231431	6.53557e-05	0.00842222	chrX
ENSMUSG00000000078	ENSMUST00000000080; ENSMUST00000222857; ENSMUST00000221734	Klf6	protein_coding	protein_coding	Kruppel-like factor 6 [Source:MGI Symbol;Acc:MGI:1346318]	0.4771	2046	GO:0045944	GO:0000978; GO:0001228; GO:1990837	GO:0001650; GO:0005654; GO:0005730; GO:0005829; GO:0043231	KLF6	23849	TRUE	-0.294193	6.94385e-05	0.00880877	chr13
ENSMUSG00000022016	ENSMUST00000123853; ENSMUST00000227808; ENSMUST00000227722; ENSMUST00000226416	Akap11	protein_coding	protein_coding	A kinase (PRKA) anchor protein 11 [Source:MGI Symbol;Acc:MGI:2684060]	0.4111	3468	GO:0050790; GO:0001934; GO:0008104; GO:0030866; GO:0003091; GO:0036010; GO:1903142	GO:0005515; GO:0034237; GO:0034236; GO:0008157; GO:0019207	GO:0005730; GO:0005829; GO:0005737; GO:0005886; GO:0032991; GO:0005777	AKAP11	219181	TRUE	-0.194061	6.95652e-05	0.00880877	chr14
ENSMUSG00000019726	ENSMUST00000223053; ENSMUST00000110559; ENSMUST00000220937; ENSMUST00000223527; ENSMUST00000231064; ENSMUST00000221717; ENSMUST00000221483; ENSMUST00000221587	Lyst	protein_coding	protein_coding	lysosomal trafficking regulator [Source:MGI Symbol;Acc:MGI:107448]	0.4542	3394	GO:0007040; GO:0032510; GO:0042267; GO:0043473	GO:0005515	GO:0015630	LYST	17101	TRUE	-0.245046	7.0454e-05	0.00884242	chr13
ENSMUSG00000057531	ENSMUST00000222583; ENSMUST00000222990; ENSMUST00000220555; ENSMUST00000221413; ENSMUST00000072329; ENSMUST00000110128; ENSMUST00000221393; ENSMUST00000222321; ENSMUST00000223265; ENSMUST00000222805; ENSMUST00000223524	Dtnbp1	protein_coding	protein_coding	dystrobrevin binding protein 1 [Source:MGI Symbol;Acc:MGI:2137586]	0.5465	1220	GO:0031532; GO:0050896; GO:0001934; GO:0031175; GO:0007517; GO:0048812; GO:0048813; GO:0006996; GO:0010628; GO:0032091; GO:2000300; GO:0007596; GO:1901215; GO:0002092; GO:0061002; GO:0008089; GO:0048490; GO:0032438; GO:0071901; GO:0006469; GO:0060155; GO:0014059; GO:0060159; GO:0001956; GO:0043506; GO:0061646; GO:0007420; GO:0060041	GO:0005515	GO:0005634; GO:0014069; GO:0030424; GO:0005737; GO:0016020; GO:0005886; GO:0005783; GO:0005789; GO:0015630; GO:0031410; GO:0045202; GO:0045211; GO:0030659; GO:0030426; GO:0042383; GO:0043005; GO:0043025; GO:0005768; GO:0010008; GO:0098978; GO:0030672; GO:0033162; GO:0043197; GO:0030496; GO:0016528; GO:0098685; GO:1904115; GO:0098686; GO:0031083; GO:0032279	DTNBP1	94245	TRUE	0.210117	7.1734e-05	0.00884242	chr13
ENSMUSG00000052727	ENSMUST00000064762; ENSMUST00000224702; ENSMUST00000223693; ENSMUST00000223725; ENSMUST00000224605; ENSMUST00000223820	Map1b	protein_coding	protein_coding	microtubule-associated protein 1B [Source:MGI Symbol;Acc:MGI:1306778]	0.4896	3353	GO:0045666; GO:0048675; GO:0071895; GO:0007399; GO:0000226; GO:0016358; GO:0061162; GO:0007026; GO:0007017; GO:0007409; GO:0001578; GO:0045773; GO:0031116; GO:0047497; GO:0032387; GO:0046907; GO:0007416; GO:0009410; GO:0009611; GO:0009612; GO:0009743; GO:0010035; GO:0014012; GO:0017085; GO:0021700; GO:0031114; GO:0031667; GO:0032355; GO:0033189; GO:0048666; GO:0048678; GO:0051915; GO:0071363; GO:…	GO:0005515; GO:0044877; GO:0003779; GO:0008017; GO:0008092; GO:0005543; GO:0005519	GO:0014069; GO:0005829; GO:0030424; GO:0005737; GO:0005886; GO:0043025; GO:0048471; GO:0045202; GO:0005856; GO:0042995; GO:0030425; GO:0005874; GO:0030426; GO:0043204; GO:0001750; GO:0043197; GO:0005875; GO:0097441; GO:0043196; GO:0097440; GO:0036477; GO:0097457	MAP1B	17755	TRUE	-0.212864	7.21549e-05	0.00884242	chr13
ENSMUSG00000021775	ENSMUST00000090543; ENSMUST00000143308; ENSMUST00000225491; ENSMUST00000225308	Nr1d2	protein_coding	protein_coding	nuclear receptor subfamily 1, group D, member 2 [Source:MGI Symbol;Acc:MGI:2449205]	0.4538	1942	GO:0006355; GO:0000122; GO:0045893; GO:0030522; GO:0030154; GO:0045944; GO:0048511; GO:0045892; GO:0019216; GO:0097009; GO:0050728; GO:0042752; GO:0050727; GO:0048512; GO:0009755; GO:0055088; GO:2001014	GO:0008270; GO:0003700; GO:0043565; GO:0005515; GO:0000978; GO:0003677; GO:0046872; GO:0004879; GO:1990837; GO:0001227; GO:0000987	GO:0005634; GO:0005654; GO:0005737	NR1D2	353187	TRUE	-0.298187	7.2415e-05	0.00884242	chr14
ENSMUSG00000058793	ENSMUST00000110158; ENSMUST00000103181; ENSMUST00000147456; ENSMUST00000125060; ENSMUST00000089461; ENSMUST00000138194	Cds2	protein_coding	protein_coding	CDP-diacylglycerol synthase (phosphatidate cytidylyltransferase) 2 [Source:MGI Symbol;Acc:MGI:1332236]	0.541	3198	GO:0006629; GO:0008654; GO:0016024; GO:0019354; GO:0140042; GO:0007602; GO:0070085; GO:0006189; GO:0006633	GO:0016740; GO:0016779; GO:0004605; GO:0016772	GO:0016020; GO:0016021; GO:0005783; GO:0005789	CDS2	110911	TRUE	-0.108111	7.34348e-05	0.00884242	chr2
ENSMUSG00000024395	ENSMUST00000233994; ENSMUST00000234549; ENSMUST00000025254; ENSMUST00000225404; ENSMUST00000225470; ENSMUST00000234678; ENSMUST00000224383; ENSMUST00000226112; ENSMUST00000225400; ENSMUST00000223753; ENSMUST00000225125; ENSMUST00000224328	Lims2	protein_coding	protein_coding	LIM and senescent cell antigen like domains 2 [Source:MGI Symbol;Acc:MGI:2385067]	0.5685	612	GO:0043066; GO:0098609; GO:0061351; GO:2000178; GO:0045216; GO:0007229; GO:1990705; GO:2001046; GO:2000346; GO:1904055; GO:1900026	GO:0046872; GO:0003674	GO:0110165; GO:0016020; GO:0005886; GO:0070161; GO:0005925; GO:0005737; GO:0005911	LIMS2	225341	TRUE	0.250406	7.34743e-05	0.00884242	chr18
ENSMUSG00000090122	ENSMUST00000134825	Kcne1l	protein_coding	protein_coding	potassium voltage-gated channel, Isk-related family, member 1-like, pseudogene [Source:MGI Symbol;Acc:MGI:1913490]	0.5781	1543	GO:0006811; GO:0008016; GO:0060048; GO:0060307; GO:0086011; GO:0086091; GO:0098915; GO:0060306; GO:1901381; GO:1902260; GO:1901379; GO:0060372; GO:0086005; GO:0097623; GO:1901380; GO:0086014; GO:2001257; GO:0086013; GO:1903765	GO:0005249; GO:0044325; GO:0005251; GO:0015459; GO:0086008; GO:1902282	GO:0016020; GO:0016021; GO:0005886; GO:0008076	KCNE5	66240	TRUE	0.389305	7.56486e-05	0.00902946	chrX
ENSMUSG00000045967	ENSMUST00000055946; ENSMUST00000155760	Gpr158	protein_coding	protein_coding	G protein-coupled receptor 158 [Source:MGI Symbol;Acc:MGI:2441697]	0.4852	5376	GO:0007186; GO:0007165; GO:0072659	GO:0004930; GO:0005515	GO:0016021; GO:0016020; GO:0005886	GPR158	241263	TRUE	-0.242928	7.84637e-05	0.0092304	chr2
ENSMUSG00000035992	ENSMUST00000046835; ENSMUST00000143650	Fnip1	protein_coding	protein_coding	folliculin interacting protein 1 [Source:MGI Symbol;Acc:MGI:2444668]	0.404	4496	GO:0001783; GO:0000122; GO:0043154; GO:0008285; GO:0009267; GO:0001932; GO:0001934; GO:0031334; GO:0033138; GO:0032008; GO:0002327; GO:0032007; GO:0002904; GO:0031929; GO:2000973; GO:0030183	GO:0005515; GO:0005085; GO:0019899; GO:0051087; GO:0042030	GO:0005829; GO:0005737; GO:0016020; GO:0005764; GO:0005765	FNIP1	216742	TRUE	-0.296376	7.85998e-05	0.0092304	chr11
ENSMUSG00000055945	ENSMUST00000232566; ENSMUST00000069742; ENSMUST00000163887	Prr18	protein_coding	protein_coding	proline rich 18 [Source:MGI Symbol;Acc:MGI:2443403]	0.6134	2373	GO:0008150	GO:0003674	GO:0005575	PRR18	320111	TRUE	0.320356	8.43615e-05	0.00978715	chr17
ENSMUSG00000040536	ENSMUST00000041606; ENSMUST00000108273; ENSMUST00000141105	Necab1	protein_coding	protein_coding	N-terminal EF-hand calcium binding protein 1 [Source:MGI Symbol;Acc:MGI:1916602]	0.4096	2522	GO:0001835; GO:0042984	GO:0005509; GO:0046872; GO:0042802	GO:0005829; GO:0005737; GO:0005654	NECAB1	69352	TRUE	-0.789301	8.50536e-05	0.00978715	chr4
ENSMUSG00000021188	ENSMUST00000021605; ENSMUST00000177183; ENSMUST00000177480; ENSMUST00000177536; ENSMUST00000176728; ENSMUST00000085086	Trip11	protein_coding	protein_coding	thyroid hormone receptor interactor 11 [Source:MGI Symbol;Acc:MGI:1924393]	0.475	3250	GO:0060348; GO:0051216; GO:0006888; GO:0007030; GO:0003281; GO:0060122; GO:0003413; GO:0006486; GO:0090161; GO:0099041	GO:0005515; GO:0031267	GO:0016607; GO:0005654; GO:0016020; GO:0005794; GO:0005793; GO:0005801; GO:0002079; GO:0002080; GO:0002081	TRIP11	109181	TRUE	-0.238276	8.5357e-05	0.00978715	chr12
ENSMUSG00000031012	ENSMUST00000156096; ENSMUST00000115436; ENSMUST00000115438; ENSMUST00000033321; ENSMUST00000115435; ENSMUST00000128095; ENSMUST00000139735; ENSMUST00000152358; ENSMUST00000128012; ENSMUST00000124710; ENSMUST00000132240; ENSMUST00000155989	Cask	protein_coding	protein_coding	calcium/calmodulin-dependent serine protein kinase (MAGUK family) [Source:MGI Symbol;Acc:MGI:1309489]	0.479	2912	GO:0006468; GO:0045944; GO:0006357; GO:0016310; GO:0051649; GO:0061045; GO:0072659; GO:0001953; GO:0008104; GO:0010839; GO:2000300; GO:0061003; GO:0090280; GO:0070509; GO:0046928; GO:0032024; GO:0090288	GO:0005515; GO:0005524; GO:0004672; GO:0044877; GO:0016740; GO:0000166; GO:0016301; GO:0005516; GO:0004674; GO:0106310; GO:0005102; GO:0030165; GO:0008022; GO:0042043	GO:0016020; GO:0016021; GO:0030054; GO:0005634; GO:0005730; GO:0045202; GO:0014069; GO:0005829; GO:0005737; GO:0005886; GO:0032991; GO:0048471; GO:0005911; GO:0043025; GO:0030425; GO:0016323; GO:0045121; GO:0005604; GO:0016363; GO:0098685; GO:0097060; GO:0042734; GO:0060170; GO:0005652; GO:0097440; GO:0031982; GO:0098846; GO:0110165	CASK	12361	TRUE	-0.145956	8.88667e-05	0.01011	chrX
ENSMUSG00000029212	ENSMUST00000199967; ENSMUST00000031122	Gabrb1	protein_coding	protein_coding	gamma-aminobutyric acid (GABA) A receptor, subunit beta 1 [Source:MGI Symbol;Acc:MGI:95619]	0.4406	7268	GO:0006811; GO:0034220; GO:0060078; GO:0060079; GO:0006821; GO:0007165; GO:0007268; GO:0042391; GO:0050877; GO:1902476; GO:0007214; GO:0071420; GO:0009636; GO:0021954; GO:0032570; GO:0042698	GO:0005230; GO:0004888; GO:0005216; GO:0004890; GO:0038023; GO:0005254; GO:0005231; GO:0030594; GO:1904315; GO:0050811; GO:0022851; GO:0015276; GO:0005253	GO:0016021; GO:0016020; GO:0005886; GO:0005634; GO:0005737; GO:0005887; GO:0045202; GO:0045211; GO:0070161; GO:0034707; GO:0005635; GO:0043005; GO:0030425; GO:0043235; GO:0098982; GO:1902711	GABRB1	14400	TRUE	-0.227512	9.07947e-05	0.0102492	chr5
ENSMUSG00000024187	ENSMUST00000114988; ENSMUST00000234262; ENSMUST00000234554; ENSMUST00000234687; ENSMUST00000141240; ENSMUST00000234175; ENSMUST00000118487; ENSMUST00000153582; ENSMUST00000151293	Fam234a	protein_coding	protein_coding	family with sequence similarity 234, member A [Source:MGI Symbol;Acc:MGI:2146854]	0.5488	2357	GO:0008150	GO:0003674	GO:0016020; GO:0016021; GO:0009986	FAM234A	106581	TRUE	0.247772	9.1914e-05	0.0102958	chr17
ENSMUSG00000034295	ENSMUST00000234462; ENSMUST00000037097; ENSMUST00000234526; ENSMUST00000234834; ENSMUST00000234199	Fhod3	protein_coding	protein_coding	formin homology 2 domain containing 3 [Source:MGI Symbol;Acc:MGI:1925847]	0.5474	3672	GO:0045214; GO:0030837; GO:0055003; GO:0030866; GO:0051639	GO:0003779; GO:0051015	GO:0005737; GO:0005856; GO:0005865; GO:0030018	FHOD3	225288	TRUE	-0.243901	9.98665e-05	0.0111012	chr18
ENSMUSG00000003452	ENSMUST00000203502; ENSMUST00000086829; ENSMUST00000111513; ENSMUST00000130270; ENSMUST00000003544; ENSMUST00000173408; ENSMUST00000174886; ENSMUST00000172926; ENSMUST00000140759	Bicd1	protein_coding	protein_coding	BICD cargo adaptor 1 [Source:MGI Symbol;Acc:MGI:1101760]	0.422	4633	GO:0033365; GO:0070507; GO:0048260; GO:0016032; GO:1904781; GO:0034063; GO:0072385; GO:0072393; GO:1900275; GO:1900276; GO:1900737	GO:0008093; GO:0070840; GO:0045505; GO:0031267; GO:0019901; GO:0034452; GO:0031871	GO:0005829; GO:0005794; GO:0048471; GO:0016020; GO:0031410; GO:0005813; GO:0005881; GO:0099503; GO:0005802	BICD1	12121	TRUE	-0.271606	0.000101553	0.0112032	chr6
ENSMUSG00000038039	ENSMUST00000057659; ENSMUST00000162984; ENSMUST00000162041; ENSMUST00000162860; ENSMUST00000160427; ENSMUST00000161570; ENSMUST00000160677; ENSMUST00000160416; ENSMUST00000160636; ENSMUST00000162965	Gcc2	protein_coding	protein_coding	GRIP and coiled-coil domain containing 2 [Source:MGI Symbol;Acc:MGI:1917547]	0.4218	2660	GO:0006622; GO:0031023; GO:0034067; GO:0034453; GO:0034499; GO:0042147; GO:0070861; GO:0071955; GO:0090161	GO:0042802	GO:0016020; GO:0005794; GO:0005829; GO:0005654; GO:0005802	GCC2	70297	TRUE	-0.231942	0.000104305	0.0113747	chr10
ENSMUSG00000032097	ENSMUST00000170489; ENSMUST00000217034; ENSMUST00000213697	Ddx6	protein_coding	protein_coding	DEAD (Asp-Glu-Ala-Asp) box polypeptide 6 [Source:MGI Symbol;Acc:MGI:104976]	0.4252	5199	GO:0035278; GO:0017148; GO:0019827; GO:0030182; GO:0045665; GO:0033962; GO:0019074; GO:0034063	GO:0005524; GO:0003676; GO:0003724; GO:0016787; GO:0000166; GO:0003723; GO:0003729; GO:0004386; GO:0016887; GO:0019904	GO:0005739; GO:0016442; GO:0005634; GO:0005730; GO:0005829; GO:0005737; GO:0000932; GO:0048471; GO:0010494; GO:0097227; GO:0005912; GO:0036464; GO:0001520; GO:0000792; GO:0033391; GO:0061830	DDX6	13209	TRUE	-0.122992	0.00010467	0.0113747	chr9
ENSMUSG00000037646	ENSMUST00000048646; ENSMUST00000227455; ENSMUST00000227309; ENSMUST00000228338; ENSMUST00000226579; ENSMUST00000227567; ENSMUST00000228738	Vps13b	protein_coding	protein_coding	vacuolar protein sorting 13B [Source:MGI Symbol;Acc:MGI:1916380]	0.4479	4167	GO:0008150; GO:0060612; GO:0007399; GO:0006869; GO:0016192; GO:0007030; GO:0001675; GO:0007417; GO:0036438; GO:0090168; GO:0032458	GO:0003674; GO:0032266	GO:0005575; GO:0002080; GO:0033116; GO:0000139; GO:0032588; GO:0033106	VPS13B	666173	TRUE	-0.210113	0.000110069	0.0118728	chr15
ENSMUSG00000052456	ENSMUST00000064314; ENSMUST00000209834; ENSMUST00000211702; ENSMUST00000211221	Get3	protein_coding	protein_coding	guided entry of tail-anchored proteins factor 3, ATPase [Source:MGI Symbol;Acc:MGI:1928379]	0.5586	789	GO:0006620; GO:0045048; GO:0071816	GO:0005524; GO:0016887; GO:0046872; GO:0016787; GO:0000166	GO:0005730; GO:0005654; GO:0005634; GO:0005737; GO:0005783; GO:0043529	GET3	56495	TRUE	0.179992	0.000113474	0.0121501	chr8
ENSMUSG00000026895	ENSMUST00000070112	Ndufa8	protein_coding	protein_coding	NADH:ubiquinone oxidoreductase subunit A8 [Source:MGI Symbol;Acc:MGI:1915625]	0.5436	861	GO:0006120; GO:0032981; GO:0009060; GO:0042776	GO:0044877	GO:0005739; GO:0016020; GO:0005743; GO:0005758; GO:0070469; GO:0005747	NDUFA8	68375	TRUE	0.18873	0.000117156	0.0124078	chr2
ENSMUSG00000005534	ENSMUST00000208839; ENSMUST00000091291; ENSMUST00000207100; ENSMUST00000207295; ENSMUST00000139504	Insr	protein_coding	protein_coding	insulin receptor [Source:MGI Symbol;Acc:MGI:96575]	0.4728	3254	GO:0006468; GO:0018108; GO:0007169; GO:0010629; GO:0008284; GO:0071363; GO:0051897; GO:0003007; GO:0001933; GO:0016310; GO:0050896; GO:0007186; GO:0001934; GO:0043410; GO:0042593; GO:0046777; GO:0006355; GO:0032148; GO:0045429; GO:0046326; GO:0008544; GO:0006898; GO:0032147; GO:0097242; GO:0034612; GO:0009887; GO:0010560; GO:0030335; GO:0043406; GO:2000252; GO:0002092; GO:0032869; GO:0033674; GO:…	GO:0004672; GO:0005524; GO:0004713; GO:0005515; GO:0004714; GO:0044877; GO:0016740; GO:0000166; GO:0016301; GO:0042802; GO:0005525; GO:0019901; GO:0019904; GO:0019903; GO:0031994; GO:0001540; GO:0038024; GO:0005198; GO:0043548; GO:0043560; GO:0005159; GO:0005009; GO:0051425; GO:0031405; GO:0031995; GO:0043423; GO:0043559	GO:0016020; GO:0005634; GO:0045202; GO:0005829; GO:0016021; GO:0005886; GO:0009897; GO:0030424; GO:0005887; GO:0043231; GO:0005764; GO:0043025; GO:0005768; GO:0005770; GO:0031410; GO:0005635; GO:0030425; GO:0044297; GO:0055038; GO:0043235; GO:0005901; GO:0032809; GO:0032590; GO:0005899; GO:0031981; GO:0060417	INSR	16337	TRUE	-0.212183	0.000117844	0.0124078	chr8
ENSMUSG00000037416	ENSMUST00000180611; ENSMUST00000041772; ENSMUST00000181907; ENSMUST00000224938; ENSMUST00000181828; ENSMUST00000181042	Dmxl1	protein_coding	protein_coding	Dmx-like 1 [Source:MGI Symbol;Acc:MGI:2443926]	0.3685	5806	GO:0007035	GO:0005515; GO:0003674	GO:0043291	DMXL1	240283	TRUE	-0.333646	0.000118437	0.0124078	chr18
ENSMUSG00000046178	ENSMUST00000162942; ENSMUST00000160300; ENSMUST00000060369	Nxph1	protein_coding	protein_coding	neurexophilin 1 [Source:MGI Symbol;Acc:MGI:107492]	0.4835	2577		GO:0005102	GO:0005576	NXPH1	18231	TRUE	-0.336995	0.000122776	0.0126883	chr6
ENSMUSG00000038664	ENSMUST00000144280; ENSMUST00000042824; ENSMUST00000140487; ENSMUST00000135159; ENSMUST00000124969; ENSMUST00000135600; ENSMUST00000130854	Herc1	protein_coding	protein_coding	HECT and RLD domain containing E3 ubiquitin protein ligase family member 1 [Source:MGI Symbol;Acc:MGI:2384589]	0.4335	4929	GO:0016567; GO:0007420; GO:0006914; GO:0031175; GO:0050885; GO:0021702; GO:0022038; GO:0010507	GO:0005515; GO:0004842; GO:0003674	GO:0005575	HERC1	235439	TRUE	-0.245826	0.000123394	0.0126883	chr9
ENSMUSG00000030016	ENSMUST00000204415; ENSMUST00000203273; ENSMUST00000204751; ENSMUST00000204580; ENSMUST00000204110; ENSMUST00000204202; ENSMUST00000203455; ENSMUST00000113836; ENSMUST00000113835; ENSMUST00000032088; ENSMUST00000203534; ENSMUST00000203808; ENSMUST00000203324; ENSMUST00000203891; ENSMUST00000204713; ENSMUST00000205166; ENSMUST00000203481; ENSMUST00000204120; ENSMUST00000203056; ENSMUST00000203806;…	Zfp638	protein_coding	protein_coding	zinc finger protein 638 [Source:MGI Symbol;Acc:MGI:1203484]	0.4182	2318	GO:0008380	GO:0008270; GO:0003723; GO:0003676; GO:0003677; GO:0046872	GO:0005634; GO:0005654; GO:0043231; GO:0016607	ZNF638	18139	TRUE	-0.233934	0.000123729	0.0126883	chr6
ENSMUSG00000024811	ENSMUST00000025729; ENSMUST00000168656; ENSMUST00000168973; ENSMUST00000167533; ENSMUST00000167724; ENSMUST00000168718; ENSMUST00000164665; ENSMUST00000166677; ENSMUST00000168654	Tnks2	protein_coding	protein_coding	tankyrase, TRF1-interacting ankyrin-related ADP-ribose polymerase 2 [Source:MGI Symbol;Acc:MGI:1921743]	0.4368	1668	GO:0035264; GO:0000723; GO:0000209; GO:0016055; GO:0090263; GO:0040014; GO:1904355; GO:0070198; GO:1904357; GO:0070212; GO:0070213; GO:0006471	GO:0005515; GO:0003950; GO:0016740; GO:0016757; GO:0046872; GO:0016779; GO:0019899; GO:0047485; GO:1990404	GO:0005634; GO:0005737; GO:0016020; GO:0000139; GO:0005794; GO:0048471; GO:0005694; GO:0005635; GO:0000781; GO:0000242	TNKS2	74493	TRUE	-0.174721	0.000126032	0.0127536	chr19
ENSMUSG00000039219	ENSMUST00000155553; ENSMUST00000129488; ENSMUST00000110536; ENSMUST00000110534; ENSMUST00000039538; ENSMUST00000110533; ENSMUST00000151182; ENSMUST00000222928; ENSMUST00000222346; ENSMUST00000149579; ENSMUST00000148941; ENSMUST00000151151	Arid4b	protein_coding	protein_coding	AT rich interactive domain 4B (RBP1-like) [Source:MGI Symbol;Acc:MGI:2137512]	0.4516	3156	GO:0006355; GO:0045944; GO:0007283; GO:0006366; GO:0006357; GO:0045893; GO:0006325; GO:1902459; GO:0000122; GO:0006349; GO:0030336; GO:0030512; GO:0034773; GO:0036124; GO:0097368; GO:1902455	GO:0003677; GO:0005515; GO:0000976	GO:0005634; GO:0005739; GO:0005829; GO:0005654; GO:0016580	ARID4B	94246	TRUE	-0.229595	0.000126914	0.0127536	chr13
ENSMUSG00000035653	ENSMUST00000130887; ENSMUST00000138980; ENSMUST00000055815; ENSMUST00000119481; ENSMUST00000189933	Lrfn5	protein_coding	protein_coding	leucine rich repeat and fibronectin type III domain containing 5 [Source:MGI Symbol;Acc:MGI:2144814]	0.4461	3167	GO:0050728; GO:0099560; GO:1905606; GO:0043031	GO:0005515	GO:0016020; GO:0016021; GO:0009986; GO:0098978; GO:0098982; GO:0099061	LRFN5	238205	TRUE	-0.205224	0.000126993	0.0127536	chr12
ENSMUSG00000034218	ENSMUST00000118282; ENSMUST00000232179; ENSMUST00000126598; ENSMUST00000132249; ENSMUST00000132403; ENSMUST00000150244	Atm	protein_coding	protein_coding	ataxia telangiectasia mutated [Source:MGI Symbol;Acc:MGI:107202]	0.4274	3729	GO:0016310; GO:0006974; GO:0006281; GO:0044238; GO:0006807; GO:0043170; GO:0016043; GO:0000723; GO:0006950; GO:0010604; GO:0051173; GO:0080090; GO:0022414; GO:0000077; GO:0010628; GO:0009791; GO:0035264; GO:0006468; GO:0051402; GO:0051726; GO:0007507; GO:0048538; GO:0043525; GO:0007049; GO:0036092; GO:0007420; GO:0010212; GO:0046777; GO:1904262; GO:0007140; GO:0007094; GO:0001666; GO:0001541; GO:…	GO:0005515; GO:0004674; GO:0016301; GO:0016740; GO:0000166; GO:0005524; GO:0035173; GO:0044877; GO:0003677; GO:0042802; GO:0106310; GO:0016303; GO:0047485; GO:0004672; GO:0004677	GO:0005634; GO:0031410; GO:0005730; GO:0005737; GO:0005654; GO:0000781; GO:0005815; GO:0043231; GO:0005856; GO:0005813; GO:0005819; GO:1990391	ATM	11920	TRUE	-0.288634	0.000130862	0.0130521	chr9
ENSMUSG00000027104	ENSMUST00000124737; ENSMUST00000112010; ENSMUST00000090802; ENSMUST00000055833; ENSMUST00000112007; ENSMUST00000112016; ENSMUST00000156455; ENSMUST00000100009; ENSMUST00000112017; ENSMUST00000173010; ENSMUST00000143714; ENSMUST00000136958; ENSMUST00000141050; ENSMUST00000154456; ENSMUST00000128531; ENSMUST00000129555; ENSMUST00000138098; ENSMUST00000125159; ENSMUST00000154965	Atf2	protein_coding	protein_coding	activating transcription factor 2 [Source:MGI Symbol;Acc:MGI:109349]	0.4121	2420	GO:0006355; GO:0006357; GO:0001701; GO:0010628; GO:0045944; GO:0010467; GO:0006915; GO:0030509; GO:0000122; GO:0016525; GO:0007507; GO:0098586; GO:0050680; GO:0060612; GO:0006974; GO:0043525; GO:0001934; GO:0006970; GO:0001865; GO:0000165; GO:0014070; GO:0042789; GO:0051091; GO:0002244; GO:0007254; GO:0034599; GO:0097049; GO:0001889; GO:0006606; GO:0018107; GO:0043967; GO:0043969; GO:0003151; GO:…	GO:0003700; GO:0043565; GO:0005515; GO:0044877; GO:0000978; GO:0003682; GO:0003677; GO:0046872; GO:0000981; GO:0000977; GO:0001228; GO:0042802; GO:0042803; GO:1990837; GO:0019901; GO:0046982; GO:0000987; GO:0008140; GO:0043522; GO:0061629; GO:1990841; GO:0010485; GO:0035497; GO:0044013	GO:0005634; GO:0005737; GO:0000785; GO:0005654; GO:0016020; GO:0005739; GO:0005741; GO:0090575; GO:0035861; GO:0016602; GO:1902562	ATF2	11909	TRUE	-0.181802	0.000133557	0.0132303	chr2
ENSMUSG00000046351	ENSMUST00000050101; ENSMUST00000152557; ENSMUST00000145451; ENSMUST00000125328; ENSMUST00000224779; ENSMUST00000223795	Zfp322a	protein_coding	protein_coding	zinc finger protein 322A [Source:MGI Symbol;Acc:MGI:2442566]	0.3993	1560	GO:0006357; GO:0006355; GO:1902459	GO:0003677; GO:0046872; GO:0000977; GO:0000981; GO:0005515; GO:0003700; GO:0000987	GO:0005829; GO:0005654; GO:0005634; GO:0005737; GO:0005813	ZNF322	218100	TRUE	-0.276097	0.000135954	0.0133321	chr13
ENSMUSG00000054640	ENSMUST00000234131; ENSMUST00000235015; ENSMUST00000163123; ENSMUST00000086538; ENSMUST00000163680; ENSMUST00000234923	Slc8a1	protein_coding	protein_coding	solute carrier family 8 (sodium/calcium exchanger), member 1 [Source:MGI Symbol;Acc:MGI:107956]	0.4688	5471	GO:0055085; GO:0007154; GO:0006811; GO:0006816; GO:0006814; GO:0035725; GO:0055074; GO:0099566; GO:0001666; GO:0002028; GO:0006874; GO:0006883; GO:0007204; GO:0007584; GO:0009410; GO:0009749; GO:0010763; GO:0010881; GO:0021537; GO:0030501; GO:0033198; GO:0035902; GO:0035994; GO:0036376; GO:0042542; GO:0051924; GO:0060402; GO:0070509; GO:0070588; GO:0071320; GO:0071456; GO:0086064; GO:0098719; GO:…	GO:0046872; GO:0005516; GO:0015297; GO:0005432; GO:0008092; GO:0030506; GO:0099580; GO:1905060	GO:0016021; GO:0016020; GO:0005886; GO:0030424; GO:0098794; GO:0005654; GO:0005739; GO:0005874; GO:0005887; GO:0014704; GO:0030018; GO:0030315; GO:0030425; GO:0042383; GO:0042995; GO:0043025; GO:0043197; GO:0043198; GO:0045202; GO:0045211; GO:0071944; GO:0099055	SLC8A1	20541	TRUE	-0.245767	0.000136415	0.0133321	chr17
ENSMUSG00000073982	ENSMUST00000106923; ENSMUST00000098230; ENSMUST00000209968	Rhog	protein_coding	protein_coding	ras homolog family member G [Source:MGI Symbol;Acc:MGI:1928370]	0.5632	991	GO:0007163; GO:0007264; GO:0045893; GO:0032956; GO:0016601; GO:0007266; GO:0007015; GO:0090630; GO:0008360; GO:1903078; GO:0030036; GO:0043652; GO:0008045; GO:1900027; GO:0060326; GO:0030031; GO:0030865; GO:1902622	GO:0005525; GO:0003924; GO:0005515; GO:0000166; GO:0019901	GO:0016020; GO:0005886; GO:0005938; GO:0031410; GO:0042995; GO:0005856	RHOG	56212	TRUE	0.265564	0.000144587	0.0140365	chr7
ENSMUSG00000021929	ENSMUST00000022496; ENSMUST00000225207	Kpna3	protein_coding	protein_coding	karyopherin (importin) alpha 3 [Source:MGI Symbol;Acc:MGI:1100863]	0.4038	2384	GO:0006606; GO:0015031; GO:0006607	GO:0005515; GO:0061608; GO:0008139; GO:0008022	GO:0005634; GO:0005737; GO:0005654; GO:0005829; GO:0042564	KPNA3	16648	TRUE	-0.266529	0.000147358	0.0142108	chr14
ENSMUSG00000042569	ENSMUST00000042281; ENSMUST00000108718	Dhrs7b	protein_coding	protein_coding	dehydrogenase/reductase (SDR family) member 7B [Source:MGI Symbol;Acc:MGI:2384931]	0.5088	2415	GO:0010468; GO:0006954; GO:0050873; GO:0060612; GO:0045892; GO:0006355; GO:0032091; GO:0006656; GO:0030223; GO:0008611; GO:0120161	GO:0016491; GO:0005515; GO:0003714; GO:0140297; GO:0000140	GO:0005634; GO:0016020; GO:0016021; GO:0005783; GO:0005789; GO:0005777; GO:0005667	DHRS7B	216820	TRUE	0.246668	0.000148574	0.0142338	chr11
ENSMUSG00000025733	ENSMUST00000043897; ENSMUST00000177122; ENSMUST00000177470; ENSMUST00000176522; ENSMUST00000176882; ENSMUST00000177062; ENSMUST00000176857; ENSMUST00000176602; ENSMUST00000175790; ENSMUST00000176583; ENSMUST00000176604; ENSMUST00000176591; ENSMUST00000177347; ENSMUST00000176709; ENSMUST00000175869; ENSMUST00000177315; ENSMUST00000176247	Rhot2	protein_coding	protein_coding	ras homolog family member T2 [Source:MGI Symbol;Acc:MGI:2384892]	0.5873	965	GO:0007264; GO:0007005; GO:0019725; GO:0010821; GO:0097345; GO:0047497	GO:0005525; GO:0005509; GO:0003924; GO:0046872; GO:0016787; GO:0000166	GO:0005739; GO:0016020; GO:0016021; GO:0005743; GO:0005741; GO:0031307	RHOT2	214952	TRUE	0.171722	0.000150115	0.0142874	chr17
ENSMUSG00000038116	ENSMUST00000145731; ENSMUST00000037401; ENSMUST00000152617; ENSMUST00000135796; ENSMUST00000132129; ENSMUST00000153822; ENSMUST00000131479; ENSMUST00000147234; ENSMUST00000132352; ENSMUST00000147242; ENSMUST00000122814	Phf20	protein_coding	protein_coding	PHD finger protein 20 [Source:MGI Symbol;Acc:MGI:2444148]	0.4859	1716	GO:0006355; GO:0006357; GO:0051571; GO:0006325; GO:0016573; GO:0045893; GO:0043981; GO:0043982; GO:0043984; GO:1900095	GO:0003677; GO:0046872	GO:0005634; GO:0071339; GO:0005829; GO:0005654; GO:0031965; GO:0000123; GO:0044545	PHF20	228829	TRUE	-0.177586	0.000154525	0.0146117	chr2
ENSMUSG00000075318	ENSMUST00000144254; ENSMUST00000028377; ENSMUST00000201378; ENSMUST00000202653; ENSMUST00000200829; ENSMUST00000100067; ENSMUST00000138368; ENSMUST00000239325; ENSMUST00000202508; ENSMUST00000202162	Scn2a	protein_coding	protein_coding	sodium channel, voltage-gated, type II, alpha [Source:MGI Symbol;Acc:MGI:98248]	0.4386	3343	GO:0055085; GO:0006811; GO:0034220; GO:0098655; GO:0006814; GO:0071456; GO:0051402; GO:0034765; GO:0007399; GO:0035725; GO:0019228; GO:0086010; GO:0099505; GO:0007613; GO:0008627	GO:0005216; GO:0005261; GO:0005515; GO:0005248; GO:0005244; GO:0005272; GO:0043522; GO:0031402; GO:0099508	GO:0016020; GO:0016021; GO:0005886; GO:0001518; GO:0030424; GO:0043005; GO:0098978; GO:0033270; GO:0014704; GO:0030315; GO:0033268; GO:0034706; GO:0043194; GO:0099056; GO:0031226	SCN2A	110876	TRUE	-0.367968	0.000156576	0.0147101	chr2
ENSMUSG00000006586	ENSMUST00000006761; ENSMUST00000150583; ENSMUST00000105566; ENSMUST00000098257; ENSMUST00000098256; ENSMUST00000139736	Runx1t1	protein_coding	protein_coding	RUNX1 translocation partner 1 [Source:MGI Symbol;Acc:MGI:104793]	0.4821	3332	GO:0006351; GO:0045892; GO:0006355; GO:0045444; GO:0010977; GO:0045599; GO:0051101	GO:0046872; GO:0003714; GO:0005515; GO:0042802; GO:0140297	GO:0005634; GO:0005654; GO:0017053; GO:0016363	RUNX1T1	12395	TRUE	-0.277831	0.000159338	0.0148736	chr4
ENSMUSG00000023036	ENSMUST00000066140; ENSMUST00000195239; ENSMUST00000193222	Pcdhgc4	protein_coding	protein_coding	protocadherin gamma subfamily C, 4 [Source:MGI Symbol;Acc:MGI:1935203]	0.5406	3465	GO:0007156; GO:0007155; GO:0043524; GO:0050808	GO:0005509; GO:0003674	GO:0016020; GO:0005886; GO:0016021	PCDHGC4	93707	TRUE	0.43723	0.000163498	0.0151647	chr18
ENSMUSG00000048732	ENSMUST00000056665	Klhl11	protein_coding	protein_coding	kelch-like 11 [Source:MGI Symbol;Acc:MGI:2388648]	0.4981	2393	GO:0008150	GO:0005515; GO:0003674	GO:0005575	KLHL11	217194	TRUE	-0.298974	0.000164781	0.015187	chr11
ENSMUSG00000037316	ENSMUST00000038498; ENSMUST00000210103; ENSMUST00000209948	Bag4	protein_coding	protein_coding	BCL2-associated athanogene 4 [Source:MGI Symbol;Acc:MGI:1914634]	0.4599	2608	GO:0006915; GO:0071356; GO:0042981; GO:0051496; GO:1903215; GO:0072659; GO:0050821; GO:0051897; GO:0045785; GO:0097178; GO:0071364; GO:0010763; GO:0033138; GO:0030838; GO:0090367; GO:2001145	GO:0051087; GO:0005515; GO:0044877; GO:0031625; GO:0000774	GO:0005634; GO:0005829; GO:0005737; GO:0005886; GO:0016020	BAG4	67384	TRUE	-0.187253	0.000167067	0.0153008	chr8
ENSMUSG00000052144	ENSMUST00000063854; ENSMUST00000204001; ENSMUST00000203940; ENSMUST00000203580; ENSMUST00000203067	Ppp4r2	protein_coding	protein_coding	protein phosphatase 4, regulatory subunit 2 [Source:MGI Symbol;Acc:MGI:3027896]	0.4183	2133	GO:0050790	GO:0019888	GO:0030289	PPP4R2	232314	TRUE	-0.172041	0.000170147	0.0154855	chr6
ENSMUSG00000018677	ENSMUST00000107098; ENSMUST00000018821; ENSMUST00000128825; ENSMUST00000153395; ENSMUST00000134669; ENSMUST00000141535; ENSMUST00000155104; ENSMUST00000142097; ENSMUST00000123688; ENSMUST00000149777; ENSMUST00000130436; ENSMUST00000154001; ENSMUST00000124755; ENSMUST00000147160; ENSMUST00000147860	Slc25a39	protein_coding	protein_coding	solute carrier family 25, member 39 [Source:MGI Symbol;Acc:MGI:1196386]	0.5857	917	GO:0006783; GO:0055085; GO:1990542; GO:0160007		GO:0016020; GO:0016021; GO:0005739; GO:0005743	SLC25A39	68066	TRUE	0.174888	0.000173769	0.0157169	chr11
ENSMUSG00000055720	ENSMUST00000216925; ENSMUST00000163329; ENSMUST00000213654; ENSMUST00000215592; ENSMUST00000217132; ENSMUST00000216841; ENSMUST00000214086; ENSMUST00000217129; ENSMUST00000216260; ENSMUST00000217180; ENSMUST00000215751; ENSMUST00000215936	Ubl7	protein_coding	protein_coding	ubiquitin-like 7 (bone marrow stromal cell-derived) [Source:MGI Symbol;Acc:MGI:1916709]	0.5288	810	GO:0006511	GO:0005515; GO:0031593	GO:0005829	UBL7	69459	TRUE	0.163998	0.00017617	0.0158357	chr9
ENSMUSG00000030451	ENSMUST00000205653; ENSMUST00000076226; ENSMUST00000164095; ENSMUST00000206537; ENSMUST00000205303; ENSMUST00000206990; ENSMUST00000206101; ENSMUST00000205678	Herc2	protein_coding	protein_coding	HECT and RLD domain containing E3 ubiquitin protein ligase 2 [Source:MGI Symbol;Acc:MGI:103234]	0.4938	6286	GO:0016567; GO:0007283; GO:0006281; GO:0006974; GO:0019538; GO:0043161	GO:0008270; GO:0046872; GO:0004842; GO:0016740; GO:0061630; GO:0031625; GO:0032183	GO:0005634; GO:0005829; GO:0005737; GO:0005886; GO:0005856; GO:0005743; GO:0016020; GO:0005814	HERC2	15204	TRUE	-0.182213	0.000177349	0.0158439	chr7
ENSMUSG00000041607	ENSMUST00000091789; ENSMUST00000114676; ENSMUST00000047865; ENSMUST00000143506; ENSMUST00000152071; ENSMUST00000142850; ENSMUST00000080658; ENSMUST00000133193; ENSMUST00000123251; ENSMUST00000153478; ENSMUST00000075372; ENSMUST00000102812; ENSMUST00000062446; ENSMUST00000114674; ENSMUST00000132369; ENSMUST00000150952	Mbp	protein_coding	protein_coding	myelin basic protein [Source:MGI Symbol;Acc:MGI:96925]	0.5566	1540	GO:0007605; GO:0042552; GO:0032755; GO:0000165; GO:0050771; GO:0009636; GO:0032570; GO:0034115; GO:0035633; GO:0061024; GO:1904685; GO:2000343	GO:0019911; GO:0005516; GO:0008289; GO:0002020	GO:0005634; GO:0005737; GO:0016020; GO:0071944; GO:0005886; GO:0043025; GO:0032991; GO:0009986; GO:0043209; GO:0042995; GO:0043218; GO:0033269	MBP	17196	TRUE	0.286231	0.00018198	0.0161585	chr18
ENSMUSG00000030701	ENSMUST00000107046; ENSMUST00000107045; ENSMUST00000107047; ENSMUST00000079176; ENSMUST00000107044; ENSMUST00000116287; ENSMUST00000107043; ENSMUST00000135255; ENSMUST00000151123; ENSMUST00000139708; ENSMUST00000138830; ENSMUST00000208812	Plekhb1	protein_coding	protein_coding	pleckstrin homology domain containing, family B (evectins) member 1 [Source:MGI Symbol;Acc:MGI:1351469]	0.546	1378	GO:0045595	GO:0005515; GO:0042803; GO:0008022	GO:0005737; GO:0016020; GO:0016021; GO:0001750	PLEKHB1	27276	TRUE	0.246884	0.000184044	0.0162428	chr7
ENSMUSG00000035284	ENSMUST00000077879; ENSMUST00000217386; ENSMUST00000213168; ENSMUST00000216856; ENSMUST00000215524	Vps13c	protein_coding	protein_coding	vacuolar protein sorting 13C [Source:MGI Symbol;Acc:MGI:2444207]	0.4483	4510	GO:0007005; GO:0032868; GO:0006869; GO:1905090; GO:0006623; GO:0045053	GO:0003674	GO:0005829; GO:0016020; GO:0005783; GO:0005789; GO:0005739; GO:0005764; GO:0005768; GO:0005770; GO:0005765; GO:0031902; GO:0005811; GO:0005741; GO:0019898; GO:0032127	VPS13C	320528	TRUE	-0.229833	0.000187967	0.016489	chr9
ENSMUSG00000053774	ENSMUST00000232016; ENSMUST00000115151; ENSMUST00000232666; ENSMUST00000232137	Ubxn7	protein_coding	protein_coding	UBX domain protein 7 [Source:MGI Symbol;Acc:MGI:2146388]	0.4236	4401	GO:0043161	GO:0005515; GO:0031625; GO:0043130; GO:0061629	GO:0005654; GO:0016604; GO:0034098; GO:0005634	UBXN7	224111	TRUE	-0.216698	0.000190994	0.0166542	chr16
ENSMUSG00000003847	ENSMUST00000151582; ENSMUST00000154474; ENSMUST00000169453; ENSMUST00000133026; ENSMUST00000149972; ENSMUST00000151114; ENSMUST00000125721; ENSMUST00000075922; ENSMUST00000148006; ENSMUST00000126397; ENSMUST00000077440; ENSMUST00000144100; ENSMUST00000126333; ENSMUST00000147588	Nfat5	protein_coding	protein_coding	nuclear factor of activated T cells 5 [Source:MGI Symbol;Acc:MGI:1859333]	0.4359	5764	GO:0006355; GO:0006366; GO:0010628; GO:0045944; GO:0070884; GO:0006357; GO:0006974; GO:0006351; GO:0071345; GO:1901224; GO:0062176; GO:1904996; GO:0033173; GO:0006970	GO:0003700; GO:0000978; GO:0003677; GO:0003682; GO:0000981; GO:0001228; GO:1990837	GO:0005634; GO:0005829; GO:0005737; GO:0005654; GO:0005667	NFAT5	54446	TRUE	-0.226982	0.000192536	0.0166887	chr8
ENSMUSG00000039262	ENSMUST00000036691; ENSMUST00000069817; ENSMUST00000132459; ENSMUST00000123270; ENSMUST00000156313; ENSMUST00000128936; ENSMUST00000142219; ENSMUST00000140015; ENSMUST00000129626; ENSMUST00000141053	Prrc2b	protein_coding	protein_coding	proline-rich coiled-coil 2B [Source:MGI Symbol;Acc:MGI:1923304]	0.5759	2917	GO:0001701; GO:0030154	GO:0003674	GO:0005575	PRRC2B	227723	TRUE	-0.166211	0.00019736	0.0170036	chr2
ENSMUSG00000030691	ENSMUST00000208439; ENSMUST00000032931; ENSMUST00000098250; ENSMUST00000137196; ENSMUST00000145802; ENSMUST00000142727; ENSMUST00000130426; ENSMUST00000208063; ENSMUST00000151693; ENSMUST00000208638; ENSMUST00000208917	Fchsd2	protein_coding	protein_coding	FCH and double SH3 domains 2 [Source:MGI Symbol;Acc:MGI:2448475]	0.42	2263	GO:0015031; GO:0006897; GO:0030833; GO:0030838; GO:0072583; GO:2000601; GO:0007274; GO:0061024	GO:0005515; GO:0008289; GO:0005547; GO:0043325	GO:0005737; GO:0016020; GO:0005886; GO:0070161; GO:0042995; GO:0055037; GO:0005905; GO:0032420; GO:0031594; GO:0120043	FCHSD2	207278	TRUE	-0.180362	0.000198503	0.0170036	chr7
ENSMUSG00000024426	ENSMUST00000061052; ENSMUST00000077494; ENSMUST00000149277; ENSMUST00000143114; ENSMUST00000126744; ENSMUST00000141662; ENSMUST00000056034; ENSMUST00000140292; ENSMUST00000151009; ENSMUST00000137069; ENSMUST00000130309; ENSMUST00000141132; ENSMUST00000140990; ENSMUST00000127959; ENSMUST00000137182; ENSMUST00000174436	Atat1	protein_coding	protein_coding	alpha tubulin acetyltransferase 1 [Source:MGI Symbol;Acc:MGI:1913869]	0.5507	1022	GO:0071929; GO:0007283; GO:0045598; GO:0048666; GO:0006473; GO:0070507; GO:0021542; GO:1900227; GO:0044546	GO:0019799; GO:0016740; GO:0016746; GO:0004468	GO:0005874; GO:0005829; GO:0005737; GO:0016020; GO:0005794; GO:0070161; GO:0005856; GO:0042995; GO:0005925; GO:0030424; GO:0005819; GO:0005905; GO:0072686; GO:0097427	ATAT1	73242	TRUE	0.132427	0.000200355	0.0170618	chr17
ENSMUSG00000027447	ENSMUST00000028938; ENSMUST00000149691; ENSMUST00000144845	Cst3	protein_coding	protein_coding	cystatin C [Source:MGI Symbol;Acc:MGI:102519]	0.5618	664	GO:0008284; GO:0060548; GO:0010466; GO:0006952; GO:0045861; GO:0045740; GO:0006979; GO:0097435; GO:0043067; GO:0060311; GO:2000117; GO:0010951	GO:0004869; GO:0002020; GO:0042802; GO:0030414; GO:0001540; GO:0004866	GO:0005737; GO:0030424; GO:0005886; GO:0005615; GO:0005794; GO:0048471; GO:0005576; GO:0005783; GO:0031965; GO:0043025; GO:0043292; GO:0031982; GO:0005764; GO:0005604; GO:0062023; GO:0042995; GO:0005771	CST3	13010	TRUE	0.242357	0.000206647	0.0174953	chr2
ENSMUSG00000073468	ENSMUST00000154553; ENSMUST00000150728; ENSMUST00000130782; ENSMUST00000135627; ENSMUST00000145276; ENSMUST00000141213; ENSMUST00000153406; ENSMUST00000135964; ENSMUST00000128087	Sft2d1	protein_coding	protein_coding	SFT2 domain containing 1 [Source:MGI Symbol;Acc:MGI:1918689]	0.481	846	GO:0016192; GO:0015031	GO:0003674	GO:0016020; GO:0016021	SFT2D1	106489	TRUE	0.268653	0.000208662	0.0175638	chr17
ENSMUSG00000058690	ENSMUST00000067700; ENSMUST00000090024; ENSMUST00000183007; ENSMUST00000183038; ENSMUST00000183316; ENSMUST00000182797; ENSMUST00000182042; ENSMUST00000182576; ENSMUST00000182558; ENSMUST00000182635	Ccser2	protein_coding	protein_coding	coiled-coil serine rich 2 [Source:MGI Symbol;Acc:MGI:101859]	0.465	2409	GO:0001578	GO:0008017	GO:0005737; GO:0015630; GO:0005856	CCSER2	72972	TRUE	-0.171003	0.000212008	0.0177429	chr14
ENSMUSG00000018322	ENSMUST00000132602; ENSMUST00000018466; ENSMUST00000109384	Tomm34	protein_coding	protein_coding	translocase of outer mitochondrial membrane 34 [Source:MGI Symbol;Acc:MGI:1914395]	0.5288	2105	GO:0006626	GO:0005515; GO:0031072	GO:0005739; GO:0005829; GO:0005737; GO:0016020; GO:0043231; GO:0005741	TOMM34	67145	TRUE	0.178399	0.000213542	0.0177691	chr2
ENSMUSG00000031393	ENSMUST00000100750; ENSMUST00000170481; ENSMUST00000033770; ENSMUST00000123362; ENSMUST00000140399; ENSMUST00000198358	Mecp2	protein_coding	protein_coding	methyl CpG binding protein 2 [Source:MGI Symbol;Acc:MGI:99918]	0.5116	4976	GO:0060291; GO:0010629; GO:0040029; GO:0010628; GO:0045944; GO:0010467; GO:0008284; GO:0009791; GO:0010468; GO:0043524; GO:0000122; GO:0008344; GO:0006357; GO:0016525; GO:0008283; GO:0044030; GO:0030182; GO:0035176; GO:0045893; GO:0008104; GO:0007420; GO:0045892; GO:0007416; GO:0007613; GO:0001662; GO:0008542; GO:0001666; GO:0016358; GO:0031175; GO:0060999; GO:0031507; GO:0032091; GO:0061000; GO:…	GO:0003677; GO:0005515; GO:0003729; GO:0003682; GO:0003700; GO:0019904; GO:0042826; GO:0008327; GO:0003714; GO:0019899; GO:0047485; GO:1990841; GO:0060090; GO:0031490; GO:0003676; GO:0045322; GO:0000400; GO:0140693; GO:0010385; GO:0035197	GO:0005634; GO:0005829; GO:0005737; GO:0000785; GO:0005654; GO:0032991; GO:0098978; GO:0005813; GO:0098794; GO:0000792	MECP2	17257	TRUE	-0.160785	0.000217383	0.017986	chrX
ENSMUSG00000021040	ENSMUST00000161023; ENSMUST00000160488; ENSMUST00000077462; ENSMUST00000160880	Slirp	protein_coding	protein_coding	SRA stem-loop interacting RNA binding protein [Source:MGI Symbol;Acc:MGI:1916394]	0.4463	1050	GO:0007338; GO:0030317; GO:0007286; GO:0070584; GO:0000961	GO:0003723; GO:0003676; GO:0003729	GO:0005739; GO:1990904; GO:0005737; GO:0005634; GO:0048471; GO:0036126; GO:0001669	SLIRP	380773	TRUE	0.255518	0.000224445	0.0184584	chr12
ENSMUSG00000033671	ENSMUST00000138762; ENSMUST00000132189; ENSMUST00000129865; ENSMUST00000146987; ENSMUST00000124495; ENSMUST00000192899	Cep350	protein_coding	protein_coding	centrosomal protein 350 [Source:MGI Symbol;Acc:MGI:1921331]	0.4487	3470	GO:0034453; GO:0071539; GO:1905515	GO:0008017; GO:0005515	GO:0005634; GO:0005737; GO:0005815; GO:0005856; GO:0042995; GO:0005813; GO:0005819; GO:0005814	CEP350	74081	TRUE	-0.260555	0.000225628	0.0184584	chr1
ENSMUSG00000030213	ENSMUST00000203988; ENSMUST00000032335; ENSMUST00000185724; ENSMUST00000186577; ENSMUST00000185936; ENSMUST00000187429; ENSMUST00000186742; ENSMUST00000189535; ENSMUST00000195743; ENSMUST00000203178; ENSMUST00000188805; ENSMUST00000185332	Atf7ip	protein_coding	protein_coding	activating transcription factor 7 interacting protein [Source:MGI Symbol;Acc:MGI:1858965]	0.4598	2561	GO:0000122; GO:0006306; GO:0006355; GO:0006354; GO:0045893; GO:0045892; GO:0050821; GO:0031647; GO:0090309; GO:0045898	GO:0005515; GO:0003712; GO:0003714; GO:0016887	GO:0005634; GO:0005829; GO:0016604; GO:0005654; GO:0005667	ATF7IP	54343	TRUE	-0.141795	0.000228565	0.0185942	chr6
ENSMUSG00000031538	ENSMUST00000210960; ENSMUST00000033941; ENSMUST00000211033	Plat	protein_coding	protein_coding	plasminogen activator, tissue [Source:MGI Symbol;Acc:MGI:97610]	0.4914	2393	GO:0006508; GO:0048008; GO:0035249; GO:0014909; GO:0001666; GO:0045861; GO:0031639; GO:0060468; GO:0010757; GO:0051918; GO:0060279; GO:0042060; GO:0048167; GO:0051591; GO:0070542; GO:0071372; GO:0071373; GO:0071549; GO:0099183	GO:0004252; GO:0016787; GO:0008233; GO:0008236; GO:0005102; GO:0051219	GO:0005576; GO:0045202; GO:0005737; GO:0005615; GO:0110165; GO:0009986; GO:0045177; GO:0098978; GO:0030141; GO:0097180; GO:0098794; GO:0098685; GO:0098992; GO:0099544	PLAT	18791	TRUE	0.219707	0.000232117	0.0186461	chr8
ENSMUSG00000021936	ENSMUST00000111945; ENSMUST00000022504; ENSMUST00000111944; ENSMUST00000111943; ENSMUST00000150659; ENSMUST00000111942; ENSMUST00000127143; ENSMUST00000227306; ENSMUST00000130539; ENSMUST00000226798; ENSMUST00000132379	Mapk8	protein_coding	protein_coding	mitogen-activated protein kinase 8 [Source:MGI Symbol;Acc:MGI:1346861]	0.4086	1986	GO:0006468; GO:0071222; GO:0043066; GO:0010628; GO:0010468; GO:0006954; GO:0045664; GO:0001503; GO:0016310; GO:0043525; GO:0035556; GO:0009408; GO:0048511; GO:0006970; GO:0000165; GO:0006355; GO:0007165; GO:0034614; GO:0071276; GO:0046605; GO:0010666; GO:0031175; GO:0002052; GO:0034198; GO:0032091; GO:0007254; GO:0051403; GO:0034599; GO:0070301; GO:0031398; GO:0043065; GO:0032880; GO:0071732; GO:…	GO:0005524; GO:0004672; GO:0004707; GO:0005515; GO:0016740; GO:0000166; GO:0016301; GO:0004674; GO:0019894; GO:0106310; GO:0042826; GO:0019903; GO:0019899; GO:0004712; GO:0035033; GO:0120283; GO:0004705	GO:0005739; GO:0005634; GO:0045202; GO:0005829; GO:0005737; GO:0030424; GO:0043005; GO:0043231; GO:0043204; GO:0031982; GO:0032839; GO:0002102; GO:0097441	MAPK8	26419	TRUE	-0.260665	0.000232586	0.0186461	chr14
ENSMUSG00000031095	ENSMUST00000016681; ENSMUST00000115118; ENSMUST00000147129; ENSMUST00000050083	Cul4b	protein_coding	protein_coding	cullin 4B [Source:MGI Symbol;Acc:MGI:1919834]	0.4126	3223	GO:0006511; GO:0016567; GO:0010467; GO:0006281; GO:0006974; GO:0007049; GO:0042254; GO:0031146; GO:0010498; GO:0031175; GO:0034644; GO:0035518; GO:0045732; GO:0048708; GO:0070914; GO:1900087	GO:0031625; GO:0003684; GO:0030674	GO:0031461; GO:0005634; GO:0005829; GO:0005654; GO:0080008; GO:0031464; GO:0031465	CUL4B	72584	TRUE	-0.254451	0.000233045	0.0186461	chrX
ENSMUSG00000002985	ENSMUST00000174064; ENSMUST00000167646; ENSMUST00000173739; ENSMUST00000174355; ENSMUST00000003066; ENSMUST00000172983; ENSMUST00000174144; ENSMUST00000207525; ENSMUST00000172808; ENSMUST00000174710; ENSMUST00000174191	Apoe	protein_coding	protein_coding	apolipoprotein E [Source:MGI Symbol;Acc:MGI:88057]	0.5958	869	GO:0006869; GO:0042157; GO:0010467; GO:0042632; GO:0010468; GO:0043524; GO:0010976; GO:0006629; GO:0006641; GO:0010977; GO:0007568; GO:0098869; GO:0007186; GO:0120009; GO:0045893; GO:0070374; GO:0043254; GO:0008203; GO:0042981; GO:0006874; GO:0030195; GO:0090090; GO:0031175; GO:0060999; GO:1902952; GO:0006898; GO:0061000; GO:0048844; GO:0032438; GO:0017038; GO:0045807; GO:0002021; GO:0055088; GO:…	GO:0008289; GO:0005515; GO:0044877; GO:0008201; GO:0005102; GO:0042802; GO:0042803; GO:0019899; GO:0046983; GO:0001540; GO:0050750; GO:0043395; GO:0005543; GO:0120020; GO:0005319; GO:0048156; GO:0016209; GO:0060228; GO:0046848; GO:0046911; GO:0070326; GO:0071813	GO:0005576; GO:0045202; GO:0005737; GO:0005886; GO:0005615; GO:0005794; GO:0009986; GO:0005783; GO:0031012; GO:0043025; GO:0005768; GO:0005635; GO:0030425; GO:0098978; GO:0005769; GO:0005770; GO:0034364; GO:0034361; GO:0005764; GO:0005829; GO:0005874; GO:0034362; GO:0034363; GO:0042627; GO:0043083; GO:0031232; GO:0034365; GO:0042470; GO:0070062; GO:0097487; GO:1990777	APOE	11816	TRUE	0.251408	0.000239298	0.0190232	chr7
ENSMUSG00000031502	ENSMUST00000033898; ENSMUST00000209735; ENSMUST00000209598; ENSMUST00000130488; ENSMUST00000209661; ENSMUST00000208386; ENSMUST00000208095; ENSMUST00000209000	Col4a1	protein_coding	protein_coding	collagen, type IV, alpha 1 [Source:MGI Symbol;Acc:MGI:88454]	0.5561	2141	GO:0071230; GO:0007420; GO:0001525; GO:0030198; GO:0048514; GO:0007528; GO:0038063; GO:0001569; GO:0030855; GO:0061304; GO:0061333; GO:0071711	GO:0005201; GO:0030020; GO:0048407	GO:0005581; GO:0005615; GO:0110165; GO:0005576; GO:0005604; GO:0031012; GO:0062023; GO:0005587; GO:0016020	COL4A1	12826	TRUE	0.425074	0.000241434	0.0190232	chr8
ENSMUSG00000027994	ENSMUST00000029624; ENSMUST00000153506; ENSMUST00000146340; ENSMUST00000122961	Mcub	protein_coding	protein_coding	mitochondrial calcium uniporter dominant negative beta subunit [Source:MGI Symbol;Acc:MGI:1914065]	0.5242	783	GO:0006811; GO:0006816; GO:0051560; GO:0006851; GO:0036444	GO:0005515; GO:0019855	GO:0005739; GO:0005654; GO:0016020; GO:0016021; GO:0043231; GO:0005743; GO:0031224; GO:0034704; GO:0031305; GO:1990246	MCUB	66815	TRUE	-0.528842	0.000241676	0.0190232	chr3
ENSMUSG00000025261	ENSMUST00000129714; ENSMUST00000139386; ENSMUST00000152757; ENSMUST00000153687; ENSMUST00000149344; ENSMUST00000137816; ENSMUST00000026292; ENSMUST00000131786; ENSMUST00000130243; ENSMUST00000156616; ENSMUST00000138566; ENSMUST00000147666; ENSMUST00000150020; ENSMUST00000112622; ENSMUST00000239245; ENSMUST00000138023; ENSMUST00000123306; ENSMUST00000150882; ENSMUST00000150426; ENSMUST00000132453;…	Huwe1	protein_coding	protein_coding	HECT, UBA and WWE domain containing 1 [Source:MGI Symbol;Acc:MGI:1926884]	0.4633	2621	GO:0006281; GO:0006974; GO:0016567; GO:0000209; GO:0006284; GO:0006513; GO:0010637; GO:0016574; GO:0031398; GO:0032922; GO:0098779; GO:0030154; GO:0043161; GO:0048511; GO:0007030; GO:0061025	GO:0004842; GO:0016740; GO:0061630; GO:0003677	GO:0005634; GO:0005654; GO:0005737; GO:0005829; GO:0005739; GO:0000139	HUWE1	59026	TRUE	-0.167226	0.00024537	0.0191866	chrX
ENSMUSG00000034154	ENSMUST00000049920; ENSMUST00000110808; ENSMUST00000138707	Ino80	protein_coding	protein_coding	INO80 complex subunit [Source:MGI Symbol;Acc:MGI:1915392]	0.4422	3563	GO:0045944; GO:0030307; GO:0051726; GO:0006281; GO:0006974; GO:0007049; GO:0051301; GO:0045893; GO:0006351; GO:0006310; GO:0006338; GO:0006275; GO:0033044; GO:0060382; GO:0000723; GO:0006282; GO:0045739; GO:0045995; GO:1904507; GO:0070914; GO:2000045; GO:0006302; GO:0051225; GO:0000724; GO:0034644; GO:0071479; GO:0000070; GO:0010571; GO:0043618	GO:0003677; GO:0005524; GO:0140658; GO:0016787; GO:0000166; GO:0016887; GO:0042393; GO:0003779; GO:0008094; GO:0043014	GO:0005634; GO:0005829; GO:0016604; GO:0005654; GO:0005737; GO:0005694; GO:0031011; GO:0005856; GO:0005874; GO:0005819	INO80	68142	TRUE	-0.201157	0.000247964	0.0191866	chr2
ENSMUSG00000038056	ENSMUST00000174734; ENSMUST00000172556; ENSMUST00000045291; ENSMUST00000172707; ENSMUST00000173673; ENSMUST00000173073; ENSMUST00000173174; ENSMUST00000172626	Kmt2c	protein_coding	protein_coding	lysine (K)-specific methyltransferase 2C [Source:MGI Symbol;Acc:MGI:2444959]	0.4677	5232	GO:0032259; GO:0006325; GO:0016571; GO:0006355; GO:0010468; GO:0097692; GO:0016570	GO:0005515; GO:0016740; GO:0046872; GO:0008168; GO:0042800; GO:0042054	GO:0005634; GO:0044666; GO:0005654; GO:0035097	KMT2C	231051	TRUE	-0.255611	0.000250089	0.0191866	chr5
ENSMUSG00000031278	ENSMUST00000112907; ENSMUST00000112904; ENSMUST00000112903; ENSMUST00000033634; ENSMUST00000140520	Acsl4	protein_coding	protein_coding	acyl-CoA synthetase long-chain family member 4 [Source:MGI Symbol;Acc:MGI:1354713]	0.4005	4125	GO:0030307; GO:0006629; GO:0001676; GO:0044238; GO:0071704; GO:0006631; GO:0030182; GO:0032024; GO:0044281; GO:0060996; GO:0015908; GO:0060136; GO:0019432; GO:0008610; GO:0019217; GO:0035338; GO:0032307; GO:0035336	GO:0000166; GO:0005524; GO:0016874; GO:0004467; GO:0031957; GO:0047676	GO:0005739; GO:0005737; GO:0016020; GO:0016021; GO:0005886; GO:0005783; GO:0005789; GO:0043231; GO:0043025; GO:0005741; GO:0005777; GO:0005811; GO:0005778; GO:0031966; GO:0044233	ACSL4	50790	TRUE	-0.343793	0.000251279	0.0191866	chrX
ENSMUSG00000034297	ENSMUST00000043624; ENSMUST00000136622; ENSMUST00000140514; ENSMUST00000144983	Med13	protein_coding	protein_coding	mediator complex subunit 13 [Source:MGI Symbol;Acc:MGI:3029632]	0.4121	3076	GO:0006357; GO:0045944; GO:0006354; GO:0045893; GO:0060261; GO:0043433; GO:0042632; GO:0070328	GO:0003712; GO:0003713; GO:0046966	GO:0016592; GO:0005634; GO:0005654	MED13	327987	TRUE	-0.246775	0.000251768	0.0191866	chr11
ENSMUSG00000040452	ENSMUST00000226407; ENSMUST00000227496; ENSMUST00000075132	Cdh12	protein_coding	protein_coding	cadherin 12 [Source:MGI Symbol;Acc:MGI:109503]	0.4148	4015	GO:0007156; GO:0007155; GO:0098609; GO:0000902; GO:0098742; GO:0007043; GO:0016339; GO:0034332	GO:0005509; GO:0046872; GO:0045296	GO:0016020; GO:0005886; GO:0016021; GO:0005912; GO:0016342	CDH12	215654	TRUE	-0.376976	0.000252917	0.0191866	chr15
ENSMUSG00000031503	ENSMUST00000033899; ENSMUST00000145295; ENSMUST00000146219	Col4a2	protein_coding	protein_coding	collagen, type IV, alpha 2 [Source:MGI Symbol;Acc:MGI:88455]	0.605	2712	GO:0016525; GO:0001525; GO:0030198; GO:0006351; GO:0038063; GO:0007568; GO:0014823; GO:0035987; GO:0071560	GO:0005201; GO:0030020	GO:0005581; GO:0016020; GO:0005615; GO:0110165; GO:0005576; GO:0005604; GO:0031012; GO:0062023; GO:0005587	COL4A2	12827	TRUE	0.327502	0.000252976	0.0191866	chr8
ENSMUSG00000051550	ENSMUST00000159754; ENSMUST00000162731; ENSMUST00000160225; ENSMUST00000108572; ENSMUST00000162502; ENSMUST00000160808	Zfp579	protein_coding	protein_coding	zinc finger protein 579 [Source:MGI Symbol;Acc:MGI:1915740]	0.6012	1370	GO:0006357	GO:0000976; GO:0003677; GO:0046872; GO:0000981	GO:0005634	ZNF579	68490	TRUE	0.271092	0.000256385	0.0193444	chr7
ENSMUSG00000021660	ENSMUST00000022163; ENSMUST00000152704; ENSMUST00000133461; ENSMUST00000134542; ENSMUST00000133826	Btf3	protein_coding	protein_coding	basic transcription factor 3 [Source:MGI Symbol;Acc:MGI:1202875]	0.4655	833	GO:0001701; GO:0015031; GO:1905551		GO:0005829; GO:0005737; GO:0005634; GO:0005854; GO:0042788	BTF3	218490	TRUE	0.126369	0.00025861	0.0194088	chr13
ENSMUSG00000031775	ENSMUST00000034227; ENSMUST00000212555; ENSMUST00000213043	Pllp	protein_coding	protein_coding	plasma membrane proteolipid [Source:MGI Symbol;Acc:MGI:1915051]	0.5506	1166	GO:0006811; GO:0042552; GO:0009611	GO:0019911	GO:0016020; GO:0016021; GO:0110165; GO:0045121; GO:0043218	PLLP	67801	TRUE	0.288114	0.000259903	0.0194088	chr8
ENSMUSG00000042724	ENSMUST00000035987; ENSMUST00000222322; ENSMUST00000223292	Map3k9	protein_coding	protein_coding	mitogen-activated protein kinase kinase kinase 9 [Source:MGI Symbol;Acc:MGI:2449952]	0.5755	3698	GO:0006468; GO:0016310; GO:0006915; GO:0000165; GO:0043065; GO:0008219; GO:0046777	GO:0005515; GO:0005524; GO:0004672; GO:0016740; GO:0000166; GO:0016301; GO:0004674; GO:0004709; GO:0106310; GO:0004706		MAP3K9	338372	TRUE	-0.336411	0.000265026	0.0196024	chr12
ENSMUSG00000022307	ENSMUST00000090096; ENSMUST00000110297; ENSMUST00000179393; ENSMUST00000230203; ENSMUST00000229769; ENSMUST00000229511; ENSMUST00000229836; ENSMUST00000170127; ENSMUST00000230778; ENSMUST00000022918; ENSMUST00000090095; ENSMUST00000166917; ENSMUST00000230127; ENSMUST00000230131; ENSMUST00000231215; ENSMUST00000230126	Oxr1	protein_coding	protein_coding	oxidation resistance 1 [Source:MGI Symbol;Acc:MGI:2179326]	0.4468	2437	GO:0043524; GO:0051402; GO:0006979; GO:1903204; GO:0007628; GO:0071447; GO:1902083; GO:1900408	GO:0016491	GO:0005739; GO:0005730; GO:0005634	OXR1	170719	TRUE	-0.270267	0.000265188	0.0196024	chr15
ENSMUSG00000000149	ENSMUST00000000153; ENSMUST00000198447	Gna12	protein_coding	protein_coding	guanine nucleotide binding protein, alpha 12 [Source:MGI Symbol;Acc:MGI:95767]	0.5764	2361	GO:0007186; GO:0001701; GO:0008217; GO:0010259; GO:0007165; GO:0035556; GO:0007266; GO:0008360; GO:0010762; GO:0030154; GO:0007188; GO:0042733; GO:0032006; GO:1904706; GO:0032434; GO:0032516; GO:1904753; GO:0009410	GO:0003924; GO:0019001; GO:0031683; GO:0046872; GO:0000166; GO:0005525; GO:0001664; GO:0051721; GO:0019888; GO:0031752	GO:0005737; GO:0016020; GO:0005886; GO:0016328; GO:0043005; GO:0043025; GO:0005834; GO:0031526	GNA12	14673	TRUE	0.206857	0.000269312	0.0197702	chr5
ENSMUSG00000013523	ENSMUST00000154650; ENSMUST00000109152; ENSMUST00000068137; ENSMUST00000013667; ENSMUST00000156657; ENSMUST00000133673; ENSMUST00000152461; ENSMUST00000147577; ENSMUST00000145920	Bcas1	protein_coding	protein_coding	brain enriched myelin associated protein 1 [Source:MGI Symbol;Acc:MGI:1924210]	0.5245	1552	GO:0042552	GO:0042803	GO:0014069; GO:0005829; GO:0005737	BCAS1	76960	TRUE	0.29099	0.000270174	0.0197702	chr2
ENSMUSG00000073889	ENSMUST00000108041; ENSMUST00000098132; ENSMUST00000108040; ENSMUST00000146608; ENSMUST00000140894; ENSMUST00000108042; ENSMUST00000145445; ENSMUST00000155538; ENSMUST00000152748; ENSMUST00000142059	Il11ra1	protein_coding	protein_coding	interleukin 11 receptor, alpha chain 1 [Source:MGI Symbol;Acc:MGI:107426]	0.5702	1306	GO:0008284; GO:0007566; GO:0008283; GO:0019221; GO:0032502; GO:0060135; GO:0001890; GO:0001779; GO:0046697; GO:0060322; GO:0038154	GO:0005515; GO:0004896; GO:0019955; GO:0004921; GO:0019970	GO:0016020; GO:0016021; GO:0009897; GO:0005576; GO:0043235	IL11RA	16157	TRUE	0.299329	0.000275162	0.0199049	chr4
ENSMUSG00000063077	ENSMUST00000238956; ENSMUST00000060537; ENSMUST00000150853; ENSMUST00000139123; ENSMUST00000055647; ENSMUST00000154411; ENSMUST00000123593; ENSMUST00000133526; ENSMUST00000030806; ENSMUST00000140749; ENSMUST00000150230; ENSMUST00000132072	Kif1b	protein_coding	protein_coding	kinesin family member 1B [Source:MGI Symbol;Acc:MGI:108426]	0.4969	3885	GO:0007018; GO:0010628; GO:0009792; GO:0016192; GO:0030705; GO:1990048; GO:1990049; GO:0008089; GO:0032418; GO:0047497; GO:0007270; GO:0007274; GO:0010970; GO:1990778	GO:0005515; GO:0005524; GO:0003777; GO:0008017; GO:0000166; GO:0003774; GO:0016887; GO:0019900; GO:0008574; GO:0097110	GO:0005737; GO:0030424; GO:0005739; GO:0031410; GO:0045202; GO:0030659; GO:0005856; GO:0042995; GO:0016020; GO:0043005; GO:0008021; GO:0005874; GO:0030425; GO:0005871; GO:1904115; GO:0005875	KIF1B	16561	TRUE	-0.166645	0.000276521	0.0199049	chr4
ENSMUSG00000027346	ENSMUST00000127712; ENSMUST00000148833; ENSMUST00000110136; ENSMUST00000060955; ENSMUST00000149854; ENSMUST00000145694; ENSMUST00000110142; ENSMUST00000028822; ENSMUST00000124632; ENSMUST00000124107; ENSMUST00000110135; ENSMUST00000140867; ENSMUST00000131617	Gpcpd1	protein_coding	protein_coding	glycerophosphocholine phosphodiesterase 1 [Source:MGI Symbol;Acc:MGI:104898]	0.4254	2444	GO:0006629; GO:0007519; GO:0046475	GO:0030246; GO:2001070; GO:0008081; GO:0016787; GO:0047389; GO:0008889	GO:0005737; GO:0005829	GPCPD1	74182	TRUE	-0.26928	0.000277141	0.0199049	chr2
ENSMUSG00000064302	ENSMUST00000049404; ENSMUST00000178710; ENSMUST00000070989; ENSMUST00000190571; ENSMUST00000189676; ENSMUST00000190733; ENSMUST00000189738; ENSMUST00000187713; ENSMUST00000165223; ENSMUST00000189570; ENSMUST00000190135; ENSMUST00000191445; ENSMUST00000189262; ENSMUST00000186349; ENSMUST00000185405; ENSMUST00000188710; ENSMUST00000203009; ENSMUST00000203646; ENSMUST00000204886; ENSMUST00000204552;…	Clasp1	protein_coding	protein_coding	CLIP associating protein 1 [Source:MGI Symbol;Acc:MGI:1923957]	0.4856	4209	GO:0051128	GO:0043515; GO:0051010	GO:0005737; GO:0005794; GO:0000775; GO:0000776; GO:0005694; GO:0005815; GO:0005828; GO:0005881; GO:0043232	CLASP1	76707	TRUE	-0.131527	0.000277481	0.0199049	chr1
ENSMUSG00000041679	ENSMUST00000209964; ENSMUST00000070508; ENSMUST00000210801; ENSMUST00000211199; ENSMUST00000210412	Lrrc29	protein_coding	protein_coding	leucine rich repeat containing 29 [Source:MGI Symbol;Acc:MGI:2443262]	0.5689	2494	GO:0031146	GO:0005515	GO:0019005			TRUE	-1.47579	0.00028191	0.0201234	chr8
ENSMUSG00000037605	ENSMUST00000147226; ENSMUST00000132375; ENSMUST00000149280; ENSMUST00000136104; ENSMUST00000148923; ENSMUST00000140356; ENSMUST00000117253; ENSMUST00000120128; ENSMUST00000121707; ENSMUST00000132634; ENSMUST00000153264; ENSMUST00000127046; ENSMUST00000118078; ENSMUST00000120144; ENSMUST00000120445; ENSMUST00000120673; ENSMUST00000118034; ENSMUST00000118442; ENSMUST00000121641; ENSMUST00000117985;…	Adgrl3	protein_coding	protein_coding	adhesion G protein-coupled receptor L3 [Source:MGI Symbol;Acc:MGI:2441950]	0.4707	3936	GO:0007186; GO:0007166; GO:0007165; GO:0001764; GO:0007189; GO:0007416; GO:0098742; GO:0042220; GO:0007420; GO:0051965; GO:0050808; GO:0031987	GO:0004930; GO:0030246; GO:0004888; GO:0005515; GO:0046872; GO:0005509	GO:0016020; GO:0016021; GO:0005886; GO:0030424; GO:0005887; GO:0070161; GO:0042995; GO:0005911; GO:0098978	ADGRL3	319387	TRUE	-0.209819	0.000286145	0.020326	chr5
ENSMUSG00000052155	ENSMUST00000063886; ENSMUST00000156681	Acvr2a	protein_coding	protein_coding	activin receptor IIA [Source:MGI Symbol;Acc:MGI:102806]	0.4114	3469	GO:0006468; GO:0045944; GO:0007283; GO:0030509; GO:0045669; GO:0016310; GO:0001934; GO:0010033; GO:0009952; GO:0007178; GO:0007368; GO:0010862; GO:0030501; GO:0032924; GO:0032927; GO:0045648; GO:0071773; GO:0048706; GO:0008584; GO:0042475; GO:0060011; GO:0071363; GO:0001702; GO:0046881; GO:0043084; GO:0050999; GO:0007498; GO:0009966; GO:0042713	GO:0005524; GO:0004675; GO:0004672; GO:0016740; GO:0046872; GO:0000166; GO:0016301; GO:0005515; GO:0004674; GO:0015026; GO:0043621; GO:0017002; GO:0048185; GO:0030165; GO:0019838; GO:0098821; GO:0034711	GO:0016020; GO:0005737; GO:0016021; GO:0005886; GO:0009986; GO:0043235; GO:0034673; GO:0048179	ACVR2A	11480	TRUE	-0.257785	0.000295529	0.0208893	chr2
ENSMUSG00000054976	ENSMUST00000137862; ENSMUST00000123720; ENSMUST00000068275; ENSMUST00000113494; ENSMUST00000123285	Nyap2	protein_coding	protein_coding	neuronal tyrosine-phophorylated phosphoinositide 3-kinase adaptor 2 [Source:MGI Symbol;Acc:MGI:2443135]	0.446	4765	GO:0014065; GO:0048812			NYAP2	241134	TRUE	-0.518193	0.000296943	0.0208893	chr1
ENSMUSG00000067274	ENSMUST00000086519; ENSMUST00000156359; ENSMUST00000152976; ENSMUST00000155584	Rplp0	protein_coding	protein_coding	ribosomal protein, large, P0 [Source:MGI Symbol;Acc:MGI:1927636]	0.5787	876	GO:0071353; GO:0042254; GO:0002181; GO:0000027; GO:0007595; GO:0010269; GO:0071320; GO:1904401; GO:1904628	GO:0003735; GO:0042277; GO:0070180	GO:0005634; GO:0045202; GO:1990904; GO:0014069; GO:0005829; GO:0005737; GO:0005840; GO:0016020; GO:0005783; GO:0022625; GO:0030425; GO:0098794; GO:0036464; GO:0022626	RPLP0,RPLP0P6	11837	TRUE	0.148174	0.000303879	0.0212483	chr5
ENSMUSG00000050666	ENSMUST00000053175	Vstm4	protein_coding	protein_coding	V-set and transmembrane domain containing 4 [Source:MGI Symbol;Acc:MGI:2444633]	0.5104	2745	GO:0061298; GO:0043542; GO:0042311; GO:0002040; GO:0001935; GO:0097601	GO:0005515	GO:0016020; GO:0016021; GO:0005886; GO:0005576	VSTM4	320736	TRUE	0.568659	0.000304965	0.0212483	chr14
ENSMUSG00000031529	ENSMUST00000033929; ENSMUST00000209632; ENSMUST00000209904; ENSMUST00000210014; ENSMUST00000210870; ENSMUST00000211065	Tnks	protein_coding	protein_coding	tankyrase, TRF1-interacting ankyrin-related ADP-ribose polymerase [Source:MGI Symbol;Acc:MGI:1341087]	0.4456	3284	GO:0045944; GO:0032212; GO:0015031; GO:0000209; GO:0016055; GO:0007049; GO:0051301; GO:0051225; GO:0051028; GO:0051973; GO:0090263; GO:0018107; GO:0018105; GO:1904355; GO:0070198; GO:1904357; GO:0070212; GO:0070213; GO:0006471; GO:1904908; GO:0031670; GO:1904743	GO:0005515; GO:0003950; GO:0042393; GO:0016740; GO:0016757; GO:0046872; GO:0008270; GO:0016779; GO:1990404	GO:0005829; GO:0016604; GO:0005654; GO:0005634; GO:0005737; GO:0016020; GO:0000139; GO:0005794; GO:0000781; GO:0005694; GO:0005815; GO:0005856; GO:0031965; GO:0005643; GO:0000922; GO:0097431	TNKS	21951	TRUE	-0.178313	0.000306948	0.0212684	chr8
ENSMUSG00000028842	ENSMUST00000132123; ENSMUST00000069097; ENSMUST00000127831; ENSMUST00000151179; ENSMUST00000155645; ENSMUST00000123233	Ago3	protein_coding	protein_coding	argonaute RISC catalytic subunit 3 [Source:MGI Symbol;Acc:MGI:2446634]	0.4465	3106	GO:0031047; GO:0072091; GO:0035278; GO:0006402; GO:0090502; GO:0090305; GO:0006417; GO:0035196; GO:0031054; GO:0010628; GO:1901224; GO:0010501; GO:0070922; GO:0035279	GO:0003676; GO:0005515; GO:0003723; GO:0035198; GO:0046872; GO:0016787; GO:0004518; GO:0003725; GO:0004519; GO:0004521; GO:0003727; GO:0090624	GO:0016442; GO:0070578; GO:0005829; GO:0005737; GO:0005654; GO:1990904; GO:0043232; GO:0000932; GO:0000794; GO:0036464	AGO3	214150	TRUE	-0.260605	0.000308174	0.0212684	chr4
ENSMUSG00000031595	ENSMUST00000143216; ENSMUST00000034004	Pdgfrl	protein_coding	protein_coding	platelet-derived growth factor receptor-like [Source:MGI Symbol;Acc:MGI:1916047]	0.4766	1808			GO:0005576	PDGFRL	68797	TRUE	0.943179	0.000312052	0.0214345	chr8
ENSMUSG00000021549	ENSMUST00000109552; ENSMUST00000223598; ENSMUST00000146792; ENSMUST00000142285; ENSMUST00000148014; ENSMUST00000149799; ENSMUST00000152466; ENSMUST00000141879; ENSMUST00000153231; ENSMUST00000132711	Rasa1	protein_coding	protein_coding	RAS p21 protein activator 1 [Source:MGI Symbol;Acc:MGI:97860]	0.3584	1208	GO:0043087; GO:0043066; GO:0048146; GO:0007165; GO:0050896; GO:0043547; GO:0046580; GO:0001934; GO:0009410; GO:0050731; GO:0001953; GO:0007162; GO:0030833; GO:0036120; GO:0046326; GO:0048514; GO:0071364; GO:0090630	GO:0005515; GO:0044877; GO:0005096; GO:0005102; GO:0019900; GO:0030971; GO:0044325; GO:0001784; GO:0005161; GO:0043422; GO:0051020; GO:1990782	GO:0005829; GO:0005886; GO:0016020; GO:0031965; GO:0001726	RASA1	218397	TRUE	-0.212589	0.000317222	0.0216487	chr13
ENSMUSG00000020859	ENSMUST00000132772; ENSMUST00000132605; ENSMUST00000041956; ENSMUST00000156019; ENSMUST00000132079; ENSMUST00000127066; ENSMUST00000075695; ENSMUST00000092777; ENSMUST00000103168; ENSMUST00000024979; ENSMUST00000138154; ENSMUST00000153076	Spag9	protein_coding	protein_coding	sperm associated antigen 9 [Source:MGI Symbol;Acc:MGI:1918084]	0.4588	4332	GO:0045666; GO:0001933; GO:0051146; GO:0043410; GO:0042147; GO:0045665; GO:0030335; GO:0016192; GO:1903860; GO:0032418	GO:0005515; GO:0042802; GO:0019894; GO:0008432; GO:0005078; GO:0030159	GO:0005829; GO:0005737; GO:0016020; GO:0034451; GO:0005764; GO:0048471; GO:0005765; GO:0016021	SPAG9	70834	TRUE	-0.167963	0.000318145	0.0216487	chr11
ENSMUSG00000022957	ENSMUST00000114001; ENSMUST00000113999; ENSMUST00000064797; ENSMUST00000114002; ENSMUST00000095909; ENSMUST00000056482; ENSMUST00000113996; ENSMUST00000139890; ENSMUST00000131983; ENSMUST00000113993; ENSMUST00000231535; ENSMUST00000231974; ENSMUST00000135057; ENSMUST00000133389; ENSMUST00000124094; ENSMUST00000156841; ENSMUST00000151044; ENSMUST00000144101; ENSMUST00000154967; ENSMUST00000153741;…	Itsn1	protein_coding	protein_coding	intersectin 1 (SH3 domain protein 1A) [Source:MGI Symbol;Acc:MGI:1338069]	0.5185	2291	GO:0035556; GO:0050790; GO:0006897; GO:0008104; GO:0043524; GO:0051402; GO:0051897; GO:0015031; GO:0006887; GO:0016197; GO:0060999; GO:1905274; GO:0007264; GO:0033674; GO:0048488; GO:0060124; GO:2001288; GO:0150007	GO:0005515; GO:0005509; GO:0046872; GO:0005085; GO:0060090; GO:0070064; GO:0019209	GO:0110165; GO:0045202; GO:0070161; GO:0042995; GO:0005886; GO:0005905; GO:0005737; GO:0005634; GO:0016020; GO:0031410; GO:0030027; GO:0043005; GO:0012505; GO:0043025; GO:0005768; GO:0055037; GO:0005635; GO:0098978; GO:0030139; GO:0043197; GO:0005829; GO:0098871; GO:0097440; GO:0097708; GO:0044305; GO:0098833	ITSN1	16443	TRUE	-0.157323	0.000323254	0.021894	chr16
ENSMUSG00000044098	ENSMUST00000051139; ENSMUST00000068879; ENSMUST00000151927; ENSMUST00000185731	Rsbn1	protein_coding	protein_coding	rosbin, round spermatid basic protein 1 [Source:MGI Symbol;Acc:MGI:2444993]	0.4378	3952	GO:0008150; GO:0006325	GO:0005515; GO:0046872; GO:0016491; GO:0051213; GO:0035575	GO:0005634	RSBN1	229675	TRUE	-0.258611	0.000331674	0.0223604	chr3
ENSMUSG00000062232	ENSMUST00000118100; ENSMUST00000118340; ENSMUST00000195708; ENSMUST00000152275; ENSMUST00000124647; ENSMUST00000136126	Rapgef2	protein_coding	protein_coding	Rap guanine nucleotide exchange factor (GEF) 2 [Source:MGI Symbol;Acc:MGI:2659071]	0.4606	4643	GO:0007165; GO:0007264; GO:0090557; GO:0010976; GO:0008285; GO:0071320; GO:0007399; GO:0007186; GO:0001764; GO:0030154; GO:0043547; GO:0042127; GO:0007265; GO:0045860; GO:0070374; GO:0031547; GO:0007218; GO:0030033; GO:0072659; GO:0038180; GO:1990090; GO:0032486; GO:0061028; GO:1901888; GO:0031175; GO:0032092; GO:2000481; GO:0048167; GO:2001224; GO:0019933; GO:0043950; GO:0071321; GO:0001568; GO:…	GO:0005515; GO:0005085; GO:0005096; GO:0030552; GO:0019901; GO:0070300; GO:0030165; GO:0050699; GO:0031697	GO:0045202; GO:0005829; GO:0005737; GO:0016020; GO:0005886; GO:0032991; GO:0048471; GO:0070161; GO:0016324; GO:0043005; GO:0043025; GO:0005768; GO:0005770; GO:0005911; GO:0005923; GO:0030139	RAPGEF2	76089	TRUE	-0.179464	0.000334007	0.0224139	chr3
ENSMUSG00000019852	ENSMUST00000215836; ENSMUST00000019999	Arfgef3	protein_coding	protein_coding	ARFGEF family member 3 [Source:MGI Symbol;Acc:MGI:106387]	0.4988	10090	GO:0050790; GO:0030036; GO:0032012	GO:0005085	GO:0016020; GO:0016021; GO:0005794; GO:0031410; GO:0030658; GO:0030133	ARFGEF3	215821	TRUE	-0.27787	0.000343267	0.0229032	chr10
ENSMUSG00000024293	ENSMUST00000025142; ENSMUST00000127099; ENSMUST00000097670; ENSMUST00000115864; ENSMUST00000145320; ENSMUST00000234347; ENSMUST00000234090; ENSMUST00000234550; ENSMUST00000234151	Esco1	protein_coding	protein_coding	establishment of sister chromatid cohesion N-acetyltransferase 1 [Source:MGI Symbol;Acc:MGI:1925055]	0.4088	2055	GO:0007049; GO:0006275; GO:0007062; GO:0034421; GO:0018394; GO:0007064	GO:0016740; GO:0046872; GO:0016746; GO:0008270; GO:0042802; GO:0016407; GO:0061733; GO:0008080	GO:0000785; GO:0005634; GO:0005694	ESCO1	77805	TRUE	-0.322849	0.000344974	0.0229032	chr18
ENSMUSG00000020954	ENSMUST00000013130; ENSMUST00000169503; ENSMUST00000218212	Strn3	protein_coding	protein_coding	striatin, calmodulin binding protein 3 [Source:MGI Symbol;Acc:MGI:2151064]	0.4344	3179	GO:0045944; GO:0000122; GO:0045892; GO:0032355; GO:0033147	GO:0005515; GO:0044877; GO:0005516; GO:0031267; GO:0051721; GO:0070016	GO:0005634; GO:0005737; GO:0005654; GO:0016020; GO:0005886; GO:0005794; GO:0032991; GO:0043025; GO:0030425; GO:0090443	STRN3	94186	TRUE	-0.186867	0.000346094	0.0229032	chr12
ENSMUSG00000034973	ENSMUST00000190957; ENSMUST00000186290; ENSMUST00000190906; ENSMUST00000187607; ENSMUST00000188675; ENSMUST00000185919; ENSMUST00000034987; ENSMUST00000190407; ENSMUST00000186841; ENSMUST00000190834; ENSMUST00000185840; ENSMUST00000186418; ENSMUST00000185297; ENSMUST00000187348; ENSMUST00000189564; ENSMUST00000189817; ENSMUST00000186715; ENSMUST00000187427	Dop1a	protein_coding	protein_coding	DOP1 leucine zipper like protein A [Source:MGI Symbol;Acc:MGI:1289294]	0.427	3115	GO:0015031; GO:0006895		GO:0005829	DOP1A	320615	TRUE	-0.195882	0.000347591	0.0229032	chr9
ENSMUSG00000049583	ENSMUST00000208791; ENSMUST00000208878; ENSMUST00000125009; ENSMUST00000208776; ENSMUST00000155358; ENSMUST00000107263; ENSMUST00000138732	Grm5	protein_coding	protein_coding	glutamate receptor, metabotropic 5 [Source:MGI Symbol;Acc:MGI:1351342]	0.4793	2950	GO:0007186; GO:0007165; GO:0007268; GO:0007200; GO:0007216; GO:0006468; GO:0007626; GO:0060078; GO:0001932; GO:0043410; GO:0006355; GO:0050890; GO:1904646; GO:0007196; GO:0002029; GO:0006448; GO:0007205; GO:0035584; GO:0040013; GO:0048170; GO:0061098; GO:0099553; GO:1902938; GO:0007611; GO:0051966; GO:0048169; GO:0099566; GO:0007612; GO:0050808; GO:0099170; GO:0007206	GO:0004930; GO:0005515; GO:0042802; GO:1990782; GO:0008066; GO:0031687; GO:0099583; GO:0001640; GO:0001639; GO:0099530	GO:0016021; GO:0045202; GO:0016020; GO:0005886; GO:0014069; GO:0005737; GO:0005887; GO:0043198; GO:0098978; GO:0043197; GO:0099055; GO:0098839; GO:0098685; GO:0097449; GO:0043005	GRM5	108071	TRUE	-0.357199	0.000350701	0.0230041	chr7
ENSMUSG00000087679	ENSMUST00000133808; ENSMUST00000163836	Tmem250-ps	protein_coding	protein_coding	transmembrane protein 250, pseudogene [Source:MGI Symbol;Acc:MGI:1924939]	0.5967	1452	GO:0008284; GO:0048524	GO:0003674	GO:0005634; GO:0005737; GO:0005654; GO:0016020; GO:0016021	TMEM250	109299	TRUE	0.213137	0.000356071	0.0231553	chr2
ENSMUSG00000049422	ENSMUST00000219839; ENSMUST00000058906; ENSMUST00000219435	Chchd10	protein_coding	protein_coding	coiled-coil-helix-coiled-coil-helix domain containing 10 [Source:MGI Symbol;Acc:MGI:2143558]	0.5829	944	GO:0007005; GO:0065003; GO:1901030; GO:0006119; GO:0031930; GO:1903109; GO:0030322; GO:0051457; GO:0090144; GO:0099558; GO:1903852	GO:0005515	GO:0005739; GO:0005634; GO:0005758; GO:0061617	CHCHD10	103172	TRUE	0.224905	0.000356187	0.0231553	chr10
ENSMUSG00000121513	ENSMUST00000248537; ENSMUST00000248712; ENSMUST00000248713; ENSMUST00000248714; ENSMUST00000248715; ENSMUST00000248716; ENSMUST00000248717; ENSMUST00000248718	ENSMUSG00000121513	protein_coding	protein_coding	protein tyrosine phosphatase, receptor type, G [Source:NCBI gene (formerly Entrezgene);Acc:19270]	0.4893	2755	GO:0006470; GO:0016311; GO:0010633; GO:0007420; GO:0010977	GO:0005515; GO:0016791; GO:0004725; GO:0042802	GO:0005615			TRUE	-0.189634	0.00035896	0.0232319	chr14
ENSMUSG00000040021	ENSMUST00000165952; ENSMUST00000217931; ENSMUST00000040043	Lats1	protein_coding	protein_coding	large tumor suppressor [Source:MGI Symbol;Acc:MGI:1333883]	0.442	5183	GO:0006468; GO:0060644; GO:0016310; GO:0000278; GO:0007049; GO:0035556; GO:0051301; GO:0018105; GO:0008104; GO:0035329; GO:0033138; GO:0043254; GO:0030833; GO:0045736; GO:0090090; GO:0043065; GO:0030216; GO:0001827; GO:0000082; GO:0046620; GO:2000058; GO:0000086; GO:0017015; GO:0033146; GO:1900181; GO:0051220; GO:0009755; GO:0001828; GO:0000819	GO:0005524; GO:0004672; GO:0004674; GO:0016740; GO:0046872; GO:0000166; GO:0016301; GO:0005515; GO:0000287; GO:0106310; GO:0019901; GO:0030331	GO:0005737; GO:0005815; GO:0005856; GO:0005819; GO:0030496; GO:0000922	LATS1	16798	TRUE	-0.184452	0.000368977	0.0237745	chr10
ENSMUSG00000039585	ENSMUST00000136740; ENSMUST00000135298; ENSMUST00000128341; ENSMUST00000147364; ENSMUST00000151167; ENSMUST00000130497; ENSMUST00000127933; ENSMUST00000126631	Myo9a	protein_coding	protein_coding	myosin IXa [Source:MGI Symbol;Acc:MGI:107735]	0.4036	4923	GO:0007165; GO:0035556; GO:0043547; GO:0034329; GO:0045198; GO:0150011	GO:0005515; GO:0005524; GO:0003774; GO:0046872; GO:0000166; GO:0005096; GO:0003779; GO:0051015; GO:0000146	GO:0016459; GO:0005737; GO:0016020; GO:0016021; GO:0045202; GO:0030426; GO:0042995; GO:0120025; GO:0005884; GO:0044295	MYO9A	270163	TRUE	-0.218864	0.0003721	0.0238701	chr9
ENSMUSG00000049470	ENSMUST00000060945; ENSMUST00000153821; ENSMUST00000139054; ENSMUST00000136470; ENSMUST00000152616; ENSMUST00000130152; ENSMUST00000154499; ENSMUST00000129019	Aff4	protein_coding	protein_coding	AF4/FMR2 family, member 4 [Source:MGI Symbol;Acc:MGI:2136171]	0.4394	2188	GO:0010468; GO:0007286	GO:0005515	GO:0005634; GO:0005654; GO:0001650; GO:0008023; GO:0032783; GO:0000791	AFF4	93736	TRUE	-0.183601	0.000376411	0.023951	chr11
ENSMUSG00000033237	ENSMUST00000134985; ENSMUST00000096250; ENSMUST00000175735; ENSMUST00000176739	Arid2	protein_coding	protein_coding	AT rich interactive domain 2 (ARID, RFX-like) [Source:MGI Symbol;Acc:MGI:1924294]	0.4398	3414	GO:0006355; GO:0045944; GO:0008285; GO:0003007; GO:0048568; GO:0060038; GO:0006325; GO:0006338; GO:0030336; GO:0006337; GO:0006357; GO:0030071; GO:0045582; GO:0045597; GO:0045663; GO:0070316; GO:2000045; GO:2000781; GO:2000819; GO:0042592; GO:0060982; GO:0072359; GO:1905168	GO:0003677; GO:0046872	GO:0005634; GO:0005654; GO:0005886; GO:0044815; GO:0070603; GO:0005667; GO:0000785; GO:0016514; GO:0000776; GO:0016363; GO:0016586	ARID2	77044	TRUE	-0.216172	0.00037665	0.023951	chr15
ENSMUSG00000025246	ENSMUST00000088217; ENSMUST00000133893	Tbl1x	protein_coding	protein_coding	transducin (beta)-like 1 X-linked [Source:MGI Symbol;Acc:MGI:1336172]	0.456	4422	GO:0006357; GO:0043627; GO:0043161; GO:0016575; GO:0045892; GO:0045944; GO:0045444; GO:0050821; GO:0048545	GO:0005515; GO:0003682; GO:0000976; GO:0042393; GO:0003677; GO:0042802; GO:0003714; GO:0019904; GO:0008022; GO:0140297; GO:0008013	GO:0005634; GO:0005654; GO:0000118; GO:0072686; GO:0005667; GO:0017053	TBL1X,TBL1Y	21372	TRUE	-0.185587	0.000380164	0.0240289	chrX
ENSMUSG00000029440	ENSMUST00000199260; ENSMUST00000133386; ENSMUST00000100729; ENSMUST00000196137; ENSMUST00000200560; ENSMUST00000197809; ENSMUST00000198183	Psmd9	protein_coding	protein_coding	proteasome (prosome, macropain) 26S subunit, non-ATPase, 9 [Source:MGI Symbol;Acc:MGI:1914401]	0.5146	1344	GO:0045944; GO:0045893; GO:0070682; GO:0046676; GO:0097050; GO:0032024	GO:0008022; GO:0003713; GO:0003674; GO:0043425	GO:0005634; GO:0005737; GO:0008540	PSMD9	67151	TRUE	0.197261	0.000381176	0.0240289	chr5
ENSMUSG00000020101	ENSMUST00000020301; ENSMUST00000105460; ENSMUST00000164027; ENSMUST00000169621; ENSMUST00000169139; ENSMUST00000170507; ENSMUST00000105459	Vsir	protein_coding	protein_coding	V-set immunoregulatory receptor [Source:MGI Symbol;Acc:MGI:1921298]	0.5783	1839	GO:0050776; GO:0010628; GO:0010950; GO:0030335; GO:0031638; GO:0032689; GO:0032693; GO:0032700; GO:0032720; GO:0045591; GO:0120158; GO:2000562; GO:2000565; GO:0030509; GO:2000738; GO:0048863; GO:0030513; GO:0002725; GO:0046636	GO:0019899; GO:0042802; GO:0061133; GO:0005515	GO:0016020; GO:0016021; GO:0005886; GO:0009897	VSIR	74048	TRUE	0.177785	0.00038378	0.0240888	chr10
ENSMUSG00000040738	ENSMUST00000044616; ENSMUST00000136545; ENSMUST00000137054; ENSMUST00000108319; ENSMUST00000108318; ENSMUST00000145252; ENSMUST00000133031; ENSMUST00000147372	Ints8	protein_coding	protein_coding	integrator complex subunit 8 [Source:MGI Symbol;Acc:MGI:1919906]	0.4046	2195	GO:0034472; GO:0016180	GO:0003674	GO:0005634; GO:0032039	INTS8	72656	TRUE	-0.25966	0.000393258	0.0244335	chr4
ENSMUSG00000059486	ENSMUST00000114323; ENSMUST00000114321; ENSMUST00000151308; ENSMUST00000124994	Kbtbd2	protein_coding	protein_coding	kelch repeat and BTB (POZ) domain containing 2 [Source:MGI Symbol;Acc:MGI:2384811]	0.436	2094	GO:0010467; GO:0006006; GO:0006629; GO:0032868; GO:0014065	GO:0005515		KBTBD2	210973	TRUE	-0.166168	0.000398987	0.0244335	chr6
ENSMUSG00000003226	ENSMUST00000219332; ENSMUST00000003310; ENSMUST00000220131	Ranbp2	protein_coding	protein_coding	RAN binding protein 2 [Source:MGI Symbol;Acc:MGI:894323]	0.4007	4584	GO:0046907; GO:0006457; GO:0000413; GO:0015031; GO:0051028; GO:0016925; GO:0006607; GO:0006913; GO:0006111; GO:0051168; GO:0033133; GO:0051642	GO:0005515; GO:0003755; GO:0044877; GO:0016740; GO:0046872; GO:0003723; GO:0005096; GO:0031267; GO:0019789; GO:0061665	GO:0005654; GO:0005634; GO:0016020; GO:0043231; GO:0005737; GO:0031965; GO:0005635; GO:0005643; GO:0005642; GO:0042405; GO:0044615; GO:0044614; GO:0106068; GO:1990723	RANBP2,RGPD1,RGPD2,RGPD3,RGPD4,RGPD5,RGPD6,RGPD8	19386	TRUE	-0.210711	0.000399827	0.0244335	chr10
ENSMUSG00000062683	ENSMUST00000185641; ENSMUST00000075630; ENSMUST00000187160; ENSMUST00000186952	Atp5g2	protein_coding	protein_coding	ATP synthase, H+ transporting, mitochondrial F0 complex, subunit C2 (subunit 9) [Source:MGI Symbol;Acc:MGI:1915192]	0.568	640	GO:0015986; GO:1902600; GO:0006811; GO:0046931	GO:0015078; GO:0008289; GO:0022834	GO:0045263; GO:0033177; GO:0005739; GO:0016020; GO:0016021; GO:0031966; GO:0000276; GO:0034703	ATP5MC2	67942	TRUE	0.157389	0.000399916	0.0244335	chr15
ENSMUSG00000035686	ENSMUST00000043077; ENSMUST00000206613	Thrsp	protein_coding	protein_coding	thyroid hormone responsive [Source:MGI Symbol;Acc:MGI:109126]	0.5297	1338	GO:0009617; GO:0006629; GO:0010866; GO:0046890	GO:0005515; GO:0042802; GO:0042803; GO:0140678	GO:0005654; GO:0005634; GO:0005737; GO:0005829	THRSP	21835	TRUE	0.344825	0.000400639	0.0244335	chr7
ENSMUSG00000001376	ENSMUST00000001412; ENSMUST00000170873; ENSMUST00000164052; ENSMUST00000184780; ENSMUST00000183935; ENSMUST00000184461; ENSMUST00000183532; ENSMUST00000184959; ENSMUST00000184411	Vps50	protein_coding	protein_coding	VPS50 EARP/GARPII complex subunit [Source:MGI Symbol;Acc:MGI:1920538]	0.4141	2509	GO:0015031; GO:0032456	GO:0000149	GO:0016020; GO:0048471; GO:0005768; GO:0055037; GO:1990745	VPS50	73288	TRUE	-0.163784	0.000400872	0.0244335	chr6
ENSMUSG00000048388	ENSMUST00000051454; ENSMUST00000148184	Fam171b	protein_coding	protein_coding	family with sequence similarity 171, member B [Source:MGI Symbol;Acc:MGI:2444579]	0.409	2984	GO:0008150	GO:0003674	GO:0005575; GO:0016020; GO:0016021	FAM171B	241520	TRUE	-0.182368	0.000402405	0.0244335	chr2
ENSMUSG00000021140	ENSMUST00000221721; ENSMUST00000021567; ENSMUST00000222005; ENSMUST00000221675; ENSMUST00000222828; ENSMUST00000222908; ENSMUST00000221472; ENSMUST00000222468	Pcnx	protein_coding	protein_coding	pecanex homolog [Source:MGI Symbol;Acc:MGI:1891924]	0.4986	4706	GO:0008150	GO:0003674	GO:0016021; GO:0016020; GO:0005575	PCNX1	54604	TRUE	-0.174005	0.000402694	0.0244335	chr12
ENSMUSG00000056342	ENSMUST00000180046; ENSMUST00000137823; ENSMUST00000155984; ENSMUST00000130131; ENSMUST00000129521; ENSMUST00000148927; ENSMUST00000129368; ENSMUST00000125701	Usp34	protein_coding	protein_coding	ubiquitin specific peptidase 34 [Source:MGI Symbol;Acc:MGI:109473]	0.3919	4302	GO:0006511; GO:0016579; GO:0006508; GO:0016055; GO:0071108; GO:0090263	GO:0004843; GO:0016787; GO:0008233; GO:0008234; GO:0004197	GO:0005829; GO:0005634	USP34	17847	TRUE	-0.234413	0.000409527	0.024658	chr11
ENSMUSG00000047888	ENSMUST00000067689; ENSMUST00000226857; ENSMUST00000228071; ENSMUST00000228124; ENSMUST00000227546; ENSMUST00000228320; ENSMUST00000227449; ENSMUST00000226461; ENSMUST00000226442; ENSMUST00000228525	Tnrc6b	protein_coding	protein_coding	trinucleotide repeat containing 6b [Source:MGI Symbol;Acc:MGI:2443730]	0.4649	3750	GO:0035278; GO:0031047; GO:0006417; GO:0060213; GO:1900153; GO:0035195	GO:0003676; GO:0003723	GO:0005737; GO:0005654; GO:0000932	TNRC6B	213988	TRUE	-0.246956	0.000410802	0.024658	chr15
ENSMUSG00000028138	ENSMUST00000005964; ENSMUST00000162024; ENSMUST00000197643; ENSMUST00000160625; ENSMUST00000160201; ENSMUST00000198126; ENSMUST00000159392	Adh5	protein_coding	protein_coding	alcohol dehydrogenase 5 (class III), chi polypeptide [Source:MGI Symbol;Acc:MGI:87929]	0.5141	1262	GO:0032496; GO:0006629; GO:0006068; GO:0003016; GO:0045777; GO:0006069; GO:0051775; GO:0051409; GO:0001523; GO:0018119; GO:0010430; GO:0046294	GO:0008270; GO:0016491; GO:0046872; GO:0042802; GO:0016616; GO:0004022; GO:0004024; GO:0005504; GO:0018455; GO:0018467; GO:0051903; GO:0106321; GO:0106322	GO:0005739; GO:0005634; GO:0005737; GO:0005829	ADH5	11532	TRUE	0.141496	0.000411474	0.024658	chr3
ENSMUSG00000020888	ENSMUST00000019362; ENSMUST00000102575; ENSMUST00000190940; ENSMUST00000130820; ENSMUST00000135422; ENSMUST00000149477; ENSMUST00000152732	Dvl2	protein_coding	protein_coding	dishevelled segment polarity protein 2 [Source:MGI Symbol;Acc:MGI:106613]	0.5712	2418	GO:0035556; GO:0045944; GO:0060070; GO:0007507; GO:0003007; GO:0016055; GO:0048731; GO:0001934; GO:0008104; GO:0006355; GO:0051091; GO:0001843; GO:0060071; GO:0007379; GO:0061098; GO:0022007; GO:0022603; GO:0043507; GO:0090179; GO:0003151; GO:0035567; GO:0043547; GO:0060029; GO:0090103; GO:0035282; GO:0044340; GO:0150012	GO:0005515; GO:0042802; GO:0019904; GO:0043621; GO:0005109; GO:0019901; GO:0031267; GO:0030674	GO:0005737; GO:0016604; GO:0005654; GO:0005634; GO:0016020; GO:0005886; GO:0005829; GO:0031410; GO:0045177; GO:0016328; GO:0016235; GO:0005938; GO:0030136; GO:0005856	DVL2	13543	TRUE	0.316553	0.000413274	0.0246643	chr11
ENSMUSG00000029596	ENSMUST00000052258; ENSMUST00000031594; ENSMUST00000132916	Sdsl	protein_coding	protein_coding	serine dehydratase-like [Source:MGI Symbol;Acc:MGI:2182607]	0.6183	1046	GO:0006629; GO:0044238; GO:0071704; GO:0006565; GO:0006567; GO:0009097	GO:0016829; GO:0042802; GO:0003941; GO:0004794	GO:0005739	SDSL	257635	TRUE	0.442769	0.000416672	0.0246831	chr5
ENSMUSG00000022587	ENSMUST00000188866; ENSMUST00000187606; ENSMUST00000189186; ENSMUST00000187284; ENSMUST00000190810; ENSMUST00000185861; ENSMUST00000185863; ENSMUST00000191127; ENSMUST00000191436; ENSMUST00000186927; ENSMUST00000188503; ENSMUST00000191145; ENSMUST00000191439; ENSMUST00000188042	Ly6e	protein_coding	protein_coding	lymphocyte antigen 6 complex, locus E [Source:MGI Symbol;Acc:MGI:106651]	0.5452	1449	GO:0001701; GO:2000272; GO:0046597; GO:0035265; GO:0030325; GO:0095500; GO:0055010; GO:0042415; GO:0048242	GO:0030550; GO:0033130	GO:0045202; GO:0016020; GO:0005886; GO:0031225	LY6E	17069	TRUE	0.191687	0.000417653	0.0246831	chr15
ENSMUSG00000020133	ENSMUST00000020341	2310011J03Rik	protein_coding	protein_coding	RIKEN cDNA 2310011J03 gene [Source:MGI Symbol;Acc:MGI:1913624]	0.5876	1649	GO:0008150	GO:0003674	GO:0005575	C19orf25	66374	TRUE	0.22197	0.000418674	0.0246831	chr10
ENSMUSG00000022548	ENSMUST00000130560; ENSMUST00000115230; ENSMUST00000023207; ENSMUST00000156456; ENSMUST00000155682; ENSMUST00000145837	Apod	protein_coding	protein_coding	apolipoprotein D [Source:MGI Symbol;Acc:MGI:88056]	0.5038	879	GO:0006006; GO:0006629; GO:0006869; GO:0042308; GO:0007420; GO:0071638; GO:0048662; GO:0051895; GO:0007568; GO:0000302; GO:0010642; GO:0042246; GO:1900016; GO:0014012; GO:0048678; GO:0060588; GO:2000098; GO:2000405	GO:0008289; GO:0015485	GO:0005737; GO:0005615; GO:0005783; GO:0048471; GO:0005576; GO:0030425; GO:0043025; GO:0022626	APOD	11815	TRUE	0.298565	0.000421204	0.0247322	chr16
ENSMUSG00000038538	ENSMUST00000160583; ENSMUST00000039127; ENSMUST00000162593; ENSMUST00000162026; ENSMUST00000161280; ENSMUST00000162423; ENSMUST00000159215; ENSMUST00000159925; ENSMUST00000159447	Ubn2	protein_coding	protein_coding	ubinuclein 2 [Source:MGI Symbol;Acc:MGI:2444236]	0.4357	4091	GO:0006325		GO:0005654; GO:0005634	UBN2	320538	TRUE	-0.257733	0.000427354	0.0248619	chr6
ENSMUSG00000053825	ENSMUST00000029404; ENSMUST00000169303; ENSMUST00000217854; ENSMUST00000219024	Ppfia2	protein_coding	protein_coding	protein tyrosine phosphatase, receptor type, f polypeptide (PTPRF), interacting protein (liprin), alpha 2 [Source:MGI Symbol;Acc:MGI:2443834]	0.4216	4944	GO:0060998; GO:0061001; GO:0099519	GO:0005515	GO:0005737; GO:0045202; GO:0030424; GO:0043197	PPFIA2	327814	TRUE	-0.211544	0.000427535	0.0248619	chr10
ENSMUSG00000070498	ENSMUST00000185104; ENSMUST00000031446; ENSMUST00000184422	Tmem132b	protein_coding	protein_coding	transmembrane protein 132B [Source:MGI Symbol;Acc:MGI:3609245]	0.56	3252	GO:0008150	GO:0003674	GO:0016020; GO:0016021	TMEM132B	208151	TRUE	-0.17041	0.000428535	0.0248619	chr5
ENSMUSG00000040225	ENSMUST00000182149; ENSMUST00000182660; ENSMUST00000183223; ENSMUST00000182393; ENSMUST00000182593; ENSMUST00000028016; ENSMUST00000182535; ENSMUST00000183011; ENSMUST00000182448; ENSMUST00000182288; ENSMUST00000182331; ENSMUST00000182308; ENSMUST00000193937; ENSMUST00000183286	Prrc2c	protein_coding	protein_coding	proline-rich coiled-coil 2C [Source:MGI Symbol;Acc:MGI:1913754]	0.4534	4363	GO:0030154; GO:0002244; GO:0034063	GO:0008022	GO:0005829; GO:0005737; GO:0010494	PRRC2C	226562	TRUE	-0.25724	0.000432074	0.0249677	chr1
ENSMUSG00000030077	ENSMUST00000203912; ENSMUST00000203489; ENSMUST00000066905; ENSMUST00000203830; ENSMUST00000204321; ENSMUST00000205098	Chl1	protein_coding	protein_coding	cell adhesion molecule L1-like [Source:MGI Symbol;Acc:MGI:1098266]	0.425	3819	GO:0008344; GO:0007399; GO:0007155; GO:0007411; GO:0030154; GO:0001764; GO:0050890; GO:0031175; GO:0035640; GO:0043524; GO:0031103	GO:0005515; GO:0002020	GO:0016020; GO:0016021; GO:0005886; GO:0005576; GO:0043005; GO:0045177; GO:0030425	CHL1	12661	TRUE	-0.303603	0.000438695	0.0252501	chr6
ENSMUSG00000069045	ENSMUST00000091190; ENSMUST00000188182; ENSMUST00000188484; ENSMUST00000187596	Ddx3y	protein_coding	protein_coding	DEAD box helicase 3, Y-linked [Source:MGI Symbol;Acc:MGI:1349406]	0.3559	2842	GO:0030154; GO:0007276	GO:0005524; GO:0003676; GO:0003724; GO:0016787; GO:0000166; GO:0003723; GO:0004386; GO:0016887	GO:0005829; GO:0005654; GO:0005634; GO:0005737; GO:0043186	DDX3Y	26900	TRUE	-0.270364	0.000441811	0.0253293	chrY
ENSMUSG00000024548	ENSMUST00000025430	Setbp1	protein_coding	protein_coding	SET binding protein 1 [Source:MGI Symbol;Acc:MGI:1933199]	0.483	9953	GO:0008150; GO:0006355; GO:0051568; GO:0097676	GO:0003674; GO:0003677; GO:0042800	GO:0005634; GO:0005829; GO:0016604; GO:0005654	SETBP1	240427	TRUE	-0.313781	0.000443969	0.0253533	chr18
ENSMUSG00000042312	ENSMUST00000048138	S100a13	protein_coding	protein_coding	S100 calcium binding protein A13 [Source:MGI Symbol;Acc:MGI:109581]	0.5441	715	GO:0008284; GO:0015031; GO:0001819; GO:0032730; GO:0043123; GO:0008360	GO:0046872; GO:0005507; GO:0005509; GO:0008289; GO:0008270; GO:0017134; GO:0042803; GO:0050786; GO:0048306	GO:0005634; GO:0005730; GO:0005829; GO:0005737; GO:0005654; GO:0005886; GO:0005615; GO:0048471; GO:0005576; GO:0062023	S100A13	20196	TRUE	0.364587	0.000450003	0.0255011	chr3
ENSMUSG00000053819	ENSMUST00000143383; ENSMUST00000106402; ENSMUST00000106399; ENSMUST00000066466; ENSMUST00000163226; ENSMUST00000199300; ENSMUST00000149311; ENSMUST00000134466; ENSMUST00000169051; ENSMUST00000145454; ENSMUST00000131869; ENSMUST00000106400; ENSMUST00000200171; ENSMUST00000171289; ENSMUST00000131156; ENSMUST00000129293; ENSMUST00000106401; ENSMUST00000134987; ENSMUST00000171950; ENSMUST00000147043;…	Camk2d	protein_coding	protein_coding	calcium/calmodulin-dependent protein kinase II, delta [Source:MGI Symbol;Acc:MGI:1341265]	0.4545	2456	GO:0006468; GO:0016310; GO:0000082; GO:0070374; GO:0010880; GO:0001666; GO:0032469; GO:0035022; GO:0010666; GO:0006816; GO:0060048; GO:1901897; GO:0018107; GO:0046777; GO:0010971; GO:0002028; GO:0014911; GO:0061049; GO:0018105; GO:1902514; GO:0055119; GO:1903076; GO:2000573; GO:0010649; GO:1904707; GO:0010613; GO:0003254; GO:0098901; GO:0086003; GO:0030007; GO:2000650; GO:0060341; GO:1902306	GO:0005524; GO:0004672; GO:0005516; GO:0004683; GO:0005515; GO:0016740; GO:0000166; GO:0016301; GO:0004674; GO:0042802; GO:0042803; GO:0106310; GO:0044325; GO:0031432; GO:0050998; GO:0019871	GO:0005634; GO:0005829; GO:0005737; GO:0016020; GO:0005886; GO:0032991; GO:0048471; GO:0042383; GO:0043025; GO:0016529; GO:0043226; GO:0043005; GO:0031594; GO:0033017; GO:0014704; GO:0030315; GO:0043194; GO:0005954; GO:0005783	CAMK2D	108058	TRUE	-0.181866	0.00045006	0.0255011	chr3
ENSMUSG00000036398	ENSMUST00000040402; ENSMUST00000174711; ENSMUST00000173540	Ppp1r11	protein_coding	protein_coding	protein phosphatase 1, regulatory inhibitor subunit 11 [Source:MGI Symbol;Acc:MGI:1923747]	0.5201	925	GO:0032515; GO:0016567; GO:0006511	GO:0004865; GO:0004864; GO:0061630; GO:0140678		PPP1R11	76497	TRUE	0.167919	0.00045474	0.0255769	chr17
ENSMUSG00000037259	ENSMUST00000163701; ENSMUST00000081982; ENSMUST00000124823; ENSMUST00000150816	Dzank1	protein_coding	protein_coding	double zinc ribbon and ankyrin repeat domains 1 [Source:MGI Symbol;Acc:MGI:2139080]	0.4514	4002	GO:0042462	GO:0046872; GO:0003674	GO:0005575	DZANK1	241688	TRUE	-0.207001	0.000454911	0.0255769	chr2
ENSMUSG00000032867	ENSMUST00000049474; ENSMUST00000201545	Fbxw8	protein_coding	protein_coding	F-box and WD-40 domain protein 8 [Source:MGI Symbol;Acc:MGI:1923041]	0.5776	3468	GO:0008283; GO:0016567; GO:0007030; GO:0006511; GO:0050775; GO:0060716; GO:0060712; GO:1901485	GO:0005515; GO:0004842	GO:0005829; GO:0005737; GO:0005794; GO:0048471; GO:0019005; GO:1990393; GO:0031467	FBXW8	231672	TRUE	0.119583	0.000466713	0.0261395	chr5
ENSMUSG00000036748	ENSMUST00000235485; ENSMUST00000167861; ENSMUST00000051234; ENSMUST00000235977; ENSMUST00000236046; ENSMUST00000236061; ENSMUST00000236980; ENSMUST00000238013; ENSMUST00000236236; ENSMUST00000238062; ENSMUST00000237382; ENSMUST00000236768; ENSMUST00000236066; ENSMUST00000236651	Cuedc2	protein_coding	protein_coding	CUE domain containing 2 [Source:MGI Symbol;Acc:MGI:1914366]	0.578	992	GO:0010936; GO:1900016	GO:0043130; GO:0003674	GO:0005829; GO:0005654; GO:0005634; GO:0005737; GO:0031965	CUEDC2	67116	TRUE	0.133319	0.000469518	0.0261959	chr19
ENSMUSG00000035851	ENSMUST00000119339; ENSMUST00000120498; ENSMUST00000156363; ENSMUST00000038384; ENSMUST00000198167; ENSMUST00000151489; ENSMUST00000148142; ENSMUST00000124123; ENSMUST00000123625	Ythdc1	protein_coding	protein_coding	YTH domain containing 1 [Source:MGI Symbol;Acc:MGI:2443713]	0.4089	3254	GO:0001701; GO:0007283; GO:0009048; GO:0006406; GO:0008380; GO:0006397; GO:0000398; GO:0000381; GO:0110104; GO:0006376; GO:0048024; GO:0010608; GO:0048160	GO:0003723; GO:0003729; GO:0005515; GO:1990247	GO:0005634; GO:0016607; GO:0016604; GO:0005654; GO:0005886	YTHDC1	231386	TRUE	-0.143427	0.000474701	0.026384	chr5
ENSMUSG00000033542	ENSMUST00000031750; ENSMUST00000182924; ENSMUST00000183227; ENSMUST00000183094; ENSMUST00000182190; ENSMUST00000182752; ENSMUST00000183313; ENSMUST00000182647	Arhgef5	protein_coding	protein_coding	Rho guanine nucleotide exchange factor (GEF) 5 [Source:MGI Symbol;Acc:MGI:1858952]	0.482	2286	GO:0035556; GO:0043547; GO:0051091; GO:0043087; GO:0051493; GO:0090630; GO:0061484; GO:0032956; GO:0051496; GO:0030036; GO:0002408; GO:0043507; GO:0071803; GO:1904591; GO:0050790	GO:0005515; GO:0005085; GO:0008289	GO:0005634; GO:0005829; GO:0005737; GO:0005654; GO:0005886; GO:0071944; GO:0070161; GO:0042995; GO:0002102	ARHGEF5	54324	TRUE	-0.546527	0.000479327	0.0265398	chr6
ENSMUSG00000020102	ENSMUST00000211781; ENSMUST00000063318; ENSMUST00000210780; ENSMUST00000105257; ENSMUST00000210069; ENSMUST00000209246	Slc16a7	protein_coding	protein_coding	solute carrier family 16 (monocarboxylic acid transporters), member 7 [Source:MGI Symbol;Acc:MGI:1330284]	0.4454	3200	GO:0055085; GO:0015718; GO:1901475; GO:1905039; GO:0035873; GO:0035879	GO:0022857; GO:0015293; GO:0042802; GO:0008028; GO:0015129; GO:0050833	GO:0005737; GO:0005654; GO:0016020; GO:0016021; GO:0005886; GO:0005887; GO:0016323; GO:0098978; GO:0099061; GO:0098688; GO:0098685; GO:0098686	SLC16A7	20503	TRUE	-0.367909	0.000486312	0.0267512	chr10
ENSMUSG00000044071	ENSMUST00000218926; ENSMUST00000238972; ENSMUST00000050756; ENSMUST00000219723	Tafa2	protein_coding	protein_coding	TAFA chemokine like family member 2 [Source:MGI Symbol;Acc:MGI:2143691]	0.4672	4010	GO:0007165; GO:0007613; GO:0008542	GO:0048018	GO:0005634; GO:0005737; GO:0005615	TAFA2	268354	TRUE	-0.227641	0.00048682	0.0267512	chr10
ENSMUSG00000054604	ENSMUST00000067744; ENSMUST00000136532	Cggbp1	protein_coding	protein_coding	CGG triplet repeat binding protein 1 [Source:MGI Symbol;Acc:MGI:2146370]	0.4516	2592	GO:0040029; GO:0000122; GO:0006357; GO:0010468	GO:0003677; GO:0003690; GO:0042802; GO:0140297	GO:0005634; GO:0005654	CGGBP1	106143	TRUE	-0.216457	0.000491665	0.0269159	chr16
ENSMUSG00000031242	ENSMUST00000120722; ENSMUST00000191183	2610002M06Rik	protein_coding	protein_coding	RIKEN cDNA 2610002M06 gene [Source:MGI Symbol;Acc:MGI:1914278]	0.3714	3398	GO:0007034; GO:0015031; GO:0007049; GO:0051301; GO:0036258; GO:0051469; GO:0061763; GO:0090148; GO:0045324; GO:0032509		GO:0005737; GO:0016020; GO:0005829; GO:0005768; GO:0031902; GO:0005771; GO:0000815			TRUE	-0.223762	0.000502606	0.0274118	chrX
ENSMUSG00000026499	ENSMUST00000027780; ENSMUST00000192420	Acbd3	protein_coding	protein_coding	acyl-Coenzyme A binding domain containing 3 [Source:MGI Symbol;Acc:MGI:2181074]	0.4296	3520		GO:0000062; GO:0034237	GO:0000139; GO:0005794	ACBD3	170760	TRUE	-0.177852	0.000509361	0.0276765	chr1
ENSMUSG00000054008	ENSMUST00000235795; ENSMUST00000237783; ENSMUST00000169273; ENSMUST00000237572; ENSMUST00000237885; ENSMUST00000237070	Ndst1	protein_coding	protein_coding	N-deacetylase/N-sulfotransferase (heparan glucosaminyl) 1 [Source:MGI Symbol;Acc:MGI:104719]	0.5621	3273	GO:0007507; GO:0008283; GO:0008152; GO:0006954; GO:0043410; GO:0003279; GO:0035904; GO:0060976; GO:0048702; GO:0008543; GO:0030900; GO:0045880; GO:0009887; GO:0015012; GO:0030210; GO:0030203; GO:0030901; GO:0006476; GO:0007585; GO:0048703; GO:0015014; GO:0000271; GO:0006477	GO:0016787; GO:0015016; GO:0008146; GO:0016740; GO:0003824; GO:0005515; GO:0019213; GO:0050119; GO:0102140	GO:0016020; GO:0016021; GO:0000139; GO:0005794; GO:0032588	NDST1	15531	TRUE	-0.156371	0.000524037	0.0283681	chr18
ENSMUSG00000030798	ENSMUST00000098461; ENSMUST00000209779; ENSMUST00000033063; ENSMUST00000210226; ENSMUST00000209677; ENSMUST00000211373; ENSMUST00000210000; ENSMUST00000210078; ENSMUST00000210372	Cd37	protein_coding	protein_coding	CD37 antigen [Source:MGI Symbol;Acc:MGI:88330]	0.572	1070	GO:0050688; GO:0042832; GO:0042098; GO:0042130; GO:0002639; GO:0030886; GO:0002920		GO:0016021; GO:0016020; GO:0001772; GO:0005887	CD37	12493	TRUE	0.524214	0.000527765	0.0283742	chr7
ENSMUSG00000114797	ENSMUST00000225311; ENSMUST00000041905; ENSMUST00000225111; ENSMUST00000223713; ENSMUST00000223596; ENSMUST00000224575; ENSMUST00000225572	Gm49336	protein_coding	protein_coding	predicted gene, 49336 [Source:MGI Symbol;Acc:MGI:6121524]	0.4205	2599	GO:0042306; GO:0015031; GO:0051028; GO:0006913	GO:0044877; GO:0042802; GO:0017056; GO:0008139; GO:0005515	GO:0005634; GO:0016020; GO:0032991; GO:0031965; GO:0005635; GO:0005643			TRUE	-0.183629	0.000528045	0.0283742	chr14
ENSMUSG00000006390	ENSMUST00000006557; ENSMUST00000167636; ENSMUST00000102673; ENSMUST00000135162; ENSMUST00000129419; ENSMUST00000143140; ENSMUST00000067896	Elovl1	protein_coding	protein_coding	elongation of very long chain fatty acids (FEN1/Elo2, SUR4/Elo3, yeast)-like 1 [Source:MGI Symbol;Acc:MGI:1858959]	0.5352	1030	GO:0019367; GO:0042761; GO:0006629; GO:0006631; GO:0006633; GO:0008610; GO:0044249; GO:0044255; GO:0006636; GO:0061436; GO:0030148; GO:0046513; GO:0034625; GO:0034626; GO:0035338; GO:0006094	GO:0009922; GO:0016740; GO:0102756; GO:0102338; GO:0102337	GO:0016021; GO:0005783; GO:0016020; GO:0005789; GO:0030176	ELOVL1	54325	TRUE	0.273299	0.000531696	0.0284653	chr4
ENSMUSG00000002205	ENSMUST00000002275; ENSMUST00000134750; ENSMUST00000171821; ENSMUST00000147952; ENSMUST00000165957; ENSMUST00000144515; ENSMUST00000125705; ENSMUST00000136069; ENSMUST00000135783; ENSMUST00000208083	Vrk3	protein_coding	protein_coding	vaccinia related kinase 3 [Source:MGI Symbol;Acc:MGI:2182465]	0.5319	1276	GO:0006468; GO:0007519; GO:0018105; GO:0007165; GO:0070373; GO:0032516	GO:0005524; GO:0004672; GO:0000166; GO:0004674; GO:0019903	GO:0005634; GO:0005730; GO:0005654; GO:0043231; GO:0005737	VRK3	101568	TRUE	0.199425	0.000533953	0.0284814	chr7
ENSMUSG00000035890	ENSMUST00000047203; ENSMUST00000218770; ENSMUST00000219189	Rnf126	protein_coding	protein_coding	ring finger protein 126 [Source:MGI Symbol;Acc:MGI:1917544]	0.6367	1273	GO:0042127; GO:0006511; GO:0016567; GO:0043161; GO:0006513; GO:0042147; GO:0042059; GO:0070936; GO:0070534; GO:0043162; GO:0071629	GO:0061630; GO:0016740; GO:0046872; GO:0005515; GO:0005154	GO:0005634; GO:0005829; GO:0005737; GO:0005654	RNF126	70294	TRUE	0.179904	0.000541252	0.0287654	chr10
ENSMUSG00000029992	ENSMUST00000113657; ENSMUST00000113658; ENSMUST00000204872; ENSMUST00000150410; ENSMUST00000113655; ENSMUST00000032057; ENSMUST00000146410	Gfpt1	protein_coding	protein_coding	glutamine fructose-6-phosphate transaminase 1 [Source:MGI Symbol;Acc:MGI:95698]	0.4574	2141	GO:1901135; GO:0048511; GO:0006048; GO:0032922; GO:0006487; GO:0006541; GO:0006002; GO:0006047; GO:0006042; GO:0045719; GO:1901137	GO:0097367; GO:0016740; GO:0042802; GO:0030246; GO:0008483; GO:0016597; GO:0004360		GFPT1	14583	TRUE	-0.146654	0.000548158	0.0287698	chr6
ENSMUSG00000004892	ENSMUST00000090971; ENSMUST00000194596; ENSMUST00000192274; ENSMUST00000193276; ENSMUST00000191627; ENSMUST00000194193	Bcan	protein_coding	protein_coding	brevican [Source:MGI Symbol;Acc:MGI:1096385]	0.6046	1424	GO:0007155; GO:0007160; GO:0007417; GO:0021766; GO:0001501; GO:1990138; GO:0060074	GO:0005540; GO:0005509; GO:0030246	GO:0045202; GO:0030424; GO:0005615; GO:0009986; GO:0005576; GO:0031012; GO:0071944; GO:0030425; GO:0098978; GO:0098982; GO:0033268; GO:0043194; GO:0072534; GO:0031225; GO:0098966	BCAN	12032	TRUE	0.231323	0.000548176	0.0287698	chr3
ENSMUSG00000000197	ENSMUST00000000201; ENSMUST00000228860; ENSMUST00000227818; ENSMUST00000227541; ENSMUST00000226617; ENSMUST00000228789; ENSMUST00000228766	Nalcn	protein_coding	protein_coding	sodium leak channel, non-selective [Source:MGI Symbol;Acc:MGI:2444306]	0.4292	3629	GO:0055085; GO:0006811; GO:0034220; GO:0098655; GO:0035725	GO:0005216; GO:0005261; GO:0005248	GO:0016020; GO:0016021; GO:0005886	NALCN	338370	TRUE	-0.212023	0.000550431	0.0287698	chr14
ENSMUSG00000006782	ENSMUST00000103120; ENSMUST00000148034; ENSMUST00000150414; ENSMUST00000147403	Cnp	protein_coding	protein_coding	2',3'-cyclic nucleotide 3' phosphodiesterase [Source:MGI Symbol;Acc:MGI:88437]	0.5456	1800	GO:0009214; GO:0008344; GO:0048709; GO:0000226; GO:0007409; GO:0009636; GO:0046902; GO:0007568; GO:0030900; GO:0032496	GO:0004113; GO:0016787; GO:0003723; GO:0030551	GO:0016020; GO:0005737; GO:0005886; GO:0005615; GO:0048471; GO:0005743; GO:0042470; GO:0005902; GO:0043209; GO:0005874; GO:0031143; GO:0042995; GO:0005741; GO:0035748; GO:0035749	CNP	12799	TRUE	0.227192	0.000550672	0.0287698	chr11
ENSMUSG00000061461	ENSMUST00000203623; ENSMUST00000147148; ENSMUST00000204218; ENSMUST00000204465; ENSMUST00000204839; ENSMUST00000204089	Smim20	protein_coding	protein_coding	small integral membrane protein 20 [Source:MGI Symbol;Acc:MGI:1913528]	0.5132	1036	GO:0033617	GO:0003674	GO:0016021; GO:0016020; GO:0005739; GO:0005576; GO:0005743	SMIM20	66278	TRUE	0.246912	0.000553866	0.0287698	chr5
ENSMUSG00000003970	ENSMUST00000004072; ENSMUST00000229183; ENSMUST00000229591	Rpl8	protein_coding	protein_coding	ribosomal protein L8 [Source:MGI Symbol;Acc:MGI:1350927]	0.5684	898	GO:0006412; GO:0002181	GO:0003735; GO:0003723; GO:0005515; GO:0019843; GO:1990932	GO:0005840; GO:0015934; GO:0014069; GO:0005737; GO:1990904; GO:0045202; GO:0022625; GO:0005829; GO:0098794; GO:0022626; GO:0042788	RPL8	26961	TRUE	0.164238	0.000554979	0.0287698	chr15
ENSMUSG00000041570	ENSMUST00000048309; ENSMUST00000194808; ENSMUST00000192001; ENSMUST00000192314; ENSMUST00000192933; ENSMUST00000194730	Camsap2	protein_coding	protein_coding	calmodulin regulated spectrin-associated protein family, member 2 [Source:MGI Symbol;Acc:MGI:1922434]	0.4692	4373	GO:0031175; GO:0000226; GO:0031113; GO:0033043; GO:0050773; GO:0061564; GO:1903358; GO:0007026; GO:0031122	GO:0005515; GO:0005516; GO:0008017; GO:0030507; GO:0051011	GO:0005737; GO:0005856; GO:0005874; GO:0005794; GO:0005813; GO:0005829; GO:0036449; GO:1990752; GO:0015630; GO:0042995; GO:0036064	CAMSAP2	67886	TRUE	-0.185901	0.000556286	0.0287698	chr1
ENSMUSG00000036390	ENSMUST00000043098; ENSMUST00000151958; ENSMUST00000204369; ENSMUST00000204282; ENSMUST00000128617; ENSMUST00000126194; ENSMUST00000155041	Gadd45a	protein_coding	protein_coding	growth arrest and DNA-damage-inducible 45 alpha [Source:MGI Symbol;Acc:MGI:107799]	0.5826	734	GO:0000122; GO:0051726; GO:0006974; GO:0007049; GO:2000379; GO:0043065; GO:0007098; GO:0046330; GO:0071479; GO:0006469; GO:1900745; GO:0043537; GO:0071901; GO:0042770; GO:0016525; GO:0033140; GO:0071260	GO:0005515; GO:0042803; GO:0019900; GO:0046982; GO:0047485; GO:1990841	GO:0005634; GO:0016607; GO:0005737	GADD45A	13197	TRUE	0.305987	0.00055714	0.0287698	chr6
ENSMUSG00000036550	ENSMUST00000098473; ENSMUST00000068452; ENSMUST00000211887; ENSMUST00000212302; ENSMUST00000213006; ENSMUST00000212369; ENSMUST00000212415; ENSMUST00000212535; ENSMUST00000212712; ENSMUST00000212195; ENSMUST00000212340; ENSMUST00000211973; ENSMUST00000213046; ENSMUST00000211937; ENSMUST00000212228; ENSMUST00000212556; ENSMUST00000212323	Cnot1	protein_coding	protein_coding	CCR4-NOT transcription complex, subunit 1 [Source:MGI Symbol;Acc:MGI:2442402]	0.446	3126	GO:0035195; GO:0017148; GO:0000122; GO:2000036; GO:0061014; GO:0031047; GO:0006417; GO:0090503; GO:0010606; GO:0033147; GO:0048387; GO:0000288; GO:0060213; GO:1900153; GO:0001829	GO:0005515; GO:0019904; GO:0060090; GO:0042974; GO:0004535; GO:0030331; GO:0070016	GO:0005829; GO:0000932; GO:0005634; GO:0005737; GO:0030015; GO:0030014	CNOT1	234594	TRUE	-0.16476	0.000560112	0.0288191	chr8
ENSMUSG00000063765	ENSMUST00000173598; ENSMUST00000072910; ENSMUST00000173898; ENSMUST00000230849	Chadl	protein_coding	protein_coding	chondroadherin-like [Source:MGI Symbol;Acc:MGI:3036284]	0.6406	2083	GO:0032331; GO:1904027	GO:0005515; GO:0005518; GO:0098633	GO:0005615; GO:0005576; GO:0031012; GO:0062023	CHADL	214685	TRUE	0.232965	0.000562053	0.0288191	chr15
ENSMUSG00000025868	ENSMUST00000026986	Higd2a	protein_coding	protein_coding	HIG1 domain family, member 2A [Source:MGI Symbol;Acc:MGI:1914294]	0.534	648	GO:0043066; GO:0097250	GO:0003674	GO:0005739; GO:0016020; GO:0016021; GO:0005743; GO:0031966	HIGD2A,HIGD2B	67044	TRUE	0.160746	0.000576901	0.0293789	chr13
ENSMUSG00000031825	ENSMUST00000132583; ENSMUST00000034282; ENSMUST00000108972; ENSMUST00000151629; ENSMUST00000144801	Crispld2	protein_coding	protein_coding	cysteine-rich secretory protein LCCL domain containing 2 [Source:MGI Symbol;Acc:MGI:1926142]	0.5666	2245	GO:0060325; GO:0030198; GO:0030324	GO:0008201; GO:0005539	GO:0005576; GO:0005615; GO:0031012; GO:0030133	CRISPLD2	78892	TRUE	0.693499	0.000578703	0.0293789	chr8
ENSMUSG00000030281	ENSMUST00000058300; ENSMUST00000204447; ENSMUST00000205208; ENSMUST00000204632; ENSMUST00000203668	Il17rc	protein_coding	protein_coding	interleukin 17 receptor C [Source:MGI Symbol;Acc:MGI:2159336]	0.5869	1064	GO:1900017; GO:0006954; GO:0019221; GO:0032755; GO:0071621; GO:0050832	GO:0005515; GO:0005102; GO:0030368	GO:0016020; GO:0016021; GO:0005886; GO:0009986	IL17RC	171095	TRUE	0.529447	0.000579199	0.0293789	chr6
ENSMUSG00000033475	ENSMUST00000113302; ENSMUST00000113301; ENSMUST00000143156	Tomm6	protein_coding	protein_coding	translocase of outer mitochondrial membrane 6 [Source:MGI Symbol;Acc:MGI:1913369]	0.5464	793	GO:0015031	GO:0003674	GO:0005742; GO:0005739; GO:0016020; GO:0005741	TOMM6	66119	TRUE	0.192517	0.000583221	0.0293789	chr17
ENSMUSG00000048537	ENSMUST00000147495; ENSMUST00000144251; ENSMUST00000156918; ENSMUST00000128326; ENSMUST00000138356; ENSMUST00000034611; ENSMUST00000135436; ENSMUST00000148344; ENSMUST00000134465; ENSMUST00000129806; ENSMUST00000133312; ENSMUST00000123310; ENSMUST00000154723; ENSMUST00000123123; ENSMUST00000123406; ENSMUST00000148929; ENSMUST00000126818; ENSMUST00000123003	Phldb1	protein_coding	protein_coding	pleckstrin homology like domain, family B, member 1 [Source:MGI Symbol;Acc:MGI:2143230]	0.5955	2550	GO:0010470; GO:0010717; GO:0070507; GO:1904261	GO:0003674	GO:0005829; GO:0005886; GO:0043231; GO:0045171; GO:0045180	PHLDB1	102693	TRUE	0.221532	0.000583292	0.0293789	chr9
ENSMUSG00000000804	ENSMUST00000108075; ENSMUST00000000821; ENSMUST00000173156; ENSMUST00000174602; ENSMUST00000172515; ENSMUST00000172950; ENSMUST00000173271; ENSMUST00000172595; ENSMUST00000174809	Usp32	protein_coding	protein_coding	ubiquitin specific peptidase 32 [Source:MGI Symbol;Acc:MGI:2144475]	0.4682	1566	GO:0006511; GO:0016579; GO:0006508	GO:0005509; GO:0004843; GO:0046872; GO:0016787; GO:0008233; GO:0008234	GO:0005829; GO:0005794; GO:0005634; GO:0005737	USP32	237898	TRUE	-0.171987	0.000589103	0.0293789	chr11
ENSMUSG00000033382	ENSMUST00000225661; ENSMUST00000225502; ENSMUST00000223584; ENSMUST00000097658; ENSMUST00000224530	Trappc8	protein_coding	protein_coding	trafficking protein particle complex 8 [Source:MGI Symbol;Acc:MGI:2443008]	0.413	3216	GO:0034497; GO:0006888; GO:0007030; GO:0048208; GO:0099022	GO:0003674	GO:0031410; GO:0000407; GO:0030008; GO:1990072; GO:0005737	TRAPPC8	75964	TRUE	-0.185081	0.000589188	0.0293789	chr18
ENSMUSG00000046873	ENSMUST00000065857; ENSMUST00000058098; ENSMUST00000112522; ENSMUST00000179062; ENSMUST00000134211; ENSMUST00000139786; ENSMUST00000149249; ENSMUST00000152826	Mbtps2	protein_coding	protein_coding	membrane-bound transcription factor peptidase, site 2 [Source:MGI Symbol;Acc:MGI:2444506]	0.4426	2300	GO:0006508; GO:0006629; GO:0008202; GO:0008203; GO:0051091; GO:1990440; GO:0031293; GO:0070977; GO:1905897; GO:0045944; GO:0006357	GO:0004222; GO:0046872; GO:0016787; GO:0008233; GO:0008237; GO:0043565; GO:0003677; GO:0000978; GO:0000981; GO:0001228; GO:1990837; GO:0000987	GO:0005737; GO:0016020; GO:0016021; GO:0005789; GO:0000139; GO:0005634; GO:0005667; GO:0031519	MBTPS2	270669	TRUE	-0.271775	0.000591194	0.0293789	chrX
ENSMUSG00000022641	ENSMUST00000138166; ENSMUST00000066037; ENSMUST00000089404; ENSMUST00000114488; ENSMUST00000089399; ENSMUST00000114477; ENSMUST00000131695; ENSMUST00000142818; ENSMUST00000130210	Bbx	protein_coding	protein_coding	bobby sox HMG box containing [Source:MGI Symbol;Acc:MGI:1917758]	0.4444	3739	GO:0060348; GO:0006357	GO:0003677; GO:0000977; GO:0000981; GO:1990837	GO:0005829; GO:0005654; GO:0005634	BBX	70508	TRUE	-0.23127	0.000593809	0.0293789	chr16
ENSMUSG00000037697	ENSMUST00000111828; ENSMUST00000087320; ENSMUST00000051310; ENSMUST00000152110; ENSMUST00000129599; ENSMUST00000149286; ENSMUST00000156758; ENSMUST00000141487; ENSMUST00000126428; ENSMUST00000226301; ENSMUST00000147551; ENSMUST00000153547; ENSMUST00000226559	Ddhd1	protein_coding	protein_coding	DDHD domain containing 1 [Source:MGI Symbol;Acc:MGI:2150302]	0.4689	3332	GO:0090141	GO:0046872		DDHD1	114874	TRUE	-0.128677	0.000600534	0.0293789	chr14
ENSMUSG00000054874	ENSMUST00000113615; ENSMUST00000146638; ENSMUST00000068169; ENSMUST00000124905; ENSMUST00000133136; ENSMUST00000132420; ENSMUST00000145270; ENSMUST00000137313; ENSMUST00000127876; ENSMUST00000141577; ENSMUST00000147161; ENSMUST00000135119	Pcnx3	protein_coding	protein_coding	pecanex homolog 3 [Source:MGI Symbol;Acc:MGI:1861733]	0.5976	2142	GO:0008150	GO:0003674	GO:0016021; GO:0005575; GO:0016020	PCNX3	104401	TRUE	-0.161911	0.000602225	0.0293789	chr19
ENSMUSG00000064264	ENSMUST00000176880; ENSMUST00000071361; ENSMUST00000177228; ENSMUST00000177205	Zfp428	protein_coding	protein_coding	zinc finger protein 428 [Source:MGI Symbol;Acc:MGI:1916463]	0.6519	955	GO:0008150	GO:0003674; GO:0046872		ZNF428	232969	TRUE	0.226943	0.000604441	0.0293789	chr7
ENSMUSG00000024122	ENSMUST00000102927; ENSMUST00000115411; ENSMUST00000115409; ENSMUST00000115407; ENSMUST00000052462; ENSMUST00000147199; ENSMUST00000140906; ENSMUST00000150578; ENSMUST00000144533; ENSMUST00000154982; ENSMUST00000128997	Pdpk1	protein_coding	protein_coding	3-phosphoinositide dependent protein kinase 1 [Source:MGI Symbol;Acc:MGI:1338068]	0.4891	2134	GO:0006468; GO:0043524; GO:0016310; GO:0035556; GO:0018105; GO:0007165; GO:0034122; GO:0048041; GO:0010594; GO:0010667; GO:0003323; GO:0043304; GO:0006972; GO:0006469; GO:0007173; GO:0010518; GO:0016477; GO:0018107; GO:0019722; GO:0030512; GO:0032148; GO:0032869; GO:0043122; GO:0043536; GO:0045766; GO:0051281; GO:0071364; GO:0097191; GO:1903078; GO:1903672; GO:1905564; GO:2000352	GO:0005524; GO:0004672; GO:0005515; GO:0016740; GO:0000166; GO:0016301; GO:0004674; GO:0106310; GO:0019901; GO:0005158; GO:0043274; GO:0016004; GO:0004676	GO:0014069; GO:0005829; GO:0005737; GO:0005634; GO:0016020; GO:0005886; GO:0070161; GO:0005925; GO:0031410; GO:0043204; GO:0042995	PDPK1,PDPK2P	18607	TRUE	-0.133693	0.000605011	0.0293789	chr17
ENSMUSG00000047213	ENSMUST00000108345; ENSMUST00000193598; ENSMUST00000191774; ENSMUST00000108346	Ythdf3	protein_coding	protein_coding	YTH N6-methyladenosine RNA binding protein 3 [Source:MGI Symbol;Acc:MGI:1918850]	0.4318	3488	GO:0061157; GO:0045727; GO:0043488; GO:0060339; GO:1901163; GO:0034063; GO:0070925	GO:0003723; GO:0003729; GO:0043022; GO:1990247	GO:0005737; GO:0000932; GO:0005829; GO:0010494	YTHDF3	229096	TRUE	-0.218929	0.000605018	0.0293789	chr3
ENSMUSG00000061518	ENSMUST00000081180; ENSMUST00000193210; ENSMUST00000195151; ENSMUST00000191790; ENSMUST00000192859; ENSMUST00000193235	Cox5b	protein_coding	protein_coding	cytochrome c oxidase subunit 5B [Source:MGI Symbol;Acc:MGI:88475]	0.5477	549	GO:0006123; GO:0008150; GO:0009725; GO:0043434	GO:0003674	GO:0005751; GO:0005740; GO:0005575	COX5B	12859	TRUE	0.187231	0.000605043	0.0293789	chr1
ENSMUSG00000028743	ENSMUST00000073787; ENSMUST00000153645	Akr7a5	protein_coding	protein_coding	aldo-keto reductase family 7, member A5 (aflatoxin aldehyde reductase) [Source:MGI Symbol;Acc:MGI:107796]	0.5753	995	GO:0006629	GO:0016491; GO:0042802; GO:0004032; GO:0004033; GO:0019119	GO:0005739; GO:0005829; GO:0005737; GO:0005794; GO:0005635	AKR7A2,AKR7A3,AKR7L	110198	TRUE	0.185819	0.000605561	0.0293789	chr4
ENSMUSG00000006736	ENSMUST00000060991; ENSMUST00000218488; ENSMUST00000218603; ENSMUST00000220344; ENSMUST00000217875	Tspan31	protein_coding	protein_coding	tetraspanin 31 [Source:MGI Symbol;Acc:MGI:1914375]	0.5212	693		GO:0003674	GO:0016021; GO:0016020; GO:0005887	TSPAN31	67125	TRUE	0.19879	0.000608864	0.0293789	chr10
ENSMUSG00000018501	ENSMUST00000101066; ENSMUST00000018645; ENSMUST00000155712; ENSMUST00000159315; ENSMUST00000156740; ENSMUST00000037575; ENSMUST00000101067; ENSMUST00000131911; ENSMUST00000161767; ENSMUST00000161281; ENSMUST00000161432; ENSMUST00000159224; ENSMUST00000151498; ENSMUST00000161116; ENSMUST00000101068; ENSMUST00000161288; ENSMUST00000161699; ENSMUST00000162236; ENSMUST00000127471; ENSMUST00000162077;…	Ncor1	protein_coding	protein_coding	nuclear receptor co-repressor 1 [Source:MGI Symbol;Acc:MGI:1349717]	0.4752	2514	GO:0000122; GO:0045820; GO:0045892; GO:0045922; GO:0046329; GO:0051225; GO:0060766; GO:1903799	GO:0003714; GO:0016922; GO:0042826; GO:0061629	GO:0000118; GO:0000785; GO:0005634; GO:0005654; GO:0005829; GO:0017053; GO:0072686	NCOR1	20185	TRUE	-0.187775	0.000609286	0.0293789	chr11
ENSMUSG00000028673	ENSMUST00000030434; ENSMUST00000153592; ENSMUST00000142033; ENSMUST00000146290; ENSMUST00000142111	Fuca1	protein_coding	protein_coding	fucosidase, alpha-L- 1, tissue [Source:MGI Symbol;Acc:MGI:95593]	0.5001	917	GO:0005975; GO:0008152; GO:0006629; GO:0006004; GO:0016139	GO:0004560; GO:0016787; GO:0016798; GO:0030246; GO:0015928	GO:0043231; GO:0005764	FUCA1	71665	TRUE	0.171002	0.000625392	0.0300254	chr4
ENSMUSG00000041560	ENSMUST00000044158; ENSMUST00000197477; ENSMUST00000198688; ENSMUST00000200455	Nop53	protein_coding	protein_coding	NOP53 ribosome biogenesis factor [Source:MGI Symbol;Acc:MGI:2154441]	0.5584	1717	GO:0071456; GO:0000027; GO:0000122; GO:0051898; GO:0051726; GO:0042981; GO:0006281; GO:0001932; GO:0042254; GO:0007095; GO:0031333; GO:0050821; GO:0006974; GO:0006364; GO:0014067; GO:0032435; GO:0032436; GO:1903715; GO:1901796; GO:1903006; GO:1901797; GO:1990173; GO:0039535; GO:1901837; GO:1902570	GO:0005515; GO:0042802; GO:0002039; GO:0008097	GO:0005730; GO:0005829; GO:0005654; GO:0005634; GO:0043231; GO:0001650; GO:0033553	NOP53	68077	TRUE	0.161088	0.000627079	0.0300254	chr7
ENSMUSG00000058558	ENSMUST00000082223; ENSMUST00000123183; ENSMUST00000153590; ENSMUST00000129944; ENSMUST00000140659; ENSMUST00000151767	Rpl5	protein_coding	protein_coding	ribosomal protein L5 [Source:MGI Symbol;Acc:MGI:102854]	0.4423	1034	GO:0006412; GO:0000027; GO:0010628; GO:0045727; GO:0050821; GO:0042273; GO:2000059; GO:0002181; GO:0006364; GO:0010922; GO:1901796; GO:1904667; GO:1905017; GO:1905020; GO:1905023; GO:2000435	GO:0003735; GO:0008097; GO:0003730; GO:0005515; GO:0003729; GO:0003723; GO:0019843; GO:0031625; GO:0048027; GO:1990948	GO:0005840; GO:0005634; GO:0005730; GO:1990904; GO:0014069; GO:0005829; GO:0005737; GO:0005654; GO:0032991; GO:0045202; GO:0005783; GO:0022625; GO:0022626; GO:0017101	RPL5	100503670	TRUE	0.130629	0.000629903	0.0300254	chr5
ENSMUSG00000021488	ENSMUST00000224973; ENSMUST00000099490; ENSMUST00000224156; ENSMUST00000224338; ENSMUST00000224918; ENSMUST00000225194; ENSMUST00000225982; ENSMUST00000224693; ENSMUST00000225169; ENSMUST00000223894; ENSMUST00000225405	Nsd1	protein_coding	protein_coding	nuclear receptor-binding SET-domain protein 1 [Source:MGI Symbol;Acc:MGI:1276545]	0.4611	2985	GO:0032259; GO:0006325; GO:0010468; GO:0016571; GO:0006354; GO:0000414; GO:0033135; GO:0045893; GO:1903025	GO:0005515; GO:0018024; GO:0016740; GO:0046872; GO:0008168; GO:0000978; GO:0003712; GO:0008270; GO:0046975; GO:0050681	GO:0005634; GO:0005694	NSD1	18193	TRUE	-0.146909	0.000630942	0.0300254	chr13
ENSMUSG00000026312	ENSMUST00000137092; ENSMUST00000112701; ENSMUST00000129923; ENSMUST00000145188; ENSMUST00000131464; ENSMUST00000146282; ENSMUST00000172005; ENSMUST00000027542; ENSMUST00000134301	Cdh7	protein_coding	protein_coding	cadherin 7, type 2 [Source:MGI Symbol;Acc:MGI:2442792]	0.4181	2906	GO:0098609; GO:0007156; GO:0007155; GO:0000902; GO:0098742; GO:0007043; GO:0016339; GO:0034332	GO:0005509; GO:0046872; GO:0045296	GO:0016020; GO:0005886; GO:0016021; GO:0005912; GO:0016342	CDH7	241201	TRUE	-0.271393	0.00063594	0.0301647	chr1
ENSMUSG00000021606	ENSMUST00000223293; ENSMUST00000222930; ENSMUST00000022097; ENSMUST00000147407	Ndufs6	protein_coding	protein_coding	NADH:ubiquinone oxidoreductase core subunit S6 [Source:MGI Symbol;Acc:MGI:107932]	0.5328	592	GO:0006120; GO:0035264; GO:0022904; GO:0010259; GO:0061458; GO:0001822; GO:0006936; GO:0006631; GO:0032981; GO:0072359; GO:0009060; GO:0042776; GO:0070584	GO:0003674	GO:0016020; GO:0005739; GO:0005747; GO:0005743; GO:0070469	NDUFS6	407785	TRUE	0.235978	0.000638954	0.0302092	chr13
ENSMUSG00000028289	ENSMUST00000080934; ENSMUST00000029964; ENSMUST00000108194; ENSMUST00000108191; ENSMUST00000149030; ENSMUST00000136827; ENSMUST00000129029; ENSMUST00000129912	Epha7	protein_coding	protein_coding	Eph receptor A7 [Source:MGI Symbol;Acc:MGI:95276]	0.4596	2973	GO:0006468; GO:0007169; GO:0051402; GO:0016310; GO:0007399; GO:0043525; GO:0018108; GO:0006915; GO:0048013; GO:0043065; GO:0007420; GO:0007411; GO:0022407; GO:0070372; GO:0031290; GO:0050919; GO:0033674; GO:0031952; GO:0099175; GO:0050730; GO:0001934; GO:0051964; GO:0048755; GO:0072178; GO:0043281; GO:0048671	GO:0005515; GO:0005524; GO:0005003; GO:0004672; GO:0016740; GO:0000166; GO:0016301; GO:0004713; GO:0004714; GO:0045499; GO:0046875; GO:0005005; GO:0005004; GO:0019838; GO:0008046	GO:0016021; GO:0016020; GO:0005886; GO:0005887; GO:0043025; GO:0043005; GO:0099060; GO:0030425; GO:0098978; GO:0031594; GO:0099061; GO:0043235; GO:0045211; GO:0098685; GO:0098686	EPHA7	13841	TRUE	-0.309566	0.000649707	0.0306183	chr4
ENSMUSG00000035437	ENSMUST00000133434; ENSMUST00000061179; ENSMUST00000153145; ENSMUST00000203470; ENSMUST00000148470; ENSMUST00000066055; ENSMUST00000112920; ENSMUST00000205186; ENSMUST00000130601; ENSMUST00000159092	Rabgap1	protein_coding	protein_coding	RAB GTPase activating protein 1 [Source:MGI Symbol;Acc:MGI:2385139]	0.4468	2564	GO:0007049; GO:0043547; GO:0043087; GO:0090630	GO:0005096; GO:0031267	GO:0005829; GO:0005737; GO:0005815; GO:0005856	RABGAP1	227800	TRUE	-0.130284	0.000655071	0.0306735	chr2
ENSMUSG00000041073	ENSMUST00000045713; ENSMUST00000177050; ENSMUST00000177391	Nacad	protein_coding	protein_coding	NAC alpha domain containing [Source:MGI Symbol;Acc:MGI:3603030]	0.5872	2208	GO:0015031; GO:0006612	GO:0051082	GO:0005634; GO:0005737; GO:0005854	NACAD	192950	TRUE	0.185524	0.000655093	0.0306735	chr11
ENSMUSG00000022377	ENSMUST00000177371; ENSMUST00000177083; ENSMUST00000177374; ENSMUST00000175793; ENSMUST00000175799; ENSMUST00000110114; ENSMUST00000110115; ENSMUST00000023008; ENSMUST00000176384; ENSMUST00000177035; ENSMUST00000176014; ENSMUST00000176909; ENSMUST00000176427; ENSMUST00000177475; ENSMUST00000176358; ENSMUST00000176821; ENSMUST00000175710; ENSMUST00000176516; ENSMUST00000175963	Asap1	protein_coding	protein_coding	ArfGAP with SH3 domain, ankyrin repeat and PH domain1 [Source:MGI Symbol;Acc:MGI:1342335]	0.4982	2732	GO:0043547; GO:0030030; GO:0060271; GO:0061000; GO:1903527; GO:0071803	GO:0005515; GO:0005096; GO:0046872; GO:0001786; GO:0005546; GO:0005547	GO:0005737; GO:0016020; GO:0043197; GO:0005829; GO:0002102; GO:0031253	ASAP1	13196	TRUE	-0.190771	0.000660514	0.0308282	chr15
ENSMUSG00000025137	ENSMUST00000026129; ENSMUST00000106188; ENSMUST00000124504; ENSMUST00000143502; ENSMUST00000134671; ENSMUST00000106187; ENSMUST00000124468; ENSMUST00000142049; ENSMUST00000145356; ENSMUST00000126723; ENSMUST00000126148; ENSMUST00000160059	Pcyt2	protein_coding	protein_coding	phosphate cytidylyltransferase 2, ethanolamine [Source:MGI Symbol;Acc:MGI:1915921]	0.5962	874	GO:0009058; GO:0006629; GO:0008654; GO:0006646; GO:0009098	GO:0003824; GO:0016740; GO:0016779; GO:0004306	GO:0005737	PCYT2	68671	TRUE	0.151533	0.00067422	0.0312968	chr11
ENSMUSG00000036733	ENSMUST00000108141; ENSMUST00000042726; ENSMUST00000140550	Rbm42	protein_coding	protein_coding	RNA binding motif protein 42 [Source:MGI Symbol;Acc:MGI:1915285]	0.6115	1468	GO:0048025	GO:0003723; GO:0003676	GO:0005634; GO:0005737; GO:1990904; GO:0046540	RBM42	68035	TRUE	0.149808	0.000674853	0.0312968	chr7
ENSMUSG00000029580	ENSMUST00000100497; ENSMUST00000196997; ENSMUST00000167721; ENSMUST00000171419; ENSMUST00000167386; ENSMUST00000163829; ENSMUST00000106216; ENSMUST00000165629; ENSMUST00000164765	Actb	protein_coding	protein_coding	actin, beta [Source:MGI Symbol;Acc:MGI:87904]	0.5461	876	GO:0051726; GO:0007163; GO:0048870; GO:0098974; GO:0045893; GO:0006338; GO:0006357; GO:0030071; GO:0045582; GO:0045597; GO:0045663; GO:0070316; GO:1902459; GO:2000045; GO:2000781; GO:2000819; GO:0007409; GO:0016573; GO:0001738; GO:0022898; GO:0034333; GO:0043967; GO:0043968; GO:0045176; GO:0051621; GO:0071896; GO:0072749; GO:0150111; GO:1903076; GO:1905168; GO:0008284; GO:0045596; GO:0071257; GO:…	GO:0005515; GO:0000166; GO:0005524; GO:0042802; GO:0019894; GO:0019901; GO:0030957; GO:0050998; GO:0098973	GO:0005634; GO:1990904; GO:0014069; GO:0005829; GO:0005737; GO:0030424; GO:0032991; GO:0015629; GO:0005856; GO:0005911; GO:0030027; GO:0016020; GO:0045202; GO:0098978; GO:0045121; GO:0043209; GO:0030863; GO:0005912; GO:0043296; GO:0001725; GO:0035267; GO:0036464; GO:0000785; GO:0016514; GO:0035060; GO:0071564; GO:0071565; GO:0140092; GO:0098685; GO:0000786; GO:0005886; GO:0005925; GO:0070160; GO:…	ACTB	11461	TRUE	0.169495	0.000687337	0.0317746	chr5
ENSMUSG00000024208	ENSMUST00000025045; ENSMUST00000145148; ENSMUST00000118613; ENSMUST00000119227	Uqcc2	protein_coding	protein_coding	ubiquinol-cytochrome c reductase complex assembly factor 2 [Source:MGI Symbol;Acc:MGI:1914517]	0.5608	507	GO:0070131; GO:0034551; GO:0050796; GO:0002082; GO:2001014	GO:0003674	GO:0005739; GO:0016604; GO:0016020; GO:0005743; GO:0005759; GO:0042645; GO:0005758	UQCC2	67267	TRUE	0.223751	0.000691783	0.0318789	chr17
ENSMUSG00000046330	ENSMUST00000059980; ENSMUST00000212432; ENSMUST00000212335; ENSMUST00000211963	Rpl37a	protein_coding	protein_coding	ribosomal protein L37a [Source:MGI Symbol;Acc:MGI:98068]	0.5124	518	GO:0006412; GO:0002181	GO:0003735; GO:0046872	GO:0005840; GO:0005737; GO:1990904; GO:0022625; GO:0005829; GO:0022626	RPL37A	19981	TRUE	0.199307	0.000696812	0.0319082	chr1
ENSMUSG00000057716	ENSMUST00000239008; ENSMUST00000180886; ENSMUST00000061740; ENSMUST00000180588	Tmem178b	protein_coding	protein_coding	transmembrane protein 178B [Source:MGI Symbol;Acc:MGI:3647581]	0.5253	3209	GO:0008150	GO:0003674	GO:0016021; GO:0016020	TMEM178B	434008	TRUE	-0.211774	0.000698508	0.0319082	chr6
ENSMUSG00000040188	ENSMUST00000045791; ENSMUST00000216986; ENSMUST00000213662; ENSMUST00000215942; ENSMUST00000217200; ENSMUST00000216667	Scamp2	protein_coding	protein_coding	secretory carrier membrane protein 2 [Source:MGI Symbol;Acc:MGI:1346518]	0.5536	819	GO:0015031		GO:0016021; GO:0016020; GO:0005794; GO:0110165; GO:0043231; GO:0005768; GO:0030133; GO:0055038; GO:0032588	SCAMP2	24044	TRUE	0.217597	0.000701068	0.0319082	chr9
ENSMUSG00000029804	ENSMUST00000141600; ENSMUST00000122981; ENSMUST00000203714; ENSMUST00000126292; ENSMUST00000031823; ENSMUST00000041401; ENSMUST00000154290; ENSMUST00000122908; ENSMUST00000204196; ENSMUST00000204629; ENSMUST00000205139; ENSMUST00000131132	Herc3	protein_coding	protein_coding	hect domain and RLD 3 [Source:MGI Symbol;Acc:MGI:1921248]	0.498	1287	GO:0006511; GO:0016567	GO:0061630; GO:0004842	GO:0005829; GO:0005737	HERC3	73998	TRUE	-0.175616	0.000702207	0.0319082	chr6
ENSMUSG00000039579	ENSMUST00000093859; ENSMUST00000076674; ENSMUST00000149059; ENSMUST00000131797	Grin3a	protein_coding	protein_coding	glutamate receptor ionotropic, NMDA3A [Source:MGI Symbol;Acc:MGI:1933206]	0.461	5662	GO:0006811; GO:0060078; GO:0034220; GO:0070588; GO:0045471; GO:0016358; GO:0006816; GO:0035235; GO:0048511; GO:0060134; GO:0061000; GO:2000300	GO:0015276; GO:0004970; GO:0005515; GO:0038023; GO:0005216; GO:0042802; GO:0005262; GO:0004972; GO:0016594; GO:0042165; GO:0051721; GO:1904315	GO:0016020; GO:0045202; GO:0016021; GO:0005886; GO:0045211; GO:0043005; GO:0043025; GO:0014069; GO:0098978; GO:0099061; GO:0017146	GRIN3A	242443	TRUE	-0.310706	0.000705453	0.0319082	chr4
ENSMUSG00000022521	ENSMUST00000023165; ENSMUST00000205765; ENSMUST00000191387; ENSMUST00000205945; ENSMUST00000206464; ENSMUST00000205344; ENSMUST00000206098; ENSMUST00000205685	Crebbp	protein_coding	protein_coding	CREB binding protein [Source:MGI Symbol;Acc:MGI:1098280]	0.4961	3397	GO:0006355; GO:0016573; GO:0045944; GO:0050896; GO:0006354; GO:0048511; GO:0000122; GO:0006473; GO:0018076; GO:0030511; GO:0031648; GO:0034644; GO:0045893; GO:1990258	GO:0005515; GO:0008270; GO:0004402; GO:0003712; GO:0003713; GO:0016740; GO:0046872; GO:0016746; GO:0003682; GO:0140297; GO:0001223; GO:0002039; GO:0003684; GO:0003714; GO:0016407; GO:0043426; GO:0061629; GO:0061733	GO:0005634; GO:0000123; GO:0005737; GO:0005654; GO:0000785; GO:0016604	CREBBP	12914	TRUE	-0.189126	0.000707357	0.0319082	chr16
ENSMUSG00000031592	ENSMUST00000211090; ENSMUST00000210862; ENSMUST00000045218; ENSMUST00000211247	Pcm1	protein_coding	protein_coding	pericentriolar material 1 [Source:MGI Symbol;Acc:MGI:1277958]	0.4353	4108	GO:0060271; GO:0034454; GO:0071539; GO:0035176; GO:0030030; GO:0007098; GO:0001764; GO:0033365; GO:0090316; GO:0031122; GO:1905515; GO:0035735; GO:0097150; GO:0050768; GO:0022027; GO:0034453	GO:0005515	GO:0005813; GO:0005829; GO:0005654; GO:0005737; GO:0032991; GO:0005815; GO:0005856; GO:0042995; GO:0034451; GO:0045177; GO:0031965; GO:0000242; GO:0005814; GO:0036064; GO:0035869	PCM1	18536	TRUE	-0.230607	0.000707757	0.0319082	chr8
ENSMUSG00000021134	ENSMUST00000094693; ENSMUST00000110354; ENSMUST00000133783; ENSMUST00000110352; ENSMUST00000110351; ENSMUST00000153056; ENSMUST00000152662; ENSMUST00000125814; ENSMUST00000138434; ENSMUST00000151968; ENSMUST00000110356; ENSMUST00000151036	Srsf5	protein_coding	protein_coding	serine and arginine-rich splicing factor 5 [Source:MGI Symbol;Acc:MGI:98287]	0.4505	1596	GO:0009611; GO:0032868; GO:0008380; GO:0006397; GO:0000398; GO:0033120; GO:0001889; GO:0032869; GO:0051726; GO:0097421	GO:0003723; GO:0003676; GO:0003729; GO:0005515; GO:0043422; GO:0050733	GO:0005634; GO:0005730; GO:0005829; GO:0005654; GO:0016607	SRSF5	20384	TRUE	0.287887	0.000710216	0.0319202	chr12
ENSMUSG00000038174	ENSMUST00000161600; ENSMUST00000097724; ENSMUST00000187717; ENSMUST00000038372; ENSMUST00000161000; ENSMUST00000160546; ENSMUST00000159980; ENSMUST00000191472; ENSMUST00000159185	Fam126b	protein_coding	protein_coding	family with sequence similarity 126, member B [Source:MGI Symbol;Acc:MGI:1098784]	0.4238	2655	GO:0046854; GO:0072659	GO:0003674	GO:0005737; GO:0016020; GO:0005886; GO:0005829			TRUE	-0.312961	0.000716308	0.032095	chr1
ENSMUSG00000043940	ENSMUST00000053177; ENSMUST00000173955; ENSMUST00000174598; ENSMUST00000212024; ENSMUST00000172927; ENSMUST00000174698; ENSMUST00000172512	Wdfy3	protein_coding	protein_coding	WD repeat and FYVE domain containing 3 [Source:MGI Symbol;Acc:MGI:1096875]	0.5267	6187	GO:0006914; GO:0035973	GO:0005515; GO:0046872; GO:0008289; GO:0005545; GO:0003831	GO:0005730; GO:0005829; GO:0005737; GO:0005654; GO:0005634; GO:0016020; GO:0005886; GO:0042995; GO:0043204; GO:0030424; GO:0016234; GO:0005635; GO:0019898; GO:0016605; GO:0005776; GO:0034274; GO:0097635	WDFY3	72145	TRUE	-0.184636	0.000726784	0.0323348	chr5
ENSMUSG00000049550	ENSMUST00000111564; ENSMUST00000111566; ENSMUST00000137363; ENSMUST00000111561; ENSMUST00000125340; ENSMUST00000198833; ENSMUST00000063905; ENSMUST00000137602; ENSMUST00000031382; ENSMUST00000154672; ENSMUST00000133545; ENSMUST00000154432; ENSMUST00000144121; ENSMUST00000149410; ENSMUST00000199018	Clip1	protein_coding	protein_coding	CAP-GLY domain containing linker protein 1 [Source:MGI Symbol;Acc:MGI:1928401]	0.4772	3276	GO:0031122; GO:0001578; GO:1900006; GO:0031116; GO:0044861	GO:0005515; GO:0046872; GO:0008270; GO:0042802; GO:0008017; GO:0015631; GO:0051010	GO:0005737; GO:0016020; GO:0015630; GO:0005634; GO:0031410; GO:0030659; GO:0005856; GO:0042995; GO:0005874; GO:0001726; GO:0005813; GO:0005881; GO:0035371; GO:0005635; GO:0044354	CLIP1	56430	TRUE	-0.20424	0.000729489	0.0323348	chr5
ENSMUSG00000058656	ENSMUST00000078673; ENSMUST00000154119; ENSMUST00000132059; ENSMUST00000132362	Samd12	protein_coding	protein_coding	sterile alpha motif domain containing 12 [Source:MGI Symbol;Acc:MGI:2444518]	0.4605	2724	GO:0007169	GO:0005515; GO:0003674	GO:0009898	SAMD12	320679	TRUE	-0.225017	0.000729725	0.0323348	chr15
ENSMUSG00000047248	ENSMUST00000098259; ENSMUST00000051777; ENSMUST00000133464; ENSMUST00000156559; ENSMUST00000119647; ENSMUST00000208753; ENSMUST00000184753; ENSMUST00000185051; ENSMUST00000120196; ENSMUST00000184779; ENSMUST00000185084; ENSMUST00000184657; ENSMUST00000151573; ENSMUST00000208018	C2cd3	protein_coding	protein_coding	C2 calcium-dependent domain containing 3 [Source:MGI Symbol;Acc:MGI:2142166]	0.4938	2649	GO:0001701; GO:0030030; GO:0007420; GO:0016485; GO:0071539; GO:0060271; GO:0021915; GO:0042733; GO:1905515; GO:0007389; GO:0008589; GO:0001947; GO:0030326; GO:0030162; GO:0021997; GO:0061511	GO:0005515	GO:0005737; GO:0005856; GO:0042995; GO:0034451; GO:0005929; GO:0005814; GO:0005813; GO:0036064	C2CD3	277939	TRUE	-0.154336	0.000732294	0.0323348	chr7
ENSMUSG00000028964	ENSMUST00000030805; ENSMUST00000105675; ENSMUST00000105674; ENSMUST00000105676; ENSMUST00000105673; ENSMUST00000132265; ENSMUST00000128075; ENSMUST00000148626; ENSMUST00000134751; ENSMUST00000146184	Park7	protein_coding	protein_coding	Parkinson disease (autosomal recessive, early onset) 7 [Source:MGI Symbol;Acc:MGI:2135637]	0.5323	711	GO:0043066; GO:0010629; GO:0045944; GO:0051881; GO:0043524; GO:0008344; GO:0001933; GO:0016570; GO:0006508; GO:0006914; GO:0006281; GO:0006974; GO:0098869; GO:0006954; GO:0032757; GO:0031397; GO:0051899; GO:0060548; GO:0007005; GO:0007338; GO:0031334; GO:0033138; GO:0050821; GO:0034614; GO:0051091; GO:0006979; GO:0032091; GO:0034599; GO:0070301; GO:0060765; GO:0010628; GO:0006469; GO:2001237; GO:…	GO:0003729; GO:0044877; GO:0003723; GO:0005507; GO:0016787; GO:0008233; GO:0005102; GO:0005515; GO:0042802; GO:0042803; GO:0019900; GO:0140297; GO:0019899; GO:0003713; GO:0050681; GO:0097110; GO:1990381; GO:1903136; GO:0019955; GO:0045340; GO:0016684; GO:0051920; GO:0044390; GO:0044388; GO:0016532; GO:1903135; GO:0019826; GO:0036470; GO:0036478; GO:1990422	GO:0005739; GO:0005634; GO:0005829; GO:0005737; GO:0030424; GO:0000785; GO:0005654; GO:0045202; GO:0016020; GO:0005886; GO:0005783; GO:0048471; GO:0045121; GO:0061827; GO:0098793; GO:0016605; GO:0043005; GO:0044297; GO:0005758; GO:0005759	PARK7	57320	TRUE	0.142992	0.000736518	0.0323348	chr4
ENSMUSG00000023827	ENSMUST00000164143; ENSMUST00000024594; ENSMUST00000172259; ENSMUST00000167792; ENSMUST00000170858; ENSMUST00000167905	Agpat4	protein_coding	protein_coding	1-acylglycerol-3-phosphate O-acyltransferase 4 (lysophosphatidic acid acyltransferase, delta) [Source:MGI Symbol;Acc:MGI:1915512]	0.5331	923	GO:0006629; GO:0008654; GO:0016024; GO:0006644	GO:0016746; GO:0016740; GO:0003841; GO:0042171	GO:0016020; GO:0016021; GO:0005783; GO:0005789; GO:0012505; GO:0005741	AGPAT4	68262	TRUE	0.195107	0.000737965	0.0323348	chr17
ENSMUSG00000058833	ENSMUST00000135773; ENSMUST00000143598; ENSMUST00000133683; ENSMUST00000075175; ENSMUST00000136913; ENSMUST00000138196; ENSMUST00000132107; ENSMUST00000128620	Rex1bd	protein_coding	protein_coding	required for excision 1-B domain containing [Source:MGI Symbol;Acc:MGI:1913712]	0.6072	678	GO:0008150	GO:0003674	GO:0005575	REX1BD	66462	TRUE	0.226826	0.000740544	0.0323348	chr8
ENSMUSG00000037652	ENSMUST00000168645; ENSMUST00000046624; ENSMUST00000108255; ENSMUST00000152357; ENSMUST00000064718; ENSMUST00000177992; ENSMUST00000129817; ENSMUST00000124472; ENSMUST00000099163; ENSMUST00000150939	Phc3	protein_coding	protein_coding	polyhomeotic 3 [Source:MGI Symbol;Acc:MGI:2181434]	0.486	3935	GO:0045892	GO:0005515; GO:0008270; GO:0003677; GO:0046872; GO:0042393; GO:0003682	GO:0005634; GO:0005654; GO:0031519; GO:0035102	PHC3	241915	TRUE	-0.150318	0.000746313	0.0323348	chr3
ENSMUSG00000040481	ENSMUST00000057892; ENSMUST00000106763; ENSMUST00000106762; ENSMUST00000208369; ENSMUST00000147816; ENSMUST00000138443; ENSMUST00000133317; ENSMUST00000149486	Bptf	protein_coding	protein_coding	bromodomain PHD finger transcription factor [Source:MGI Symbol;Acc:MGI:2444008]	0.4939	5211	GO:0001892; GO:0045944; GO:0000122; GO:0006357; GO:0007420; GO:0006338; GO:0006355; GO:0007492; GO:0009952; GO:0010604; GO:0045935	GO:0005515; GO:0043565; GO:0046872; GO:0000978; GO:0035064; GO:0008094; GO:0008270; GO:0003677	GO:0005634; GO:0005737; GO:0000785; GO:0005654; GO:0048471; GO:0043005; GO:0030425; GO:0016589; GO:0044297; GO:1904949	BPTF	207165	TRUE	-0.212641	0.000746341	0.0323348	chr11
ENSMUSG00000038695	ENSMUST00000035844; ENSMUST00000206210; ENSMUST00000206887; ENSMUST00000117324; ENSMUST00000120852; ENSMUST00000134398; ENSMUST00000132952; ENSMUST00000118628; ENSMUST00000131817; ENSMUST00000118493; ENSMUST00000130220; ENSMUST00000136609; ENSMUST00000149341; ENSMUST00000136679; ENSMUST00000121922; ENSMUST00000208117; ENSMUST00000133656; ENSMUST00000155659; ENSMUST00000139097	Josd2	protein_coding	protein_coding	Josephin domain containing 2 [Source:MGI Symbol;Acc:MGI:1913374]	0.6089	790	GO:0016579; GO:0006508	GO:0004843; GO:0016787; GO:0008233	GO:0005575; GO:0005737; GO:0005829; GO:0016020; GO:0016021	JOSD2	66124	TRUE	0.241255	0.00074648	0.0323348	chr7
ENSMUSG00000038301	ENSMUST00000049152; ENSMUST00000155724; ENSMUST00000140560; ENSMUST00000137212; ENSMUST00000179365; ENSMUST00000114439; ENSMUST00000149024	Snx10	protein_coding	protein_coding	sorting nexin 10 [Source:MGI Symbol;Acc:MGI:1919232]	0.4509	2051	GO:1990830; GO:0015031; GO:0030030; GO:0006886; GO:0007032; GO:0051649; GO:0055074; GO:0071539; GO:0060271; GO:0044691; GO:0045453; GO:0006897; GO:0061512; GO:0019725; GO:0097178; GO:0001696; GO:0030316; GO:0046849; GO:0035630; GO:0016050	GO:0035091; GO:0008289; GO:0005545; GO:0051117; GO:1901981	GO:0005634; GO:0005737; GO:0016020; GO:0005783; GO:0005815; GO:0005856; GO:0005768; GO:0010008; GO:0030141; GO:0005813; GO:0090651; GO:0031313	SNX10	71982	TRUE	-0.187572	0.000749923	0.0323348	chr6
ENSMUSG00000030254	ENSMUST00000077088; ENSMUST00000113182; ENSMUST00000113180; ENSMUST00000068487; ENSMUST00000142079; ENSMUST00000132590; ENSMUST00000156063; ENSMUST00000135092	Rad18	protein_coding	protein_coding	RAD18 E3 ubiquitin protein ligase [Source:MGI Symbol;Acc:MGI:1890476]	0.4419	2159	GO:0006281; GO:0007283; GO:0006974; GO:0016567; GO:0060548; GO:0006513; GO:0051865; GO:0006301; GO:0051984; GO:0009411; GO:0045910	GO:0003677; GO:0005515; GO:0044877; GO:0016740; GO:0046872; GO:0061630; GO:0140678; GO:0042802; GO:0031593; GO:0003697; GO:0031625; GO:0000403	GO:0005634; GO:0016604; GO:0000785; GO:0005654; GO:0005737; GO:0005815; GO:0005856; GO:0005813; GO:0001673; GO:0042405; GO:0001741; GO:0005657; GO:0035861; GO:0097505	RAD18	58186	TRUE	-0.350016	0.000750343	0.0323348	chr6
ENSMUSG00000032554	ENSMUST00000112645; ENSMUST00000035158; ENSMUST00000190051; ENSMUST00000168142; ENSMUST00000170904; ENSMUST00000164377; ENSMUST00000112503; ENSMUST00000165296; ENSMUST00000126359	Trf	protein_coding	protein_coding	transferrin [Source:MGI Symbol;Acc:MGI:98821]	0.5225	1076	GO:0060395; GO:0009617; GO:0031643; GO:0006811; GO:0055072; GO:0006879; GO:0006826; GO:0019731; GO:0042327; GO:0070371; GO:0048260; GO:0034756; GO:0071281; GO:0045893; GO:0070447; GO:0030316; GO:0045780; GO:0007015; GO:2000147	GO:0005515; GO:0046872; GO:0008199; GO:0008198; GO:0034986; GO:1990459	GO:0005576; GO:0005886; GO:0005615; GO:0048471; GO:0009986; GO:0016324; GO:0005768; GO:0031410; GO:0055037; GO:0005769; GO:0005770; GO:0030139; GO:0031982; GO:0005604; GO:0009925; GO:0005905; GO:0051286; GO:0031232; GO:1990712; GO:0016020; GO:0045178; GO:0030120; GO:0097433	TF	22041	TRUE	0.267595	0.000750525	0.0323348	chr9
ENSMUSG00000031029	ENSMUST00000033342; ENSMUST00000153596; ENSMUST00000147369	Eif3f	protein_coding	protein_coding	eukaryotic translation initiation factor 3, subunit F [Source:MGI Symbol;Acc:MGI:1913335]	0.5001	1180	GO:0006413; GO:0006508; GO:0006412; GO:0016579; GO:0001732; GO:0002183; GO:0075522	GO:0005515; GO:0003743; GO:0008233; GO:0008237; GO:0031369; GO:0016787; GO:0008234; GO:0004843; GO:0042802; GO:0140492	GO:0005852; GO:0005737; GO:0016282; GO:0033290; GO:0071541	EIF3F	66085	TRUE	0.164371	0.000761429	0.0327078	chr7
ENSMUSG00000022865	ENSMUST00000232148; ENSMUST00000023572; ENSMUST00000114229; ENSMUST00000231356; ENSMUST00000232189; ENSMUST00000231251	Cxadr	protein_coding	protein_coding	coxsackie virus and adenovirus receptor [Source:MGI Symbol;Acc:MGI:1201679]	0.4762	1786	GO:0007005; GO:0055013; GO:0007507; GO:0060044; GO:0060038; GO:0031532; GO:0007155; GO:0051607; GO:0030593; GO:0034109; GO:0098609; GO:0007157; GO:0045216; GO:0070633; GO:0010669; GO:0008354; GO:0046629; GO:0060054; GO:0086067; GO:0086072; GO:0098904	GO:0005515; GO:0005102; GO:0042802; GO:0005178; GO:0050839; GO:0030165; GO:0008013; GO:0071253; GO:0086082	GO:0005737; GO:0005654; GO:0005634; GO:0016020; GO:0016021; GO:0005886; GO:0005615; GO:0032991; GO:0070161; GO:0016323; GO:0045121; GO:0005576; GO:0030426; GO:0030175; GO:0005911; GO:0030054; GO:0043005; GO:0005923; GO:0005912; GO:0031594; GO:0014704; GO:0044297; GO:0001669; GO:0016327	CXADR	13052	TRUE	-0.420476	0.000772002	0.0329192	chr16
ENSMUSG00000024498	ENSMUST00000237602; ENSMUST00000236088; ENSMUST00000025375; ENSMUST00000173642; ENSMUST00000237390; ENSMUST00000236418; ENSMUST00000236446; ENSMUST00000237646; ENSMUST00000236856; ENSMUST00000237901; ENSMUST00000237162	Tcerg1	protein_coding	protein_coding	transcription elongation regulator 1 (CA150) [Source:MGI Symbol;Acc:MGI:1926421]	0.4455	2013	GO:0045944; GO:0000122; GO:0006354; GO:0006351; GO:0008380; GO:0006397	GO:0005515; GO:0003712; GO:0003700; GO:0042802; GO:0061629; GO:0003714; GO:0070063; GO:0070064; GO:0044390	GO:0005654; GO:0005634	TCERG1	56070	TRUE	-0.187923	0.000772703	0.0329192	chr18
ENSMUSG00000022533	ENSMUST00000061350; ENSMUST00000100013; ENSMUST00000229503; ENSMUST00000229750; ENSMUST00000149882; ENSMUST00000153656; ENSMUST00000229616; ENSMUST00000136065	Atp13a3	protein_coding	protein_coding	ATPase type 13A3 [Source:MGI Symbol;Acc:MGI:2685387]	0.4312	2537	GO:0006812; GO:0034220; GO:0098655; GO:0055085; GO:0006874; GO:0015847; GO:1902047	GO:0019829; GO:0140358; GO:0005524; GO:0046872; GO:0000166; GO:0016887; GO:0015417; GO:0015594	GO:0016021; GO:0016020; GO:0031901; GO:0005768; GO:0031902; GO:0055038	ATP13A3	224088	TRUE	-0.230042	0.000773133	0.0329192	chr16
ENSMUSG00000029823	ENSMUST00000163047; ENSMUST00000161538; ENSMUST00000057692; ENSMUST00000162386; ENSMUST00000163012; ENSMUST00000162718; ENSMUST00000160922; ENSMUST00000161227; ENSMUST00000160582; ENSMUST00000159936; ENSMUST00000160511; ENSMUST00000162530; ENSMUST00000160430	Luc7l2	protein_coding	protein_coding	LUC7-like 2 (S. cerevisiae) [Source:MGI Symbol;Acc:MGI:2183260]	0.4275	2648	GO:0006376	GO:0003729; GO:0019899	GO:0005685; GO:0005634; GO:0005654; GO:0016607; GO:0071004	LUC7L2	192196	TRUE	-0.159908	0.000780341	0.0331292	chr6
ENSMUSG00000025982	ENSMUST00000027127; ENSMUST00000190175; ENSMUST00000185429; ENSMUST00000187500; ENSMUST00000188859; ENSMUST00000191303; ENSMUST00000189051; ENSMUST00000188419	Sf3b1	protein_coding	protein_coding	splicing factor 3b, subunit 1 [Source:MGI Symbol;Acc:MGI:1932339]	0.4049	2410	GO:0000245; GO:0000398; GO:0045945	GO:0003729; GO:0003723; GO:1990935	GO:0005634; GO:0005681; GO:0005684; GO:0005686; GO:0005689; GO:0016607; GO:0034693; GO:0071005; GO:0071013; GO:0110016	SF3B1	81898	TRUE	-0.137572	0.000792561	0.0333941	chr1
ENSMUSG00000035247	ENSMUST00000042052; ENSMUST00000179265; ENSMUST00000218626; ENSMUST00000220098; ENSMUST00000217804	Hectd1	protein_coding	protein_coding	HECT domain E3 ubiquitin protein ligase 1 [Source:MGI Symbol;Acc:MGI:2384768]	0.4246	4983	GO:0016567; GO:0006511; GO:0019538; GO:0001892; GO:0000209; GO:0001843; GO:0043161; GO:0072659; GO:0035904; GO:0051865; GO:0003281; GO:1903077; GO:0070534; GO:0001779; GO:0048856; GO:0003170; GO:0060708; GO:0060707	GO:0005515; GO:0046872; GO:0004842; GO:0016740; GO:0061630	GO:0016607	HECTD1	207304	TRUE	-0.133231	0.000792911	0.0333941	chr12
ENSMUSG00000019432	ENSMUST00000068056; ENSMUST00000174757; ENSMUST00000174164; ENSMUST00000173731; ENSMUST00000174795; ENSMUST00000172549	Ddx39b	protein_coding	protein_coding	DEAD box helicase 39b [Source:MGI Symbol;Acc:MGI:99240]	0.5522	1594	GO:0045727; GO:0006406; GO:0008380; GO:0032786; GO:0046784; GO:0006397; GO:0000398; GO:0051028; GO:0000245; GO:0061051; GO:2000573; GO:1904707; GO:0010501; GO:2000002	GO:0005524; GO:0003676; GO:0003724; GO:0044877; GO:0016787; GO:0000166; GO:0003723; GO:0004386; GO:0042802; GO:0016887; GO:0008186; GO:0043008; GO:0017070; GO:0030621	GO:0005634; GO:0016607; GO:0005737; GO:0005681; GO:0032991; GO:0000346; GO:0016363; GO:0005687; GO:0005688	DDX39B	53817	TRUE	0.152001	0.000793459	0.0333941	chr17
ENSMUSG00000033450	ENSMUST00000036370; ENSMUST00000226153	Tagap	protein_coding	protein_coding	T cell activation Rho GTPase activating protein [Source:MGI Symbol;Acc:MGI:3615484]	0.4272	1545	GO:0007165; GO:0050790; GO:0051607	GO:0005085; GO:0005096		TAGAP	72536	TRUE	0.945593	0.000800303	0.033585	chr17
ENSMUSG00000022219	ENSMUST00000001497; ENSMUST00000136270	Cideb	protein_coding	protein_coding	cell death-inducing DNA fragmentation factor, alpha subunit-like effector B [Source:MGI Symbol;Acc:MGI:1270844]	0.537	1050	GO:0006915; GO:0010942; GO:0042981; GO:0097202; GO:0090200; GO:0097194	GO:0042802	GO:0005829; GO:0048471	CIDEB	12684	TRUE	0.432878	0.000807172	0.033776	chr14
ENSMUSG00000034566	ENSMUST00000141474; ENSMUST00000137563; ENSMUST00000106537; ENSMUST00000043931; ENSMUST00000073791; ENSMUST00000180072; ENSMUST00000137754; ENSMUST00000138779	Atp5h	protein_coding	protein_coding	ATP synthase, H+ transporting, mitochondrial F0 complex, subunit D [Source:MGI Symbol;Acc:MGI:1918929]	0.4917	588	GO:0015986; GO:0006811; GO:1902600; GO:0046034; GO:0042776	GO:0015078; GO:0044877; GO:0046933	GO:0000276; GO:0005739; GO:0016020; GO:0005743; GO:0045263; GO:0043209; GO:0005753; GO:0000274	ATP5PD	71679	TRUE	0.19241	0.000814063	0.0339423	chr11
ENSMUSG00000020099	ENSMUST00000077925; ENSMUST00000218316; ENSMUST00000218637	Unc5b	protein_coding	protein_coding	unc-5 netrin receptor B [Source:MGI Symbol;Acc:MGI:894703]	0.5881	5078	GO:0007165; GO:0043524; GO:0006915; GO:0001525; GO:2001240; GO:0007411; GO:0038007; GO:0014068; GO:0033564; GO:2001241	GO:0005515; GO:0005042	GO:0016020; GO:0016021; GO:0005886; GO:0045121; GO:0005829	UNC5B	107449	TRUE	0.28154	0.00081805	0.0339423	chr10
ENSMUSG00000037876	ENSMUST00000174062; ENSMUST00000173295; ENSMUST00000174317; ENSMUST00000174408; ENSMUST00000051446; ENSMUST00000219563; ENSMUST00000173661; ENSMUST00000173689; ENSMUST00000173949; ENSMUST00000173187; ENSMUST00000173762; ENSMUST00000173236	Jmjd1c	protein_coding	protein_coding	jumonji domain containing 1C [Source:MGI Symbol;Acc:MGI:1918614]	0.4318	3910	GO:0033169; GO:0003382; GO:0006357; GO:0006354; GO:0006325; GO:0072520; GO:0008584; GO:0098727; GO:0036098	GO:0032454; GO:0046872; GO:0016491; GO:0051213; GO:0003712; GO:0031490	GO:0005634; GO:0000118; GO:0000785	JMJD1C	108829	TRUE	-0.196273	0.000818139	0.0339423	chr10
ENSMUSG00000026933	ENSMUST00000114167; ENSMUST00000091268; ENSMUST00000143977; ENSMUST00000183461; ENSMUST00000134970; ENSMUST00000148146; ENSMUST00000134882; ENSMUST00000134054; ENSMUST00000151593; ENSMUST00000142028; ENSMUST00000139937; ENSMUST00000127823	Camsap1	protein_coding	protein_coding	calmodulin regulated spectrin-associated protein 1 [Source:MGI Symbol;Acc:MGI:3036242]	0.529	2803	GO:0031175; GO:0000226; GO:0007010; GO:0022604; GO:0031113; GO:0007026; GO:0031122	GO:0005515; GO:0005516; GO:0008017; GO:0030507; GO:0051011	GO:0005737; GO:0005856; GO:0005874; GO:0036449	CAMSAP1	227634	TRUE	-0.138136	0.000835077	0.0345466	chr2
ENSMUSG00000056553	ENSMUST00000185505; ENSMUST00000189009; ENSMUST00000190247; ENSMUST00000191106; ENSMUST00000070733	Ptprn2	protein_coding	protein_coding	protein tyrosine phosphatase, receptor type, N polypeptide 2 [Source:MGI Symbol;Acc:MGI:107418]	0.5307	2946	GO:0006470; GO:0016311; GO:0006629; GO:0034260; GO:0035773; GO:0007269; GO:0051046	GO:0004725; GO:0016791; GO:0016787; GO:0004721; GO:0005515	GO:0016020; GO:0016021; GO:0030141; GO:0005737; GO:0031410; GO:0045202; GO:0030672; GO:0043195; GO:0030658; GO:0005788; GO:0043235; GO:0030285; GO:0030667	PTPRN2	19276	TRUE	-0.227607	0.000842031	0.0346692	chr12
ENSMUSG00000034714	ENSMUST00000045779; ENSMUST00000141111	Ttyh2	protein_coding	protein_coding	tweety family member 2 [Source:MGI Symbol;Acc:MGI:2157091]	0.5864	2090	GO:0006811; GO:1902476; GO:0006821	GO:0005254; GO:0005229; GO:0072320	GO:0016021; GO:0016020; GO:0005886; GO:0034707	TTYH2	117160	TRUE	0.193982	0.000842803	0.0346692	chr11
ENSMUSG00000024608	ENSMUST00000236652; ENSMUST00000235966; ENSMUST00000235603; ENSMUST00000025511; ENSMUST00000236441; ENSMUST00000142980; ENSMUST00000118551; ENSMUST00000127568; ENSMUST00000137400; ENSMUST00000122279	Rps14	protein_coding	protein_coding	ribosomal protein S14 [Source:MGI Symbol;Acc:MGI:98107]	0.5455	631	GO:0006412; GO:0000028; GO:0030218; GO:0000122; GO:0000462; GO:0006417; GO:0002181; GO:0030490	GO:0003735; GO:0045182; GO:0003723; GO:0070181; GO:0048027	GO:0005840; GO:1990904; GO:0005739; GO:0005730; GO:0014069; GO:0005737; GO:0022627; GO:0005829; GO:0022626	RPS14	20044	TRUE	0.197039	0.000845367	0.0346767	chr18
ENSMUSG00000037270	ENSMUST00000198742; ENSMUST00000057272; ENSMUST00000136287; ENSMUST00000123916; ENSMUST00000152881; ENSMUST00000108145; ENSMUST00000152564; ENSMUST00000129721; ENSMUST00000211820; ENSMUST00000129787; ENSMUST00000128061; ENSMUST00000143675; ENSMUST00000139219; ENSMUST00000146948; ENSMUST00000141740; ENSMUST00000138950; ENSMUST00000138152; ENSMUST00000140480; ENSMUST00000195933; ENSMUST00000148698;…	4932438A13Rik	protein_coding	protein_coding	RIKEN cDNA 4932438A13 gene [Source:MGI Symbol;Acc:MGI:2444631]	0.4077	4403	GO:0006909; GO:0001558; GO:0006629; GO:0007283; GO:0016197; GO:0019915; GO:0032456; GO:0045444; GO:0048488; GO:0051647; GO:0060612; GO:0006113	GO:0003674	GO:0016020; GO:0016021; GO:0098793; GO:0005634			TRUE	-0.245904	0.000851737	0.0347214	chr3
ENSMUSG00000072772	ENSMUST00000129823; ENSMUST00000004389; ENSMUST00000140423; ENSMUST00000137318	Grcc10	protein_coding	protein_coding	gene rich cluster, C10 gene [Source:MGI Symbol;Acc:MGI:1315201]	0.5562	863	GO:0009791; GO:0048593; GO:0050890; GO:0021540; GO:0014819; GO:0021678; GO:0036343	GO:0003674	GO:0016607; GO:0005737	C12orf57	14790	TRUE	0.233083	0.000852883	0.0347214	chr6
ENSMUSG00000032468	ENSMUST00000035043; ENSMUST00000185524; ENSMUST00000186049; ENSMUST00000191370	Armc8	protein_coding	protein_coding	armadillo repeat containing 8 [Source:MGI Symbol;Acc:MGI:1921375]	0.4177	2642	GO:0043161	GO:0005515; GO:0003674	GO:0005634; GO:0005737; GO:0000151; GO:0005654; GO:0005829; GO:0043231; GO:0034657	ARMC8	74125	TRUE	-0.185045	0.000855935	0.0347214	chr9
ENSMUSG00000061080	ENSMUST00000189229; ENSMUST00000187695; ENSMUST00000189358; ENSMUST00000191610; ENSMUST00000189829; ENSMUST00000078873; ENSMUST00000099761; ENSMUST00000187185; ENSMUST00000145951; ENSMUST00000133853	Lsamp	protein_coding	protein_coding	limbic system-associated membrane protein [Source:MGI Symbol;Acc:MGI:1261760]	0.4526	2386	GO:0007155; GO:0035641		GO:0016020; GO:0016021; GO:0005829; GO:0005886; GO:0031225	LSAMP	268890	TRUE	-0.144968	0.000857327	0.0347214	chr16
ENSMUSG00000033228	ENSMUST00000228072; ENSMUST00000047835; ENSMUST00000227069; ENSMUST00000228535; ENSMUST00000228260; ENSMUST00000227133	Scaf11	protein_coding	protein_coding	SR-related CTD-associated factor 11 [Source:MGI Symbol;Acc:MGI:1919443]	0.4431	3201	GO:0000245; GO:0000375; GO:0008380	GO:0046872	GO:0005730; GO:0016604; GO:0005654	SCAF11	72193	TRUE	-0.144162	0.000858379	0.0347214	chr15
ENSMUSG00000030876	ENSMUST00000033163; ENSMUST00000207332; ENSMUST00000207351; ENSMUST00000207835	Mettl9	protein_coding	protein_coding	methyltransferase like 9 [Source:MGI Symbol;Acc:MGI:1914862]	0.4484	1468	GO:0032259; GO:0006479	GO:0106370; GO:0016740; GO:0008168	GO:0005783; GO:0005739	METTL9	59052	TRUE	0.192942	0.000860914	0.0347275	chr7
ENSMUSG00000024974	ENSMUST00000025930; ENSMUST00000157053; ENSMUST00000171083	Smc3	protein_coding	protein_coding	structural maintenance of chromosomes 3 [Source:MGI Symbol;Acc:MGI:1339795]	0.3937	2006	GO:0051276; GO:0019827; GO:0006281; GO:0006974; GO:0051321; GO:0007049; GO:0051301; GO:0006275; GO:0090307; GO:0007062; GO:0007064	GO:0005515; GO:0005524; GO:0003682; GO:0000166; GO:0016887; GO:0046982; GO:0003690; GO:0070840; GO:0048487; GO:0036033; GO:0061775	GO:0005694; GO:0005634; GO:0000785; GO:0005654; GO:0000775; GO:0016363; GO:0000800; GO:0044815; GO:0005604; GO:0097431; GO:0030893; GO:0008278; GO:0030892	SMC3	13006	TRUE	-0.146152	0.000869837	0.0349205	chr19
ENSMUSG00000041355	ENSMUST00000192688; ENSMUST00000193069; ENSMUST00000194604; ENSMUST00000195014; ENSMUST00000193934; ENSMUST00000192495; ENSMUST00000035785	Ssr2	protein_coding	protein_coding	signal sequence receptor, beta [Source:MGI Symbol;Acc:MGI:1913506]	0.5324	712	GO:0001701	GO:0003674	GO:0016020; GO:0016021; GO:0005783; GO:0005789	SSR2	66256	TRUE	0.176407	0.000871863	0.0349205	chr3
ENSMUSG00000039278	ENSMUST00000041096	Pcsk1n	protein_coding	protein_coding	proprotein convertase subtilisin/kexin type 1 inhibitor [Source:MGI Symbol;Acc:MGI:1353431]	0.5727	2193	GO:0010951; GO:0007218; GO:0002021; GO:0016486; GO:0009409	GO:0004866; GO:0004867	GO:0005794; GO:0005615; GO:0005576; GO:0030141; GO:0005802	PCSK1N	30052	TRUE	0.206758	0.000872892	0.0349205	chrX
ENSMUSG00000035783	ENSMUST00000039631; ENSMUST00000238147	Acta2	protein_coding	protein_coding	actin alpha 2, smooth muscle, aorta [Source:MGI Symbol;Acc:MGI:87909]	0.5015	1430	GO:0008217; GO:0070374; GO:0006936; GO:0010628; GO:0014829; GO:2000491; GO:0009615; GO:0061041; GO:0061870; GO:0061874; GO:0072144; GO:0090131	GO:0005515; GO:0000166; GO:0005524; GO:0019901	GO:0005737; GO:0005856; GO:0031514; GO:0005869; GO:0015629; GO:0005604; GO:0001725; GO:0030485; GO:0030027; GO:0030175; GO:0032991; GO:0044297	ACTA2	11475	TRUE	0.473326	0.000879084	0.035012	chr19
ENSMUSG00000019865	ENSMUST00000191238; ENSMUST00000187449; ENSMUST00000188021; ENSMUST00000190114; ENSMUST00000186175; ENSMUST00000020015; ENSMUST00000186382; ENSMUST00000190751	Nmbr	protein_coding	protein_coding	neuromedin B receptor [Source:MGI Symbol;Acc:MGI:1100525]	0.459	900	GO:0008150; GO:0007186; GO:0140374; GO:0007165; GO:0031989; GO:0007218; GO:0032715; GO:0032727; GO:0090290; GO:0160023; GO:1903942	GO:0003674; GO:0004930; GO:0004946; GO:0008528; GO:0008188	GO:0005575; GO:0016021; GO:0016020; GO:0005829; GO:0005886; GO:0005887	NMBR	18101	TRUE	-0.802481	0.000879989	0.035012	chr10
ENSMUSG00000049517	ENSMUST00000051955; ENSMUST00000224463; ENSMUST00000224430	Rps23	protein_coding	protein_coding	ribosomal protein S23 [Source:MGI Symbol;Acc:MGI:1913725]	0.4669	681	GO:0006412; GO:0002181; GO:0034063; GO:1990145	GO:0003735; GO:0005515	GO:0005840; GO:0005829; GO:0005737; GO:0005783; GO:1990904; GO:0045202; GO:0015935; GO:0005791; GO:0022627; GO:0022626; GO:0042788	RPS23	66475	TRUE	0.178691	0.000884223	0.0350846	chr13
ENSMUSG00000026435	ENSMUST00000177943; ENSMUST00000027695; ENSMUST00000190322; ENSMUST00000185387	Slc45a3	protein_coding	protein_coding	solute carrier family 45, member 3 [Source:MGI Symbol;Acc:MGI:1922082]	0.5715	2059	GO:0055085; GO:0015770; GO:0010907; GO:0045723; GO:0048713	GO:0022857; GO:0008506	GO:0016020; GO:0016021	SLC45A3	212980	TRUE	0.619775	0.000889514	0.035136	chr1
ENSMUSG00000027692	ENSMUST00000160934; ENSMUST00000159236; ENSMUST00000161214; ENSMUST00000161234; ENSMUST00000162037; ENSMUST00000160307; ENSMUST00000159680; ENSMUST00000195094; ENSMUST00000160518; ENSMUST00000162485; ENSMUST00000159308; ENSMUST00000162777; ENSMUST00000161964; ENSMUST00000161423; ENSMUST00000193721; ENSMUST00000162225; ENSMUST00000159733; ENSMUST00000192205	Tnik	protein_coding	protein_coding	TRAF2 and NCK interacting kinase [Source:MGI Symbol;Acc:MGI:1916264]	0.4907	3495	GO:0006468; GO:0016310; GO:0007399; GO:0016055; GO:0031532; GO:0035556; GO:0001934; GO:0046777; GO:0030033; GO:0072659; GO:0007010; GO:0050775; GO:0046330; GO:0048814; GO:0000165; GO:0098696; GO:0043408; GO:0048812; GO:0010243	GO:0004672; GO:0005524; GO:0000166; GO:0004674; GO:0016740; GO:0016301; GO:0005515; GO:0106310	GO:0005634; GO:0005829; GO:0005737; GO:0005654; GO:0048471; GO:0016324; GO:0005856; GO:0005768; GO:0055037; GO:0098978; GO:0099092; GO:0098793	TNIK	665113	TRUE	-0.235244	0.000890919	0.035136	chr3
ENSMUSG00000027177	ENSMUST00000028600; ENSMUST00000111124; ENSMUST00000111125; ENSMUST00000132622	Hipk3	protein_coding	protein_coding	homeodomain interacting protein kinase 3 [Source:MGI Symbol;Acc:MGI:1314882]	0.4783	4020	GO:0006468; GO:0043066; GO:0016310; GO:0018108; GO:0018105; GO:0006915; GO:0000122; GO:0018107; GO:0043388; GO:0009299; GO:0043508	GO:0005524; GO:0004672; GO:0016740; GO:0000166; GO:0016301; GO:0005515; GO:0004674; GO:0106310; GO:0004713; GO:0003714	GO:0005829; GO:0016604; GO:0005634; GO:0005737; GO:0005886; GO:0016605	HIPK3	15259	TRUE	-0.200311	0.000892758	0.035136	chr2
ENSMUSG00000027797	ENSMUST00000196745; ENSMUST00000167204; ENSMUST00000054237; ENSMUST00000200348; ENSMUST00000198154; ENSMUST00000197870; ENSMUST00000198757; ENSMUST00000199585; ENSMUST00000070418; ENSMUST00000198412; ENSMUST00000199169; ENSMUST00000199702; ENSMUST00000198437; ENSMUST00000200352; ENSMUST00000198821	Dclk1	protein_coding	protein_coding	doublecortin-like kinase 1 [Source:MGI Symbol;Acc:MGI:1330861]	0.4701	3518	GO:0035556; GO:0006468; GO:0001764; GO:0035082; GO:0060041; GO:0048675; GO:0016310; GO:0007399; GO:0030154; GO:0007420; GO:0048813; GO:0030900; GO:0007409; GO:1900181; GO:0021952; GO:0034504; GO:0018105; GO:0048812; GO:0009615	GO:0005524; GO:0004672; GO:0000166; GO:0008017; GO:0016740; GO:0016301; GO:0004674; GO:0106310	GO:0043005; GO:0014069; GO:0030424; GO:0030426; GO:0005737; GO:0042995	DCLK1	13175	TRUE	-0.15247	0.000896021	0.0351694	chr3
ENSMUSG00000036792	ENSMUST00000112745; ENSMUST00000154653; ENSMUST00000112754; ENSMUST00000142250; ENSMUST00000148796; ENSMUST00000127085; ENSMUST00000147055; ENSMUST00000147023; ENSMUST00000047413; ENSMUST00000199257; ENSMUST00000122841; ENSMUST00000132717; ENSMUST00000196045; ENSMUST00000197712; ENSMUST00000196831	Mbd5	protein_coding	protein_coding	methyl-CpG binding domain protein 5 [Source:MGI Symbol;Acc:MGI:2138934]	0.4355	2628	GO:0042593; GO:0007399; GO:0040014; GO:0050795; GO:0060399	GO:0003677; GO:0003682	GO:0005634; GO:0005654; GO:0005694; GO:0030496; GO:0010369	MBD5	109241	TRUE	-0.164754	0.000916456	0.0357888	chr2
ENSMUSG00000022350	ENSMUST00000227725; ENSMUST00000022976	Washc5	protein_coding	protein_coding	WASH complex subunit 5 [Source:MGI Symbol;Acc:MGI:2146110]	0.4672	3326	GO:0042632; GO:0010976; GO:0015031; GO:0006909; GO:0006887; GO:0016197; GO:0001556; GO:0030041; GO:0007040; GO:0031503; GO:0007032; GO:0097494; GO:0034315; GO:0040038; GO:0051125; GO:0140285; GO:0043933; GO:0090306	GO:0042802	GO:0071203; GO:0005737; GO:0005654; GO:0005783; GO:0005829; GO:0043005; GO:0043025; GO:0005768; GO:0005769; GO:0031901	WASHC5	223593	TRUE	-0.175364	0.000918726	0.0357888	chr15
ENSMUSG00000027175	ENSMUST00000129571; ENSMUST00000111118; ENSMUST00000028597; ENSMUST00000129792; ENSMUST00000137428; ENSMUST00000126310; ENSMUST00000132600	Tcp11l1	protein_coding	protein_coding	t-complex 11 like 1 [Source:MGI Symbol;Acc:MGI:2444263]	0.5104	1877	GO:0007165	GO:0003674	GO:0005874	TCP11L1	320554	TRUE	-0.275313	0.000919173	0.0357888	chr2
ENSMUSG00000037236	ENSMUST00000235769; ENSMUST00000236860; ENSMUST00000166793; ENSMUST00000237780; ENSMUST00000236507; ENSMUST00000235960; ENSMUST00000236327; ENSMUST00000237018; ENSMUST00000237061; ENSMUST00000237365; ENSMUST00000235199; ENSMUST00000237744; ENSMUST00000236276; ENSMUST00000235851; ENSMUST00000235581; ENSMUST00000237002; ENSMUST00000237622; ENSMUST00000235551	Matr3	protein_coding	protein_coding	matrin 3 [Source:MGI Symbol;Acc:MGI:1298379]	0.4232	1820	GO:0010608; GO:0002376; GO:0045087; GO:0003281; GO:0001825; GO:0002218; GO:0003170	GO:0008270; GO:0003723; GO:0003676; GO:0035198; GO:0046872; GO:0042802	GO:0005634; GO:0005737; GO:0016363	MATR3	17184	TRUE	-0.171801	0.000936954	0.0361552	chr18
ENSMUSG00000015850	ENSMUST00000117782; ENSMUST00000015994; ENSMUST00000151054; ENSMUST00000124410; ENSMUST00000148854	Adamtsl4	protein_coding	protein_coding	ADAMTS-like 4 [Source:MGI Symbol;Acc:MGI:2389008]	0.6085	1807	GO:0006915; GO:0043065; GO:0030198; GO:0002064; GO:0070285	GO:0002020; GO:0042802	GO:0005576; GO:0031012; GO:0005614	ADAMTSL4	229595	TRUE	0.312144	0.000938677	0.0361552	chr3
ENSMUSG00000051159	ENSMUST00000050551; ENSMUST00000101336; ENSMUST00000134887; ENSMUST00000130589; ENSMUST00000136277	Cited1	protein_coding	protein_coding	Cbp/p300-interacting transactivator with Glu/Asp-rich carboxy-terminal domain 1 [Source:MGI Symbol;Acc:MGI:108023]	0.599	696	GO:0006355; GO:0060395; GO:0060711; GO:0045944; GO:0043524; GO:0007179; GO:0042981; GO:0043627; GO:0045893; GO:0030154; GO:0006915; GO:0045892; GO:0001570; GO:0006913; GO:0042438; GO:0007420; GO:0010628; GO:0045668; GO:0032496; GO:0001890; GO:0051591; GO:0032868; GO:0071559; GO:0060712; GO:0034341; GO:0030318; GO:0043473; GO:0000578; GO:0070741; GO:0034097; GO:0003340; GO:0070555; GO:0070669; GO:…	GO:0005515; GO:0042803; GO:0003682; GO:0003713; GO:0008022; GO:0070410; GO:0050693	GO:0005634; GO:0005829; GO:0005737	CITED1	12705	TRUE	0.374378	0.000940757	0.0361552	chrX
ENSMUSG00000020935	ENSMUST00000021313; ENSMUST00000134335; ENSMUST00000155490; ENSMUST00000152965; ENSMUST00000126365	Dcakd	protein_coding	protein_coding	dephospho-CoA kinase domain containing [Source:MGI Symbol;Acc:MGI:1915337]	0.5329	954	GO:0015937	GO:0005524; GO:0004140; GO:0000166	GO:0005739	DCAKD	68087	TRUE	0.240636	0.000941145	0.0361552	chr11
ENSMUSG00000103800	ENSMUST00000194038	Pcdha8	protein_coding	protein_coding	protocadherin alpha 8 [Source:MGI Symbol;Acc:MGI:2681879]	0.4755	5338	GO:0007156; GO:0007155	GO:0005509; GO:0003674	GO:0016020; GO:0005886; GO:0016021; GO:0005887	PCDHA9	353235	TRUE	-1.4395	0.00094293	0.0361552	chr18
ENSMUSG00000026667	ENSMUST00000150821; ENSMUST00000027979; ENSMUST00000123399	Uhmk1	protein_coding	protein_coding	U2AF homology motif (UHM) kinase 1 [Source:MGI Symbol;Acc:MGI:1341908]	0.4363	7772	GO:0006468; GO:0051726; GO:0016310; GO:0018105; GO:0046777; GO:0046825; GO:0045948; GO:0031175	GO:0003723; GO:0005524; GO:0004672; GO:0003676; GO:0004674; GO:0016740; GO:0000166; GO:0016301; GO:0005515; GO:0106310; GO:0019899; GO:0043021; GO:1990935	GO:0005634; GO:0016607; GO:0005737; GO:0005654; GO:0043231; GO:0030424; GO:0071598; GO:0032839	UHMK1	16589	TRUE	-0.163303	0.000943481	0.0361552	chr1
ENSMUSG00000040997	ENSMUST00000180359; ENSMUST00000199338; ENSMUST00000041197; ENSMUST00000239403; ENSMUST00000197802; ENSMUST00000196699; ENSMUST00000197605; ENSMUST00000199068; ENSMUST00000197807	Abhd4	protein_coding	protein_coding	abhydrolase domain containing 4 [Source:MGI Symbol;Acc:MGI:1915938]	0.531	1266	GO:0006629; GO:0016042; GO:0055088; GO:0070292; GO:0006654; GO:0070291	GO:0016787; GO:0004622; GO:0052689; GO:0042171	GO:0005739; GO:0005811	ABHD4	105501	TRUE	0.223445	0.000951449	0.0363648	chr14
ENSMUSG00000000247	ENSMUST00000143783; ENSMUST00000149664; ENSMUST00000133661; ENSMUST00000000253; ENSMUST00000176229; ENSMUST00000155964; ENSMUST00000175896	Lhx2	protein_coding	protein_coding	LIM homeobox protein 2 [Source:MGI Symbol;Acc:MGI:96785]	0.6015	1157	GO:0006355; GO:0048731; GO:0045944; GO:0022008; GO:0060041; GO:0048675; GO:0030182; GO:0001942; GO:0006357; GO:0045893; GO:0007420; GO:0007399; GO:0001843; GO:0021772; GO:0021987; GO:0007411; GO:0009953; GO:0045199; GO:0045814; GO:0048646; GO:2000179; GO:2000678; GO:0007498; GO:0021537; GO:0021978; GO:0050768	GO:0003677; GO:0000981; GO:0046872; GO:0000978; GO:0001228; GO:0043565; GO:0005515; GO:0003682; GO:0000977	GO:0005634; GO:0005654	LHX2	16870	TRUE	-0.426547	0.000954946	0.0363758	chr2
ENSMUSG00000035048	ENSMUST00000190279; ENSMUST00000188398; ENSMUST00000038673; ENSMUST00000186693; ENSMUST00000190354	Anapc13	protein_coding	protein_coding	anaphase promoting complex subunit 13 [Source:MGI Symbol;Acc:MGI:1916260]	0.5124	707	GO:0016567; GO:0007049; GO:0051301; GO:0070979	GO:0003674	GO:0005680; GO:0005634	ANAPC13	69010	TRUE	0.212605	0.000957098	0.0363758	chr9
ENSMUSG00000036712	ENSMUST00000043526; ENSMUST00000211554; ENSMUST00000209532; ENSMUST00000209742; ENSMUST00000209559; ENSMUST00000209206; ENSMUST00000109626; ENSMUST00000098519; ENSMUST00000209722; ENSMUST00000210302; ENSMUST00000211671	Cyld	protein_coding	protein_coding	CYLD lysine 63 deubiquitinase [Source:MGI Symbol;Acc:MGI:1921506]	0.4192	4997	GO:0006511; GO:0016579; GO:0006508; GO:0016055; GO:0002376; GO:0045087; GO:0007346; GO:0010803; GO:0032088; GO:0046329; GO:0050727; GO:0060544; GO:0070507; GO:0070536; GO:0090090; GO:1901223; GO:1903753; GO:1990108; GO:2001238; GO:2001242; GO:0045577; GO:0048872; GO:0043393; GO:0045582; GO:0071108; GO:0050728; GO:0070266; GO:0050862; GO:0050856; GO:1903829; GO:0043369; GO:1902017; GO:1901026; GO:…	GO:0004843; GO:0016787; GO:0008233; GO:0008234; GO:0008270; GO:0019901; GO:0061578; GO:0070064; GO:0005515; GO:0046872; GO:1990380	GO:0016020; GO:0005886; GO:0005815; GO:0042995; GO:0048471; GO:0005819; GO:0005813; GO:0005829; GO:0005881; GO:0030496; GO:0031234; GO:0005737; GO:0005856; GO:0005874; GO:0036064; GO:0097542	CYLD	74256	TRUE	-0.160792	0.000960534	0.0363758	chr8
ENSMUSG00000034275	ENSMUST00000214357; ENSMUST00000115247; ENSMUST00000214187	Igsf9b	protein_coding	protein_coding	immunoglobulin superfamily, member 9B [Source:MGI Symbol;Acc:MGI:2685354]	0.5633	7096		GO:0005515	GO:0016020; GO:0016021; GO:0098982; GO:0099629	IGSF9B	235086	TRUE	-0.29926	0.000963491	0.0363758	chr9
ENSMUSG00000061393	ENSMUST00000165044; ENSMUST00000035093; ENSMUST00000215746; ENSMUST00000217621; ENSMUST00000213389; ENSMUST00000213431	Acvr2b	protein_coding	protein_coding	activin receptor IIB [Source:MGI Symbol;Acc:MGI:87912]	0.593	1442	GO:0006468; GO:0030324; GO:0030073; GO:0009791; GO:0030509; GO:0000122; GO:0045669; GO:0007507; GO:0001501; GO:0016310; GO:0010033; GO:0001822; GO:0048705; GO:0060021; GO:0006355; GO:0009952; GO:0007165; GO:0120163; GO:0007178; GO:0007368; GO:0032147; GO:0009749; GO:0031016; GO:0007389; GO:0042475; GO:0030501; GO:0035265; GO:0001946; GO:0001974; GO:0060836; GO:0060840; GO:0060841; GO:0061298; GO:…	GO:0005524; GO:0004675; GO:0004672; GO:0005515; GO:0016740; GO:0046872; GO:0000166; GO:0016301; GO:0004674; GO:0019838; GO:0048185; GO:0004712; GO:0017002; GO:0034711	GO:0016020; GO:0005737; GO:0016021; GO:0005886; GO:0032991; GO:0043235; GO:0048179	ACVR2B	11481	TRUE	-0.347792	0.000964227	0.0363758	chr9
ENSMUSG00000052146	ENSMUST00000114882; ENSMUST00000025052; ENSMUST00000114881; ENSMUST00000178774; ENSMUST00000155071; ENSMUST00000150763; ENSMUST00000145226; ENSMUST00000152982	Rps10	protein_coding	protein_coding	ribosomal protein S10 [Source:MGI Symbol;Acc:MGI:1914347]	0.5713	714	GO:0002181	GO:0003735; GO:0003723; GO:0000049	GO:0005730; GO:0005829; GO:0005634; GO:0005737; GO:0005840; GO:1990904; GO:0022627; GO:0022626	RPS10	67097	TRUE	0.188465	0.000971756	0.0365035	chr17
ENSMUSG00000041272	ENSMUST00000039987; ENSMUST00000125974; ENSMUST00000147657; ENSMUST00000150082	Tox	protein_coding	protein_coding	thymocyte selection-associated high mobility group box [Source:MGI Symbol;Acc:MGI:2181659]	0.452	2327	GO:0006357; GO:0007399; GO:0006325; GO:0021895; GO:0010976; GO:1901537; GO:0001779; GO:0048535; GO:0048541; GO:0002362; GO:0043373; GO:2000179; GO:0030098; GO:0032825; GO:1902232; GO:0002364; GO:0002521; GO:0043375	GO:0003677; GO:0031490	GO:0005634	TOX	252838	TRUE	-0.311002	0.00097397	0.0365035	chr4
ENSMUSG00000022601	ENSMUST00000050248; ENSMUST00000183440; ENSMUST00000184618	Zbtb11	protein_coding	protein_coding	zinc finger and BTB domain containing 11 [Source:MGI Symbol;Acc:MGI:2443876]	0.4129	3631	GO:0006357; GO:0006355; GO:0008150	GO:0005515; GO:0003677; GO:0046872; GO:0000978; GO:0000981; GO:0003674	GO:0005654; GO:0005634; GO:0005730	ZBTB11	271377	TRUE	-0.188483	0.000978038	0.0365035	chr16
ENSMUSG00000005871	ENSMUST00000171187; ENSMUST00000115781; ENSMUST00000079362; ENSMUST00000170023; ENSMUST00000163295; ENSMUST00000170195; ENSMUST00000066133; ENSMUST00000165590; ENSMUST00000167136	Apc	protein_coding	protein_coding	APC, WNT signaling pathway regulator [Source:MGI Symbol;Acc:MGI:88039]	0.4492	4240	GO:0016055; GO:0006974; GO:0051726; GO:0008285; GO:0000281; GO:0016477; GO:0043065; GO:0030178; GO:0007026; GO:0007094; GO:0008286; GO:0010942; GO:0030335; GO:0031274; GO:0032886; GO:0045732; GO:0045736; GO:0051988; GO:0065003; GO:0090090; GO:1902807; GO:1904781; GO:2000134	GO:0005515; GO:0008013; GO:0008017; GO:0019887; GO:0019901; GO:0031625; GO:0045295; GO:0051010; GO:0070840	GO:0005634; GO:0005737; GO:0005874; GO:0000776; GO:0005654; GO:0005794; GO:0005813; GO:0005886; GO:0005912; GO:0005923; GO:0016328; GO:0016342; GO:0030027; GO:0030877; GO:0032587; GO:0048471	APC	11789	TRUE	-0.217567	0.000978126	0.0365035	chr18
ENSMUSG00000037857	ENSMUST00000100802; ENSMUST00000181023; ENSMUST00000126942; ENSMUST00000155238	Nufip2	protein_coding	protein_coding	nuclear FMR1 interacting protein 2 [Source:MGI Symbol;Acc:MGI:1915814]	0.4928	2160		GO:0003723	GO:0005634; GO:0005829; GO:0005737; GO:0016604; GO:0005654; GO:0010494; GO:0042788	NUFIP2	68564	TRUE	-0.261666	0.000982268	0.0365035	chr11
ENSMUSG00000010064	ENSMUST00000167868; ENSMUST00000010208; ENSMUST00000194895; ENSMUST00000193932; ENSMUST00000177567; ENSMUST00000195739; ENSMUST00000192211; ENSMUST00000194230; ENSMUST00000195033; ENSMUST00000191923; ENSMUST00000192323; ENSMUST00000192990; ENSMUST00000195843; ENSMUST00000193495	Slc38a3	protein_coding	protein_coding	solute carrier family 38, member 3 [Source:MGI Symbol;Acc:MGI:1923507]	0.5615	1422	GO:0006811; GO:0006814; GO:0006865; GO:0003333; GO:0006868; GO:0015808; GO:0051365; GO:1903803; GO:0080144; GO:0015817; GO:0006867; GO:0007420; GO:0007565; GO:0010585; GO:0061402; GO:1902024; GO:1903810; GO:1903811; GO:2000487	GO:0015293; GO:0015297; GO:0015179; GO:0015186; GO:0015180; GO:0005290; GO:0005295; GO:0015182	GO:0016020; GO:0016021; GO:0005886; GO:0005887; GO:0016323; GO:0016324	SLC38A3	76257	TRUE	0.272179	0.000982652	0.0365035	chr9
ENSMUSG00000004591	ENSMUST00000043812; ENSMUST00000173913; ENSMUST00000174422; ENSMUST00000173830; ENSMUST00000166330; ENSMUST00000200315; ENSMUST00000172521; ENSMUST00000173615; ENSMUST00000174169; ENSMUST00000174680; ENSMUST00000174099; ENSMUST00000172916; ENSMUST00000197529	Pkn2	protein_coding	protein_coding	protein kinase N2 [Source:MGI Symbol;Acc:MGI:109211]	0.4267	2316	GO:0007165; GO:0006468; GO:0016310; GO:0030030; GO:0007155; GO:0007049; GO:0035556; GO:0051301; GO:0018105; GO:0006915; GO:0043297; GO:0032467; GO:0045931; GO:0045070; GO:0010631; GO:2000145	GO:0005524; GO:0004672; GO:0004674; GO:0016740; GO:0000166; GO:0016301; GO:0005515; GO:0106310; GO:0031267; GO:0042826; GO:0004697; GO:0004698; GO:0070063	GO:0005634; GO:0005829; GO:0005737; GO:0016604; GO:0005654; GO:0016020; GO:0005886; GO:0032991; GO:0048471; GO:0070161; GO:0005856; GO:0042995; GO:0030027; GO:0030496; GO:0032154; GO:0005813; GO:0043296; GO:0045111; GO:0016021	PKN2	109333	TRUE	-0.234966	0.000989183	0.0366325	chr3
ENSMUSG00000024870	ENSMUST00000025804; ENSMUST00000237438; ENSMUST00000236149; ENSMUST00000237201	Rab1b	protein_coding	protein_coding	RAB1B, member RAS oncogene family [Source:MGI Symbol;Acc:MGI:1923558]	0.5613	1038	GO:0006914; GO:0015031; GO:0006888; GO:0007030; GO:0000045; GO:0006886; GO:2000785; GO:1903020; GO:0019068	GO:0005525; GO:0003924; GO:0016787; GO:0000166; GO:0003925	GO:0005739; GO:0045202; GO:0005737; GO:0016020; GO:0005794; GO:0034045; GO:0048471; GO:0005793	RAB1B	76308	TRUE	0.125583	0.000991156	0.0366325	chr19
ENSMUSG00000020538	ENSMUST00000134660; ENSMUST00000020846; ENSMUST00000141161; ENSMUST00000144942; ENSMUST00000129869; ENSMUST00000156304; ENSMUST00000154925; ENSMUST00000136426; ENSMUST00000149238; ENSMUST00000154620; ENSMUST00000147967; ENSMUST00000136215	Srebf1	protein_coding	protein_coding	sterol regulatory element binding transcription factor 1 [Source:MGI Symbol;Acc:MGI:107606]	0.5975	1466	GO:0045944; GO:0030073; GO:0000122; GO:0006357; GO:0009267; GO:0006366; GO:0006629; GO:0008202; GO:0008203; GO:0006355; GO:0045893; GO:0030522; GO:0008610; GO:0007623; GO:0046676; GO:0042789; GO:0050796; GO:0031647; GO:0045444; GO:0032933; GO:0009749; GO:0045089; GO:0006695; GO:1902895; GO:1903214; GO:0031065; GO:0008286; GO:0019217; GO:0046889; GO:0045542; GO:1903146; GO:0010867; GO:0003062; GO:…	GO:0046983; GO:0043565; GO:0005515; GO:0044877; GO:0000978; GO:0003682; GO:0003677; GO:0000981; GO:0003700; GO:0000977; GO:0001228; GO:1990837; GO:0019901; GO:0001221; GO:0004879; GO:0032810	GO:0016020; GO:0016021; GO:0005634; GO:0005737; GO:0000139; GO:0005794; GO:0005783; GO:0005789; GO:0032991; GO:0031410; GO:0043231; GO:0012507; GO:0005654	SREBF1	20787	TRUE	0.164462	0.00099668	0.0367434	chr11
ENSMUSG00000021395	ENSMUST00000095797; ENSMUST00000223152	Spin1	protein_coding	protein_coding	spindlin 1 [Source:MGI Symbol;Acc:MGI:109242]	0.4438	4260	GO:0007276; GO:0006355; GO:0051321; GO:0016055; GO:0045893; GO:0006325; GO:0007049; GO:0030177; GO:0009303; GO:0007143	GO:0003677; GO:0035064	GO:0005634; GO:0005730; GO:0005829; GO:0005654; GO:0005737; GO:0005856; GO:0031965; GO:0005819	SPIN1	20729	TRUE	-0.139288	0.00100447	0.036937	chr13
ENSMUSG00000041703	ENSMUST00000039118; ENSMUST00000143084	Zic5	protein_coding	protein_coding	zinc finger protein of the cerebellum 5 [Source:MGI Symbol;Acc:MGI:1929518]	0.498	2736		GO:0003677; GO:0046872; GO:0000977; GO:1990837	GO:0005634	ZIC5	65100	TRUE	-0.692401	0.00100774	0.0369464	chr14
ENSMUSG00000033799	ENSMUST00000096069; ENSMUST00000222909; ENSMUST00000222615; ENSMUST00000221629; ENSMUST00000221059; ENSMUST00000222041; ENSMUST00000222325; ENSMUST00000223327	Tasor2	protein_coding	protein_coding	transcription activation suppressor family member 2 [Source:MGI Symbol;Acc:MGI:2145274]	0.3897	2897	GO:0008150; GO:0045814	GO:0003674	GO:0005829; GO:0005654	TASOR2	105203	TRUE	-0.28616	0.0010098	0.0369464	chr13
ENSMUSG00000026163	ENSMUST00000160953; ENSMUST00000159078; ENSMUST00000053075; ENSMUST00000160237; ENSMUST00000160567	Sphkap	protein_coding	protein_coding	SPHK1 interactor, AKAP domain containing [Source:MGI Symbol;Acc:MGI:1924879]	0.4814	4174		GO:0051018		SPHKAP	77629	TRUE	-0.377084	0.00101575	0.0369833	chr1
ENSMUSG00000019230	ENSMUST00000019374; ENSMUST00000093486; ENSMUST00000112030; ENSMUST00000046870; ENSMUST00000112026; ENSMUST00000192425; ENSMUST00000194557	Lhx9	protein_coding	protein_coding	LIM homeobox protein 9 [Source:MGI Symbol;Acc:MGI:1316721]	0.4468	3262	GO:0008283; GO:0006355; GO:0006357; GO:0048731; GO:0045892; GO:0030182; GO:0008584; GO:0008585; GO:0035262; GO:0097380	GO:0003677; GO:0005515; GO:0046872; GO:0000981; GO:0000977; GO:1990837	GO:0005634	LHX9	16876	TRUE	-0.420451	0.00101653	0.0369833	chr1
ENSMUSG00000046449	ENSMUST00000118314; ENSMUST00000087879; ENSMUST00000056502	Nexmif	protein_coding	protein_coding	neurite extension and migration factor [Source:MGI Symbol;Acc:MGI:2148050]	0.4292	9193	GO:0007399; GO:2001223; GO:0001953; GO:2000048; GO:0033629		GO:0005634; GO:0005829; GO:0005654; GO:0005737; GO:0030496; GO:0072686	NEXMIF	245555	TRUE	-0.435721	0.00101921	0.0369833	chrX
ENSMUSG00000026640	ENSMUST00000194398; ENSMUST00000027952; ENSMUST00000125381; ENSMUST00000135664; ENSMUST00000124785	Plxna2	protein_coding	protein_coding	plexin A2 [Source:MGI Symbol;Acc:MGI:107684]	0.5093	4285	GO:0007165; GO:0071526; GO:0051642; GO:0043087; GO:0030334; GO:0008360; GO:0001756; GO:0007166; GO:0007162; GO:0050772; GO:1902287; GO:0021915; GO:0060037; GO:0021935; GO:0060174	GO:0005515; GO:0017154; GO:0042802	GO:0016020; GO:0016021; GO:0005886; GO:0005887; GO:0062023; GO:0002116	PLXNA2	18845	TRUE	-0.247539	0.00102289	0.0369833	chr1
ENSMUSG00000035696	ENSMUST00000098098; ENSMUST00000102934; ENSMUST00000045793; ENSMUST00000107836; ENSMUST00000136730; ENSMUST00000148869; ENSMUST00000145378; ENSMUST00000152216; ENSMUST00000128426; ENSMUST00000145760; ENSMUST00000143337; ENSMUST00000153384; ENSMUST00000137194; ENSMUST00000123844; ENSMUST00000129621; ENSMUST00000153116; ENSMUST00000147302	Rnf38	protein_coding	protein_coding	ring finger protein 38 [Source:MGI Symbol;Acc:MGI:1920719]	0.5045	1648	GO:0016567	GO:0016740; GO:0046872; GO:0061630	GO:0005634; GO:0005654; GO:0036126	RNF38	73469	TRUE	-0.157708	0.00102351	0.0369833	chr4
ENSMUSG00000021377	ENSMUST00000138401; ENSMUST00000021807; ENSMUST00000224150; ENSMUST00000135278; ENSMUST00000129352; ENSMUST00000143933; ENSMUST00000150652	Dek	protein_coding	protein_coding	DEK proto-oncogene (DNA binding) [Source:MGI Symbol;Acc:MGI:1926209]	0.4555	1139	GO:0006325; GO:2001032; GO:0006338; GO:0045945; GO:0035066; GO:0045943; GO:0045944; GO:2000779	GO:0042393; GO:0003677	GO:0005634; GO:0005654; GO:0043292; GO:0005730; GO:0110016	DEK	110052	TRUE	-0.204375	0.00102813	0.0370585	chr13
ENSMUSG00000077450	ENSMUST00000235046; ENSMUST00000057373; ENSMUST00000173860; ENSMUST00000172894; ENSMUST00000173987; ENSMUST00000174744	Rab11b	protein_coding	protein_coding	RAB11B, member RAS oncogene family [Source:MGI Symbol;Acc:MGI:99425]	0.5386	2655	GO:0015031; GO:0006887; GO:2000008; GO:0071468; GO:0001881; GO:0032456; GO:0090150; GO:0045054; GO:0016192; GO:0045055; GO:0035773; GO:0044070; GO:2001135; GO:0032402; GO:0033572; GO:0150093	GO:0005525; GO:0003924; GO:0005515; GO:0016787; GO:0000166; GO:0019003; GO:0003925; GO:0031489	GO:0005739; GO:0005737; GO:0016020; GO:0031410; GO:0045202; GO:0005794; GO:0008021; GO:0005768; GO:0055037; GO:0030670; GO:0030672; GO:0055038; GO:0045335; GO:0098993	RAB11B	19326	TRUE	0.146797	0.00103524	0.0372226	chr17
ENSMUSG00000090053	ENSMUST00000102905; ENSMUST00000102904; ENSMUST00000142556; ENSMUST00000131201	Pakap	protein_coding	protein_coding	paralemmin A kinase anchor protein [Source:MGI Symbol;Acc:MGI:5141924]	0.484	1994	GO:0008360; GO:0007015; GO:0008104; GO:0007178	GO:0044877; GO:0019904; GO:0051018	GO:0016020; GO:0005886; GO:0032991	PALM2AKAP2	677884	TRUE	-0.278867	0.00104938	0.0375759	chr4
ENSMUSG00000025946	ENSMUST00000140190; ENSMUST00000027083	Pth2r	protein_coding	protein_coding	parathyroid hormone 2 receptor [Source:MGI Symbol;Acc:MGI:2180917]	0.4788	1522	GO:0007186; GO:0007166; GO:0007165; GO:0120162; GO:0007188	GO:0004930; GO:0004888; GO:0017046; GO:0008528; GO:0004991	GO:0016020; GO:0016021; GO:0005886	PTH2R	213527	TRUE	-0.691143	0.00105452	0.0375759	chr1
ENSMUSG00000025422	ENSMUST00000239120; ENSMUST00000039259; ENSMUST00000217941	Agap2	protein_coding	protein_coding	ArfGAP with GTPase domain, ankyrin repeat and PH domain 2 [Source:MGI Symbol;Acc:MGI:3580016]	0.6194	5094	GO:0050790; GO:0043066; GO:0045944; GO:0006915; GO:0043524; GO:0007259; GO:0033598; GO:0033601; GO:0042177; GO:0045860; GO:2001240; GO:0090630; GO:0032147; GO:0016197; GO:0043552; GO:0014068; GO:1904019; GO:1904036; GO:0030036; GO:2000010; GO:0060749; GO:0046427; GO:1905430	GO:0005515; GO:0005525; GO:0005096; GO:0003924; GO:0046872; GO:0044877; GO:0000166; GO:0005524; GO:0019901; GO:0035014; GO:0030295	GO:0005634; GO:0005829; GO:0005737; GO:0005654; GO:0009897; GO:0005768; GO:0030425; GO:0090543	AGAP2	216439	TRUE	-0.17202	0.00105483	0.0375759	chr10
ENSMUSG00000035164	ENSMUST00000213645; ENSMUST00000165519	Zc3h12c	protein_coding	protein_coding	zinc finger CCCH type containing 12C [Source:MGI Symbol;Acc:MGI:3026959]	0.4161	6448	GO:0090502; GO:0090305	GO:0046872; GO:0016787; GO:0003729; GO:0004518; GO:0004519; GO:0004521	GO:0005634; GO:0036464	ZC3H12C	244871	TRUE	-0.29119	0.00105539	0.0375759	chr9
ENSMUSG00000057181	ENSMUST00000179332; ENSMUST00000103225; ENSMUST00000149614; ENSMUST00000134274	5730455P16Rik	protein_coding	protein_coding	RIKEN cDNA 5730455P16 gene [Source:MGI Symbol;Acc:MGI:1917841]	0.4586	2573	GO:0099041; GO:0006886	GO:0003674	GO:0005802; GO:0031410	C17orf75	70591	TRUE	-0.136081	0.00106052	0.0376416	chr11
ENSMUSG00000000266	ENSMUST00000128809; ENSMUST00000112990; ENSMUST00000112988; ENSMUST00000112993; ENSMUST00000140144	Mid2	protein_coding	protein_coding	midline 2 [Source:MGI Symbol;Acc:MGI:1344333]	0.4459	3508	GO:0045893; GO:0010508; GO:0032897; GO:0035372; GO:0043123; GO:0044790; GO:0045087; GO:0046597; GO:0051091; GO:0051092	GO:0008270; GO:0046872; GO:0005515; GO:0016740; GO:0003713; GO:0008017; GO:0019899; GO:0042803; GO:0051219	GO:0005737; GO:0005856; GO:0005874	MID2	23947	TRUE	-0.197777	0.0010624	0.0376416	chrX
ENSMUSG00000042744	ENSMUST00000042614; ENSMUST00000201669; ENSMUST00000128514; ENSMUST00000148368; ENSMUST00000100769; ENSMUST00000155743; ENSMUST00000130655	Hectd4	protein_coding	protein_coding	HECT domain E3 ubiquitin protein ligase 4 [Source:MGI Symbol;Acc:MGI:3647820]	0.5257	3479	GO:0006006; GO:0016567; GO:0042593	GO:0004842		HECTD4	269700	TRUE	-0.172939	0.0010769	0.0380628	chr5
ENSMUSG00000023175	ENSMUST00000179781; ENSMUST00000067036; ENSMUST00000179201; ENSMUST00000178383; ENSMUST00000105381; ENSMUST00000180235	Bsg	protein_coding	protein_coding	basigin [Source:MGI Symbol;Acc:MGI:88208]	0.5569	1058	GO:0007155; GO:0007411; GO:0007283; GO:0030154; GO:0046718; GO:0032755; GO:0001525; GO:0045494; GO:0030593; GO:0072659; GO:0007156; GO:0070593; GO:0010595; GO:0010575; GO:0046598; GO:0061154; GO:1904466; GO:0007566; GO:0042475; GO:0043434; GO:0046689; GO:0046697; GO:0051591; GO:0003407	GO:0038023; GO:0098632; GO:0005515; GO:0030246; GO:0001618; GO:0005537	GO:0005739; GO:0016020; GO:0016021; GO:0005886; GO:0005783; GO:0005789; GO:0030424; GO:0043231; GO:0016323; GO:0042995; GO:0042383; GO:0005887; GO:0005768; GO:0045121; GO:0001917; GO:0002080; GO:0001750; GO:0016328	BSG	12215	TRUE	0.188683	0.00108327	0.0381514	chr10
ENSMUSG00000050714	ENSMUST00000067043; ENSMUST00000102789; ENSMUST00000203522	Zbtb26	protein_coding	protein_coding	zinc finger and BTB domain containing 26 [Source:MGI Symbol;Acc:MGI:2444402]	0.4119	3990	GO:0000122; GO:0006357	GO:0005515; GO:0000978; GO:0001227; GO:0042802; GO:1990837	GO:0005654	ZBTB26	320633	TRUE	-0.402619	0.00108465	0.0381514	chr2
ENSMUSG00000074457	ENSMUST00000098911; ENSMUST00000107335; ENSMUST00000127008; ENSMUST00000107334; ENSMUST00000150833; ENSMUST00000107333; ENSMUST00000107331; ENSMUST00000098910	S100a16	protein_coding	protein_coding	S100 calcium binding protein A16 [Source:MGI Symbol;Acc:MGI:1915110]	0.5534	784	GO:0051592	GO:0005509; GO:0046872; GO:0048306; GO:0042802; GO:0042803	GO:0005634; GO:0005730; GO:0005829; GO:0005737; GO:0005886; GO:0005615	S100A16	67860	TRUE	0.324693	0.00109599	0.0384039	chr3
ENSMUSG00000038274	ENSMUST00000178310; ENSMUST00000237859; ENSMUST00000043074; ENSMUST00000236336; ENSMUST00000236021; ENSMUST00000236976; ENSMUST00000179142; ENSMUST00000236217; ENSMUST00000237840	Fau	protein_coding	protein_coding	Finkel-Biskis-Reilly murine sarcoma virus (FBR-MuSV) ubiquitously expressed (fox derived) [Source:MGI Symbol;Acc:MGI:102547]	0.5846	532	GO:0006412; GO:0002227; GO:0019731; GO:0050830; GO:0061844	GO:0005515; GO:0003735	GO:0005840; GO:1990904; GO:0005615; GO:0022626; GO:0022627	FAU	14109	TRUE	0.203237	0.0010986	0.0384039	chr19
ENSMUSG00000025558	ENSMUST00000212376; ENSMUST00000211803; ENSMUST00000040700; ENSMUST00000212181; ENSMUST00000212416; ENSMUST00000239077; ENSMUST00000100299; ENSMUST00000212719; ENSMUST00000212371; ENSMUST00000211907; ENSMUST00000211993; ENSMUST00000238406	Dock9	protein_coding	protein_coding	dedicator of cytokinesis 9 [Source:MGI Symbol;Acc:MGI:106321]	0.504	4174	GO:0050790; GO:0007264	GO:0005085		DOCK9	105445	TRUE	-0.160034	0.00109974	0.0384039	chr14
ENSMUSG00000042742	ENSMUST00000045235; ENSMUST00000203078	Bmt2	protein_coding	protein_coding	base methyltransferase of 25S rRNA 2 [Source:MGI Symbol;Acc:MGI:2141466]	0.3845	4302	GO:0032259; GO:1904262; GO:0034198	GO:0016740; GO:0008168; GO:1904047	GO:1990130; GO:0140007	BMT2	101148	TRUE	-0.231177	0.00110532	0.0385063	chr6
ENSMUSG00000037926	ENSMUST00000156488; ENSMUST00000037912; ENSMUST00000180394; ENSMUST00000127890; ENSMUST00000181283; ENSMUST00000180554; ENSMUST00000180545	Ssh2	protein_coding	protein_coding	slingshot protein phosphatase 2 [Source:MGI Symbol;Acc:MGI:2679255]	0.463	3600	GO:0030837; GO:0006470; GO:0016311; GO:0030036; GO:0030335	GO:0016791; GO:0003779; GO:0008138; GO:0016787; GO:0004721; GO:0004725; GO:0004722; GO:0017018	GO:0005737; GO:0070161; GO:0005856; GO:0005925	SSH2	237860	TRUE	-0.184402	0.00111045	0.0385353	chr11
ENSMUSG00000045160	ENSMUST00000122216; ENSMUST00000120040; ENSMUST00000136501; ENSMUST00000133122; ENSMUST00000127769; ENSMUST00000151329; ENSMUST00000055875; ENSMUST00000134765; ENSMUST00000148875	Bola3	protein_coding	protein_coding	bolA-like 3 (E. coli) [Source:MGI Symbol;Acc:MGI:1925903]	0.5226	756	GO:0008150; GO:0106035	GO:0003674	GO:0005739; GO:0005829; GO:0016604; GO:1990229; GO:0005759	BOLA3	78653	TRUE	0.204648	0.00111144	0.0385353	chr6
ENSMUSG00000000253	ENSMUST00000000260; ENSMUST00000128873; ENSMUST00000129176; ENSMUST00000222227	Gmpr	protein_coding	protein_coding	guanosine monophosphate reductase [Source:MGI Symbol;Acc:MGI:1913605]	0.5489	866	GO:0009117; GO:0006144; GO:0032264; GO:0006163	GO:0016491; GO:0003824; GO:0003920; GO:0046872	GO:1902560	GMPR	66355	TRUE	0.155261	0.00112313	0.0388002	chr13
ENSMUSG00000040423	ENSMUST00000239200; ENSMUST00000161609; ENSMUST00000035911; ENSMUST00000161708	Rc3h1	protein_coding	protein_coding	RING CCCH (C3H) domains 1 [Source:MGI Symbol;Acc:MGI:2685397]	0.4288	6566	GO:0050863; GO:0010608; GO:0042129; GO:0010468; GO:0016567; GO:0000209; GO:0006511; GO:0000956; GO:0043029; GO:0050852; GO:0061014; GO:1901224; GO:0048536; GO:0061158; GO:0042098; GO:0000288; GO:0001782; GO:0071347; GO:0048535; GO:0046007; GO:0061470; GO:2000320; GO:2000628; GO:0002634; GO:0002635; GO:0030889; GO:0033962; GO:0043488; GO:0045623; GO:0050856; GO:1900151	GO:0046872; GO:0003730; GO:0005515; GO:0003729; GO:0016740; GO:0003723; GO:0004842; GO:0008270; GO:0003725; GO:0035613; GO:0061630; GO:1905762; GO:0035198	GO:0005737; GO:0000932; GO:0010494	RC3H1	381305	TRUE	-0.232142	0.00112441	0.0388002	chr1
ENSMUSG00000019775	ENSMUST00000131996; ENSMUST00000064225; ENSMUST00000117676; ENSMUST00000019909	Rgs17	protein_coding	protein_coding	regulator of G-protein signaling 17 [Source:MGI Symbol;Acc:MGI:1927469]	0.4118	4695	GO:0050790; GO:0009968; GO:0007186	GO:0005096; GO:0005515	GO:0005634; GO:0005737; GO:0016020; GO:0045202; GO:0043005	RGS17	56533	TRUE	-0.278116	0.00113198	0.0389482	chr10
ENSMUSG00000019861	ENSMUST00000217995; ENSMUST00000105475; ENSMUST00000020008; ENSMUST00000217753; ENSMUST00000220099; ENSMUST00000217710	Gopc	protein_coding	protein_coding	golgi associated PDZ and coiled-coil motif containing [Source:MGI Symbol;Acc:MGI:2149946]	0.4326	3560	GO:0043004; GO:0010360; GO:2000009; GO:0050790; GO:0006914; GO:0015031; GO:0007289	GO:0005515; GO:0042802; GO:0044325; GO:0008022; GO:0030695; GO:0042803; GO:0005109; GO:0019905	GO:0005794; GO:0005737; GO:0016020; GO:0030140; GO:0032991; GO:0045202; GO:0000139; GO:0042995; GO:0030425; GO:0014069; GO:0005886	GOPC	94221	TRUE	-0.174148	0.00113405	0.0389482	chr10
ENSMUSG00000052459	ENSMUST00000114666; ENSMUST00000063661; ENSMUST00000130036; ENSMUST00000137557; ENSMUST00000124102; ENSMUST00000147025	Atp6v1a	protein_coding	protein_coding	ATPase, H+ transporting, lysosomal V1 subunit A [Source:MGI Symbol;Acc:MGI:1201780]	0.4778	2198	GO:1902600; GO:0046034; GO:0006811; GO:0006879; GO:0036295; GO:0015986	GO:0005524; GO:0046961; GO:0000166; GO:0046933	GO:0005739; GO:0005829; GO:0005654; GO:0005737; GO:0016020; GO:0005886; GO:0031410; GO:0043231; GO:0016324; GO:0005764; GO:0030665; GO:0000221; GO:0033180; GO:0030141; GO:0043209; GO:0005902; GO:0030133	ATP6V1A	11964	TRUE	-0.154426	0.0011462	0.0392728	chr16
ENSMUSG00000013611	ENSMUST00000013755; ENSMUST00000161202; ENSMUST00000162888; ENSMUST00000160936	Snx31	protein_coding	protein_coding	sorting nexin 31 [Source:MGI Symbol;Acc:MGI:1913946]	0.4914	1452	GO:0015031; GO:0006886	GO:0035091	GO:0032991; GO:0005769	SNX31	66696	TRUE	-0.684639	0.00115243	0.0393057	chr15
ENSMUSG00000031253	ENSMUST00000033606; ENSMUST00000113304	Srpx2	protein_coding	protein_coding	sushi-repeat-containing protein, X-linked 2 [Source:MGI Symbol;Acc:MGI:1916042]	0.5052	2569	GO:0098609; GO:0007155; GO:0001525; GO:0048870; GO:0051965; GO:0042325; GO:0090050; GO:0071625	GO:0005102; GO:0042802; GO:0005201; GO:0036458	GO:0005737; GO:0005615; GO:0009986; GO:0045202; GO:0005576; GO:0097060; GO:0060076; GO:0062023	SRPX2	68792	TRUE	-0.432069	0.00115563	0.0393057	chrX
ENSMUSG00000106001	ENSMUST00000197548	Gm42826	protein_coding	TEC	predicted gene 42826 [Source:MGI Symbol;Acc:MGI:5662963]	0.4335	2639						TRUE	0.935874	0.0011573	0.0393057	chr3
ENSMUSG00000027171	ENSMUST00000028593; ENSMUST00000126824	Prrg4	protein_coding	protein_coding	proline rich Gla (G-carboxyglutamic acid) 4 (transmembrane) [Source:MGI Symbol;Acc:MGI:2442211]	0.467	1812	GO:0008150	GO:0005509; GO:0003674; GO:0050699	GO:0005576; GO:0016020; GO:0016021; GO:0005886; GO:0033116	PRRG4	228413	TRUE	-1.06365	0.00115796	0.0393057	chr2
ENSMUSG00000032878	ENSMUST00000093253; ENSMUST00000109502; ENSMUST00000042534; ENSMUST00000146385; ENSMUST00000160016; ENSMUST00000140601; ENSMUST00000109501	Ccdc85a	protein_coding	protein_coding	coiled-coil domain containing 85A [Source:MGI Symbol;Acc:MGI:2445069]	0.4675	3409	GO:0008150	GO:0003674	GO:0070161; GO:0005912	CCDC85A	216613	TRUE	-0.201992	0.00117141	0.039637	chr11
ENSMUSG00000033499	ENSMUST00000188211; ENSMUST00000188939; ENSMUST00000190041; ENSMUST00000091829; ENSMUST00000188523; ENSMUST00000190331; ENSMUST00000189330	Larp4b	protein_coding	protein_coding	La ribonucleoprotein domain family, member 4B [Source:MGI Symbol;Acc:MGI:106330]	0.4839	2857	GO:0045727; GO:0006417; GO:1905870	GO:0003730; GO:0003676; GO:0003723	GO:0005730; GO:0005829; GO:0005737; GO:0010494; GO:0042788	LARP4B	217980	TRUE	-0.133869	0.00117316	0.039637	chr13
ENSMUSG00000006301	ENSMUST00000016309; ENSMUST00000152603; ENSMUST00000135384; ENSMUST00000113796; ENSMUST00000128505; ENSMUST00000154859; ENSMUST00000130763; ENSMUST00000141560	Tmbim1	protein_coding	protein_coding	transmembrane BAX inhibitor motif containing 1 [Source:MGI Symbol;Acc:MGI:1916910]	0.5555	2674	GO:1902042; GO:1902045; GO:1903077	GO:0005123	GO:0016020; GO:0016021; GO:0005765; GO:0005794; GO:0010008; GO:0043231	TMBIM1	69660	TRUE	0.21924	0.00117888	0.039738	chr1
ENSMUSG00000021870	ENSMUST00000102956; ENSMUST00000112331; ENSMUST00000145738; ENSMUST00000038522; ENSMUST00000090359; ENSMUST00000112330; ENSMUST00000139075; ENSMUST00000142679; ENSMUST00000136635; ENSMUST00000127078; ENSMUST00000136625; ENSMUST00000125437; ENSMUST00000134117; ENSMUST00000129920; ENSMUST00000146438; ENSMUST00000144737	Slmap	protein_coding	protein_coding	sarcolemma associated protein [Source:MGI Symbol;Acc:MGI:1933549]	0.4241	2316	GO:0072659; GO:0006936; GO:1900825; GO:1902305; GO:1905150	GO:0005515	GO:0005615; GO:0005737; GO:0016020; GO:0016021; GO:0005886; GO:0005815; GO:0005856; GO:0042383; GO:0030018; GO:0031430	SLMAP	83997	TRUE	-0.180092	0.00118894	0.0399848	chr14
ENSMUSG00000022468	ENSMUST00000023105; ENSMUST00000230430; ENSMUST00000100249	Endou	protein_coding	protein_coding	endonuclease, polyU-specific [Source:MGI Symbol;Acc:MGI:97746]	0.5169	1848	GO:0090502; GO:0006508; GO:0090305; GO:0006955; GO:0006897; GO:0007565	GO:0004521; GO:0003723; GO:0046872; GO:0016787; GO:0004518; GO:0008236; GO:0016829; GO:0005044; GO:0030247; GO:0004519	GO:0005737; GO:0110165; GO:0005576; GO:0016020; GO:0016021	ENDOU	19011	TRUE	-0.489018	0.00120076	0.0402343	chr15
ENSMUSG00000002395	ENSMUST00000110053; ENSMUST00000110054; ENSMUST00000139541; ENSMUST00000019169; ENSMUST00000143657; ENSMUST00000154550; ENSMUST00000146221; ENSMUST00000136368; ENSMUST00000142685; ENSMUST00000127517; ENSMUST00000140236; ENSMUST00000137137	Use1	protein_coding	protein_coding	unconventional SNARE in the ER 1 homolog (S. cerevisiae) [Source:MGI Symbol;Acc:MGI:1914273]	0.5581	805	GO:0015031; GO:0061025; GO:0016192; GO:0006890; GO:0007029; GO:0071786; GO:0060628	GO:0005484	GO:0016020; GO:0016021; GO:0005783; GO:0005789; GO:0005886; GO:0005794; GO:0031201; GO:0030137	USE1	67023	TRUE	0.160614	0.00120189	0.0402343	chr8
ENSMUSG00000027712	ENSMUST00000029266; ENSMUST00000196097; ENSMUST00000199478	Anxa5	protein_coding	protein_coding	annexin A5 [Source:MGI Symbol;Acc:MGI:106008]	0.5133	941	GO:0010033; GO:0070588; GO:0050819; GO:0007596; GO:0007599; GO:0043065; GO:0030195; GO:0051592; GO:0097211; GO:1901317; GO:1902721	GO:0005509; GO:0005544; GO:0005515; GO:0042802; GO:0030971; GO:0005388; GO:0017046	GO:0005634; GO:0005829; GO:0005737; GO:0005886; GO:0005615; GO:0009897; GO:0005783; GO:0042383; GO:0043025; GO:0030425; GO:0043679; GO:0030018; GO:0043204; GO:0008021; GO:0062023; GO:0014704; GO:0042995; GO:0072563	ANXA5	11747	TRUE	0.174091	0.00121271	0.0405035	chr3
ENSMUSG00000032826	ENSMUST00000044443; ENSMUST00000182588; ENSMUST00000182078; ENSMUST00000182064; ENSMUST00000182571; ENSMUST00000182118; ENSMUST00000182212; ENSMUST00000182271; ENSMUST00000182062; ENSMUST00000182025; ENSMUST00000183075; ENSMUST00000182711; ENSMUST00000182959; ENSMUST00000211813; ENSMUST00000183097; ENSMUST00000182008; ENSMUST00000182547; ENSMUST00000182994; ENSMUST00000182610; ENSMUST00000182452;…	Ank2	protein_coding	protein_coding	ankyrin 2, brain [Source:MGI Symbol;Acc:MGI:88025]	0.4893	2838	GO:0007165; GO:0010628; GO:0086004; GO:0042981; GO:0015031; GO:0007010; GO:0008104; GO:0006897; GO:0051179; GO:0002027; GO:0033365; GO:0072659; GO:0055117; GO:0060048; GO:0051924; GO:0010881; GO:0010882; GO:0098907; GO:0098910; GO:0086091; GO:2001259; GO:0060307; GO:0033292; GO:0051279; GO:0034394; GO:0003283; GO:0086036; GO:0006874; GO:0050821; GO:0070972; GO:0086005; GO:0051928; GO:0031647; GO:…	GO:0005515; GO:0019901; GO:0044325; GO:0005200; GO:0030507; GO:0019899; GO:0030674; GO:0140031; GO:0015459; GO:0051117	GO:0014069; GO:0005737; GO:0016020; GO:0005886; GO:0048471; GO:0005739; GO:0045202; GO:0045211; GO:0005856; GO:0030315; GO:0043005; GO:0005764; GO:0005768; GO:0005769; GO:0055037; GO:0016323; GO:0030018; GO:0045121; GO:0033010; GO:0031430; GO:0042383; GO:0031234; GO:0014704; GO:0031672; GO:0043034; GO:0110165	ANK2	109676	TRUE	-0.191916	0.00121798	0.0405862	chr3
ENSMUSG00000022295	ENSMUST00000022904; ENSMUST00000228486; ENSMUST00000228475; ENSMUST00000228820; ENSMUST00000226487; ENSMUST00000226533; ENSMUST00000227482	Atp6v1c1	protein_coding	protein_coding	ATPase, H+ transporting, lysosomal V1 subunit C1 [Source:MGI Symbol;Acc:MGI:1913585]	0.4942	1366	GO:1902600; GO:0006811	GO:0046961; GO:0015078	GO:0033180; GO:0005737; GO:0016020; GO:0005886; GO:0031410; GO:0045202; GO:0045177; GO:0030665; GO:0000221; GO:0030672	ATP6V1C1	66335	TRUE	-0.0997001	0.00122093	0.0405917	chr15
ENSMUSG00000028559	ENSMUST00000084366; ENSMUST00000194478; ENSMUST00000160271; ENSMUST00000160774; ENSMUST00000159545; ENSMUST00000030288; ENSMUST00000159198; ENSMUST00000162787; ENSMUST00000161363; ENSMUST00000155434; ENSMUST00000139412; ENSMUST00000126288; ENSMUST00000152167; ENSMUST00000161602; ENSMUST00000160895; ENSMUST00000153714; ENSMUST00000139248; ENSMUST00000147457; ENSMUST00000159758	Osbpl9	protein_coding	protein_coding	oxysterol binding protein-like 9 [Source:MGI Symbol;Acc:MGI:1923784]	0.4548	1559	GO:0006869; GO:0015918	GO:0008289; GO:0015248; GO:0032934	GO:0005829; GO:0016020; GO:0005794; GO:0043231; GO:0005768; GO:0031902	OSBPL9	100273	TRUE	-0.137961	0.00122547	0.0406499	chr4
ENSMUSG00000021876	ENSMUST00000022428; ENSMUST00000169895	Rnase4	protein_coding	protein_coding	ribonuclease, RNase A family 4 [Source:MGI Symbol;Acc:MGI:1926217]	0.4573	1489	GO:0090501	GO:0016787; GO:0003676; GO:0004518; GO:0004519; GO:0004540	GO:0005576; GO:0005615	RNASE4	58809	TRUE	0.295594	0.00123039	0.0407203	chr14
ENSMUSG00000041477	ENSMUST00000112777; ENSMUST00000073909; ENSMUST00000149651; ENSMUST00000136437; ENSMUST00000127059	Dcp1b	protein_coding	protein_coding	decapping mRNA 1B [Source:MGI Symbol;Acc:MGI:2442404]	0.5161	2403	GO:0000290; GO:0043085; GO:0000184; GO:0097398; GO:0034504; GO:0031087; GO:0110012	GO:0008047; GO:0005515; GO:0016787; GO:0003729	GO:0005737; GO:0043229; GO:0005829; GO:0043231; GO:0000932; GO:0005634	DCP1B	319618	TRUE	0.229506	0.00123474	0.0407715	chr6
ENSMUSG00000056073	ENSMUST00000218823; ENSMUST00000217673; ENSMUST00000105484; ENSMUST00000218598; ENSMUST00000219509; ENSMUST00000218441; ENSMUST00000220330; ENSMUST00000079751; ENSMUST00000219051; ENSMUST00000218669; ENSMUST00000220263	Grik2	protein_coding	protein_coding	glutamate receptor, ionotropic, kainate 2 (beta 2) [Source:MGI Symbol;Acc:MGI:95815]	0.423	2984	GO:0043524; GO:0051402; GO:0035249; GO:0006811; GO:0043525; GO:0034220; GO:0035235; GO:0001662; GO:0006874; GO:0046328; GO:0019228; GO:0042391; GO:0007268; GO:0043113; GO:0050804; GO:0051967; GO:0099505; GO:0060079; GO:0048169; GO:0060080; GO:0050806; GO:0048172; GO:0099171; GO:0098815; GO:0120169	GO:0015276; GO:0004970; GO:0005515; GO:0038023; GO:0005216; GO:0042802; GO:1904315; GO:0030165; GO:0031625; GO:0008066; GO:0015277; GO:0099507; GO:0031624; GO:0005234; GO:0000149; GO:0097110	GO:0016020; GO:0045202; GO:0014069; GO:0030424; GO:0016021; GO:0005886; GO:0045211; GO:0005887; GO:0043025; GO:0030425; GO:0098978; GO:0043204; GO:0043195; GO:0042734; GO:0032839; GO:0032983; GO:0098686; GO:0008328; GO:0070161	GRIK2	14806	TRUE	-0.254801	0.00124007	0.0408551	chr10
ENSMUSG00000093752	ENSMUST00000138667	Gm20716	protein_coding	protein_coding	predicted gene 20716 [Source:MGI Symbol;Acc:MGI:5313163]	0.4452	5288	GO:0006486; GO:0006506; GO:0019348; GO:0019673; GO:0035268; GO:0035269	GO:0016740; GO:0016757; GO:0005537; GO:0004582; GO:0004169; GO:0043178	GO:0005783; GO:0043231; GO:0016020; GO:0005789; GO:0033185		105980075	TRUE	-0.125041	0.00124355	0.0408772	chr2
ENSMUSG00000050812	ENSMUST00000102889; ENSMUST00000149513; ENSMUST00000149301; ENSMUST00000131611; ENSMUST00000135601; ENSMUST00000107557; ENSMUST00000142102; ENSMUST00000151869; ENSMUST00000144512; ENSMUST00000055822; ENSMUST00000134848	Ecpas	protein_coding	protein_coding	Ecm29 proteasome adaptor and scaffold [Source:MGI Symbol;Acc:MGI:2140220]	0.4334	2367	GO:0043248; GO:0030433	GO:0060090; GO:0070628	GO:0005634; GO:0005654; GO:0005737; GO:0005783; GO:0031410; GO:0005815; GO:0005856; GO:0000502; GO:0005768; GO:0005793; GO:0005769; GO:0005770; GO:0005813; GO:0030139; GO:0030134; GO:0005771	ECPAS	230249	TRUE	-0.146611	0.00124703	0.0408992	chr4
ENSMUSG00000006005	ENSMUST00000124973; ENSMUST00000119161; ENSMUST00000131701; ENSMUST00000141827; ENSMUST00000147769; ENSMUST00000132522; ENSMUST00000151563; ENSMUST00000150752; ENSMUST00000132257; ENSMUST00000152967; ENSMUST00000128417; ENSMUST00000124484; ENSMUST00000138718; ENSMUST00000130779	Tpr	protein_coding	protein_coding	translocated promoter region, nuclear basket protein [Source:MGI Symbol;Acc:MGI:1922066]	0.4375	1968	GO:0006606; GO:0000122; GO:0006405; GO:0006406; GO:0015031; GO:0007049; GO:0034605; GO:0051301; GO:0051028; GO:0046832; GO:0007094; GO:0090316; GO:0032880; GO:0006611; GO:0042307; GO:0006913; GO:0006404; GO:0006999; GO:0010965; GO:0031453; GO:0031990; GO:0035457; GO:0045947; GO:0046827; GO:0070849; GO:0090267; GO:1901673	GO:0003729; GO:0003682; GO:0005515; GO:0042803; GO:0017056; GO:0051019; GO:0031072; GO:0015631; GO:0070840	GO:0005634; GO:0005737; GO:0016020; GO:0000775; GO:0000776; GO:0005694; GO:0005856; GO:0031965; GO:0005819; GO:0005635; GO:0005643; GO:0034399; GO:0019898; GO:0005868; GO:0042405; GO:0044615; GO:0072686	TPR	108989	TRUE	-0.14437	0.00126082	0.041192	chr1
ENSMUSG00000035173	ENSMUST00000118592; ENSMUST00000135666; ENSMUST00000076085; ENSMUST00000140705; ENSMUST00000156708; ENSMUST00000140184	Ccdc186	protein_coding	protein_coding	coiled-coil domain containing 186 [Source:MGI Symbol;Acc:MGI:2445022]	0.4533	2069	GO:0009617; GO:0042593; GO:0035773; GO:0099518	GO:0031267	GO:0005794; GO:0005802	CCDC186	213993	TRUE	-0.216572	0.00126162	0.041192	chr19
ENSMUSG00000038172	ENSMUST00000102823; ENSMUST00000143362; ENSMUST00000048274; ENSMUST00000146519; ENSMUST00000150522; ENSMUST00000030205; ENSMUST00000148811	Ttc39b	protein_coding	protein_coding	tetratricopeptide repeat domain 39B [Source:MGI Symbol;Acc:MGI:1917113]	0.4688	2146	GO:0006629; GO:0042632; GO:0010874; GO:0010887; GO:0090181	GO:0005515; GO:0003674	GO:0005575	TTC39B	69863	TRUE	-0.210061	0.00126797	0.0413068	chr4
ENSMUSG00000022500	ENSMUST00000023143; ENSMUST00000117360; ENSMUST00000162323; ENSMUST00000140170; ENSMUST00000230709	Litaf	protein_coding	protein_coding	LPS-induced TN factor [Source:MGI Symbol;Acc:MGI:1929512]	0.5484	1288	GO:0071222; GO:0045944; GO:0032496; GO:0001817; GO:0043123; GO:1901223; GO:0010935	GO:0005515; GO:0000978; GO:0003677; GO:0046872; GO:0008270; GO:0001228; GO:0042802; GO:0050699	GO:0005654; GO:0005634; GO:0005737; GO:0016020; GO:0000139; GO:0005794; GO:0005886; GO:0043231; GO:0005764; GO:0005768; GO:0005765; GO:0010008; GO:0031902; GO:0098560; GO:0098574; GO:0031901; GO:0009898; GO:0098559	LITAF	56722	TRUE	0.321043	0.00127535	0.0413776	chr16
ENSMUSG00000058152	ENSMUST00000237594; ENSMUST00000238155; ENSMUST00000080721	Chsy3	protein_coding	protein_coding	chondroitin sulfate synthase 3 [Source:MGI Symbol;Acc:MGI:1926173]	0.4864	4023	GO:0030206	GO:0016740; GO:0046872; GO:0008376; GO:0047238; GO:0050510	GO:0005575; GO:0016020; GO:0016021; GO:0005794; GO:0032580	CHSY3	78923	TRUE	-0.424045	0.00127663	0.0413776	chr18
ENSMUSG00000063316	ENSMUST00000077856; ENSMUST00000139939; ENSMUST00000107249; ENSMUST00000127514; ENSMUST00000152162	Rpl27	protein_coding	protein_coding	ribosomal protein L27 [Source:MGI Symbol;Acc:MGI:98036]	0.4993	547	GO:0006412; GO:0006364; GO:0002181; GO:1904044	GO:0003735	GO:0005840; GO:0005730; GO:1990904; GO:0005654; GO:0005737; GO:0005783; GO:0005829; GO:0022625; GO:0005791; GO:0022626; GO:0015934; GO:0098556	RPL27	19942	TRUE	0.176327	0.00127866	0.0413776	chr11
ENSMUSG00000039716	ENSMUST00000044532; ENSMUST00000171095; ENSMUST00000166152; ENSMUST00000165562; ENSMUST00000166759; ENSMUST00000168759; ENSMUST00000165075; ENSMUST00000170193; ENSMUST00000167053; ENSMUST00000169164; ENSMUST00000165182	Dock3	protein_coding	protein_coding	dedicator of cyto-kinesis 3 [Source:MGI Symbol;Acc:MGI:2429763]	0.4858	2115	GO:0050790; GO:0007264	GO:0005515; GO:0005085	GO:0005829	DOCK3	208869	TRUE	-0.152077	0.00128358	0.0414445	chr9
ENSMUSG00000024472	ENSMUST00000202306; ENSMUST00000025350	Dcp2	protein_coding	protein_coding	decapping mRNA 2 [Source:MGI Symbol;Acc:MGI:1917890]	0.4835	4507	GO:0006402; GO:0000184; GO:0090503; GO:0000290; GO:0032211; GO:0043488; GO:0071044; GO:1904872	GO:0003723; GO:0016787; GO:0030145; GO:0046872; GO:0050072; GO:0004534	GO:0016442; GO:0000932; GO:0005654; GO:0005634; GO:0005737; GO:0030054; GO:0036464	DCP2	70640	TRUE	-0.165266	0.00130694	0.0420338	chr18
ENSMUSG00000036199	ENSMUST00000110167	Ndufa13	protein_coding	protein_coding	NADH:ubiquinone oxidoreductase subunit A13 [Source:MGI Symbol;Acc:MGI:1914434]	0.6043	1251	GO:0072593; GO:0071300; GO:0035458; GO:0006915; GO:0045892; GO:0045732; GO:0030308; GO:0032981; GO:0043280; GO:0097190; GO:2001243; GO:0009060; GO:0042776; GO:0097191; GO:0045039	GO:0005524	GO:0005739; GO:0005634; GO:0005737; GO:0005654; GO:0016020; GO:0016021; GO:0005743; GO:0070469; GO:0031966; GO:0005747; GO:0005746	NDUFA13	67184	TRUE	0.183073	0.0013076	0.0420338	chr8
ENSMUSG00000059708	ENSMUST00000051906; ENSMUST00000133980	Akap17b	protein_coding	protein_coding	A kinase (PRKA) anchor protein 17B [Source:MGI Symbol;Acc:MGI:2443758]	0.443	3686	GO:0008150; GO:0008380; GO:0006397	GO:0003723; GO:0003674; GO:0003676; GO:0051018	GO:0005634; GO:0016607; GO:0005829; GO:0005681	AKAP17A,AKAP17BP	338351	TRUE	-0.273332	0.00131062	0.042038	chrX
ENSMUSG00000019971	ENSMUST00000220346; ENSMUST00000164751; ENSMUST00000219765; ENSMUST00000220231; ENSMUST00000220331; ENSMUST00000218703; ENSMUST00000219408; ENSMUST00000219643; ENSMUST00000218000; ENSMUST00000219889	Cep290	protein_coding	protein_coding	centrosomal protein 290 [Source:MGI Symbol;Acc:MGI:2384917]	0.3873	3459	GO:0030030; GO:0045893; GO:0060271; GO:0070201; GO:0090316; GO:0060041; GO:0007507; GO:0015031; GO:0001822; GO:0007163; GO:1905515; GO:0045494; GO:0007368; GO:0000226; GO:0043010; GO:1905349; GO:0030902; GO:0030916; GO:0042462; GO:0048793; GO:0097711	GO:0042802; GO:0005515	GO:0005737; GO:0005856; GO:0042995; GO:0005634; GO:0005813; GO:0005814; GO:0005829; GO:0032991; GO:0034451; GO:0035869; GO:0036064; GO:0031410; GO:0005815; GO:0005929; GO:0001750; GO:0032391; GO:0120200; GO:0120206; GO:0036038; GO:0120205	CEP290	216274	TRUE	-0.272188	0.00131816	0.0421134	chr10
ENSMUSG00000039697	ENSMUST00000213897; ENSMUST00000215740; ENSMUST00000213889; ENSMUST00000068567; ENSMUST00000092610; ENSMUST00000216172; ENSMUST00000217644; ENSMUST00000217138; ENSMUST00000215926; ENSMUST00000213836; ENSMUST00000217398; ENSMUST00000215725	Ncoa7	protein_coding	protein_coding	nuclear receptor coactivator 7 [Source:MGI Symbol;Acc:MGI:2444847]	0.4196	2848	GO:0045944; GO:0006357; GO:0006979; GO:1903204; GO:1902083; GO:1900408	GO:0030374; GO:0016922	GO:0005634	NCOA7	211329	TRUE	-0.161181	0.00132242	0.0421134	chr10
ENSMUSG00000037563	ENSMUST00000082134; ENSMUST00000152918; ENSMUST00000155805	Rps16	protein_coding	protein_coding	ribosomal protein S16 [Source:MGI Symbol;Acc:MGI:98118]	0.5276	751	GO:0006412; GO:1990830; GO:0000462; GO:0006364; GO:0042274; GO:0002181	GO:0003735; GO:0003723	GO:0005840; GO:1990904; GO:0015935; GO:0005737; GO:0022627; GO:0005829; GO:0022626	RPS16	20055	TRUE	0.198579	0.00132363	0.0421134	chr7
ENSMUSG00000042680	ENSMUST00000049260; ENSMUST00000234115	Garem1	protein_coding	protein_coding	GRB2 associated regulator of MAPK1 subtype 1 [Source:MGI Symbol;Acc:MGI:2685790]	0.5108	4928	GO:0008284; GO:0051781; GO:0070374; GO:0071364; GO:0007173	GO:0070064	GO:0005575	GAREM1	381126	TRUE	-0.260772	0.00132454	0.0421134	chr18
ENSMUSG00000040044	ENSMUST00000108142; ENSMUST00000048706; ENSMUST00000132918; ENSMUST00000145619; ENSMUST00000156987; ENSMUST00000133107; ENSMUST00000141529; ENSMUST00000140334; ENSMUST00000150116; ENSMUST00000125218; ENSMUST00000154858	Orc3	protein_coding	protein_coding	origin recognition complex, subunit 3 [Source:MGI Symbol;Acc:MGI:1354944]	0.4134	1344	GO:0006260; GO:0006275; GO:0061351; GO:0014009; GO:0006270	GO:0003677; GO:0003688	GO:0016604; GO:0000785; GO:0005654; GO:0005634; GO:0005694; GO:0005664; GO:0000808; GO:0005656; GO:0031261	ORC3	50793	TRUE	-0.185923	0.00132851	0.0421477	chr4
ENSMUSG00000051695	ENSMUST00000053015	Pcbp1	protein_coding	protein_coding	poly(rC) binding protein 1 [Source:MGI Symbol;Acc:MGI:1345635]	0.5776	1830	GO:0045944; GO:0010468; GO:0045727; GO:0006397; GO:0051252; GO:0039694	GO:0003723; GO:0003729; GO:0003677; GO:0003676; GO:0005515; GO:0003697; GO:0000981; GO:0003730; GO:0098847; GO:0008494	GO:0005634; GO:0016607; GO:0005829; GO:0005737; GO:0005654; GO:1990904; GO:0036464	PCBP1	23983	TRUE	0.111381	0.00133265	0.042187	chr6
ENSMUSG00000003534	ENSMUST00000119825; ENSMUST00000117301; ENSMUST00000166980; ENSMUST00000097333; ENSMUST00000003628; ENSMUST00000155957; ENSMUST00000155628; ENSMUST00000148065; ENSMUST00000134995; ENSMUST00000146472; ENSMUST00000145900; ENSMUST00000135078	Ddr1	protein_coding	protein_coding	discoidin domain receptor family, member 1 [Source:MGI Symbol;Acc:MGI:99216]	0.6004	2280	GO:0006468; GO:0007169; GO:0007566; GO:0008285; GO:0008283; GO:0016310; GO:0014909; GO:0061564; GO:0001558; GO:0038063; GO:0046777; GO:0007565; GO:0033674; GO:0001952; GO:0060749; GO:0018108; GO:0044319; GO:1990138; GO:0043583; GO:0038083; GO:0060444; GO:0007595; GO:0010715; GO:0061302	GO:0005524; GO:0004672; GO:0004714; GO:0016740; GO:0046872; GO:0000166; GO:0016301; GO:0004713; GO:0005518; GO:0038062	GO:0016020; GO:0005737; GO:0016021; GO:0005886; GO:0005887; GO:0016323; GO:0005903; GO:0043235	DDR1	12305	TRUE	0.160299	0.00133956	0.0423139	chr17
ENSMUSG00000022175	ENSMUST00000022782; ENSMUST00000227760; ENSMUST00000228407; ENSMUST00000226472	Lrp10	protein_coding	protein_coding	low-density lipoprotein receptor-related protein 10 [Source:MGI Symbol;Acc:MGI:1929480]	0.587	1548	GO:0006629; GO:0006897; GO:0048839; GO:0006869	GO:0005515; GO:0005041	GO:0016020; GO:0016021; GO:0005886; GO:0005905	LRP10	65107	TRUE	0.143333	0.0013663	0.043065	chr14
ENSMUSG00000026775	ENSMUST00000028117; ENSMUST00000125004; ENSMUST00000149240; ENSMUST00000147750; ENSMUST00000148616; ENSMUST00000134342	Yme1l1	protein_coding	protein_coding	YME1-like 1 (S. cerevisiae) [Source:MGI Symbol;Acc:MGI:1351651]	0.3825	1700	GO:0006508; GO:0043066; GO:0007005; GO:0008283; GO:0035694; GO:0034214; GO:0006515; GO:0034982	GO:0005524; GO:0004176; GO:0004222; GO:0016887; GO:0046872; GO:0016787; GO:0000166; GO:0008233; GO:0008237	GO:0016020; GO:0005739; GO:0016604; GO:0016021; GO:0005743	YME1L1	27377	TRUE	-0.195088	0.00137859	0.0433586	chr2
ENSMUSG00000060032	ENSMUST00000074556; ENSMUST00000203982	H2aj	protein_coding	protein_coding	H2J.A histone [Source:MGI Symbol;Acc:MGI:3606192]	0.5874	1204		GO:0003677; GO:0046982; GO:0030527	GO:0005634; GO:0005694; GO:0000786	H2AJ	232440	TRUE	0.304155	0.00138663	0.0434877	chr6
ENSMUSG00000053460	ENSMUST00000065906; ENSMUST00000205738; ENSMUST00000207012; ENSMUST00000132995; ENSMUST00000207000	Ggcx	protein_coding	protein_coding	gamma-glutamyl carboxylase [Source:MGI Symbol;Acc:MGI:1927655]	0.5153	1477	GO:0017187	GO:0008488; GO:0016829; GO:0019842	GO:0016020; GO:0016021; GO:0005783; GO:0005789; GO:0043231	GGCX	56316	TRUE	0.363126	0.00138867	0.0434877	chr6
ENSMUSG00000025135	ENSMUST00000026128; ENSMUST00000148114; ENSMUST00000093140; ENSMUST00000129263	Anapc11	protein_coding	protein_coding	anaphase promoting complex subunit 11 [Source:MGI Symbol;Acc:MGI:1913406]	0.5215	1564	GO:0031145; GO:0016567; GO:0006511; GO:0007049; GO:0051301; GO:0045842; GO:0070979	GO:0008270; GO:0061630; GO:0097602; GO:0046872; GO:0004842; GO:0034450	GO:0005680; GO:0005730; GO:0005654; GO:0005634; GO:0005737; GO:0031461	ANAPC11	66156	TRUE	0.19777	0.00140931	0.0440393	chr11
ENSMUSG00000025019	ENSMUST00000067795; ENSMUST00000237208; ENSMUST00000238398; ENSMUST00000237976; ENSMUST00000163929; ENSMUST00000238431; ENSMUST00000172371	Lcor	protein_coding	protein_coding	ligand dependent nuclear receptor corepressor [Source:MGI Symbol;Acc:MGI:2443930]	0.4661	4338	GO:0000122; GO:0006357; GO:0006366; GO:0071392; GO:1902466	GO:0003677; GO:0005515; GO:0003682; GO:0042826; GO:0003714; GO:1990226; GO:0001222; GO:0030331; GO:1990381	GO:0005654; GO:0005634	LCOR	212391	TRUE	-0.402178	0.00141799	0.0440398	chr19
ENSMUSG00000037428	ENSMUST00000190827; ENSMUST00000041543; ENSMUST00000186451; ENSMUST00000187382	Vgf	protein_coding	protein_coding	VGF nerve growth factor inducible [Source:MGI Symbol;Acc:MGI:1343180]	0.6442	2061	GO:0030073; GO:0032868; GO:0007165; GO:0042742; GO:0042593; GO:0001541; GO:0002021; GO:0006091; GO:0048168; GO:0009409; GO:0019953; GO:0043084; GO:0048167; GO:0033500; GO:0051591	GO:0005184; GO:0008083; GO:0005179	GO:0045202; GO:0005615; GO:0005794; GO:0031410; GO:0043231; GO:0005576; GO:0043005; GO:0043025; GO:0030667; GO:0030133	VGF	381677	TRUE	0.294233	0.00142016	0.0440398	chr5
ENSMUSG00000024798	ENSMUST00000164639; ENSMUST00000165215; ENSMUST00000164781; ENSMUST00000166074; ENSMUST00000170360; ENSMUST00000099505	Htr7	protein_coding	protein_coding	5-hydroxytryptamine (serotonin) receptor 7 [Source:MGI Symbol;Acc:MGI:99841]	0.5205	2670	GO:0007186; GO:0060291; GO:0010976; GO:0007268; GO:0007165; GO:0007187; GO:0098664; GO:0007613; GO:0007623; GO:0042310; GO:0006939; GO:0071542; GO:0048266; GO:0050966; GO:2000300; GO:0042322; GO:0007192; GO:0007210; GO:0014063; GO:0014832; GO:0051412; GO:0060073; GO:0062086	GO:0004930; GO:0030594; GO:0004993	GO:0016021; GO:0016020; GO:0005886; GO:0005887; GO:0043025; GO:0030425; GO:0043679; GO:0008021; GO:0099056; GO:0099055; GO:0005791; GO:0045202	HTR7	15566	TRUE	-0.169896	0.00142118	0.0440398	chr19
ENSMUSG00000027009	ENSMUST00000155105; ENSMUST00000099972; ENSMUST00000141094; ENSMUST00000135919; ENSMUST00000126312	Itga4	protein_coding	protein_coding	integrin alpha 4 [Source:MGI Symbol;Acc:MGI:96603]	0.452	3670	GO:0007155; GO:0007229; GO:0002687; GO:0003366; GO:0007159; GO:0007160; GO:0033631; GO:0034113; GO:0034446; GO:0035987; GO:0043113; GO:0050901; GO:0050904; GO:0060385; GO:0071345; GO:0090074; GO:0098657; GO:0140039; GO:1903039; GO:1903238; GO:1904646; GO:1905564; GO:1990138; GO:1990771; GO:2000353; GO:2000406	GO:0001968; GO:0003823; GO:0019960; GO:0050839; GO:1990405	GO:0016020; GO:0016021; GO:0008305; GO:0005886; GO:0009986; GO:0030426; GO:0034669; GO:0043025; GO:0070062	ITGA4	16401	TRUE	-0.465026	0.00142142	0.0440398	chr2
ENSMUSG00000053007	ENSMUST00000205222; ENSMUST00000203528; ENSMUST00000205200; ENSMUST00000204143; ENSMUST00000204861; ENSMUST00000204748; ENSMUST00000204245; ENSMUST00000203575; ENSMUST00000204136; ENSMUST00000211679; ENSMUST00000203487; ENSMUST00000047450; ENSMUST00000205120; ENSMUST00000204096; ENSMUST00000203641	Creb5	protein_coding	protein_coding	cAMP responsive element binding protein 5 [Source:MGI Symbol;Acc:MGI:2443973]	0.4777	2843	GO:0006355; GO:0045893	GO:0003700; GO:0003677; GO:1990837	GO:0005634	CREB5	231991	TRUE	0.298501	0.00143098	0.044242	chr6
ENSMUSG00000026269	ENSMUST00000027487; ENSMUST00000179854; ENSMUST00000180306; ENSMUST00000178116; ENSMUST00000179993; ENSMUST00000178816; ENSMUST00000179127; ENSMUST00000178662; ENSMUST00000178361; ENSMUST00000179837; ENSMUST00000178778; ENSMUST00000179531	Rnpepl1	protein_coding	protein_coding	arginyl aminopeptidase (aminopeptidase B)-like 1 [Source:MGI Symbol;Acc:MGI:1914170]	0.5988	1856	GO:0006508	GO:0008270; GO:0008237; GO:0046872; GO:0016787; GO:0008233; GO:0004177; GO:0070006		RNPEPL1	108657	TRUE	0.189266	0.001443	0.0443619	chr1
ENSMUSG00000021508	ENSMUST00000224801; ENSMUST00000021970	Cxcl14	protein_coding	protein_coding	chemokine (C-X-C motif) ligand 14 [Source:MGI Symbol;Acc:MGI:1888514]	0.5455	1647	GO:0006955; GO:0007165; GO:0060326; GO:0031640; GO:0061844; GO:0048839; GO:0045662; GO:2000503	GO:0008009; GO:0005125	GO:0005576; GO:0005615; GO:0005794	CXCL14	57266	TRUE	0.235073	0.00144392	0.0443619	chr13
ENSMUSG00000039701	ENSMUST00000090379; ENSMUST00000198814; ENSMUST00000199329; ENSMUST00000197934; ENSMUST00000197314; ENSMUST00000199923; ENSMUST00000197801; ENSMUST00000199401; ENSMUST00000197358; ENSMUST00000200188	Usp53	protein_coding	protein_coding	ubiquitin specific peptidase 53 [Source:MGI Symbol;Acc:MGI:2139607]	0.4355	2277	GO:0016579; GO:0007605; GO:0051402; GO:0010996; GO:1904019; GO:0001508; GO:1905584	GO:0004843; GO:0005515	GO:0070161; GO:0005911; GO:0005923	USP53	99526	TRUE	-0.277865	0.001444	0.0443619	chr3
ENSMUSG00000035642	ENSMUST00000178078; ENSMUST00000042627; ENSMUST00000136757; ENSMUST00000072725; ENSMUST00000126085; ENSMUST00000154853; ENSMUST00000140805; ENSMUST00000124552; ENSMUST00000144858; ENSMUST00000138060; ENSMUST00000154779; ENSMUST00000146605; ENSMUST00000135998; ENSMUST00000151840; ENSMUST00000205430	Aamdc	protein_coding	protein_coding	adipogenesis associated Mth938 domain containing [Source:MGI Symbol;Acc:MGI:1913523]	0.5024	769	GO:0043066; GO:0045944; GO:0006366; GO:0045600	GO:0003674	GO:0005737; GO:0016020; GO:0016021	AAMDC	66273	TRUE	0.260269	0.00144802	0.0443917	chr7
ENSMUSG00000060450	ENSMUST00000235812; ENSMUST00000170811; ENSMUST00000072376; ENSMUST00000238031; ENSMUST00000237903; ENSMUST00000236116; ENSMUST00000236353; ENSMUST00000237824; ENSMUST00000236982; ENSMUST00000235549; ENSMUST00000236690; ENSMUST00000236032; ENSMUST00000236649; ENSMUST00000237416; ENSMUST00000237089; ENSMUST00000237211; ENSMUST00000171461; ENSMUST00000235811; ENSMUST00000236319; ENSMUST00000235491;…	Rnf14	protein_coding	protein_coding	ring finger protein 14 [Source:MGI Symbol;Acc:MGI:1929668]	0.4868	1199	GO:0016567; GO:0000209; GO:0006511; GO:0045893; GO:0006355; GO:0032436; GO:0060765	GO:0016740; GO:0046872; GO:0061630; GO:0004842; GO:0005515; GO:0031624; GO:0050681; GO:0019787	GO:0005634; GO:0005829; GO:0005737; GO:0005654; GO:0000151	RNF14	56736	TRUE	-0.102582	0.00145309	0.0444471	chr18
ENSMUSG00000015149	ENSMUST00000122915; ENSMUST00000072965; ENSMUST00000170068; ENSMUST00000155327; ENSMUST00000207322; ENSMUST00000141077; ENSMUST00000153956; ENSMUST00000132789; ENSMUST00000127953; ENSMUST00000128961	Sirt2	protein_coding	protein_coding	sirtuin 2 [Source:MGI Symbol;Acc:MGI:1927664]	0.5496	1263	GO:0043066; GO:0071456; GO:0000122; GO:0043491; GO:0045598; GO:0051726; GO:0008285; GO:0031641; GO:0045944; GO:0007399; GO:0006914; GO:0043161; GO:0051321; GO:0030154; GO:0007049; GO:0051301; GO:0051781; GO:0045892; GO:0022011; GO:0042177; GO:0099149; GO:0035601; GO:0006476; GO:0016575; GO:0034599; GO:0014065; GO:0048715; GO:0010507; GO:1900425; GO:0070932; GO:0070933; GO:1900119; GO:0045599; GO:…	GO:0070403; GO:0003682; GO:0016740; GO:0046872; GO:0005515; GO:0004407; GO:0051287; GO:0008270; GO:0140297; GO:0017136; GO:0033558; GO:0034979; GO:0042826; GO:0043130; GO:0035035; GO:0140773; GO:0140774; GO:0042903; GO:0046970; GO:0003950	GO:0005739; GO:0005634; GO:0005730; GO:0005829; GO:0005737; GO:0016020; GO:0005886; GO:0005694; GO:0005815; GO:0005856; GO:0030426; GO:0042995; GO:0043204; GO:0005874; GO:0048471; GO:0005819; GO:0030496; GO:0098978; GO:0005814; GO:0005813; GO:0033270; GO:0033010; GO:0043209; GO:0072686; GO:0000792; GO:0097386; GO:0043220; GO:0035748; GO:0044224; GO:0072687; GO:0043219; GO:0097456	SIRT2	64383	TRUE	0.165929	0.00145593	0.0444471	chr7
ENSMUSG00000074743	ENSMUST00000099270	Thbd	protein_coding	protein_coding	thrombomodulin [Source:MGI Symbol;Acc:MGI:98736]	0.5136	3723	GO:0007565; GO:0007596; GO:0007599; GO:0010165; GO:0030195; GO:0032496; GO:0050819; GO:0051591	GO:0005509; GO:0004888	GO:0016021; GO:0016020; GO:0005886; GO:0005615; GO:0009897; GO:0005887; GO:0009986; GO:1905370; GO:0005774; GO:0016327	THBD	21824	TRUE	0.298105	0.00147554	0.0448949	chr2
ENSMUSG00000015766	ENSMUST00000058210; ENSMUST00000100841; ENSMUST00000111878; ENSMUST00000147526; ENSMUST00000127179; ENSMUST00000132920; ENSMUST00000152046; ENSMUST00000146442; ENSMUST00000153933; ENSMUST00000203515; ENSMUST00000139753; ENSMUST00000134630; ENSMUST00000205037	Eps8	protein_coding	protein_coding	epidermal growth factor receptor pathway substrate 8 [Source:MGI Symbol;Acc:MGI:104684]	0.4849	1930	GO:1990830; GO:0008344; GO:0008360; GO:0051016; GO:0051017; GO:0035023; GO:0031532; GO:0016601; GO:0007266; GO:0099072; GO:0048149; GO:0036336; GO:0070358; GO:0010458; GO:0030832; GO:0051764; GO:1900029	GO:0005515; GO:0003779; GO:0035591; GO:0031267	GO:0045202; GO:0014069; GO:0005737; GO:0016020; GO:0005886; GO:0110165; GO:0030426; GO:0042995; GO:0043005; GO:0005938; GO:0098978; GO:0032587; GO:0005829; GO:0032420; GO:0017146; GO:0005903; GO:0032421; GO:0032426	EPS8	13860	TRUE	-0.215865	0.00147676	0.0448949	chr6
ENSMUSG00000006651	ENSMUST00000006828; ENSMUST00000208792; ENSMUST00000208404; ENSMUST00000207514; ENSMUST00000209054	Aplp1	protein_coding	protein_coding	amyloid beta (A4) precursor-like protein 1 [Source:MGI Symbol;Acc:MGI:88046]	0.593	1320	GO:0006417; GO:0007155; GO:0006915; GO:0006897; GO:0030198; GO:0006378; GO:0007417; GO:0030900; GO:0106072; GO:0007409; GO:0071874	GO:0008201; GO:0046914; GO:0005515; GO:0046872; GO:0042802; GO:0031694; GO:0031696; GO:0031695	GO:0005654; GO:0005737; GO:0016020; GO:0016021; GO:0005794; GO:0005886; GO:0048471	APLP1	11803	TRUE	0.151338	0.00148388	0.044997	chr7
ENSMUSG00000074922	ENSMUST00000099556	Fam122a	protein_coding	protein_coding	family with sequence similarity 122, member A [Source:MGI Symbol;Acc:MGI:1915284]	0.5942	855	GO:0030307; GO:0043086; GO:0032436; GO:0044818	GO:0004864; GO:0004865	GO:0005634; GO:0005737		68034	TRUE	0.221001	0.0014863	0.044997	chr19
ENSMUSG00000035805	ENSMUST00000042594; ENSMUST00000109368	Mlc1	protein_coding	protein_coding	megalencephalic leukoencephalopathy with subcortical cysts 1 homolog (human) [Source:MGI Symbol;Acc:MGI:2157910]	0.5196	2792	GO:0006811; GO:0016192; GO:0071397; GO:0015031; GO:0032388; GO:0047484; GO:0072584	GO:0005515; GO:0044877; GO:0042802	GO:0005829; GO:0005737; GO:0016020; GO:0016021; GO:0005886; GO:0005783; GO:0048471; GO:0016324; GO:0005911; GO:0005768; GO:0031410; GO:0016323; GO:0005769; GO:0055037; GO:0045121; GO:0005764; GO:0005901; GO:0097450	MLC1	170790	TRUE	0.156427	0.00149607	0.0451986	chr15
ENSMUSG00000034353	ENSMUST00000165855; ENSMUST00000188475; ENSMUST00000097648	Ramp1	protein_coding	protein_coding	receptor (calcitonin) activity modifying protein 1 [Source:MGI Symbol;Acc:MGI:1858418]	0.5582	1296	GO:0006886; GO:0008277; GO:0001525; GO:0007186; GO:0015031; GO:0072659; GO:0006816; GO:0032092; GO:0007189; GO:0031623; GO:0097647; GO:0060050; GO:0032870; GO:1990408	GO:0015026; GO:0001635; GO:0097643; GO:1990407	GO:0016021; GO:0016020; GO:0005886; GO:0005615; GO:0009986; GO:0043235; GO:0150056; GO:1990406	RAMP1	51801	TRUE	0.259405	0.00150438	0.0453556	chr1
ENSMUSG00000055884	ENSMUST00000223051; ENSMUST00000058889; ENSMUST00000222540; ENSMUST00000223401; ENSMUST00000221937; ENSMUST00000222521; ENSMUST00000221838; ENSMUST00000222086; ENSMUST00000221175	Fancm	protein_coding	protein_coding	Fanconi anemia, complementation group M [Source:MGI Symbol;Acc:MGI:2442306]	0.4351	2653	GO:0031297; GO:0090305; GO:0006281; GO:0006974; GO:0032508; GO:0000712; GO:0036297; GO:1902527; GO:0045003; GO:0071932	GO:0003677; GO:0005524; GO:0016787; GO:0004518; GO:0003682; GO:0000166; GO:0003724; GO:0004386; GO:0016887; GO:0043138; GO:0009378; GO:0000400	GO:0000785; GO:0005654; GO:0005634; GO:0043240; GO:0071821	FANCM	104806	TRUE	-0.264226	0.00150798	0.0453702	chr12
ENSMUSG00000034892	ENSMUST00000037023; ENSMUST00000094291	Rps29	protein_coding	protein_coding	ribosomal protein S29 [Source:MGI Symbol;Acc:MGI:107681]	0.5203	425	GO:0006412; GO:0002181	GO:0003735; GO:0008270; GO:0046872	GO:0005840; GO:0005737; GO:0110165; GO:0005783; GO:0005829; GO:1990904; GO:0005791; GO:0022627; GO:0042788; GO:0098556	RPS29	20090	TRUE	0.184561	0.0015496	0.0465159	chr12
ENSMUSG00000000275	ENSMUST00000100627; ENSMUST00000107896; ENSMUST00000000284	Trim25	protein_coding	protein_coding	tripartite motif-containing 25 [Source:MGI Symbol;Acc:MGI:102749]	0.516	4196	GO:1990830; GO:0043627; GO:0016567; GO:0051607; GO:0002376; GO:0045087; GO:0051092; GO:0032880; GO:0045893; GO:0051091; GO:0006513; GO:0006511; GO:0030433; GO:0043123; GO:0046596; GO:0019076; GO:0044790; GO:0033280; GO:0046597	GO:0046872; GO:0005515; GO:0016740; GO:0004842; GO:0016874; GO:0003713; GO:0061630; GO:0039552	GO:0005829; GO:0005737; GO:0016604; GO:0005654; GO:0005634; GO:0010494	TRIM25	217069	TRUE	0.320587	0.00155245	0.0465159	chr11
ENSMUSG00000049721	ENSMUST00000078757; ENSMUST00000063004; ENSMUST00000109981	Gal3st1	protein_coding	protein_coding	galactose-3-O-sulfotransferase 1 [Source:MGI Symbol;Acc:MGI:1858277]	0.5987	1743	GO:0009247; GO:0042552; GO:0007283; GO:0006629; GO:0006665; GO:0046486; GO:0006682; GO:0006681	GO:0001733; GO:0016740; GO:0003824; GO:0008146; GO:0050694	GO:0016021; GO:0016020; GO:0000139; GO:0005794	GAL3ST1	53897	TRUE	0.305599	0.00155579	0.0465203	chr11
ENSMUSG00000021945	ENSMUST00000223669; ENSMUST00000022511; ENSMUST00000224922; ENSMUST00000225393; ENSMUST00000225282; ENSMUST00000223965; ENSMUST00000226025	Zmym2	protein_coding	protein_coding	zinc finger, MYM-type 2 [Source:MGI Symbol;Acc:MGI:1923257]	0.3975	1934	GO:0045892	GO:0008270; GO:0005515; GO:0046872; GO:0031624	GO:0005634; GO:0016605	ZMYM2	76007	TRUE	-0.233698	0.00155946	0.0465344	chr14
ENSMUSG00000026159	ENSMUST00000189220; ENSMUST00000113444; ENSMUST00000190052; ENSMUST00000063380; ENSMUST00000187899; ENSMUST00000186302; ENSMUST00000190046; ENSMUST00000186043	Agfg1	protein_coding	protein_coding	ArfGAP with FG repeats 1 [Source:MGI Symbol;Acc:MGI:1333754]	0.4656	3020	GO:0045109; GO:0050790; GO:0007283; GO:0030154; GO:0001675; GO:0007289	GO:0005096; GO:0003677; GO:0046872	GO:0005634; GO:0031410; GO:0043231; GO:0005737; GO:0043025; GO:0042995	AGFG1	15463	TRUE	-0.245559	0.00156834	0.0467039	chr1
ENSMUSG00000038702	ENSMUST00000186365; ENSMUST00000035462; ENSMUST00000189731; ENSMUST00000189370	Dsel	protein_coding	protein_coding	dermatan sulfate epimerase-like [Source:MGI Symbol;Acc:MGI:2442948]	0.5074	2562	GO:0030204; GO:0030205	GO:0008146; GO:0016853; GO:0047757	GO:0005575; GO:0016020; GO:0016021	DSEL	319901	TRUE	-0.511544	0.00157305	0.0467486	chr1
ENSMUSG00000038872	ENSMUST00000220518; ENSMUST00000212094; ENSMUST00000221632; ENSMUST00000221100; ENSMUST00000221237; ENSMUST00000188994; ENSMUST00000043896	Zfhx3	protein_coding	protein_coding	zinc finger homeobox 3 [Source:MGI Symbol;Acc:MGI:99948]	0.5148	5536	GO:0006355; GO:0000122; GO:0007420; GO:0045664; GO:0045893; GO:0051726; GO:0071559	GO:0003677; GO:0000981; GO:0008270; GO:0003676; GO:0000978; GO:0001227; GO:0019899	GO:0005634; GO:0005654; GO:0005667; GO:0005737; GO:0016604	ZFHX3	11906	TRUE	-0.273618	0.00157803	0.046801	chr8
ENSMUSG00000028524	ENSMUST00000097948; ENSMUST00000142430; ENSMUST00000066824; ENSMUST00000137592; ENSMUST00000072481; ENSMUST00000156596; ENSMUST00000136164; ENSMUST00000080728; ENSMUST00000140289; ENSMUST00000183855; ENSMUST00000106882; ENSMUST00000149547; ENSMUST00000131431; ENSMUST00000141624; ENSMUST00000140676	Sgip1	protein_coding	protein_coding	SH3-domain GRB2-like (endophilin) interacting protein 1 [Source:MGI Symbol;Acc:MGI:1920344]	0.478	1901	GO:0097009; GO:0072583; GO:0006897; GO:0040018; GO:0002021; GO:0048260; GO:1904000; GO:0048268; GO:2000253	GO:0005515; GO:0008017; GO:0017124; GO:0015631; GO:0005543	GO:0005737; GO:0016020; GO:0005886; GO:0030136; GO:0005905; GO:0098793; GO:0030122	SGIP1	73094	TRUE	-0.20702	0.00158709	0.046974	chr4
ENSMUSG00000050211	ENSMUST00000136845; ENSMUST00000090071; ENSMUST00000127009; ENSMUST00000152263	Pla2g4e	protein_coding	protein_coding	phospholipase A2, group IVE [Source:MGI Symbol;Acc:MGI:1919144]	0.5115	3516	GO:0009395; GO:0006629; GO:0016042; GO:0046475; GO:2001137; GO:0070292	GO:0004620; GO:0016740; GO:0046872; GO:0016787; GO:0005509; GO:0005546; GO:0005547; GO:0010314; GO:0032266; GO:0043325; GO:0070273; GO:0080025; GO:0016410; GO:0004623; GO:0005544; GO:0047498	GO:0005737; GO:0016020; GO:0005886; GO:0005829; GO:0005764; GO:0005768; GO:0005765; GO:0031901	PLA2G4E	329502	TRUE	-0.615179	0.00159622	0.0471227	chr2
ENSMUSG00000029599	ENSMUST00000031598; ENSMUST00000202672; ENSMUST00000201616; ENSMUST00000201698	Ddx54	protein_coding	protein_coding	DEAD box helicase 54 [Source:MGI Symbol;Acc:MGI:1919240]	0.5858	2485	GO:0006396; GO:0016070; GO:0045892; GO:0006364	GO:0003723; GO:0005524; GO:0003676; GO:0003724; GO:0016787; GO:0000166; GO:0004386; GO:0005102; GO:0016887; GO:0003714; GO:0030331	GO:0005634; GO:0005730; GO:0005654; GO:0005794	DDX54	71990	TRUE	0.162749	0.00160101	0.0471227	chr5
ENSMUSG00000046618	ENSMUST00000057279	Olfml2a	protein_coding	protein_coding	olfactomedin-like 2A [Source:MGI Symbol;Acc:MGI:2444741]	0.5146	5579	GO:0007165; GO:0030198	GO:0042802; GO:0050840	GO:0005615; GO:0005576; GO:0031012	OLFML2A	241327	TRUE	0.559654	0.00160341	0.0471227	chr2
ENSMUSG00000004056	ENSMUST00000108344; ENSMUST00000167435; ENSMUST00000128540; ENSMUST00000108342; ENSMUST00000147263; ENSMUST00000138459; ENSMUST00000143499; ENSMUST00000108343; ENSMUST00000051356; ENSMUST00000136962; ENSMUST00000142365; ENSMUST00000085917; ENSMUST00000143347; ENSMUST00000136981	Akt2	protein_coding	protein_coding	thymoma viral proto-oncogene 2 [Source:MGI Symbol;Acc:MGI:104874]	0.5482	1527	GO:0006468; GO:0043066; GO:0010628; GO:0045944; GO:0006006; GO:0008284; GO:0032868; GO:0043491; GO:0043154; GO:0016310; GO:0006417; GO:0035556; GO:0005975; GO:0001934; GO:0008643; GO:0018105; GO:0006915; GO:0005977; GO:0005978; GO:0033138; GO:0072659; GO:0045429; GO:0046326; GO:0090630; GO:2000147; GO:0032869; GO:0010765; GO:0071407; GO:0030335; GO:0090314; GO:0050927; GO:0009967; GO:0008286; GO:…	GO:0005524; GO:0004672; GO:0004674; GO:0016740; GO:0046872; GO:0000166; GO:0016301; GO:0005515; GO:0106310; GO:0005080; GO:0140677	GO:0005739; GO:0005634; GO:0005829; GO:0005654; GO:0005737; GO:0016020; GO:0005886; GO:0032991; GO:0043231; GO:0005768; GO:0005769; GO:0005938; GO:0016529; GO:0032587; GO:0031982; GO:0032593	AKT2	11652	TRUE	0.305354	0.00160506	0.0471227	chr7
ENSMUSG00000025907	ENSMUST00000159906; ENSMUST00000160871; ENSMUST00000027040; ENSMUST00000162210; ENSMUST00000160062; ENSMUST00000162795; ENSMUST00000161327; ENSMUST00000159802; ENSMUST00000162257; ENSMUST00000159206; ENSMUST00000159661; ENSMUST00000161183; ENSMUST00000159349; ENSMUST00000159530; ENSMUST00000162418; ENSMUST00000159656	Rb1cc1	protein_coding	protein_coding	RB1-inducible coiled-coil 1 [Source:MGI Symbol;Acc:MGI:1341850]	0.4029	2024	GO:0000422; GO:0000045; GO:0043066; GO:0006915; GO:0006468; GO:0008285; GO:0007507; GO:0006914; GO:0007049; GO:0001934; GO:0006996; GO:0046330; GO:0001889; GO:0045793; GO:0046777; GO:0061709; GO:2001237; GO:0097191; GO:0034727; GO:0030242; GO:0061723; GO:0010508; GO:1903059	GO:0005515; GO:0019901; GO:0060090	GO:0005634; GO:0005829; GO:0005737; GO:0034045; GO:0005764; GO:0031965; GO:0000407; GO:0019898; GO:0000421; GO:1990316	RB1CC1	12421	TRUE	-0.238378	0.00161216	0.0471241	chr1
ENSMUSG00000026421	ENSMUST00000097561; ENSMUST00000027677	Csrp1	protein_coding	protein_coding	cysteine and glycine-rich protein 1 [Source:MGI Symbol;Acc:MGI:88549]	0.5492	1826	GO:0030036; GO:0045214; GO:0060537	GO:0005515; GO:0046872; GO:0008307; GO:0042805	GO:0005634; GO:0005737; GO:0030018; GO:0015629; GO:0005654	CSRP1	13007	TRUE	0.213598	0.00161597	0.0471241	chr1
ENSMUSG00000040560	ENSMUST00000072726; ENSMUST00000235648; ENSMUST00000236956; ENSMUST00000236879; ENSMUST00000238193; ENSMUST00000235428	Wdr7	protein_coding	protein_coding	WD repeat domain 7 [Source:MGI Symbol;Acc:MGI:1860197]	0.4787	3925	GO:0002244	GO:0005515; GO:0003674	GO:0005737; GO:0008021	WDR7	104082	TRUE	-0.13957	0.00161674	0.0471241	chr18
ENSMUSG00000063953	ENSMUST00000080898	Amd2	protein_coding	protein_coding	S-adenosylmethionine decarboxylase 2 [Source:MGI Symbol;Acc:MGI:1333111]	0.4114	3218	GO:0006597; GO:0008295; GO:0006595; GO:0006596; GO:0046500	GO:0004014; GO:0016829; GO:0042802; GO:0016831; GO:0019810	GO:0005829	AMD1	100041585	TRUE	-1.88437	0.00161805	0.0471241	chr10
ENSMUSG00000051627	ENSMUST00000062045	H1f4	protein_coding	protein_coding	H1.4 linker histone, cluster member [Source:MGI Symbol;Acc:MGI:1931527]	0.5119	1930	GO:0006334; GO:0000122; GO:0006357; GO:0006325; GO:0080182; GO:0098532; GO:0030261; GO:0045910	GO:0003677; GO:0005515; GO:0030527; GO:0005524; GO:0005509; GO:0005525; GO:0003690; GO:0031490; GO:0016208; GO:0043531; GO:0000166; GO:0032564; GO:0031492	GO:0000786; GO:0005634; GO:0005694; GO:0000792	H1-4	50709	TRUE	0.76787	0.00162154	0.0471315	chr13
ENSMUSG00000039298	ENSMUST00000144099; ENSMUST00000076541; ENSMUST00000138561; ENSMUST00000124251; ENSMUST00000140108; ENSMUST00000126416	Cdk5rap2	protein_coding	protein_coding	CDK5 regulatory subunit associated protein 2 [Source:MGI Symbol;Acc:MGI:2384875]	0.4798	3346	GO:0045893; GO:0000226; GO:0090266; GO:0000132; GO:0022008; GO:0045665; GO:0007059; GO:0007099; GO:0045736; GO:0007098; GO:0007420; GO:0001578; GO:0031116; GO:0031023; GO:0046600	GO:0044877; GO:0000976; GO:0005516; GO:0005515; GO:0019901; GO:0008017; GO:0015631; GO:0043015	GO:0005815; GO:0005829; GO:0005737; GO:0005794; GO:0048471; GO:0005856; GO:0030054; GO:0005874; GO:0005813; GO:0000242; GO:0000922; GO:0097431; GO:0035371; GO:0000931	CDK5RAP2	214444	TRUE	0.189818	0.00163695	0.0474847	chr4
ENSMUSG00000024885	ENSMUST00000051803; ENSMUST00000237391	Aldh3b1	protein_coding	protein_coding	aldehyde dehydrogenase 3 family, member B1 [Source:MGI Symbol;Acc:MGI:1914939]	0.5706	1320	GO:0006629; GO:0006081; GO:0034599; GO:0006068; GO:0006979; GO:0046185	GO:0016491; GO:0016620; GO:0004029; GO:0004030; GO:0018479; GO:0018477; GO:0033721	GO:0005829; GO:0005737; GO:0016020; GO:0005886	ALDH3B1	67689	TRUE	0.365682	0.00164414	0.0475983	chr19
ENSMUSG00000028528	ENSMUST00000154120; ENSMUST00000106930; ENSMUST00000038207; ENSMUST00000149047; ENSMUST00000106929; ENSMUST00000146489; ENSMUST00000094953; ENSMUST00000106933	Dnajc6	protein_coding	protein_coding	DnaJ heat shock protein family (Hsp40) member C6 [Source:MGI Symbol;Acc:MGI:1919935]	0.4815	3616	GO:0016311; GO:0072583; GO:0072318; GO:2000369; GO:0016191	GO:0016791; GO:0016787; GO:0004721; GO:0004725; GO:0017124; GO:0030276	GO:0045202; GO:0014069; GO:0043231; GO:0005737; GO:0098793; GO:0031982	DNAJC6	72685	TRUE	-0.144405	0.00165322	0.0477662	chr4
ENSMUSG00000005268	ENSMUST00000005400; ENSMUST00000145428; ENSMUST00000137867; ENSMUST00000124470; ENSMUST00000132361; ENSMUST00000138135; ENSMUST00000130720; ENSMUST00000128450; ENSMUST00000148257; ENSMUST00000128921; ENSMUST00000134410; ENSMUST00000127467	Prlr	protein_coding	protein_coding	prolactin receptor [Source:MGI Symbol;Acc:MGI:97763]	0.4443	2512	GO:0043066; GO:0009617; GO:0097011; GO:0007259; GO:0060644; GO:0019221; GO:0030890; GO:0008284; GO:0007171; GO:0120162; GO:0007595; GO:0061180; GO:0038161; GO:0042976; GO:0030155; GO:0051179; GO:0060736; GO:0038165; GO:0048861; GO:0060749; GO:0031954; GO:0030856	GO:0005515; GO:0046872; GO:0004896; GO:0019901; GO:0008289; GO:0019955; GO:0004925; GO:0017046; GO:0004924; GO:0004923; GO:0005127	GO:0016020; GO:0016021; GO:0009897; GO:0009986; GO:0043235	PRLR	19116	TRUE	-0.388593	0.00165947	0.0478502	chr15
ENSMUSG00000017404	ENSMUST00000092425; ENSMUST00000017548; ENSMUST00000134435	Rpl19	protein_coding	protein_coding	ribosomal protein L19 [Source:MGI Symbol;Acc:MGI:98020]	0.504	615	GO:0006412; GO:0002181	GO:0003735; GO:0003723; GO:0070180; GO:1990932	GO:0005840; GO:1990904; GO:0022625; GO:0005730; GO:0005829; GO:0005737; GO:0045202; GO:0022626; GO:0042788	RPL19	19921	TRUE	0.143774	0.00166464	0.0478502	chr11
ENSMUSG00000036323	ENSMUST00000101087; ENSMUST00000120550; ENSMUST00000150661; ENSMUST00000148423; ENSMUST00000141873; ENSMUST00000125732; ENSMUST00000146167; ENSMUST00000132860; ENSMUST00000144741	Srp72	protein_coding	protein_coding	signal recognition particle 72 [Source:MGI Symbol;Acc:MGI:1333795]	0.4401	1364	GO:0006614	GO:0005515; GO:0008312; GO:0043022; GO:0005047; GO:0030911	GO:0048500; GO:0005730; GO:0005737; GO:0005783; GO:1990904; GO:0005786	SRP72	66661	TRUE	-0.135946	0.00166819	0.0478502	chr5
ENSMUSG00000027663	ENSMUST00000029199; ENSMUST00000168566; ENSMUST00000139660; ENSMUST00000195055	Zmat3	protein_coding	protein_coding	zinc finger matrin type 3 [Source:MGI Symbol;Acc:MGI:1195270]	0.507	4930		GO:0008270; GO:0046872; GO:0003676	GO:0005634; GO:0005654; GO:0005886	ZMAT3	22401	TRUE	-0.12439	0.00166927	0.0478502	chr3
ENSMUSG00000029798	ENSMUST00000031817; ENSMUST00000203840; ENSMUST00000204455; ENSMUST00000203506; ENSMUST00000204843; ENSMUST00000204166	Herc6	protein_coding	protein_coding	hect domain and RLD 6 [Source:MGI Symbol;Acc:MGI:1914388]	0.4077	1988	GO:0009617; GO:0006511; GO:0016567; GO:0002376; GO:0045087; GO:0002244	GO:0004842; GO:0016740; GO:0030332; GO:0061630	GO:0005829; GO:0005737; GO:0005654	HERC6	67138	TRUE	-0.27751	0.00168306	0.0479426	chr6
ENSMUSG00000047797	ENSMUST00000119080; ENSMUST00000052130; ENSMUST00000119190	Gjb1	protein_coding	protein_coding	gap junction protein, beta 1 [Source:MGI Symbol;Acc:MGI:95719]	0.5646	1554	GO:0007154; GO:0055085; GO:0007267; GO:0015868; GO:1905867	GO:0042802; GO:0005243	GO:0005922; GO:0005737; GO:0016020; GO:0016021; GO:0005886; GO:0032991; GO:0070161; GO:0016328; GO:0005921	GJB1	14618	TRUE	0.336032	0.0016845	0.0479426	chrX
ENSMUSG00000023010	ENSMUST00000023749; ENSMUST00000160635; ENSMUST00000161250; ENSMUST00000229392; ENSMUST00000161778; ENSMUST00000159209; ENSMUST00000162624; ENSMUST00000159531; ENSMUST00000162274; ENSMUST00000231147; ENSMUST00000160454; ENSMUST00000231173	Tmbim6	protein_coding	protein_coding	transmembrane BAX inhibitor motif containing 6 [Source:MGI Symbol;Acc:MGI:99682]	0.5232	971	GO:0043066; GO:0006914; GO:0006986; GO:0006915; GO:0032469; GO:0070059; GO:0032091; GO:2001234; GO:0034976; GO:1902236; GO:1990441; GO:1903298; GO:0010523; GO:0034620; GO:0060702; GO:0033119; GO:1902065; GO:0002638; GO:0036483	GO:0019899; GO:0031625; GO:0060698	GO:0016021; GO:0005737; GO:0016020; GO:0005783; GO:0005789; GO:0031966	TMBIM6	110213	TRUE	0.112474	0.00168679	0.0479426	chr15
ENSMUSG00000056629	ENSMUST00000070878; ENSMUST00000177752; ENSMUST00000238181; ENSMUST00000237119	Fkbp2	protein_coding	protein_coding	FK506 binding protein 2 [Source:MGI Symbol;Acc:MGI:95542]	0.5999	928	GO:0061077; GO:0000413	GO:0003755; GO:0016853	GO:0016020; GO:0005783; GO:0005789	FKBP2	14227	TRUE	0.1818	0.00168759	0.0479426	chr19
ENSMUSG00000020946	ENSMUST00000021329; ENSMUST00000107013; ENSMUST00000145265	Gosr2	protein_coding	protein_coding	golgi SNAP receptor complex member 2 [Source:MGI Symbol;Acc:MGI:1927204]	0.5204	1742	GO:0015031; GO:0016192; GO:0006891; GO:0006906; GO:0061025	GO:0005484; GO:0000149	GO:0005737; GO:0016020; GO:0016021; GO:0000139; GO:0005794; GO:0005783; GO:0005789; GO:0031201; GO:0012507; GO:0031902	GOSR2	56494	TRUE	0.120005	0.00168896	0.0479426	chr11
ENSMUSG00000049606	ENSMUST00000112696; ENSMUST00000045466; ENSMUST00000112698; ENSMUST00000112695; ENSMUST00000112694; ENSMUST00000125895; ENSMUST00000127434; ENSMUST00000137285; ENSMUST00000122980; ENSMUST00000155495; ENSMUST00000124263; ENSMUST00000135108; ENSMUST00000200481; ENSMUST00000142391; ENSMUST00000127572; ENSMUST00000148192; ENSMUST00000127932; ENSMUST00000156851	Zfp644	protein_coding	protein_coding	zinc finger protein 644 [Source:MGI Symbol;Acc:MGI:1277212]	0.4527	2141	GO:0006357	GO:0000978; GO:0000981; GO:0001222	GO:0005634	ZNF644	52397	TRUE	-0.164874	0.0017044	0.0482869	chr5
ENSMUSG00000040407	ENSMUST00000132058; ENSMUST00000143365; ENSMUST00000141817; ENSMUST00000044492; ENSMUST00000140977; ENSMUST00000198973; ENSMUST00000177448; ENSMUST00000123119; ENSMUST00000133952; ENSMUST00000238634; ENSMUST00000196350; ENSMUST00000196918; ENSMUST00000176863; ENSMUST00000197366; ENSMUST00000147629; ENSMUST00000196837	Akap9	protein_coding	protein_coding	A kinase (PRKA) anchor protein (yotiao) 9 [Source:MGI Symbol;Acc:MGI:2178217]	0.4448	1843	GO:0007165; GO:0007020; GO:0007194; GO:0031116; GO:0031503; GO:0033138; GO:0051602; GO:0051661; GO:0060306; GO:0060307; GO:0071320; GO:0086091; GO:0098909; GO:0098962; GO:1901018; GO:1903358	GO:0060090; GO:0015459; GO:0034237; GO:0044325	GO:0005737; GO:0005815; GO:0005856; GO:0005794; GO:0005795; GO:0005801; GO:0005813; GO:0008076; GO:0034705; GO:0043025; GO:0043231; GO:0044307; GO:0097060; GO:0098978; GO:0099147	AKAP9	100986	TRUE	-0.237166	0.00170972	0.0483435	chr5
ENSMUSG00000018678	ENSMUST00000107624; ENSMUST00000107623; ENSMUST00000062652	Sp2	protein_coding	protein_coding	Sp2 transcription factor [Source:MGI Symbol;Acc:MGI:1926162]	0.5674	2776	GO:0035264; GO:0000122	GO:0000978; GO:0001227; GO:0042826; GO:1990837	GO:0005654	SP2	78912	TRUE	0.23449	0.00171792	0.0484813	chr11
ENSMUSG00000020917	ENSMUST00000107389; ENSMUST00000007131; ENSMUST00000165111; ENSMUST00000154151; ENSMUST00000152969; ENSMUST00000154888; ENSMUST00000107385	Acly	protein_coding	protein_coding	ATP citrate lyase [Source:MGI Symbol;Acc:MGI:103251]	0.5271	2383	GO:0006629; GO:0006085; GO:0006101; GO:0006107; GO:0008610; GO:0006084; GO:0006633	GO:0003824; GO:0046912; GO:0016740; GO:0046872; GO:0000166; GO:0005524; GO:0003878; GO:0005515	GO:0005737; GO:0005829; GO:0005654; GO:0005739	ACLY	104112	TRUE	-0.111031	0.00172924	0.0486507	chr11
ENSMUSG00000037138	ENSMUST00000095027; ENSMUST00000238906; ENSMUST00000039827; ENSMUST00000136641; ENSMUST00000027250; ENSMUST00000134963	Aff3	protein_coding	protein_coding	AF4/FMR2 family, member 3 [Source:MGI Symbol;Acc:MGI:106927]	0.5256	3481	GO:0010468; GO:0006351; GO:0006355; GO:0035116; GO:0034612	GO:0003677; GO:0003700; GO:0003690	GO:0005634; GO:0005829; GO:0016604; GO:0005654; GO:0032783	AFF3	16764	TRUE	-0.151929	0.00173112	0.0486507	chr1
ENSMUSG00000000948	ENSMUST00000179360; ENSMUST00000191456; ENSMUST00000191491	Gm38393	protein_coding	protein_coding	predicted gene, 38393 [Source:MGI Symbol;Acc:MGI:5613898]	0.3729	1823		GO:0051117	GO:0005634; GO:0016607			TRUE	-0.341893	0.00173395	0.0486507	chr7
ENSMUSG00000042348	ENSMUST00000091201; ENSMUST00000224858; ENSMUST00000224068	Arl15	protein_coding	protein_coding	ADP-ribosylation factor-like 15 [Source:MGI Symbol;Acc:MGI:2442308]	0.4568	2111	GO:0008150	GO:0005525; GO:0003924; GO:0003674; GO:0000166		ARL15	218639	TRUE	-0.25107	0.00174525	0.0487763	chr13
ENSMUSG00000032293	ENSMUST00000034843; ENSMUST00000214023; ENSMUST00000213482	Ireb2	protein_coding	protein_coding	iron responsive element binding protein 2 [Source:MGI Symbol;Acc:MGI:1928268]	0.3971	3462	GO:0009791; GO:0010468; GO:0017148; GO:0090650; GO:0006417; GO:0051649; GO:0006879; GO:0071364; GO:0006099; GO:0050892; GO:0055072; GO:0071283; GO:0034101; GO:0006101; GO:0006782; GO:0071287; GO:0030316; GO:0010041; GO:0072705	GO:0003723; GO:0046872; GO:0051536; GO:0051539; GO:0030350; GO:0030371; GO:0001069; GO:0003994	GO:0005739; GO:0005829; GO:0005737; GO:0030424; GO:0005794; GO:0005783; GO:0043025	IREB2	64602	TRUE	-0.215096	0.00174687	0.0487763	chr9
ENSMUSG00000045648	ENSMUST00000053922; ENSMUST00000159205; ENSMUST00000161937; ENSMUST00000162182	Vwc2l	protein_coding	protein_coding	von Willebrand factor C domain-containing protein 2-like [Source:MGI Symbol;Acc:MGI:2444069]	0.4207	3591	GO:0030514; GO:0045666	GO:0005515; GO:0003674	GO:0005615; GO:0045202; GO:0005576; GO:0032281	VWC2L	320460	TRUE	-0.261099	0.00174847	0.0487763	chr1
ENSMUSG00000056608	ENSMUST00000048665; ENSMUST00000209474; ENSMUST00000211034; ENSMUST00000109614; ENSMUST00000211215; ENSMUST00000209531; ENSMUST00000211795; ENSMUST00000211403; ENSMUST00000209203; ENSMUST00000209423; ENSMUST00000210947; ENSMUST00000209746; ENSMUST00000209341; ENSMUST00000210887; ENSMUST00000211552	Chd9	protein_coding	protein_coding	chromodomain helicase DNA binding protein 9 [Source:MGI Symbol;Acc:MGI:1924001]	0.4631	4083	GO:0008150; GO:0006325; GO:0006338	GO:0005515; GO:0005524; GO:0140658; GO:0003674; GO:0003677; GO:0016787; GO:0000166; GO:0004386; GO:0016887	GO:0005829; GO:0005654; GO:0005634; GO:0005737	CHD9	109151	TRUE	-0.157473	0.00176158	0.0490481	chr8
ENSMUSG00000048280	ENSMUST00000137496; ENSMUST00000220552; ENSMUST00000175821; ENSMUST00000110973; ENSMUST00000125495; ENSMUST00000175678; ENSMUST00000223721	Zfp738	protein_coding	protein_coding	zinc finger protein 738 [Source:MGI Symbol;Acc:MGI:3040706]	0.429	2779	GO:0006355; GO:0006357; GO:0045944	GO:0046872; GO:0000978; GO:0001228	GO:0005634	ZNF107,ZNF208,ZNF729,ZNF850,ZNF91,ZNF99	408068	TRUE	-0.26203	0.00177926	0.0494457	chr13
ENSMUSG00000030882	ENSMUST00000145988; ENSMUST00000128388; ENSMUST00000106776	Dnhd1	protein_coding	protein_coding	dynein heavy chain domain 1 [Source:MGI Symbol;Acc:MGI:1924755]	0.4806	5498	GO:0007018; GO:0003341; GO:0030317; GO:0120316	GO:0005524; GO:0008569; GO:0045505; GO:0051959	GO:0030286; GO:0036156; GO:0005930; GO:0097729; GO:0036126	DNHD1	77505	TRUE	-0.580168	0.00178997	0.0496111	chr7
ENSMUSG00000021094	ENSMUST00000221750; ENSMUST00000021512; ENSMUST00000220821; ENSMUST00000221674	Dhrs7	protein_coding	protein_coding	dehydrogenase/reductase (SDR family) member 7 [Source:MGI Symbol;Acc:MGI:1913625]	0.4928	1510	GO:0042572	GO:0016491; GO:0016616; GO:0004090; GO:0052650	GO:0016020; GO:0005783; GO:0005789	DHRS7	66375	TRUE	0.185065	0.00179202	0.0496111	chr12
ENSMUSG00000018199	ENSMUST00000159879; ENSMUST00000018343	Ro60	protein_coding	protein_coding	Ro60, Y RNA binding protein [Source:MGI Symbol;Acc:MGI:106652]	0.395	6536	GO:0010468; GO:0030030; GO:0035457; GO:0007224; GO:0060271; GO:0009411; GO:0002520	GO:0003723; GO:0046872; GO:0030620; GO:0034336	GO:0005634; GO:1990904; GO:0005829; GO:0005737; GO:0016604; GO:0005654	RO60	20822	TRUE	-0.24164	0.00179722	0.0496606	chr1
ENSMUSG00000058420	ENSMUST00000081574; ENSMUST00000203465; ENSMUST00000203796; ENSMUST00000203485; ENSMUST00000207034; ENSMUST00000207650	Syt17	protein_coding	protein_coding	synaptotagmin XVII [Source:MGI Symbol;Acc:MGI:104966]	0.5428	2060	GO:0030154; GO:0006887; GO:0016192; GO:0014059; GO:0017156; GO:0017158; GO:0071277; GO:1903861	GO:0005509; GO:0001786; GO:0000149; GO:0005544; GO:0030276; GO:0019905	GO:0016020; GO:0005886; GO:0005802; GO:0070382	SYT17	110058	TRUE	-0.438609	0.00180744	0.0498483	chr7
ENSMUSG00000044465	ENSMUST00000179474; ENSMUST00000211549; ENSMUST00000137158; ENSMUST00000048079; ENSMUST00000118726; ENSMUST00000074686; ENSMUST00000122327; ENSMUST00000210448; ENSMUST00000142559; ENSMUST00000210972; ENSMUST00000211013; ENSMUST00000136298; ENSMUST00000210341	Fhip1b	protein_coding	protein_coding	FHF complex subunit HOOK interacting protein 1B [Source:MGI Symbol;Acc:MGI:1921599]	0.5599	2475	GO:0015031; GO:0007032; GO:0008333; GO:0045022; GO:0007040; GO:1905719	GO:0003674	GO:0005829; GO:0070695	FHIP1B	74349	TRUE	-0.163631	0.00181326	0.0499143	chr7
ENSMUSG00000020015	ENSMUST00000215495; ENSMUST00000069965; ENSMUST00000213378; ENSMUST00000214445; ENSMUST00000215286; ENSMUST00000216729	Cdk17	protein_coding	protein_coding	cyclin-dependent kinase 17 [Source:MGI Symbol;Acc:MGI:97517]	0.4961	1580	GO:0006468; GO:0016310; GO:0051726; GO:0000083	GO:0005524; GO:0004672; GO:0016740; GO:0000166; GO:0016301; GO:0004674; GO:0106310; GO:0004693	GO:0005634; GO:0005737	CDK17	237459	TRUE	-0.200096	0.00184297	0.0506364	chr10
ENSMUSG00000045319	ENSMUST00000114942; ENSMUST00000054254; ENSMUST00000126551; ENSMUST00000194054	Proser2	protein_coding	protein_coding	proline and serine rich 2 [Source:MGI Symbol;Acc:MGI:2442238]	0.5445	3141	GO:0008150	GO:0003674	GO:0005575	PROSER2	227545	TRUE	0.368482	0.00185328	0.0508237	chr2
ENSMUSG00000068284	ENSMUST00000119746; ENSMUST00000088356; ENSMUST00000141015; ENSMUST00000169582	Usf3	protein_coding	protein_coding	upstream transcription factor family member 3 [Source:MGI Symbol;Acc:MGI:2685454]	0.4902	6694	GO:0045944; GO:0010719	GO:0046983; GO:0000977; GO:0001228		USF3	207806	TRUE	-0.224838	0.00185797	0.0508567	chr16
ENSMUSG00000002274	ENSMUST00000165838; ENSMUST00000237849; ENSMUST00000236963; ENSMUST00000235925; ENSMUST00000238040; ENSMUST00000235294; ENSMUST00000002344	Metrn	protein_coding	protein_coding	meteorin, glial cell differentiation regulator [Source:MGI Symbol;Acc:MGI:1917333]	0.6116	1228	GO:0060019; GO:0007165; GO:0007399; GO:0030154; GO:0010001; GO:0050772; GO:0007409	GO:0005179	GO:0005615; GO:0005576	METRN	70083	TRUE	0.242491	0.00186295	0.0508973	chr17
ENSMUSG00000043448	ENSMUST00000108793; ENSMUST00000108790	Gjc2	protein_coding	protein_coding	gap junction protein, gamma 2 [Source:MGI Symbol;Acc:MGI:2153060]	0.6216	2178	GO:0007154; GO:0010628; GO:2000134; GO:0001932; GO:0055085; GO:0009636; GO:0007267; GO:0010644; GO:0070447; GO:1904427; GO:0007420	GO:0005243; GO:1903763	GO:0005922; GO:0016020; GO:0016021; GO:0005886; GO:0070161; GO:0043025; GO:0005921; GO:0043204; GO:0033270; GO:0043209; GO:1990769	GJC2	118454	TRUE	0.380117	0.00186941	0.0509781	chr11
ENSMUSG00000033014	ENSMUST00000029444; ENSMUST00000106860; ENSMUST00000197779; ENSMUST00000196678; ENSMUST00000198969; ENSMUST00000198706; ENSMUST00000197365	Trim33	protein_coding	protein_coding	tripartite motif-containing 33 [Source:MGI Symbol;Acc:MGI:2137357]	0.4108	2923	GO:0016567; GO:0017015; GO:0030514	GO:0005515; GO:0008270; GO:0003677; GO:0046872; GO:0070410; GO:0070412	GO:0005634	TRIM33	94093	TRUE	-0.179683	0.00187337	0.0509906	chr3
ENSMUSG00000076439	ENSMUST00000102665; ENSMUST00000167275	Mog	protein_coding	protein_coding	myelin oligodendrocyte glycoprotein [Source:MGI Symbol;Acc:MGI:97435]	0.5076	1166	GO:0007155		GO:0016020; GO:0016021	MOG	17441	TRUE	0.233569	0.00188762	0.0512826	chr17
ENSMUSG00000031827	ENSMUST00000034285; ENSMUST00000168698; ENSMUST00000211873; ENSMUST00000212676	Cotl1	protein_coding	protein_coding	coactosin-like 1 (Dictyostelium) [Source:MGI Symbol;Acc:MGI:1919292]	0.5918	1045	GO:0030833; GO:0050832	GO:0003779; GO:0005515; GO:0051015; GO:0019899	GO:0005829; GO:0005634; GO:0005737; GO:0005886; GO:0005856; GO:0030864; GO:0005575; GO:0005884	COTL1	72042	TRUE	0.142871	0.00189299	0.0513329	chr8
ENSMUSG00000021242	ENSMUST00000021668; ENSMUST00000223200; ENSMUST00000221056	Npc2	protein_coding	protein_coding	NPC intracellular cholesterol transporter 2 [Source:MGI Symbol;Acc:MGI:1915213]	0.5033	2190	GO:0042632; GO:0032367; GO:0006869; GO:0006629; GO:0008202; GO:0008203; GO:0120009; GO:0030301; GO:0033344; GO:0015918; GO:0009615; GO:0032366	GO:0019899; GO:0015485; GO:0032934; GO:0120020	GO:0005615; GO:0005783; GO:0005576; GO:0005764	NPC2	67963	TRUE	0.14122	0.00190241	0.0514504	chr12
ENSMUSG00000020220	ENSMUST00000036579; ENSMUST00000130704; ENSMUST00000020441; ENSMUST00000185113; ENSMUST00000147511; ENSMUST00000141208; ENSMUST00000144835; ENSMUST00000142308; ENSMUST00000155670; ENSMUST00000132700	Vps13d	protein_coding	protein_coding	vacuolar protein sorting 13D [Source:MGI Symbol;Acc:MGI:2448530]	0.4814	6012	GO:0007005; GO:0006869; GO:1901526; GO:0006623; GO:0045053	GO:0003674	GO:0019898	VPS13D	230895	TRUE	-0.155427	0.00190439	0.0514504	chr4
ENSMUSG00000026565	ENSMUST00000111427; ENSMUST00000160260; ENSMUST00000159212; ENSMUST00000111429; ENSMUST00000184643; ENSMUST00000160908; ENSMUST00000111426; ENSMUST00000194366; ENSMUST00000184799; ENSMUST00000176004; ENSMUST00000027850; ENSMUST00000069609; ENSMUST00000176942; ENSMUST00000082225; ENSMUST00000177472; ENSMUST00000177358; ENSMUST00000176101; ENSMUST00000176800	Pou2f1	protein_coding	protein_coding	POU domain, class 2, transcription factor 1 [Source:MGI Symbol;Acc:MGI:101898]	0.5058	3004	GO:0006355; GO:0006357; GO:0045892; GO:0045944; GO:0010629; GO:0006366; GO:0060235; GO:0030910	GO:0003677; GO:0003700; GO:0000981; GO:0000978; GO:0000979; GO:0043565; GO:0005515; GO:0003682; GO:0000976; GO:0005102; GO:0042802	GO:0005634; GO:0005654; GO:0005783; GO:0043231; GO:0090575; GO:0005667	POU2F1	18986	TRUE	-0.230608	0.00191133	0.0515422	chr1
ENSMUSG00000022789	ENSMUST00000023477; ENSMUST00000096229; ENSMUST00000115749; ENSMUST00000230958; ENSMUST00000230022; ENSMUST00000230980; ENSMUST00000230038	Dnm1l	protein_coding	protein_coding	dynamin 1-like [Source:MGI Symbol;Acc:MGI:1921256]	0.4072	2940	GO:0007005; GO:0010468; GO:0012501; GO:0048511; GO:0006897; GO:0051259; GO:0043065; GO:2001244; GO:0065003; GO:0000266; GO:0016559; GO:0006816; GO:0050714; GO:0061003; GO:0010821; GO:0048488; GO:0051179; GO:0001836; GO:0090200; GO:0061025; GO:0070266; GO:0010637; GO:0043653; GO:0090141; GO:0090023; GO:1904666; GO:0048312; GO:1900244; GO:0070584; GO:0070585; GO:1903146; GO:0003374; GO:0036466; GO:…	GO:0005525; GO:0003924; GO:0005515; GO:0044877; GO:0016787; GO:0000166; GO:0008289; GO:0031267; GO:0042802; GO:0042803; GO:0008017; GO:0030742; GO:0031625; GO:0060090; GO:0030276; GO:0051433	GO:0005739; GO:0005829; GO:0005737; GO:0016020; GO:0005794; GO:0032991; GO:0048471; GO:0031410; GO:0043231; GO:0045202; GO:0005783; GO:0012505; GO:0005741; GO:0005777; GO:0030672; GO:0000139; GO:0005874; GO:0005905; GO:0099503; GO:0031966; GO:0005903; GO:0098835; GO:0099073; GO:0070161	DNM1L	74006	TRUE	-0.150451	0.00191751	0.0516133	chr16
ENSMUSG00000048279	ENSMUST00000089394; ENSMUST00000227570; ENSMUST00000119509; ENSMUST00000119943; ENSMUST00000121091; ENSMUST00000150222; ENSMUST00000229692	Sacs	protein_coding	protein_coding	sacsin [Source:MGI Symbol;Acc:MGI:1354724]	0.4641	5009	GO:0090084	GO:0030544; GO:0042802; GO:0051087; GO:0070628	GO:0005634; GO:0005737; GO:0005739	SACS	50720	TRUE	-0.29092	0.00192961	0.0518051	chr14
ENSMUSG00000025128	ENSMUST00000026120	Bhlhe22	protein_coding	protein_coding	basic helix-loop-helix family, member e22 [Source:MGI Symbol;Acc:MGI:1930001]	0.5167	3344	GO:0006355; GO:0006357; GO:0022008	GO:0046983; GO:0000981; GO:1990837	GO:0005634	BHLHE22	59058	TRUE	-0.470881	0.00193718	0.0518051	chr3
ENSMUSG00000008763	ENSMUST00000008907; ENSMUST00000133642; ENSMUST00000130066; ENSMUST00000196250; ENSMUST00000123442; ENSMUST00000146818	Man1a2	protein_coding	protein_coding	mannosidase, alpha, class 1A, member 2 [Source:MGI Symbol;Acc:MGI:104676]	0.5103	1818	GO:0006486; GO:0008152; GO:0005975; GO:0006491; GO:0048286; GO:0009100; GO:0007585	GO:0005509; GO:0004571; GO:0046872; GO:0016787; GO:0016798	GO:0016020; GO:0016021; GO:0000139; GO:0005794; GO:0005783	MAN1A2	17156	TRUE	-0.223774	0.00193798	0.0518051	chr3
ENSMUSG00000032244	ENSMUST00000034775	Fem1b	protein_coding	protein_coding	fem 1 homolog b [Source:MGI Symbol;Acc:MGI:1335087]	0.4643	6785	GO:0016567; GO:0043161; GO:0006915; GO:0060743; GO:1902041; GO:0060442; GO:0002070; GO:2000001; GO:0140627; GO:0051438	GO:0005515; GO:1990756; GO:0005123	GO:0005634; GO:0005829; GO:0005737; GO:0005654; GO:0031462	FEM1B	14155	TRUE	-0.157712	0.00194168	0.0518051	chr9
ENSMUSG00000042662	ENSMUST00000123121; ENSMUST00000185197; ENSMUST00000037715; ENSMUST00000109811	Dusp15	protein_coding	protein_coding	dual specificity phosphatase-like 15 [Source:MGI Symbol;Acc:MGI:1934928]	0.5753	1999	GO:0006470; GO:0016311; GO:0000122; GO:0007165; GO:0070374; GO:0048713	GO:0016791; GO:0008138; GO:0016787; GO:0004721; GO:0004725; GO:0004722; GO:0017018	GO:0005829; GO:0016020; GO:0005886	DUSP15	252864	TRUE	0.274784	0.0019458	0.0518051	chr2
ENSMUSG00000022883	ENSMUST00000231580; ENSMUST00000232205; ENSMUST00000023600; ENSMUST00000231474; ENSMUST00000231265; ENSMUST00000232545; ENSMUST00000232264; ENSMUST00000231566; ENSMUST00000232432	Robo1	protein_coding	protein_coding	roundabout guidance receptor 1 [Source:MGI Symbol;Acc:MGI:1274781]	0.4822	3121	GO:0007411; GO:0016199; GO:0035385; GO:0002042; GO:0006919; GO:0007156; GO:0021836; GO:0030336; GO:0033600; GO:0035025; GO:0043406; GO:0050772; GO:0050925; GO:0070100; GO:1900748	GO:0008046; GO:0005515; GO:0030275; GO:0042802	GO:0005737; GO:0005886; GO:0009986	ROBO1	19876	TRUE	-0.196489	0.00194598	0.0518051	chr16
ENSMUSG00000022829	ENSMUST00000114787; ENSMUST00000114782; ENSMUST00000114781; ENSMUST00000114780; ENSMUST00000023526; ENSMUST00000149984; ENSMUST00000114775; ENSMUST00000151910; ENSMUST00000149790; ENSMUST00000123629	Stxbp5l	protein_coding	protein_coding	syntaxin binding protein 5-like [Source:MGI Symbol;Acc:MGI:2443815]	0.436	2591	GO:0050790; GO:0015031; GO:0042593; GO:0006887; GO:0046676; GO:0017157; GO:2000300; GO:0050708	GO:0005515; GO:0005096; GO:0019905; GO:0045159	GO:0005737; GO:0016020; GO:0005886; GO:0031201; GO:0031594; GO:0098992	STXBP5L	207227	TRUE	-0.413326	0.00196138	0.0521199	chr16
ENSMUSG00000034342	ENSMUST00000206720; ENSMUST00000206147; ENSMUST00000206163; ENSMUST00000037644; ENSMUST00000205968; ENSMUST00000206258; ENSMUST00000206125; ENSMUST00000205313; ENSMUST00000206540; ENSMUST00000206629; ENSMUST00000205755	Cbl	protein_coding	protein_coding	Casitas B-lineage lymphoma [Source:MGI Symbol;Acc:MGI:88279]	0.4839	2287	GO:0007166; GO:0043066; GO:0006511; GO:0016567; GO:0000209; GO:0007165; GO:0023051; GO:0006468; GO:0006513; GO:0051865; GO:0042059; GO:0014068; GO:0046677; GO:0032487; GO:1901215; GO:0048260; GO:0045453; GO:0006974; GO:0007175; GO:0008584; GO:0010332; GO:0014823; GO:0033574; GO:0036120; GO:0042594; GO:0043303; GO:0045471; GO:0070997; GO:0090650; GO:1990090; GO:2000583	GO:0005509; GO:0001784; GO:0005515; GO:0016740; GO:0046872; GO:0004842; GO:0046875; GO:0061630; GO:0019901; GO:1990782; GO:0017124; GO:0030971; GO:0036312; GO:0047690	GO:0005829; GO:0030424; GO:0005737; GO:0016020; GO:0005794; GO:0005886; GO:0048471; GO:0005925; GO:0042995; GO:0005929; GO:0030426; GO:0045121; GO:0016600	CBL	12402	TRUE	-0.199106	0.00197788	0.0524625	chr9
ENSMUSG00000047126	ENSMUST00000103186; ENSMUST00000060766; ENSMUST00000124385; ENSMUST00000134999; ENSMUST00000141152; ENSMUST00000133501	Cltc	protein_coding	protein_coding	clathrin, heavy polypeptide (Hc) [Source:MGI Symbol;Acc:MGI:2388633]	0.4277	2783	GO:0006886; GO:0016192; GO:0006914; GO:0007049; GO:0006898; GO:0051301; GO:0007030; GO:0000278; GO:0090307; GO:0042147; GO:0060236; GO:1903077; GO:0048488; GO:0048268; GO:0031623; GO:1900126; GO:0072583; GO:0033572; GO:0150093	GO:0005198; GO:0005515; GO:0032051; GO:0003725; GO:0042277; GO:0008022; GO:0031072; GO:0030506; GO:0050750; GO:0097718; GO:1990381; GO:0019901	GO:0030130; GO:0030132; GO:0005739; GO:0005737; GO:0016020; GO:0032991; GO:0031410; GO:0030659; GO:0005829; GO:0005856; GO:0042383; GO:0012505; GO:0005768; GO:0005819; GO:0042470; GO:0005905; GO:0005764; GO:0043209; GO:0072686; GO:0030315; GO:1990498; GO:0071439; GO:0098850; GO:0030136; GO:0030117; GO:0098684; GO:0098835; GO:0031523; GO:0030118; GO:0045334	CLTC	67300	TRUE	-0.151104	0.00199075	0.052633	chr11
ENSMUSG00000034472	ENSMUST00000139848; ENSMUST00000132133	Rasd2	protein_coding	protein_coding	RASD family, member 2 [Source:MGI Symbol;Acc:MGI:1922391]	0.5583	2054	GO:0051897; GO:0007626; GO:0007610; GO:0031397; GO:0007165; GO:0043949; GO:0033235; GO:0001963	GO:0005525; GO:0003924; GO:0000166; GO:0031681; GO:0043548; GO:0031624	GO:0045202; GO:0016020; GO:0005886	RASD2	75141	TRUE	-0.213128	0.00199154	0.052633	chr8
ENSMUSG00000013150	ENSMUST00000013294; ENSMUST00000155038; ENSMUST00000135959	Gfod2	protein_coding	protein_coding	glucose-fructose oxidoreductase domain containing 2 [Source:MGI Symbol;Acc:MGI:1917825]	0.5731	1950	GO:0030198	GO:0000166; GO:0016491	GO:0005576; GO:0031012	GFOD2	70575	TRUE	0.146878	0.00199799	0.0527079	chr8
ENSMUSG00000068523	ENSMUST00000090031; ENSMUST00000118280; ENSMUST00000119130	Gng5	protein_coding	protein_coding	guanine nucleotide binding protein (G protein), gamma 5 [Source:MGI Symbol;Acc:MGI:109164]	0.4765	1202	GO:0007186; GO:0007165; GO:2000179; GO:0072513	GO:0031681; GO:0030165	GO:0005739; GO:0016020; GO:0005886; GO:0005834; GO:0031680	GNG5	14707	TRUE	0.32537	0.002004	0.0527707	chr3
ENSMUSG00000025060	ENSMUST00000026043; ENSMUST00000051691; ENSMUST00000123816; ENSMUST00000130115; ENSMUST00000239141; ENSMUST00000147841	Slk	protein_coding	protein_coding	STE20-like kinase [Source:MGI Symbol;Acc:MGI:103241]	0.4384	2295	GO:0006468; GO:0071346; GO:0042981; GO:0016310; GO:0006915; GO:0046777; GO:0043065; GO:0030334; GO:0031122; GO:0051893	GO:0005515; GO:0005524; GO:0004672; GO:0004674; GO:0016740; GO:0000166; GO:0016301; GO:0042802; GO:0042803; GO:0106310; GO:0035173	GO:0005737; GO:0048471; GO:0031252	SLK	20874	TRUE	-0.128791	0.00201508	0.0529669	chr19
ENSMUSG00000033938	ENSMUST00000036996; ENSMUST00000127162	Ndufb7	protein_coding	protein_coding	NADH:ubiquinone oxidoreductase subunit B7 [Source:MGI Symbol;Acc:MGI:1914166]	0.5668	2529	GO:0032981; GO:0009060; GO:0042776	GO:0003674	GO:0005739; GO:0016020; GO:0005743; GO:0005758; GO:0070469; GO:0005747	NDUFB7	66916	TRUE	0.172299	0.00202377	0.0530045	chr8
ENSMUSG00000021109	ENSMUST00000110461; ENSMUST00000110464; ENSMUST00000021530; ENSMUST00000149740; ENSMUST00000157041	Hif1a	protein_coding	protein_coding	hypoxia inducible factor 1, alpha subunit [Source:MGI Symbol;Acc:MGI:106918]	0.4155	2409	GO:0006355; GO:0001666; GO:0043066; GO:0071456; GO:0010629; GO:0001892; GO:0010628; GO:0045944; GO:0008284; GO:0045766; GO:0061298; GO:0010468; GO:0006915; GO:0043524; GO:0000122; GO:0014850; GO:0051402; GO:1900017; GO:0001525; GO:0051216; GO:0098586; GO:0002067; GO:0042127; GO:0006357; GO:0048593; GO:0045893; GO:0042593; GO:0001678; GO:0008542; GO:0006089; GO:0007165; GO:0048514; GO:0006879; GO:…	GO:0005515; GO:0046983; GO:0003677; GO:0003700; GO:0046982; GO:0043565; GO:0044877; GO:0000978; GO:0000977; GO:0000981; GO:0001228; GO:0002039; GO:0019901; GO:0019904; GO:0061629; GO:0019899; GO:0031625; GO:0016922; GO:0001216; GO:0001223; GO:0070888; GO:0051879; GO:0042826; GO:0140537	GO:0005634; GO:0005737; GO:0016607; GO:0005829; GO:0016604; GO:0000785; GO:0005654; GO:0032991; GO:0031514; GO:0090575; GO:0005667; GO:1904115; GO:0000791	HIF1A	15251	TRUE	-0.159007	0.0020238	0.0530045	chr12
ENSMUSG00000035623	ENSMUST00000205536; ENSMUST00000156060; ENSMUST00000107153; ENSMUST00000127891; ENSMUST00000206866; ENSMUST00000123731; ENSMUST00000150288; ENSMUST00000135270	Rsf1	protein_coding	protein_coding	remodeling and spacing factor 1 [Source:MGI Symbol;Acc:MGI:2682305]	0.4356	3512	GO:0006325; GO:0006355; GO:0006354; GO:0045893; GO:0045944; GO:0006334; GO:0006338; GO:0006352; GO:0043392; GO:0045892; GO:0050434	GO:0042393; GO:0046872; GO:0003712; GO:0140751	GO:0005634; GO:0005654; GO:0043231; GO:0031213; GO:0000785	RSF1	233532	TRUE	-0.179803	0.00203145	0.0531095	chr7
ENSMUSG00000009076	ENSMUST00000009220; ENSMUST00000154341; ENSMUST00000141970	Zmat5	protein_coding	protein_coding	zinc finger, matrin type 5 [Source:MGI Symbol;Acc:MGI:1914428]	0.5712	664	GO:0008150; GO:0008380; GO:0006397	GO:0008270; GO:0046872; GO:0003674	GO:0005654; GO:0005634; GO:0005681; GO:0005689	ZMAT5	67178	TRUE	0.223835	0.00207119	0.0539979	chr11
ENSMUSG00000022788	ENSMUST00000161861; ENSMUST00000162671; ENSMUST00000069284; ENSMUST00000161188; ENSMUST00000172181; ENSMUST00000162045; ENSMUST00000162124; ENSMUST00000159542; ENSMUST00000159058; ENSMUST00000162414; ENSMUST00000162542; ENSMUST00000161624	Fgd4	protein_coding	protein_coding	FYVE, RhoGEF and PH domain containing 4 [Source:MGI Symbol;Acc:MGI:2183747]	0.4373	3036	GO:0007010; GO:0008360; GO:0046330; GO:0043507; GO:0046847; GO:0030032; GO:0030035; GO:0050790	GO:0005085; GO:0046872; GO:0003779; GO:0051015	GO:0005737; GO:0005856; GO:0042995; GO:0030175; GO:0030027	FGD4	224014	TRUE	-0.257359	0.00207285	0.0539979	chr16
ENSMUSG00000037487	ENSMUST00000228368; ENSMUST00000228029; ENSMUST00000110336; ENSMUST00000226369; ENSMUST00000226414; ENSMUST00000228804; ENSMUST00000226629; ENSMUST00000228333; ENSMUST00000228292; ENSMUST00000228174; ENSMUST00000226137; ENSMUST00000228504; ENSMUST00000228101; ENSMUST00000227143	Ubr5	protein_coding	protein_coding	ubiquitin protein ligase E3 component n-recognin 5 [Source:MGI Symbol;Acc:MGI:1918040]	0.4277	2324	GO:0016567; GO:0000209; GO:0006974; GO:0010628; GO:0042307; GO:0050847; GO:0070936; GO:0090263; GO:1901315; GO:2000780	GO:0008270; GO:0003723; GO:0004842; GO:0043130; GO:0046872; GO:0034450; GO:0061630	GO:0005634; GO:0005654; GO:0005829; GO:0032991; GO:0048471	UBR5	70790	TRUE	-0.133165	0.0020924	0.0544098	chr15
ENSMUSG00000021484	ENSMUST00000021940; ENSMUST00000224517; ENSMUST00000225066; ENSMUST00000225366	Lman2	protein_coding	protein_coding	lectin, mannose-binding 2 [Source:MGI Symbol;Acc:MGI:1914140]	0.5292	2270	GO:0015031; GO:0050766; GO:0006888; GO:0006890; GO:0007030; GO:0007029	GO:0046872; GO:0030246; GO:0005537; GO:0031072	GO:0016020; GO:0016021; GO:0000139; GO:0005794; GO:0005615; GO:0009986; GO:0005887; GO:0005789; GO:0005793; GO:0030134	LMAN2	66890	TRUE	0.165616	0.00210285	0.0545841	chr13
ENSMUSG00000031290	ENSMUST00000152838; ENSMUST00000136789; ENSMUST00000134265; ENSMUST00000112819; ENSMUST00000137665; ENSMUST00000151730	Lrch2	protein_coding	protein_coding	leucine-rich repeats and calponin homology (CH) domain containing 2 [Source:MGI Symbol;Acc:MGI:2147870]	0.3625	3426		GO:0005515; GO:0003674		LRCH2	210297	TRUE	-0.285012	0.00215659	0.0558795	chrX
ENSMUSG00000029787	ENSMUST00000205188; ENSMUST00000031805; ENSMUST00000177249; ENSMUST00000204193; ENSMUST00000176560	Avl9	protein_coding	protein_coding	AVL9 cell migration associated [Source:MGI Symbol;Acc:MGI:1926187]	0.4745	2296	GO:0016477	GO:0003674	GO:0016020; GO:0016021; GO:0005737; GO:0005768; GO:0055037	AVL9	78937	TRUE	-0.166906	0.00217496	0.056124	chr6
ENSMUSG00000034021	ENSMUST00000202170; ENSMUST00000016569; ENSMUST00000038900; ENSMUST00000133738; ENSMUST00000110486; ENSMUST00000154083; ENSMUST00000201920; ENSMUST00000132947	Pds5b	protein_coding	protein_coding	PDS5 cohesin associated factor B [Source:MGI Symbol;Acc:MGI:2140945]	0.4078	3670	GO:0008285; GO:0042127; GO:0002088; GO:0007049; GO:0051301; GO:0007064; GO:0006281; GO:0097402	GO:0003677; GO:0003674	GO:0005634; GO:0000785; GO:0005654	PDS5B	100710	TRUE	-0.272406	0.00217698	0.056124	chr5
ENSMUSG00000021234	ENSMUST00000065536; ENSMUST00000021659; ENSMUST00000133230; ENSMUST00000126752	Fam161b	protein_coding	protein_coding	family with sequence similarity 161, member B [Source:MGI Symbol;Acc:MGI:2443027]	0.5028	2562	GO:0044782	GO:0003674	GO:0015630; GO:0005881; GO:0005929	FAM161B	217705	TRUE	-0.227075	0.00217961	0.056124	chr12
ENSMUSG00000045731	ENSMUST00000059339; ENSMUST00000224594	Pnoc	protein_coding	protein_coding	prepronociceptin [Source:MGI Symbol;Acc:MGI:105308]	0.5178	1772	GO:0007218; GO:0007268; GO:0007600	GO:0001515; GO:0031628	GO:0045202; GO:0005886; GO:0043025; GO:0005576; GO:0030425; GO:0043679	PNOC	18155	TRUE	0.26619	0.00218231	0.056124	chr14
ENSMUSG00000000276	ENSMUST00000107894; ENSMUST00000000285; ENSMUST00000152772	Dgke	protein_coding	protein_coding	diacylglycerol kinase, epsilon [Source:MGI Symbol;Acc:MGI:1889276]	0.4758	5706	GO:0007205; GO:0016310; GO:0007165; GO:0006629; GO:0035556; GO:0046486; GO:0050804; GO:0006654; GO:0046339; GO:0046834; GO:0006661	GO:0004143; GO:0016301; GO:0016740; GO:0046872; GO:0000166; GO:0005524	GO:0005829; GO:0005737; GO:0005654; GO:0016020; GO:0016021; GO:0098978	DGKE	56077	TRUE	-0.166709	0.0021853	0.056124	chr11
ENSMUSG00000046402	ENSMUST00000052068	Rbp1	protein_coding	protein_coding	retinol binding protein 1, cellular [Source:MGI Symbol;Acc:MGI:97876]	0.523	2652	GO:0015908; GO:0042573; GO:0055088; GO:0042572; GO:0030852; GO:0006776; GO:0002138; GO:0032526; GO:0033189; GO:0080021	GO:0008289; GO:0005504; GO:0016918; GO:0019841; GO:0005501; GO:1904768	GO:0005829; GO:0005654; GO:0005737; GO:0005634; GO:0005811; GO:0044297	RBP1	19659	TRUE	0.503578	0.00220613	0.0565592	chr9
ENSMUSG00000020717	ENSMUST00000103069; ENSMUST00000080853; ENSMUST00000183610; ENSMUST00000106796; ENSMUST00000184424; ENSMUST00000068021; ENSMUST00000135481; ENSMUST00000124958	Pecam1	protein_coding	protein_coding	platelet/endothelial cell adhesion molecule 1 [Source:MGI Symbol;Acc:MGI:97537]	0.4984	2473	GO:0001525; GO:0007166; GO:0098609; GO:0007155; GO:0007156; GO:0006909; GO:0001934; GO:0098742; GO:0042060; GO:0050731; GO:0070830; GO:0007266; GO:0061028; GO:0030837; GO:0030335; GO:0001886; GO:0042531; GO:0034260; GO:0050904; GO:0043542; GO:0030334; GO:0002687; GO:0007159; GO:0002693; GO:0050732; GO:0035696; GO:0072672; GO:0090673; GO:0150107; GO:0072011	GO:0005515; GO:0004888; GO:0042803; GO:0019903	GO:0005737; GO:0016020; GO:0016021; GO:0005886; GO:0005615; GO:0009897; GO:0071944; GO:0032991; GO:0009986; GO:0005887; GO:0070161; GO:0045121; GO:0005911; GO:0044291; GO:0001726; GO:0030485	PECAM1	18613	TRUE	0.304864	0.00221494	0.0566397	chr11
ENSMUSG00000069020	ENSMUST00000149379; ENSMUST00000156944; ENSMUST00000091142; ENSMUST00000147325; ENSMUST00000130542; ENSMUST00000123021	Urm1	protein_coding	protein_coding	ubiquitin related modifier 1 [Source:MGI Symbol;Acc:MGI:1915455]	0.5391	1137	GO:0034227; GO:0008033; GO:0002098; GO:0032447	GO:0031386; GO:0097163	GO:0005737; GO:0005634; GO:0005829	URM1	68205	TRUE	0.160156	0.00222405	0.0566397	chr2
ENSMUSG00000040521	ENSMUST00000152054; ENSMUST00000040560; ENSMUST00000138556; ENSMUST00000140564; ENSMUST00000145476; ENSMUST00000120547; ENSMUST00000134917	Tsfm	protein_coding	protein_coding	Ts translation elongation factor, mitochondrial [Source:MGI Symbol;Acc:MGI:1913649]	0.5476	851	GO:0006414; GO:0006412; GO:0070129; GO:0070125	GO:0003746	GO:0005739; GO:0005654; GO:0110165; GO:0005759	TSFM	66399	TRUE	0.187932	0.00222645	0.0566397	chr10
ENSMUSG00000036437	ENSMUST00000212588; ENSMUST00000039303	Npy1r	protein_coding	protein_coding	neuropeptide Y receptor Y1 [Source:MGI Symbol;Acc:MGI:104963]	0.444	2886	GO:0007186; GO:0006006; GO:0008217; GO:0007626; GO:0007165; GO:0007218; GO:0051481; GO:0019233; GO:0040014; GO:0045907; GO:0003151; GO:0007631; GO:0046888; GO:0030432	GO:0004930; GO:0004983; GO:0042923; GO:0008188; GO:0001601; GO:0001602	GO:0016021; GO:0005829; GO:0030424; GO:0016020; GO:0005886; GO:0043005; GO:0008021	NPY1R	18166	TRUE	-0.366988	0.00222831	0.0566397	chr8
ENSMUSG00000056851	ENSMUST00000230129; ENSMUST00000077037; ENSMUST00000229102; ENSMUST00000229618; ENSMUST00000229275; ENSMUST00000231089; ENSMUST00000229802; ENSMUST00000229854; ENSMUST00000108838; ENSMUST00000229222; ENSMUST00000229918; ENSMUST00000078404; ENSMUST00000229958; ENSMUST00000229184; ENSMUST00000230728; ENSMUST00000230114; ENSMUST00000229746; ENSMUST00000230211; ENSMUST00000230539; ENSMUST00000229219;…	Pcbp2	protein_coding	protein_coding	poly(rC) binding protein 2 [Source:MGI Symbol;Acc:MGI:108202]	0.496	1105	GO:0045944; GO:0043161; GO:0051607; GO:0002376; GO:0010468; GO:0045087; GO:0075522; GO:0051252; GO:0050687; GO:0039694	GO:0003723; GO:0005515; GO:0003677; GO:0003676; GO:0003729; GO:0003697; GO:0019899; GO:0031625; GO:1990829	GO:0005634; GO:0014069; GO:0005829; GO:0005737; GO:0005654; GO:1990904	PCBP2	18521	TRUE	0.107722	0.00222872	0.0566397	chr15
ENSMUSG00000023992	ENSMUST00000024791; ENSMUST00000132340; ENSMUST00000113237; ENSMUST00000148545	Trem2	protein_coding	protein_coding	triggering receptor expressed on myeloid cells 2 [Source:MGI Symbol;Acc:MGI:1913150]	0.562	1864	GO:0010628; GO:0035176; GO:0042742; GO:0010468; GO:0050766; GO:0007613; GO:0050731; GO:0070374; GO:0030316; GO:0043066; GO:0050714; GO:0048678; GO:1903078; GO:0002931; GO:0019216; GO:0045088; GO:0032733; GO:0032720; GO:0060100; GO:1901224; GO:0045672; GO:1904141; GO:1904646; GO:0050850; GO:0002282; GO:0034241; GO:0043277; GO:1903980; GO:0001774; GO:0006911; GO:0150076; GO:0048143; GO:0097028; GO:…	GO:0005515; GO:0044877; GO:0038023; GO:0008289; GO:0004888; GO:0001540; GO:0005543; GO:0001786; GO:0097110; GO:0120146; GO:0034185; GO:0001530; GO:0030169; GO:0019209; GO:0071813; GO:0008035; GO:0034186; GO:0008429; GO:0034189; GO:1990782; GO:0042834; GO:0070891	GO:0016020; GO:0016021; GO:0005886; GO:0005576; GO:0044853; GO:0005887; GO:0031226	TREM2	83433	TRUE	0.254658	0.00223327	0.0566567	chr17
ENSMUSG00000021252	ENSMUST00000021676; ENSMUST00000131681; ENSMUST00000124311; ENSMUST00000148323; ENSMUST00000142331	Erg28	protein_coding	protein_coding	ergosterol biosynthesis 28 [Source:MGI Symbol;Acc:MGI:1915571]	0.4916	1180	GO:0006629; GO:0008202; GO:0006694; GO:0016126	GO:0042802; GO:0030674	GO:0016021; GO:0016020; GO:0005783; GO:0005789; GO:0030133	ERG28	58520	TRUE	0.168276	0.00224411	0.0568326	chr12
ENSMUSG00000047907	ENSMUST00000109159; ENSMUST00000109157; ENSMUST00000185239; ENSMUST00000123300; ENSMUST00000140699	Tshz2	protein_coding	protein_coding	teashirt zinc finger family member 2 [Source:MGI Symbol;Acc:MGI:2153084]	0.5113	3373	GO:0010468; GO:0006357	GO:0003677; GO:0046872; GO:0000981; GO:0005515	GO:0005634	TSHZ2	228911	TRUE	-0.191847	0.00225746	0.0570714	chr2
ENSMUSG00000051238	ENSMUST00000053583	Swsap1	protein_coding	protein_coding	SWIM type zinc finger 7 associated protein 1 [Source:MGI Symbol;Acc:MGI:1914212]	0.5348	1838	GO:0006281; GO:0006974; GO:0006310; GO:0050821; GO:0000724	GO:0003677; GO:0003697; GO:0016887	GO:0005634; GO:0097196	SWSAP1	66962	TRUE	0.206073	0.00226913	0.0572003	chr9
ENSMUSG00000027312	ENSMUST00000028781; ENSMUST00000134964; ENSMUST00000156982; ENSMUST00000132557; ENSMUST00000151364	Atrn	protein_coding	protein_coding	attractin [Source:MGI Symbol;Acc:MGI:1341628]	0.4669	3744	GO:0042552; GO:0006954; GO:0016477; GO:0043473; GO:0009887; GO:0009888; GO:0021549; GO:0040014; GO:0006979; GO:0034446	GO:0005515; GO:0038023; GO:0030246	GO:0005737; GO:0016020; GO:0016021; GO:0005886; GO:0005615; GO:0005604	ATRN	11990	TRUE	-0.13072	0.0022766	0.0572003	chr2
ENSMUSG00000044030	ENSMUST00000053713	Irf2bp1	protein_coding	protein_coding	interferon regulatory factor 2 binding protein 1 [Source:MGI Symbol;Acc:MGI:2442159]	0.6361	2734	GO:0000122; GO:0006357; GO:0000209	GO:0046872; GO:0016740; GO:0003714; GO:0061630	GO:0005634; GO:0005654	IRF2BP1	272359	TRUE	0.14045	0.00228368	0.0572003	chr7
ENSMUSG00000038668	ENSMUST00000107570; ENSMUST00000107571; ENSMUST00000055018; ENSMUST00000107575; ENSMUST00000107574; ENSMUST00000155170; ENSMUST00000147354; ENSMUST00000145361	Lpar1	protein_coding	protein_coding	lysophosphatidic acid receptor 1 [Source:MGI Symbol;Acc:MGI:108429]	0.4897	2308	GO:0007186; GO:0010977; GO:0043951; GO:0007165; GO:0008360; GO:0043410; GO:0007189; GO:0007193; GO:0010942; GO:0043065; GO:0060999; GO:0051496; GO:0022008; GO:0051482; GO:0035025; GO:0019222; GO:0007202; GO:0060326; GO:0032060; GO:0071673; GO:1904566; GO:0007420; GO:0014003; GO:0021549; GO:0021554; GO:0022038; GO:0042552; GO:0043123; GO:0071453	GO:0004930; GO:0005515; GO:0030165; GO:0070915; GO:0005543; GO:0035727; GO:0001965	GO:0016021; GO:0005737; GO:0016020; GO:0005886; GO:0009986; GO:0043005; GO:0043025; GO:0043198; GO:0005768; GO:0005887; GO:0030139; GO:0043197	LPAR1	14745	TRUE	0.278523	0.00228582	0.0572003	chr4
ENSMUSG00000026721	ENSMUST00000028052; ENSMUST00000192019; ENSMUST00000191909; ENSMUST00000193185; ENSMUST00000194824; ENSMUST00000194623; ENSMUST00000235109; ENSMUST00000193729; ENSMUST00000191941; ENSMUST00000191651; ENSMUST00000028049; ENSMUST00000193115; ENSMUST00000192281; ENSMUST00000195114; ENSMUST00000194696; ENSMUST00000195442; ENSMUST00000193810	Rabgap1l	protein_coding	protein_coding	RAB GTPase activating protein 1-like [Source:MGI Symbol;Acc:MGI:1352507]	0.4282	1785	GO:0015031; GO:0090630; GO:0006897; GO:0032880; GO:0035855	GO:0005096; GO:0031267	GO:0005634; GO:0005794; GO:0005768; GO:0005769	RABGAP1L	29809	TRUE	-0.206877	0.00228792	0.0572003	chr1
ENSMUSG00000040022	ENSMUST00000171986; ENSMUST00000051996; ENSMUST00000170819	Rab11fip2	protein_coding	protein_coding	RAB11 family interacting protein 2 (class I) [Source:MGI Symbol;Acc:MGI:1922248]	0.4288	3795	GO:0015031; GO:0006909; GO:0043547; GO:0030010; GO:1903078; GO:0035669; GO:0035773; GO:0045055	GO:0031267; GO:0042802; GO:0042803; GO:0019901	GO:0016020; GO:0005654; GO:0005886; GO:0043231; GO:0005768; GO:0055038; GO:0001891	RAB11FIP2	74998	TRUE	-0.161466	0.0022888	0.0572003	chr19
ENSMUSG00000029528	ENSMUST00000067268; ENSMUST00000152156; ENSMUST00000086523; ENSMUST00000212819; ENSMUST00000129897; ENSMUST00000125007; ENSMUST00000137716; ENSMUST00000157050; ENSMUST00000153682; ENSMUST00000202564; ENSMUST00000134198; ENSMUST00000125054; ENSMUST00000139834; ENSMUST00000138139	Pxn	protein_coding	protein_coding	paxillin [Source:MGI Symbol;Acc:MGI:108295]	0.5951	1920	GO:0007179; GO:0006354; GO:0007155; GO:0007160; GO:0034446; GO:0043410; GO:0045860; GO:0007010; GO:0008360; GO:0051496; GO:0007229; GO:0043542; GO:0048754; GO:0045766; GO:0018108; GO:0060396; GO:0048041; GO:0030032; GO:1901652	GO:0005515; GO:0044877; GO:0046872; GO:0003712; GO:0005178; GO:0019901; GO:0017166; GO:0019903; GO:0008013; GO:0030159; GO:0005078; GO:0038191; GO:0051435	GO:0005829; GO:0005737; GO:0005886; GO:0070161; GO:0005925; GO:0005856; GO:0005911; GO:0030027; GO:0005938; GO:0031252; GO:0001725	PXN	19303	TRUE	0.191959	0.00229006	0.0572003	chr5
ENSMUSG00000004113	ENSMUST00000070864; ENSMUST00000102939; ENSMUST00000100348; ENSMUST00000131861; ENSMUST00000041342; ENSMUST00000114447; ENSMUST00000133892; ENSMUST00000125798; ENSMUST00000155356; ENSMUST00000124183	Cacna1b	protein_coding	protein_coding	calcium channel, voltage-dependent, N type, alpha 1B subunit [Source:MGI Symbol;Acc:MGI:88296]	0.5509	4334	GO:0055085; GO:0006811; GO:0034765; GO:0003008; GO:0006816; GO:0070588; GO:0065008; GO:0050804; GO:1904645; GO:0008217; GO:0007626; GO:0051649; GO:0007268; GO:0008016; GO:0014070; GO:0019233; GO:0098703; GO:0007269; GO:0070509; GO:0051924; GO:0033574; GO:0001956; GO:0048265; GO:0099533; GO:0099703	GO:0005509; GO:0005216; GO:0046872; GO:0005244; GO:0005245; GO:0005262; GO:0005261; GO:0008022; GO:0008331; GO:0005515; GO:0000166; GO:0005524; GO:0051721; GO:0099635	GO:0016020; GO:0016021; GO:0005886; GO:0032991; GO:0005891; GO:0043025; GO:0043005; GO:0043198; GO:0030425; GO:0098978; GO:0043679; GO:0098685	CACNA1B	12287	TRUE	-0.217345	0.00230101	0.0573614	chr2
ENSMUSG00000057335	ENSMUST00000057037; ENSMUST00000192664; ENSMUST00000195717; ENSMUST00000194727; ENSMUST00000194489; ENSMUST00000192927; ENSMUST00000195433; ENSMUST00000192991; ENSMUST00000194984; ENSMUST00000193765; ENSMUST00000193098; ENSMUST00000194371; ENSMUST00000192961; ENSMUST00000192643; ENSMUST00000194263	Cep170	protein_coding	protein_coding	centrosomal protein 170 [Source:MGI Symbol;Acc:MGI:1918348]	0.4119	3539	GO:0008150	GO:0005515; GO:0003674	GO:0005829; GO:0005737; GO:0005815; GO:0005856; GO:0005874; GO:0005819; GO:0005814; GO:0005813; GO:0120103	CEP170	545389	TRUE	-0.188677	0.00230438	0.0573614	chr1
ENSMUSG00000022091	ENSMUST00000227653; ENSMUST00000022682; ENSMUST00000227259; ENSMUST00000227929	Sorbs3	protein_coding	protein_coding	sorbin and SH3 domain containing 3 [Source:MGI Symbol;Acc:MGI:700013]	0.573	2729	GO:0007155; GO:0007015; GO:0000122; GO:0043410; GO:0000165; GO:0051496; GO:0031589	GO:0005515; GO:0017166	GO:0005634; GO:0005737; GO:0070161; GO:0005925; GO:0005856; GO:0030055	SORBS3	20410	TRUE	0.169846	0.0023333	0.057847	chr14
ENSMUSG00000025326	ENSMUST00000202945; ENSMUST00000107537; ENSMUST00000201794; ENSMUST00000202440; ENSMUST00000200758; ENSMUST00000202207; ENSMUST00000200781; ENSMUST00000201480; ENSMUST00000201409; ENSMUST00000207686; ENSMUST00000208313; ENSMUST00000200709; ENSMUST00000200949; ENSMUST00000202776; ENSMUST00000202247; ENSMUST00000202288; ENSMUST00000201162; ENSMUST00000202685	Ube3a	protein_coding	protein_coding	ubiquitin protein ligase E3A [Source:MGI Symbol;Acc:MGI:105098]	0.4123	2172	GO:0045944; GO:0006511; GO:0016567; GO:0000209; GO:0070936; GO:0048511; GO:0001541; GO:0051865; GO:0014068; GO:0030521; GO:0031398; GO:0060736; GO:0032570; GO:0035037; GO:0035641; GO:0042752; GO:0050847; GO:0061002; GO:0061743; GO:1905528; GO:2000058; GO:0042220; GO:0042542; GO:1990416	GO:0004842; GO:0005515; GO:0016740; GO:0046872; GO:0061630; GO:0003713	GO:0005634; GO:0005829; GO:0005737; GO:0000502	UBE3A	22215	TRUE	-0.229938	0.00233873	0.057847	chr7
ENSMUSG00000024382	ENSMUST00000025241; ENSMUST00000142213; ENSMUST00000129023	Ercc3	protein_coding	protein_coding	excision repair cross-complementing rodent repair deficiency, complementation group 3 [Source:MGI Symbol;Acc:MGI:95414]	0.5064	2061	GO:0006915; GO:0006366; GO:0006281; GO:0006974; GO:0006367; GO:0006289; GO:0008104; GO:0043065; GO:1901990; GO:0006979; GO:0006283; GO:0006362; GO:0009411; GO:0009650; GO:0033683; GO:0035315; GO:0048568; GO:0006265; GO:0000717; GO:0001666	GO:0003677; GO:0005524; GO:0016787; GO:0000166; GO:0004386; GO:0016887; GO:0003678; GO:0008022; GO:0043138; GO:0047485; GO:1990841	GO:0005634; GO:0005654; GO:0005669; GO:0000439; GO:0005675; GO:0000112; GO:0097550	ERCC3	13872	TRUE	-0.140097	0.00234077	0.057847	chr18
ENSMUSG00000038733	ENSMUST00000162819; ENSMUST00000237749; ENSMUST00000162963; ENSMUST00000036329; ENSMUST00000159673; ENSMUST00000159290; ENSMUST00000159698; ENSMUST00000159625; ENSMUST00000161531	Wdr26	protein_coding	protein_coding	WD repeat domain 26 [Source:MGI Symbol;Acc:MGI:1923825]	0.4403	2932	GO:0043161	GO:0005515; GO:0003674	GO:0005739; GO:0005634; GO:0005829; GO:0005737; GO:0005654; GO:0000151; GO:0034657	WDR26	226757	TRUE	-0.130387	0.0023429	0.057847	chr1
ENSMUSG00000053706	ENSMUST00000066298	B430305J03Rik	protein_coding	protein_coding	RIKEN cDNA B430305J03 gene [Source:MGI Symbol;Acc:MGI:3697707]	0.57	3702	GO:0008150	GO:0003674	GO:0005575		100532729	TRUE	-0.53861	0.00234537	0.057847	chr3
ENSMUSG00000028582	ENSMUST00000030320; ENSMUST00000139962; ENSMUST00000134844; ENSMUST00000150199; ENSMUST00000176846; ENSMUST00000106665; ENSMUST00000126156; ENSMUST00000176877; ENSMUST00000143336	Cc2d1b	protein_coding	protein_coding	coiled-coil and C2 domain containing 1B [Source:MGI Symbol;Acc:MGI:2443076]	0.552	1404	GO:0000122; GO:0006357	GO:0000978; GO:0000981; GO:0001227	GO:0005634; GO:0005654; GO:0043231	CC2D1B	319965	TRUE	0.242555	0.00234772	0.057847	chr4
ENSMUSG00000058881	ENSMUST00000235793; ENSMUST00000171238; ENSMUST00000236858; ENSMUST00000235902; ENSMUST00000071233; ENSMUST00000237340; ENSMUST00000236468	Zfp516	protein_coding	protein_coding	zinc finger protein 516 [Source:MGI Symbol;Acc:MGI:2443957]	0.5853	2609	GO:0006357; GO:0006355; GO:0045893; GO:0050873; GO:0120162; GO:0060612; GO:0009409	GO:0003677; GO:0046872; GO:0000978; GO:0000981; GO:0005515; GO:0140297; GO:0000987	GO:0005634	ZNF516	329003	TRUE	0.173251	0.00235443	0.0579141	chr18
ENSMUSG00000041881	ENSMUST00000048249; ENSMUST00000173182; ENSMUST00000173132; ENSMUST00000234470; ENSMUST00000174498; ENSMUST00000173807; ENSMUST00000173175; ENSMUST00000174847; ENSMUST00000173556; ENSMUST00000173946	Ndufa7	protein_coding	protein_coding	NADH:ubiquinone oxidoreductase subunit A7 [Source:MGI Symbol;Acc:MGI:1913666]	0.5336	467	GO:0042773; GO:0032543; GO:0009060; GO:0042776; GO:0006120	GO:0003735	GO:0005743; GO:0005739; GO:0016020; GO:0070469; GO:0005747; GO:0005761	NDUFA7	66416	TRUE	0.174584	0.00236428	0.0580585	chr17
ENSMUSG00000022752	ENSMUST00000166897; ENSMUST00000231298; ENSMUST00000231901	Tomm70a	protein_coding	protein_coding	translocase of outer mitochondrial membrane 70A [Source:MGI Symbol;Acc:MGI:106295]	0.3921	3521	GO:0042981; GO:0098586; GO:0032728; GO:0002218; GO:1904591; GO:0002230; GO:0061052; GO:0006626; GO:0030150; GO:0045039; GO:0097068	GO:0005515; GO:0008320; GO:0030943	GO:0005739; GO:0016020; GO:0016021; GO:0005741; GO:0005742; GO:0031307	TOMM70	28185	TRUE	-0.163552	0.00238468	0.0582751	chr16
ENSMUSG00000032387	ENSMUST00000169003; ENSMUST00000055844; ENSMUST00000213927; ENSMUST00000216342; ENSMUST00000216382; ENSMUST00000216769	Rbpms2	protein_coding	protein_coding	RNA binding protein with multiple splicing 2 [Source:MGI Symbol;Acc:MGI:1919223]	0.5734	1021	GO:0030514; GO:0048557; GO:0048661; GO:0051151	GO:0003723; GO:0003676; GO:0042803; GO:0003729; GO:0042802	GO:0005737	RBPMS2	71973	TRUE	0.435271	0.00239039	0.0582751	chr9
ENSMUSG00000051401	ENSMUST00000096572; ENSMUST00000236889; ENSMUST00000091927; ENSMUST00000235241; ENSMUST00000236301; ENSMUST00000238039; ENSMUST00000237456; ENSMUST00000237764; ENSMUST00000237805; ENSMUST00000236525	Kctd16	protein_coding	protein_coding	potassium channel tetramerisation domain containing 16 [Source:MGI Symbol;Acc:MGI:1914659]	0.4936	974	GO:0051260; GO:0008277	GO:0003674	GO:0016020; GO:0016021; GO:0005886; GO:0045202; GO:0045211; GO:0042995; GO:0043235; GO:0042734	KCTD16	383348	TRUE	-0.343179	0.00239185	0.0582751	chr18
ENSMUSG00000036568	ENSMUST00000040624; ENSMUST00000233537; ENSMUST00000233142; ENSMUST00000233455	Bicral	protein_coding	protein_coding	BRD4 interacting chromatin remodeling complex associated protein like [Source:MGI Symbol;Acc:MGI:2673855]	0.518	2842	GO:0045893; GO:0006338; GO:0006357; GO:1902459; GO:0008284; GO:0045596		GO:0016514; GO:0000785; GO:0140288	BICRAL	210982	TRUE	-0.135015	0.00239427	0.0582751	chr17
ENSMUSG00000047141	ENSMUST00000207826; ENSMUST00000052588	Zfp654	protein_coding	protein_coding	zinc finger protein 654 [Source:MGI Symbol;Acc:MGI:1919270]	0.3567	5501	GO:0006357	GO:0003677; GO:0046872; GO:0000981	GO:0005634	ZNF654	72020	TRUE	-0.225863	0.00239936	0.0582751	chr16
ENSMUSG00000019947	ENSMUST00000219238; ENSMUST00000020106; ENSMUST00000218532; ENSMUST00000218425	Arid5b	protein_coding	protein_coding	AT rich interactive domain 5B (MRF1-like) [Source:MGI Symbol;Acc:MGI:2175912]	0.4874	4438	GO:1990830; GO:0009791; GO:0035264; GO:0000122; GO:0048008; GO:0006357; GO:0010761; GO:0045893; GO:0001822; GO:0006807; GO:0048705; GO:0060021; GO:0060325; GO:0051091; GO:0060612; GO:0045444; GO:0048468; GO:0008584; GO:0008585; GO:0030325; GO:0048644; GO:0060613	GO:0003677; GO:0000976; GO:0003713	GO:0005634	ARID5B	71371	TRUE	-0.300259	0.00240176	0.0582751	chr10
ENSMUSG00000005362	ENSMUST00000013882; ENSMUST00000113239; ENSMUST00000151484; ENSMUST00000147087; ENSMUST00000204230	Crbn	protein_coding	protein_coding	cereblon [Source:MGI Symbol;Acc:MGI:1913277]	0.4217	2131	GO:0016567; GO:0043161; GO:0031333; GO:0031334; GO:0030177; GO:0034766; GO:0035641; GO:1902607	GO:0046872; GO:0044325	GO:0005634; GO:0005737; GO:0016020; GO:0048471; GO:0031464	CRBN	58799	TRUE	-0.154124	0.00240206	0.0582751	chr6
ENSMUSG00000036634	ENSMUST00000187137; ENSMUST00000040548; ENSMUST00000191081; ENSMUST00000188569; ENSMUST00000186422; ENSMUST00000190638; ENSMUST00000190950; ENSMUST00000191486	Mag	protein_coding	protein_coding	myelin-associated glycoprotein [Source:MGI Symbol;Acc:MGI:96912]	0.5568	1555	GO:0042552; GO:0010977; GO:0007155; GO:0045665; GO:0031103; GO:0030517; GO:0043524; GO:0019226; GO:0048711; GO:0032289; GO:0022010; GO:0031643; GO:0098742; GO:0007399; GO:0071260	GO:0005515; GO:0008289; GO:0005102; GO:0030246; GO:0033691; GO:0019901; GO:0042803; GO:1905576	GO:0005737; GO:0016020; GO:0016021; GO:0005886; GO:0045121; GO:0005887; GO:0033270; GO:0043209; GO:0043220; GO:0043218; GO:0097453; GO:0035749	MAG	17136	TRUE	0.233503	0.00240512	0.0582751	chr7
ENSMUSG00000022812	ENSMUST00000023507; ENSMUST00000114750; ENSMUST00000134870; ENSMUST00000132057; ENSMUST00000231437	Gsk3b	protein_coding	protein_coding	glycogen synthase kinase 3 beta [Source:MGI Symbol;Acc:MGI:1861437]	0.4419	2722	GO:0006468; GO:0043066; GO:0071260; GO:0010629; GO:0016055; GO:0010628; GO:0045944; GO:0060070; GO:2000738; GO:0048675; GO:0045667; GO:0048863; GO:0071300; GO:0016477; GO:0014043; GO:2000740; GO:0006366; GO:0001837; GO:0010977; GO:0016310; GO:0007399; GO:0051128; GO:0009968; GO:0043525; GO:0007163; GO:0030154; GO:0005975; GO:0007010; GO:0035556; GO:0005977; GO:0048511; GO:0007165; GO:0007623; GO:…	GO:0005524; GO:0004672; GO:0005515; GO:0016740; GO:0000166; GO:0016301; GO:0004674; GO:0050321; GO:0002020; GO:0106310; GO:0002039; GO:0005178; GO:0019901; GO:0061629; GO:0034452; GO:0031625; GO:0008013; GO:0051059; GO:0035255; GO:0034236; GO:0048156; GO:0070840	GO:0005739; GO:0005634; GO:1990904; GO:0014069; GO:0005829; GO:0005737; GO:0030424; GO:0005654; GO:0016020; GO:0005886; GO:0032991; GO:0030426; GO:0043025; GO:0043198; GO:0030425; GO:0098978; GO:0005813; GO:0043197; GO:0045121; GO:0005874; GO:0048471; GO:0030877; GO:1990909; GO:0098685; GO:0043227; GO:0016021	GSK3B	56637	TRUE	-0.135695	0.00242429	0.058576	chr16
ENSMUSG00000025429	ENSMUST00000238172; ENSMUST00000114741	Pstpip2	protein_coding	protein_coding	proline-serine-threonine phosphatase-interacting protein 2 [Source:MGI Symbol;Acc:MGI:1335088]	0.4862	1662	GO:0016477; GO:0007010; GO:0030041	GO:0003779; GO:0005515; GO:0051015	GO:0005737; GO:0016020; GO:0005886; GO:0005829; GO:0005856; GO:0005884	PSTPIP2	19201	TRUE	-0.336281	0.00242558	0.058576	chr18
ENSMUSG00000043881	ENSMUST00000061222	Kbtbd7	protein_coding	protein_coding	kelch repeat and BTB (POZ) domain containing 7 [Source:MGI Symbol;Acc:MGI:2685141]	0.4306	4526	GO:0043161; GO:0070936; GO:0035020	GO:0005515	GO:0031463	KBTBD7	211255	TRUE	-0.192157	0.00243781	0.0586237	chr14
ENSMUSG00000075602	ENSMUST00000189068; ENSMUST00000023248; ENSMUST00000187994; ENSMUST00000186526; ENSMUST00000187171; ENSMUST00000190188	Ly6a	protein_coding	protein_coding	lymphocyte antigen 6 complex, locus A [Source:MGI Symbol;Acc:MGI:107527]	0.4916	783	GO:0009617; GO:0095500; GO:2000272	GO:0005515; GO:0030550; GO:0033130	GO:0045202; GO:0016020; GO:0005886; GO:0009897; GO:0031225		110454	TRUE	0.368818	0.00245114	0.0586237	chr15
ENSMUSG00000022472	ENSMUST00000146628; ENSMUST00000152227; ENSMUST00000135988; ENSMUST00000129039; ENSMUST00000023110; ENSMUST00000089187	Desi1	protein_coding	protein_coding	desumoylating isopeptidase 1 [Source:MGI Symbol;Acc:MGI:106313]	0.5353	1632	GO:0006508; GO:0006611; GO:0032434; GO:0016926; GO:0070646	GO:0008233; GO:0016787; GO:0005515; GO:0042802; GO:0061676; GO:0016929	GO:0005829; GO:0005634; GO:0005737; GO:0032991	DESI1	28075	TRUE	0.197599	0.00245159	0.0586237	chr15
ENSMUSG00000033307	ENSMUST00000038169; ENSMUST00000218267	Mif	protein_coding	protein_coding	macrophage migration inhibitory factor (glycosylation-inhibiting factor) [Source:MGI Symbol;Acc:MGI:96982]	0.6162	572	GO:0090398; GO:0043066; GO:0010629; GO:0048146; GO:0008284; GO:0042127; GO:0002376; GO:0006954; GO:0045087; GO:0030890; GO:0032760; GO:0050918; GO:1902166; GO:2000773; GO:0050731; GO:0070374; GO:0033138; GO:0030336; GO:0001819; GO:0007166; GO:0010739; GO:0042327; GO:0001516; GO:0070207; GO:0001934; GO:0030330; GO:0002821; GO:0002906; GO:0043518; GO:2000343; GO:0010760; GO:0031666; GO:0019752; GO:…	GO:0044877; GO:0016853; GO:0005125; GO:0042802; GO:0042056; GO:0002020; GO:0005126; GO:0050178; GO:0004167	GO:0005634; GO:0005829; GO:0005737; GO:0005654; GO:0005886; GO:0005615; GO:0009986; GO:0005576; GO:0043209	MIF	17319	TRUE	0.152138	0.0024546	0.0586237	chr10
ENSMUSG00000031870	ENSMUST00000189181; ENSMUST00000151080; ENSMUST00000070463; ENSMUST00000098986	Pgr	protein_coding	protein_coding	progesterone receptor [Source:MGI Symbol;Acc:MGI:97567]	0.5227	4230	GO:0006355; GO:0043401; GO:0043066; GO:0045944; GO:0008284; GO:0030879; GO:0006357; GO:0045893; GO:0042220; GO:0048286; GO:0014911; GO:0030518; GO:0050847; GO:0002071; GO:0050678; GO:0038001; GO:0001542; GO:0060748; GO:0002070; GO:0010629; GO:0060180; GO:1904709	GO:0008270; GO:0003677; GO:0003707; GO:0005496; GO:0003700; GO:0043565; GO:0000978; GO:0046872; GO:0005515; GO:0008289; GO:0005102; GO:0001228; GO:0042802; GO:0004879; GO:0051117; GO:0019899; GO:0042562; GO:0001223; GO:0003676	GO:0005634; GO:0005739; GO:0005829; GO:0005737; GO:0030424; GO:0005886; GO:0005783; GO:0043005; GO:0030425; GO:0043679; GO:0043204; GO:0043197	PGR	18667	TRUE	-0.287654	0.00245507	0.0586237	chr9
ENSMUSG00000061904	ENSMUST00000076694; ENSMUST00000163246; ENSMUST00000170810; ENSMUST00000164505; ENSMUST00000167455; ENSMUST00000169339; ENSMUST00000171960; ENSMUST00000172442	Slc25a3	protein_coding	protein_coding	solute carrier family 25 (mitochondrial carrier, phosphate carrier), member 3 [Source:MGI Symbol;Acc:MGI:1353498]	0.4754	1494	GO:0035435; GO:1990547	GO:0044877; GO:0015293; GO:0005315	GO:0005739; GO:0016020; GO:0016021; GO:0005743; GO:0043209; GO:0031305	SLC25A3	18674	TRUE	0.119462	0.00245573	0.0586237	chr10
ENSMUSG00000026185	ENSMUST00000027377; ENSMUST00000137339	Igfbp5	protein_coding	protein_coding	insulin-like growth factor binding protein 5 [Source:MGI Symbol;Acc:MGI:96440]	0.5034	5144	GO:0045668; GO:0017148; GO:0051897; GO:0071320; GO:0051146; GO:0042593; GO:0001558; GO:0030336; GO:1904754; GO:0071407; GO:0040008; GO:0048662; GO:1904707; GO:0060056; GO:0031069; GO:0048286; GO:0044342; GO:0014912; GO:0001649; GO:0043568; GO:0048009; GO:0043569; GO:0060416; GO:0043567; GO:0007565; GO:0007568; GO:0014070; GO:0035556; GO:0045926; GO:1901862; GO:1904205	GO:0019838; GO:0031994; GO:0005520; GO:0001968; GO:0031995	GO:0005576; GO:0005615; GO:0042567; GO:0016942	IGFBP5	16011	TRUE	-0.26861	0.00245574	0.0586237	chr1
ENSMUSG00000043313	ENSMUST00000059571	Pcdhb19	protein_coding	protein_coding	protocadherin beta 19 [Source:MGI Symbol;Acc:MGI:2136757]	0.4122	7138	GO:0007156; GO:0007155	GO:0005509	GO:0016020; GO:0005886; GO:0016021; GO:0005887	PCDHB11,PCDHB12,PCDHB18P	93890	TRUE	-0.355618	0.00247608	0.0590127	chr18
ENSMUSG00000022552	ENSMUST00000229536; ENSMUST00000230314; ENSMUST00000123112; ENSMUST00000023211; ENSMUST00000147001; ENSMUST00000154477; ENSMUST00000144816; ENSMUST00000159429; ENSMUST00000230016; ENSMUST00000160560; ENSMUST00000152151; ENSMUST00000137106; ENSMUST00000133993	Sharpin	protein_coding	protein_coding	SHANK-associated RH domain interacting protein [Source:MGI Symbol;Acc:MGI:1913331]	0.5558	1153	GO:0007005; GO:0042742; GO:0016567; GO:0043161; GO:0043123; GO:0008544; GO:0050728; GO:0031424; GO:0010803; GO:0030262; GO:2000348; GO:0007420; GO:0097039	GO:0044877; GO:0046872; GO:0005515; GO:0043130; GO:0042802; GO:0031593; GO:0004842	GO:0014069; GO:0005829; GO:0005737; GO:0045202; GO:0030425; GO:0000151; GO:0071797	SHARPIN	106025	TRUE	0.153489	0.00248311	0.0590298	chr15
ENSMUSG00000015806	ENSMUST00000198258; ENSMUST00000197946; ENSMUST00000117425; ENSMUST00000120867; ENSMUST00000118097; ENSMUST00000015950; ENSMUST00000200259; ENSMUST00000149290; ENSMUST00000154962; ENSMUST00000127562	Qdpr	protein_coding	protein_coding	quinoid dihydropteridine reductase [Source:MGI Symbol;Acc:MGI:97836]	0.5251	987	GO:0006729; GO:0006559	GO:0016491; GO:0042802; GO:0070402; GO:0070404; GO:0004155	GO:0005739; GO:0005829; GO:0005737; GO:0043005	QDPR	110391	TRUE	0.228519	0.00248533	0.0590298	chr5
ENSMUSG00000024944	ENSMUST00000134821; ENSMUST00000025893; ENSMUST00000236138; ENSMUST00000235200; ENSMUST00000123193	Arl2	protein_coding	protein_coding	ADP-ribosylation factor-like 2 [Source:MGI Symbol;Acc:MGI:1928393]	0.5589	1260	GO:0007049; GO:0051457; GO:0007098; GO:0006457; GO:0031113; GO:0006110; GO:0031116; GO:0034260; GO:1903715; GO:0010811; GO:0070830; GO:0015870	GO:0005525; GO:0003924; GO:0000166; GO:0005515; GO:0019003	GO:0005739; GO:0005634; GO:0005730; GO:0005829; GO:0005737; GO:0005654; GO:0005794; GO:0005815; GO:0016328; GO:0005925; GO:0005856; GO:0005758; GO:0005813; GO:0015630	ARL2	56327	TRUE	0.126999	0.00248897	0.0590298	chr19
ENSMUSG00000047036	ENSMUST00000214626; ENSMUST00000216063; ENSMUST00000056467; ENSMUST00000213971; ENSMUST00000216243; ENSMUST00000214162; ENSMUST00000216721; ENSMUST00000214558	Zfp445	protein_coding	protein_coding	zinc finger protein 445 [Source:MGI Symbol;Acc:MGI:2143340]	0.4722	1774	GO:0006355; GO:0006357; GO:0045944; GO:0010216; GO:2000653	GO:0003677; GO:0046872; GO:0000978; GO:0001228; GO:0003682; GO:0010385	GO:0005634	ZNF445	235682	TRUE	-0.212535	0.0025042	0.0592921	chr9
ENSMUSG00000024830	ENSMUST00000025749; ENSMUST00000127605; ENSMUST00000141104; ENSMUST00000130469; ENSMUST00000154307; ENSMUST00000135911; ENSMUST00000118483; ENSMUST00000137431; ENSMUST00000237691; ENSMUST00000155303; ENSMUST00000151727; ENSMUST00000125057	Rps6kb2	protein_coding	protein_coding	ribosomal protein S6 kinase, polypeptide 2 [Source:MGI Symbol;Acc:MGI:1927343]	0.5743	1420	GO:0006468; GO:0043491; GO:0016310; GO:0018105; GO:0045948; GO:0031929; GO:0007165	GO:0005524; GO:0004672; GO:0004674; GO:0016740; GO:0000166; GO:0016301; GO:0106310; GO:0042277; GO:0004711	GO:0005634; GO:0005737	RPS6KB2	58988	TRUE	0.344937	0.00250817	0.0592921	chr19
ENSMUSG00000030037	ENSMUST00000113938; ENSMUST00000129656	Mrpl53	protein_coding	protein_coding	mitochondrial ribosomal protein L53 [Source:MGI Symbol;Acc:MGI:1915749]	0.5388	702	GO:0032543	GO:0003674	GO:0005739; GO:0005762; GO:0005840; GO:1990904; GO:0005743	MRPL53	68499	TRUE	0.208072	0.0025134	0.0592987	chr6
ENSMUSG00000038121	ENSMUST00000042852; ENSMUST00000152193	Fam210a	protein_coding	protein_coding	family with sequence similarity 210, member A [Source:MGI Symbol;Acc:MGI:1914000]	0.4927	5150	GO:0008150	GO:0003674	GO:0005739; GO:0005737; GO:0016020; GO:0016021	FAM210A	108654	TRUE	-0.175187	0.00251659	0.0592987	chr18
ENSMUSG00000043716	ENSMUST00000140597; ENSMUST00000058437; ENSMUST00000141217; ENSMUST00000151017; ENSMUST00000149566; ENSMUST00000125005	Rpl7	protein_coding	protein_coding	ribosomal protein L7 [Source:MGI Symbol;Acc:MGI:98073]	0.4528	1005	GO:0006412; GO:0042273; GO:0000463; GO:0002181; GO:0006364	GO:0003735; GO:0003729; GO:0003723; GO:0003677; GO:0042802; GO:0008097	GO:1990904; GO:0014069; GO:0005737; GO:0005840; GO:0045202; GO:0005844; GO:0022625; GO:0005829; GO:0031672; GO:0022626	RPL7	19989	TRUE	0.120407	0.00252809	0.0594541	chr1
ENSMUSG00000078897	ENSMUST00000109046; ENSMUST00000109045; ENSMUST00000152941; ENSMUST00000153210	Gm4724	protein_coding	protein_coding	predicted gene 4724 [Source:MGI Symbol;Acc:MGI:3782904]	0.3917	1292	GO:0006355; GO:0006357; GO:0045944; GO:0008150	GO:0046872; GO:0000978; GO:0001228; GO:0003674	GO:0005575; GO:0005634	ZNF117,ZNF14,ZNF157,ZNF17,ZNF20,ZNF221,ZNF234,ZNF254,ZNF28,ZNF284,ZNF429,ZNF432,ZNF433,ZNF442,ZNF490,ZNF493,ZNF502,ZNF544,ZNF546,ZNF56P,ZNF595,ZNF611,ZNF615,ZNF676,ZNF678,ZNF681,ZNF696,ZNF700,ZNF708,ZNF716,ZNF724,ZNF726,ZNF728,ZNF732,ZNF778,ZNF799,ZNF813,ZNF85,ZNF860,ZNF878,ZNF93	100043915	TRUE	-0.451441	0.00253614	0.0594541	chr2
ENSMUSG00000053963	ENSMUST00000136521; ENSMUST00000211561; ENSMUST00000210737; ENSMUST00000210107; ENSMUST00000179826; ENSMUST00000211782	Stum	protein_coding	protein_coding	mechanosensory transduction mediator [Source:MGI Symbol;Acc:MGI:2138735]	0.5747	1818	GO:0008150	GO:0003674	GO:0005575; GO:0016020; GO:0016021	STUM	381310	TRUE	-0.327692	0.00253646	0.0594541	chr1
ENSMUSG00000043535	ENSMUST00000129544; ENSMUST00000061578; ENSMUST00000154910; ENSMUST00000135992; ENSMUST00000145422	Setx	protein_coding	protein_coding	senataxin [Source:MGI Symbol;Acc:MGI:2443480]	0.4506	2750	GO:0043066; GO:0045944; GO:0010976; GO:0043491; GO:0071300; GO:0007399; GO:0006281; GO:0006974; GO:0006353; GO:0007283; GO:0030154; GO:0048511; GO:0006310; GO:0006302; GO:0000165; GO:0034599; GO:0006369; GO:0006376; GO:0007623; GO:0008543; GO:0033120; GO:0044344; GO:0060566; GO:0070301; GO:2000144; GO:2000806	GO:0004386; GO:0005515; GO:0016787; GO:0000166; GO:0005524; GO:0003723; GO:0042802; GO:0001147	GO:0005634; GO:0005737; GO:0030424; GO:0016604; GO:0005654; GO:0045171; GO:0005694; GO:0030426; GO:0042995; GO:0005730; GO:0000781; GO:0000228	SETX	269254	TRUE	-0.197669	0.00254193	0.0594541	chr2
ENSMUSG00000061136	ENSMUST00000076313; ENSMUST00000210789; ENSMUST00000239398; ENSMUST00000133384; ENSMUST00000209364; ENSMUST00000211712; ENSMUST00000125243; ENSMUST00000211102; ENSMUST00000209508; ENSMUST00000152922; ENSMUST00000132031	Prpf40a	protein_coding	protein_coding	pre-mRNA processing factor 40A [Source:MGI Symbol;Acc:MGI:1860512]	0.4356	2573	GO:0045292; GO:0016477; GO:0008380; GO:0006397; GO:0008360; GO:0007010; GO:0000398; GO:0032465	GO:0005515; GO:0003723; GO:0070064	GO:0005634; GO:0016607; GO:0016363; GO:0071004; GO:0005685	PRPF40A	56194	TRUE	-0.170007	0.0025436	0.0594541	chr2
ENSMUSG00000041245	ENSMUST00000184730; ENSMUST00000184392; ENSMUST00000149140; ENSMUST00000096285; ENSMUST00000131844; ENSMUST00000133852	Wnk3	protein_coding	protein_coding	WNK lysine deficient protein kinase 3 [Source:MGI Symbol;Acc:MGI:2652875]	0.4186	5264	GO:0006468; GO:0043066; GO:0016310; GO:0035556; GO:0046777; GO:0010800; GO:0072659; GO:0050801; GO:0010765; GO:1903078; GO:0051928; GO:2000651; GO:0090279; GO:0006884; GO:1904062; GO:0018107; GO:0035633; GO:0010766; GO:1903288; GO:0032414; GO:0007231; GO:0090188	GO:0005524; GO:0004672; GO:0004674; GO:0016740; GO:0000166; GO:0016301; GO:0106310; GO:0019869; GO:0019870	GO:0005737; GO:0005829; GO:0005912; GO:0005923	WNK3	279561	TRUE	-0.229212	0.00258346	0.0601951	chrX
ENSMUSG00000067567	ENSMUST00000087916; ENSMUST00000154872; ENSMUST00000148481; ENSMUST00000137785; ENSMUST00000154024	Hdac8	protein_coding	protein_coding	histone deacetylase 8 [Source:MGI Symbol;Acc:MGI:1917565]	0.4627	1533	GO:1904322; GO:0045668; GO:0010629; GO:0035984; GO:0006357; GO:0006325; GO:0016575; GO:0031397; GO:0031647; GO:0007062; GO:0032204; GO:0071922; GO:2000616; GO:1903496	GO:0003682; GO:0046872; GO:0016787; GO:0004407; GO:0033558; GO:0160008; GO:0140297; GO:0019213; GO:0160009; GO:0030544; GO:0051879	GO:0005634; GO:0005737; GO:0005694; GO:0000118	HDAC8	70315	TRUE	0.228257	0.00258397	0.0601951	chrX
ENSMUSG00000033361	ENSMUST00000126362; ENSMUST00000170096; ENSMUST00000048790	Prrg3	protein_coding	protein_coding	proline rich Gla (G-carboxyglutamic acid) 3 (transmembrane) [Source:MGI Symbol;Acc:MGI:2685214]	0.5264	3228	GO:0008150	GO:0005509; GO:0003674	GO:0005576; GO:0016021; GO:0016020; GO:0005886	PRRG3	208748	TRUE	-0.200829	0.0025877	0.0601951	chrX
ENSMUSG00000061755	ENSMUST00000050556; ENSMUST00000202908; ENSMUST00000201291; ENSMUST00000202200	Bod1l	protein_coding	protein_coding	biorientation of chromosomes in cell division 1-like [Source:MGI Symbol;Acc:MGI:2444804]	0.4396	6248	GO:0031297; GO:0006281; GO:0006974; GO:0032515	GO:0003677; GO:0004864; GO:0051721	GO:0005654; GO:0005694; GO:0005813; GO:0000922; GO:0048188; GO:0005876; GO:0000940	BOD1L1	665775	TRUE	-0.221662	0.00259313	0.0602251	chr5
ENSMUSG00000034848	ENSMUST00000102718; ENSMUST00000125446; ENSMUST00000169968; ENSMUST00000131503	Ttc21b	protein_coding	protein_coding	tetratricopeptide repeat domain 21B [Source:MGI Symbol;Acc:MGI:1920918]	0.4388	3904	GO:0010628; GO:0006357; GO:0007224; GO:0090263; GO:0030900; GO:0021591; GO:0021702; GO:0021549; GO:0008589; GO:0035721; GO:0060271; GO:0097499; GO:0061512; GO:0060020; GO:1903999; GO:0021798; GO:1905799	GO:0005515; GO:0003682	GO:0005737; GO:0005856; GO:0042995; GO:0005929; GO:0030991	TTC21B	73668	TRUE	-0.261587	0.00260707	0.0604524	chr2
ENSMUSG00000030340	ENSMUST00000176655; ENSMUST00000176110; ENSMUST00000176365; ENSMUST00000175966; ENSMUST00000081440; ENSMUST00000176442; ENSMUST00000177329	Scnn1a	protein_coding	protein_coding	sodium channel, nonvoltage-gated 1 alpha [Source:MGI Symbol;Acc:MGI:101782]	0.5654	2599	GO:0006814; GO:0035725; GO:0098662; GO:0006811; GO:0006883; GO:0036254; GO:0050891; GO:0055078; GO:0071468; GO:0098719	GO:0005272; GO:0015267; GO:0015280; GO:0050699	GO:0016020; GO:0016021; GO:0005737; GO:0005887; GO:0016324; GO:0031514; GO:0034706; GO:0060170; GO:0070062	SCNN1A	20276	TRUE	0.409504	0.00261728	0.0605522	chr6
ENSMUSG00000034486	ENSMUST00000036954; ENSMUST00000187633	Gbx2	protein_coding	protein_coding	gastrulation brain homeobox 2 [Source:MGI Symbol;Acc:MGI:95668]	0.5436	1678	GO:0006355; GO:0045944; GO:0006357; GO:0042472; GO:0035239; GO:0021549; GO:0048483; GO:0007411; GO:0001755; GO:0021884; GO:0021930; GO:0001569; GO:0030917; GO:0030902; GO:0021568; GO:0021555; GO:0021794; GO:0051960	GO:0003677; GO:0000981; GO:0000977; GO:1990837; GO:0061629; GO:0001228; GO:0000979	GO:0005634	GBX2	14472	TRUE	-0.413223	0.00261969	0.0605522	chr1
ENSMUSG00000118401	ENSMUST00000238289	Gpr52	protein_coding	protein_coding	G protein-coupled receptor 52 [Source:MGI Symbol;Acc:MGI:3643278]	0.4337	1637	GO:0007186; GO:0007626; GO:0007165; GO:0009410; GO:0007602; GO:0009584; GO:0071482	GO:0004930; GO:0008020	GO:0016021; GO:0016020; GO:0005886; GO:0005887	GPR52	620246	TRUE	-0.626906	0.00263606	0.0607698	chr1
ENSMUSG00000046516	ENSMUST00000050273; ENSMUST00000152868; ENSMUST00000120495; ENSMUST00000144812; ENSMUST00000134709; ENSMUST00000156026	Cox17	protein_coding	protein_coding	cytochrome c oxidase assembly protein 17, copper chaperone [Source:MGI Symbol;Acc:MGI:1333806]	0.4411	1272	GO:0008284; GO:0051238; GO:0033617; GO:1904960	GO:0005507; GO:0016531; GO:0046872; GO:0008047; GO:0043167; GO:1903136	GO:0005758; GO:0005739; GO:0005737	COX17	12856	TRUE	0.213978	0.00263745	0.0607698	chr16
ENSMUSG00000117694	ENSMUST00000235585	Snhg4	protein_coding	protein_coding	small nucleolar RNA host gene 4 [Source:MGI Symbol;Acc:MGI:4937091]	0.5056	360					100503380	TRUE	-0.47314	0.0027026	0.0621727	chr18
ENSMUSG00000050310	ENSMUST00000228918; ENSMUST00000226201; ENSMUST00000226181; ENSMUST00000228266; ENSMUST00000061656	Rictor	protein_coding	protein_coding	RPTOR independent companion of MTOR, complex 2 [Source:MGI Symbol;Acc:MGI:1926007]	0.4139	4346	GO:0010468; GO:0051897; GO:0031532; GO:0007154; GO:0051716; GO:0050731; GO:0033135; GO:0071902; GO:0043087; GO:0031929; GO:0032956; GO:0038203; GO:0009792; GO:2000114; GO:0018105; GO:0001938; GO:0030838; GO:0032008; GO:0016310; GO:0031669; GO:0050727; GO:0042325; GO:0051896; GO:0001932; GO:0007010; GO:0030307; GO:0043066	GO:0005515; GO:0043022; GO:0019901; GO:0060090; GO:0043539	GO:0031932	RICTOR	78757	TRUE	-0.176957	0.00271826	0.0623667	chr15
ENSMUSG00000008140	ENSMUST00000118808; ENSMUST00000239015; ENSMUST00000118515; ENSMUST00000147102; ENSMUST00000150342; ENSMUST00000138328; ENSMUST00000123928	Emc10	protein_coding	protein_coding	ER membrane protein complex subunit 10 [Source:MGI Symbol;Acc:MGI:1916933]	0.6091	1180	GO:0045766; GO:0001525; GO:0001938; GO:0010595; GO:0071816; GO:0045050	GO:0032977	GO:0016020; GO:0016021; GO:0005783; GO:0005789; GO:0005576; GO:0030176; GO:0072546	EMC10	69683	TRUE	0.111439	0.0027196	0.0623667	chr7
ENSMUSG00000033792	ENSMUST00000113557; ENSMUST00000055941; ENSMUST00000134363; ENSMUST00000133875	Atp7a	protein_coding	protein_coding	ATPase, Cu++ transporting, alpha polypeptide [Source:MGI Symbol;Acc:MGI:99400]	0.4167	3664	GO:0071230; GO:0007005; GO:0010468; GO:0043524; GO:0051402; GO:0050679; GO:0051216; GO:0007626; GO:0043588; GO:0006878; GO:0006811; GO:0065008; GO:0051649; GO:0006812; GO:0048812; GO:0043085; GO:0048813; GO:0036120; GO:0042417; GO:0030198; GO:0030199; GO:0048251; GO:0001568; GO:0043473; GO:0010592; GO:0006825; GO:0035434; GO:0001974; GO:0070050; GO:0046034; GO:0045793; GO:0021702; GO:1904754; GO:…	GO:0046872; GO:0005515; GO:0005524; GO:0005507; GO:0000166; GO:0016887; GO:0031267; GO:0019829; GO:0140581; GO:0051087; GO:0032767; GO:1903136; GO:0005375; GO:0016532; GO:0043682	GO:0005634; GO:0005829; GO:0030424; GO:0016020; GO:0016021; GO:0005794; GO:0005886; GO:0048471; GO:0045202; GO:0016324; GO:0042995; GO:0030425; GO:0005783; GO:0043005; GO:0043025; GO:0005768; GO:0031410; GO:0014069; GO:0031901; GO:0030141; GO:0005802; GO:0016323; GO:0033162; GO:0005770; GO:0043204; GO:0005902; GO:0045121; GO:0031252; GO:0031526; GO:0032588; GO:0030140	ATP7A	11977	TRUE	-0.301006	0.00272907	0.0624771	chrX
ENSMUSG00000009470	ENSMUST00000109399; ENSMUST00000109401; ENSMUST00000224099; ENSMUST00000179301; ENSMUST00000224022; ENSMUST00000179271	Tnpo1	protein_coding	protein_coding	transportin 1 [Source:MGI Symbol;Acc:MGI:2681523]	0.4456	4235	GO:0006886; GO:0015031; GO:0006606; GO:0006913	GO:0031267; GO:0005515; GO:0008139; GO:0061608	GO:0005634; GO:0005737	TNPO1	238799	TRUE	-0.165953	0.002733	0.0624771	chr13
ENSMUSG00000020372	ENSMUST00000142269; ENSMUST00000139959; ENSMUST00000020640; ENSMUST00000136703; ENSMUST00000125166; ENSMUST00000136849	Rack1	protein_coding	protein_coding	receptor for activated C kinase 1 [Source:MGI Symbol;Acc:MGI:101849]	0.5074	1528	GO:0010629; GO:0006412; GO:0017148; GO:0071333; GO:0071363; GO:0051898; GO:0051726; GO:0016567; GO:0006417; GO:0007049; GO:0035556; GO:0001934; GO:0006915; GO:0008104; GO:0048511; GO:0030178; GO:0032880; GO:0031334; GO:0043065; GO:0043547; GO:2001244; GO:0006919; GO:0043473; GO:0032091; GO:0030308; GO:0030335; GO:0072344; GO:2000114; GO:0033137; GO:0050765; GO:1903076; GO:0032436; GO:0007369; GO:…	GO:0005515; GO:0038023; GO:0005080; GO:0030332; GO:0043022; GO:0042803; GO:0030971; GO:0051434; GO:0019903; GO:0019899; GO:0042169; GO:0035591; GO:0008656; GO:0008200; GO:0030292	GO:0005739; GO:0005634; GO:0005829; GO:0005737; GO:0005654; GO:0016020; GO:0005886; GO:0048471; GO:0005840; GO:1990904; GO:0042995; GO:0030425; GO:0043204; GO:0043025; GO:0030496; GO:0015935; GO:0001891; GO:0043005; GO:0044297; GO:1990630	RACK1	14694	TRUE	0.119235	0.00274722	0.0627039	chr11
ENSMUSG00000020181	ENSMUST00000032719; ENSMUST00000239301; ENSMUST00000161582; ENSMUST00000238286; ENSMUST00000161223; ENSMUST00000163071; ENSMUST00000161798; ENSMUST00000160159	Nav3	protein_coding	protein_coding	neuron navigator 3 [Source:MGI Symbol;Acc:MGI:2183703]	0.4892	5148	GO:0022008; GO:0007026; GO:0030336; GO:0031116; GO:0032703	GO:0005515; GO:0005524; GO:0016887; GO:0008017	GO:1990752	NAV3	260315	TRUE	-0.230102	0.00277401	0.0629955	chr10
ENSMUSG00000049295	ENSMUST00000226522; ENSMUST00000228580; ENSMUST00000067549; ENSMUST00000166169; ENSMUST00000226474; ENSMUST00000226964; ENSMUST00000228747; ENSMUST00000226527; ENSMUST00000226605; ENSMUST00000228051; ENSMUST00000228162; ENSMUST00000226554; ENSMUST00000227420	Zfp219	protein_coding	protein_coding	zinc finger protein 219 [Source:MGI Symbol;Acc:MGI:1917140]	0.6104	1306	GO:0000122; GO:0045944; GO:0006355; GO:0030154; GO:0045892; GO:0060174; GO:0032332	GO:0000978; GO:0003677; GO:0046872; GO:0000981; GO:0003700; GO:0005515; GO:0001227	GO:0005634; GO:0005654	ZNF219	69890	TRUE	0.15642	0.00277803	0.0629955	chr14
ENSMUSG00000025909	ENSMUST00000132064; ENSMUST00000191683; ENSMUST00000140295; ENSMUST00000140302; ENSMUST00000115484; ENSMUST00000135046; ENSMUST00000115488; ENSMUST00000144593; ENSMUST00000134075; ENSMUST00000194098; ENSMUST00000126083	Sntg1	protein_coding	protein_coding	syntrophin, gamma 1 [Source:MGI Symbol;Acc:MGI:1918346]	0.4368	2734		GO:0005515; GO:0005198; GO:0008022	GO:0005856; GO:0005737; GO:0032587	SNTG1	71096	TRUE	-0.23782	0.00277995	0.0629955	chr1
ENSMUSG00000030124	ENSMUST00000032217; ENSMUST00000139571	Lag3	protein_coding	protein_coding	lymphocyte-activation gene 3 [Source:MGI Symbol;Acc:MGI:106588]	0.5801	1214	GO:0002376; GO:0002250; GO:0042267; GO:0007166; GO:0050868; GO:0032703; GO:0045954; GO:0042110; GO:0045590; GO:0050776; GO:0002270	GO:0005515; GO:0004888; GO:0042289	GO:0016020; GO:0016021; GO:0009897; GO:0005886; GO:0005576	LAG3	16768	TRUE	0.363389	0.00278156	0.0629955	chr6
ENSMUSG00000025153	ENSMUST00000055655; ENSMUST00000206589; ENSMUST00000155276; ENSMUST00000146541; ENSMUST00000206637; ENSMUST00000205905	Fasn	protein_coding	protein_coding	fatty acid synthase [Source:MGI Symbol;Acc:MGI:95485]	0.5917	3578	GO:0009058; GO:0006633; GO:0006954; GO:0090557; GO:0071353; GO:0008152; GO:0006629; GO:0006631; GO:0030224; GO:0006084; GO:0009888; GO:0030223; GO:0002068; GO:0008611; GO:0030879; GO:0044788	GO:0004315; GO:0016740; GO:0016787; GO:0003824; GO:0016491; GO:0016829; GO:0042802; GO:0016746; GO:0004312; GO:0004313; GO:0004314; GO:0004316; GO:0004317; GO:0004320; GO:0008659; GO:0008693; GO:0016295; GO:0016296; GO:0016297; GO:0016419; GO:0019171; GO:0031177; GO:0047117; GO:0047451	GO:0005739; GO:0005829; GO:0005737; GO:0005886; GO:0005794; GO:0042470; GO:0042587	FASN	14104	TRUE	-0.104171	0.00278163	0.0629955	chr11
ENSMUSG00000025499	ENSMUST00000026572; ENSMUST00000168550; ENSMUST00000128993; ENSMUST00000097957; ENSMUST00000124314; ENSMUST00000134008; ENSMUST00000124971	Hras	protein_coding	protein_coding	Harvey rat sarcoma virus oncogene [Source:MGI Symbol;Acc:MGI:96224]	0.5782	1521	GO:0090398; GO:0010629; GO:0010628; GO:0045944; GO:0048146; GO:0008284; GO:0006915; GO:0043524; GO:0032729; GO:0051402; GO:0051726; GO:0006357; GO:0008285; GO:0050679; GO:0060612; GO:0042127; GO:0007165; GO:0001934; GO:0007265; GO:0043410; GO:0042832; GO:0046579; GO:0070374; GO:0043547; GO:0090303; GO:0048144; GO:0050852; GO:0046330; GO:0006897; GO:0098696; GO:0007264; GO:0045740; GO:0030335; GO:…	GO:0005525; GO:0003924; GO:0005515; GO:0044877; GO:0016787; GO:0000166; GO:0019003; GO:0003925; GO:0008022	GO:0005829; GO:0005654; GO:0016020; GO:0000139; GO:0005794; GO:0005886; GO:0043231; GO:0098978; GO:1905360	HRAS	15461	TRUE	0.134458	0.00280706	0.0634727	chr7
ENSMUSG00000024639	ENSMUST00000025541; ENSMUST00000170229; ENSMUST00000167656	Gnaq	protein_coding	protein_coding	guanine nucleotide binding protein, alpha q polypeptide [Source:MGI Symbol;Acc:MGI:95776]	0.49	2329	GO:0007186; GO:0043066; GO:0009791; GO:0007507; GO:0008217; GO:0001501; GO:0010259; GO:0007165; GO:0007189; GO:0050821; GO:1904888; GO:0043267; GO:0042711; GO:0007200; GO:0007215; GO:0007188; GO:0042733; GO:0001508; GO:0048661; GO:0006469; GO:0060828; GO:0021884; GO:0007202; GO:0048066; GO:0016322; GO:0010543; GO:0045634; GO:0060158; GO:0086100	GO:0003924; GO:0019001; GO:0031683; GO:0005515; GO:0044877; GO:0046872; GO:0000166; GO:0005525; GO:0005096; GO:0001664; GO:0047391	GO:0045202; GO:0005829; GO:0005634; GO:0016020; GO:0005794; GO:0005886; GO:0031965; GO:0030425; GO:0044297; GO:0005834; GO:0005901	GNAQ	14682	TRUE	-0.122672	0.00281577	0.0634901	chr19
ENSMUSG00000054226	ENSMUST00000202142; ENSMUST00000200680; ENSMUST00000201289; ENSMUST00000201217; ENSMUST00000202588; ENSMUST00000113751; ENSMUST00000202803; ENSMUST00000113753; ENSMUST00000089570; ENSMUST00000067137; ENSMUST00000113752; ENSMUST00000150249; ENSMUST00000201939; ENSMUST00000149026	Tprkb	protein_coding	protein_coding	Tp53rk binding protein [Source:MGI Symbol;Acc:MGI:1917036]	0.4649	965	GO:0008033; GO:0002949; GO:0000722	GO:0019901	GO:0005634; GO:0005829; GO:0005737; GO:0000408	TPRKB	69786	TRUE	0.172862	0.00281655	0.0634901	chr6
ENSMUSG00000024081	ENSMUST00000024885; ENSMUST00000233484; ENSMUST00000233371; ENSMUST00000233595; ENSMUST00000232899	Cebpz	protein_coding	protein_coding	CCAAT/enhancer binding protein zeta [Source:MGI Symbol;Acc:MGI:109386]	0.4379	1688	GO:0045944	GO:0003713	GO:0005634; GO:0016602	CEBPZ	12607	TRUE	-0.200548	0.00282424	0.063565	chr17
ENSMUSG00000040048	ENSMUST00000141324; ENSMUST00000144285; ENSMUST00000129451; ENSMUST00000045602; ENSMUST00000135708; ENSMUST00000147648	Ndufb10	protein_coding	protein_coding	NADH:ubiquinone oxidoreductase subunit B10 [Source:MGI Symbol;Acc:MGI:1915592]	0.5384	598	GO:0032981; GO:0009060; GO:0042776		GO:0005739; GO:0016020; GO:0005743; GO:0070469; GO:0005747	NDUFB10	68342	TRUE	0.136193	0.00283111	0.0636213	chr17
ENSMUSG00000094910	ENSMUST00000178224	D430019H16Rik	protein_coding	protein_coding	RIKEN cDNA D430019H16 gene [Source:MGI Symbol;Acc:MGI:2443127]	0.5175	5786	GO:0008150	GO:0003674	GO:0005575; GO:0016020; GO:0016021	C14orf132	268595	TRUE	-0.140993	0.00283607	0.0636346	chr12
ENSMUSG00000067194	ENSMUST00000133252; ENSMUST00000087143	Eif1ax	protein_coding	protein_coding	eukaryotic translation initiation factor 1A, X-linked [Source:MGI Symbol;Acc:MGI:1913485]	0.4966	2794	GO:0006413; GO:0006412	GO:0003723; GO:0003743; GO:0005515	GO:0005737	EIF1AX,EIF1AY	66235	TRUE	-0.16371	0.00285387	0.0638161	chrX
ENSMUSG00000029104	ENSMUST00000148953; ENSMUST00000080036; ENSMUST00000123755; ENSMUST00000202059; ENSMUST00000156490; ENSMUST00000201613; ENSMUST00000135039; ENSMUST00000124272	Htt	protein_coding	protein_coding	huntingtin [Source:MGI Symbol;Acc:MGI:96067]	0.4551	3964	GO:0000132; GO:0006890; GO:0007030; GO:0031587; GO:0031648; GO:0042297; GO:0043065; GO:0043666; GO:0045724; GO:0047496; GO:1903599; GO:1904504; GO:1905289; GO:1905337; GO:2000479; GO:2001237	GO:0002039; GO:0005522; GO:0019900; GO:0031072; GO:0034452; GO:0042802; GO:0044325; GO:0045505; GO:0048487	GO:0005634; GO:0005737; GO:0005654; GO:0005769; GO:0005770; GO:0005776; GO:0005783; GO:0005794; GO:0005814; GO:0005829; GO:0016234; GO:0030424; GO:0030425; GO:0030659; GO:0032991; GO:0048471; GO:0099523; GO:0099524	HTT	15194	TRUE	-0.162945	0.00285522	0.0638161	chr5
ENSMUSG00000024083	ENSMUST00000172818; ENSMUST00000024888; ENSMUST00000024889; ENSMUST00000172733; ENSMUST00000232842	Pja2	protein_coding	protein_coding	praja ring finger ubiquitin ligase 2 [Source:MGI Symbol;Acc:MGI:2159342]	0.4134	4333	GO:0006954; GO:0016567; GO:0045087; GO:0035329; GO:0046330; GO:0010738; GO:0043030; GO:1900745; GO:0007616; GO:0034137	GO:0005515; GO:0016740; GO:0046872; GO:0004842; GO:0034237; GO:0034236	GO:0005737; GO:0016020; GO:0000139; GO:0005794; GO:0005886; GO:0005783; GO:0005789; GO:0045202; GO:0014069; GO:0045111	PJA2	224938	TRUE	-0.13937	0.00285731	0.0638161	chr17
ENSMUSG00000044986	ENSMUST00000058659; ENSMUST00000231525	Tst	protein_coding	protein_coding	thiosulfate sulfurtransferase, mitochondrial [Source:MGI Symbol;Acc:MGI:98852]	0.5551	1888	GO:0030855; GO:0019346; GO:0035928; GO:0051029	GO:0004792; GO:0016740; GO:0003723; GO:0016783; GO:0008097	GO:0005739; GO:0005743; GO:0005759	TST	22117	TRUE	0.226821	0.00286826	0.0639626	chr15
ENSMUSG00000010825	ENSMUST00000110733; ENSMUST00000010969; ENSMUST00000120825; ENSMUST00000196148; ENSMUST00000138948	Grid2ip	protein_coding	protein_coding	glutamate receptor, ionotropic, delta 2 (Grid2) interacting protein 1 [Source:MGI Symbol;Acc:MGI:2176213]	0.5971	2927	GO:0007216; GO:0030036; GO:0060292	GO:0005515	GO:0045202; GO:0016020; GO:0005886; GO:0045211; GO:0042995; GO:0043197	GRID2IP	170935	TRUE	-0.324255	0.00287525	0.0639674	chr5
ENSMUSG00000047414	ENSMUST00000057324; ENSMUST00000110117	Flrt2	protein_coding	protein_coding	fibronectin leucine rich transmembrane protein 2 [Source:MGI Symbol;Acc:MGI:3603594]	0.4649	5161	GO:0007155; GO:0008543; GO:0051965; GO:0071711; GO:0007411; GO:0050919; GO:2001222; GO:0003007; GO:0061343	GO:0005515; GO:0045499; GO:0005104	GO:0016020; GO:0016021; GO:0005615; GO:0005886; GO:0005783; GO:0005789; GO:0045202; GO:0070161; GO:0005576; GO:0043005; GO:0005925; GO:0043231; GO:0005887; GO:0005911	FLRT2	399558	TRUE	-0.16922	0.00287806	0.0639674	chr12
ENSMUSG00000042699	ENSMUST00000186380; ENSMUST00000042141; ENSMUST00000186966; ENSMUST00000190544; ENSMUST00000188345; ENSMUST00000189516; ENSMUST00000189509; ENSMUST00000190383; ENSMUST00000189425	Dhx9	protein_coding	protein_coding	DEAH (Asp-Glu-Ala-His) box polypeptide 9 [Source:MGI Symbol;Acc:MGI:108177]	0.4159	2571	GO:0006353; GO:0006354; GO:0000380; GO:0006357; GO:0010501; GO:0032508; GO:0032727; GO:0032728; GO:0032755; GO:0032760; GO:0039695; GO:0044806; GO:0045739; GO:0045740; GO:0045944; GO:0046833; GO:0048146; GO:0050434; GO:0050684; GO:0051092; GO:0060760; GO:0065003; GO:0070922; GO:0070934; GO:0071356; GO:0071360; GO:0098795; GO:1900152; GO:1903608; GO:1904973; GO:1905698; GO:2000373; GO:2000637; GO:…	GO:0005524; GO:0003676; GO:0004386; GO:0016787; GO:0000166; GO:0003723; GO:0003724; GO:0003725; GO:0033679; GO:0000978; GO:0000993; GO:0001069; GO:0003678; GO:0003688; GO:0003690; GO:0003697; GO:0003712; GO:0003713; GO:0003727; GO:0003729; GO:0016887; GO:0031490; GO:0034458; GO:0035197; GO:0035613; GO:0043138; GO:0045142; GO:0047429; GO:0061629; GO:0061676; GO:0070063; GO:1905172; GO:1905538; GO:…	GO:0005634; GO:0005654; GO:0005726; GO:0005730; GO:0005737; GO:0005813; GO:0005829; GO:0005844; GO:0015629; GO:0016442; GO:0016604; GO:0032991; GO:0036464; GO:0042788; GO:0070578; GO:0070937; GO:0097165; GO:1990904	DHX9	13211	TRUE	-0.126653	0.00288582	0.0639674	chr1
ENSMUSG00000034007	ENSMUST00000214747; ENSMUST00000037408; ENSMUST00000216595; ENSMUST00000217647; ENSMUST00000215323	Scaper	protein_coding	protein_coding	S phase cyclin A-associated protein in the ER [Source:MGI Symbol;Acc:MGI:1925976]	0.437	3611	GO:0007283; GO:0060041; GO:0001541; GO:0072520; GO:0001547	GO:0003674; GO:0008270; GO:0003676	GO:0005634; GO:0016607; GO:0005829; GO:0005737; GO:0005654; GO:0061827; GO:1990917	SCAPER	244891	TRUE	-0.184775	0.0028901	0.0639674	chr9
ENSMUSG00000061578	ENSMUST00000240758; ENSMUST00000073347; ENSMUST00000180430	Ksr2	protein_coding	protein_coding	kinase suppressor of ras 2 [Source:MGI Symbol;Acc:MGI:3610315]	0.5355	9519	GO:0006468	GO:0005524; GO:0004672		KSR2	333050	TRUE	-0.165994	0.00289267	0.0639674	chr5
ENSMUSG00000028583	ENSMUST00000030317; ENSMUST00000119654	Pdpn	protein_coding	protein_coding	podoplanin [Source:MGI Symbol;Acc:MGI:103098]	0.4964	1290	GO:0030324; GO:0008283; GO:0098609; GO:0008360; GO:0007266; GO:0000902; GO:0016477; GO:0007165; GO:0006693; GO:0007155; GO:0008285; GO:2000045; GO:0043066; GO:0035239; GO:0030335; GO:0048286; GO:0030155; GO:0010718; GO:0044319; GO:0010572; GO:0070252; GO:1901731; GO:0061032; GO:0090091; GO:0001946; GO:0048535; GO:0055093; GO:0060838; GO:1900024; GO:1904328; GO:2000392	GO:0005102; GO:0005515; GO:0051087; GO:0019956	GO:0005739; GO:0005829; GO:0016020; GO:0016021; GO:0005886; GO:0009897; GO:0031410; GO:0070161; GO:0016323; GO:0045121; GO:0016324; GO:0042995; GO:0030027; GO:0030175; GO:0030054; GO:0031528; GO:0001726; GO:0032587; GO:0031527; GO:0031258; GO:0097197; GO:0061851	PDPN	14726	TRUE	0.293454	0.00289483	0.0639674	chr4
ENSMUSG00000036822	ENSMUST00000042575	Topors	protein_coding	protein_coding	topoisomerase I binding, arginine/serine-rich [Source:MGI Symbol;Acc:MGI:2146189]	0.452	3856	GO:0042127; GO:0006511; GO:0006974; GO:0000209; GO:0043161; GO:0070936; GO:0051457; GO:0045893; GO:0051443; GO:0008630; GO:0016925; GO:0006513; GO:0042771; GO:0034504	GO:0005515; GO:0016740; GO:0046872; GO:0003823; GO:0004842; GO:0003677; GO:0061630; GO:0019789; GO:0044547	GO:0005634; GO:0016607; GO:0005654; GO:0016605; GO:0005814; GO:0032391; GO:0000151; GO:0000922; GO:0036064; GO:0000930	TOPORS	106021	TRUE	-0.169604	0.00290162	0.0640203	chr4
ENSMUSG00000044716	ENSMUST00000101298; ENSMUST00000114270; ENSMUST00000133381; ENSMUST00000050709; ENSMUST00000155097	Dok7	protein_coding	protein_coding	docking protein 7 [Source:MGI Symbol;Acc:MGI:3584043]	0.6064	2126	GO:0006468; GO:0001934; GO:0061098; GO:0007528; GO:0043113	GO:0005515; GO:0008289; GO:0019901; GO:0035091	GO:0005739; GO:0005654; GO:0016020; GO:0005886; GO:0045202; GO:0031594	DOK7	231134	TRUE	0.211232	0.00291662	0.0642539	chr5
ENSMUSG00000061808	ENSMUST00000075312	Ttr	protein_coding	protein_coding	transthyretin [Source:MGI Symbol;Acc:MGI:98865]	0.4646	1186	GO:0007165; GO:0042572; GO:0070327; GO:0006144	GO:0005515; GO:0044877; GO:0042802; GO:0005179; GO:0070324; GO:0042562	GO:0005615; GO:0032991; GO:0005576	TTR	22139	TRUE	-2.46746	0.00294795	0.0646885	chr18
ENSMUSG00000025912	ENSMUST00000088658; ENSMUST00000115468; ENSMUST00000160022; ENSMUST00000160451; ENSMUST00000188212	Mybl1	protein_coding	protein_coding	myeloblastosis oncogene-like 1 [Source:MGI Symbol;Acc:MGI:99925]	0.3922	1902	GO:0006355; GO:0045944	GO:0003677; GO:0003700; GO:0043565; GO:0000978; GO:0001228	GO:0005634; GO:0005654	MYBL1	17864	TRUE	-0.399814	0.00294951	0.0646885	chr1
ENSMUSG00000063358	ENSMUST00000232611; ENSMUST00000069107; ENSMUST00000115731; ENSMUST00000231420; ENSMUST00000232281; ENSMUST00000231821; ENSMUST00000232067; ENSMUST00000232630; ENSMUST00000232480	Mapk1	protein_coding	protein_coding	mitogen-activated protein kinase 1 [Source:MGI Symbol;Acc:MGI:1346858]	0.4482	1483	GO:0006468; GO:0060291; GO:0010628; GO:0045596; GO:0071356; GO:0070371; GO:0007507; GO:0043627; GO:0032496; GO:0045727; GO:0048538; GO:0032212; GO:0007568; GO:0007166; GO:0016310; GO:0007049; GO:0035556; GO:0045893; GO:0033598; GO:0071310; GO:0006915; GO:0000165; GO:0032872; GO:0051493; GO:0072584; GO:0090170; GO:2000641; GO:0038127; GO:0060045; GO:0010800; GO:0007165; GO:0006974; GO:0034614; GO:…	GO:0005524; GO:0004672; GO:0004707; GO:0005515; GO:0016740; GO:0000166; GO:0016301; GO:0004674; GO:0042802; GO:0106310; GO:0019901; GO:0019902; GO:0003690; GO:0001784; GO:0004708; GO:0031435; GO:0008353	GO:0005739; GO:0005634; GO:0014069; GO:0005829; GO:0005737; GO:0030424; GO:0005654; GO:0016020; GO:0005794; GO:0005886; GO:0032991; GO:0005815; GO:0070161; GO:0005856; GO:0005925; GO:0005770; GO:0005769; GO:0005819; GO:0005901; GO:0043204; GO:0031143; GO:0032839; GO:0072686	MAPK1	26413	TRUE	-0.11927	0.00294967	0.0646885	chr16
ENSMUSG00000025503	ENSMUST00000211654; ENSMUST00000026576; ENSMUST00000141793; ENSMUST00000211759; ENSMUST00000125597	Taldo1	protein_coding	protein_coding	transaldolase 1 [Source:MGI Symbol;Acc:MGI:1274789]	0.5356	1022	GO:0005975; GO:0006002; GO:0006098; GO:0009052; GO:0019682	GO:0016740; GO:0004801; GO:0030246; GO:0048029	GO:0005737; GO:0005829; GO:0043231; GO:0005634	TALDO1	21351	TRUE	0.171063	0.0029684	0.0650013	chr7
ENSMUSG00000028998	ENSMUST00000030851	Tomm7	protein_coding	protein_coding	translocase of outer mitochondrial membrane 7 [Source:MGI Symbol;Acc:MGI:1913419]	0.44	1125	GO:0030150; GO:0015031; GO:0031647; GO:1903955; GO:0098779		GO:0005742; GO:0005739; GO:0016020; GO:0016021; GO:0005741	TOMM7	66169	TRUE	0.219058	0.00298078	0.0651743	chr5
ENSMUSG00000028991	ENSMUST00000123566; ENSMUST00000103221; ENSMUST00000057580; ENSMUST00000129715	Mtor	protein_coding	protein_coding	mechanistic target of rapamycin kinase [Source:MGI Symbol;Acc:MGI:1928394]	0.5234	3098	GO:0071230; GO:0010628; GO:0009791; GO:0035264; GO:0006954; GO:0090559; GO:0006468; GO:0010976; GO:0050769; GO:0055013; GO:0032868; GO:0051897; GO:0031641; GO:0048714; GO:0008361; GO:0003007; GO:0001933; GO:0009267; GO:0038202; GO:0048709; GO:0045727; GO:0035176; GO:0016310; GO:0051128; GO:0001932; GO:0045859; GO:0009408; GO:0001934; GO:0031397; GO:0048511; GO:0007584; GO:0016043; GO:0006950; GO:…	GO:0005515; GO:0016301; GO:0044877; GO:0045182; GO:0016740; GO:0000166; GO:0005524; GO:0004674; GO:0043022; GO:0042802; GO:0004672; GO:0106310; GO:0019901; GO:0019904; GO:0051219; GO:0001002; GO:0001003; GO:0001006; GO:0001156	GO:0005634; GO:0005829; GO:0005737; GO:0016020; GO:0000139; GO:0005794; GO:0005783; GO:0005789; GO:0032991; GO:0005739; GO:0031410; GO:0005764; GO:0043025; GO:0005765; GO:0005741; GO:0005635; GO:0030425; GO:0098978; GO:0099524; GO:0016605; GO:0045335; GO:0031932; GO:0012505; GO:0031931	MTOR	56717	TRUE	-0.136214	0.0029884	0.065204	chr4
ENSMUSG00000050856	ENSMUST00000049628; ENSMUST00000118632; ENSMUST00000123184	Atp5k	protein_coding	protein_coding	ATP synthase, H+ transporting, mitochondrial F1F0 complex, subunit E [Source:MGI Symbol;Acc:MGI:106636]	0.5494	402	GO:0015986; GO:0006811; GO:1902600; GO:0006754; GO:0046034; GO:0042776	GO:0015078; GO:0044877; GO:0046933	GO:0000276; GO:0005739; GO:0016020; GO:0005743; GO:0045263; GO:0005753	ATP5ME	11958	TRUE	0.200324	0.00299109	0.065204	chr5
ENSMUSG00000025626	ENSMUST00000078944; ENSMUST00000101587; ENSMUST00000154864; ENSMUST00000177780; ENSMUST00000179014	Phf6	protein_coding	protein_coding	PHD finger protein 6 [Source:MGI Symbol;Acc:MGI:1918248]	0.4315	2365	GO:0000122; GO:0006357; GO:0001835	GO:0043021; GO:0042393; GO:0003677; GO:0046872; GO:0042826; GO:0019899; GO:0015631; GO:0097110; GO:0051219	GO:0005634; GO:0005730; GO:0005654; GO:0000775; GO:0000776; GO:0005694	PHF6	70998	TRUE	-0.272421	0.00300286	0.0653167	chrX
ENSMUSG00000048096	ENSMUST00000059352	Lmod1	protein_coding	protein_coding	leiomodin 1 (smooth muscle) [Source:MGI Symbol;Acc:MGI:2135671]	0.535	3948	GO:0051694; GO:0006936; GO:0030838; GO:0045010	GO:0003779; GO:0005523	GO:0005856; GO:0030017; GO:0005829; GO:0005884; GO:0030016	LMOD1	93689	TRUE	0.68026	0.00300593	0.0653167	chr1
ENSMUSG00000022604	ENSMUST00000023270; ENSMUST00000118500; ENSMUST00000117468; ENSMUST00000122280; ENSMUST00000121129; ENSMUST00000121703	Cep97	protein_coding	protein_coding	centrosomal protein 97 [Source:MGI Symbol;Acc:MGI:1921451]	0.4465	2807	GO:0030030; GO:1902018; GO:1901673	GO:0005515; GO:0003674	GO:0005737; GO:0032991; GO:0005815; GO:0005856; GO:0005814; GO:0005813	CEP97	74201	TRUE	-0.22376	0.00300987	0.0653167	chr16
ENSMUSG00000028857	ENSMUST00000105907; ENSMUST00000137622; ENSMUST00000139030; ENSMUST00000134781; ENSMUST00000132713; ENSMUST00000153059	Tmem222	protein_coding	protein_coding	transmembrane protein 222 [Source:MGI Symbol;Acc:MGI:1098568]	0.5779	690	GO:0008150	GO:0003674	GO:0005575; GO:0016020; GO:0016021; GO:0042995; GO:0030425	TMEM222	52174	TRUE	0.137446	0.00302237	0.0653167	chr4
ENSMUSG00000035585	ENSMUST00000205734; ENSMUST00000108630; ENSMUST00000123088; ENSMUST00000205287; ENSMUST00000038521; ENSMUST00000139396; ENSMUST00000108629; ENSMUST00000142713; ENSMUST00000137204; ENSMUST00000155060; ENSMUST00000108627; ENSMUST00000147288	Tsen34	protein_coding	protein_coding	tRNA splicing endonuclease subunit 34 [Source:MGI Symbol;Acc:MGI:1913328]	0.6101	978	GO:0006388; GO:0090501; GO:0090502; GO:0006397; GO:0008033; GO:0000379	GO:0000213; GO:0003676; GO:0016829	GO:0005654; GO:0005634; GO:0005730; GO:0000214	TSEN34	66078	TRUE	0.142491	0.00302497	0.0653167	chr7
ENSMUSG00000037373	ENSMUST00000079746; ENSMUST00000201575; ENSMUST00000202868; ENSMUST00000202962; ENSMUST00000202135; ENSMUST00000201514; ENSMUST00000201275; ENSMUST00000201372; ENSMUST00000202820; ENSMUST00000202632; ENSMUST00000200899; ENSMUST00000202190	Ctbp1	protein_coding	protein_coding	C-terminal binding protein 1 [Source:MGI Symbol;Acc:MGI:1201685]	0.571	1307	GO:0000122; GO:0051726; GO:0006357; GO:0030154; GO:0045892; GO:0045893; GO:0031507; GO:0050872; GO:0031065; GO:0035067; GO:0090241; GO:0099526	GO:0051287; GO:0016616; GO:0005515; GO:0003682; GO:0016491; GO:0042802; GO:0042803; GO:0003714; GO:0019904; GO:0030165; GO:0140297; GO:0003713; GO:0001222; GO:0061629; GO:0001221	GO:0005634; GO:0005737; GO:0005654; GO:0098978; GO:0098982; GO:0017053; GO:0098793; GO:0098831	CTBP1	13016	TRUE	0.0914941	0.00302606	0.0653167	chr5
ENSMUSG00000024501	ENSMUST00000121805; ENSMUST00000237707; ENSMUST00000118043; ENSMUST00000025379; ENSMUST00000124207; ENSMUST00000118071	Dpysl3	protein_coding	protein_coding	dihydropyrimidinase-like 3 [Source:MGI Symbol;Acc:MGI:1349762]	0.525	2213	GO:0051017; GO:0030334; GO:0010975; GO:0010976; GO:0010977; GO:0030336; GO:0048666; GO:0048678; GO:0051491; GO:0051764; GO:0007399; GO:0071345	GO:0016787; GO:0016810; GO:0017124; GO:0031005; GO:0035374; GO:0042802; GO:0005515; GO:0051219	GO:0005737; GO:0030426; GO:0042995; GO:0005615; GO:0005829; GO:0030027; GO:0031941; GO:0044297; GO:0045202; GO:0070382	DPYSL3	22240	TRUE	-0.166539	0.00302766	0.0653167	chr18
ENSMUSG00000034591	ENSMUST00000039956; ENSMUST00000139329; ENSMUST00000154926; ENSMUST00000126617; ENSMUST00000154730	Slc41a2	protein_coding	protein_coding	solute carrier family 41, member 2 [Source:MGI Symbol;Acc:MGI:2442940]	0.455	1361	GO:0006812; GO:0006811; GO:0098655; GO:1903830; GO:0030001	GO:0008324; GO:0015095; GO:0022890	GO:0016020; GO:0016021; GO:0005886	SLC41A2	338365	TRUE	-0.237417	0.00303303	0.0653357	chr10
ENSMUSG00000034755	ENSMUST00000113364; ENSMUST00000050239; ENSMUST00000192977; ENSMUST00000113358; ENSMUST00000195088; ENSMUST00000192677; ENSMUST00000193899; ENSMUST00000155223; ENSMUST00000191653	Pcdh11x	protein_coding	protein_coding	protocadherin 11 X-linked [Source:MGI Symbol;Acc:MGI:2442849]	0.4386	4630	GO:0007156; GO:0007155	GO:0005509; GO:0005515	GO:0016020; GO:0005886; GO:0016021; GO:0005887; GO:0061827; GO:0097225	PCDH11X,PCDH11Y	245578	TRUE	-0.344702	0.00305531	0.0655227	chrX
ENSMUSG00000041958	ENSMUST00000048073	Pigs	protein_coding	protein_coding	phosphatidylinositol glycan anchor biosynthesis, class S [Source:MGI Symbol;Acc:MGI:2687325]	0.5626	2501	GO:0016255; GO:0006506		GO:0042765; GO:0016020; GO:0016021; GO:0005783; GO:0005789	PIGS	276846	TRUE	0.136925	0.00305917	0.0655227	chr11
ENSMUSG00000058013	ENSMUST00000074733; ENSMUST00000201377; ENSMUST00000201700; ENSMUST00000202196; ENSMUST00000202308; ENSMUST00000201421; ENSMUST00000202415; ENSMUST00000202217; ENSMUST00000201695	Septin11	protein_coding	protein_coding	septin 11 [Source:MGI Symbol;Acc:MGI:1277214]	0.5074	1929	GO:0007049; GO:0051301; GO:0008104; GO:0061640; GO:0050807	GO:0005525; GO:0005515; GO:0000166; GO:0003924; GO:0060090	GO:0005737; GO:0045202; GO:0005856; GO:0042995; GO:0030424; GO:0098978; GO:0043197; GO:0005940; GO:0015630; GO:0032153; GO:0031105; GO:0001725; GO:0098794; GO:0098982; GO:0099629	SEPTIN11	52398	TRUE	-0.12436	0.00306229	0.0655227	chr5
ENSMUSG00000027907	ENSMUST00000029515	S100a11	protein_coding	protein_coding	S100 calcium binding protein A11 [Source:MGI Symbol;Acc:MGI:1338798]	0.4951	511	GO:0042127; GO:0014911	GO:0005509; GO:0046872; GO:0048306; GO:0042803; GO:0044548	GO:0005634; GO:0005737; GO:0005615; GO:0001726; GO:0062023	S100A11	20195	TRUE	0.41645	0.00306232	0.0655227	chr3
ENSMUSG00000022682	ENSMUST00000230102; ENSMUST00000023363	Rrn3	protein_coding	protein_coding	RRN3 RNA polymerase I transcription factor homolog (yeast) [Source:MGI Symbol;Acc:MGI:1925255]	0.4638	2276	GO:0006361; GO:0001701; GO:0048872; GO:0010976; GO:0045893; GO:0042254; GO:0001188; GO:0006352; GO:0048144; GO:0007000; GO:0007028; GO:0072332; GO:1902254; GO:2000142	GO:0001181; GO:0070063; GO:0001042; GO:0001164	GO:0005730; GO:0005634	RRN3,RRN3P1,RRN3P2	106298	TRUE	-0.13113	0.00306741	0.0655227	chr16
ENSMUSG00000028514	ENSMUST00000165709; ENSMUST00000106798; ENSMUST00000094933; ENSMUST00000150521	Usp24	protein_coding	protein_coding	ubiquitin specific peptidase 24 [Source:MGI Symbol;Acc:MGI:1919936]	0.4786	6184	GO:0006511; GO:0016579; GO:0006508	GO:0004843; GO:0016787; GO:0008233; GO:0008234; GO:0004197	GO:0005829; GO:0005634	USP24	329908	TRUE	-0.18054	0.00306935	0.0655227	chr4
ENSMUSG00000033364	ENSMUST00000044260; ENSMUST00000189257; ENSMUST00000188012; ENSMUST00000191058; ENSMUST00000186282; ENSMUST00000190592; ENSMUST00000187590	Usp37	protein_coding	protein_coding	ubiquitin specific peptidase 37 [Source:MGI Symbol;Acc:MGI:2442483]	0.441	3022	GO:0006511; GO:0016579; GO:0006508; GO:0007049; GO:0051301; GO:0000082; GO:0006275; GO:0071108; GO:0035871	GO:0004843; GO:0016787; GO:0008233; GO:0008234; GO:0004197; GO:0019901	GO:0005634; GO:0005829	USP37	319651	TRUE	-0.172808	0.00307681	0.0655227	chr1
ENSMUSG00000035674	ENSMUST00000076657; ENSMUST00000150497; ENSMUST00000156712; ENSMUST00000108644; ENSMUST00000148403; ENSMUST00000134683	Ndufa3	protein_coding	protein_coding	NADH:ubiquinone oxidoreductase subunit A3 [Source:MGI Symbol;Acc:MGI:1913341]	0.5434	433	GO:0032981; GO:0009060; GO:0042776	GO:0003674	GO:0005743; GO:0005747; GO:0005739; GO:0016020; GO:0016021; GO:0070469	NDUFA3	66091	TRUE	0.226174	0.0030777	0.0655227	chr7
ENSMUSG00000060882	ENSMUST00000081542	Kcnd2	protein_coding	protein_coding	potassium voltage-gated channel, Shal-related family, member 2 [Source:MGI Symbol;Acc:MGI:102663]	0.4435	5152	GO:0055085; GO:0006811; GO:0051260; GO:0071456; GO:0006813; GO:0060078; GO:0034765; GO:0071805; GO:0019228; GO:0001508; GO:0019233; GO:0045475; GO:0086001	GO:0005216; GO:0005515; GO:0044877; GO:0046872; GO:0005244; GO:0005249; GO:0005267; GO:1905030; GO:0005250	GO:0016020; GO:0014069; GO:0016021; GO:0005886; GO:0045202; GO:0045211; GO:0070161; GO:0008076; GO:0042995; GO:0030315; GO:0030425; GO:0042383; GO:0043204; GO:0043005; GO:0044853; GO:0005887; GO:0043025; GO:0098978; GO:0005901; GO:0098982; GO:0043197; GO:0097038; GO:0099055; GO:0032809; GO:0031226; GO:0034705; GO:0099060	KCND2	16508	TRUE	-0.234276	0.00309242	0.0657398	chr6
[truncated: 13,877 more rows]
