# Supplementary material for: Structural Magnetic Resonance Imaging and Genome-Wide Transcriptional Profiling Reveal Intergenerational Vulnerability in a Mouse Model of Preconceptional Stress
Source: Research Square preprint supplement (doi:10.21203/rs.3.rs-7535749/v1), 2025-10-01
Supplement: Supplementary file 4 [file a0034aad0d5f042ae8c57e8c.xlsx]

## Sheet: ANOVA - Absolute Volumes
ROI	Effect	DFn	DFd	F	p	p<.05	pes	FDR	FDR.signif
Amygdala	group	1	43	0.08	0.779		0.002	0.909782	ns
Amygdala	sex	1	43	11.189	0.002	*	0.206	0.0230526	*
Amygdala	group:sex	1	43	0.043	0.836		0.001	0.935219	ns
Arbor Vitae	group	1	43	0.094	0.761		0.002	0.905595	ns
Arbor Vitae	sex	1	43	13.482	0.000661	*	0.239	0.0096506	**
Arbor Vitae	group:sex	1	43	3.904	0.055		0.083	0.245816	ns
Auditory Cortex	group	1	43	0.288	0.594		0.007	0.819528	ns
Auditory Cortex	sex	1	43	24.913	1.04e-05	*	0.367	0.0005694	***
Auditory Cortex	group:sex	1	43	1.114	0.297		0.025	0.60225	ns
Bed Nuclei	group	1	43	0.195	0.661		0.005	0.861661	ns
Bed Nuclei	sex	1	43	7.688	0.008	*	0.152	0.0648889	ns
Bed Nuclei	group:sex	1	43	0.004	0.949		9.47e-05	0.971173	ns
Cerebellar Cortex	group	1	43	0.592	0.446		0.014	0.712949	ns
Cerebellar Cortex	sex	1	43	12.468	0.001	*	0.225	0.0121667	*
Cerebellar Cortex	group:sex	1	43	2.214	0.144		0.049	0.441042	ns
Cerebellar Nuclei	group	1	43	0.917	0.344		0.021	0.626231	ns
Cerebellar Nuclei	sex	1	43	4.746	0.035	*	0.099	0.186951	ns
Cerebellar Nuclei	group:sex	1	43	2.266	0.14		0.05	0.438	ns
Cerebellar White Matter	group	1	43	1.669	0.203		0.037	0.516942	ns
Cerebellar White Matter	sex	1	43	1.05	0.311		0.024	0.610071	ns
Cerebellar White Matter	group:sex	1	43	3.013	0.09		0.065	0.347379	ns
Cerebral Aqueduct	group	1	43	0.121	0.73		0.003	0.88326	ns
Cerebral Aqueduct	sex	1	43	6.029	0.018	*	0.123	0.115941	ns
Cerebral Aqueduct	group:sex	1	43	0.99	0.325		0.023	0.620817	ns
Choroid Plexus	group	1	43	1.223	0.275		0.028	0.590441	ns
Choroid Plexus	sex	1	43	0.183	0.671		0.004	0.864406	ns
Choroid Plexus	group:sex	1	43	0.023	0.879		0.000545	0.9636	ns
Cingulate Cortex	group	1	43	0.503	0.482		0.012	0.743366	ns
Cingulate Cortex	sex	1	43	20.918	4.03e-05	*	0.327	0.00176514	**
Cingulate Cortex	group:sex	1	43	0.003	0.957		6.76e-05	0.973333	ns
Claustrum	group	1	43	1.911	0.174		0.043	0.488538	ns
Claustrum	sex	1	43	5.101	0.029	*	0.106	0.167132	ns
Claustrum	group:sex	1	43	0.409	0.526		0.009	0.794441	ns
Corpus Callosum	group	1	43	0.664	0.42		0.015	0.698477	ns
Corpus Callosum	sex	1	43	16.228	0.000225	*	0.274	0.00443475	**
Corpus Callosum	group:sex	1	43	0.002	0.966		4.21e-05	0.97445	ns
Cortical Subplate	group	1	43	0.037	0.848		0.000863	0.942701	ns
Cortical Subplate	sex	1	43	16.093	0.000236	*	0.272	0.00443475	**
Cortical Subplate	group:sex	1	43	0.216	0.644		0.005	0.854764	ns
Diagonal Band	group	1	43	4.025	0.051		0.086	0.232687	ns
Diagonal Band	sex	1	43	4.132	0.048	*	0.088	0.228319	ns
Diagonal Band	group:sex	1	43	8.376	0.006	*	0.163	0.0597273	ns
Dorsal Peduncular Area	group	1	43	0.011	0.918		0.000248	0.966299	ns
Dorsal Peduncular Area	sex	1	43	11.717	0.001	*	0.214	0.0121667	*
Dorsal Peduncular Area	group:sex	1	43	1.463	0.233		0.033	0.5475	ns
Entorhinal Cortex	group	1	43	2.966	0.092		0.065	0.347379	ns
Entorhinal Cortex	sex	1	43	1.883	0.177		0.042	0.490671	ns
Entorhinal Cortex	group:sex	1	43	0.126	0.724		0.003	0.880867	ns
Fiber Tracts	group	1	43	0.639	0.429		0.015	0.704396	ns
Fiber Tracts	sex	1	43	1.761	0.192		0.039	0.51278	ns
Fiber Tracts	group:sex	1	43	0.988	0.326		0.022	0.620817	ns
Fimbria Fornix	group	1	43	0.148	0.702		0.003	0.867388	ns
Fimbria Fornix	sex	1	43	1.419	0.24		0.032	0.5475	ns
Fimbria Fornix	group:sex	1	43	0.255	0.616		0.006	0.822585	ns
Flocculus	group	1	43	0.693	0.41		0.016	0.696047	ns
Flocculus	sex	1	43	0.315	0.577		0.007	0.815635	ns
Flocculus	group:sex	1	43	2.798	0.102		0.061	0.354571	ns
Fourth Ventricle	group	1	43	0.311	0.58		0.007	0.815635	ns
Fourth Ventricle	sex	1	43	3.71	0.061		0.079	0.256904	ns
Fourth Ventricle	group:sex	1	43	1.012	0.32		0.023	0.620177	ns
Frontal Cortex	group	1	43	0.364	0.549		0.008	0.80154	ns
Frontal Cortex	sex	1	43	14.365	0.000464	*	0.25	0.00725829	**
Frontal Cortex	group:sex	1	43	0.007	0.936		0.000154	0.966906	ns
Gustatory And Visceral Cortex	group	1	43	9.795	0.003	*	0.186	0.03285	*
Gustatory And Visceral Cortex	sex	1	43	5.733	0.021	*	0.118	0.12775	ns
Gustatory And Visceral Cortex	group:sex	1	43	0.255	0.616		0.006	0.822585	ns
Habenula	group	1	43	2.354	0.132		0.052	0.418957	ns
Habenula	sex	1	43	4.448	0.041	*	0.094	0.208814	ns
Habenula	group:sex	1	43	0.023	0.88		0.000539	0.9636	ns
Hippocampus Dorsal	group	1	43	0.092	0.762		0.002	0.905595	ns
Hippocampus Dorsal	sex	1	43	0.01	0.922		0.000226	0.966299	ns
Hippocampus Dorsal	group:sex	1	43	0.008	0.931		0.000175	0.966299	ns
Hippocampus Ventral	group	1	43	1.165	0.286		0.026	0.590887	ns
Hippocampus Ventral	sex	1	43	2.896	0.096		0.063	0.353226	ns
Hippocampus Ventral	group:sex	1	43	0.485	0.49		0.011	0.75042	ns
Hypothalamus	group	1	43	0.153	0.698		0.004	0.867388	ns
Hypothalamus	sex	1	43	1.176	0.284		0.027	0.590887	ns
Hypothalamus	group:sex	1	43	1.693	0.2		0.038	0.516942	ns
Inferior Colliculus	group	1	43	2.994	0.091		0.065	0.347379	ns
Inferior Colliculus	sex	1	43	6.676	0.013	*	0.134	0.0889687	ns
Inferior Colliculus	group:sex	1	43	2.036	0.161		0.045	0.47012	ns
Infralimbic Cortex	group	1	43	0.15	0.701		0.003	0.867388	ns
Infralimbic Cortex	sex	1	43	16.044	0.000241	*	0.272	0.00443475	**
Infralimbic Cortex	group:sex	1	43	1.642	0.207		0.037	0.517636	ns
Insular Cortex	group	1	43	2.831	0.1		0.062	0.353226	ns
Insular Cortex	sex	1	43	7.178	0.01	*	0.143	0.073	ns
Insular Cortex	group:sex	1	43	0.353	0.555		0.008	0.804934	ns
Internal Capsule	group	1	43	0.915	0.344		0.021	0.626231	ns
Internal Capsule	sex	1	43	7.938	0.007	*	0.156	0.06132	ns
Internal Capsule	group:sex	1	43	1.968	0.168		0.044	0.480662	ns
Lateral Geniculate	group	1	43	1.311	0.259		0.03	0.575152	ns
Lateral Geniculate	sex	1	43	7.892	0.007	*	0.155	0.06132	ns
Lateral Geniculate	group:sex	1	43	1.684	0.201		0.038	0.516942	ns
Lateral Ventricle	group	1	43	1.439	0.237		0.032	0.5475	ns
Lateral Ventricle	sex	1	43	0.005	0.946		0.000107	0.971173	ns
Lateral Ventricle	group:sex	1	43	0.661	0.421		0.015	0.698477	ns
Medial Geniculate	group	1	43	5.724	0.021	*	0.117	0.12775	ns
Medial Geniculate	sex	1	43	4.631	0.037	*	0.097	0.192929	ns
Medial Geniculate	group:sex	1	43	0.915	0.344		0.021	0.626231	ns
Medulla	group	1	43	3.513	0.068		0.076	0.280981	ns
Medulla	sex	1	43	0.008	0.929		0.000189	0.966299	ns
Medulla	group:sex	1	43	3.79	0.058		0.081	0.25404	ns
Midbrain	group	1	43	2.836	0.099		0.062	0.353226	ns
Midbrain	sex	1	43	0.2	0.657		0.005	0.861575	ns
Midbrain	group:sex	1	43	1.857	0.18		0.041	0.49275	ns
Midbrain White Matter	group	1	43	2.407	0.128		0.053	0.412235	ns
Midbrain White Matter	sex	1	43	0.024	0.877		0.000562	0.9636	ns
Midbrain White Matter	group:sex	1	43	3.73	0.06		0.08	0.256904	ns
Motor Cortex	group	1	43	7.583	0.009	*	0.15	0.0679655	ns
Motor Cortex	sex	1	43	18.122	0.00011	*	0.296	0.00400457	**
Motor Cortex	group:sex	1	43	0.046	0.832		0.001	0.935219	ns
Nodulus	group	1	43	0.273	0.604		0.006	0.820574	ns
Nodulus	sex	1	43	1.046	0.312		0.024	0.610071	ns
Nodulus	group:sex	1	43	1.338	0.254		0.03	0.573464	ns
Nucleus Accumbens	group	1	43	0.281	0.599		0.006	0.819881	ns
Nucleus Accumbens	sex	1	43	1.961	0.169		0.044	0.480662	ns
Nucleus Accumbens	group:sex	1	43	0.079	0.781		0.002	0.909782	ns
Nucleus Of Posterior Commussure	group	1	43	5.026	0.03	*	0.105	0.168462	ns
Nucleus Of Posterior Commussure	sex	1	43	2.846	0.099		0.062	0.353226	ns
Nucleus Of Posterior Commussure	group:sex	1	43	1.763	0.191		0.039	0.51278	ns
Olfactory Cortex	group	1	43	1.089	0.302		0.025	0.603245	ns
Olfactory Cortex	sex	1	43	2.038	0.161		0.045	0.47012	ns
Olfactory Cortex	group:sex	1	43	0.293	0.591		0.007	0.819528	ns
Olfactory Tracts	group	1	43	0.696	0.409		0.016	0.696047	ns
Olfactory Tracts	sex	1	43	0.186	0.668		0.004	0.864406	ns
Olfactory Tracts	group:sex	1	43	0.377	0.542		0.009	0.796631	ns
Optic Tract	group	1	43	0.632	0.431		0.014	0.704396	ns
Optic Tract	sex	1	43	0.387	0.537		0.009	0.794615	ns
Optic Tract	group:sex	1	43	1.087	0.303		0.025	0.603245	ns
Orbital Cortex	group	1	43	0.167	0.685		0.004	0.867388	ns
Orbital Cortex	sex	1	43	14.402	0.000457	*	0.251	0.00725829	**
Orbital Cortex	group:sex	1	43	0.145	0.705		0.003	0.867388	ns
Pallidum	group	1	43	3.003	0.09		0.065	0.347379	ns
Pallidum	sex	1	43	1.528	0.223		0.034	0.542633	ns
Pallidum	group:sex	1	43	0.209	0.65		0.005	0.85753	ns
Parietal Cortex	group	1	43	0.977	0.329		0.022	0.621129	ns
Parietal Cortex	sex	1	43	7.548	0.009	*	0.149	0.0679655	ns
Parietal Cortex	group:sex	1	43	0.337	0.565		0.008	0.814046	ns
Pedunculopontine Nucleus	group	1	43	3.402	0.072		0.073	0.292	ns
Pedunculopontine Nucleus	sex	1	43	0.31	0.581		0.007	0.815635	ns
Pedunculopontine Nucleus	group:sex	1	43	1.174	0.285		0.027	0.590887	ns
Periaqueductal Gray	group	1	43	2.55	0.118		0.056	0.391545	ns
Periaqueductal Gray	sex	1	43	1.465	0.233		0.033	0.5475	ns
Periaqueductal Gray	group:sex	1	43	0.914	0.344		0.021	0.626231	ns
Perirhinal Cortex	group	1	43	0.019	0.891		0.00044	0.966299	ns
Perirhinal Cortex	sex	1	43	28.686	3.13e-06	*	0.4	0.00034274	***
Perirhinal Cortex	group:sex	1	43	1.57	0.217		0.035	0.533966	ns
Piriform Cortex	group	1	43	0.011	0.918		0.000248	0.966299	ns
Piriform Cortex	sex	1	43	16.509	0.000202	*	0.277	0.00443475	**
Piriform Cortex	group:sex	1	43	0.016	0.9		0.000369	0.966299	ns
Pons	group	1	43	4.121	0.049	*	0.087	0.228319	ns
Pons	sex	1	43	0.003	0.96		6.04e-05	0.973333	ns
Pons	group:sex	1	43	0.507	0.48		0.012	0.743366	ns
Postrhinal Cortex	group	1	43	0.053	0.819		0.001	0.934172	ns
Postrhinal Cortex	sex	1	43	7.967	0.007	*	0.156	0.06132	ns
Postrhinal Cortex	group:sex	1	43	0.909	0.346		0.021	0.626231	ns
Prelimbic Cortex	group	1	43	0.286	0.595		0.007	0.819528	ns
Prelimbic Cortex	sex	1	43	29.296	2.6e-06	*	0.405	0.00034274	***
Prelimbic Cortex	group:sex	1	43	0.09	0.765		0.002	0.905595	ns
Pretectal	group	1	43	0.611	0.439		0.014	0.708529	ns
Pretectal	sex	1	43	1.709	0.198		0.038	0.516942	ns
Pretectal	group:sex	1	43	4.18	0.047	*	0.089	0.228319	ns
Raphe	group	1	43	0.00042	0.984		9.77e-06	0.984	ns
Raphe	sex	1	43	1.237	0.272		0.028	0.589782	ns
Raphe	group:sex	1	43	0.575	0.452		0.013	0.717304	ns
Red Nucleus	group	1	43	0.01	0.922		0.000228	0.966299	ns
Red Nucleus	sex	1	43	0.085	0.772		0.002	0.908968	ns
Red Nucleus	group:sex	1	43	1.439	0.237		0.032	0.5475	ns
Reticular Nucleus	group	1	43	0.768	0.386		0.018	0.676272	ns
Reticular Nucleus	sex	1	43	0.01	0.921		0.000228	0.966299	ns
Reticular Nucleus	group:sex	1	43	2.126	0.152		0.047	0.456	ns
Retrosplenial Cortex	group	1	43	0.393	0.534		0.009	0.794615	ns
Retrosplenial Cortex	sex	1	43	0.863	0.358		0.02	0.642639	ns
Retrosplenial Cortex	group:sex	1	43	0.416	0.522		0.01	0.793875	ns
Secondary Sensory Cortex	group	1	43	0.053	0.819		0.001	0.934172	ns
Secondary Sensory Cortex	sex	1	43	16.022	0.000243	*	0.271	0.00443475	**
Secondary Sensory Cortex	group:sex	1	43	0.154	0.697		0.004	0.867388	ns
Sensory Cortex	group	1	43	0.01	0.922		0.000224	0.966299	ns
Sensory Cortex	sex	1	43	24.985	1.02e-05	*	0.368	0.0005694	***
Sensory Cortex	group:sex	1	43	0.065	0.8		0.002	0.922105	ns
Septum	group	1	43	4.274	0.045	*	0.09	0.223977	ns
Septum	sex	1	43	0.727	0.399		0.017	0.688039	ns
Septum	group:sex	1	43	0.043	0.837		0.000993	0.935219	ns
Stria Terminalis Tracts	group	1	43	1.633	0.208		0.037	0.517636	ns
Stria Terminalis Tracts	sex	1	43	1.115	0.297		0.025	0.60225	ns
Stria Terminalis Tracts	group:sex	1	43	0.157	0.693		0.004	0.867388	ns
Striatum	group	1	43	6.237	0.016	*	0.127	0.106182	ns
Striatum	sex	1	43	4.79	0.034	*	0.1	0.18615	ns
Striatum	group:sex	1	43	0.046	0.831		0.001	0.935219	ns
Subiculum	group	1	43	0.388	0.537		0.009	0.794615	ns
Subiculum	sex	1	43	0.82	0.37		0.019	0.65878	ns
Subiculum	group:sex	1	43	0.321	0.574		0.007	0.815635	ns
Substantia Nigra	group	1	43	1.189	0.282		0.027	0.590887	ns
Substantia Nigra	sex	1	43	1.424	0.239		0.032	0.5475	ns
Substantia Nigra	group:sex	1	43	0.001	0.97		3.31e-05	0.97445	ns
Superior Colliculus	group	1	43	1.301	0.26		0.029	0.575152	ns
Superior Colliculus	sex	1	43	0.008	0.927		0.000197	0.966299	ns
Superior Colliculus	group:sex	1	43	2.7	0.108		0.059	0.369563	ns
Taenia Tecta	group	1	43	0.663	0.42		0.015	0.698477	ns
Taenia Tecta	sex	1	43	5.281	0.026	*	0.109	0.153892	ns
Taenia Tecta	group:sex	1	43	0.609	0.44		0.014	0.708529	ns
Thalamus	group	1	43	6.975	0.011	*	0.14	0.0777097	ns
Thalamus	sex	1	43	17.718	0.000128	*	0.292	0.00400457	**
Thalamus	group:sex	1	43	0.069	0.794		0.002	0.920032	ns
Third Ventricle	group	1	43	0.514	0.477		0.012	0.743366	ns
Third Ventricle	sex	1	43	0.158	0.693		0.004	0.867388	ns
Third Ventricle	group:sex	1	43	0.14	0.71		0.003	0.868659	ns
Visual Cortex	group	1	43	7.79	0.008	*	0.153	0.0648889	ns
Visual Cortex	sex	1	43	0.1	0.753		0.002	0.905595	ns
Visual Cortex	group:sex	1	43	0.516	0.476		0.012	0.743366	ns
White Matter	group	1	43	0.792	0.378		0.018	0.667597	ns
White Matter	sex	1	43	8.771	0.005	*	0.169	0.0521429	ns
White Matter	group:sex	1	43	0.269	0.607		0.006	0.820574	ns
Zona Incerta	group	1	43	2.646	0.111		0.058	0.373985	ns
Zona Incerta	sex	1	43	2.208	0.145		0.049	0.441042	ns
Zona Incerta	group:sex	1	43	2.519	0.12		0.055	0.392239	ns
sum	group	1	43	1.283	0.264		0.029	0.57816	ns
sum	sex	1	43	12.387	0.001	*	0.224	0.0121667	*
sum	group:sex	1	43	0.742	0.394		0.017	0.68481	ns

## Sheet: ANOVA - Relative Volumes
ROI	Effect	DFn	DFd	F	p	p<.05	pes	FDR	FDR.signif
Amygdala	group	1	43	0.188	0.667		0.004	0.84014	ns
Amygdala	sex	1	43	5.154	0.028	*	0.107	0.145674	ns
Amygdala	group:sex	1	43	0.949	0.335		0.022	0.634737	ns
Arbor Vitae	group	1	43	0.415	0.523		0.01	0.743211	ns
Arbor Vitae	sex	1	43	1.429	0.238		0.032	0.523636	ns
Arbor Vitae	group:sex	1	43	2.508	0.121		0.055	0.402092	ns
Auditory Cortex	group	1	43	0.04	0.842		0.000937	0.942342	ns
Auditory Cortex	group:sex	1	43	0.429	0.516		0.01	0.74304	ns
Auditory Cortex	sex	1	43	13.431	0.000675	*	0.238	0.0132546	*
Bed Nuclei	group	1	43	0.044	0.835		0.001	0.942342	ns
Bed Nuclei	group:sex	1	43	0.452	0.505		0.01	0.740779	ns
Bed Nuclei	sex	1	43	34.832	5.08e-07	*	0.448	0.00010973	***
Cerebellar Cortex	group	1	43	0.01	0.921		0.000234	0.97042	ns
Cerebellar Cortex	sex	1	43	2.915	0.095		0.063	0.342	ns
Cerebellar Cortex	group:sex	1	43	1.47	0.232		0.033	0.523636	ns
Cerebellar Nuclei	group	1	43	0.19	0.665		0.004	0.84014	ns
Cerebellar Nuclei	sex	1	43	0.172	0.681		0.004	0.840549	ns
Cerebellar Nuclei	group:sex	1	43	1.526	0.223		0.034	0.512426	ns
Cerebellar White Matter	group	1	43	0.339	0.563		0.008	0.76483	ns
Cerebellar White Matter	sex	1	43	2.962	0.092		0.064	0.340475	ns
Cerebellar White Matter	group:sex	1	43	1.822	0.184		0.041	0.477209	ns
Cerebral Aqueduct	group	1	43	0.000104	0.992		2.42e-06	0.996	ns
Cerebral Aqueduct	sex	1	43	2.329	0.134		0.051	0.425647	ns
Cerebral Aqueduct	group:sex	1	43	2.059	0.159		0.046	0.454737	ns
Choroid Plexus	group	1	43	0.648	0.425		0.015	0.685075	ns
Choroid Plexus	sex	1	43	0.473	0.495		0.011	0.737379	ns
Choroid Plexus	group:sex	1	43	0.009	0.927		0.000199	0.971478	ns
Cingulate Cortex	group	1	43	0.02	0.888		0.000464	0.949545	ns
Cingulate Cortex	group:sex	1	43	0.388	0.537		0.009	0.743538	ns
Cingulate Cortex	sex	1	43	10.157	0.003	*	0.191	0.0381177	*
Claustrum	group	1	43	3.309	0.076		0.071	0.293143	ns
Claustrum	sex	1	43	1.803	0.186		0.04	0.477209	ns
Claustrum	group:sex	1	43	0.885	0.352		0.02	0.6534	ns
Corpus Callosum	group	1	43	0.042	0.839		0.000974	0.942342	ns
Corpus Callosum	sex	1	43	8.056	0.007	*	0.158	0.0581538	ns
Corpus Callosum	group:sex	1	43	0.439	0.511		0.01	0.740779	ns
Cortical Subplate	group	1	43	0.668	0.418		0.015	0.678857	ns
Cortical Subplate	group:sex	1	43	0.01	0.919		0.000241	0.97042	ns
Cortical Subplate	sex	1	43	9.373	0.004	*	0.179	0.0411429	*
Diagonal Band	group	1	43	2.478	0.123		0.054	0.402545	ns
Diagonal Band	group:sex	1	43	7.334	0.01	*	0.146	0.0744828	ns
Diagonal Band	sex	1	43	14.371	0.000463	*	0.25	0.0100008	*
Dorsal Peduncular Area	group	1	43	0.233	0.632		0.005	0.827345	ns
Dorsal Peduncular Area	sex	1	43	5.5	0.024	*	0.113	0.136421	ns
Dorsal Peduncular Area	group:sex	1	43	3.982	0.052		0.085	0.22896	ns
Entorhinal Cortex	group	1	43	6.348	0.016	*	0.129	0.0987429	ns
Entorhinal Cortex	sex	1	43	0.002	0.965		4.5e-05	0.987867	ns
Entorhinal Cortex	group:sex	1	43	9.51e-05	0.992		2.21e-06	0.996	ns
Fiber Tracts	group	1	43	0.004	0.949		9.53e-05	0.980785	ns
Fiber Tracts	sex	1	43	3.809	0.058		0.081	0.240923	ns
Fiber Tracts	group:sex	1	43	0.554	0.461		0.013	0.721565	ns
Fimbria Fornix	group	1	43	0.174	0.679		0.004	0.840549	ns
Fimbria Fornix	sex	1	43	1.722	0.196		0.039	0.4848	ns
Fimbria Fornix	group:sex	1	43	3.42e-05	0.995		7.94e-07	0.996	ns
Flocculus	group	1	43	1.905	0.175		0.042	0.469333	ns
Flocculus	sex	1	43	5.228	0.027	*	0.108	0.145674	ns
Flocculus	group:sex	1	43	1.376	0.247		0.031	0.53352	ns
Fourth Ventricle	group	1	43	0.033	0.857		0.000765	0.944449	ns
Fourth Ventricle	sex	1	43	0.506	0.481		0.012	0.7275	ns
Fourth Ventricle	group:sex	1	43	0.583	0.449		0.013	0.709489	ns
Frontal Cortex	group	1	43	0.099	0.755		0.002	0.891148	ns
Frontal Cortex	group:sex	1	43	0.173	0.68		0.004	0.840549	ns
Frontal Cortex	sex	1	43	9.849	0.003	*	0.186	0.0381177	*
Gustatory And Visceral Cortex	group	1	43	16.822	0.000179	*	0.281	0.006444	**
Gustatory And Visceral Cortex	sex	1	43	1.695	0.2		0.038	0.4848	ns
Gustatory And Visceral Cortex	group:sex	1	43	0.888	0.351		0.02	0.6534	ns
Habenula	group	1	43	0.784	0.381		0.018	0.657893	ns
Habenula	group:sex	1	43	0.101	0.752		0.002	0.891148	ns
Habenula	sex	1	43	17.81	0.000124	*	0.293	0.0053568	**
Hippocampus Dorsal	group	1	43	0.186	0.669		0.004	0.84014	ns
Hippocampus Dorsal	sex	1	43	6.489	0.015	*	0.131	0.0981818	ns
Hippocampus Dorsal	group:sex	1	43	0.285	0.596		0.007	0.794667	ns
Hippocampus Ventral	group	1	43	0.527	0.472		0.012	0.7275	ns
Hippocampus Ventral	sex	1	43	0.071	0.792		0.002	0.924714	ns
Hippocampus Ventral	group:sex	1	43	0.109	0.743		0.003	0.891148	ns
Hypothalamus	group	1	43	0.194	0.662		0.004	0.84014	ns
Hypothalamus	group:sex	1	43	1.073	0.306		0.024	0.598301	ns
Hypothalamus	sex	1	43	20.394	4.85e-05	*	0.322	0.002619	**
Inferior Colliculus	group	1	43	2.942	0.093		0.064	0.340475	ns
Inferior Colliculus	sex	1	43	2.39	0.129		0.053	0.415881	ns
Inferior Colliculus	group:sex	1	43	1.972	0.167		0.044	0.462462	ns
Infralimbic Cortex	group	1	43	0.785	0.381		0.018	0.657893	ns
Infralimbic Cortex	group:sex	1	43	3.357	0.074		0.072	0.290618	ns
Infralimbic Cortex	sex	1	43	9.398	0.004	*	0.179	0.0411429	*
Insular Cortex	group	1	43	6.293	0.016	*	0.128	0.0987429	ns
Insular Cortex	sex	1	43	2.138	0.151		0.047	0.446795	ns
Insular Cortex	group:sex	1	43	1.217	0.276		0.028	0.567771	ns
Internal Capsule	group	1	43	0.111	0.741		0.003	0.891148	ns
Internal Capsule	sex	1	43	0.581	0.45		0.013	0.709489	ns
Internal Capsule	group:sex	1	43	1.682	0.202		0.038	0.4848	ns
Lateral Geniculate	group	1	43	0.502	0.483		0.012	0.7275	ns
Lateral Geniculate	sex	1	43	1.438	0.237		0.032	0.523636	ns
Lateral Geniculate	group:sex	1	43	1.173	0.285		0.027	0.57	ns
Lateral Ventricle	group	1	43	1.05	0.311		0.024	0.598301	ns
Lateral Ventricle	sex	1	43	0.635	0.43		0.015	0.688	ns
Lateral Ventricle	group:sex	1	43	1.06	0.309		0.024	0.598301	ns
Medial Geniculate	group	1	43	5.125	0.029	*	0.106	0.145674	ns
Medial Geniculate	sex	1	43	0.318	0.576		0.007	0.77277	ns
Medial Geniculate	group:sex	1	43	0.396	0.533		0.009	0.743538	ns
Medulla	group	1	43	1.178	0.284		0.027	0.57	ns
Medulla	sex	1	43	5.996	0.018	*	0.122	0.108	ns
Medulla	group:sex	1	43	1.89	0.176		0.042	0.469333	ns
Midbrain	group	1	43	1.788	0.188		0.04	0.477209	ns
Midbrain	sex	1	43	7.967	0.007	*	0.156	0.0581538	ns
Midbrain	group:sex	1	43	1.234	0.273		0.028	0.567	ns
Midbrain White Matter	group	1	43	0.817	0.371		0.019	0.657893	ns
Midbrain White Matter	group:sex	1	43	2.5	0.121		0.055	0.402092	ns
Midbrain White Matter	sex	1	43	8.798	0.005	*	0.17	0.045	*
Motor Cortex	group	1	43	4.751	0.035	*	0.099	0.171818	ns
Motor Cortex	sex	1	43	4.534	0.039	*	0.095	0.1872	ns
Motor Cortex	group:sex	1	43	0.75	0.391		0.017	0.657893	ns
Nodulus	group	1	43	0.018	0.895		0.00041	0.952315	ns
Nodulus	sex	1	43	0.038	0.847		0.000874	0.942646	ns
Nodulus	group:sex	1	43	0.756	0.389		0.017	0.657893	ns
Nucleus Accumbens	group	1	43	0.056	0.813		0.001	0.934085	ns
Nucleus Accumbens	sex	1	43	1.171	0.285		0.027	0.57	ns
Nucleus Accumbens	group:sex	1	43	0.118	0.733		0.003	0.891148	ns
Nucleus Of Posterior Commussure	group	1	43	2.667	0.11		0.058	0.389508	ns
Nucleus Of Posterior Commussure	group:sex	1	43	0.801	0.376		0.018	0.657893	ns
Nucleus Of Posterior Commussure	sex	1	43	12.876	0.000847	*	0.23	0.015246	*
Olfactory Cortex	group	1	43	3.342	0.074		0.072	0.290618	ns
Olfactory Cortex	group:sex	1	43	1.338	0.254		0.03	0.537882	ns
Olfactory Cortex	sex	1	43	16.344	0.000215	*	0.275	0.00663429	**
Olfactory Tracts	group	1	43	2.006	0.164		0.045	0.460052	ns
Olfactory Tracts	sex	1	43	5.1	0.029	*	0.106	0.145674	ns
Olfactory Tracts	group:sex	1	43	0.025	0.875		0.000585	0.945	ns
Optic Tract	group	1	43	2.08e-05	0.996		4.84e-07	0.996	ns
Optic Tract	group:sex	1	43	0.496	0.485		0.011	0.7275	ns
Optic Tract	sex	1	43	8.923	0.005	*	0.172	0.045	*
Orbital Cortex	group	1	43	1.554	0.219		0.035	0.508645	ns
Orbital Cortex	sex	1	43	6.812	0.012	*	0.137	0.081	ns
Orbital Cortex	group:sex	1	43	1.126	0.295		0.026	0.584587	ns
Pallidum	group	1	43	2.172	0.148		0.048	0.446795	ns
Pallidum	sex	1	43	2.533	0.119		0.056	0.402092	ns
Pallidum	group:sex	1	43	0.03	0.863		0.000705	0.944727	ns
Parietal Cortex	group	1	43	3.995	0.052		0.085	0.22896	ns
Parietal Cortex	sex	1	43	0.277	0.602		0.006	0.797742	ns
Parietal Cortex	group:sex	1	43	1.689	0.201		0.038	0.4848	ns
Pedunculopontine Nucleus	group	1	43	1.847	0.181		0.041	0.47678	ns
Pedunculopontine Nucleus	group:sex	1	43	0.443	0.509		0.01	0.740779	ns
Pedunculopontine Nucleus	sex	1	43	9.248	0.004	*	0.177	0.0411429	*
Periaqueductal Gray	group	1	43	1.561	0.218		0.035	0.508645	ns
Periaqueductal Gray	group:sex	1	43	0.373	0.545		0.009	0.749809	ns
Periaqueductal Gray	sex	1	43	15.276	0.000324	*	0.262	0.007776	**
Perirhinal Cortex	group	1	43	0.732	0.397		0.017	0.657893	ns
Perirhinal Cortex	group:sex	1	43	1.042	0.313		0.024	0.598301	ns
Perirhinal Cortex	sex	1	43	22.753	2.14e-05	*	0.346	0.0015408	**
Piriform Cortex	group	1	43	0.228	0.636		0.005	0.827566	ns
Piriform Cortex	group:sex	1	43	0.105	0.747		0.002	0.891148	ns
Piriform Cortex	sex	1	43	10.033	0.003	*	0.189	0.0381177	*
Pons	group	1	43	2.171	0.148		0.048	0.446795	ns
Pons	sex	1	43	5.868	0.02	*	0.12	0.116757	ns
Pons	group:sex	1	43	0.041	0.841		0.000944	0.942342	ns
Postrhinal Cortex	group	1	43	0.051	0.823		0.001	0.940571	ns
Postrhinal Cortex	sex	1	43	2.163	0.149		0.048	0.446795	ns
Postrhinal Cortex	group:sex	1	43	0.351	0.557		0.008	0.761468	ns
Prelimbic Cortex	group	1	43	1.422	0.24		0.032	0.523636	ns
Prelimbic Cortex	group:sex	1	43	0.673	0.416		0.015	0.678857	ns
Prelimbic Cortex	sex	1	43	25.326	9.1e-06	*	0.371	0.0009828	***
Pretectal	group	1	43	0.073	0.789		0.002	0.924714	ns
Pretectal	sex	1	43	0.328	0.57		0.008	0.7695	ns
Pretectal	group:sex	1	43	3.964	0.053		0.084	0.22896	ns
Raphe	group	1	43	0.268	0.607		0.006	0.799463	ns
Raphe	group:sex	1	43	0.217	0.644		0.005	0.831857	ns
Raphe	sex	1	43	8.935	0.005	*	0.172	0.045	*
Red Nucleus	group	1	43	0.405	0.528		0.009	0.743538	ns
Red Nucleus	sex	1	43	4.239	0.046	*	0.09	0.216	ns
Red Nucleus	group:sex	1	43	0.849	0.362		0.019	0.6534	ns
Reticular Nucleus	group	1	43	0.063	0.803		0.001	0.927529	ns
Reticular Nucleus	sex	1	43	7.592	0.009	*	0.15	0.072	ns
Reticular Nucleus	group:sex	1	43	1.461	0.233		0.033	0.523636	ns
Retrosplenial Cortex	group	1	43	0.029	0.866		0.000672	0.944727	ns
Retrosplenial Cortex	sex	1	43	3.204	0.081		0.069	0.306947	ns
Retrosplenial Cortex	group:sex	1	43	0.003	0.955		7.49e-05	0.982286	ns
Secondary Sensory Cortex	group	1	43	0.74	0.395		0.017	0.657893	ns
Secondary Sensory Cortex	sex	1	43	6.921	0.012	*	0.139	0.081	ns
Secondary Sensory Cortex	group:sex	1	43	0.811	0.373		0.019	0.657893	ns
Sensory Cortex	group	1	43	0.877	0.354		0.02	0.6534	ns
Sensory Cortex	group:sex	1	43	0.847	0.363		0.019	0.6534	ns
Sensory Cortex	sex	1	43	10.629	0.002	*	0.198	0.0308571	*
Septum	group	1	43	3.582	0.065		0.077	0.264906	ns
Septum	sex	1	43	3.782	0.058		0.081	0.240923	ns
Septum	group:sex	1	43	0.213	0.647		0.005	0.831857	ns
Stria Terminalis Tracts	group	1	43	0.866	0.357		0.02	0.6534	ns
Stria Terminalis Tracts	sex	1	43	1.36	0.25		0.031	0.534653	ns
Stria Terminalis Tracts	group:sex	1	43	1.322	0.257		0.03	0.538951	ns
Striatum	group	1	43	9.06	0.004	*	0.174	0.0411429	*
Striatum	sex	1	43	0.148	0.703		0.003	0.862773	ns
Striatum	group:sex	1	43	2.055	0.159		0.046	0.454737	ns
Subiculum	group	1	43	0.004	0.947		0.000103	0.980785	ns
Subiculum	sex	1	43	2.044	0.16		0.045	0.454737	ns
Subiculum	group:sex	1	43	0.021	0.886		0.000486	0.949545	ns
Substantia Nigra	group	1	43	0.523	0.474		0.012	0.7275	ns
Substantia Nigra	sex	1	43	0.457	0.503		0.011	0.740779	ns
Substantia Nigra	group:sex	1	43	0.418	0.522		0.01	0.743211	ns
Superior Colliculus	group	1	43	0.387	0.537		0.009	0.743538	ns
Superior Colliculus	sex	1	43	7.178	0.01	*	0.143	0.0744828	ns
Superior Colliculus	group:sex	1	43	2.146	0.15		0.048	0.446795	ns
Taenia Tecta	group	1	43	0.106	0.746		0.002	0.891148	ns
Taenia Tecta	sex	1	43	0.506	0.481		0.012	0.7275	ns
Taenia Tecta	group:sex	1	43	1.776	0.19		0.04	0.477209	ns
Thalamus	group	1	43	11.28	0.002	*	0.208	0.0308571	*
Thalamus	sex	1	43	7.03	0.011	*	0.141	0.0792	ns
Thalamus	group:sex	1	43	0.774	0.384		0.018	0.657893	ns
Third Ventricle	group	1	43	0.026	0.873		0.000605	0.945	ns
Third Ventricle	sex	1	43	5.143	0.028	*	0.107	0.145674	ns
Third Ventricle	group:sex	1	43	0.0004	0.984		9.29e-06	0.996	ns
Visual Cortex	group	1	43	15.481	0.000299	*	0.265	0.007776	**
Visual Cortex	sex	1	43	4.062	0.05		0.086	0.22896	ns
Visual Cortex	group:sex	1	43	0.063	0.803		0.001	0.927529	ns
White Matter	group	1	43	0.036	0.851		0.000827	0.942646	ns
White Matter	sex	1	43	0.726	0.399		0.017	0.657893	ns
White Matter	group:sex	1	43	0.008	0.931		0.000176	0.971478	ns
Zona Incerta	group	1	43	1.925	0.173		0.043	0.469333	ns
Zona Incerta	sex	1	43	1.617	0.21		0.036	0.498462	ns
Zona Incerta	group:sex	1	43	2.503	0.121		0.055	0.402092	ns
